# Supplementary material
Source: MDPI journal article supplement (https://www.mdpi.com/2218-2004/6/2/25)
Supplement: s1 [file s1]

Archive with 6 entries (5 files):
- atom-kma
- atom-kma/tab4.dat
- atom-kma/tab5.dat
- atom-kma/tab6.dat
- atom-kma/._caption.txt
- atom-kma/caption.txt
