# Supplementary material
Source: MDPI journal article supplement (https://www.mdpi.com/2218-2004/6/2/25)
Supplement: s1 [file s1 › atom-kma/caption.txt]

Tables 4-6.   Transition wavelengths (Lambda_ij in Angstrom), radiative rates (A_ji in sec-1), oscillator 
              strengths (f_ij, dimensionless), and line strengths (S, in atomic units) for electric 
              dipole (E1), and A_ji for E2, M1 and M2 transitions in F-like Sc XIII and Ne-like Sc XII and Y XXX. 
              I and J (in columns 1 and 2) are lower and upper levels of a transition, as given in 
              Tables 1-3 for the respective ions. The ratio R(E1) is of velocity and length forms of 
              A-values for E1 transitions and is listed in the last column.
