# Supplementary material
Source: MDPI journal article supplement (https://www.mdpi.com/2218-2004/6/2/25)
Supplement: s1 [file s1 › atom-kma/tab4.dat]

Table 4. Transition wavelengths (Lambda_ij in Angstrom), radiative rates (A_ji in sec-1), oscillator 
         strengths (f_ij, dimensionless), and line strengths (S, in atomic units) for electric 
         dipole (E1), and A_ji for E2, M1 and M2 transitions in Sc XIII. I and J are the lower and
         upper levels of a transition -- see Table 1 for their definitions.
    
    I    J  Lambda     A (E1)     f (E1)     S (E1)     A (E2)     A (M1)     A (M2)      R (E1)
    1    2  2.656E+03  0.000E+00  0.000E+00  0.000E+00  3.849E-02  9.570E+02  0.000E+00   0.0E+00
    1    3  1.284E+02  5.143E+10  6.354E-02  1.074E-01  0.000E+00  0.000E+00  4.272E+02   8.4E-01
    1    4  2.856E+01  1.016E+10  1.863E-03  7.009E-04  0.000E+00  0.000E+00  4.296E+04   9.3E-01
    1    5  2.842E+01  2.717E+11  3.290E-02  1.231E-02  0.000E+00  0.000E+00  7.041E+03   9.4E-01
    1    6  2.829E+01  1.706E+09  1.023E-04  3.812E-05  0.000E+00  0.000E+00  1.414E+04   1.1E+00
    1    7  2.822E+01  5.591E+11  6.676E-02  2.481E-02  0.000E+00  0.000E+00  1.737E+03   9.4E-01
    1    8  2.807E+01  3.941E+11  2.327E-02  8.601E-03  0.000E+00  0.000E+00  1.264E+04   9.5E-01
    1    9  2.770E+01  3.539E+11  6.107E-02  2.228E-02  0.000E+00  0.000E+00  1.063E+04   9.3E-01
    1   10  2.769E+01  1.897E+09  2.181E-04  7.952E-05  0.000E+00  0.000E+00  3.051E+03   8.7E-01
    1   11  2.721E+01  0.000E+00  0.000E+00  0.000E+00  1.377E+06  1.238E+03  0.000E+00   0.0E+00
    1   12  2.720E+01  0.000E+00  0.000E+00  0.000E+00  1.759E+07  1.803E+04  0.000E+00   0.0E+00
    1   13  2.710E+01  0.000E+00  0.000E+00  0.000E+00  3.160E+07  9.887E+03  0.000E+00   0.0E+00
    1   14  2.705E+01  0.000E+00  0.000E+00  0.000E+00  7.016E+06  0.000E+00  0.000E+00   0.0E+00
    1   15  2.701E+01  0.000E+00  0.000E+00  0.000E+00  1.986E+08  2.216E+03  0.000E+00   0.0E+00
    1   16  2.700E+01  1.483E+11  8.105E-03  2.882E-03  0.000E+00  0.000E+00  3.201E+04   1.0E+00
    1   17  2.690E+01  0.000E+00  0.000E+00  0.000E+00  1.302E+08  5.680E+03  0.000E+00   0.0E+00
    1   18  2.689E+01  0.000E+00  0.000E+00  0.000E+00  2.984E+07  2.450E+01  0.000E+00   0.0E+00
    1   19  2.686E+01  0.000E+00  0.000E+00  0.000E+00  1.118E+04  2.589E+03  0.000E+00   0.0E+00
    1   20  2.682E+01  0.000E+00  0.000E+00  0.000E+00  1.456E+08  6.430E+03  0.000E+00   0.0E+00
    1   21  2.680E+01  0.000E+00  0.000E+00  0.000E+00  2.498E+08  2.819E+00  0.000E+00   0.0E+00
    1   22  2.673E+01  0.000E+00  0.000E+00  0.000E+00  8.681E+06  3.929E+03  0.000E+00   0.0E+00
    1   23  2.669E+01  0.000E+00  0.000E+00  0.000E+00  7.119E+07  2.847E+03  0.000E+00   0.0E+00
    1   24  2.668E+01  0.000E+00  0.000E+00  0.000E+00  5.727E+07  6.973E+03  0.000E+00   0.0E+00
    1   25  2.640E+01  0.000E+00  0.000E+00  0.000E+00  1.702E+07  2.971E+02  0.000E+00   0.0E+00
    1   26  2.635E+01  0.000E+00  0.000E+00  0.000E+00  1.932E+08  0.000E+00  0.000E+00   0.0E+00
    1   27  2.623E+01  0.000E+00  0.000E+00  0.000E+00  1.504E+07  9.730E+03  0.000E+00   0.0E+00
    1   28  2.620E+01  0.000E+00  0.000E+00  0.000E+00  5.473E+07  9.653E+03  0.000E+00   0.0E+00
    1   29  2.588E+01  0.000E+00  0.000E+00  0.000E+00  2.103E+07  4.039E+02  0.000E+00   0.0E+00
    1   30  2.585E+01  0.000E+00  0.000E+00  0.000E+00  1.236E+08  1.065E+04  0.000E+00   0.0E+00
    1   31  2.564E+01  0.000E+00  0.000E+00  0.000E+00  1.784E+07  1.429E+03  0.000E+00   0.0E+00
    1   32  2.556E+01  0.000E+00  0.000E+00  0.000E+00  2.357E+05  8.866E+02  0.000E+00   0.0E+00
    1   33  2.555E+01  0.000E+00  0.000E+00  0.000E+00  0.000E+00  0.000E+00  7.415E+05   0.0E+00
    1   34  2.554E+01  4.054E+07  5.948E-06  2.001E-06  0.000E+00  0.000E+00  4.591E+03   6.6E-01
    1   35  2.552E+01  2.277E+09  2.223E-04  7.468E-05  0.000E+00  0.000E+00  1.059E+04   9.6E-01
    1   36  2.548E+01  9.740E+08  4.741E-05  1.591E-05  0.000E+00  0.000E+00  1.489E+05   1.0E+00
    1   38  2.536E+01  0.000E+00  0.000E+00  0.000E+00  0.000E+00  0.000E+00  1.461E+05   0.0E+00
    1   39  2.531E+01  2.690E+11  1.292E-02  4.304E-03  0.000E+00  0.000E+00  2.884E+05   9.1E-01
    1   40  2.526E+01  3.929E+11  5.638E-02  1.876E-02  0.000E+00  0.000E+00  3.032E+04   9.5E-01
    1   41  2.526E+01  3.991E+11  3.818E-02  1.270E-02  0.000E+00  0.000E+00  8.862E+04   9.3E-01
    1   42  2.522E+01  2.258E+11  1.077E-02  3.576E-03  0.000E+00  0.000E+00  8.113E+05   9.3E-01
    1   43  2.521E+01  2.046E+10  1.950E-03  6.474E-04  0.000E+00  0.000E+00  8.295E+02   9.5E-01
    1   44  2.522E+01  0.000E+00  0.000E+00  0.000E+00  0.000E+00  0.000E+00  3.590E+03   0.0E+00
    1   45  2.520E+01  2.956E+11  4.221E-02  1.400E-02  0.000E+00  0.000E+00  3.244E+05   9.5E-01
    1   46  2.516E+01  7.467E+11  7.084E-02  2.347E-02  0.000E+00  0.000E+00  1.225E+05   9.4E-01
    1   47  2.514E+01  2.270E+11  3.226E-02  1.068E-02  0.000E+00  0.000E+00  2.500E+03   9.5E-01
    1   48  2.505E+01  7.205E+10  6.781E-03  2.237E-03  0.000E+00  0.000E+00  9.144E+04   9.3E-01
    1   49  2.502E+01  2.278E+12  3.207E-01  1.057E-01  0.000E+00  0.000E+00  4.764E+03   9.5E-01
    1   50  2.483E+01  0.000E+00  0.000E+00  0.000E+00  0.000E+00  0.000E+00  9.072E+03   0.0E+00
    1   52  2.470E+01  4.834E+12  2.212E-01  7.195E-02  0.000E+00  0.000E+00  3.265E+05   9.0E-01
    1   53  2.469E+01  3.016E+11  4.134E-02  1.344E-02  0.000E+00  0.000E+00  6.072E+04   9.6E-01
    1   54  2.467E+01  0.000E+00  0.000E+00  0.000E+00  0.000E+00  0.000E+00  3.246E+04   0.0E+00
    1   55  2.460E+01  6.680E+12  6.059E-01  1.963E-01  0.000E+00  0.000E+00  2.424E+05   9.2E-01
    1   56  2.458E+01  6.076E+12  8.259E-01  2.674E-01  0.000E+00  0.000E+00  1.651E+04   9.6E-01
    1   57  2.451E+01  7.517E+11  6.772E-02  2.186E-02  0.000E+00  0.000E+00  7.996E+04   9.6E-01
    1   58  2.451E+01  1.608E+12  7.245E-02  2.339E-02  0.000E+00  0.000E+00  9.940E+04   9.2E-01
    1   59  2.417E+01  7.732E+11  1.016E-01  3.233E-02  0.000E+00  0.000E+00  1.510E+05   9.6E-01
    1   60  2.413E+01  6.649E+10  5.804E-03  1.844E-03  0.000E+00  0.000E+00  1.598E+02   1.0E+00
    1   61  2.387E+01  0.000E+00  0.000E+00  0.000E+00  2.093E+02  2.304E+03  0.000E+00   0.0E+00
    1   62  2.377E+01  0.000E+00  0.000E+00  0.000E+00  6.929E+04  6.434E+02  0.000E+00   0.0E+00
    1   63  2.368E+01  0.000E+00  0.000E+00  0.000E+00  5.313E+04  1.568E+02  0.000E+00   0.0E+00
    1   64  2.356E+01  0.000E+00  0.000E+00  0.000E+00  1.346E+06  6.397E+01  0.000E+00   0.0E+00
    1   65  2.344E+01  0.000E+00  0.000E+00  0.000E+00  2.864E+06  2.384E+02  0.000E+00   0.0E+00
    1   66  2.299E+01  6.378E+07  5.052E-06  1.529E-06  0.000E+00  0.000E+00  3.535E+04   5.4E-01
    1   67  2.285E+01  0.000E+00  0.000E+00  0.000E+00  0.000E+00  0.000E+00  1.067E+05   0.0E+00
    1   68  2.285E+01  1.207E+11  1.417E-02  4.262E-03  0.000E+00  0.000E+00  7.639E+01   1.0E+00
    1   69  2.280E+01  1.445E+11  1.126E-02  3.379E-03  0.000E+00  0.000E+00  1.961E+04   9.5E-01
    1   70  2.274E+01  4.807E+11  5.591E-02  1.675E-02  0.000E+00  0.000E+00  7.822E+04   1.0E+00
    1   71  2.274E+01  2.117E+10  8.206E-04  2.457E-04  0.000E+00  0.000E+00  8.406E+01   9.3E-01
    1   72  2.268E+01  7.750E+11  5.979E-02  1.786E-02  0.000E+00  0.000E+00  1.618E+04   9.5E-01
    1   73  2.266E+01  3.728E+11  4.306E-02  1.285E-02  0.000E+00  0.000E+00  2.096E+04   1.0E+00
    1   74  2.265E+01  3.029E+10  1.165E-03  3.473E-04  0.000E+00  0.000E+00  2.006E+04   9.8E-01
    1   75  2.265E+01  2.244E+11  1.726E-02  5.147E-03  0.000E+00  0.000E+00  6.875E+03   9.9E-01
    1   76  2.261E+01  7.117E+11  2.728E-02  8.124E-03  0.000E+00  0.000E+00  8.459E+03   9.6E-01
    1   77  2.256E+01  1.087E+10  8.295E-04  2.465E-04  0.000E+00  0.000E+00  4.842E+03   7.4E-01
    1   78  2.242E+01  0.000E+00  0.000E+00  0.000E+00  3.231E+03  7.871E+02  0.000E+00   0.0E+00
    1   79  2.241E+01  0.000E+00  0.000E+00  0.000E+00  1.042E+05  1.739E+03  0.000E+00   0.0E+00
    1   80  2.237E+01  6.381E+11  2.393E-02  7.047E-03  0.000E+00  0.000E+00  5.659E+03   1.0E+00
    1   81  2.180E+01  0.000E+00  0.000E+00  0.000E+00  2.445E+04  2.086E+02  0.000E+00   0.0E+00
    1   82  2.177E+01  0.000E+00  0.000E+00  0.000E+00  8.185E+05  1.952E+01  0.000E+00   0.0E+00
    1   84  2.174E+01  0.000E+00  0.000E+00  0.000E+00  7.207E+06  1.597E+01  0.000E+00   0.0E+00
    1   85  2.172E+01  0.000E+00  0.000E+00  0.000E+00  4.140E+07  0.000E+00  0.000E+00   0.0E+00
    1   86  2.167E+01  0.000E+00  0.000E+00  0.000E+00  9.654E+07  1.069E+02  0.000E+00   0.0E+00
    1   87  2.164E+01  0.000E+00  0.000E+00  0.000E+00  5.051E+07  7.469E+01  0.000E+00   0.0E+00
    1   88  2.161E+01  0.000E+00  0.000E+00  0.000E+00  6.636E+08  0.000E+00  0.000E+00   0.0E+00
    1   89  2.157E+01  9.573E+10  6.679E-03  1.898E-03  0.000E+00  0.000E+00  3.241E+03   1.0E+00
    1   90  2.155E+01  0.000E+00  0.000E+00  0.000E+00  1.414E+07  3.011E+01  0.000E+00   0.0E+00
    1   91  2.154E+01  3.598E+11  3.754E-02  1.065E-02  0.000E+00  0.000E+00  4.381E+04   9.5E-01
    1   92  2.154E+01  0.000E+00  0.000E+00  0.000E+00  1.498E+07  4.910E+00  0.000E+00   0.0E+00
    1   93  2.153E+01  0.000E+00  0.000E+00  0.000E+00  9.335E+06  1.958E+01  0.000E+00   0.0E+00
    1   94  2.153E+01  0.000E+00  0.000E+00  0.000E+00  1.171E+09  0.000E+00  0.000E+00   0.0E+00
    1   95  2.151E+01  0.000E+00  0.000E+00  0.000E+00  1.606E+09  1.808E-01  0.000E+00   0.0E+00
    1   96  2.148E+01  6.229E+10  2.155E-03  6.095E-04  0.000E+00  0.000E+00  1.887E+04   1.3E+00
    1   97  2.147E+01  1.437E+11  9.927E-03  2.806E-03  0.000E+00  0.000E+00  4.044E+04   1.3E+00
    1   98  2.146E+01  0.000E+00  0.000E+00  0.000E+00  1.386E+09  6.283E+00  0.000E+00   0.0E+00
    1   99  2.142E+01  0.000E+00  0.000E+00  0.000E+00  8.041E+07  2.817E+01  0.000E+00   0.0E+00
    1  100  2.137E+01  9.936E+09  3.401E-04  9.570E-05  0.000E+00  0.000E+00  6.580E+04   3.2E-01
    1  101  2.134E+01  0.000E+00  0.000E+00  0.000E+00  2.070E+09  2.749E+01  0.000E+00   0.0E+00
    1  102  2.125E+01  0.000E+00  0.000E+00  0.000E+00  4.964E+08  4.492E+00  0.000E+00   0.0E+00
    2    3  1.349E+02  2.193E+10  5.984E-02  5.315E-02  0.000E+00  0.000E+00  0.000E+00   8.3E-01
    2    4  2.887E+01  0.000E+00  0.000E+00  0.000E+00  0.000E+00  0.000E+00  5.375E+03   0.0E+00
    2    5  2.873E+01  1.450E+10  3.588E-03  6.786E-04  0.000E+00  0.000E+00  9.933E+03   9.6E-01
    2    6  2.860E+01  1.341E+10  1.644E-03  3.095E-04  0.000E+00  0.000E+00  0.000E+00   9.9E-01
    2    7  2.852E+01  5.685E+10  1.387E-02  2.604E-03  0.000E+00  0.000E+00  1.958E+04   9.5E-01
    2    8  2.837E+01  5.204E+11  6.278E-02  1.173E-02  0.000E+00  0.000E+00  0.000E+00   9.4E-01
    2    9  2.799E+01  0.000E+00  0.000E+00  0.000E+00  0.000E+00  0.000E+00  2.605E+04   0.0E+00
    2   10  2.798E+01  3.808E+11  8.939E-02  1.647E-02  0.000E+00  0.000E+00  1.187E+03   9.3E-01
    2   11  2.750E+01  0.000E+00  0.000E+00  0.000E+00  1.254E+04  0.000E+00  0.000E+00   0.0E+00
    2   12  2.748E+01  0.000E+00  0.000E+00  0.000E+00  2.940E+06  1.821E+03  0.000E+00   0.0E+00
    2   13  2.738E+01  0.000E+00  0.000E+00  0.000E+00  0.000E+00  9.273E+03  0.000E+00   0.0E+00
    2   15  2.729E+01  0.000E+00  0.000E+00  0.000E+00  1.842E+07  0.000E+00  0.000E+00   0.0E+00
    2   16  2.728E+01  2.133E+11  2.379E-02  4.274E-03  0.000E+00  0.000E+00  0.000E+00   1.0E+00
    2   17  2.717E+01  0.000E+00  0.000E+00  0.000E+00  0.000E+00  1.254E+04  0.000E+00   0.0E+00
    2   18  2.717E+01  0.000E+00  0.000E+00  0.000E+00  2.284E+07  1.323E+03  0.000E+00   0.0E+00
    2   19  2.713E+01  0.000E+00  0.000E+00  0.000E+00  0.000E+00  4.137E+02  0.000E+00   0.0E+00
    2   20  2.709E+01  0.000E+00  0.000E+00  0.000E+00  2.665E+07  0.000E+00  0.000E+00   0.0E+00
    2   21  2.708E+01  0.000E+00  0.000E+00  0.000E+00  4.806E+06  1.264E+04  0.000E+00   0.0E+00
    2   22  2.700E+01  0.000E+00  0.000E+00  0.000E+00  2.065E+07  5.648E+02  0.000E+00   0.0E+00
    2   23  2.696E+01  0.000E+00  0.000E+00  0.000E+00  0.000E+00  4.567E+00  0.000E+00   0.0E+00
    2   24  2.695E+01  0.000E+00  0.000E+00  0.000E+00  2.107E+08  1.954E+01  0.000E+00   0.0E+00
    2   25  2.667E+01  0.000E+00  0.000E+00  0.000E+00  1.733E+08  0.000E+00  0.000E+00   0.0E+00
    2   27  2.650E+01  0.000E+00  0.000E+00  0.000E+00  3.523E+07  4.624E+02  0.000E+00   0.0E+00
    2   28  2.647E+01  0.000E+00  0.000E+00  0.000E+00  4.200E+07  0.000E+00  0.000E+00   0.0E+00
    2   29  2.613E+01  0.000E+00  0.000E+00  0.000E+00  6.204E+07  8.900E+03  0.000E+00   0.0E+00
    2   30  2.611E+01  0.000E+00  0.000E+00  0.000E+00  0.000E+00  4.411E+02  0.000E+00   0.0E+00
    2   31  2.589E+01  0.000E+00  0.000E+00  0.000E+00  5.898E+07  5.390E+03  0.000E+00   0.0E+00
    2   32  2.580E+01  0.000E+00  0.000E+00  0.000E+00  0.000E+00  3.513E+02  0.000E+00   0.0E+00
    2   34  2.579E+01  0.000E+00  0.000E+00  0.000E+00  0.000E+00  0.000E+00  1.011E+05   0.0E+00
    2   35  2.576E+01  6.086E+09  1.211E-03  2.055E-04  0.000E+00  0.000E+00  3.084E+04   9.2E-01
    2   36  2.573E+01  8.975E+09  8.908E-04  1.509E-04  0.000E+00  0.000E+00  0.000E+00   9.5E-01
    2   39  2.555E+01  6.188E+07  6.057E-06  1.019E-06  0.000E+00  0.000E+00  0.000E+00   1.6E+00
    2   40  2.550E+01  0.000E+00  0.000E+00  0.000E+00  0.000E+00  0.000E+00  4.858E+04   0.0E+00
    2   41  2.550E+01  8.895E+10  1.735E-02  2.913E-03  0.000E+00  0.000E+00  9.315E+04   9.7E-01
    2   42  2.546E+01  1.109E+11  1.078E-02  1.808E-03  0.000E+00  0.000E+00  0.000E+00   9.5E-01
    2   43  2.546E+01  3.244E+10  6.304E-03  1.057E-03  0.000E+00  0.000E+00  1.053E+04   9.6E-01
    2   45  2.544E+01  0.000E+00  0.000E+00  0.000E+00  0.000E+00  0.000E+00  2.503E+03   0.0E+00
    2   46  2.540E+01  6.009E+11  1.162E-01  1.943E-02  0.000E+00  0.000E+00  2.415E+04   9.5E-01
    2   47  2.538E+01  0.000E+00  0.000E+00  0.000E+00  0.000E+00  0.000E+00  3.872E+05   0.0E+00
    2   48  2.529E+01  4.866E+11  9.334E-02  1.554E-02  0.000E+00  0.000E+00  6.418E+05   9.4E-01
    2   49  2.526E+01  0.000E+00  0.000E+00  0.000E+00  0.000E+00  0.000E+00  1.618E+05   0.0E+00
    2   52  2.494E+01  1.101E+12  1.027E-01  1.686E-02  0.000E+00  0.000E+00  0.000E+00   9.0E-01
    2   53  2.492E+01  0.000E+00  0.000E+00  0.000E+00  0.000E+00  0.000E+00  2.339E+05   0.0E+00
    2   55  2.483E+01  8.349E+11  1.543E-01  2.522E-02  0.000E+00  0.000E+00  3.106E+04   9.0E-01
    2   56  2.481E+01  0.000E+00  0.000E+00  0.000E+00  0.000E+00  0.000E+00  7.042E+04   0.0E+00
    2   57  2.474E+01  5.046E+12  9.262E-01  1.509E-01  0.000E+00  0.000E+00  4.709E+04   9.6E-01
    2   58  2.474E+01  6.382E+12  5.857E-01  9.542E-02  0.000E+00  0.000E+00  0.000E+00   9.1E-01
    2   59  2.439E+01  0.000E+00  0.000E+00  0.000E+00  0.000E+00  0.000E+00  2.350E+04   0.0E+00
    2   60  2.435E+01  2.929E+12  5.207E-01  8.349E-02  0.000E+00  0.000E+00  2.228E+04   9.5E-01
    2   61  2.409E+01  0.000E+00  0.000E+00  0.000E+00  5.498E+01  0.000E+00  0.000E+00   0.0E+00
    2   62  2.399E+01  0.000E+00  0.000E+00  0.000E+00  6.924E+04  6.676E+02  0.000E+00   0.0E+00
    2   63  2.390E+01  0.000E+00  0.000E+00  0.000E+00  0.000E+00  6.137E+02  0.000E+00   0.0E+00
    2   64  2.377E+01  0.000E+00  0.000E+00  0.000E+00  1.261E+06  4.253E+02  0.000E+00   0.0E+00
    2   65  2.365E+01  0.000E+00  0.000E+00  0.000E+00  0.000E+00  1.241E+02  0.000E+00   0.0E+00
    2   66  2.319E+01  5.794E+07  9.338E-06  1.426E-06  0.000E+00  0.000E+00  1.927E+04   7.6E-01
    2   68  2.305E+01  0.000E+00  0.000E+00  0.000E+00  0.000E+00  0.000E+00  5.692E+03   0.0E+00
    2   69  2.299E+01  7.243E+09  1.148E-03  1.738E-04  0.000E+00  0.000E+00  3.583E+02   1.2E+00
    2   70  2.294E+01  0.000E+00  0.000E+00  0.000E+00  0.000E+00  0.000E+00  9.396E+02   0.0E+00
    2   71  2.294E+01  2.524E+10  1.991E-03  3.006E-04  0.000E+00  0.000E+00  0.000E+00   8.9E-01
    2   72  2.288E+01  5.793E+10  9.093E-03  1.370E-03  0.000E+00  0.000E+00  8.600E+03   9.2E-01
    2   73  2.286E+01  0.000E+00  0.000E+00  0.000E+00  0.000E+00  0.000E+00  5.761E+04   0.0E+00
    2   74  2.284E+01  3.338E+10  2.612E-03  3.928E-04  0.000E+00  0.000E+00  0.000E+00   9.2E-01
    2   75  2.284E+01  1.365E+11  2.136E-02  3.212E-03  0.000E+00  0.000E+00  5.475E+04   1.0E+00
    2   76  2.281E+01  3.507E+11  2.735E-02  4.107E-03  0.000E+00  0.000E+00  0.000E+00   9.2E-01
    2   77  2.276E+01  6.850E+11  1.064E-01  1.594E-02  0.000E+00  0.000E+00  3.200E+04   1.0E+00
    2   78  2.261E+01  0.000E+00  0.000E+00  0.000E+00  1.644E+04  3.616E+02  0.000E+00   0.0E+00
    2   79  2.260E+01  0.000E+00  0.000E+00  0.000E+00  0.000E+00  1.326E+02  0.000E+00   0.0E+00
    2   80  2.256E+01  8.150E+11  6.216E-02  9.233E-03  0.000E+00  0.000E+00  0.000E+00   9.8E-01
    2   81  2.198E+01  0.000E+00  0.000E+00  0.000E+00  0.000E+00  1.848E+01  0.000E+00   0.0E+00
    2   82  2.195E+01  0.000E+00  0.000E+00  0.000E+00  1.771E+05  6.172E-01  0.000E+00   0.0E+00
    2   84  2.192E+01  0.000E+00  0.000E+00  0.000E+00  9.652E+05  0.000E+00  0.000E+00   0.0E+00
    2   86  2.185E+01  0.000E+00  0.000E+00  0.000E+00  4.654E+06  0.000E+00  0.000E+00   0.0E+00
    2   87  2.182E+01  0.000E+00  0.000E+00  0.000E+00  1.659E+07  1.155E+02  0.000E+00   0.0E+00
    2   89  2.175E+01  3.614E+11  5.126E-02  7.341E-03  0.000E+00  0.000E+00  8.216E+02   9.4E-01
    2   90  2.173E+01  0.000E+00  0.000E+00  0.000E+00  0.000E+00  4.322E+01  0.000E+00   0.0E+00
    2   91  2.171E+01  0.000E+00  0.000E+00  0.000E+00  0.000E+00  0.000E+00  5.012E+04   0.0E+00
    2   92  2.171E+01  0.000E+00  0.000E+00  0.000E+00  1.425E+08  0.000E+00  0.000E+00   0.0E+00
    2   93  2.171E+01  0.000E+00  0.000E+00  0.000E+00  5.031E+05  1.170E+00  0.000E+00   0.0E+00
    2   95  2.168E+01  0.000E+00  0.000E+00  0.000E+00  6.028E+07  0.000E+00  0.000E+00   0.0E+00
    2   96  2.166E+01  2.435E+11  1.712E-02  2.441E-03  0.000E+00  0.000E+00  0.000E+00   1.2E+00
    2   97  2.164E+01  1.000E+11  1.404E-02  2.001E-03  0.000E+00  0.000E+00  1.251E+04   1.2E+00
    2   98  2.164E+01  0.000E+00  0.000E+00  0.000E+00  2.887E+08  2.697E+01  0.000E+00   0.0E+00
    2   99  2.160E+01  0.000E+00  0.000E+00  0.000E+00  1.389E+09  0.000E+00  0.000E+00   0.0E+00
    2  100  2.154E+01  3.206E+09  2.230E-04  3.163E-05  0.000E+00  0.000E+00  0.000E+00   1.8E-01
    2  101  2.152E+01  0.000E+00  0.000E+00  0.000E+00  0.000E+00  2.902E+00  0.000E+00   0.0E+00
    2  102  2.143E+01  0.000E+00  0.000E+00  0.000E+00  1.387E+09  1.175E+00  0.000E+00   0.0E+00
    3    4  3.673E+01  0.000E+00  0.000E+00  0.000E+00  2.018E+04  0.000E+00  0.000E+00   0.0E+00
    3    5  3.650E+01  0.000E+00  0.000E+00  0.000E+00  2.064E+04  2.436E+01  0.000E+00   0.0E+00
    3    6  3.629E+01  0.000E+00  0.000E+00  0.000E+00  0.000E+00  7.083E+00  0.000E+00   0.0E+00
    3    7  3.617E+01  0.000E+00  0.000E+00  0.000E+00  1.427E+04  1.104E+01  0.000E+00   0.0E+00
    3    8  3.592E+01  0.000E+00  0.000E+00  0.000E+00  0.000E+00  3.090E+01  0.000E+00   0.0E+00
    3    9  3.532E+01  0.000E+00  0.000E+00  0.000E+00  7.616E+05  0.000E+00  0.000E+00   0.0E+00
    3   10  3.531E+01  0.000E+00  0.000E+00  0.000E+00  7.795E+05  6.421E-02  0.000E+00   0.0E+00
    3   11  3.453E+01  0.000E+00  0.000E+00  0.000E+00  0.000E+00  0.000E+00  1.992E-01   0.0E+00
    3   12  3.451E+01  2.581E+08  9.216E-05  2.094E-05  0.000E+00  0.000E+00  2.433E+01   1.3E-01
    3   13  3.436E+01  3.224E+08  5.705E-05  1.291E-05  0.000E+00  0.000E+00  0.000E+00   7.2E-02
    3   15  3.421E+01  0.000E+00  0.000E+00  0.000E+00  0.000E+00  0.000E+00  4.231E+01   0.0E+00
    3   16  3.419E+01  0.000E+00  0.000E+00  0.000E+00  0.000E+00  3.755E+01  0.000E+00   0.0E+00
    3   17  3.402E+01  1.396E+09  2.423E-04  5.428E-05  0.000E+00  0.000E+00  0.000E+00   5.9E-02
    3   18  3.401E+01  1.707E+07  5.920E-06  1.326E-06  0.000E+00  0.000E+00  2.814E+01   6.1E-03
    3   19  3.397E+01  5.612E+08  9.706E-05  2.171E-05  0.000E+00  0.000E+00  0.000E+00   3.3E-01
    3   20  3.390E+01  0.000E+00  0.000E+00  0.000E+00  0.000E+00  0.000E+00  6.227E+01   0.0E+00
    3   21  3.387E+01  1.092E+09  3.758E-04  8.382E-05  0.000E+00  0.000E+00  3.194E+02   1.2E-02
    3   22  3.375E+01  1.303E+09  4.452E-04  9.894E-05  0.000E+00  0.000E+00  6.678E+01   3.5E-01
    3   23  3.369E+01  2.349E+08  3.997E-05  8.867E-06  0.000E+00  0.000E+00  0.000E+00   2.8E-03
    3   24  3.369E+01  9.655E+08  3.285E-04  7.286E-05  0.000E+00  0.000E+00  7.213E+00   1.7E-01
    3   25  3.323E+01  0.000E+00  0.000E+00  0.000E+00  0.000E+00  0.000E+00  1.363E+01   0.0E+00
    3   27  3.297E+01  5.711E+08  1.861E-04  4.041E-05  0.000E+00  0.000E+00  2.319E+02   4.5E-01
    3   28  3.292E+01  0.000E+00  0.000E+00  0.000E+00  0.000E+00  0.000E+00  8.171E+01   0.0E+00
    3   29  3.241E+01  1.661E+10  5.231E-03  1.116E-03  0.000E+00  0.000E+00  1.864E+02   8.1E-01
    3   30  3.237E+01  2.436E+10  3.828E-03  8.159E-04  0.000E+00  0.000E+00  0.000E+00   6.8E-01
    3   31  3.204E+01  5.228E+09  1.610E-03  3.396E-04  0.000E+00  0.000E+00  1.243E+03   4.4E-01
    3   32  3.191E+01  6.131E+07  9.358E-06  1.966E-06  0.000E+00  0.000E+00  0.000E+00   1.0E+01
    3   34  3.189E+01  0.000E+00  0.000E+00  0.000E+00  5.291E+03  0.000E+00  0.000E+00   0.0E+00
    3   35  3.184E+01  0.000E+00  0.000E+00  0.000E+00  8.740E+03  2.020E+01  0.000E+00   0.0E+00
    3   36  3.179E+01  0.000E+00  0.000E+00  0.000E+00  0.000E+00  9.476E+00  0.000E+00   0.0E+00
    3   39  3.152E+01  0.000E+00  0.000E+00  0.000E+00  0.000E+00  8.400E+01  0.000E+00   0.0E+00
    3   40  3.145E+01  0.000E+00  0.000E+00  0.000E+00  6.291E+04  0.000E+00  0.000E+00   0.0E+00
    3   41  3.145E+01  0.000E+00  0.000E+00  0.000E+00  2.977E+04  1.558E+02  0.000E+00   0.0E+00
    3   42  3.139E+01  0.000E+00  0.000E+00  0.000E+00  0.000E+00  9.829E+00  0.000E+00   0.0E+00
    3   43  3.138E+01  0.000E+00  0.000E+00  0.000E+00  2.096E+05  2.796E+00  0.000E+00   0.0E+00
    3   45  3.135E+01  0.000E+00  0.000E+00  0.000E+00  3.569E+04  0.000E+00  0.000E+00   0.0E+00
    3   46  3.129E+01  0.000E+00  0.000E+00  0.000E+00  3.161E+05  4.229E-02  0.000E+00   0.0E+00
    3   47  3.125E+01  0.000E+00  0.000E+00  0.000E+00  1.630E+04  0.000E+00  0.000E+00   0.0E+00
    3   48  3.113E+01  0.000E+00  0.000E+00  0.000E+00  1.736E+03  7.199E+01  0.000E+00   0.0E+00
    3   49  3.108E+01  0.000E+00  0.000E+00  0.000E+00  1.052E+06  0.000E+00  0.000E+00   0.0E+00
    3   52  3.059E+01  0.000E+00  0.000E+00  0.000E+00  0.000E+00  3.003E+01  0.000E+00   0.0E+00
    3   53  3.057E+01  0.000E+00  0.000E+00  0.000E+00  4.411E+04  0.000E+00  0.000E+00   0.0E+00
    3   55  3.043E+01  0.000E+00  0.000E+00  0.000E+00  8.832E+04  4.489E+01  0.000E+00   0.0E+00
    3   56  3.041E+01  0.000E+00  0.000E+00  0.000E+00  1.695E+04  0.000E+00  0.000E+00   0.0E+00
    3   57  3.030E+01  0.000E+00  0.000E+00  0.000E+00  3.235E+05  2.322E-02  0.000E+00   0.0E+00
    3   58  3.030E+01  0.000E+00  0.000E+00  0.000E+00  0.000E+00  5.197E-01  0.000E+00   0.0E+00
    3   59  2.978E+01  0.000E+00  0.000E+00  0.000E+00  8.897E+06  0.000E+00  0.000E+00   0.0E+00
    3   60  2.972E+01  0.000E+00  0.000E+00  0.000E+00  9.705E+06  5.652E-01  0.000E+00   0.0E+00
    3   61  2.932E+01  0.000E+00  0.000E+00  0.000E+00  0.000E+00  0.000E+00  2.482E+04   0.0E+00
    3   62  2.917E+01  4.453E+10  1.136E-02  2.182E-03  0.000E+00  0.000E+00  2.514E+03   9.2E-01
    3   63  2.904E+01  1.950E+10  2.465E-03  4.713E-04  0.000E+00  0.000E+00  0.000E+00   9.3E-01
    3   64  2.886E+01  4.204E+11  1.050E-01  1.994E-02  0.000E+00  0.000E+00  9.586E+03   9.1E-01
    3   65  2.867E+01  5.219E+11  6.433E-02  1.215E-02  0.000E+00  0.000E+00  0.000E+00   9.2E-01
    3   66  2.800E+01  0.000E+00  0.000E+00  0.000E+00  1.642E+03  8.782E+03  0.000E+00   0.0E+00
    3   68  2.779E+01  0.000E+00  0.000E+00  0.000E+00  3.571E+07  0.000E+00  0.000E+00   0.0E+00
    3   69  2.772E+01  0.000E+00  0.000E+00  0.000E+00  1.993E+07  1.880E+03  0.000E+00   0.0E+00
    3   70  2.764E+01  0.000E+00  0.000E+00  0.000E+00  1.242E+08  0.000E+00  0.000E+00   0.0E+00
    3   71  2.764E+01  0.000E+00  0.000E+00  0.000E+00  0.000E+00  5.343E+02  0.000E+00   0.0E+00
    3   72  2.755E+01  0.000E+00  0.000E+00  0.000E+00  1.416E+06  7.968E+02  0.000E+00   0.0E+00
    3   73  2.752E+01  0.000E+00  0.000E+00  0.000E+00  6.726E+07  0.000E+00  0.000E+00   0.0E+00
    3   74  2.750E+01  0.000E+00  0.000E+00  0.000E+00  0.000E+00  2.694E+03  0.000E+00   0.0E+00
    3   75  2.750E+01  0.000E+00  0.000E+00  0.000E+00  8.650E+07  9.416E+03  0.000E+00   0.0E+00
    3   76  2.745E+01  0.000E+00  0.000E+00  0.000E+00  0.000E+00  2.102E+04  0.000E+00   0.0E+00
    3   77  2.737E+01  0.000E+00  0.000E+00  0.000E+00  1.471E+08  3.718E+03  0.000E+00   0.0E+00
    3   78  2.716E+01  2.673E+11  5.910E-02  1.057E-02  0.000E+00  0.000E+00  2.560E+04   9.5E-01
    3   79  2.714E+01  1.811E+11  2.000E-02  3.574E-03  0.000E+00  0.000E+00  0.000E+00   9.6E-01
    3   80  2.708E+01  0.000E+00  0.000E+00  0.000E+00  0.000E+00  2.735E+02  0.000E+00   0.0E+00
    3   81  2.625E+01  2.030E+09  2.097E-04  3.625E-05  0.000E+00  0.000E+00  0.000E+00   9.2E-01
    3   82  2.622E+01  5.964E+09  1.230E-03  2.123E-04  0.000E+00  0.000E+00  1.117E+05   9.2E-01
    3   84  2.617E+01  0.000E+00  0.000E+00  0.000E+00  0.000E+00  0.000E+00  6.103E+05   0.0E+00
    3   86  2.608E+01  0.000E+00  0.000E+00  0.000E+00  0.000E+00  0.000E+00  9.557E+04   0.0E+00
    3   87  2.602E+01  2.374E+10  4.820E-03  8.259E-04  0.000E+00  0.000E+00  2.959E+04   9.3E-01
    3   89  2.593E+01  0.000E+00  0.000E+00  0.000E+00  1.099E+08  2.321E+02  0.000E+00   0.0E+00
    3   90  2.590E+01  1.818E+11  1.828E-02  3.116E-03  0.000E+00  0.000E+00  0.000E+00   9.3E-01
    3   91  2.588E+01  0.000E+00  0.000E+00  0.000E+00  1.401E+08  0.000E+00  0.000E+00   0.0E+00
    3   92  2.588E+01  0.000E+00  0.000E+00  0.000E+00  0.000E+00  0.000E+00  8.187E+04   0.0E+00
    3   93  2.587E+01  9.769E+10  1.960E-02  3.339E-03  0.000E+00  0.000E+00  8.474E+03   9.3E-01
    3   95  2.584E+01  0.000E+00  0.000E+00  0.000E+00  0.000E+00  0.000E+00  6.380E+04   0.0E+00
    3   96  2.580E+01  0.000E+00  0.000E+00  0.000E+00  0.000E+00  8.160E+03  0.000E+00   0.0E+00
    3   97  2.577E+01  0.000E+00  0.000E+00  0.000E+00  8.919E+05  7.972E+03  0.000E+00   0.0E+00
    3   98  2.577E+01  3.548E+11  7.065E-02  1.199E-02  0.000E+00  0.000E+00  3.213E+05   9.3E-01
    3   99  2.572E+01  0.000E+00  0.000E+00  0.000E+00  0.000E+00  0.000E+00  3.151E+04   0.0E+00
    3  100  2.564E+01  0.000E+00  0.000E+00  0.000E+00  0.000E+00  1.096E+03  0.000E+00   0.0E+00
    3  101  2.560E+01  4.989E+12  4.901E-01  8.261E-02  0.000E+00  0.000E+00  0.000E+00   9.3E-01
    3  102  2.547E+01  5.170E+12  1.006E+00  1.687E-01  0.000E+00  0.000E+00  8.331E+04   9.3E-01
    4    5  5.701E+03  0.000E+00  0.000E+00  0.000E+00  1.912E-04  9.073E+01  0.000E+00   0.0E+00
    4    6  3.000E+03  0.000E+00  0.000E+00  0.000E+00  1.087E-02  0.000E+00  0.000E+00   0.0E+00
    4    7  2.374E+03  0.000E+00  0.000E+00  0.000E+00  7.242E-03  5.300E+02  0.000E+00   0.0E+00
    4    8  1.622E+03  0.000E+00  0.000E+00  0.000E+00  1.040E-03  0.000E+00  0.000E+00   0.0E+00
    4    9  9.189E+02  0.000E+00  0.000E+00  0.000E+00  2.659E-01  1.379E+03  0.000E+00   0.0E+00
    4   10  9.094E+02  0.000E+00  0.000E+00  0.000E+00  1.030E-01  1.857E+02  0.000E+00   0.0E+00
    4   11  5.770E+02  2.034E+09  1.015E-01  1.157E+00  0.000E+00  0.000E+00  3.589E-01   1.0E+00
    4   12  5.708E+02  1.643E+09  5.349E-02  6.031E-01  0.000E+00  0.000E+00  6.860E-03   9.0E-01
    4   13  5.316E+02  0.000E+00  0.000E+00  0.000E+00  0.000E+00  0.000E+00  5.653E-01   0.0E+00
    4   14  5.113E+02  3.330E+09  1.740E-01  1.757E+00  0.000E+00  0.000E+00  5.357E-01   1.2E+00
    4   15  4.990E+02  8.513E+07  3.177E-03  3.131E-02  0.000E+00  0.000E+00  3.234E-01   1.3E+00
    4   16  4.949E+02  0.000E+00  0.000E+00  0.000E+00  3.036E-01  0.000E+00  0.000E+00   0.0E+00
    4   17  4.613E+02  0.000E+00  0.000E+00  0.000E+00  0.000E+00  0.000E+00  6.300E-01   0.0E+00
    4   18  4.596E+02  8.651E+06  1.827E-04  1.659E-03  0.000E+00  0.000E+00  3.944E-01   7.1E-02
    4   19  4.512E+02  0.000E+00  0.000E+00  0.000E+00  0.000E+00  0.000E+00  2.527E-01   0.0E+00
    4   20  4.390E+02  1.807E+08  5.220E-03  4.526E-02  0.000E+00  0.000E+00  2.150E-01   1.3E+00
    4   21  4.353E+02  1.973E+08  3.737E-03  3.213E-02  0.000E+00  0.000E+00  1.070E+00   8.7E-01
    4   22  4.165E+02  1.324E+09  2.295E-02  1.888E-01  0.000E+00  0.000E+00  4.049E-01   6.1E-01
    4   23  4.070E+02  0.000E+00  0.000E+00  0.000E+00  0.000E+00  0.000E+00  5.466E-01   0.0E+00
    4   24  4.061E+02  3.109E+08  5.125E-03  4.112E-02  0.000E+00  0.000E+00  1.517E-01   5.8E-01
    4   25  3.491E+02  1.323E+05  2.416E-06  1.666E-05  0.000E+00  0.000E+00  5.563E-03   2.0E+00
    4   26  3.408E+02  4.514E+06  1.048E-04  7.058E-04  0.000E+00  0.000E+00  1.283E-03   4.3E-01
    4   27  3.219E+02  4.894E+06  5.068E-05  3.223E-04  0.000E+00  0.000E+00  6.370E-02   6.1E-01
    4   28  3.175E+02  2.358E+07  3.565E-04  2.236E-03  0.000E+00  0.000E+00  8.802E-04   6.3E-01
    4   29  2.756E+02  4.376E+07  3.321E-04  1.808E-03  0.000E+00  0.000E+00  6.140E+00   6.9E-01
    4   30  2.727E+02  0.000E+00  0.000E+00  0.000E+00  0.000E+00  0.000E+00  8.758E-01   0.0E+00
    4   31  2.511E+02  1.632E+07  1.028E-04  5.102E-04  0.000E+00  0.000E+00  9.707E-01   8.6E-01
    4   32  2.429E+02  0.000E+00  0.000E+00  0.000E+00  0.000E+00  0.000E+00  1.799E+00   0.0E+00
    4   33  2.423E+02  0.000E+00  0.000E+00  0.000E+00  1.101E+05  3.291E-01  0.000E+00   0.0E+00
    4   34  2.416E+02  0.000E+00  0.000E+00  0.000E+00  1.137E+05  1.934E+00  0.000E+00   0.0E+00
    4   35  2.394E+02  0.000E+00  0.000E+00  0.000E+00  9.013E+04  2.216E-02  0.000E+00   0.0E+00
    4   36  2.365E+02  0.000E+00  0.000E+00  0.000E+00  4.488E+04  0.000E+00  0.000E+00   0.0E+00
    4   37  2.308E+02  0.000E+00  0.000E+00  0.000E+00  1.624E+05  0.000E+00  0.000E+00   0.0E+00
    4   38  2.261E+02  0.000E+00  0.000E+00  0.000E+00  2.026E+04  5.222E-04  0.000E+00   0.0E+00
    4   39  2.223E+02  0.000E+00  0.000E+00  0.000E+00  1.364E+05  0.000E+00  0.000E+00   0.0E+00
    4   40  2.188E+02  0.000E+00  0.000E+00  0.000E+00  8.461E+01  2.778E-01  0.000E+00   0.0E+00
    4   41  2.186E+02  0.000E+00  0.000E+00  0.000E+00  6.655E+04  9.274E+00  0.000E+00   0.0E+00
    4   42  2.156E+02  0.000E+00  0.000E+00  0.000E+00  1.496E+02  0.000E+00  0.000E+00   0.0E+00
    4   43  2.152E+02  0.000E+00  0.000E+00  0.000E+00  4.849E+03  5.662E-02  0.000E+00   0.0E+00
    4   44  2.152E+02  0.000E+00  0.000E+00  0.000E+00  7.870E+03  1.098E-02  0.000E+00   0.0E+00
    4   45  2.139E+02  0.000E+00  0.000E+00  0.000E+00  2.846E+04  2.607E-01  0.000E+00   0.0E+00
    4   46  2.110E+02  0.000E+00  0.000E+00  0.000E+00  1.155E+03  1.280E-02  0.000E+00   0.0E+00
    4   47  2.096E+02  0.000E+00  0.000E+00  0.000E+00  2.996E+03  3.048E-02  0.000E+00   0.0E+00
    4   48  2.041E+02  0.000E+00  0.000E+00  0.000E+00  1.985E+03  8.540E-01  0.000E+00   0.0E+00
    4   49  2.018E+02  0.000E+00  0.000E+00  0.000E+00  6.643E-01  2.789E-01  0.000E+00   0.0E+00
    4   50  1.904E+02  0.000E+00  0.000E+00  0.000E+00  3.172E+01  1.100E-03  0.000E+00   0.0E+00
    4   51  1.902E+02  0.000E+00  0.000E+00  0.000E+00  4.220E+02  0.000E+00  0.000E+00   0.0E+00
    4   52  1.830E+02  0.000E+00  0.000E+00  0.000E+00  5.521E+00  0.000E+00  0.000E+00   0.0E+00
    4   53  1.821E+02  0.000E+00  0.000E+00  0.000E+00  2.414E+00  2.262E+00  0.000E+00   0.0E+00
    4   54  1.809E+02  0.000E+00  0.000E+00  0.000E+00  4.983E+02  5.708E-03  0.000E+00   0.0E+00
    4   55  1.773E+02  0.000E+00  0.000E+00  0.000E+00  4.271E+02  6.142E+00  0.000E+00   0.0E+00
    4   56  1.766E+02  0.000E+00  0.000E+00  0.000E+00  1.152E+03  1.757E+01  0.000E+00   0.0E+00
    4   57  1.730E+02  0.000E+00  0.000E+00  0.000E+00  3.302E+02  1.466E+00  0.000E+00   0.0E+00
    4   58  1.730E+02  0.000E+00  0.000E+00  0.000E+00  2.469E+02  0.000E+00  0.000E+00   0.0E+00
    4   59  1.573E+02  0.000E+00  0.000E+00  0.000E+00  2.282E+01  1.020E-02  0.000E+00   0.0E+00
    4   60  1.556E+02  0.000E+00  0.000E+00  0.000E+00  6.865E+00  6.027E-02  0.000E+00   0.0E+00
    4   61  1.454E+02  3.247E+10  1.029E-01  2.957E-01  0.000E+00  0.000E+00  7.174E+01   8.3E-01
    4   62  1.417E+02  2.187E+10  4.391E-02  1.230E-01  0.000E+00  0.000E+00  2.280E+00   8.3E-01
    4   63  1.387E+02  0.000E+00  0.000E+00  0.000E+00  0.000E+00  0.000E+00  1.956E+01   0.0E+00
    4   64  1.346E+02  1.549E+09  2.806E-03  7.459E-03  0.000E+00  0.000E+00  2.418E+01   8.3E-01
    4   65  1.307E+02  0.000E+00  0.000E+00  0.000E+00  0.000E+00  0.000E+00  3.130E+00   0.0E+00
    4   66  1.178E+02  0.000E+00  0.000E+00  0.000E+00  1.019E+02  3.400E+01  0.000E+00   0.0E+00
    4   67  1.144E+02  0.000E+00  0.000E+00  0.000E+00  3.468E+02  5.539E+00  0.000E+00   0.0E+00
    4   68  1.142E+02  0.000E+00  0.000E+00  0.000E+00  5.354E+02  7.426E+00  0.000E+00   0.0E+00
    4   69  1.129E+02  0.000E+00  0.000E+00  0.000E+00  4.318E+02  4.737E-01  0.000E+00   0.0E+00
    4   70  1.117E+02  0.000E+00  0.000E+00  0.000E+00  2.253E+02  4.484E-02  0.000E+00   0.0E+00
    4   71  1.116E+02  0.000E+00  0.000E+00  0.000E+00  3.482E+02  0.000E+00  0.000E+00   0.0E+00
    4   72  1.103E+02  0.000E+00  0.000E+00  0.000E+00  2.932E+01  2.427E+00  0.000E+00   0.0E+00
    4   73  1.098E+02  0.000E+00  0.000E+00  0.000E+00  2.033E+00  9.916E-01  0.000E+00   0.0E+00
    4   74  1.094E+02  0.000E+00  0.000E+00  0.000E+00  3.930E+02  0.000E+00  0.000E+00   0.0E+00
    4   75  1.094E+02  0.000E+00  0.000E+00  0.000E+00  4.033E+02  8.490E+00  0.000E+00   0.0E+00
    4   76  1.086E+02  0.000E+00  0.000E+00  0.000E+00  4.331E+02  0.000E+00  0.000E+00   0.0E+00
    4   77  1.074E+02  0.000E+00  0.000E+00  0.000E+00  3.993E+01  1.806E+00  0.000E+00   0.0E+00
    4   78  1.042E+02  3.057E+09  3.316E-03  6.824E-03  0.000E+00  0.000E+00  2.918E+02   5.3E-01
    4   79  1.040E+02  0.000E+00  0.000E+00  0.000E+00  0.000E+00  0.000E+00  1.536E+02   0.0E+00
    4   80  1.031E+02  0.000E+00  0.000E+00  0.000E+00  5.328E+02  0.000E+00  0.000E+00   0.0E+00
    4   81  9.202E+01  0.000E+00  0.000E+00  0.000E+00  0.000E+00  0.000E+00  5.541E+00   0.0E+00
    4   82  9.166E+01  3.310E+07  2.779E-05  5.032E-05  0.000E+00  0.000E+00  4.188E+00   2.3E+00
    4   83  9.123E+01  0.000E+00  0.000E+00  0.000E+00  0.000E+00  0.000E+00  3.560E+00   0.0E+00
    4   84  9.100E+01  7.038E+07  8.736E-05  1.570E-04  0.000E+00  0.000E+00  1.410E+00   2.3E+00
    4   85  9.065E+01  7.500E+06  1.232E-05  2.206E-05  0.000E+00  0.000E+00  5.139E-01   2.7E+00
    4   86  8.992E+01  1.691E+05  2.049E-07  3.640E-07  0.000E+00  0.000E+00  3.186E-01   2.2E+00
    4   87  8.926E+01  7.337E+04  5.843E-08  1.030E-07  0.000E+00  0.000E+00  9.690E-02   1.9E+00
    4   88  8.873E+01  5.757E+07  9.060E-05  1.588E-04  0.000E+00  0.000E+00  3.809E-01   3.0E+00
    4   89  8.817E+01  0.000E+00  0.000E+00  0.000E+00  5.022E+01  3.646E-01  0.000E+00   0.0E+00
    4   90  8.778E+01  0.000E+00  0.000E+00  0.000E+00  0.000E+00  0.000E+00  3.274E-03   0.0E+00
    4   91  8.760E+01  0.000E+00  0.000E+00  0.000E+00  6.124E+01  2.670E+00  0.000E+00   0.0E+00
    4   92  8.760E+01  1.115E+07  1.283E-05  2.220E-05  0.000E+00  0.000E+00  4.060E-01   2.4E+00
    4   93  8.747E+01  2.331E+06  1.783E-06  3.080E-06  0.000E+00  0.000E+00  4.262E-02   2.0E+00
    4   94  8.743E+01  7.442E+07  1.137E-04  1.964E-04  0.000E+00  0.000E+00  3.169E-01   1.7E+00
    4   95  8.713E+01  6.836E+06  7.781E-06  1.339E-05  0.000E+00  0.000E+00  3.929E-01   9.9E-01
    4   96  8.667E+01  0.000E+00  0.000E+00  0.000E+00  3.222E+01  0.000E+00  0.000E+00   0.0E+00
    4   97  8.640E+01  0.000E+00  0.000E+00  0.000E+00  5.977E+01  5.905E+00  0.000E+00   0.0E+00
    4   98  8.636E+01  6.842E+05  5.100E-07  8.701E-07  0.000E+00  0.000E+00  1.594E-01   6.8E-01
    4   99  8.574E+01  9.210E+04  1.015E-07  1.719E-07  0.000E+00  0.000E+00  7.600E-02   6.7E+00
    4  100  8.486E+01  0.000E+00  0.000E+00  0.000E+00  1.840E+01  0.000E+00  0.000E+00   0.0E+00
    4  101  8.445E+01  0.000E+00  0.000E+00  0.000E+00  0.000E+00  0.000E+00  1.796E-01   0.0E+00
    4  102  8.308E+01  3.513E+06  2.424E-06  3.978E-06  0.000E+00  0.000E+00  2.397E-02   1.2E+00
    5    6  6.333E+03  0.000E+00  0.000E+00  0.000E+00  1.872E-05  1.218E+02  0.000E+00   0.0E+00
    5    7  4.068E+03  0.000E+00  0.000E+00  0.000E+00  5.563E-04  6.060E+01  0.000E+00   0.0E+00
    5    8  2.268E+03  0.000E+00  0.000E+00  0.000E+00  1.179E-02  3.572E+02  0.000E+00   0.0E+00
    5    9  1.096E+03  0.000E+00  0.000E+00  0.000E+00  1.763E-02  9.124E-03  0.000E+00   0.0E+00
    5   10  1.082E+03  0.000E+00  0.000E+00  0.000E+00  1.119E-01  9.690E+02  0.000E+00   0.0E+00
    5   11  6.420E+02  4.369E+07  4.049E-03  3.423E-02  0.000E+00  0.000E+00  4.261E-02   7.6E-01
    5   12  6.343E+02  2.409E+08  1.453E-02  1.214E-01  0.000E+00  0.000E+00  2.333E-02   1.3E+00
    5   13  5.862E+02  1.748E+09  4.504E-02  3.477E-01  0.000E+00  0.000E+00  1.176E-03   1.0E+00
    5   14  5.616E+02  0.000E+00  0.000E+00  0.000E+00  0.000E+00  0.000E+00  4.289E-01   0.0E+00
    5   15  5.468E+02  2.496E+09  1.678E-01  1.209E+00  0.000E+00  0.000E+00  2.609E-02   1.2E+00
    5   16  5.420E+02  0.000E+00  0.000E+00  0.000E+00  2.927E-01  2.610E+03  0.000E+00   0.0E+00
    5   17  5.019E+02  2.426E+07  4.581E-04  3.028E-03  0.000E+00  0.000E+00  1.338E-01   1.1E+00
    5   18  5.000E+02  1.582E+09  5.928E-02  3.903E-01  0.000E+00  0.000E+00  6.692E-02   1.1E+00
    5   19  4.899E+02  3.485E+08  6.271E-03  4.046E-02  0.000E+00  0.000E+00  1.702E-01   1.1E+00
    5   20  4.756E+02  1.684E+08  8.565E-03  5.364E-02  0.000E+00  0.000E+00  5.693E-01   9.1E-01
    5   21  4.713E+02  2.457E+08  8.182E-03  5.078E-02  0.000E+00  0.000E+00  2.903E-01   9.3E-01
    5   22  4.493E+02  9.661E+08  2.923E-02  1.730E-01  0.000E+00  0.000E+00  1.046E-02   6.5E-01
    5   23  4.383E+02  2.155E+08  3.103E-03  1.791E-02  0.000E+00  0.000E+00  2.479E-01   8.6E-01
    5   24  4.373E+02  4.196E+08  1.203E-02  6.927E-02  0.000E+00  0.000E+00  2.868E-01   7.7E-01
    5   25  3.718E+02  1.826E+05  5.679E-06  2.781E-05  0.000E+00  0.000E+00  1.604E-03   3.5E-01
    5   26  3.625E+02  0.000E+00  0.000E+00  0.000E+00  0.000E+00  0.000E+00  5.836E-04   0.0E+00
    5   27  3.412E+02  1.005E+08  1.754E-03  7.880E-03  0.000E+00  0.000E+00  3.059E-02   6.0E-01
    5   28  3.363E+02  4.676E+05  1.189E-05  5.265E-05  0.000E+00  0.000E+00  1.695E-05   1.7E+00
    5   29  2.896E+02  1.955E+09  2.458E-02  9.371E-02  0.000E+00  0.000E+00  8.290E-01   7.7E-01
    5   30  2.864E+02  1.489E+08  9.160E-04  3.455E-03  0.000E+00  0.000E+00  8.250E-01   9.6E-01
    5   31  2.627E+02  2.175E+08  2.250E-03  7.784E-03  0.000E+00  0.000E+00  1.162E-01   8.0E-01
    5   32  2.537E+02  2.428E+08  1.171E-03  3.913E-03  0.000E+00  0.000E+00  1.905E+00   8.0E-01
    5   33  2.531E+02  0.000E+00  0.000E+00  0.000E+00  1.409E+04  0.000E+00  0.000E+00   0.0E+00
    5   34  2.523E+02  0.000E+00  0.000E+00  0.000E+00  2.204E+03  2.419E-01  0.000E+00   0.0E+00
    5   35  2.499E+02  0.000E+00  0.000E+00  0.000E+00  2.762E+04  2.879E+00  0.000E+00   0.0E+00
    5   36  2.467E+02  0.000E+00  0.000E+00  0.000E+00  7.617E+04  1.152E+00  0.000E+00   0.0E+00
    5   38  2.354E+02  0.000E+00  0.000E+00  0.000E+00  1.257E+05  0.000E+00  0.000E+00   0.0E+00
    5   39  2.313E+02  0.000E+00  0.000E+00  0.000E+00  4.777E+04  1.126E+00  0.000E+00   0.0E+00
    5   40  2.275E+02  0.000E+00  0.000E+00  0.000E+00  1.348E+05  1.208E-02  0.000E+00   0.0E+00
    5   41  2.273E+02  0.000E+00  0.000E+00  0.000E+00  1.106E+05  2.191E-01  0.000E+00   0.0E+00
    5   42  2.241E+02  0.000E+00  0.000E+00  0.000E+00  6.683E+03  8.472E+00  0.000E+00   0.0E+00
    5   43  2.236E+02  0.000E+00  0.000E+00  0.000E+00  1.390E+04  1.038E-01  0.000E+00   0.0E+00
    5   44  2.237E+02  0.000E+00  0.000E+00  0.000E+00  4.033E+03  0.000E+00  0.000E+00   0.0E+00
    5   45  2.222E+02  0.000E+00  0.000E+00  0.000E+00  3.076E+04  1.566E-01  0.000E+00   0.0E+00
    5   46  2.191E+02  0.000E+00  0.000E+00  0.000E+00  3.382E+03  7.043E-01  0.000E+00   0.0E+00
    5   47  2.176E+02  0.000E+00  0.000E+00  0.000E+00  3.772E+03  2.274E-01  0.000E+00   0.0E+00
    5   48  2.116E+02  0.000E+00  0.000E+00  0.000E+00  3.730E+03  8.641E-01  0.000E+00   0.0E+00
    5   49  2.092E+02  0.000E+00  0.000E+00  0.000E+00  6.979E+03  3.765E-01  0.000E+00   0.0E+00
    5   50  1.969E+02  0.000E+00  0.000E+00  0.000E+00  9.377E+01  0.000E+00  0.000E+00   0.0E+00
    5   52  1.890E+02  0.000E+00  0.000E+00  0.000E+00  1.184E+03  4.624E+01  0.000E+00   0.0E+00
    5   53  1.881E+02  0.000E+00  0.000E+00  0.000E+00  5.281E+03  3.285E-04  0.000E+00   0.0E+00
    5   54  1.868E+02  0.000E+00  0.000E+00  0.000E+00  1.240E+02  0.000E+00  0.000E+00   0.0E+00
    5   55  1.829E+02  0.000E+00  0.000E+00  0.000E+00  2.281E+04  3.234E+00  0.000E+00   0.0E+00
    5   56  1.823E+02  0.000E+00  0.000E+00  0.000E+00  2.315E+04  3.044E-01  0.000E+00   0.0E+00
    5   57  1.784E+02  0.000E+00  0.000E+00  0.000E+00  5.485E+03  1.130E+01  0.000E+00   0.0E+00
    5   58  1.784E+02  0.000E+00  0.000E+00  0.000E+00  1.994E+04  6.616E-02  0.000E+00   0.0E+00
    5   59  1.617E+02  0.000E+00  0.000E+00  0.000E+00  2.061E+03  6.668E-02  0.000E+00   0.0E+00
    5   60  1.599E+02  0.000E+00  0.000E+00  0.000E+00  1.859E+03  3.470E-01  0.000E+00   0.0E+00
    5   61  1.492E+02  9.001E+09  4.507E-02  8.855E-02  0.000E+00  0.000E+00  1.851E+01   8.3E-01
    5   62  1.454E+02  7.253E+09  2.297E-02  4.397E-02  0.000E+00  0.000E+00  5.734E+01   8.3E-01
    5   63  1.422E+02  3.226E+10  4.888E-02  9.151E-02  0.000E+00  0.000E+00  1.157E+01   8.3E-01
    5   64  1.379E+02  4.799E+09  1.367E-02  2.482E-02  0.000E+00  0.000E+00  1.075E+01   8.3E-01
    5   65  1.338E+02  1.669E+09  2.239E-03  3.945E-03  0.000E+00  0.000E+00  4.996E+00   7.9E-01
    5   66  1.202E+02  0.000E+00  0.000E+00  0.000E+00  1.586E+01  5.520E-01  0.000E+00   0.0E+00
    5   67  1.167E+02  0.000E+00  0.000E+00  0.000E+00  1.954E+02  0.000E+00  0.000E+00   0.0E+00
    5   68  1.166E+02  0.000E+00  0.000E+00  0.000E+00  2.404E+02  2.349E+00  0.000E+00   0.0E+00
    5   69  1.152E+02  0.000E+00  0.000E+00  0.000E+00  5.933E+02  1.380E+01  0.000E+00   0.0E+00
    5   70  1.139E+02  0.000E+00  0.000E+00  0.000E+00  2.586E+03  1.433E+00  0.000E+00   0.0E+00
    5   71  1.139E+02  0.000E+00  0.000E+00  0.000E+00  4.862E+02  1.771E-02  0.000E+00   0.0E+00
    5   72  1.124E+02  0.000E+00  0.000E+00  0.000E+00  3.008E+02  8.474E-01  0.000E+00   0.0E+00
    5   73  1.119E+02  0.000E+00  0.000E+00  0.000E+00  4.926E+02  9.596E-01  0.000E+00   0.0E+00
    5   74  1.116E+02  0.000E+00  0.000E+00  0.000E+00  7.083E+01  1.874E+01  0.000E+00   0.0E+00
    5   75  1.115E+02  0.000E+00  0.000E+00  0.000E+00  1.562E+03  1.464E-01  0.000E+00   0.0E+00
    5   76  1.107E+02  0.000E+00  0.000E+00  0.000E+00  9.093E+02  1.587E-02  0.000E+00   0.0E+00
    5   77  1.095E+02  0.000E+00  0.000E+00  0.000E+00  5.169E+01  2.602E-01  0.000E+00   0.0E+00
    5   78  1.061E+02  2.955E+08  4.988E-04  6.971E-04  0.000E+00  0.000E+00  2.724E+01   5.7E-01
    5   79  1.059E+02  3.584E+09  3.012E-03  4.200E-03  0.000E+00  0.000E+00  3.945E+02   5.3E-01
    5   80  1.050E+02  0.000E+00  0.000E+00  0.000E+00  1.581E+02  3.224E+00  0.000E+00   0.0E+00
    5   81  9.353E+01  2.813E+07  1.845E-05  2.272E-05  0.000E+00  0.000E+00  2.087E-02   2.7E+00
    5   82  9.316E+01  8.172E+06  1.063E-05  1.304E-05  0.000E+00  0.000E+00  7.304E-01   3.1E+00
    5   84  9.247E+01  4.542E+06  8.734E-06  1.064E-05  0.000E+00  0.000E+00  3.525E+00   1.0E+00
    5   85  9.212E+01  0.000E+00  0.000E+00  0.000E+00  0.000E+00  0.000E+00  2.933E+00   0.0E+00
    5   86  9.136E+01  2.588E+07  4.858E-05  5.844E-05  0.000E+00  0.000E+00  1.935E-02   1.4E+00
    5   87  9.068E+01  1.143E+07  1.409E-05  1.682E-05  0.000E+00  0.000E+00  5.803E-02   1.4E+00
    5   88  9.013E+01  0.000E+00  0.000E+00  0.000E+00  0.000E+00  0.000E+00  5.095E-01   0.0E+00
    5   89  8.956E+01  0.000E+00  0.000E+00  0.000E+00  4.994E+02  4.798E+00  0.000E+00   0.0E+00
    5   90  8.915E+01  1.567E+07  9.334E-06  1.096E-05  0.000E+00  0.000E+00  2.553E-01   1.7E+00
    5   91  8.896E+01  0.000E+00  0.000E+00  0.000E+00  1.283E+03  2.113E-02  0.000E+00   0.0E+00
    5   92  8.897E+01  7.451E+07  1.326E-04  1.554E-04  0.000E+00  0.000E+00  1.853E+00   2.3E+00
    5   93  8.883E+01  4.216E+07  4.987E-05  5.834E-05  0.000E+00  0.000E+00  2.158E+00   1.9E+00
    5   94  8.879E+01  0.000E+00  0.000E+00  0.000E+00  0.000E+00  0.000E+00  1.461E+00   0.0E+00
    5   95  8.849E+01  1.715E+08  3.020E-04  3.519E-04  0.000E+00  0.000E+00  5.308E-01   6.3E-01
    5   96  8.801E+01  0.000E+00  0.000E+00  0.000E+00  6.910E+02  2.875E+00  0.000E+00   0.0E+00
    5   97  8.774E+01  0.000E+00  0.000E+00  0.000E+00  5.429E+02  8.336E-01  0.000E+00   0.0E+00
    5   98  8.769E+01  8.731E+07  1.007E-04  1.162E-04  0.000E+00  0.000E+00  3.463E-01   4.5E-01
    5   99  8.705E+01  4.934E+07  8.407E-05  9.637E-05  0.000E+00  0.000E+00  6.311E-01   4.9E-01
    5  100  8.614E+01  0.000E+00  0.000E+00  0.000E+00  5.861E+00  4.170E+00  0.000E+00   0.0E+00
    5  101  8.572E+01  7.598E+07  4.185E-05  4.724E-05  0.000E+00  0.000E+00  7.312E-01   5.0E-01
    5  102  8.431E+01  8.069E+07  8.599E-05  9.548E-05  0.000E+00  0.000E+00  1.140E+00   3.3E-01
    6    7  1.137E+04  0.000E+00  0.000E+00  0.000E+00  2.918E-07  4.168E+00  0.000E+00   0.0E+00
    6    8  3.533E+03  0.000E+00  0.000E+00  0.000E+00  0.000E+00  7.437E+00  0.000E+00   0.0E+00
    6    9  1.325E+03  0.000E+00  0.000E+00  0.000E+00  1.849E-03  0.000E+00  0.000E+00   0.0E+00
    6   10  1.305E+03  0.000E+00  0.000E+00  0.000E+00  1.207E-02  5.024E+01  0.000E+00   0.0E+00
    6   11  7.144E+02  0.000E+00  0.000E+00  0.000E+00  0.000E+00  0.000E+00  3.155E-03   0.0E+00
    6   12  7.049E+02  1.164E+08  1.734E-02  8.048E-02  0.000E+00  0.000E+00  5.185E-03   1.1E+00
    6   13  6.461E+02  9.837E+07  6.155E-03  2.618E-02  0.000E+00  0.000E+00  0.000E+00   8.8E-01
    6   15  5.985E+02  0.000E+00  0.000E+00  0.000E+00  0.000E+00  0.000E+00  1.463E-02   0.0E+00
    6   16  5.927E+02  0.000E+00  0.000E+00  0.000E+00  0.000E+00  1.801E+03  0.000E+00   0.0E+00
    6   17  5.451E+02  4.471E+07  1.991E-03  7.147E-03  0.000E+00  0.000E+00  0.000E+00   1.3E+00
    6   18  5.428E+02  1.278E+09  1.129E-01  4.036E-01  0.000E+00  0.000E+00  9.505E-02   1.2E+00
    6   19  5.310E+02  2.593E+09  1.096E-01  3.832E-01  0.000E+00  0.000E+00  0.000E+00   1.1E+00
    6   20  5.142E+02  0.000E+00  0.000E+00  0.000E+00  0.000E+00  0.000E+00  2.668E-01   0.0E+00
    6   21  5.092E+02  5.267E+07  4.094E-03  1.373E-02  0.000E+00  0.000E+00  8.696E-02   9.7E-01
    6   22  4.836E+02  1.550E+09  1.087E-01  3.461E-01  0.000E+00  0.000E+00  3.626E-01   8.1E-01
    6   23  4.709E+02  1.319E+08  4.386E-03  1.360E-02  0.000E+00  0.000E+00  0.000E+00   1.1E+00
    6   24  4.697E+02  4.497E+07  2.975E-03  9.200E-03  0.000E+00  0.000E+00  7.261E-01   4.3E-01
    6   25  3.950E+02  0.000E+00  0.000E+00  0.000E+00  0.000E+00  0.000E+00  1.326E-04   0.0E+00
    6   27  3.606E+02  2.384E+05  9.296E-06  2.207E-05  0.000E+00  0.000E+00  8.841E-04   5.2E+00
    6   28  3.551E+02  0.000E+00  0.000E+00  0.000E+00  0.000E+00  0.000E+00  2.335E-03   0.0E+00
    6   29  3.035E+02  1.959E+06  5.410E-05  1.081E-04  0.000E+00  0.000E+00  5.440E-01   6.5E-01
    6   30  3.000E+02  2.341E+07  3.159E-04  6.241E-04  0.000E+00  0.000E+00  0.000E+00   9.5E-01
    6   31  2.741E+02  1.019E+06  2.294E-05  4.140E-05  0.000E+00  0.000E+00  3.934E-02   2.2E+00
    6   32  2.643E+02  5.674E+07  5.941E-04  1.034E-03  0.000E+00  0.000E+00  0.000E+00   7.9E-01
    6   34  2.628E+02  0.000E+00  0.000E+00  0.000E+00  9.918E+03  0.000E+00  0.000E+00   0.0E+00
    6   35  2.602E+02  0.000E+00  0.000E+00  0.000E+00  7.256E+03  1.701E-02  0.000E+00   0.0E+00
    6   36  2.567E+02  0.000E+00  0.000E+00  0.000E+00  0.000E+00  7.065E-01  0.000E+00   0.0E+00
    6   39  2.401E+02  0.000E+00  0.000E+00  0.000E+00  0.000E+00  3.899E-01  0.000E+00   0.0E+00
    6   40  2.360E+02  0.000E+00  0.000E+00  0.000E+00  2.736E+04  0.000E+00  0.000E+00   0.0E+00
    6   41  2.358E+02  0.000E+00  0.000E+00  0.000E+00  2.782E+03  8.115E-01  0.000E+00   0.0E+00
    6   42  2.323E+02  0.000E+00  0.000E+00  0.000E+00  0.000E+00  3.040E-01  0.000E+00   0.0E+00
    6   43  2.318E+02  0.000E+00  0.000E+00  0.000E+00  1.411E+05  5.522E-02  0.000E+00   0.0E+00
    6   45  2.303E+02  0.000E+00  0.000E+00  0.000E+00  1.055E+05  0.000E+00  0.000E+00   0.0E+00
    6   46  2.270E+02  0.000E+00  0.000E+00  0.000E+00  6.633E+02  4.590E-01  0.000E+00   0.0E+00
    6   47  2.254E+02  0.000E+00  0.000E+00  0.000E+00  9.804E+03  0.000E+00  0.000E+00   0.0E+00
    6   48  2.190E+02  0.000E+00  0.000E+00  0.000E+00  2.494E+03  2.499E-02  0.000E+00   0.0E+00
    6   49  2.163E+02  0.000E+00  0.000E+00  0.000E+00  1.709E+03  0.000E+00  0.000E+00   0.0E+00
    6   52  1.949E+02  0.000E+00  0.000E+00  0.000E+00  0.000E+00  1.601E+01  0.000E+00   0.0E+00
    6   53  1.939E+02  0.000E+00  0.000E+00  0.000E+00  2.378E+01  0.000E+00  0.000E+00   0.0E+00
    6   55  1.884E+02  0.000E+00  0.000E+00  0.000E+00  1.911E+02  4.315E+00  0.000E+00   0.0E+00
    6   56  1.877E+02  0.000E+00  0.000E+00  0.000E+00  1.483E+01  0.000E+00  0.000E+00   0.0E+00
    6   57  1.836E+02  0.000E+00  0.000E+00  0.000E+00  5.734E+02  2.197E+00  0.000E+00   0.0E+00
    6   58  1.836E+02  0.000E+00  0.000E+00  0.000E+00  0.000E+00  1.394E+01  0.000E+00   0.0E+00
    6   59  1.660E+02  0.000E+00  0.000E+00  0.000E+00  6.555E+00  0.000E+00  0.000E+00   0.0E+00
    6   60  1.641E+02  0.000E+00  0.000E+00  0.000E+00  5.213E+02  1.602E-02  0.000E+00   0.0E+00
    6   61  1.528E+02  0.000E+00  0.000E+00  0.000E+00  0.000E+00  0.000E+00  9.481E+00   0.0E+00
    6   62  1.488E+02  1.744E+10  1.157E-01  1.134E-01  0.000E+00  0.000E+00  1.809E+01   8.4E-01
    6   63  1.454E+02  7.358E+09  2.333E-02  2.234E-02  0.000E+00  0.000E+00  0.000E+00   8.5E-01
    6   64  1.409E+02  1.023E+09  6.090E-03  5.650E-03  0.000E+00  0.000E+00  6.121E-02   8.7E-01
    6   65  1.367E+02  5.730E+08  1.605E-03  1.444E-03  0.000E+00  0.000E+00  0.000E+00   7.9E-01
    6   66  1.226E+02  0.000E+00  0.000E+00  0.000E+00  2.337E+00  1.332E+01  0.000E+00   0.0E+00
    6   68  1.188E+02  0.000E+00  0.000E+00  0.000E+00  7.071E+01  0.000E+00  0.000E+00   0.0E+00
    6   69  1.174E+02  0.000E+00  0.000E+00  0.000E+00  5.978E+01  1.065E-01  0.000E+00   0.0E+00
    6   70  1.160E+02  0.000E+00  0.000E+00  0.000E+00  1.180E+02  0.000E+00  0.000E+00   0.0E+00
    6   71  1.159E+02  0.000E+00  0.000E+00  0.000E+00  0.000E+00  1.860E+01  0.000E+00   0.0E+00
    6   72  1.145E+02  0.000E+00  0.000E+00  0.000E+00  6.330E+01  1.264E+00  0.000E+00   0.0E+00
    6   73  1.139E+02  0.000E+00  0.000E+00  0.000E+00  3.990E+02  0.000E+00  0.000E+00   0.0E+00
    6   74  1.136E+02  0.000E+00  0.000E+00  0.000E+00  0.000E+00  1.100E+00  0.000E+00   0.0E+00
    6   75  1.135E+02  0.000E+00  0.000E+00  0.000E+00  2.269E-01  2.916E+00  0.000E+00   0.0E+00
    6   76  1.127E+02  0.000E+00  0.000E+00  0.000E+00  0.000E+00  3.844E-01  0.000E+00   0.0E+00
    6   77  1.114E+02  0.000E+00  0.000E+00  0.000E+00  2.453E+02  6.386E-01  0.000E+00   0.0E+00
    6   78  1.079E+02  1.145E+08  3.998E-04  2.842E-04  0.000E+00  0.000E+00  3.083E+01   3.1E+00
    6   79  1.077E+02  3.507E+08  6.097E-04  4.323E-04  0.000E+00  0.000E+00  0.000E+00   2.0E+00
    6   80  1.068E+02  0.000E+00  0.000E+00  0.000E+00  0.000E+00  6.180E+00  0.000E+00   0.0E+00
    6   81  9.493E+01  3.078E+06  4.158E-06  2.599E-06  0.000E+00  0.000E+00  0.000E+00   2.4E+00
    6   82  9.455E+01  7.810E+06  2.093E-05  1.303E-05  0.000E+00  0.000E+00  1.664E-01   2.4E+00
    6   84  9.384E+01  0.000E+00  0.000E+00  0.000E+00  0.000E+00  0.000E+00  1.210E+00   0.0E+00
    6   86  9.269E+01  0.000E+00  0.000E+00  0.000E+00  0.000E+00  0.000E+00  2.002E+00   0.0E+00
    6   87  9.200E+01  5.372E+06  1.363E-05  8.256E-06  0.000E+00  0.000E+00  2.099E+00   2.8E+00
    6   89  9.084E+01  0.000E+00  0.000E+00  0.000E+00  2.265E+01  5.231E-01  0.000E+00   0.0E+00
    6   90  9.042E+01  7.133E+07  8.743E-05  5.205E-05  0.000E+00  0.000E+00  0.000E+00   2.6E+00
    6   91  9.023E+01  0.000E+00  0.000E+00  0.000E+00  1.003E+00  0.000E+00  0.000E+00   0.0E+00
    6   92  9.023E+01  0.000E+00  0.000E+00  0.000E+00  0.000E+00  0.000E+00  5.980E-01   0.0E+00
    6   93  9.010E+01  3.960E+07  9.640E-05  5.718E-05  0.000E+00  0.000E+00  2.031E-02   2.6E+00
    6   95  8.974E+01  0.000E+00  0.000E+00  0.000E+00  0.000E+00  0.000E+00  1.117E-01   0.0E+00
    6   96  8.925E+01  0.000E+00  0.000E+00  0.000E+00  0.000E+00  3.355E+00  0.000E+00   0.0E+00
    6   97  8.897E+01  0.000E+00  0.000E+00  0.000E+00  1.745E+01  9.059E-01  0.000E+00   0.0E+00
    6   98  8.892E+01  5.258E+05  1.247E-06  7.299E-07  0.000E+00  0.000E+00  3.543E-01   6.6E+00
    6   99  8.826E+01  0.000E+00  0.000E+00  0.000E+00  0.000E+00  0.000E+00  1.959E-01   0.0E+00
    6  100  8.733E+01  0.000E+00  0.000E+00  0.000E+00  0.000E+00  5.133E-01  0.000E+00   0.0E+00
    6  101  8.690E+01  1.249E+07  1.414E-05  8.090E-06  0.000E+00  0.000E+00  0.000E+00   2.4E+00
    6  102  8.545E+01  2.840E+07  6.218E-05  3.498E-05  0.000E+00  0.000E+00  6.119E-02   1.4E+00
    7    8  5.125E+03  0.000E+00  0.000E+00  0.000E+00  3.716E-04  9.290E+01  0.000E+00   0.0E+00
    7    9  1.499E+03  0.000E+00  0.000E+00  0.000E+00  4.126E-03  2.229E+02  0.000E+00   0.0E+00
    7   10  1.474E+03  0.000E+00  0.000E+00  0.000E+00  4.420E-02  1.195E+02  0.000E+00   0.0E+00
    7   11  7.623E+02  1.532E+07  2.002E-03  2.010E-02  0.000E+00  0.000E+00  2.611E-02   6.6E-01
    7   12  7.515E+02  5.891E+05  4.987E-05  4.936E-04  0.000E+00  0.000E+00  1.018E-02   3.3E+00
    7   13  6.850E+02  5.010E+07  1.762E-03  1.589E-02  0.000E+00  0.000E+00  3.677E-02   9.1E-01
    7   14  6.516E+02  0.000E+00  0.000E+00  0.000E+00  0.000E+00  0.000E+00  7.373E-02   0.0E+00
    7   15  6.318E+02  1.049E+08  9.413E-03  7.830E-02  0.000E+00  0.000E+00  6.303E-02   1.6E+00
    7   16  6.253E+02  0.000E+00  0.000E+00  0.000E+00  2.358E-01  6.347E+03  0.000E+00   0.0E+00
    7   17  5.725E+02  1.759E+09  4.322E-02  3.259E-01  0.000E+00  0.000E+00  4.532E-02   1.0E+00
    7   18  5.700E+02  9.342E+07  4.551E-03  3.416E-02  0.000E+00  0.000E+00  1.017E-06   1.2E+00
    7   19  5.570E+02  2.735E+07  6.362E-04  4.666E-03  0.000E+00  0.000E+00  1.238E-01   6.8E-01
    7   20  5.385E+02  2.627E+09  1.714E-01  1.215E+00  0.000E+00  0.000E+00  2.074E-01   1.2E+00
    7   21  5.330E+02  1.543E+09  6.573E-02  4.614E-01  0.000E+00  0.000E+00  4.397E-02   1.1E+00
    7   22  5.050E+02  2.986E+08  1.142E-02  7.593E-02  0.000E+00  0.000E+00  2.458E-01   6.8E-01
    7   23  4.913E+02  4.747E+08  8.588E-03  5.556E-02  0.000E+00  0.000E+00  5.816E-01   9.2E-01
    7   24  4.900E+02  2.211E+08  7.956E-03  5.133E-02  0.000E+00  0.000E+00  6.221E-01   9.4E-01
    7   25  4.093E+02  3.081E+06  1.161E-04  6.254E-04  0.000E+00  0.000E+00  2.369E-04   9.7E-01
    7   26  3.980E+02  0.000E+00  0.000E+00  0.000E+00  0.000E+00  0.000E+00  7.176E-03   0.0E+00
    7   27  3.724E+02  2.524E+08  5.248E-03  2.574E-02  0.000E+00  0.000E+00  1.035E-03   6.7E-01
    7   28  3.666E+02  2.967E+07  8.966E-04  4.328E-03  0.000E+00  0.000E+00  2.149E-02   4.6E-01
    7   29  3.118E+02  4.564E+09  6.650E-02  2.730E-01  0.000E+00  0.000E+00  2.724E-01   7.5E-01
    7   30  3.081E+02  4.435E+08  3.156E-03  1.281E-02  0.000E+00  0.000E+00  1.444E+00   8.0E-01
    7   31  2.809E+02  4.472E+08  5.288E-03  1.956E-02  0.000E+00  0.000E+00  2.324E-02   9.9E-01
    7   32  2.706E+02  8.396E+08  4.608E-03  1.642E-02  0.000E+00  0.000E+00  3.082E+00   8.3E-01
    7   33  2.699E+02  0.000E+00  0.000E+00  0.000E+00  1.162E+03  0.000E+00  0.000E+00   0.0E+00
    7   34  2.690E+02  0.000E+00  0.000E+00  0.000E+00  1.709E-01  2.555E-05  0.000E+00   0.0E+00
    7   35  2.663E+02  0.000E+00  0.000E+00  0.000E+00  1.311E+03  2.780E-01  0.000E+00   0.0E+00
    7   36  2.626E+02  0.000E+00  0.000E+00  0.000E+00  3.984E+03  3.763E+00  0.000E+00   0.0E+00
    7   38  2.499E+02  0.000E+00  0.000E+00  0.000E+00  4.878E+03  0.000E+00  0.000E+00   0.0E+00
    7   39  2.452E+02  0.000E+00  0.000E+00  0.000E+00  1.504E+03  6.606E-01  0.000E+00   0.0E+00
    7   40  2.410E+02  0.000E+00  0.000E+00  0.000E+00  1.363E+03  6.134E-01  0.000E+00   0.0E+00
    7   41  2.408E+02  0.000E+00  0.000E+00  0.000E+00  1.879E+03  1.854E-01  0.000E+00   0.0E+00
    7   42  2.372E+02  0.000E+00  0.000E+00  0.000E+00  1.177E+05  3.339E+00  0.000E+00   0.0E+00
    7   43  2.366E+02  0.000E+00  0.000E+00  0.000E+00  1.241E+03  4.275E-01  0.000E+00   0.0E+00
    7   44  2.367E+02  0.000E+00  0.000E+00  0.000E+00  1.366E+05  0.000E+00  0.000E+00   0.0E+00
    7   45  2.351E+02  0.000E+00  0.000E+00  0.000E+00  7.316E+03  2.503E+00  0.000E+00   0.0E+00
    7   46  2.316E+02  0.000E+00  0.000E+00  0.000E+00  1.319E+05  6.314E+00  0.000E+00   0.0E+00
    7   47  2.299E+02  0.000E+00  0.000E+00  0.000E+00  1.061E+05  1.055E+00  0.000E+00   0.0E+00
    7   48  2.233E+02  0.000E+00  0.000E+00  0.000E+00  2.454E+03  7.049E-01  0.000E+00   0.0E+00
    7   49  2.205E+02  0.000E+00  0.000E+00  0.000E+00  4.286E+04  1.305E-01  0.000E+00   0.0E+00
    7   50  2.070E+02  0.000E+00  0.000E+00  0.000E+00  6.994E+00  0.000E+00  0.000E+00   0.0E+00
    7   52  1.982E+02  0.000E+00  0.000E+00  0.000E+00  4.056E+03  5.379E+01  0.000E+00   0.0E+00
    7   53  1.972E+02  0.000E+00  0.000E+00  0.000E+00  1.456E+04  1.549E+00  0.000E+00   0.0E+00
    7   54  1.958E+02  0.000E+00  0.000E+00  0.000E+00  1.907E+03  0.000E+00  0.000E+00   0.0E+00
    7   55  1.916E+02  0.000E+00  0.000E+00  0.000E+00  6.162E+04  2.358E+00  0.000E+00   0.0E+00
    7   56  1.908E+02  0.000E+00  0.000E+00  0.000E+00  6.179E+04  6.879E+00  0.000E+00   0.0E+00
    7   57  1.866E+02  0.000E+00  0.000E+00  0.000E+00  2.110E+04  9.118E-03  0.000E+00   0.0E+00
    7   58  1.866E+02  0.000E+00  0.000E+00  0.000E+00  6.140E+04  9.559E+00  0.000E+00   0.0E+00
    7   59  1.684E+02  0.000E+00  0.000E+00  0.000E+00  4.016E+03  1.161E+00  0.000E+00   0.0E+00
    7   60  1.665E+02  0.000E+00  0.000E+00  0.000E+00  5.776E+03  2.118E+00  0.000E+00   0.0E+00
    7   61  1.549E+02  3.903E+09  2.106E-02  4.296E-02  0.000E+00  0.000E+00  1.071E+01   8.2E-01
    7   62  1.507E+02  1.004E+08  3.421E-04  6.790E-04  0.000E+00  0.000E+00  7.907E-01   8.5E-01
    7   63  1.473E+02  8.725E+09  1.419E-02  2.754E-02  0.000E+00  0.000E+00  1.169E+01   8.5E-01
    7   64  1.427E+02  1.863E+10  5.687E-02  1.069E-01  0.000E+00  0.000E+00  3.630E+01   8.3E-01
    7   65  1.383E+02  1.343E+10  1.927E-02  3.511E-02  0.000E+00  0.000E+00  4.285E+01   8.2E-01
    7   66  1.239E+02  0.000E+00  0.000E+00  0.000E+00  1.190E+01  4.858E+00  0.000E+00   0.0E+00
    7   67  1.201E+02  0.000E+00  0.000E+00  0.000E+00  1.258E+02  0.000E+00  0.000E+00   0.0E+00
    7   68  1.200E+02  0.000E+00  0.000E+00  0.000E+00  1.153E+03  1.501E-01  0.000E+00   0.0E+00
    7   69  1.186E+02  0.000E+00  0.000E+00  0.000E+00  4.754E+02  5.413E-01  0.000E+00   0.0E+00
    7   70  1.172E+02  0.000E+00  0.000E+00  0.000E+00  2.272E+03  4.223E+00  0.000E+00   0.0E+00
    7   71  1.171E+02  0.000E+00  0.000E+00  0.000E+00  8.591E+00  5.181E+00  0.000E+00   0.0E+00
    7   72  1.156E+02  0.000E+00  0.000E+00  0.000E+00  2.521E+03  1.303E+00  0.000E+00   0.0E+00
    7   73  1.151E+02  0.000E+00  0.000E+00  0.000E+00  3.217E+03  8.360E-01  0.000E+00   0.0E+00
    7   74  1.147E+02  0.000E+00  0.000E+00  0.000E+00  6.284E+02  1.560E+00  0.000E+00   0.0E+00
    7   75  1.147E+02  0.000E+00  0.000E+00  0.000E+00  1.116E+03  9.233E-01  0.000E+00   0.0E+00
    7   76  1.138E+02  0.000E+00  0.000E+00  0.000E+00  2.249E+03  1.473E+01  0.000E+00   0.0E+00
    7   77  1.126E+02  0.000E+00  0.000E+00  0.000E+00  9.917E+02  3.385E+00  0.000E+00   0.0E+00
    7   78  1.090E+02  2.031E+07  3.616E-05  5.188E-05  0.000E+00  0.000E+00  1.848E+02   2.0E+00
    7   79  1.087E+02  3.886E+09  3.443E-03  4.929E-03  0.000E+00  0.000E+00  4.202E+00   5.8E-01
    7   80  1.078E+02  0.000E+00  0.000E+00  0.000E+00  8.101E+00  2.526E+01  0.000E+00   0.0E+00
    7   81  9.573E+01  1.130E+07  7.760E-06  9.783E-06  0.000E+00  0.000E+00  5.548E-01   2.7E+00
    7   82  9.534E+01  4.022E+06  5.482E-06  6.882E-06  0.000E+00  0.000E+00  5.720E-01   2.6E+00
    7   84  9.462E+01  3.525E+05  7.098E-07  8.845E-07  0.000E+00  0.000E+00  8.658E-03   3.4E-01
    7   85  9.425E+01  0.000E+00  0.000E+00  0.000E+00  0.000E+00  0.000E+00  7.052E-04   0.0E+00
    7   86  9.346E+01  6.698E+06  1.315E-05  1.619E-05  0.000E+00  0.000E+00  8.422E-01   6.5E-02
    7   87  9.275E+01  2.453E+06  3.163E-06  3.863E-06  0.000E+00  0.000E+00  1.625E-01   1.8E-03
    7   88  9.217E+01  0.000E+00  0.000E+00  0.000E+00  0.000E+00  0.000E+00  2.449E-01   0.0E+00
    7   89  9.157E+01  0.000E+00  0.000E+00  0.000E+00  1.277E+03  1.281E+00  0.000E+00   0.0E+00
    7   90  9.115E+01  4.520E+04  2.815E-08  3.378E-08  0.000E+00  0.000E+00  5.672E-01   8.2E+01
    7   91  9.096E+01  0.000E+00  0.000E+00  0.000E+00  2.356E+03  1.551E+00  0.000E+00   0.0E+00
    7   92  9.096E+01  7.439E+06  1.384E-05  1.658E-05  0.000E+00  0.000E+00  7.128E-02   4.0E+00
    7   93  9.082E+01  2.712E+06  3.353E-06  4.010E-06  0.000E+00  0.000E+00  2.606E-02   7.5E+00
    7   94  9.077E+01  0.000E+00  0.000E+00  0.000E+00  0.000E+00  0.000E+00  3.372E+00   0.0E+00
    7   95  9.045E+01  2.746E+08  5.051E-04  6.017E-04  0.000E+00  0.000E+00  8.722E-02   5.8E-01
    7   96  8.995E+01  0.000E+00  0.000E+00  0.000E+00  1.963E+03  6.502E+00  0.000E+00   0.0E+00
    7   97  8.967E+01  0.000E+00  0.000E+00  0.000E+00  8.097E+02  6.232E-01  0.000E+00   0.0E+00
    7   98  8.962E+01  1.899E+08  2.287E-04  2.699E-04  0.000E+00  0.000E+00  9.331E-02   5.8E-01
    7   99  8.895E+01  2.381E+08  4.237E-04  4.963E-04  0.000E+00  0.000E+00  1.607E+00   9.1E-01
    7  100  8.800E+01  0.000E+00  0.000E+00  0.000E+00  8.084E-01  3.264E-01  0.000E+00   0.0E+00
    7  101  8.757E+01  1.381E+08  7.940E-05  9.156E-05  0.000E+00  0.000E+00  1.631E+00   5.0E-01
    7  102  8.610E+01  1.816E+08  2.018E-04  2.288E-04  0.000E+00  0.000E+00  4.355E+00   3.7E-01
    8    9  2.119E+03  0.000E+00  0.000E+00  0.000E+00  2.482E-04  0.000E+00  0.000E+00   0.0E+00
    8   10  2.069E+03  0.000E+00  0.000E+00  0.000E+00  9.380E-04  4.538E+01  0.000E+00   0.0E+00
    8   11  8.955E+02  0.000E+00  0.000E+00  0.000E+00  0.000E+00  0.000E+00  1.188E-03   0.0E+00
    8   12  8.806E+02  3.585E+03  8.335E-07  4.833E-06  0.000E+00  0.000E+00  7.297E-03   5.9E+00
    8   13  7.907E+02  1.348E+07  1.263E-03  6.575E-03  0.000E+00  0.000E+00  0.000E+00   1.3E+00
    8   15  7.206E+02  0.000E+00  0.000E+00  0.000E+00  0.000E+00  0.000E+00  8.179E-03   0.0E+00
    8   16  7.121E+02  0.000E+00  0.000E+00  0.000E+00  0.000E+00  2.288E+03  0.000E+00   0.0E+00
    8   17  6.445E+02  8.496E+07  5.291E-03  2.245E-02  0.000E+00  0.000E+00  0.000E+00   1.3E+00
    8   18  6.413E+02  8.409E+07  1.037E-02  4.380E-02  0.000E+00  0.000E+00  3.934E-02   1.3E+00
    8   19  6.250E+02  2.402E+07  1.407E-03  5.788E-03  0.000E+00  0.000E+00  0.000E+00   9.4E-01
    8   20  6.018E+02  0.000E+00  0.000E+00  0.000E+00  0.000E+00  0.000E+00  1.722E-01   0.0E+00
    8   21  5.949E+02  5.611E+07  5.955E-03  2.332E-02  0.000E+00  0.000E+00  1.322E-05   1.4E+00
    8   22  5.603E+02  2.873E+08  2.704E-02  9.973E-02  0.000E+00  0.000E+00  2.960E-01   1.2E+00
    8   23  5.433E+02  1.782E+09  7.885E-02  2.821E-01  0.000E+00  0.000E+00  0.000E+00   1.0E+00
    8   24  5.417E+02  1.991E+09  1.752E-01  6.249E-01  0.000E+00  0.000E+00  1.662E-04   1.2E+00
    8   25  4.448E+02  0.000E+00  0.000E+00  0.000E+00  0.000E+00  0.000E+00  1.043E-06   0.0E+00
    8   27  4.016E+02  4.905E+06  2.372E-04  6.272E-04  0.000E+00  0.000E+00  4.615E-04   5.3E-03
    8   28  3.948E+02  0.000E+00  0.000E+00  0.000E+00  0.000E+00  0.000E+00  7.826E-03   0.0E+00
    8   29  3.320E+02  1.481E+09  4.894E-02  1.070E-01  0.000E+00  0.000E+00  3.080E-01   8.0E-01
    8   30  3.279E+02  2.291E+09  3.692E-02  7.969E-02  0.000E+00  0.000E+00  0.000E+00   7.5E-01
    8   31  2.971E+02  1.948E+08  5.156E-03  1.009E-02  0.000E+00  0.000E+00  1.115E-01   8.1E-01
    8   32  2.856E+02  3.024E+09  3.700E-02  6.958E-02  0.000E+00  0.000E+00  0.000E+00   7.9E-01
    8   34  2.839E+02  0.000E+00  0.000E+00  0.000E+00  3.155E+00  0.000E+00  0.000E+00   0.0E+00
    8   35  2.808E+02  0.000E+00  0.000E+00  0.000E+00  8.236E+01  1.873E-01  0.000E+00   0.0E+00
    8   36  2.768E+02  0.000E+00  0.000E+00  0.000E+00  0.000E+00  4.707E-01  0.000E+00   0.0E+00
    8   39  2.576E+02  0.000E+00  0.000E+00  0.000E+00  0.000E+00  2.186E+00  0.000E+00   0.0E+00
    8   40  2.529E+02  0.000E+00  0.000E+00  0.000E+00  3.612E+03  0.000E+00  0.000E+00   0.0E+00
    8   41  2.526E+02  0.000E+00  0.000E+00  0.000E+00  3.031E+03  1.816E-03  0.000E+00   0.0E+00
    8   42  2.487E+02  0.000E+00  0.000E+00  0.000E+00  0.000E+00  8.476E-02  0.000E+00   0.0E+00
    8   43  2.481E+02  0.000E+00  0.000E+00  0.000E+00  8.468E+02  5.763E-03  0.000E+00   0.0E+00
    8   45  2.464E+02  0.000E+00  0.000E+00  0.000E+00  3.255E+03  0.000E+00  0.000E+00   0.0E+00
    8   46  2.426E+02  0.000E+00  0.000E+00  0.000E+00  6.542E+03  2.616E-01  0.000E+00   0.0E+00
    8   47  2.407E+02  0.000E+00  0.000E+00  0.000E+00  3.582E+04  0.000E+00  0.000E+00   0.0E+00
    8   48  2.334E+02  0.000E+00  0.000E+00  0.000E+00  1.004E+05  6.998E+00  0.000E+00   0.0E+00
    8   49  2.304E+02  0.000E+00  0.000E+00  0.000E+00  1.014E+05  0.000E+00  0.000E+00   0.0E+00
    8   52  2.062E+02  0.000E+00  0.000E+00  0.000E+00  0.000E+00  1.635E+01  0.000E+00   0.0E+00
    8   53  2.051E+02  0.000E+00  0.000E+00  0.000E+00  1.179E+00  0.000E+00  0.000E+00   0.0E+00
    8   55  1.990E+02  0.000E+00  0.000E+00  0.000E+00  5.798E+04  4.099E-01  0.000E+00   0.0E+00
    8   56  1.982E+02  0.000E+00  0.000E+00  0.000E+00  3.673E+04  0.000E+00  0.000E+00   0.0E+00
    8   57  1.936E+02  0.000E+00  0.000E+00  0.000E+00  6.401E+04  1.059E+00  0.000E+00   0.0E+00
    8   58  1.937E+02  0.000E+00  0.000E+00  0.000E+00  0.000E+00  7.577E-01  0.000E+00   0.0E+00
    8   59  1.742E+02  0.000E+00  0.000E+00  0.000E+00  3.209E+03  0.000E+00  0.000E+00   0.0E+00
    8   60  1.721E+02  0.000E+00  0.000E+00  0.000E+00  2.123E+04  1.765E+00  0.000E+00   0.0E+00
    8   61  1.597E+02  0.000E+00  0.000E+00  0.000E+00  0.000E+00  0.000E+00  1.002E+01   0.0E+00
    8   62  1.553E+02  1.037E+08  7.499E-04  7.668E-04  0.000E+00  0.000E+00  3.928E+00   7.2E-01
    8   63  1.517E+02  7.130E+08  2.459E-03  2.456E-03  0.000E+00  0.000E+00  0.000E+00   8.4E-01
    8   64  1.468E+02  4.195E+09  2.710E-02  2.619E-02  0.000E+00  0.000E+00  2.523E+01   8.3E-01
    8   65  1.422E+02  2.085E+10  6.319E-02  5.915E-02  0.000E+00  0.000E+00  0.000E+00   8.4E-01
    8   66  1.270E+02  0.000E+00  0.000E+00  0.000E+00  6.863E-02  6.228E-01  0.000E+00   0.0E+00
    8   68  1.229E+02  0.000E+00  0.000E+00  0.000E+00  4.290E+02  0.000E+00  0.000E+00   0.0E+00
    8   69  1.214E+02  0.000E+00  0.000E+00  0.000E+00  3.466E+01  5.458E-01  0.000E+00   0.0E+00
    8   70  1.199E+02  0.000E+00  0.000E+00  0.000E+00  1.559E+03  0.000E+00  0.000E+00   0.0E+00
    8   71  1.199E+02  0.000E+00  0.000E+00  0.000E+00  0.000E+00  2.994E-04  0.000E+00   0.0E+00
    8   72  1.183E+02  0.000E+00  0.000E+00  0.000E+00  9.520E+02  2.940E-01  0.000E+00   0.0E+00
    8   73  1.177E+02  0.000E+00  0.000E+00  0.000E+00  1.209E+03  0.000E+00  0.000E+00   0.0E+00
    8   74  1.173E+02  0.000E+00  0.000E+00  0.000E+00  0.000E+00  1.619E-01  0.000E+00   0.0E+00
    8   75  1.173E+02  0.000E+00  0.000E+00  0.000E+00  7.501E+02  8.722E-01  0.000E+00   0.0E+00
    8   76  1.164E+02  0.000E+00  0.000E+00  0.000E+00  0.000E+00  5.211E+00  0.000E+00   0.0E+00
    8   77  1.151E+02  0.000E+00  0.000E+00  0.000E+00  4.702E+03  2.836E+00  0.000E+00   0.0E+00
    8   78  1.113E+02  1.342E+08  4.985E-04  3.654E-04  0.000E+00  0.000E+00  5.208E+01   2.9E+00
    8   79  1.111E+02  2.637E+08  4.878E-04  3.568E-04  0.000E+00  0.000E+00  0.000E+00   1.9E+00
    8   80  1.101E+02  0.000E+00  0.000E+00  0.000E+00  0.000E+00  2.330E+01  0.000E+00   0.0E+00
    8   81  9.755E+01  4.248E+03  6.061E-09  3.893E-09  0.000E+00  0.000E+00  0.000E+00   1.3E-01
    8   82  9.715E+01  2.008E+05  5.682E-07  3.635E-07  0.000E+00  0.000E+00  7.929E-01   1.3E+00
    8   84  9.640E+01  0.000E+00  0.000E+00  0.000E+00  0.000E+00  0.000E+00  4.924E-02   0.0E+00
    8   86  9.519E+01  0.000E+00  0.000E+00  0.000E+00  0.000E+00  0.000E+00  1.152E-01   0.0E+00
    8   87  9.445E+01  1.528E+07  4.089E-05  2.543E-05  0.000E+00  0.000E+00  2.188E-01   7.7E-01
    8   89  9.324E+01  0.000E+00  0.000E+00  0.000E+00  1.427E+03  7.626E-01  0.000E+00   0.0E+00
    8   90  9.280E+01  2.099E+06  2.710E-06  1.656E-06  0.000E+00  0.000E+00  0.000E+00   1.1E-01
    8   91  9.260E+01  0.000E+00  0.000E+00  0.000E+00  7.915E+02  0.000E+00  0.000E+00   0.0E+00
    8   92  9.260E+01  0.000E+00  0.000E+00  0.000E+00  0.000E+00  0.000E+00  3.865E-01   0.0E+00
    8   93  9.246E+01  3.782E+05  9.692E-07  5.900E-07  0.000E+00  0.000E+00  5.893E-01   1.6E+00
    8   95  9.208E+01  0.000E+00  0.000E+00  0.000E+00  0.000E+00  0.000E+00  1.440E-01   0.0E+00
    8   96  9.156E+01  0.000E+00  0.000E+00  0.000E+00  0.000E+00  3.672E-01  0.000E+00   0.0E+00
    8   97  9.126E+01  0.000E+00  0.000E+00  0.000E+00  2.350E+03  4.580E+00  0.000E+00   0.0E+00
    8   98  9.122E+01  3.926E+08  9.795E-04  5.883E-04  0.000E+00  0.000E+00  2.509E-03   7.0E-01
    8   99  9.053E+01  0.000E+00  0.000E+00  0.000E+00  0.000E+00  0.000E+00  2.941E+00   0.0E+00
    8  100  8.954E+01  0.000E+00  0.000E+00  0.000E+00  0.000E+00  3.143E+00  0.000E+00   0.0E+00
    8  101  8.909E+01  3.809E+08  4.532E-04  2.658E-04  0.000E+00  0.000E+00  0.000E+00   5.1E-01
    8  102  8.757E+01  1.605E+08  3.690E-04  2.127E-04  0.000E+00  0.000E+00  1.219E+00   3.7E-01
    9   10  8.797E+04  0.000E+00  0.000E+00  0.000E+00  2.002E-10  2.253E-02  0.000E+00   0.0E+00
    9   11  1.551E+03  9.902E+04  3.570E-05  1.093E-03  0.000E+00  0.000E+00  2.096E-06   3.6E+00
    9   12  1.507E+03  5.788E+05  1.313E-04  3.909E-03  0.000E+00  0.000E+00  2.046E-05   1.5E+00
    9   13  1.261E+03  0.000E+00  0.000E+00  0.000E+00  0.000E+00  0.000E+00  3.260E-04   0.0E+00
    9   14  1.152E+03  1.276E+05  3.390E-05  7.716E-04  0.000E+00  0.000E+00  2.228E-06   6.7E+00
    9   15  1.092E+03  3.706E+04  6.624E-06  1.429E-04  0.000E+00  0.000E+00  6.049E-05   4.7E+01
    9   16  1.073E+03  0.000E+00  0.000E+00  0.000E+00  3.663E+00  0.000E+00  0.000E+00   0.0E+00
    9   17  9.262E+02  0.000E+00  0.000E+00  0.000E+00  0.000E+00  0.000E+00  1.623E-02   0.0E+00
    9   18  9.197E+02  8.856E+05  7.487E-05  1.360E-03  0.000E+00  0.000E+00  1.652E-04   3.4E-01
    9   19  8.863E+02  0.000E+00  0.000E+00  0.000E+00  0.000E+00  0.000E+00  5.611E-04   0.0E+00
    9   20  8.405E+02  8.704E+05  9.217E-05  1.530E-03  0.000E+00  0.000E+00  3.195E-04   3.8E+00
    9   21  8.271E+02  1.946E+08  1.331E-02  2.174E-01  0.000E+00  0.000E+00  1.924E-02   1.1E+00
    9   22  7.616E+02  2.222E+07  1.288E-03  1.938E-02  0.000E+00  0.000E+00  1.869E-03   1.0E+00
    9   23  7.307E+02  0.000E+00  0.000E+00  0.000E+00  0.000E+00  0.000E+00  3.528E-02   0.0E+00
    9   24  7.278E+02  1.082E+08  5.729E-03  8.236E-02  0.000E+00  0.000E+00  4.755E-03   1.0E+00
    9   25  5.629E+02  4.462E+08  2.120E-02  2.357E-01  0.000E+00  0.000E+00  5.645E-02   1.2E+00
    9   26  5.418E+02  2.801E+09  1.644E-01  1.759E+00  0.000E+00  0.000E+00  4.152E-01   1.3E+00
    9   27  4.955E+02  6.301E+07  1.546E-03  1.513E-02  0.000E+00  0.000E+00  9.730E-01   1.0E+00
    9   28  4.852E+02  3.268E+09  1.153E-01  1.105E+00  0.000E+00  0.000E+00  1.017E+00   8.7E-01
    9   29  3.936E+02  4.322E+09  6.694E-02  5.204E-01  0.000E+00  0.000E+00  6.786E-01   6.7E-01
    9   30  3.879E+02  0.000E+00  0.000E+00  0.000E+00  0.000E+00  0.000E+00  3.036E+00   0.0E+00
    9   31  3.456E+02  6.422E+05  7.666E-06  5.233E-05  0.000E+00  0.000E+00  2.420E-06   5.6E+00
    9   32  3.302E+02  0.000E+00  0.000E+00  0.000E+00  0.000E+00  0.000E+00  2.250E+00   0.0E+00
    9   33  3.291E+02  0.000E+00  0.000E+00  0.000E+00  2.905E+01  2.171E+00  0.000E+00   0.0E+00
    9   34  3.279E+02  0.000E+00  0.000E+00  0.000E+00  3.289E+00  1.745E+00  0.000E+00   0.0E+00
    9   35  3.238E+02  0.000E+00  0.000E+00  0.000E+00  2.392E+01  2.094E+00  0.000E+00   0.0E+00
    9   36  3.184E+02  0.000E+00  0.000E+00  0.000E+00  7.038E+01  0.000E+00  0.000E+00   0.0E+00
    9   37  3.082E+02  0.000E+00  0.000E+00  0.000E+00  5.006E+01  0.000E+00  0.000E+00   0.0E+00
    9   38  2.999E+02  0.000E+00  0.000E+00  0.000E+00  9.515E+00  1.025E+00  0.000E+00   0.0E+00
    9   39  2.932E+02  0.000E+00  0.000E+00  0.000E+00  1.629E+01  0.000E+00  0.000E+00   0.0E+00
    9   40  2.872E+02  0.000E+00  0.000E+00  0.000E+00  1.996E+02  7.038E-02  0.000E+00   0.0E+00
    9   41  2.868E+02  0.000E+00  0.000E+00  0.000E+00  3.269E+02  1.418E+00  0.000E+00   0.0E+00
    9   42  2.818E+02  0.000E+00  0.000E+00  0.000E+00  3.580E+03  0.000E+00  0.000E+00   0.0E+00
    9   43  2.810E+02  0.000E+00  0.000E+00  0.000E+00  3.995E+01  1.187E+00  0.000E+00   0.0E+00
    9   44  2.811E+02  0.000E+00  0.000E+00  0.000E+00  1.311E+02  2.795E+00  0.000E+00   0.0E+00
    9   45  2.788E+02  0.000E+00  0.000E+00  0.000E+00  7.367E+02  1.763E+00  0.000E+00   0.0E+00
    9   46  2.739E+02  0.000E+00  0.000E+00  0.000E+00  8.586E+03  6.496E+00  0.000E+00   0.0E+00
    9   47  2.716E+02  0.000E+00  0.000E+00  0.000E+00  6.970E+02  3.648E-01  0.000E+00   0.0E+00
    9   48  2.623E+02  0.000E+00  0.000E+00  0.000E+00  8.170E+03  1.353E-02  0.000E+00   0.0E+00
    9   49  2.585E+02  0.000E+00  0.000E+00  0.000E+00  1.570E+04  8.560E-02  0.000E+00   0.0E+00
    9   50  2.401E+02  0.000E+00  0.000E+00  0.000E+00  2.005E+04  2.390E-02  0.000E+00   0.0E+00
    9   51  2.398E+02  0.000E+00  0.000E+00  0.000E+00  1.366E+05  0.000E+00  0.000E+00   0.0E+00
    9   52  2.285E+02  0.000E+00  0.000E+00  0.000E+00  1.517E+05  0.000E+00  0.000E+00   0.0E+00
    9   53  2.271E+02  0.000E+00  0.000E+00  0.000E+00  6.514E+02  7.771E-01  0.000E+00   0.0E+00
    9   54  2.252E+02  0.000E+00  0.000E+00  0.000E+00  1.548E+05  4.431E-01  0.000E+00   0.0E+00
    9   55  2.196E+02  0.000E+00  0.000E+00  0.000E+00  1.398E+05  2.175E-01  0.000E+00   0.0E+00
    9   56  2.186E+02  0.000E+00  0.000E+00  0.000E+00  1.734E+05  2.979E-01  0.000E+00   0.0E+00
    9   57  2.131E+02  0.000E+00  0.000E+00  0.000E+00  4.204E+04  7.000E+00  0.000E+00   0.0E+00
    9   58  2.131E+02  0.000E+00  0.000E+00  0.000E+00  4.151E+04  0.000E+00  0.000E+00   0.0E+00
    9   59  1.898E+02  0.000E+00  0.000E+00  0.000E+00  6.628E+03  1.957E-01  0.000E+00   0.0E+00
    9   60  1.873E+02  0.000E+00  0.000E+00  0.000E+00  2.345E+03  3.254E+00  0.000E+00   0.0E+00
    9   61  1.728E+02  6.156E+08  2.754E-03  9.398E-03  0.000E+00  0.000E+00  1.035E+01   7.9E-01
    9   62  1.676E+02  2.298E+05  6.452E-07  2.136E-06  0.000E+00  0.000E+00  1.284E+01   3.3E+01
    9   63  1.634E+02  0.000E+00  0.000E+00  0.000E+00  0.000E+00  0.000E+00  6.014E+00   0.0E+00
    9   64  1.577E+02  8.781E+08  2.183E-03  6.800E-03  0.000E+00  0.000E+00  2.213E+01   9.8E-01
    9   65  1.524E+02  0.000E+00  0.000E+00  0.000E+00  0.000E+00  0.000E+00  5.131E+01   0.0E+00
    9   66  1.351E+02  0.000E+00  0.000E+00  0.000E+00  1.003E+01  8.304E-02  0.000E+00   0.0E+00
    9   67  1.306E+02  0.000E+00  0.000E+00  0.000E+00  3.687E+01  1.081E+01  0.000E+00   0.0E+00
    9   68  1.304E+02  0.000E+00  0.000E+00  0.000E+00  2.841E+02  5.055E+00  0.000E+00   0.0E+00
    9   69  1.288E+02  0.000E+00  0.000E+00  0.000E+00  2.773E+02  3.202E+00  0.000E+00   0.0E+00
    9   70  1.271E+02  0.000E+00  0.000E+00  0.000E+00  3.711E+02  5.771E+00  0.000E+00   0.0E+00
    9   71  1.271E+02  0.000E+00  0.000E+00  0.000E+00  1.023E+02  0.000E+00  0.000E+00   0.0E+00
    9   72  1.253E+02  0.000E+00  0.000E+00  0.000E+00  8.555E+02  6.137E+00  0.000E+00   0.0E+00
    9   73  1.247E+02  0.000E+00  0.000E+00  0.000E+00  5.135E+02  1.817E+00  0.000E+00   0.0E+00
    9   74  1.242E+02  0.000E+00  0.000E+00  0.000E+00  1.832E+02  0.000E+00  0.000E+00   0.0E+00
    9   75  1.242E+02  0.000E+00  0.000E+00  0.000E+00  2.898E+02  5.303E+00  0.000E+00   0.0E+00
    9   76  1.232E+02  0.000E+00  0.000E+00  0.000E+00  2.687E+03  0.000E+00  0.000E+00   0.0E+00
    9   77  1.217E+02  0.000E+00  0.000E+00  0.000E+00  1.468E+01  1.789E+00  0.000E+00   0.0E+00
    9   78  1.175E+02  1.153E+11  1.591E-01  3.692E-01  0.000E+00  0.000E+00  4.221E+00   5.6E-01
    9   79  1.172E+02  0.000E+00  0.000E+00  0.000E+00  0.000E+00  0.000E+00  1.869E+01   0.0E+00
    9   80  1.162E+02  0.000E+00  0.000E+00  0.000E+00  1.261E+04  0.000E+00  0.000E+00   0.0E+00
    9   81  1.023E+02  0.000E+00  0.000E+00  0.000E+00  0.000E+00  0.000E+00  1.525E-01   0.0E+00
    9   82  1.018E+02  2.711E+06  2.809E-06  5.650E-06  0.000E+00  0.000E+00  3.672E-02   1.3E+00
    9   83  1.013E+02  0.000E+00  0.000E+00  0.000E+00  0.000E+00  0.000E+00  6.642E-01   0.0E+00
    9   84  1.010E+02  7.050E+05  1.078E-06  2.151E-06  0.000E+00  0.000E+00  2.848E-02   2.3E+00
    9   85  1.006E+02  1.460E+06  2.952E-06  5.865E-06  0.000E+00  0.000E+00  2.146E-02   8.3E-02
    9   86  9.967E+01  1.826E+06  2.720E-06  5.354E-06  0.000E+00  0.000E+00  2.645E-03   8.5E-02
    9   87  9.886E+01  1.290E+06  1.260E-06  2.460E-06  0.000E+00  0.000E+00  5.184E-02   6.1E-01
    9   88  9.821E+01  3.684E+07  7.103E-05  1.378E-04  0.000E+00  0.000E+00  1.869E-01   1.7E-01
    9   89  9.753E+01  0.000E+00  0.000E+00  0.000E+00  1.528E+03  9.187E+00  0.000E+00   0.0E+00
    9   90  9.705E+01  0.000E+00  0.000E+00  0.000E+00  0.000E+00  0.000E+00  2.368E-02   0.0E+00
    9   91  9.683E+01  0.000E+00  0.000E+00  0.000E+00  1.863E+03  8.288E-04  0.000E+00   0.0E+00
    9   92  9.683E+01  3.664E+05  5.151E-07  9.851E-07  0.000E+00  0.000E+00  3.813E-02   6.2E-01
    9   93  9.667E+01  3.175E+06  2.966E-06  5.663E-06  0.000E+00  0.000E+00  3.199E-03   9.0E-01
    9   94  9.662E+01  5.913E+07  1.103E-04  2.106E-04  0.000E+00  0.000E+00  3.334E-01   6.6E-02
    9   95  9.626E+01  2.298E+07  3.192E-05  6.069E-05  0.000E+00  0.000E+00  7.405E-02   6.8E-02
    9   96  9.569E+01  0.000E+00  0.000E+00  0.000E+00  1.046E+03  0.000E+00  0.000E+00   0.0E+00
    9   97  9.537E+01  0.000E+00  0.000E+00  0.000E+00  1.638E+03  2.021E+00  0.000E+00   0.0E+00
    9   98  9.532E+01  8.455E+06  7.679E-06  1.446E-05  0.000E+00  0.000E+00  5.232E-02   4.5E-01
    9   99  9.456E+01  1.650E+06  2.212E-06  4.133E-06  0.000E+00  0.000E+00  1.156E-05   2.4E-01
    9  100  9.349E+01  0.000E+00  0.000E+00  0.000E+00  8.693E-01  0.000E+00  0.000E+00   0.0E+00
    9  101  9.300E+01  0.000E+00  0.000E+00  0.000E+00  0.000E+00  0.000E+00  1.403E-01   0.0E+00
    9  102  9.134E+01  5.187E+07  4.325E-05  7.804E-05  0.000E+00  0.000E+00  5.968E-04   1.3E+00
   10   11  1.579E+03  8.148E+03  4.566E-06  9.492E-05  0.000E+00  0.000E+00  2.065E-05   1.1E+01
   10   12  1.533E+03  2.439E+05  8.593E-05  1.735E-03  0.000E+00  0.000E+00  2.386E-05   3.6E+00
   10   13  1.280E+03  2.528E+06  3.102E-04  5.227E-03  0.000E+00  0.000E+00  3.875E-05   1.2E+00
   10   14  1.168E+03  0.000E+00  0.000E+00  0.000E+00  0.000E+00  0.000E+00  1.286E-05   0.0E+00
   10   15  1.106E+03  6.511E+03  1.790E-06  2.605E-05  0.000E+00  0.000E+00  3.844E-06   7.6E+01
   10   16  1.086E+03  0.000E+00  0.000E+00  0.000E+00  2.103E+00  3.971E+00  0.000E+00   0.0E+00
   10   17  9.361E+02  6.183E+07  4.061E-03  5.006E-02  0.000E+00  0.000E+00  4.687E-04   1.1E+00
   10   18  9.294E+02  3.748E+05  4.854E-05  5.941E-04  0.000E+00  0.000E+00  3.984E-05   7.0E+00
   10   19  8.953E+02  1.434E+06  8.614E-05  1.016E-03  0.000E+00  0.000E+00  3.489E-05   2.2E-01
   10   20  8.486E+02  2.584E+04  4.184E-06  4.675E-05  0.000E+00  0.000E+00  3.289E-04   2.1E-04
   10   21  8.350E+02  2.581E+07  2.698E-03  2.967E-02  0.000E+00  0.000E+00  3.126E-03   1.8E+00
   10   22  7.683E+02  6.119E+05  5.415E-05  5.478E-04  0.000E+00  0.000E+00  1.613E-05   1.4E-01
   10   23  7.368E+02  1.506E+08  6.128E-03  5.946E-02  0.000E+00  0.000E+00  2.748E-03   1.1E+00
   10   24  7.339E+02  4.288E+04  3.462E-06  3.346E-05  0.000E+00  0.000E+00  1.664E-03   6.4E+01
   10   25  5.665E+02  2.000E+09  1.444E-01  1.077E+00  0.000E+00  0.000E+00  2.802E-02   1.4E+00
   10   26  5.452E+02  0.000E+00  0.000E+00  0.000E+00  0.000E+00  0.000E+00  6.874E-01   0.0E+00
   10   27  4.983E+02  3.467E+09  1.291E-01  8.468E-01  0.000E+00  0.000E+00  1.872E-01   9.1E-01
   10   28  4.879E+02  7.140E+08  3.822E-02  2.456E-01  0.000E+00  0.000E+00  5.745E-01   9.9E-01
   10   29  3.954E+02  7.213E+05  1.691E-05  8.803E-05  0.000E+00  0.000E+00  1.136E-01   5.8E+00
   10   30  3.896E+02  4.310E+09  4.903E-02  2.515E-01  0.000E+00  0.000E+00  1.202E-01   6.6E-01
   10   31  3.470E+02  3.860E+07  6.967E-04  3.183E-03  0.000E+00  0.000E+00  4.543E-03   7.5E-01
   10   32  3.314E+02  2.058E+09  1.694E-02  7.392E-02  0.000E+00  0.000E+00  5.097E-02   7.6E-01
   10   33  3.304E+02  0.000E+00  0.000E+00  0.000E+00  5.982E+00  0.000E+00  0.000E+00   0.0E+00
   10   34  3.291E+02  0.000E+00  0.000E+00  0.000E+00  1.319E+01  1.989E-01  0.000E+00   0.0E+00
   10   35  3.250E+02  0.000E+00  0.000E+00  0.000E+00  3.399E+00  1.993E+00  0.000E+00   0.0E+00
   10   36  3.196E+02  0.000E+00  0.000E+00  0.000E+00  6.537E+01  7.314E+00  0.000E+00   0.0E+00
   10   38  3.009E+02  0.000E+00  0.000E+00  0.000E+00  3.133E+01  0.000E+00  0.000E+00   0.0E+00
   10   39  2.942E+02  0.000E+00  0.000E+00  0.000E+00  2.008E+02  2.135E-01  0.000E+00   0.0E+00
   10   40  2.881E+02  0.000E+00  0.000E+00  0.000E+00  2.049E+02  3.094E-02  0.000E+00   0.0E+00
   10   41  2.877E+02  0.000E+00  0.000E+00  0.000E+00  3.518E+02  1.706E-02  0.000E+00   0.0E+00
   10   42  2.826E+02  0.000E+00  0.000E+00  0.000E+00  4.610E+03  9.617E-01  0.000E+00   0.0E+00
   10   43  2.819E+02  0.000E+00  0.000E+00  0.000E+00  4.498E+01  6.799E-01  0.000E+00   0.0E+00
   10   44  2.820E+02  0.000E+00  0.000E+00  0.000E+00  5.317E+00  0.000E+00  0.000E+00   0.0E+00
   10   45  2.797E+02  0.000E+00  0.000E+00  0.000E+00  5.293E+02  3.274E+00  0.000E+00   0.0E+00
   10   46  2.748E+02  0.000E+00  0.000E+00  0.000E+00  8.297E+02  4.676E-02  0.000E+00   0.0E+00
   10   47  2.724E+02  0.000E+00  0.000E+00  0.000E+00  1.340E+03  1.635E-01  0.000E+00   0.0E+00
   10   48  2.631E+02  0.000E+00  0.000E+00  0.000E+00  1.814E+04  1.095E+00  0.000E+00   0.0E+00
   10   49  2.593E+02  0.000E+00  0.000E+00  0.000E+00  1.387E+03  4.272E+00  0.000E+00   0.0E+00
   10   50  2.408E+02  0.000E+00  0.000E+00  0.000E+00  1.142E+05  0.000E+00  0.000E+00   0.0E+00
   10   52  2.291E+02  0.000E+00  0.000E+00  0.000E+00  4.002E+04  3.248E-02  0.000E+00   0.0E+00
   10   53  2.277E+02  0.000E+00  0.000E+00  0.000E+00  1.636E+05  1.654E-01  0.000E+00   0.0E+00
   10   54  2.258E+02  0.000E+00  0.000E+00  0.000E+00  2.747E+04  0.000E+00  0.000E+00   0.0E+00
   10   55  2.202E+02  0.000E+00  0.000E+00  0.000E+00  2.126E+04  4.123E+00  0.000E+00   0.0E+00
   10   56  2.192E+02  0.000E+00  0.000E+00  0.000E+00  1.174E+02  3.684E+00  0.000E+00   0.0E+00
   10   57  2.136E+02  0.000E+00  0.000E+00  0.000E+00  1.727E+05  3.740E-01  0.000E+00   0.0E+00
   10   58  2.137E+02  0.000E+00  0.000E+00  0.000E+00  1.957E+05  1.523E+00  0.000E+00   0.0E+00
   10   59  1.902E+02  0.000E+00  0.000E+00  0.000E+00  2.974E+03  2.441E+00  0.000E+00   0.0E+00
   10   60  1.877E+02  0.000E+00  0.000E+00  0.000E+00  1.673E+03  1.256E+00  0.000E+00   0.0E+00
   10   61  1.731E+02  3.430E+07  2.311E-04  5.267E-04  0.000E+00  0.000E+00  1.306E+00   7.8E-01
   10   62  1.679E+02  3.246E+08  1.372E-03  3.034E-03  0.000E+00  0.000E+00  2.026E+01   6.9E-01
   10   63  1.637E+02  2.031E+07  4.079E-05  8.791E-05  0.000E+00  0.000E+00  6.794E+01   3.2E-02
   10   64  1.580E+02  1.238E+09  4.634E-03  9.641E-03  0.000E+00  0.000E+00  1.237E+00   8.4E-01
   10   65  1.527E+02  1.383E+09  2.417E-03  4.858E-03  0.000E+00  0.000E+00  2.033E+00   6.0E-01
   10   66  1.353E+02  0.000E+00  0.000E+00  0.000E+00  3.394E-01  2.151E-01  0.000E+00   0.0E+00
   10   67  1.308E+02  0.000E+00  0.000E+00  0.000E+00  2.808E+00  0.000E+00  0.000E+00   0.0E+00
   10   68  1.306E+02  0.000E+00  0.000E+00  0.000E+00  8.450E+00  1.557E+00  0.000E+00   0.0E+00
   10   69  1.290E+02  0.000E+00  0.000E+00  0.000E+00  1.034E+02  7.357E+00  0.000E+00   0.0E+00
   10   70  1.273E+02  0.000E+00  0.000E+00  0.000E+00  3.067E+01  3.063E+00  0.000E+00   0.0E+00
   10   71  1.272E+02  0.000E+00  0.000E+00  0.000E+00  2.546E+01  2.231E+01  0.000E+00   0.0E+00
   10   72  1.255E+02  0.000E+00  0.000E+00  0.000E+00  3.386E-01  1.822E+00  0.000E+00   0.0E+00
   10   73  1.248E+02  0.000E+00  0.000E+00  0.000E+00  1.075E-01  1.328E-01  0.000E+00   0.0E+00
   10   74  1.244E+02  0.000E+00  0.000E+00  0.000E+00  1.643E+01  9.072E-01  0.000E+00   0.0E+00
   10   75  1.243E+02  0.000E+00  0.000E+00  0.000E+00  4.808E+02  1.103E+00  0.000E+00   0.0E+00
   10   76  1.233E+02  0.000E+00  0.000E+00  0.000E+00  8.772E+01  2.356E-03  0.000E+00   0.0E+00
   10   77  1.218E+02  0.000E+00  0.000E+00  0.000E+00  1.294E+03  6.979E-01  0.000E+00   0.0E+00
   10   78  1.177E+02  1.332E+10  2.764E-02  4.283E-02  0.000E+00  0.000E+00  1.364E+01   5.6E-01
   10   79  1.174E+02  1.212E+11  1.252E-01  1.935E-01  0.000E+00  0.000E+00  1.524E+01   5.5E-01
   10   80  1.163E+02  0.000E+00  0.000E+00  0.000E+00  9.738E+03  5.824E-01  0.000E+00   0.0E+00
   10   81  1.024E+02  9.128E+05  7.171E-07  9.668E-07  0.000E+00  0.000E+00  5.480E-03   1.2E+00
   10   82  1.019E+02  9.356E+04  1.457E-07  1.956E-07  0.000E+00  0.000E+00  1.938E-04   2.1E-01
   10   84  1.011E+02  1.255E+05  2.886E-07  3.843E-07  0.000E+00  0.000E+00  4.108E-02   6.7E-01
   10   85  1.007E+02  0.000E+00  0.000E+00  0.000E+00  0.000E+00  0.000E+00  1.027E-01   0.0E+00
   10   86  9.978E+01  6.647E+03  1.488E-08  1.955E-08  0.000E+00  0.000E+00  3.991E-02   1.2E+02
   10   87  9.897E+01  1.989E+04  2.920E-08  3.806E-08  0.000E+00  0.000E+00  5.381E-02   9.5E+00
   10   88  9.832E+01  0.000E+00  0.000E+00  0.000E+00  0.000E+00  0.000E+00  1.542E-02   0.0E+00
   10   89  9.764E+01  0.000E+00  0.000E+00  0.000E+00  2.456E+03  4.176E-02  0.000E+00   0.0E+00
   10   90  9.715E+01  3.798E+06  2.687E-06  3.438E-06  0.000E+00  0.000E+00  9.023E-02   1.3E+00
   10   91  9.694E+01  0.000E+00  0.000E+00  0.000E+00  1.109E+02  2.974E+00  0.000E+00   0.0E+00
   10   92  9.694E+01  7.861E+06  1.661E-05  2.120E-05  0.000E+00  0.000E+00  2.301E-01   7.3E-02
   10   93  9.678E+01  9.091E+05  1.277E-06  1.627E-06  0.000E+00  0.000E+00  9.479E-02   1.3E+00
   10   94  9.672E+01  0.000E+00  0.000E+00  0.000E+00  0.000E+00  0.000E+00  6.944E-01   0.0E+00
   10   95  9.637E+01  9.882E+05  2.064E-06  2.619E-06  0.000E+00  0.000E+00  1.290E-01   1.9E+00
   10   96  9.580E+01  0.000E+00  0.000E+00  0.000E+00  4.570E+03  1.695E-01  0.000E+00   0.0E+00
   10   97  9.548E+01  0.000E+00  0.000E+00  0.000E+00  1.036E+03  5.964E-01  0.000E+00   0.0E+00
   10   98  9.543E+01  2.812E+05  3.839E-07  4.824E-07  0.000E+00  0.000E+00  2.691E-01   8.3E+00
   10   99  9.467E+01  8.284E+07  1.670E-04  2.081E-04  0.000E+00  0.000E+00  2.432E-01   1.0E-01
   10  100  9.359E+01  0.000E+00  0.000E+00  0.000E+00  6.453E+01  2.466E-01  0.000E+00   0.0E+00
   10  101  9.310E+01  1.353E+07  8.792E-06  1.078E-05  0.000E+00  0.000E+00  2.545E-02   2.3E+00
   10  102  9.144E+01  3.327E+07  4.170E-05  5.021E-05  0.000E+00  0.000E+00  7.659E-02   3.9E-01
   11   12  5.314E+04  0.000E+00  0.000E+00  0.000E+00  1.256E-07  1.466E-01  0.000E+00   0.0E+00
   11   13  6.755E+03  0.000E+00  0.000E+00  0.000E+00  1.246E-03  0.000E+00  0.000E+00   0.0E+00
   11   14  4.488E+03  0.000E+00  0.000E+00  0.000E+00  4.703E-02  2.900E+01  0.000E+00   0.0E+00
   11   15  3.689E+03  0.000E+00  0.000E+00  0.000E+00  5.345E-03  1.357E+01  0.000E+00   0.0E+00
   11   16  3.479E+03  0.000E+00  0.000E+00  0.000E+00  0.000E+00  0.000E+00  9.344E-08   0.0E+00
   11   17  2.300E+03  0.000E+00  0.000E+00  0.000E+00  6.476E-02  0.000E+00  0.000E+00   0.0E+00
   11   18  2.260E+03  0.000E+00  0.000E+00  0.000E+00  2.231E-03  1.461E+02  0.000E+00   0.0E+00
   11   19  2.069E+03  0.000E+00  0.000E+00  0.000E+00  3.369E-03  0.000E+00  0.000E+00   0.0E+00
   11   20  1.835E+03  0.000E+00  0.000E+00  0.000E+00  2.642E-01  1.137E+02  0.000E+00   0.0E+00
   11   21  1.773E+03  0.000E+00  0.000E+00  0.000E+00  2.438E-01  4.273E+02  0.000E+00   0.0E+00
   11   22  1.497E+03  0.000E+00  0.000E+00  0.000E+00  2.089E-01  4.450E+02  0.000E+00   0.0E+00
   11   23  1.382E+03  0.000E+00  0.000E+00  0.000E+00  2.455E-05  0.000E+00  0.000E+00   0.0E+00
   11   24  1.371E+03  0.000E+00  0.000E+00  0.000E+00  1.364E-01  7.084E+01  0.000E+00   0.0E+00
   11   25  8.837E+02  0.000E+00  0.000E+00  0.000E+00  1.867E-03  1.953E+02  0.000E+00   0.0E+00
   11   26  8.328E+02  0.000E+00  0.000E+00  0.000E+00  1.897E-01  7.077E+01  0.000E+00   0.0E+00
   11   27  7.282E+02  0.000E+00  0.000E+00  0.000E+00  1.519E-05  1.090E+02  0.000E+00   0.0E+00
   11   28  7.062E+02  0.000E+00  0.000E+00  0.000E+00  1.994E-01  1.129E+03  0.000E+00   0.0E+00
   11   29  5.275E+02  0.000E+00  0.000E+00  0.000E+00  4.797E-01  7.941E-01  0.000E+00   0.0E+00
   11   30  5.172E+02  0.000E+00  0.000E+00  0.000E+00  5.591E-01  0.000E+00  0.000E+00   0.0E+00
   11   31  4.447E+02  0.000E+00  0.000E+00  0.000E+00  2.249E+00  2.452E+02  0.000E+00   0.0E+00
   11   32  4.195E+02  0.000E+00  0.000E+00  0.000E+00  5.907E-01  0.000E+00  0.000E+00   0.0E+00
   11   33  4.178E+02  3.671E+09  1.281E-01  1.057E+00  0.000E+00  0.000E+00  1.179E+00   1.1E+00
   11   34  4.158E+02  2.688E+09  6.968E-02  5.723E-01  0.000E+00  0.000E+00  6.508E-01   1.0E+00
   11   35  4.092E+02  9.991E+08  1.672E-02  1.351E-01  0.000E+00  0.000E+00  1.299E-02   9.7E-01
   11   36  4.007E+02  0.000E+00  0.000E+00  0.000E+00  0.000E+00  0.000E+00  6.622E-02   0.0E+00
   11   37  3.846E+02  0.000E+00  0.000E+00  0.000E+00  0.000E+00  0.000E+00  2.371E-01   0.0E+00
   11   38  3.717E+02  1.397E+08  3.859E-03  2.833E-02  0.000E+00  0.000E+00  1.325E-01   1.3E+00
   11   39  3.615E+02  0.000E+00  0.000E+00  0.000E+00  0.000E+00  0.000E+00  8.128E-01   0.0E+00
   11   40  3.525E+02  4.749E+07  8.844E-04  6.157E-03  0.000E+00  0.000E+00  1.403E+00   4.6E-01
   11   41  3.519E+02  1.160E+09  1.435E-02  9.974E-02  0.000E+00  0.000E+00  2.938E+00   7.6E-01
   11   42  3.443E+02  0.000E+00  0.000E+00  0.000E+00  0.000E+00  0.000E+00  5.266E-01   0.0E+00
   11   43  3.432E+02  4.888E+07  5.753E-04  3.900E-03  0.000E+00  0.000E+00  9.246E-03   8.5E-01
   11   44  3.433E+02  4.985E+05  1.174E-05  7.965E-05  0.000E+00  0.000E+00  1.561E-03   7.1E-05
   11   45  3.399E+02  8.528E+08  1.477E-02  9.915E-02  0.000E+00  0.000E+00  2.430E+00   7.7E-01
   11   46  3.327E+02  3.793E+07  4.196E-04  2.757E-03  0.000E+00  0.000E+00  8.715E-01   6.4E-01
   11   47  3.292E+02  2.392E+08  3.887E-03  2.528E-02  0.000E+00  0.000E+00  7.157E-03   6.8E-01
   11   48  3.158E+02  4.059E+07  4.045E-04  2.523E-03  0.000E+00  0.000E+00  6.276E-01   7.6E-01
   11   49  3.103E+02  1.232E+06  1.778E-05  1.090E-04  0.000E+00  0.000E+00  9.019E-01   7.0E-01
   11   50  2.841E+02  4.065E+05  6.558E-06  3.680E-05  0.000E+00  0.000E+00  2.904E-03   6.6E-01
   11   51  2.837E+02  0.000E+00  0.000E+00  0.000E+00  0.000E+00  0.000E+00  1.204E-02   0.0E+00
   11   52  2.679E+02  0.000E+00  0.000E+00  0.000E+00  0.000E+00  0.000E+00  9.243E-02   0.0E+00
   11   53  2.661E+02  1.613E+06  1.713E-05  9.002E-05  0.000E+00  0.000E+00  6.644E-02   8.8E-01
   11   54  2.635E+02  3.360E+05  4.664E-06  2.428E-05  0.000E+00  0.000E+00  1.932E-03   2.9E+00
   11   55  2.559E+02  5.076E+06  3.321E-05  1.679E-04  0.000E+00  0.000E+00  1.318E+00   8.6E-01
   11   56  2.545E+02  2.069E+06  2.009E-05  1.010E-04  0.000E+00  0.000E+00  1.709E+00   4.0E-01
   11   57  2.470E+02  2.175E+05  1.326E-06  6.472E-06  0.000E+00  0.000E+00  7.442E-01   4.9E-01
   11   58  2.471E+02  0.000E+00  0.000E+00  0.000E+00  0.000E+00  0.000E+00  9.940E-01   0.0E+00
   11   59  2.162E+02  1.512E+06  1.060E-05  4.526E-05  0.000E+00  0.000E+00  2.338E-01   3.5E-01
   11   60  2.130E+02  3.466E+05  1.572E-06  6.615E-06  0.000E+00  0.000E+00  1.708E-01   9.1E-01
   11   61  1.944E+02  0.000E+00  0.000E+00  0.000E+00  1.198E+03  7.346E+00  0.000E+00   0.0E+00
   11   62  1.879E+02  0.000E+00  0.000E+00  0.000E+00  9.002E+02  2.353E+01  0.000E+00   0.0E+00
   11   63  1.826E+02  0.000E+00  0.000E+00  0.000E+00  3.271E+02  0.000E+00  0.000E+00   0.0E+00
   11   64  1.756E+02  0.000E+00  0.000E+00  0.000E+00  8.241E+00  1.768E-01  0.000E+00   0.0E+00
   11   65  1.690E+02  0.000E+00  0.000E+00  0.000E+00  9.881E+00  0.000E+00  0.000E+00   0.0E+00
   11   66  1.479E+02  1.687E+10  3.690E-02  1.078E-01  0.000E+00  0.000E+00  2.855E+01   7.9E-01
   11   67  1.426E+02  3.135E+09  1.275E-02  3.591E-02  0.000E+00  0.000E+00  2.631E+01   9.8E-01
   11   68  1.424E+02  1.322E+10  4.022E-02  1.131E-01  0.000E+00  0.000E+00  2.629E+01   8.4E-01
   11   69  1.404E+02  6.107E+09  1.204E-02  3.339E-02  0.000E+00  0.000E+00  9.433E-01   8.5E-01
   11   70  1.385E+02  5.010E+09  1.440E-02  3.939E-02  0.000E+00  0.000E+00  3.128E+00   7.4E-01
   11   71  1.384E+02  0.000E+00  0.000E+00  0.000E+00  0.000E+00  0.000E+00  1.456E+01   0.0E+00
   11   72  1.363E+02  3.200E+08  5.944E-04  1.601E-03  0.000E+00  0.000E+00  1.412E+01   8.6E-01
   11   73  1.356E+02  1.537E+08  4.235E-04  1.134E-03  0.000E+00  0.000E+00  1.705E+01   3.5E-01
   11   74  1.351E+02  0.000E+00  0.000E+00  0.000E+00  0.000E+00  0.000E+00  1.842E-01   0.0E+00
   11   75  1.350E+02  2.150E+09  3.914E-03  1.044E-02  0.000E+00  0.000E+00  1.507E+00   8.3E-01
   11   76  1.338E+02  0.000E+00  0.000E+00  0.000E+00  0.000E+00  0.000E+00  1.268E+01   0.0E+00
   11   77  1.320E+02  1.042E+08  1.815E-04  4.735E-04  0.000E+00  0.000E+00  1.906E+00   8.0E-01
   11   78  1.271E+02  0.000E+00  0.000E+00  0.000E+00  4.089E+00  5.662E+00  0.000E+00   0.0E+00
   11   79  1.268E+02  0.000E+00  0.000E+00  0.000E+00  6.110E+00  0.000E+00  0.000E+00   0.0E+00
   11   80  1.256E+02  0.000E+00  0.000E+00  0.000E+00  0.000E+00  0.000E+00  1.441E+02   0.0E+00
   11   81  1.095E+02  0.000E+00  0.000E+00  0.000E+00  1.797E+04  0.000E+00  0.000E+00   0.0E+00
   11   82  1.090E+02  0.000E+00  0.000E+00  0.000E+00  1.580E+04  1.133E+01  0.000E+00   0.0E+00
   11   83  1.084E+02  0.000E+00  0.000E+00  0.000E+00  2.320E+05  0.000E+00  0.000E+00   0.0E+00
   11   84  1.080E+02  0.000E+00  0.000E+00  0.000E+00  2.140E+04  1.960E-02  0.000E+00   0.0E+00
   11   85  1.076E+02  0.000E+00  0.000E+00  0.000E+00  1.923E+05  2.744E-01  0.000E+00   0.0E+00
   11   86  1.065E+02  0.000E+00  0.000E+00  0.000E+00  9.835E+04  1.127E+00  0.000E+00   0.0E+00
   11   87  1.056E+02  0.000E+00  0.000E+00  0.000E+00  3.916E+04  2.571E-01  0.000E+00   0.0E+00
   11   88  1.048E+02  0.000E+00  0.000E+00  0.000E+00  4.846E+03  9.068E-01  0.000E+00   0.0E+00
   11   89  1.041E+02  4.189E+08  4.535E-04  9.324E-04  0.000E+00  0.000E+00  1.020E+02   5.2E-01
   11   90  1.035E+02  0.000E+00  0.000E+00  0.000E+00  2.015E+04  0.000E+00  0.000E+00   0.0E+00
   11   91  1.033E+02  1.150E+08  1.839E-04  3.752E-04  0.000E+00  0.000E+00  7.772E+01   5.1E-01
   11   92  1.033E+02  0.000E+00  0.000E+00  0.000E+00  2.164E+04  1.246E-01  0.000E+00   0.0E+00
   11   93  1.031E+02  0.000E+00  0.000E+00  0.000E+00  2.900E+04  4.644E-02  0.000E+00   0.0E+00
   11   94  1.030E+02  0.000E+00  0.000E+00  0.000E+00  2.783E+03  8.976E-01  0.000E+00   0.0E+00
   11   95  1.026E+02  0.000E+00  0.000E+00  0.000E+00  3.907E+03  1.691E-02  0.000E+00   0.0E+00
   11   96  1.020E+02  0.000E+00  0.000E+00  0.000E+00  0.000E+00  0.000E+00  1.676E+01   0.0E+00
   11   97  1.016E+02  9.881E+08  1.020E-03  2.047E-03  0.000E+00  0.000E+00  4.405E+01   5.1E-01
   11   98  1.016E+02  0.000E+00  0.000E+00  0.000E+00  3.616E+03  2.908E-01  0.000E+00   0.0E+00
   11   99  1.007E+02  0.000E+00  0.000E+00  0.000E+00  1.515E+03  8.676E-02  0.000E+00   0.0E+00
   11  100  9.949E+01  0.000E+00  0.000E+00  0.000E+00  0.000E+00  0.000E+00  1.774E+02   0.0E+00
   11  101  9.893E+01  0.000E+00  0.000E+00  0.000E+00  5.912E+02  0.000E+00  0.000E+00   0.0E+00
   11  102  9.706E+01  0.000E+00  0.000E+00  0.000E+00  6.282E+02  2.164E-01  0.000E+00   0.0E+00
   12   13  7.739E+03  0.000E+00  0.000E+00  0.000E+00  3.939E-08  7.894E+01  0.000E+00   0.0E+00
   12   14  4.902E+03  0.000E+00  0.000E+00  0.000E+00  2.502E-02  0.000E+00  0.000E+00   0.0E+00
   12   15  3.964E+03  0.000E+00  0.000E+00  0.000E+00  9.840E-03  3.298E-01  0.000E+00   0.0E+00
   12   16  3.722E+03  7.334E+03  7.618E-06  3.734E-04  0.000E+00  0.000E+00  4.791E-08   1.3E+01
   12   17  2.404E+03  0.000E+00  0.000E+00  0.000E+00  1.501E-03  2.554E+02  0.000E+00   0.0E+00
   12   18  2.360E+03  0.000E+00  0.000E+00  0.000E+00  2.650E-01  1.625E+02  0.000E+00   0.0E+00
   12   19  2.152E+03  0.000E+00  0.000E+00  0.000E+00  3.937E-01  5.069E+01  0.000E+00   0.0E+00
   12   20  1.901E+03  0.000E+00  0.000E+00  0.000E+00  6.289E-03  4.652E-01  0.000E+00   0.0E+00
   12   21  1.834E+03  0.000E+00  0.000E+00  0.000E+00  7.021E-02  1.593E+02  0.000E+00   0.0E+00
   12   22  1.540E+03  0.000E+00  0.000E+00  0.000E+00  2.703E-04  2.520E+01  0.000E+00   0.0E+00
   12   23  1.419E+03  0.000E+00  0.000E+00  0.000E+00  4.747E-02  1.392E+02  0.000E+00   0.0E+00
   12   24  1.408E+03  0.000E+00  0.000E+00  0.000E+00  3.009E-01  1.301E+02  0.000E+00   0.0E+00
   12   25  8.987E+02  0.000E+00  0.000E+00  0.000E+00  3.246E-01  5.194E+01  0.000E+00   0.0E+00
   12   26  8.461E+02  0.000E+00  0.000E+00  0.000E+00  5.741E-01  0.000E+00  0.000E+00   0.0E+00
   12   27  7.383E+02  0.000E+00  0.000E+00  0.000E+00  2.336E-02  4.893E+02  0.000E+00   0.0E+00
   12   28  7.157E+02  0.000E+00  0.000E+00  0.000E+00  2.286E-01  8.949E+01  0.000E+00   0.0E+00
   12   29  5.328E+02  0.000E+00  0.000E+00  0.000E+00  2.104E+01  5.021E+02  0.000E+00   0.0E+00
   12   30  5.223E+02  0.000E+00  0.000E+00  0.000E+00  5.577E+00  2.295E+00  0.000E+00   0.0E+00
   12   31  4.484E+02  0.000E+00  0.000E+00  0.000E+00  8.924E+00  5.355E+02  0.000E+00   0.0E+00
   12   32  4.228E+02  0.000E+00  0.000E+00  0.000E+00  1.847E+01  2.976E+01  0.000E+00   0.0E+00
   12   33  4.211E+02  0.000E+00  0.000E+00  0.000E+00  0.000E+00  0.000E+00  1.166E-01   0.0E+00
   12   34  4.191E+02  2.049E+09  8.093E-02  4.466E-01  0.000E+00  0.000E+00  1.647E-01   1.2E+00
   12   35  4.124E+02  3.373E+09  8.599E-02  4.669E-01  0.000E+00  0.000E+00  3.591E-03   1.1E+00
   12   36  4.038E+02  2.307E+09  2.819E-02  1.499E-01  0.000E+00  0.000E+00  3.546E-01   9.9E-01
   12   38  3.743E+02  0.000E+00  0.000E+00  0.000E+00  0.000E+00  0.000E+00  3.122E-01   0.0E+00
   12   39  3.640E+02  3.445E+09  3.422E-02  1.641E-01  0.000E+00  0.000E+00  5.459E-01   8.5E-01
   12   40  3.548E+02  2.470E+08  6.993E-03  3.267E-02  0.000E+00  0.000E+00  5.876E-01   9.6E-01
   12   41  3.542E+02  2.097E+08  3.944E-03  1.840E-02  0.000E+00  0.000E+00  6.994E-01   8.1E-01
   12   42  3.465E+02  3.768E+07  3.392E-04  1.548E-03  0.000E+00  0.000E+00  1.230E+00   6.3E-01
   12   43  3.454E+02  4.061E+07  7.263E-04  3.304E-03  0.000E+00  0.000E+00  2.518E-01   1.0E+00
   12   44  3.455E+02  0.000E+00  0.000E+00  0.000E+00  0.000E+00  0.000E+00  1.732E-02   0.0E+00
   12   45  3.421E+02  4.943E+08  1.301E-02  5.858E-02  0.000E+00  0.000E+00  6.818E-02   7.4E-01
   12   46  3.348E+02  5.791E+07  9.730E-04  4.289E-03  0.000E+00  0.000E+00  1.601E+00   6.8E-01
   12   47  3.313E+02  6.415E+07  1.584E-03  6.909E-03  0.000E+00  0.000E+00  6.558E-01   7.1E-01
   12   48  3.176E+02  8.654E+06  1.309E-04  5.475E-04  0.000E+00  0.000E+00  1.229E-01   6.3E-01
   12   49  3.121E+02  1.683E+07  3.686E-04  1.515E-03  0.000E+00  0.000E+00  9.400E-01   4.4E-01
   12   50  2.856E+02  0.000E+00  0.000E+00  0.000E+00  0.000E+00  0.000E+00  3.919E-03   0.0E+00
   12   52  2.693E+02  4.036E+07  2.194E-04  7.781E-04  0.000E+00  0.000E+00  1.362E-01   6.9E-01
   12   53  2.675E+02  1.698E+05  2.730E-06  9.616E-06  0.000E+00  0.000E+00  1.437E-01   6.4E-01
   12   54  2.648E+02  0.000E+00  0.000E+00  0.000E+00  0.000E+00  0.000E+00  6.251E-02   0.0E+00
   12   55  2.571E+02  3.195E+07  3.166E-04  1.072E-03  0.000E+00  0.000E+00  7.196E-01   8.0E-01
   12   56  2.558E+02  1.096E+02  1.612E-09  5.430E-09  0.000E+00  0.000E+00  1.280E+00   3.2E+04
   12   57  2.482E+02  2.551E+05  2.355E-06  7.698E-06  0.000E+00  0.000E+00  1.084E+00   9.3E-02
   12   58  2.483E+02  4.731E+04  2.186E-07  7.146E-07  0.000E+00  0.000E+00  5.387E-01   9.2E+00
   12   59  2.171E+02  1.026E+06  1.088E-05  3.109E-05  0.000E+00  0.000E+00  2.132E-01   8.3E-02
   12   60  2.139E+02  1.357E+06  9.305E-06  2.621E-05  0.000E+00  0.000E+00  5.914E-01   1.1E-01
   12   61  1.951E+02  0.000E+00  0.000E+00  0.000E+00  9.061E+02  1.540E+01  0.000E+00   0.0E+00
   12   62  1.886E+02  0.000E+00  0.000E+00  0.000E+00  2.553E+02  2.587E-01  0.000E+00   0.0E+00
   12   63  1.832E+02  0.000E+00  0.000E+00  0.000E+00  1.673E+01  9.053E-01  0.000E+00   0.0E+00
   12   64  1.761E+02  0.000E+00  0.000E+00  0.000E+00  6.136E+01  1.402E+01  0.000E+00   0.0E+00
   12   65  1.696E+02  0.000E+00  0.000E+00  0.000E+00  3.120E+01  1.184E+00  0.000E+00   0.0E+00
   12   66  1.484E+02  1.738E+10  5.733E-02  1.120E-01  0.000E+00  0.000E+00  4.482E+01   8.0E-01
   12   67  1.430E+02  0.000E+00  0.000E+00  0.000E+00  0.000E+00  0.000E+00  6.718E+00   0.0E+00
   12   68  1.428E+02  1.248E+09  5.722E-03  1.076E-02  0.000E+00  0.000E+00  2.521E+01   1.1E+00
   12   69  1.408E+02  8.642E+09  2.569E-02  4.763E-02  0.000E+00  0.000E+00  1.212E+01   8.9E-01
   12   70  1.388E+02  8.148E+08  3.532E-03  6.456E-03  0.000E+00  0.000E+00  1.484E+00   6.9E-01
   12   71  1.388E+02  8.695E+09  1.255E-02  2.293E-02  0.000E+00  0.000E+00  9.466E+00   8.7E-01
   12   72  1.367E+02  1.246E+07  3.489E-05  6.279E-05  0.000E+00  0.000E+00  1.180E+01   1.5E+00
   12   73  1.359E+02  9.247E+08  3.841E-03  6.874E-03  0.000E+00  0.000E+00  7.778E-02   7.9E-01
   12   74  1.354E+02  2.399E+09  3.296E-03  5.877E-03  0.000E+00  0.000E+00  1.752E+01   8.3E-01
   12   75  1.353E+02  1.901E+08  5.219E-04  9.299E-04  0.000E+00  0.000E+00  1.844E+00   6.3E-01
   12   76  1.341E+02  2.461E+09  3.319E-03  5.861E-03  0.000E+00  0.000E+00  6.546E+00   7.8E-01
   12   77  1.324E+02  2.731E+05  7.175E-07  1.251E-06  0.000E+00  0.000E+00  9.819E-01   5.2E-01
   12   78  1.274E+02  0.000E+00  0.000E+00  0.000E+00  2.394E+02  1.173E+00  0.000E+00   0.0E+00
   12   79  1.271E+02  0.000E+00  0.000E+00  0.000E+00  1.714E+02  1.870E+00  0.000E+00   0.0E+00
   12   80  1.259E+02  3.405E+09  4.045E-03  6.705E-03  0.000E+00  0.000E+00  2.762E+01   7.0E-01
   12   81  1.097E+02  0.000E+00  0.000E+00  0.000E+00  6.596E+00  1.289E+01  0.000E+00   0.0E+00
   12   82  1.092E+02  0.000E+00  0.000E+00  0.000E+00  2.143E+02  1.808E-03  0.000E+00   0.0E+00
   12   84  1.083E+02  0.000E+00  0.000E+00  0.000E+00  4.494E+03  1.750E+00  0.000E+00   0.0E+00
   12   85  1.078E+02  0.000E+00  0.000E+00  0.000E+00  1.096E+05  0.000E+00  0.000E+00   0.0E+00
   12   86  1.067E+02  0.000E+00  0.000E+00  0.000E+00  1.952E+05  3.930E-01  0.000E+00   0.0E+00
   12   87  1.058E+02  0.000E+00  0.000E+00  0.000E+00  1.962E+05  2.669E-01  0.000E+00   0.0E+00
   12   88  1.051E+02  0.000E+00  0.000E+00  0.000E+00  2.559E+04  0.000E+00  0.000E+00   0.0E+00
   12   89  1.043E+02  2.342E+08  3.819E-04  5.244E-04  0.000E+00  0.000E+00  1.268E+02   6.4E-01
   12   90  1.037E+02  0.000E+00  0.000E+00  0.000E+00  2.355E+05  5.931E-02  0.000E+00   0.0E+00
   12   91  1.035E+02  9.534E+07  2.296E-04  3.128E-04  0.000E+00  0.000E+00  1.117E+01   1.5E+00
   12   92  1.035E+02  0.000E+00  0.000E+00  0.000E+00  2.293E+03  2.014E-02  0.000E+00   0.0E+00
   12   93  1.033E+02  0.000E+00  0.000E+00  0.000E+00  2.579E+04  2.591E-03  0.000E+00   0.0E+00
   12   94  1.032E+02  0.000E+00  0.000E+00  0.000E+00  5.609E+03  0.000E+00  0.000E+00   0.0E+00
   12   95  1.028E+02  0.000E+00  0.000E+00  0.000E+00  3.222E+03  1.440E-03  0.000E+00   0.0E+00
   12   96  1.022E+02  1.126E+09  8.816E-04  1.186E-03  0.000E+00  0.000E+00  1.406E+02   3.8E-01
   12   97  1.018E+02  2.524E+08  3.923E-04  5.260E-04  0.000E+00  0.000E+00  1.463E+00   1.7E-01
   12   98  1.018E+02  0.000E+00  0.000E+00  0.000E+00  4.839E+03  1.455E-01  0.000E+00   0.0E+00
   12   99  1.009E+02  0.000E+00  0.000E+00  0.000E+00  2.075E+02  7.591E-03  0.000E+00   0.0E+00
   12  100  9.968E+01  1.824E+09  1.358E-03  1.783E-03  0.000E+00  0.000E+00  5.251E+01   6.0E-01
   12  101  9.912E+01  0.000E+00  0.000E+00  0.000E+00  5.703E+03  4.007E-07  0.000E+00   0.0E+00
   12  102  9.724E+01  0.000E+00  0.000E+00  0.000E+00  1.879E+03  2.089E-01  0.000E+00   0.0E+00
   13   15  8.128E+03  0.000E+00  0.000E+00  0.000E+00  1.474E-03  0.000E+00  0.000E+00   0.0E+00
   13   16  7.172E+03  1.323E+03  1.020E-05  4.816E-04  0.000E+00  0.000E+00  0.000E+00   2.3E+01
   13   17  3.487E+03  0.000E+00  0.000E+00  0.000E+00  0.000E+00  1.381E+02  0.000E+00   0.0E+00
   13   18  3.396E+03  0.000E+00  0.000E+00  0.000E+00  3.038E-02  1.342E+00  0.000E+00   0.0E+00
   13   19  2.982E+03  0.000E+00  0.000E+00  0.000E+00  0.000E+00  1.276E+02  0.000E+00   0.0E+00
   13   20  2.519E+03  0.000E+00  0.000E+00  0.000E+00  9.759E-02  0.000E+00  0.000E+00   0.0E+00
   13   21  2.403E+03  0.000E+00  0.000E+00  0.000E+00  1.575E-03  1.330E+00  0.000E+00   0.0E+00
   13   22  1.923E+03  0.000E+00  0.000E+00  0.000E+00  1.324E-02  1.630E+02  0.000E+00   0.0E+00
   13   23  1.737E+03  0.000E+00  0.000E+00  0.000E+00  0.000E+00  3.890E+02  0.000E+00   0.0E+00
   13   24  1.721E+03  0.000E+00  0.000E+00  0.000E+00  2.077E-01  5.318E+01  0.000E+00   0.0E+00
   13   25  1.017E+03  0.000E+00  0.000E+00  0.000E+00  5.382E-01  0.000E+00  0.000E+00   0.0E+00
   13   27  8.161E+02  0.000E+00  0.000E+00  0.000E+00  4.641E-01  2.379E+02  0.000E+00   0.0E+00
   13   28  7.886E+02  0.000E+00  0.000E+00  0.000E+00  2.638E-01  0.000E+00  0.000E+00   0.0E+00
   13   29  5.722E+02  0.000E+00  0.000E+00  0.000E+00  1.539E+01  4.234E-01  0.000E+00   0.0E+00
   13   30  5.601E+02  0.000E+00  0.000E+00  0.000E+00  0.000E+00  2.065E+02  0.000E+00   0.0E+00
   13   31  4.760E+02  0.000E+00  0.000E+00  0.000E+00  8.643E+00  2.213E+02  0.000E+00   0.0E+00
   13   32  4.472E+02  0.000E+00  0.000E+00  0.000E+00  0.000E+00  1.374E+03  0.000E+00   0.0E+00
   13   34  4.430E+02  0.000E+00  0.000E+00  0.000E+00  0.000E+00  0.000E+00  1.918E-01   0.0E+00
   13   35  4.356E+02  7.380E+08  4.198E-02  1.204E-01  0.000E+00  0.000E+00  7.171E-02   1.2E+00
   13   36  4.260E+02  2.754E+09  7.491E-02  2.101E-01  0.000E+00  0.000E+00  0.000E+00   1.1E+00
   13   39  3.820E+02  1.756E+09  3.842E-02  9.663E-02  0.000E+00  0.000E+00  0.000E+00   9.0E-01
   13   40  3.719E+02  0.000E+00  0.000E+00  0.000E+00  0.000E+00  0.000E+00  6.379E-01   0.0E+00
   13   41  3.712E+02  2.392E+09  9.883E-02  2.416E-01  0.000E+00  0.000E+00  3.754E-01   8.7E-01
   13   42  3.628E+02  5.694E+06  1.123E-04  2.684E-04  0.000E+00  0.000E+00  0.000E+00   9.5E-02
   13   43  3.615E+02  2.743E+07  1.075E-03  2.559E-03  0.000E+00  0.000E+00  5.848E-01   7.6E-01
   13   45  3.579E+02  0.000E+00  0.000E+00  0.000E+00  0.000E+00  0.000E+00  8.792E-02   0.0E+00
   13   46  3.499E+02  4.871E+06  1.788E-04  4.119E-04  0.000E+00  0.000E+00  1.357E+00   1.7E+00
   13   47  3.461E+02  0.000E+00  0.000E+00  0.000E+00  0.000E+00  0.000E+00  4.060E-02   0.0E+00
   13   48  3.312E+02  1.945E+07  6.397E-04  1.395E-03  0.000E+00  0.000E+00  6.092E-01   9.0E-01
   13   49  3.252E+02  0.000E+00  0.000E+00  0.000E+00  0.000E+00  0.000E+00  1.587E-01   0.0E+00
   13   52  2.790E+02  5.619E+07  6.558E-04  1.205E-03  0.000E+00  0.000E+00  0.000E+00   6.8E-01
   13   53  2.770E+02  0.000E+00  0.000E+00  0.000E+00  0.000E+00  0.000E+00  3.422E-01   0.0E+00
   13   55  2.659E+02  8.011E+07  1.699E-03  2.974E-03  0.000E+00  0.000E+00  3.615E-01   5.6E-01
   13   56  2.645E+02  0.000E+00  0.000E+00  0.000E+00  0.000E+00  0.000E+00  1.096E+00   0.0E+00
   13   57  2.564E+02  6.474E+04  1.276E-06  2.154E-06  0.000E+00  0.000E+00  1.319E+00   6.1E+01
   13   58  2.565E+02  3.878E+06  3.825E-05  6.460E-05  0.000E+00  0.000E+00  0.000E+00   2.5E+00
   13   59  2.234E+02  0.000E+00  0.000E+00  0.000E+00  0.000E+00  0.000E+00  5.372E-02   0.0E+00
   13   60  2.200E+02  2.701E+05  3.919E-06  5.676E-06  0.000E+00  0.000E+00  8.332E-01   2.4E+01
   13   61  2.002E+02  0.000E+00  0.000E+00  0.000E+00  4.491E+02  0.000E+00  0.000E+00   0.0E+00
   13   62  1.933E+02  0.000E+00  0.000E+00  0.000E+00  3.889E+01  7.677E+00  0.000E+00   0.0E+00
   13   63  1.877E+02  0.000E+00  0.000E+00  0.000E+00  0.000E+00  3.957E-04  0.000E+00   0.0E+00
   13   64  1.802E+02  0.000E+00  0.000E+00  0.000E+00  9.055E+01  7.474E-01  0.000E+00   0.0E+00
   13   65  1.733E+02  0.000E+00  0.000E+00  0.000E+00  0.000E+00  1.985E+01  0.000E+00   0.0E+00
   13   66  1.512E+02  7.639E+09  5.240E-02  5.219E-02  0.000E+00  0.000E+00  1.604E+01   7.8E-01
   13   68  1.455E+02  0.000E+00  0.000E+00  0.000E+00  0.000E+00  0.000E+00  3.708E+00   0.0E+00
   13   69  1.434E+02  1.077E+09  6.644E-03  6.273E-03  0.000E+00  0.000E+00  1.684E+01   1.0E+00
   13   70  1.414E+02  0.000E+00  0.000E+00  0.000E+00  0.000E+00  0.000E+00  9.745E+00   0.0E+00
   13   71  1.413E+02  6.508E+09  1.948E-02  1.812E-02  0.000E+00  0.000E+00  0.000E+00   9.2E-01
   13   72  1.391E+02  4.134E+08  2.399E-03  2.198E-03  0.000E+00  0.000E+00  5.500E-01   9.2E-01
   13   73  1.383E+02  0.000E+00  0.000E+00  0.000E+00  0.000E+00  0.000E+00  2.749E+00   0.0E+00
   13   74  1.378E+02  2.522E+09  7.180E-03  6.514E-03  0.000E+00  0.000E+00  0.000E+00   8.9E-01
   13   75  1.377E+02  2.684E+09  1.527E-02  1.384E-02  0.000E+00  0.000E+00  4.987E+00   8.1E-01
   13   76  1.365E+02  3.305E+09  9.229E-03  8.293E-03  0.000E+00  0.000E+00  0.000E+00   8.2E-01
   13   77  1.347E+02  1.837E+08  9.990E-04  8.858E-04  0.000E+00  0.000E+00  2.522E+00   7.1E-01
   13   78  1.296E+02  0.000E+00  0.000E+00  0.000E+00  2.173E+02  1.790E+00  0.000E+00   0.0E+00
   13   79  1.292E+02  0.000E+00  0.000E+00  0.000E+00  0.000E+00  1.348E+00  0.000E+00   0.0E+00
   13   80  1.280E+02  1.599E+09  3.924E-03  3.306E-03  0.000E+00  0.000E+00  0.000E+00   6.9E-01
   13   81  1.113E+02  0.000E+00  0.000E+00  0.000E+00  0.000E+00  4.144E-01  0.000E+00   0.0E+00
   13   82  1.108E+02  0.000E+00  0.000E+00  0.000E+00  1.758E+01  1.073E+00  0.000E+00   0.0E+00
   13   84  1.098E+02  0.000E+00  0.000E+00  0.000E+00  2.458E+02  0.000E+00  0.000E+00   0.0E+00
   13   86  1.082E+02  0.000E+00  0.000E+00  0.000E+00  4.371E+04  0.000E+00  0.000E+00   0.0E+00
   13   87  1.073E+02  0.000E+00  0.000E+00  0.000E+00  1.458E+05  9.432E-02  0.000E+00   0.0E+00
   13   89  1.057E+02  9.831E+07  3.294E-04  2.292E-04  0.000E+00  0.000E+00  6.339E+01   1.7E+00
   13   90  1.051E+02  0.000E+00  0.000E+00  0.000E+00  0.000E+00  6.496E-02  0.000E+00   0.0E+00
   13   91  1.049E+02  0.000E+00  0.000E+00  0.000E+00  0.000E+00  0.000E+00  1.209E-01   0.0E+00
   13   92  1.049E+02  0.000E+00  0.000E+00  0.000E+00  8.224E+04  0.000E+00  0.000E+00   0.0E+00
   13   93  1.047E+02  0.000E+00  0.000E+00  0.000E+00  1.275E+05  3.776E-02  0.000E+00   0.0E+00
   13   95  1.042E+02  0.000E+00  0.000E+00  0.000E+00  6.645E+02  0.000E+00  0.000E+00   0.0E+00
   13   96  1.036E+02  4.982E+08  8.008E-04  5.460E-04  0.000E+00  0.000E+00  0.000E+00   1.8E-01
   13   97  1.032E+02  5.063E+08  1.616E-03  1.098E-03  0.000E+00  0.000E+00  3.933E+01   4.7E-01
   13   98  1.031E+02  0.000E+00  0.000E+00  0.000E+00  6.207E+03  1.796E-01  0.000E+00   0.0E+00
   13   99  1.022E+02  0.000E+00  0.000E+00  0.000E+00  2.840E+02  0.000E+00  0.000E+00   0.0E+00
   13  100  1.010E+02  1.276E+09  1.950E-03  1.297E-03  0.000E+00  0.000E+00  0.000E+00   6.4E-01
   13  101  1.004E+02  0.000E+00  0.000E+00  0.000E+00  0.000E+00  2.339E+00  0.000E+00   0.0E+00
   13  102  9.848E+01  0.000E+00  0.000E+00  0.000E+00  3.906E+02  1.598E-01  0.000E+00   0.0E+00
   14   15  2.072E+04  0.000E+00  0.000E+00  0.000E+00  1.559E-06  1.425E+00  0.000E+00   0.0E+00
   14   18  4.552E+03  0.000E+00  0.000E+00  0.000E+00  1.875E-05  0.000E+00  0.000E+00   0.0E+00
   14   20  3.104E+03  0.000E+00  0.000E+00  0.000E+00  3.137E-02  4.605E+02  0.000E+00   0.0E+00
   14   21  2.930E+03  0.000E+00  0.000E+00  0.000E+00  3.624E-02  0.000E+00  0.000E+00   0.0E+00
   14   22  2.246E+03  0.000E+00  0.000E+00  0.000E+00  1.158E+00  0.000E+00  0.000E+00   0.0E+00
   14   24  1.975E+03  0.000E+00  0.000E+00  0.000E+00  3.790E-01  0.000E+00  0.000E+00   0.0E+00
   14   25  1.100E+03  0.000E+00  0.000E+00  0.000E+00  5.240E-05  2.657E+01  0.000E+00   0.0E+00
   14   26  1.022E+03  0.000E+00  0.000E+00  0.000E+00  2.466E-01  1.136E+03  0.000E+00   0.0E+00
   14   27  8.692E+02  0.000E+00  0.000E+00  0.000E+00  4.182E-01  0.000E+00  0.000E+00   0.0E+00
   14   28  8.380E+02  0.000E+00  0.000E+00  0.000E+00  2.319E+00  3.828E+02  0.000E+00   0.0E+00
   14   29  5.978E+02  0.000E+00  0.000E+00  0.000E+00  7.830E+00  0.000E+00  0.000E+00   0.0E+00
   14   31  4.936E+02  0.000E+00  0.000E+00  0.000E+00  2.049E-01  0.000E+00  0.000E+00   0.0E+00
   14   33  4.607E+02  1.205E+09  3.835E-02  4.653E-01  0.000E+00  0.000E+00  1.288E+00   1.1E+00
   14   34  4.582E+02  3.039E+08  7.174E-03  8.658E-02  0.000E+00  0.000E+00  1.203E-01   9.9E-01
   14   35  4.502E+02  0.000E+00  0.000E+00  0.000E+00  0.000E+00  0.000E+00  2.067E-04   0.0E+00
   14   37  4.207E+02  5.865E+09  1.945E-01  2.155E+00  0.000E+00  0.000E+00  3.305E+00   1.2E+00
   14   38  4.053E+02  2.762E+08  6.802E-03  7.260E-02  0.000E+00  0.000E+00  2.106E-01   1.2E+00
   14   40  3.825E+02  1.539E+05  2.532E-06  2.551E-05  0.000E+00  0.000E+00  4.139E-01   2.3E+00
   14   41  3.818E+02  0.000E+00  0.000E+00  0.000E+00  0.000E+00  0.000E+00  2.212E-01   0.0E+00
   14   43  3.716E+02  0.000E+00  0.000E+00  0.000E+00  0.000E+00  0.000E+00  5.031E-03   0.0E+00
   14   44  3.718E+02  1.310E+08  2.715E-03  2.658E-02  0.000E+00  0.000E+00  6.029E-01   1.3E+00
   14   45  3.677E+02  1.800E+08  2.737E-03  2.651E-02  0.000E+00  0.000E+00  5.337E-01   8.1E-01
   14   46  3.593E+02  0.000E+00  0.000E+00  0.000E+00  0.000E+00  0.000E+00  1.293E-01   0.0E+00
   14   47  3.553E+02  3.455E+07  4.905E-04  4.590E-03  0.000E+00  0.000E+00  7.078E-02   5.8E-01
   14   48  3.396E+02  0.000E+00  0.000E+00  0.000E+00  0.000E+00  0.000E+00  4.239E-02   0.0E+00
   14   49  3.333E+02  1.299E+06  1.623E-05  1.425E-04  0.000E+00  0.000E+00  2.209E-01   1.7E-01
   14   50  3.033E+02  2.567E+02  3.540E-09  2.828E-08  0.000E+00  0.000E+00  7.640E-03   3.1E+01
   14   51  3.029E+02  3.262E+06  5.607E-05  4.472E-04  0.000E+00  0.000E+00  3.044E-03   3.9E-01
   14   53  2.829E+02  1.776E+06  1.598E-05  1.190E-04  0.000E+00  0.000E+00  7.040E-02   6.5E-01
   14   54  2.800E+02  2.732E+07  3.211E-04  2.367E-03  0.000E+00  0.000E+00  8.232E-04   6.7E-01
   14   55  2.713E+02  0.000E+00  0.000E+00  0.000E+00  0.000E+00  0.000E+00  6.767E-01   0.0E+00
   14   56  2.698E+02  4.956E+03  4.058E-08  2.884E-07  0.000E+00  0.000E+00  5.946E-01   2.9E+01
   14   57  2.614E+02  0.000E+00  0.000E+00  0.000E+00  0.000E+00  0.000E+00  6.521E-02   0.0E+00
   14   59  2.272E+02  1.678E+05  9.733E-07  5.823E-06  0.000E+00  0.000E+00  7.227E-02   7.5E+00
   14   60  2.236E+02  0.000E+00  0.000E+00  0.000E+00  0.000E+00  0.000E+00  8.899E-03   0.0E+00
   14   61  2.032E+02  0.000E+00  0.000E+00  0.000E+00  1.881E+03  3.205E+01  0.000E+00   0.0E+00
   14   62  1.961E+02  0.000E+00  0.000E+00  0.000E+00  2.314E+03  0.000E+00  0.000E+00   0.0E+00
   14   64  1.827E+02  0.000E+00  0.000E+00  0.000E+00  4.483E+00  0.000E+00  0.000E+00   0.0E+00
   14   66  1.530E+02  0.000E+00  0.000E+00  0.000E+00  0.000E+00  0.000E+00  8.787E-05   0.0E+00
   14   67  1.473E+02  2.512E+10  8.172E-02  3.170E-01  0.000E+00  0.000E+00  5.678E+01   8.4E-01
   14   68  1.471E+02  2.710E+08  6.593E-04  2.554E-03  0.000E+00  0.000E+00  3.325E+00   1.3E+00
   14   69  1.450E+02  0.000E+00  0.000E+00  0.000E+00  0.000E+00  0.000E+00  4.400E+00   0.0E+00
   14   70  1.429E+02  8.565E+09  1.966E-02  7.397E-02  0.000E+00  0.000E+00  5.344E+01   6.8E-01
   14   72  1.406E+02  0.000E+00  0.000E+00  0.000E+00  0.000E+00  0.000E+00  2.398E+00   0.0E+00
   14   73  1.398E+02  1.696E+10  3.725E-02  1.371E-01  0.000E+00  0.000E+00  6.354E+00   7.5E-01
   14   75  1.392E+02  0.000E+00  0.000E+00  0.000E+00  0.000E+00  0.000E+00  1.278E+01   0.0E+00
   14   77  1.360E+02  0.000E+00  0.000E+00  0.000E+00  0.000E+00  0.000E+00  1.357E+01   0.0E+00
   14   78  1.308E+02  0.000E+00  0.000E+00  0.000E+00  2.225E+02  0.000E+00  0.000E+00   0.0E+00
   14   82  1.117E+02  0.000E+00  0.000E+00  0.000E+00  1.160E+04  0.000E+00  0.000E+00   0.0E+00
   14   83  1.111E+02  0.000E+00  0.000E+00  0.000E+00  5.751E+04  1.500E+00  0.000E+00   0.0E+00
   14   84  1.107E+02  0.000E+00  0.000E+00  0.000E+00  2.412E+04  6.654E+00  0.000E+00   0.0E+00
   14   85  1.102E+02  0.000E+00  0.000E+00  0.000E+00  4.466E+04  2.232E+00  0.000E+00   0.0E+00
   14   86  1.091E+02  0.000E+00  0.000E+00  0.000E+00  7.730E+03  6.893E-04  0.000E+00   0.0E+00
   14   87  1.081E+02  0.000E+00  0.000E+00  0.000E+00  1.460E+03  0.000E+00  0.000E+00   0.0E+00
   14   88  1.074E+02  0.000E+00  0.000E+00  0.000E+00  1.509E+04  5.462E-01  0.000E+00   0.0E+00
   14   89  1.066E+02  0.000E+00  0.000E+00  0.000E+00  0.000E+00  0.000E+00  1.126E+01   0.0E+00
   14   91  1.057E+02  4.136E+09  5.196E-03  1.447E-02  0.000E+00  0.000E+00  2.384E+02   5.3E-01
   14   92  1.057E+02  0.000E+00  0.000E+00  0.000E+00  8.577E+03  8.934E+00  0.000E+00   0.0E+00
   14   93  1.055E+02  0.000E+00  0.000E+00  0.000E+00  2.557E+03  0.000E+00  0.000E+00   0.0E+00
   14   94  1.055E+02  0.000E+00  0.000E+00  0.000E+00  3.195E+03  1.740E+00  0.000E+00   0.0E+00
   14   95  1.050E+02  0.000E+00  0.000E+00  0.000E+00  2.045E+01  2.058E-03  0.000E+00   0.0E+00
   14   97  1.040E+02  0.000E+00  0.000E+00  0.000E+00  0.000E+00  0.000E+00  1.679E+02   0.0E+00
   14   98  1.039E+02  0.000E+00  0.000E+00  0.000E+00  2.084E+01  0.000E+00  0.000E+00   0.0E+00
   14   99  1.030E+02  0.000E+00  0.000E+00  0.000E+00  3.929E+02  3.871E-01  0.000E+00   0.0E+00
   14  102  9.921E+01  0.000E+00  0.000E+00  0.000E+00  1.382E+02  0.000E+00  0.000E+00   0.0E+00
   15   16  6.095E+04  0.000E+00  0.000E+00  0.000E+00  0.000E+00  0.000E+00  1.245E-14   0.0E+00
   15   17  6.107E+03  0.000E+00  0.000E+00  0.000E+00  2.542E-03  0.000E+00  0.000E+00   0.0E+00
   15   18  5.834E+03  0.000E+00  0.000E+00  0.000E+00  1.009E-02  1.473E+02  0.000E+00   0.0E+00
   15   19  4.710E+03  0.000E+00  0.000E+00  0.000E+00  1.359E-02  0.000E+00  0.000E+00   0.0E+00
   15   20  3.651E+03  0.000E+00  0.000E+00  0.000E+00  2.318E-03  5.250E+01  0.000E+00   0.0E+00
   15   21  3.412E+03  0.000E+00  0.000E+00  0.000E+00  5.738E-02  2.336E-01  0.000E+00   0.0E+00
   15   22  2.518E+03  0.000E+00  0.000E+00  0.000E+00  3.400E-01  2.361E+00  0.000E+00   0.0E+00
   15   23  2.209E+03  0.000E+00  0.000E+00  0.000E+00  5.899E-01  0.000E+00  0.000E+00   0.0E+00
   15   24  2.183E+03  0.000E+00  0.000E+00  0.000E+00  1.481E-01  1.980E+02  0.000E+00   0.0E+00
   15   25  1.162E+03  0.000E+00  0.000E+00  0.000E+00  6.634E-02  8.544E+02  0.000E+00   0.0E+00
   15   26  1.076E+03  0.000E+00  0.000E+00  0.000E+00  1.987E-01  8.371E+00  0.000E+00   0.0E+00
   15   27  9.072E+02  0.000E+00  0.000E+00  0.000E+00  6.356E+00  2.717E+02  0.000E+00   0.0E+00
   15   28  8.733E+02  0.000E+00  0.000E+00  0.000E+00  1.106E-01  7.066E+01  0.000E+00   0.0E+00
   15   29  6.155E+02  0.000E+00  0.000E+00  0.000E+00  2.459E+02  6.596E+01  0.000E+00   0.0E+00
   15   30  6.016E+02  0.000E+00  0.000E+00  0.000E+00  2.250E+01  0.000E+00  0.000E+00   0.0E+00
   15   31  5.056E+02  0.000E+00  0.000E+00  0.000E+00  3.986E+01  8.123E+02  0.000E+00   0.0E+00
   15   32  4.733E+02  0.000E+00  0.000E+00  0.000E+00  1.272E+02  0.000E+00  0.000E+00   0.0E+00
   15   33  4.712E+02  1.693E+08  7.514E-03  6.994E-02  0.000E+00  0.000E+00  2.124E-03   1.0E+00
   15   34  4.686E+02  1.122E+08  3.694E-03  3.419E-02  0.000E+00  0.000E+00  1.344E-02   1.2E+00
   15   35  4.602E+02  1.227E+08  2.598E-03  2.361E-02  0.000E+00  0.000E+00  3.876E-02   9.9E-01
   15   36  4.495E+02  0.000E+00  0.000E+00  0.000E+00  0.000E+00  0.000E+00  8.018E-02   0.0E+00
   15   37  4.294E+02  0.000E+00  0.000E+00  0.000E+00  0.000E+00  0.000E+00  1.823E+00   0.0E+00
   15   38  4.134E+02  5.837E+09  1.994E-01  1.628E+00  0.000E+00  0.000E+00  8.958E-02   1.2E+00
   15   39  4.008E+02  0.000E+00  0.000E+00  0.000E+00  0.000E+00  0.000E+00  8.929E-04   0.0E+00
   15   40  3.897E+02  1.466E+09  3.336E-02  2.568E-01  0.000E+00  0.000E+00  1.624E-01   1.1E+00
   15   41  3.890E+02  6.048E+07  9.146E-04  7.027E-03  0.000E+00  0.000E+00  1.898E-01   7.3E-01
   15   42  3.797E+02  0.000E+00  0.000E+00  0.000E+00  0.000E+00  0.000E+00  1.370E-01   0.0E+00
   15   43  3.784E+02  4.840E+07  6.925E-04  5.176E-03  0.000E+00  0.000E+00  4.584E-04   1.0E+00
   15   44  3.785E+02  4.393E+07  1.258E-03  9.409E-03  0.000E+00  0.000E+00  5.802E-01   1.5E+00
   15   45  3.744E+02  2.966E+08  6.232E-03  4.608E-02  0.000E+00  0.000E+00  1.739E-01   7.1E-01
   15   46  3.656E+02  8.942E+07  1.195E-03  8.630E-03  0.000E+00  0.000E+00  5.574E-02   5.8E-01
   15   47  3.615E+02  7.221E+06  1.415E-04  1.010E-03  0.000E+00  0.000E+00  1.397E-01   1.7E+00
   15   48  3.453E+02  4.201E+07  5.006E-04  3.414E-03  0.000E+00  0.000E+00  7.394E-02   5.6E-01
   15   49  3.388E+02  1.333E+08  2.293E-03  1.534E-02  0.000E+00  0.000E+00  1.660E-01   6.3E-01
   15   50  3.078E+02  4.785E+06  9.063E-05  5.511E-04  0.000E+00  0.000E+00  1.110E-03   6.0E-01
   15   51  3.073E+02  0.000E+00  0.000E+00  0.000E+00  0.000E+00  0.000E+00  4.875E-03   0.0E+00
   15   52  2.889E+02  0.000E+00  0.000E+00  0.000E+00  0.000E+00  0.000E+00  1.714E-02   0.0E+00
   15   53  2.868E+02  1.329E+08  1.639E-03  9.283E-03  0.000E+00  0.000E+00  5.496E-02   6.5E-01
   15   54  2.838E+02  2.774E+06  4.466E-05  2.503E-04  0.000E+00  0.000E+00  1.087E-02   1.3E+00
   15   55  2.749E+02  3.042E+08  2.298E-03  1.248E-02  0.000E+00  0.000E+00  3.973E-01   2.6E-01
   15   56  2.734E+02  3.779E+08  4.234E-03  2.287E-02  0.000E+00  0.000E+00  3.480E-01   5.6E-01
   15   57  2.648E+02  3.406E+07  2.386E-04  1.248E-03  0.000E+00  0.000E+00  1.014E-02   5.9E-01
   15   58  2.649E+02  0.000E+00  0.000E+00  0.000E+00  0.000E+00  0.000E+00  1.358E-02   0.0E+00
   15   59  2.297E+02  2.088E+07  1.652E-04  7.492E-04  0.000E+00  0.000E+00  1.746E-02   5.1E-01
   15   60  2.261E+02  7.153E+05  3.654E-06  1.632E-05  0.000E+00  0.000E+00  5.348E-04   8.9E-02
   15   61  2.052E+02  0.000E+00  0.000E+00  0.000E+00  3.838E+02  1.472E-01  0.000E+00   0.0E+00
   15   62  1.980E+02  0.000E+00  0.000E+00  0.000E+00  1.224E+01  4.915E-03  0.000E+00   0.0E+00
   15   63  1.921E+02  0.000E+00  0.000E+00  0.000E+00  2.222E+03  0.000E+00  0.000E+00   0.0E+00
   15   64  1.843E+02  0.000E+00  0.000E+00  0.000E+00  1.821E+03  8.407E+00  0.000E+00   0.0E+00
   15   65  1.771E+02  0.000E+00  0.000E+00  0.000E+00  1.084E+02  0.000E+00  0.000E+00   0.0E+00
   15   66  1.541E+02  2.635E+08  6.256E-04  1.904E-03  0.000E+00  0.000E+00  1.133E-01   9.4E-01
   15   67  1.484E+02  3.520E+09  1.549E-02  4.539E-02  0.000E+00  0.000E+00  1.171E+01   8.7E-01
   15   68  1.481E+02  1.289E+10  4.241E-02  1.241E-01  0.000E+00  0.000E+00  5.216E+01   8.1E-01
   15   69  1.460E+02  6.702E+06  1.428E-05  4.117E-05  0.000E+00  0.000E+00  3.812E+01   5.6E-02
   15   70  1.439E+02  5.789E+09  1.796E-02  5.105E-02  0.000E+00  0.000E+00  9.392E+00   8.7E-01
   15   71  1.438E+02  0.000E+00  0.000E+00  0.000E+00  0.000E+00  0.000E+00  3.319E-01   0.0E+00
   15   72  1.416E+02  1.771E+10  3.547E-02  9.917E-02  0.000E+00  0.000E+00  1.261E+01   7.8E-01
   15   73  1.407E+02  2.438E+09  7.239E-03  2.012E-02  0.000E+00  0.000E+00  2.882E-01   7.6E-01
   15   74  1.402E+02  0.000E+00  0.000E+00  0.000E+00  0.000E+00  0.000E+00  2.242E+01   0.0E+00
   15   75  1.401E+02  8.015E+09  1.572E-02  4.351E-02  0.000E+00  0.000E+00  3.500E-01   7.2E-01
   15   76  1.388E+02  0.000E+00  0.000E+00  0.000E+00  0.000E+00  0.000E+00  5.388E+00   0.0E+00
   15   77  1.369E+02  2.485E+08  4.658E-04  1.260E-03  0.000E+00  0.000E+00  1.472E+00   8.9E-01
   15   78  1.317E+02  0.000E+00  0.000E+00  0.000E+00  5.755E+03  4.326E+00  0.000E+00   0.0E+00
   15   79  1.313E+02  0.000E+00  0.000E+00  0.000E+00  7.837E+03  0.000E+00  0.000E+00   0.0E+00
   15   80  1.300E+02  0.000E+00  0.000E+00  0.000E+00  0.000E+00  0.000E+00  9.155E-01   0.0E+00
   15   81  1.128E+02  0.000E+00  0.000E+00  0.000E+00  2.225E+03  0.000E+00  0.000E+00   0.0E+00
   15   82  1.123E+02  0.000E+00  0.000E+00  0.000E+00  1.584E+00  2.950E-02  0.000E+00   0.0E+00
   15   83  1.117E+02  0.000E+00  0.000E+00  0.000E+00  4.111E+04  0.000E+00  0.000E+00   0.0E+00
   15   84  1.113E+02  0.000E+00  0.000E+00  0.000E+00  3.574E+03  1.981E-01  0.000E+00   0.0E+00
   15   85  1.108E+02  0.000E+00  0.000E+00  0.000E+00  8.726E+00  1.607E+00  0.000E+00   0.0E+00
   15   86  1.097E+02  0.000E+00  0.000E+00  0.000E+00  1.560E+04  3.333E+00  0.000E+00   0.0E+00
   15   87  1.087E+02  0.000E+00  0.000E+00  0.000E+00  8.887E+03  1.398E+00  0.000E+00   0.0E+00
   15   88  1.079E+02  0.000E+00  0.000E+00  0.000E+00  5.327E+04  8.603E-01  0.000E+00   0.0E+00
   15   89  1.071E+02  3.878E+09  4.445E-03  9.404E-03  0.000E+00  0.000E+00  1.957E+02   5.3E-01
   15   90  1.065E+02  0.000E+00  0.000E+00  0.000E+00  4.138E+03  0.000E+00  0.000E+00   0.0E+00
   15   91  1.062E+02  6.259E+08  1.059E-03  2.223E-03  0.000E+00  0.000E+00  1.800E+01   5.5E-01
   15   92  1.062E+02  0.000E+00  0.000E+00  0.000E+00  7.988E+02  4.211E-01  0.000E+00   0.0E+00
   15   93  1.061E+02  0.000E+00  0.000E+00  0.000E+00  3.108E+03  5.217E+00  0.000E+00   0.0E+00
   15   94  1.060E+02  0.000E+00  0.000E+00  0.000E+00  3.115E+03  1.682E+00  0.000E+00   0.0E+00
   15   95  1.056E+02  0.000E+00  0.000E+00  0.000E+00  2.160E+04  2.551E-02  0.000E+00   0.0E+00
   15   96  1.049E+02  0.000E+00  0.000E+00  0.000E+00  0.000E+00  0.000E+00  2.733E+02   0.0E+00
   15   97  1.045E+02  1.332E+09  1.454E-03  3.001E-03  0.000E+00  0.000E+00  3.076E-03   5.1E-01
   15   98  1.044E+02  0.000E+00  0.000E+00  0.000E+00  1.072E+04  2.434E+00  0.000E+00   0.0E+00
   15   99  1.035E+02  0.000E+00  0.000E+00  0.000E+00  1.804E+03  3.444E-01  0.000E+00   0.0E+00
   15  100  1.022E+02  0.000E+00  0.000E+00  0.000E+00  0.000E+00  0.000E+00  1.039E+01   0.0E+00
   15  101  1.017E+02  0.000E+00  0.000E+00  0.000E+00  7.514E+03  0.000E+00  0.000E+00   0.0E+00
   15  102  9.968E+01  0.000E+00  0.000E+00  0.000E+00  5.299E+03  2.421E-02  0.000E+00   0.0E+00
   16   17  6.787E+03  1.322E+04  9.130E-05  4.080E-03  0.000E+00  0.000E+00  0.000E+00   6.7E+00
   16   18  6.452E+03  9.060E+01  1.131E-06  4.803E-05  0.000E+00  0.000E+00  2.987E-09   1.8E+01
   16   19  5.104E+03  1.304E+03  5.092E-06  1.711E-04  0.000E+00  0.000E+00  0.000E+00   6.2E+00
   16   20  3.883E+03  0.000E+00  0.000E+00  0.000E+00  0.000E+00  0.000E+00  2.250E-08   0.0E+00
   16   21  3.614E+03  1.166E+05  4.568E-04  1.087E-02  0.000E+00  0.000E+00  1.599E-06   3.1E-01
   16   22  2.627E+03  2.251E+04  4.657E-05  8.055E-04  0.000E+00  0.000E+00  7.574E-07   2.8E+00
   16   23  2.292E+03  2.040E+05  1.607E-04  2.426E-03  0.000E+00  0.000E+00  0.000E+00   1.5E-01
   16   24  2.264E+03  2.204E+05  3.386E-04  5.048E-03  0.000E+00  0.000E+00  3.486E-06   2.4E+00
   16   25  1.185E+03  0.000E+00  0.000E+00  0.000E+00  0.000E+00  0.000E+00  1.564E-07   0.0E+00
   16   27  9.209E+02  5.351E+05  1.361E-04  8.251E-04  0.000E+00  0.000E+00  2.211E-04   2.5E-01
   16   28  8.860E+02  0.000E+00  0.000E+00  0.000E+00  0.000E+00  0.000E+00  2.387E-05   0.0E+00
   16   29  6.218E+02  2.411E+07  2.795E-03  1.144E-02  0.000E+00  0.000E+00  1.947E-03   8.1E-01
   16   30  6.076E+02  5.503E+08  3.045E-02  1.218E-01  0.000E+00  0.000E+00  0.000E+00   1.2E+00
   16   31  5.099E+02  3.281E+09  2.557E-01  8.586E-01  0.000E+00  0.000E+00  1.464E+00   1.0E+00
   16   32  4.770E+02  2.977E+09  1.015E-01  3.189E-01  0.000E+00  0.000E+00  0.000E+00   1.0E+00
   16   34  4.722E+02  0.000E+00  0.000E+00  0.000E+00  1.808E-01  0.000E+00  0.000E+00   0.0E+00
   16   35  4.637E+02  0.000E+00  0.000E+00  0.000E+00  5.960E-01  6.095E-02  0.000E+00   0.0E+00
   16   36  4.529E+02  0.000E+00  0.000E+00  0.000E+00  0.000E+00  3.684E-02  0.000E+00   0.0E+00
   16   39  4.035E+02  0.000E+00  0.000E+00  0.000E+00  0.000E+00  2.170E-01  0.000E+00   0.0E+00
   16   40  3.922E+02  0.000E+00  0.000E+00  0.000E+00  7.965E+00  0.000E+00  0.000E+00   0.0E+00
   16   41  3.915E+02  0.000E+00  0.000E+00  0.000E+00  2.214E+01  5.707E-01  0.000E+00   0.0E+00
   16   42  3.821E+02  0.000E+00  0.000E+00  0.000E+00  0.000E+00  3.516E-03  0.000E+00   0.0E+00
   16   43  3.807E+02  0.000E+00  0.000E+00  0.000E+00  9.619E-01  1.824E-02  0.000E+00   0.0E+00
   16   45  3.767E+02  0.000E+00  0.000E+00  0.000E+00  2.082E+01  0.000E+00  0.000E+00   0.0E+00
   16   46  3.679E+02  0.000E+00  0.000E+00  0.000E+00  2.317E+02  4.255E-02  0.000E+00   0.0E+00
   16   47  3.637E+02  0.000E+00  0.000E+00  0.000E+00  2.177E+01  0.000E+00  0.000E+00   0.0E+00
   16   48  3.473E+02  0.000E+00  0.000E+00  0.000E+00  9.052E+01  1.186E-03  0.000E+00   0.0E+00
   16   49  3.407E+02  0.000E+00  0.000E+00  0.000E+00  5.502E+02  0.000E+00  0.000E+00   0.0E+00
   16   52  2.903E+02  0.000E+00  0.000E+00  0.000E+00  0.000E+00  4.454E-03  0.000E+00   0.0E+00
   16   53  2.881E+02  0.000E+00  0.000E+00  0.000E+00  2.917E+02  0.000E+00  0.000E+00   0.0E+00
   16   55  2.762E+02  0.000E+00  0.000E+00  0.000E+00  5.867E+02  9.301E-01  0.000E+00   0.0E+00
   16   56  2.746E+02  0.000E+00  0.000E+00  0.000E+00  6.569E+02  0.000E+00  0.000E+00   0.0E+00
   16   57  2.659E+02  0.000E+00  0.000E+00  0.000E+00  5.800E+01  1.840E-03  0.000E+00   0.0E+00
   16   58  2.660E+02  0.000E+00  0.000E+00  0.000E+00  0.000E+00  2.859E+00  0.000E+00   0.0E+00
   16   59  2.305E+02  0.000E+00  0.000E+00  0.000E+00  1.593E+05  0.000E+00  0.000E+00   0.0E+00
   16   60  2.269E+02  0.000E+00  0.000E+00  0.000E+00  1.764E+05  2.875E-01  0.000E+00   0.0E+00
   16   61  2.059E+02  0.000E+00  0.000E+00  0.000E+00  0.000E+00  0.000E+00  5.477E+00   0.0E+00
   16   62  1.986E+02  6.833E+07  8.084E-04  1.057E-03  0.000E+00  0.000E+00  2.587E+00   4.0E-01
   16   63  1.927E+02  6.979E+07  3.886E-04  4.931E-04  0.000E+00  0.000E+00  0.000E+00   4.0E-01
   16   64  1.849E+02  5.304E+08  5.436E-03  6.618E-03  0.000E+00  0.000E+00  1.584E+00   6.7E-01
   16   65  1.776E+02  2.201E+07  1.041E-04  1.218E-04  0.000E+00  0.000E+00  0.000E+00   2.5E+00
   16   66  1.545E+02  0.000E+00  0.000E+00  0.000E+00  1.851E-02  2.580E-01  0.000E+00   0.0E+00
   16   68  1.485E+02  0.000E+00  0.000E+00  0.000E+00  7.810E+01  0.000E+00  0.000E+00   0.0E+00
   16   69  1.463E+02  0.000E+00  0.000E+00  0.000E+00  1.136E+02  1.163E+00  0.000E+00   0.0E+00
   16   70  1.442E+02  0.000E+00  0.000E+00  0.000E+00  2.554E+02  0.000E+00  0.000E+00   0.0E+00
   16   71  1.441E+02  0.000E+00  0.000E+00  0.000E+00  0.000E+00  1.821E+00  0.000E+00   0.0E+00
   16   72  1.419E+02  0.000E+00  0.000E+00  0.000E+00  1.867E+01  1.453E-02  0.000E+00   0.0E+00
   16   73  1.411E+02  0.000E+00  0.000E+00  0.000E+00  2.488E+01  0.000E+00  0.000E+00   0.0E+00
   16   74  1.405E+02  0.000E+00  0.000E+00  0.000E+00  0.000E+00  1.287E+01  0.000E+00   0.0E+00
   16   75  1.404E+02  0.000E+00  0.000E+00  0.000E+00  4.852E+02  1.568E+01  0.000E+00   0.0E+00
   16   76  1.391E+02  0.000E+00  0.000E+00  0.000E+00  0.000E+00  6.515E+00  0.000E+00   0.0E+00
   16   77  1.372E+02  0.000E+00  0.000E+00  0.000E+00  9.335E+02  8.951E+00  0.000E+00   0.0E+00
   16   78  1.320E+02  9.346E+09  4.880E-02  4.240E-02  0.000E+00  0.000E+00  4.263E-01   1.9E+00
   16   79  1.316E+02  8.606E+09  2.235E-02  1.936E-02  0.000E+00  0.000E+00  0.000E+00   1.9E+00
   16   80  1.303E+02  0.000E+00  0.000E+00  0.000E+00  0.000E+00  1.714E+00  0.000E+00   0.0E+00
   16   81  1.130E+02  3.900E+05  7.470E-07  5.560E-07  0.000E+00  0.000E+00  0.000E+00   3.3E+00
   16   82  1.125E+02  1.021E+06  3.874E-06  2.869E-06  0.000E+00  0.000E+00  1.531E-01   3.1E+00
   16   84  1.115E+02  0.000E+00  0.000E+00  0.000E+00  0.000E+00  0.000E+00  1.171E+00   0.0E+00
   16   86  1.099E+02  0.000E+00  0.000E+00  0.000E+00  0.000E+00  0.000E+00  1.186E-01   0.0E+00
   16   87  1.089E+02  2.982E+05  1.060E-06  7.602E-07  0.000E+00  0.000E+00  5.225E-05   6.5E+00
   16   89  1.073E+02  0.000E+00  0.000E+00  0.000E+00  3.839E+02  2.392E-03  0.000E+00   0.0E+00
   16   90  1.067E+02  3.605E+06  6.154E-06  4.323E-06  0.000E+00  0.000E+00  0.000E+00   6.0E+00
   16   91  1.064E+02  0.000E+00  0.000E+00  0.000E+00  4.314E+01  0.000E+00  0.000E+00   0.0E+00
   16   92  1.064E+02  0.000E+00  0.000E+00  0.000E+00  0.000E+00  0.000E+00  2.360E-01   0.0E+00
   16   93  1.062E+02  2.672E+06  9.046E-06  6.328E-06  0.000E+00  0.000E+00  1.478E-02   4.8E+00
   16   95  1.058E+02  0.000E+00  0.000E+00  0.000E+00  0.000E+00  0.000E+00  1.115E-01   0.0E+00
   16   96  1.051E+02  0.000E+00  0.000E+00  0.000E+00  0.000E+00  2.206E-01  0.000E+00   0.0E+00
   16   97  1.047E+02  0.000E+00  0.000E+00  0.000E+00  9.014E+01  8.782E-01  0.000E+00   0.0E+00
   16   98  1.046E+02  7.535E+06  2.473E-05  1.703E-05  0.000E+00  0.000E+00  2.886E-01   1.8E+00
   16   99  1.037E+02  0.000E+00  0.000E+00  0.000E+00  0.000E+00  0.000E+00  6.451E-06   0.0E+00
   16  100  1.024E+02  0.000E+00  0.000E+00  0.000E+00  0.000E+00  4.772E-02  0.000E+00   0.0E+00
   16  101  1.018E+02  2.010E+08  3.124E-04  2.094E-04  0.000E+00  0.000E+00  0.000E+00   1.7E+00
   16  102  9.985E+01  3.118E+08  9.319E-04  6.126E-04  0.000E+00  0.000E+00  2.244E-04   1.4E+00
   17   18  1.304E+05  0.000E+00  0.000E+00  0.000E+00  5.632E-12  5.825E-04  0.000E+00   0.0E+00
   17   19  2.058E+04  0.000E+00  0.000E+00  0.000E+00  0.000E+00  5.134E-01  0.000E+00   0.0E+00
   17   20  9.077E+03  0.000E+00  0.000E+00  0.000E+00  8.912E-04  0.000E+00  0.000E+00   0.0E+00
   17   21  7.732E+03  0.000E+00  0.000E+00  0.000E+00  1.965E-04  1.637E+01  0.000E+00   0.0E+00
   17   22  4.285E+03  0.000E+00  0.000E+00  0.000E+00  4.581E-03  9.923E+00  0.000E+00   0.0E+00
   17   23  3.462E+03  0.000E+00  0.000E+00  0.000E+00  0.000E+00  8.656E+01  0.000E+00   0.0E+00
   17   24  3.397E+03  0.000E+00  0.000E+00  0.000E+00  2.026E-03  9.265E+00  0.000E+00   0.0E+00
   17   25  1.435E+03  0.000E+00  0.000E+00  0.000E+00  1.240E+00  0.000E+00  0.000E+00   0.0E+00
   17   27  1.066E+03  0.000E+00  0.000E+00  0.000E+00  1.272E+00  3.826E+01  0.000E+00   0.0E+00
   17   28  1.019E+03  0.000E+00  0.000E+00  0.000E+00  5.387E-01  0.000E+00  0.000E+00   0.0E+00
   17   29  6.845E+02  0.000E+00  0.000E+00  0.000E+00  3.732E+01  1.373E+01  0.000E+00   0.0E+00
   17   30  6.673E+02  0.000E+00  0.000E+00  0.000E+00  0.000E+00  6.689E+02  0.000E+00   0.0E+00
   17   31  5.513E+02  0.000E+00  0.000E+00  0.000E+00  2.945E+01  2.288E+02  0.000E+00   0.0E+00
   17   32  5.130E+02  0.000E+00  0.000E+00  0.000E+00  0.000E+00  1.338E+03  0.000E+00   0.0E+00
   17   34  5.075E+02  0.000E+00  0.000E+00  0.000E+00  0.000E+00  0.000E+00  4.000E-02   0.0E+00
   17   35  4.977E+02  7.667E+05  5.695E-05  1.866E-04  0.000E+00  0.000E+00  2.599E-02   4.4E+00
   17   36  4.852E+02  2.428E+07  8.572E-04  2.739E-03  0.000E+00  0.000E+00  0.000E+00   1.8E+00
   17   39  4.290E+02  1.098E+07  3.030E-04  8.558E-04  0.000E+00  0.000E+00  0.000E+00   1.0E+00
   17   40  4.162E+02  0.000E+00  0.000E+00  0.000E+00  0.000E+00  0.000E+00  5.803E-02   0.0E+00
   17   41  4.154E+02  1.317E+07  6.815E-04  1.864E-03  0.000E+00  0.000E+00  3.743E-01   5.4E-01
   17   42  4.049E+02  4.450E+09  1.094E-01  2.916E-01  0.000E+00  0.000E+00  0.000E+00   9.5E-01
   17   43  4.034E+02  1.881E+08  9.176E-03  2.437E-02  0.000E+00  0.000E+00  9.647E-02   1.4E+00
   17   45  3.988E+02  0.000E+00  0.000E+00  0.000E+00  0.000E+00  0.000E+00  3.928E-02   0.0E+00
   17   46  3.889E+02  2.499E+09  1.134E-01  2.903E-01  0.000E+00  0.000E+00  2.752E-02   9.3E-01
   17   47  3.843E+02  0.000E+00  0.000E+00  0.000E+00  0.000E+00  0.000E+00  3.809E-04   0.0E+00
   17   48  3.660E+02  2.900E+08  1.165E-02  2.807E-02  0.000E+00  0.000E+00  4.485E-01   7.8E-01
   17   49  3.587E+02  0.000E+00  0.000E+00  0.000E+00  0.000E+00  0.000E+00  9.134E-02   0.0E+00
   17   52  3.033E+02  6.772E+08  9.337E-03  1.864E-02  0.000E+00  0.000E+00  0.000E+00   7.4E-01
   17   53  3.009E+02  0.000E+00  0.000E+00  0.000E+00  0.000E+00  0.000E+00  1.165E+00   0.0E+00
   17   55  2.879E+02  8.975E+08  2.230E-02  4.228E-02  0.000E+00  0.000E+00  3.572E+00   6.5E-01
   17   56  2.862E+02  0.000E+00  0.000E+00  0.000E+00  0.000E+00  0.000E+00  1.954E+00   0.0E+00
   17   57  2.768E+02  8.444E+04  1.939E-06  3.533E-06  0.000E+00  0.000E+00  1.945E+00   3.0E+02
   17   58  2.769E+02  1.086E+04  1.248E-07  2.275E-07  0.000E+00  0.000E+00  0.000E+00   8.3E+02
   17   59  2.386E+02  0.000E+00  0.000E+00  0.000E+00  0.000E+00  0.000E+00  5.372E-02   0.0E+00
   17   60  2.348E+02  7.735E+06  1.278E-04  1.976E-04  0.000E+00  0.000E+00  2.133E-01   5.0E+00
   17   61  2.124E+02  0.000E+00  0.000E+00  0.000E+00  9.938E+01  0.000E+00  0.000E+00   0.0E+00
   17   62  2.046E+02  0.000E+00  0.000E+00  0.000E+00  1.116E+02  2.375E+00  0.000E+00   0.0E+00
   17   63  1.984E+02  0.000E+00  0.000E+00  0.000E+00  0.000E+00  2.986E+00  0.000E+00   0.0E+00
   17   64  1.901E+02  0.000E+00  0.000E+00  0.000E+00  2.982E+02  1.094E+01  0.000E+00   0.0E+00
   17   65  1.824E+02  0.000E+00  0.000E+00  0.000E+00  0.000E+00  1.808E+00  0.000E+00   0.0E+00
   17   66  1.581E+02  1.381E+09  1.035E-02  1.077E-02  0.000E+00  0.000E+00  1.598E+01   7.5E-01
   17   68  1.518E+02  0.000E+00  0.000E+00  0.000E+00  0.000E+00  0.000E+00  8.812E-01   0.0E+00
   17   69  1.496E+02  1.060E+09  7.112E-03  7.003E-03  0.000E+00  0.000E+00  1.078E-01   8.1E-01
   17   70  1.473E+02  0.000E+00  0.000E+00  0.000E+00  0.000E+00  0.000E+00  7.534E+00   0.0E+00
   17   71  1.473E+02  1.449E+09  4.711E-03  4.568E-03  0.000E+00  0.000E+00  0.000E+00   8.9E-01
   17   72  1.449E+02  1.191E+09  7.501E-03  7.157E-03  0.000E+00  0.000E+00  2.434E+01   8.2E-01
   17   73  1.441E+02  0.000E+00  0.000E+00  0.000E+00  0.000E+00  0.000E+00  2.538E+00   0.0E+00
   17   74  1.435E+02  1.765E+09  5.446E-03  5.145E-03  0.000E+00  0.000E+00  0.000E+00   9.8E-01
   17   75  1.434E+02  5.018E+08  3.093E-03  2.921E-03  0.000E+00  0.000E+00  1.873E+00   1.0E+00
   17   76  1.420E+02  1.756E+10  5.312E-02  4.967E-02  0.000E+00  0.000E+00  0.000E+00   8.2E-01
   17   77  1.401E+02  1.424E+09  8.379E-03  7.728E-03  0.000E+00  0.000E+00  3.659E+00   9.3E-01
   17   78  1.346E+02  0.000E+00  0.000E+00  0.000E+00  8.124E+02  5.322E-02  0.000E+00   0.0E+00
   17   79  1.342E+02  0.000E+00  0.000E+00  0.000E+00  0.000E+00  1.614E+01  0.000E+00   0.0E+00
   17   80  1.328E+02  4.799E+09  1.269E-02  1.110E-02  0.000E+00  0.000E+00  0.000E+00   6.3E-01
   17   81  1.149E+02  0.000E+00  0.000E+00  0.000E+00  0.000E+00  2.195E+00  0.000E+00   0.0E+00
   17   82  1.144E+02  0.000E+00  0.000E+00  0.000E+00  2.301E+02  1.279E+00  0.000E+00   0.0E+00
   17   84  1.134E+02  0.000E+00  0.000E+00  0.000E+00  6.930E+01  0.000E+00  0.000E+00   0.0E+00
   17   86  1.117E+02  0.000E+00  0.000E+00  0.000E+00  2.125E+02  0.000E+00  0.000E+00   0.0E+00
   17   87  1.107E+02  0.000E+00  0.000E+00  0.000E+00  7.354E+03  1.976E-01  0.000E+00   0.0E+00
   17   89  1.090E+02  4.907E+08  1.748E-03  1.255E-03  0.000E+00  0.000E+00  2.470E+01   1.4E+00
   17   90  1.084E+02  0.000E+00  0.000E+00  0.000E+00  0.000E+00  5.089E-01  0.000E+00   0.0E+00
   17   91  1.081E+02  0.000E+00  0.000E+00  0.000E+00  0.000E+00  0.000E+00  1.412E+01   0.0E+00
   17   92  1.081E+02  0.000E+00  0.000E+00  0.000E+00  2.038E+02  0.000E+00  0.000E+00   0.0E+00
   17   93  1.079E+02  0.000E+00  0.000E+00  0.000E+00  3.050E+04  7.200E-01  0.000E+00   0.0E+00
   17   95  1.074E+02  0.000E+00  0.000E+00  0.000E+00  6.364E+04  0.000E+00  0.000E+00   0.0E+00
   17   96  1.067E+02  3.875E+09  6.616E-03  4.649E-03  0.000E+00  0.000E+00  0.000E+00   3.7E-01
   17   97  1.063E+02  1.476E+09  5.002E-03  3.501E-03  0.000E+00  0.000E+00  2.480E+01   4.0E-01
   17   98  1.063E+02  0.000E+00  0.000E+00  0.000E+00  9.349E+04  1.381E-02  0.000E+00   0.0E+00
   17   99  1.053E+02  0.000E+00  0.000E+00  0.000E+00  2.328E+04  0.000E+00  0.000E+00   0.0E+00
   17  100  1.040E+02  4.163E+09  6.748E-03  4.620E-03  0.000E+00  0.000E+00  0.000E+00   5.9E-01
   17  101  1.034E+02  0.000E+00  0.000E+00  0.000E+00  0.000E+00  2.385E-01  0.000E+00   0.0E+00
   17  102  1.013E+02  0.000E+00  0.000E+00  0.000E+00  1.609E+04  1.204E-01  0.000E+00   0.0E+00
   18   19  2.443E+04  0.000E+00  0.000E+00  0.000E+00  1.038E-05  4.238E+00  0.000E+00   0.0E+00
   18   20  9.756E+03  0.000E+00  0.000E+00  0.000E+00  1.695E-04  1.215E+01  0.000E+00   0.0E+00
   18   21  8.219E+03  0.000E+00  0.000E+00  0.000E+00  5.487E-06  4.542E-02  0.000E+00   0.0E+00
   18   22  4.431E+03  0.000E+00  0.000E+00  0.000E+00  3.484E-02  4.467E-01  0.000E+00   0.0E+00
   18   23  3.556E+03  0.000E+00  0.000E+00  0.000E+00  5.568E-02  3.863E+01  0.000E+00   0.0E+00
   18   24  3.488E+03  0.000E+00  0.000E+00  0.000E+00  6.417E-02  5.619E+01  0.000E+00   0.0E+00
   18   25  1.451E+03  0.000E+00  0.000E+00  0.000E+00  4.834E-02  1.524E+02  0.000E+00   0.0E+00
   18   26  1.319E+03  0.000E+00  0.000E+00  0.000E+00  7.233E-02  0.000E+00  0.000E+00   0.0E+00
   18   27  1.074E+03  0.000E+00  0.000E+00  0.000E+00  4.430E-03  6.013E+01  0.000E+00   0.0E+00
   18   28  1.027E+03  0.000E+00  0.000E+00  0.000E+00  2.275E-02  6.064E+00  0.000E+00   0.0E+00
   18   29  6.882E+02  0.000E+00  0.000E+00  0.000E+00  1.435E+01  4.233E+00  0.000E+00   0.0E+00
   18   30  6.707E+02  0.000E+00  0.000E+00  0.000E+00  1.272E+01  2.667E+03  0.000E+00   0.0E+00
   18   31  5.536E+02  0.000E+00  0.000E+00  0.000E+00  6.268E+00  3.401E+01  0.000E+00   0.0E+00
   18   32  5.151E+02  0.000E+00  0.000E+00  0.000E+00  4.708E+01  3.101E+03  0.000E+00   0.0E+00
   18   33  5.126E+02  0.000E+00  0.000E+00  0.000E+00  0.000E+00  0.000E+00  4.214E-02   0.0E+00
   18   34  5.095E+02  8.011E+07  4.677E-03  3.138E-02  0.000E+00  0.000E+00  2.909E-03   9.5E-01
   18   35  4.996E+02  5.375E+07  2.012E-03  1.323E-02  0.000E+00  0.000E+00  6.544E-03   1.2E+00
   18   36  4.870E+02  1.610E+08  2.864E-03  1.837E-02  0.000E+00  0.000E+00  9.344E-02   9.5E-01
   18   38  4.449E+02  0.000E+00  0.000E+00  0.000E+00  0.000E+00  0.000E+00  1.886E-03   0.0E+00
   18   39  4.304E+02  1.288E+08  1.788E-03  1.013E-02  0.000E+00  0.000E+00  2.397E-01   1.0E+00
   18   40  4.176E+02  4.205E+09  1.649E-01  9.067E-01  0.000E+00  0.000E+00  6.440E-02   1.2E+00
   18   41  4.168E+02  1.039E+09  2.706E-02  1.485E-01  0.000E+00  0.000E+00  1.590E-01   9.7E-01
   18   42  4.062E+02  9.352E+05  1.157E-05  6.186E-05  0.000E+00  0.000E+00  5.345E-02   2.8E-03
   18   43  4.046E+02  1.021E+09  2.505E-02  1.335E-01  0.000E+00  0.000E+00  5.962E-03   1.2E+00
   18   44  4.048E+02  0.000E+00  0.000E+00  0.000E+00  0.000E+00  0.000E+00  1.341E+00   0.0E+00
   18   45  4.000E+02  6.824E+08  2.456E-02  1.294E-01  0.000E+00  0.000E+00  6.023E-01   1.1E+00
   18   46  3.901E+02  1.533E+07  3.498E-04  1.797E-03  0.000E+00  0.000E+00  6.760E-03   1.2E+00
   18   47  3.854E+02  3.762E+07  1.257E-03  6.378E-03  0.000E+00  0.000E+00  5.099E-01   8.9E-01
   18   48  3.670E+02  1.015E+07  2.050E-04  9.907E-04  0.000E+00  0.000E+00  2.689E-02   1.1E+00
   18   49  3.596E+02  7.654E+07  2.226E-03  1.054E-02  0.000E+00  0.000E+00  3.086E-01   1.5E+00
   18   50  3.250E+02  0.000E+00  0.000E+00  0.000E+00  0.000E+00  0.000E+00  5.639E-03   0.0E+00
   18   52  3.040E+02  2.092E+07  1.449E-04  5.801E-04  0.000E+00  0.000E+00  2.014E-02   1.3E+00
   18   53  3.016E+02  5.610E+05  1.148E-05  4.559E-05  0.000E+00  0.000E+00  2.825E-02   2.1E+00
   18   54  2.983E+02  0.000E+00  0.000E+00  0.000E+00  0.000E+00  0.000E+00  5.923E-02   0.0E+00
   18   55  2.885E+02  4.568E+07  5.701E-04  2.166E-03  0.000E+00  0.000E+00  5.496E-03   8.2E-01
   18   56  2.868E+02  2.509E+07  4.642E-04  1.753E-03  0.000E+00  0.000E+00  2.759E-03   1.6E+00
   18   57  2.773E+02  4.610E+07  5.316E-04  1.942E-03  0.000E+00  0.000E+00  6.611E-02   4.7E-01
   18   58  2.775E+02  3.532E+07  2.038E-04  7.447E-04  0.000E+00  0.000E+00  3.993E-01   1.2E-01
   18   59  2.391E+02  3.369E+05  4.331E-06  1.363E-05  0.000E+00  0.000E+00  2.429E-02   2.0E+00
   18   60  2.352E+02  1.882E+07  1.561E-04  4.833E-04  0.000E+00  0.000E+00  2.648E-03   2.3E-01
   18   61  2.127E+02  0.000E+00  0.000E+00  0.000E+00  2.359E+02  1.703E+01  0.000E+00   0.0E+00
   18   62  2.049E+02  0.000E+00  0.000E+00  0.000E+00  9.149E+02  1.716E+01  0.000E+00   0.0E+00
   18   63  1.987E+02  0.000E+00  0.000E+00  0.000E+00  1.389E+03  1.334E+00  0.000E+00   0.0E+00
   18   64  1.904E+02  0.000E+00  0.000E+00  0.000E+00  4.221E+02  7.922E-03  0.000E+00   0.0E+00
   18   65  1.827E+02  0.000E+00  0.000E+00  0.000E+00  7.274E+01  2.570E+01  0.000E+00   0.0E+00
   18   66  1.583E+02  7.510E+07  2.821E-04  5.881E-04  0.000E+00  0.000E+00  3.169E-01   1.1E+00
   18   67  1.522E+02  0.000E+00  0.000E+00  0.000E+00  0.000E+00  0.000E+00  8.517E+00   0.0E+00
   18   68  1.520E+02  7.001E+09  3.638E-02  7.281E-02  0.000E+00  0.000E+00  7.114E-02   8.4E-01
   18   69  1.497E+02  1.280E+10  4.302E-02  8.483E-02  0.000E+00  0.000E+00  1.895E+01   7.9E-01
   18   70  1.475E+02  1.681E+08  8.224E-04  1.598E-03  0.000E+00  0.000E+00  2.162E+00   8.9E-01
   18   71  1.474E+02  1.048E+09  1.708E-03  3.316E-03  0.000E+00  0.000E+00  4.800E+01   1.1E+00
   18   72  1.451E+02  3.040E+04  9.593E-08  1.832E-07  0.000E+00  0.000E+00  1.671E+00   1.0E+02
   18   73  1.442E+02  1.105E+09  5.169E-03  9.816E-03  0.000E+00  0.000E+00  7.191E-02   9.2E-01
   18   74  1.436E+02  2.924E+10  4.522E-02  8.553E-02  0.000E+00  0.000E+00  1.588E+01   7.6E-01
   18   75  1.436E+02  2.096E+07  6.475E-05  1.224E-04  0.000E+00  0.000E+00  2.197E-01   4.3E+00
   18   76  1.422E+02  5.654E+07  8.569E-05  1.604E-04  0.000E+00  0.000E+00  3.456E-02   9.2E-01
   18   77  1.402E+02  1.268E+09  3.739E-03  6.905E-03  0.000E+00  0.000E+00  3.096E-02   7.1E-01
   18   78  1.347E+02  0.000E+00  0.000E+00  0.000E+00  5.901E+02  6.077E-01  0.000E+00   0.0E+00
   18   79  1.343E+02  0.000E+00  0.000E+00  0.000E+00  8.999E+02  1.220E+00  0.000E+00   0.0E+00
   18   80  1.330E+02  9.043E+06  1.199E-05  2.099E-05  0.000E+00  0.000E+00  1.662E+00   3.0E-02
   18   81  1.151E+02  0.000E+00  0.000E+00  0.000E+00  1.998E+03  1.107E+00  0.000E+00   0.0E+00
   18   82  1.145E+02  0.000E+00  0.000E+00  0.000E+00  3.036E+03  6.494E-01  0.000E+00   0.0E+00
   18   84  1.135E+02  0.000E+00  0.000E+00  0.000E+00  5.685E+01  1.198E-01  0.000E+00   0.0E+00
   18   85  1.129E+02  0.000E+00  0.000E+00  0.000E+00  3.608E+04  0.000E+00  0.000E+00   0.0E+00
   18   86  1.118E+02  0.000E+00  0.000E+00  0.000E+00  2.237E+03  1.860E-01  0.000E+00   0.0E+00
   18   87  1.108E+02  0.000E+00  0.000E+00  0.000E+00  8.009E+03  3.544E+00  0.000E+00   0.0E+00
   18   88  1.099E+02  0.000E+00  0.000E+00  0.000E+00  4.320E+03  0.000E+00  0.000E+00   0.0E+00
   18   89  1.091E+02  3.387E+07  6.044E-05  8.683E-05  0.000E+00  0.000E+00  9.328E+01   1.8E+00
   18   90  1.085E+02  0.000E+00  0.000E+00  0.000E+00  3.291E+03  8.254E+00  0.000E+00   0.0E+00
   18   91  1.082E+02  4.743E+07  1.249E-04  1.780E-04  0.000E+00  0.000E+00  2.101E+01   2.2E+00
   18   92  1.082E+02  0.000E+00  0.000E+00  0.000E+00  5.186E+04  3.697E+00  0.000E+00   0.0E+00
   18   93  1.080E+02  0.000E+00  0.000E+00  0.000E+00  1.994E+04  6.854E-01  0.000E+00   0.0E+00
   18   94  1.080E+02  0.000E+00  0.000E+00  0.000E+00  9.973E+03  0.000E+00  0.000E+00   0.0E+00
   18   95  1.075E+02  0.000E+00  0.000E+00  0.000E+00  7.858E+01  8.437E-01  0.000E+00   0.0E+00
   18   96  1.068E+02  5.581E+08  4.772E-04  6.712E-04  0.000E+00  0.000E+00  7.907E+01   8.4E-01
   18   97  1.064E+02  9.770E+06  1.658E-05  2.324E-05  0.000E+00  0.000E+00  2.107E+00   4.5E+00
   18   98  1.063E+02  0.000E+00  0.000E+00  0.000E+00  1.149E+03  6.329E-01  0.000E+00   0.0E+00
   18   99  1.054E+02  0.000E+00  0.000E+00  0.000E+00  1.678E+03  4.553E-02  0.000E+00   0.0E+00
   18  100  1.041E+02  1.045E+07  8.487E-06  1.163E-05  0.000E+00  0.000E+00  1.119E+00   3.8E+00
   18  101  1.035E+02  0.000E+00  0.000E+00  0.000E+00  1.012E+02  4.150E-03  0.000E+00   0.0E+00
   18  102  1.014E+02  0.000E+00  0.000E+00  0.000E+00  5.407E+03  1.032E-01  0.000E+00   0.0E+00
   19   20  1.624E+04  0.000E+00  0.000E+00  0.000E+00  3.631E-08  0.000E+00  0.000E+00   0.0E+00
   19   21  1.239E+04  0.000E+00  0.000E+00  0.000E+00  2.181E-05  7.240E-01  0.000E+00   0.0E+00
   19   22  5.413E+03  0.000E+00  0.000E+00  0.000E+00  1.430E-02  9.687E+00  0.000E+00   0.0E+00
   19   23  4.162E+03  0.000E+00  0.000E+00  0.000E+00  0.000E+00  2.811E+01  0.000E+00   0.0E+00
   19   24  4.069E+03  0.000E+00  0.000E+00  0.000E+00  1.270E-06  2.382E+01  0.000E+00   0.0E+00
   19   25  1.543E+03  0.000E+00  0.000E+00  0.000E+00  4.286E-02  0.000E+00  0.000E+00   0.0E+00
   19   27  1.124E+03  0.000E+00  0.000E+00  0.000E+00  1.382E-02  1.358E+02  0.000E+00   0.0E+00
   19   28  1.072E+03  0.000E+00  0.000E+00  0.000E+00  2.419E-04  0.000E+00  0.000E+00   0.0E+00
   19   29  7.081E+02  0.000E+00  0.000E+00  0.000E+00  5.037E-05  2.376E+00  0.000E+00   0.0E+00
   19   30  6.897E+02  0.000E+00  0.000E+00  0.000E+00  0.000E+00  5.713E+01  0.000E+00   0.0E+00
   19   31  5.665E+02  0.000E+00  0.000E+00  0.000E+00  3.336E-01  4.806E+02  0.000E+00   0.0E+00
   19   32  5.262E+02  0.000E+00  0.000E+00  0.000E+00  0.000E+00  1.616E+02  0.000E+00   0.0E+00
   19   34  5.204E+02  0.000E+00  0.000E+00  0.000E+00  0.000E+00  0.000E+00  3.458E-03   0.0E+00
   19   35  5.101E+02  5.962E+07  4.651E-03  1.562E-02  0.000E+00  0.000E+00  1.221E-02   1.0E+00
   19   36  4.970E+02  1.020E+08  3.777E-03  1.236E-02  0.000E+00  0.000E+00  0.000E+00   1.0E+00
   19   39  4.381E+02  1.628E+08  4.684E-03  1.351E-02  0.000E+00  0.000E+00  0.000E+00   8.3E-01
   19   40  4.248E+02  0.000E+00  0.000E+00  0.000E+00  0.000E+00  0.000E+00  4.087E-04   0.0E+00
   19   41  4.240E+02  2.330E+05  1.256E-05  3.507E-05  0.000E+00  0.000E+00  1.743E-01   1.4E+01
   19   42  4.130E+02  1.538E+08  3.932E-03  1.069E-02  0.000E+00  0.000E+00  0.000E+00   1.0E+00
   19   43  4.114E+02  4.631E+09  2.350E-01  6.367E-01  0.000E+00  0.000E+00  1.067E-01   1.2E+00
   19   45  4.067E+02  0.000E+00  0.000E+00  0.000E+00  0.000E+00  0.000E+00  3.952E-01   0.0E+00
   19   46  3.964E+02  9.836E+07  4.635E-03  1.210E-02  0.000E+00  0.000E+00  3.084E-04   6.7E-01
   19   47  3.916E+02  0.000E+00  0.000E+00  0.000E+00  0.000E+00  0.000E+00  8.337E-01   0.0E+00
   19   48  3.726E+02  8.644E+05  3.599E-05  8.829E-05  0.000E+00  0.000E+00  2.699E-02   1.8E+00
   19   49  3.650E+02  0.000E+00  0.000E+00  0.000E+00  0.000E+00  0.000E+00  4.748E-01   0.0E+00
   19   52  3.078E+02  3.098E+07  4.400E-04  8.917E-04  0.000E+00  0.000E+00  0.000E+00   8.0E-01
   19   53  3.054E+02  0.000E+00  0.000E+00  0.000E+00  0.000E+00  0.000E+00  9.198E-02   0.0E+00
   19   55  2.920E+02  1.908E+08  4.876E-03  9.373E-03  0.000E+00  0.000E+00  1.372E-01   6.0E-01
   19   56  2.902E+02  0.000E+00  0.000E+00  0.000E+00  0.000E+00  0.000E+00  5.877E-04   0.0E+00
   19   57  2.805E+02  4.594E+06  1.084E-04  2.002E-04  0.000E+00  0.000E+00  2.774E-02   2.8E+00
   19   58  2.806E+02  3.365E+07  3.973E-04  7.341E-04  0.000E+00  0.000E+00  0.000E+00   5.2E-01
   19   59  2.414E+02  0.000E+00  0.000E+00  0.000E+00  0.000E+00  0.000E+00  1.771E-03   0.0E+00
   19   60  2.375E+02  4.831E+05  8.169E-06  1.277E-05  0.000E+00  0.000E+00  9.961E-04   5.1E+00
   19   61  2.146E+02  0.000E+00  0.000E+00  0.000E+00  1.384E+01  0.000E+00  0.000E+00   0.0E+00
   19   62  2.067E+02  0.000E+00  0.000E+00  0.000E+00  1.030E+03  5.020E+00  0.000E+00   0.0E+00
   19   63  2.003E+02  0.000E+00  0.000E+00  0.000E+00  0.000E+00  1.098E+01  0.000E+00   0.0E+00
   19   64  1.918E+02  0.000E+00  0.000E+00  0.000E+00  5.888E+01  9.883E+00  0.000E+00   0.0E+00
   19   65  1.840E+02  0.000E+00  0.000E+00  0.000E+00  0.000E+00  9.955E+00  0.000E+00   0.0E+00
   19   66  1.593E+02  6.046E+07  4.602E-04  4.828E-04  0.000E+00  0.000E+00  4.167E-01   8.5E-01
   19   68  1.529E+02  0.000E+00  0.000E+00  0.000E+00  0.000E+00  0.000E+00  1.496E+01   0.0E+00
   19   69  1.507E+02  5.446E+09  3.706E-02  3.677E-02  0.000E+00  0.000E+00  1.552E+01   8.4E-01
   19   70  1.484E+02  0.000E+00  0.000E+00  0.000E+00  0.000E+00  0.000E+00  1.848E-02   0.0E+00
   19   71  1.483E+02  1.848E+10  6.095E-02  5.953E-02  0.000E+00  0.000E+00  0.000E+00   7.9E-01
   19   72  1.459E+02  3.444E+09  2.199E-02  2.113E-02  0.000E+00  0.000E+00  2.071E+00   8.9E-01
   19   73  1.451E+02  0.000E+00  0.000E+00  0.000E+00  0.000E+00  0.000E+00  5.728E-01   0.0E+00
   19   74  1.445E+02  2.882E+09  9.019E-03  8.580E-03  0.000E+00  0.000E+00  0.000E+00   6.2E-01
   19   75  1.444E+02  3.918E+08  2.449E-03  2.328E-03  0.000E+00  0.000E+00  1.379E-02   6.8E-01
   19   76  1.430E+02  2.506E+07  7.684E-05  7.236E-05  0.000E+00  0.000E+00  0.000E+00   2.8E-01
   19   77  1.410E+02  3.411E+08  2.035E-03  1.890E-03  0.000E+00  0.000E+00  9.913E-02   9.4E-01
   19   78  1.355E+02  0.000E+00  0.000E+00  0.000E+00  1.387E+01  4.200E-02  0.000E+00   0.0E+00
   19   79  1.351E+02  0.000E+00  0.000E+00  0.000E+00  0.000E+00  2.834E+00  0.000E+00   0.0E+00
   19   80  1.337E+02  1.393E+08  3.733E-04  3.286E-04  0.000E+00  0.000E+00  0.000E+00   2.6E-01
   19   81  1.156E+02  0.000E+00  0.000E+00  0.000E+00  0.000E+00  1.518E+00  0.000E+00   0.0E+00
   19   82  1.150E+02  0.000E+00  0.000E+00  0.000E+00  9.581E+02  1.674E+00  0.000E+00   0.0E+00
   19   84  1.140E+02  0.000E+00  0.000E+00  0.000E+00  5.419E+02  0.000E+00  0.000E+00   0.0E+00
   19   86  1.123E+02  0.000E+00  0.000E+00  0.000E+00  1.357E+04  0.000E+00  0.000E+00   0.0E+00
   19   87  1.113E+02  0.000E+00  0.000E+00  0.000E+00  3.563E+02  1.177E+00  0.000E+00   0.0E+00
   19   89  1.096E+02  1.362E+08  4.903E-04  3.538E-04  0.000E+00  0.000E+00  5.522E+00   2.9E+00
   19   90  1.090E+02  0.000E+00  0.000E+00  0.000E+00  0.000E+00  4.688E-01  0.000E+00   0.0E+00
   19   91  1.087E+02  0.000E+00  0.000E+00  0.000E+00  0.000E+00  0.000E+00  1.615E+01   0.0E+00
   19   92  1.087E+02  0.000E+00  0.000E+00  0.000E+00  2.624E+04  0.000E+00  0.000E+00   0.0E+00
   19   93  1.085E+02  0.000E+00  0.000E+00  0.000E+00  1.340E+04  2.314E+00  0.000E+00   0.0E+00
   19   95  1.080E+02  0.000E+00  0.000E+00  0.000E+00  2.254E+04  0.000E+00  0.000E+00   0.0E+00
   19   96  1.073E+02  5.371E+08  9.266E-04  6.545E-04  0.000E+00  0.000E+00  0.000E+00   1.2E+00
   19   97  1.069E+02  1.897E+08  6.497E-04  4.572E-04  0.000E+00  0.000E+00  1.177E+00   8.3E-01
   19   98  1.068E+02  0.000E+00  0.000E+00  0.000E+00  1.271E+04  1.220E-01  0.000E+00   0.0E+00
   19   99  1.059E+02  0.000E+00  0.000E+00  0.000E+00  9.253E+02  0.000E+00  0.000E+00   0.0E+00
   19  100  1.045E+02  4.706E+07  7.707E-05  5.303E-05  0.000E+00  0.000E+00  0.000E+00   6.1E-02
   19  101  1.039E+02  0.000E+00  0.000E+00  0.000E+00  0.000E+00  1.420E-01  0.000E+00   0.0E+00
   19  102  1.018E+02  0.000E+00  0.000E+00  0.000E+00  5.822E+01  2.778E-02  0.000E+00   0.0E+00
   20   21  5.218E+04  0.000E+00  0.000E+00  0.000E+00  1.732E-07  3.782E-02  0.000E+00   0.0E+00
   20   22  8.118E+03  0.000E+00  0.000E+00  0.000E+00  9.732E-04  5.721E+00  0.000E+00   0.0E+00
   20   23  5.596E+03  0.000E+00  0.000E+00  0.000E+00  6.521E-03  0.000E+00  0.000E+00   0.0E+00
   20   24  5.429E+03  0.000E+00  0.000E+00  0.000E+00  5.222E-03  5.866E+01  0.000E+00   0.0E+00
   20   25  1.705E+03  0.000E+00  0.000E+00  0.000E+00  1.495E-03  1.265E+01  0.000E+00   0.0E+00
   20   26  1.525E+03  0.000E+00  0.000E+00  0.000E+00  2.170E-02  2.289E+02  0.000E+00   0.0E+00
   20   27  1.207E+03  0.000E+00  0.000E+00  0.000E+00  1.710E+00  1.232E+00  0.000E+00   0.0E+00
   20   28  1.148E+03  0.000E+00  0.000E+00  0.000E+00  6.262E-01  2.051E-01  0.000E+00   0.0E+00
   20   29  7.404E+02  0.000E+00  0.000E+00  0.000E+00  1.119E+02  1.080E+02  0.000E+00   0.0E+00
   20   30  7.202E+02  0.000E+00  0.000E+00  0.000E+00  1.978E+01  0.000E+00  0.000E+00   0.0E+00
   20   31  5.869E+02  0.000E+00  0.000E+00  0.000E+00  1.650E+01  5.751E+03  0.000E+00   0.0E+00
   20   32  5.438E+02  0.000E+00  0.000E+00  0.000E+00  9.253E+01  0.000E+00  0.000E+00   0.0E+00
   20   33  5.410E+02  6.430E+06  3.762E-04  4.020E-03  0.000E+00  0.000E+00  4.163E-02   3.6E-01
   20   34  5.376E+02  4.576E+07  1.983E-03  2.105E-02  0.000E+00  0.000E+00  6.095E-02   1.2E+00
   20   35  5.266E+02  4.680E+07  1.297E-03  1.349E-02  0.000E+00  0.000E+00  8.421E-03   1.0E+00
   20   36  5.127E+02  0.000E+00  0.000E+00  0.000E+00  0.000E+00  0.000E+00  1.535E-02   0.0E+00
   20   37  4.866E+02  0.000E+00  0.000E+00  0.000E+00  0.000E+00  0.000E+00  1.426E-01   0.0E+00
   20   38  4.661E+02  5.835E+06  2.535E-04  2.334E-03  0.000E+00  0.000E+00  1.412E-01   6.8E-01
   20   39  4.503E+02  0.000E+00  0.000E+00  0.000E+00  0.000E+00  0.000E+00  1.515E-02   0.0E+00
   20   40  4.362E+02  1.646E+08  4.696E-03  4.047E-02  0.000E+00  0.000E+00  1.024E-02   1.3E+00
   20   41  4.354E+02  4.480E+06  8.488E-05  7.300E-04  0.000E+00  0.000E+00  4.809E-02   5.1E-02
   20   42  4.238E+02  0.000E+00  0.000E+00  0.000E+00  0.000E+00  0.000E+00  6.696E-02   0.0E+00
   20   43  4.221E+02  1.632E+07  2.907E-04  2.424E-03  0.000E+00  0.000E+00  7.639E-02   1.5E+00
   20   44  4.223E+02  5.677E+09  2.024E-01  1.689E+00  0.000E+00  0.000E+00  2.811E+00   1.2E+00
   20   45  4.171E+02  5.682E+07  1.482E-03  1.221E-02  0.000E+00  0.000E+00  1.132E-02   1.6E+00
   20   46  4.064E+02  1.938E+08  3.199E-03  2.568E-02  0.000E+00  0.000E+00  3.036E-01   7.8E-01
   20   47  4.012E+02  1.154E+09  2.786E-02  2.208E-01  0.000E+00  0.000E+00  2.134E+00   1.0E+00
   20   48  3.814E+02  3.602E+07  5.237E-04  3.945E-03  0.000E+00  0.000E+00  1.767E-01   5.8E-01
   20   49  3.734E+02  2.670E+08  5.582E-03  4.118E-02  0.000E+00  0.000E+00  6.272E-03   6.9E-01
   20   50  3.361E+02  6.486E+05  1.465E-05  9.728E-05  0.000E+00  0.000E+00  2.474E-03   7.3E-01
   20   51  3.356E+02  0.000E+00  0.000E+00  0.000E+00  0.000E+00  0.000E+00  1.359E-02   0.0E+00
   20   52  3.138E+02  0.000E+00  0.000E+00  0.000E+00  0.000E+00  0.000E+00  7.391E-03   0.0E+00
   20   53  3.112E+02  1.138E+08  1.653E-03  1.016E-02  0.000E+00  0.000E+00  1.435E-01   7.3E-01
   20   54  3.077E+02  1.135E+07  2.148E-04  1.306E-03  0.000E+00  0.000E+00  1.939E-02   1.3E+00
   20   55  2.973E+02  2.786E+08  2.462E-03  1.446E-02  0.000E+00  0.000E+00  7.478E-02   2.9E-01
   20   56  2.955E+02  6.181E+08  8.093E-03  4.724E-02  0.000E+00  0.000E+00  1.770E-01   6.3E-01
   20   57  2.855E+02  4.630E+07  3.771E-04  2.127E-03  0.000E+00  0.000E+00  3.380E-01   6.3E-01
   20   58  2.856E+02  0.000E+00  0.000E+00  0.000E+00  0.000E+00  0.000E+00  2.136E-01   0.0E+00
   20   59  2.451E+02  1.796E+07  1.617E-04  7.828E-04  0.000E+00  0.000E+00  1.551E-02   9.5E-01
   20   60  2.410E+02  1.936E+06  1.124E-05  5.350E-05  0.000E+00  0.000E+00  1.970E-01   1.4E+00
   20   61  2.174E+02  0.000E+00  0.000E+00  0.000E+00  3.749E+02  1.432E+01  0.000E+00   0.0E+00
   20   62  2.093E+02  0.000E+00  0.000E+00  0.000E+00  2.733E+02  5.086E+00  0.000E+00   0.0E+00
   20   63  2.028E+02  0.000E+00  0.000E+00  0.000E+00  2.073E+03  0.000E+00  0.000E+00   0.0E+00
   20   64  1.941E+02  0.000E+00  0.000E+00  0.000E+00  5.925E+02  3.016E+01  0.000E+00   0.0E+00
   20   65  1.861E+02  0.000E+00  0.000E+00  0.000E+00  1.319E+00  0.000E+00  0.000E+00   0.0E+00
   20   66  1.609E+02  1.492E+08  3.860E-04  1.227E-03  0.000E+00  0.000E+00  6.317E-01   1.1E+00
   20   67  1.546E+02  3.768E+09  1.801E-02  5.502E-02  0.000E+00  0.000E+00  5.236E+00   8.6E-01
   20   68  1.544E+02  1.041E+09  3.720E-03  1.135E-02  0.000E+00  0.000E+00  3.255E-03   7.7E-01
   20   69  1.521E+02  7.947E+08  1.837E-03  5.517E-03  0.000E+00  0.000E+00  1.342E+00   9.8E-01
   20   70  1.498E+02  9.292E+09  3.125E-02  9.244E-02  0.000E+00  0.000E+00  5.296E-01   7.8E-01
   20   71  1.497E+02  0.000E+00  0.000E+00  0.000E+00  0.000E+00  0.000E+00  9.492E+00   0.0E+00
   20   72  1.473E+02  2.630E+07  5.700E-05  1.658E-04  0.000E+00  0.000E+00  7.436E+00   8.8E-01
   20   73  1.464E+02  9.343E+09  3.001E-02  8.676E-02  0.000E+00  0.000E+00  6.999E+00   8.5E-01
   20   74  1.458E+02  0.000E+00  0.000E+00  0.000E+00  0.000E+00  0.000E+00  2.301E+00   0.0E+00
   20   75  1.457E+02  6.819E+09  1.446E-02  4.163E-02  0.000E+00  0.000E+00  3.238E+01   7.2E-01
   20   76  1.443E+02  0.000E+00  0.000E+00  0.000E+00  0.000E+00  0.000E+00  3.569E+01   0.0E+00
   20   77  1.423E+02  1.741E+10  3.523E-02  9.901E-02  0.000E+00  0.000E+00  8.748E+00   7.7E-01
   20   78  1.366E+02  0.000E+00  0.000E+00  0.000E+00  5.401E+03  9.323E-02  0.000E+00   0.0E+00
   20   79  1.362E+02  0.000E+00  0.000E+00  0.000E+00  5.375E+03  0.000E+00  0.000E+00   0.0E+00
   20   80  1.348E+02  0.000E+00  0.000E+00  0.000E+00  0.000E+00  0.000E+00  3.369E+01   0.0E+00
   20   81  1.164E+02  0.000E+00  0.000E+00  0.000E+00  1.715E+03  0.000E+00  0.000E+00   0.0E+00
   20   82  1.158E+02  0.000E+00  0.000E+00  0.000E+00  5.353E-01  3.783E-02  0.000E+00   0.0E+00
   20   83  1.152E+02  0.000E+00  0.000E+00  0.000E+00  3.947E+04  0.000E+00  0.000E+00   0.0E+00
   20   84  1.148E+02  0.000E+00  0.000E+00  0.000E+00  2.063E+03  1.192E-02  0.000E+00   0.0E+00
   20   85  1.142E+02  0.000E+00  0.000E+00  0.000E+00  2.181E+03  1.241E-02  0.000E+00   0.0E+00
   20   86  1.131E+02  0.000E+00  0.000E+00  0.000E+00  2.415E+03  3.963E-01  0.000E+00   0.0E+00
   20   87  1.120E+02  0.000E+00  0.000E+00  0.000E+00  2.866E+03  1.003E-02  0.000E+00   0.0E+00
   20   88  1.112E+02  0.000E+00  0.000E+00  0.000E+00  5.760E+02  1.192E+00  0.000E+00   0.0E+00
   20   89  1.103E+02  3.720E+08  4.526E-04  9.863E-04  0.000E+00  0.000E+00  1.011E+00   5.7E-01
   20   90  1.097E+02  0.000E+00  0.000E+00  0.000E+00  2.461E+03  0.000E+00  0.000E+00   0.0E+00
   20   91  1.094E+02  6.638E+07  1.192E-04  2.576E-04  0.000E+00  0.000E+00  1.044E+02   2.0E-01
   20   92  1.094E+02  0.000E+00  0.000E+00  0.000E+00  1.206E+00  2.073E-01  0.000E+00   0.0E+00
   20   93  1.092E+02  0.000E+00  0.000E+00  0.000E+00  1.176E+03  7.848E+00  0.000E+00   0.0E+00
   20   94  1.092E+02  0.000E+00  0.000E+00  0.000E+00  5.007E+04  9.648E-01  0.000E+00   0.0E+00
   20   95  1.087E+02  0.000E+00  0.000E+00  0.000E+00  3.289E+04  2.859E+00  0.000E+00   0.0E+00
   20   96  1.080E+02  0.000E+00  0.000E+00  0.000E+00  0.000E+00  0.000E+00  3.070E+00   0.0E+00
   20   97  1.076E+02  2.675E+09  3.094E-03  6.575E-03  0.000E+00  0.000E+00  8.210E+01   5.5E-01
   20   98  1.075E+02  0.000E+00  0.000E+00  0.000E+00  1.522E+04  3.517E+00  0.000E+00   0.0E+00
   20   99  1.066E+02  0.000E+00  0.000E+00  0.000E+00  9.210E+02  1.315E+00  0.000E+00   0.0E+00
   20  100  1.052E+02  0.000E+00  0.000E+00  0.000E+00  0.000E+00  0.000E+00  1.204E+01   0.0E+00
   20  101  1.046E+02  0.000E+00  0.000E+00  0.000E+00  6.070E+03  0.000E+00  0.000E+00   0.0E+00
   20  102  1.025E+02  0.000E+00  0.000E+00  0.000E+00  4.458E+03  1.825E-02  0.000E+00   0.0E+00
   21   22  9.614E+03  0.000E+00  0.000E+00  0.000E+00  1.189E-04  6.161E-02  0.000E+00   0.0E+00
   21   23  6.268E+03  0.000E+00  0.000E+00  0.000E+00  1.163E-03  8.699E+00  0.000E+00   0.0E+00
   21   24  6.059E+03  0.000E+00  0.000E+00  0.000E+00  9.679E-05  2.041E+01  0.000E+00   0.0E+00
   21   25  1.762E+03  0.000E+00  0.000E+00  0.000E+00  3.913E-01  7.076E-03  0.000E+00   0.0E+00
   21   26  1.571E+03  0.000E+00  0.000E+00  0.000E+00  2.763E+00  0.000E+00  0.000E+00   0.0E+00
   21   27  1.236E+03  0.000E+00  0.000E+00  0.000E+00  8.862E-02  2.024E+02  0.000E+00   0.0E+00
   21   28  1.174E+03  0.000E+00  0.000E+00  0.000E+00  6.504E-01  3.253E+02  0.000E+00   0.0E+00
   21   29  7.510E+02  0.000E+00  0.000E+00  0.000E+00  1.125E+02  5.182E+01  0.000E+00   0.0E+00
   21   30  7.303E+02  0.000E+00  0.000E+00  0.000E+00  3.578E-01  3.812E+01  0.000E+00   0.0E+00
   21   31  5.936E+02  0.000E+00  0.000E+00  0.000E+00  5.621E+01  5.128E+02  0.000E+00   0.0E+00
   21   32  5.495E+02  0.000E+00  0.000E+00  0.000E+00  3.564E+01  1.418E+03  0.000E+00   0.0E+00
   21   33  5.467E+02  0.000E+00  0.000E+00  0.000E+00  0.000E+00  0.000E+00  1.644E-01   0.0E+00
   21   34  5.432E+02  3.408E+06  2.261E-04  1.617E-03  0.000E+00  0.000E+00  5.831E-04   1.9E+00
   21   35  5.320E+02  1.538E+07  6.524E-04  4.570E-03  0.000E+00  0.000E+00  1.896E-02   1.5E+00
   21   36  5.177E+02  1.133E+07  2.276E-04  1.552E-03  0.000E+00  0.000E+00  5.088E-02   1.4E+00
   21   38  4.704E+02  0.000E+00  0.000E+00  0.000E+00  0.000E+00  0.000E+00  3.188E-02   0.0E+00
   21   39  4.542E+02  2.058E+08  3.182E-03  1.903E-02  0.000E+00  0.000E+00  2.106E-01   8.5E-01
   21   40  4.399E+02  6.284E+07  2.735E-03  1.584E-02  0.000E+00  0.000E+00  7.872E-02   7.2E-01
   21   41  4.390E+02  1.620E+08  4.680E-03  2.706E-02  0.000E+00  0.000E+00  2.458E-02   9.5E-01
   21   42  4.273E+02  9.209E+08  1.260E-02  7.092E-02  0.000E+00  0.000E+00  1.804E-01   9.0E-01
   21   43  4.256E+02  2.427E+07  6.589E-04  3.692E-03  0.000E+00  0.000E+00  9.358E-02   1.7E+00
   21   44  4.258E+02  0.000E+00  0.000E+00  0.000E+00  0.000E+00  0.000E+00  1.396E-01   0.0E+00
   21   45  4.205E+02  1.013E+09  4.029E-02  2.231E-01  0.000E+00  0.000E+00  6.052E-03   1.1E+00
   21   46  4.095E+02  2.380E+09  5.985E-02  3.227E-01  0.000E+00  0.000E+00  5.029E-01   9.4E-01
   21   47  4.044E+02  1.966E+09  7.231E-02  3.850E-01  0.000E+00  0.000E+00  6.109E-01   1.1E+00
   21   48  3.842E+02  4.511E+08  9.981E-03  5.050E-02  0.000E+00  0.000E+00  3.352E-02   8.9E-01
   21   49  3.761E+02  7.998E+08  2.544E-02  1.260E-01  0.000E+00  0.000E+00  1.088E-01   6.8E-01
   21   50  3.383E+02  0.000E+00  0.000E+00  0.000E+00  0.000E+00  0.000E+00  3.004E-04   0.0E+00
   21   52  3.156E+02  2.643E+09  1.974E-02  8.205E-02  0.000E+00  0.000E+00  1.345E+00   8.6E-01
   21   53  3.131E+02  2.390E+05  5.268E-06  2.172E-05  0.000E+00  0.000E+00  2.093E-01   6.2E+00
   21   54  3.095E+02  0.000E+00  0.000E+00  0.000E+00  0.000E+00  0.000E+00  5.459E-01   0.0E+00
   21   55  2.990E+02  7.889E+08  1.057E-02  4.164E-02  0.000E+00  0.000E+00  7.222E-01   9.0E-01
   21   56  2.972E+02  3.996E+07  7.937E-04  3.106E-03  0.000E+00  0.000E+00  2.033E-01   4.6E+00
   21   57  2.870E+02  9.978E+07  1.232E-03  4.658E-03  0.000E+00  0.000E+00  4.667E+00   2.3E-01
   21   58  2.871E+02  2.568E+05  1.587E-06  6.002E-06  0.000E+00  0.000E+00  1.129E+01   1.1E+02
   21   59  2.462E+02  2.732E+06  3.725E-05  1.208E-04  0.000E+00  0.000E+00  7.541E-01   5.7E+00
   21   60  2.421E+02  8.927E+07  7.846E-04  2.502E-03  0.000E+00  0.000E+00  5.269E-01   3.7E-01
   21   61  2.184E+02  0.000E+00  0.000E+00  0.000E+00  1.076E+02  6.661E-01  0.000E+00   0.0E+00
   21   62  2.102E+02  0.000E+00  0.000E+00  0.000E+00  1.313E+02  1.102E-01  0.000E+00   0.0E+00
   21   63  2.036E+02  0.000E+00  0.000E+00  0.000E+00  7.813E+01  2.404E+00  0.000E+00   0.0E+00
   21   64  1.949E+02  0.000E+00  0.000E+00  0.000E+00  1.086E+03  7.617E+00  0.000E+00   0.0E+00
   21   65  1.868E+02  0.000E+00  0.000E+00  0.000E+00  7.084E+01  2.359E+01  0.000E+00   0.0E+00
   21   66  1.614E+02  1.216E+09  4.748E-03  1.009E-02  0.000E+00  0.000E+00  1.212E+01   7.4E-01
   21   67  1.551E+02  0.000E+00  0.000E+00  0.000E+00  0.000E+00  0.000E+00  4.263E-02   0.0E+00
   21   68  1.549E+02  6.688E+08  3.607E-03  7.356E-03  0.000E+00  0.000E+00  5.557E-01   8.5E-01
   21   69  1.525E+02  1.205E+07  4.200E-05  8.436E-05  0.000E+00  0.000E+00  8.945E-01   1.0E+00
   21   70  1.502E+02  9.600E+08  4.870E-03  9.633E-03  0.000E+00  0.000E+00  1.875E+01   1.1E+00
   21   71  1.501E+02  1.676E+09  2.831E-03  5.596E-03  0.000E+00  0.000E+00  2.596E-01   9.0E-01
   21   72  1.477E+02  6.844E+09  2.237E-02  4.351E-02  0.000E+00  0.000E+00  3.412E+00   9.1E-01
   21   73  1.468E+02  5.218E+08  2.528E-03  4.887E-03  0.000E+00  0.000E+00  6.374E+00   9.4E-01
   21   74  1.462E+02  1.131E+08  1.812E-04  3.488E-04  0.000E+00  0.000E+00  1.326E+01   6.4E-01
   21   75  1.461E+02  9.394E+09  3.006E-02  5.783E-02  0.000E+00  0.000E+00  2.112E+00   8.6E-01
   21   76  1.447E+02  3.097E+09  4.860E-03  9.261E-03  0.000E+00  0.000E+00  4.244E+00   5.9E-01
   21   77  1.427E+02  1.865E+09  5.690E-03  1.069E-02  0.000E+00  0.000E+00  2.543E+01   9.1E-01
   21   78  1.370E+02  0.000E+00  0.000E+00  0.000E+00  3.670E+03  2.090E+00  0.000E+00   0.0E+00
   21   79  1.366E+02  0.000E+00  0.000E+00  0.000E+00  5.949E+01  3.931E+00  0.000E+00   0.0E+00
   21   80  1.352E+02  2.414E+10  3.305E-02  5.883E-02  0.000E+00  0.000E+00  4.637E+00   6.9E-01
   21   81  1.167E+02  0.000E+00  0.000E+00  0.000E+00  7.540E+00  1.691E-02  0.000E+00   0.0E+00
   21   82  1.161E+02  0.000E+00  0.000E+00  0.000E+00  6.903E+01  1.250E+00  0.000E+00   0.0E+00
   21   84  1.151E+02  0.000E+00  0.000E+00  0.000E+00  1.320E+03  1.849E+00  0.000E+00   0.0E+00
   21   85  1.145E+02  0.000E+00  0.000E+00  0.000E+00  7.860E+00  0.000E+00  0.000E+00   0.0E+00
   21   86  1.133E+02  0.000E+00  0.000E+00  0.000E+00  9.175E+02  2.260E-04  0.000E+00   0.0E+00
   21   87  1.123E+02  0.000E+00  0.000E+00  0.000E+00  6.030E+03  8.738E-01  0.000E+00   0.0E+00
   21   88  1.114E+02  0.000E+00  0.000E+00  0.000E+00  2.808E+04  0.000E+00  0.000E+00   0.0E+00
   21   89  1.106E+02  9.247E+08  1.695E-03  2.468E-03  0.000E+00  0.000E+00  4.434E+00   6.8E-01
   21   90  1.099E+02  0.000E+00  0.000E+00  0.000E+00  1.672E+04  8.198E-03  0.000E+00   0.0E+00
   21   91  1.097E+02  6.265E+08  1.694E-03  2.447E-03  0.000E+00  0.000E+00  9.016E+01   1.2E+00
   21   92  1.097E+02  0.000E+00  0.000E+00  0.000E+00  3.679E+03  8.358E-01  0.000E+00   0.0E+00
   21   93  1.095E+02  0.000E+00  0.000E+00  0.000E+00  5.624E+02  2.409E-02  0.000E+00   0.0E+00
   21   94  1.094E+02  0.000E+00  0.000E+00  0.000E+00  3.247E+04  0.000E+00  0.000E+00   0.0E+00
   21   95  1.089E+02  0.000E+00  0.000E+00  0.000E+00  4.724E+04  4.085E-01  0.000E+00   0.0E+00
   21   96  1.082E+02  3.200E+09  2.809E-03  4.003E-03  0.000E+00  0.000E+00  2.528E-03   3.8E-01
   21   97  1.078E+02  3.430E+09  5.976E-03  8.484E-03  0.000E+00  0.000E+00  4.187E+01   3.1E-01
   21   98  1.077E+02  0.000E+00  0.000E+00  0.000E+00  3.436E+04  5.330E-02  0.000E+00   0.0E+00
   21   99  1.068E+02  0.000E+00  0.000E+00  0.000E+00  2.806E+04  1.141E+00  0.000E+00   0.0E+00
   21  100  1.054E+02  7.377E+09  6.144E-03  8.528E-03  0.000E+00  0.000E+00  4.903E+01   5.7E-01
   21  101  1.048E+02  0.000E+00  0.000E+00  0.000E+00  5.598E+00  9.416E-02  0.000E+00   0.0E+00
   21  102  1.027E+02  0.000E+00  0.000E+00  0.000E+00  2.600E+04  8.211E-02  0.000E+00   0.0E+00
   22   23  1.801E+04  0.000E+00  0.000E+00  0.000E+00  4.085E-06  7.474E-02  0.000E+00   0.0E+00
   22   24  1.638E+04  0.000E+00  0.000E+00  0.000E+00  1.603E-05  2.683E+00  0.000E+00   0.0E+00
   22   25  2.158E+03  0.000E+00  0.000E+00  0.000E+00  3.642E-03  1.525E+00  0.000E+00   0.0E+00
   22   26  1.878E+03  0.000E+00  0.000E+00  0.000E+00  1.020E-01  0.000E+00  0.000E+00   0.0E+00
   22   27  1.418E+03  0.000E+00  0.000E+00  0.000E+00  1.906E-02  9.981E+00  0.000E+00   0.0E+00
   22   28  1.337E+03  0.000E+00  0.000E+00  0.000E+00  8.153E-03  6.782E-01  0.000E+00   0.0E+00
   22   29  8.147E+02  0.000E+00  0.000E+00  0.000E+00  1.849E+00  4.692E+02  0.000E+00   0.0E+00
   22   30  7.904E+02  0.000E+00  0.000E+00  0.000E+00  1.043E+01  7.511E+02  0.000E+00   0.0E+00
   22   31  6.327E+02  0.000E+00  0.000E+00  0.000E+00  2.829E-01  6.568E+02  0.000E+00   0.0E+00
   22   32  5.828E+02  0.000E+00  0.000E+00  0.000E+00  4.232E+01  1.049E+02  0.000E+00   0.0E+00
   22   33  5.796E+02  0.000E+00  0.000E+00  0.000E+00  0.000E+00  0.000E+00  3.664E-02   0.0E+00
   22   34  5.757E+02  1.329E+06  9.907E-05  7.511E-04  0.000E+00  0.000E+00  5.404E-02   1.6E+00
   22   35  5.631E+02  5.120E+06  2.434E-04  1.805E-03  0.000E+00  0.000E+00  1.940E-02   1.2E+00
   22   36  5.472E+02  1.784E+07  4.004E-04  2.885E-03  0.000E+00  0.000E+00  8.240E-02   1.3E+00
   22   38  4.945E+02  0.000E+00  0.000E+00  0.000E+00  0.000E+00  0.000E+00  3.040E-03   0.0E+00
   22   39  4.767E+02  9.806E+08  1.670E-02  1.049E-01  0.000E+00  0.000E+00  2.440E-01   1.2E+00
   22   40  4.610E+02  7.126E+07  3.406E-03  2.068E-02  0.000E+00  0.000E+00  6.874E-03   1.2E+00
   22   41  4.600E+02  1.254E+09  3.979E-02  2.410E-01  0.000E+00  0.000E+00  3.597E-01   1.1E+00
   22   42  4.472E+02  5.571E+07  8.351E-04  4.917E-03  0.000E+00  0.000E+00  3.755E-01   1.3E+00
   22   43  4.453E+02  2.097E+08  6.233E-03  3.655E-02  0.000E+00  0.000E+00  2.533E-02   1.2E+00
   22   44  4.455E+02  0.000E+00  0.000E+00  0.000E+00  0.000E+00  0.000E+00  1.374E-03   0.0E+00
   22   45  4.397E+02  2.681E+09  1.166E-01  6.752E-01  0.000E+00  0.000E+00  1.572E+00   1.1E+00
   22   46  4.278E+02  2.719E+08  7.459E-03  4.202E-02  0.000E+00  0.000E+00  6.965E-03   1.1E+00
   22   47  4.221E+02  3.684E+08  1.476E-02  8.206E-02  0.000E+00  0.000E+00  1.784E-01   8.6E-01
   22   48  4.002E+02  4.871E+07  1.170E-03  6.163E-03  0.000E+00  0.000E+00  2.999E-01   7.3E-01
   22   49  3.914E+02  1.240E+09  4.273E-02  2.203E-01  0.000E+00  0.000E+00  8.063E-01   1.0E+00
   22   50  3.507E+02  0.000E+00  0.000E+00  0.000E+00  0.000E+00  0.000E+00  1.721E-03   0.0E+00
   22   52  3.264E+02  2.473E+08  1.975E-03  8.486E-03  0.000E+00  0.000E+00  2.554E-01   6.4E-01
   22   53  3.236E+02  1.483E+06  3.493E-05  1.489E-04  0.000E+00  0.000E+00  1.506E-02   1.7E+00
   22   54  3.198E+02  0.000E+00  0.000E+00  0.000E+00  0.000E+00  0.000E+00  1.763E-02   0.0E+00
   22   55  3.086E+02  3.179E+07  4.539E-04  1.845E-03  0.000E+00  0.000E+00  1.069E+00   6.2E-01
   22   56  3.067E+02  1.725E+07  3.649E-04  1.474E-03  0.000E+00  0.000E+00  2.840E-01   2.5E-01
   22   57  2.959E+02  8.648E+07  1.135E-03  4.422E-03  0.000E+00  0.000E+00  4.173E-01   7.8E-01
   22   58  2.960E+02  7.993E+07  5.249E-04  2.046E-03  0.000E+00  0.000E+00  1.936E-01   3.0E-01
   22   59  2.527E+02  6.784E+06  9.743E-05  3.242E-04  0.000E+00  0.000E+00  3.458E-05   7.5E-01
   22   60  2.484E+02  2.198E+06  2.033E-05  6.650E-05  0.000E+00  0.000E+00  1.061E-01   4.1E-01
   22   61  2.234E+02  0.000E+00  0.000E+00  0.000E+00  2.236E+01  1.910E+00  0.000E+00   0.0E+00
   22   62  2.149E+02  0.000E+00  0.000E+00  0.000E+00  1.243E+02  1.983E+01  0.000E+00   0.0E+00
   22   63  2.080E+02  0.000E+00  0.000E+00  0.000E+00  5.093E+01  7.714E+01  0.000E+00   0.0E+00
   22   64  1.989E+02  0.000E+00  0.000E+00  0.000E+00  1.630E+01  3.480E+00  0.000E+00   0.0E+00
   22   65  1.905E+02  0.000E+00  0.000E+00  0.000E+00  8.126E+01  1.007E-01  0.000E+00   0.0E+00
   22   66  1.642E+02  1.855E+08  7.493E-04  1.620E-03  0.000E+00  0.000E+00  2.079E-01   5.6E-01
   22   67  1.576E+02  0.000E+00  0.000E+00  0.000E+00  0.000E+00  0.000E+00  2.450E+00   0.0E+00
   22   68  1.574E+02  4.185E+08  2.331E-03  4.832E-03  0.000E+00  0.000E+00  3.650E+00   8.6E-01
   22   69  1.550E+02  5.698E+08  2.051E-03  4.186E-03  0.000E+00  0.000E+00  4.716E+00   9.0E-01
   22   70  1.526E+02  2.838E+09  1.486E-02  2.985E-02  0.000E+00  0.000E+00  2.721E+01   9.5E-01
   22   71  1.525E+02  1.128E+09  1.967E-03  3.950E-03  0.000E+00  0.000E+00  2.069E+00   9.5E-01
   22   72  1.500E+02  5.803E+08  1.957E-03  3.865E-03  0.000E+00  0.000E+00  1.897E+01   1.0E+00
   22   73  1.491E+02  9.092E+09  4.543E-02  8.918E-02  0.000E+00  0.000E+00  7.439E+00   9.1E-01
   22   74  1.484E+02  2.739E+09  4.524E-03  8.843E-03  0.000E+00  0.000E+00  1.594E-01   1.1E+00
   22   75  1.484E+02  1.025E+10  3.383E-02  6.609E-02  0.000E+00  0.000E+00  6.299E-03   9.0E-01
   22   76  1.469E+02  7.439E+07  1.203E-04  2.328E-04  0.000E+00  0.000E+00  6.032E-02   7.6E-01
   22   77  1.448E+02  1.620E+08  5.094E-04  9.714E-04  0.000E+00  0.000E+00  4.775E-01   1.1E+00
   22   78  1.389E+02  0.000E+00  0.000E+00  0.000E+00  1.449E+02  1.539E+01  0.000E+00   0.0E+00
   22   79  1.385E+02  0.000E+00  0.000E+00  0.000E+00  1.449E+03  4.217E+00  0.000E+00   0.0E+00
   22   80  1.371E+02  3.017E+09  4.250E-03  7.673E-03  0.000E+00  0.000E+00  2.127E-02   5.9E-01
   22   81  1.181E+02  0.000E+00  0.000E+00  0.000E+00  5.489E+02  9.464E-01  0.000E+00   0.0E+00
   22   82  1.175E+02  0.000E+00  0.000E+00  0.000E+00  3.070E+03  8.120E-01  0.000E+00   0.0E+00
   22   84  1.164E+02  0.000E+00  0.000E+00  0.000E+00  8.820E+03  2.690E+00  0.000E+00   0.0E+00
   22   85  1.159E+02  0.000E+00  0.000E+00  0.000E+00  4.770E+01  0.000E+00  0.000E+00   0.0E+00
   22   86  1.147E+02  0.000E+00  0.000E+00  0.000E+00  5.448E+02  3.848E-04  0.000E+00   0.0E+00
   22   87  1.136E+02  0.000E+00  0.000E+00  0.000E+00  8.912E+02  7.652E-03  0.000E+00   0.0E+00
   22   88  1.128E+02  0.000E+00  0.000E+00  0.000E+00  7.106E+04  0.000E+00  0.000E+00   0.0E+00
   22   89  1.118E+02  1.395E+08  2.617E-04  3.855E-04  0.000E+00  0.000E+00  2.189E+00   3.5E-01
   22   90  1.112E+02  0.000E+00  0.000E+00  0.000E+00  6.919E+04  8.504E-01  0.000E+00   0.0E+00
   22   91  1.109E+02  2.679E+06  7.413E-06  1.083E-05  0.000E+00  0.000E+00  1.214E+00   1.8E+01
   22   92  1.109E+02  0.000E+00  0.000E+00  0.000E+00  9.259E+04  1.588E-03  0.000E+00   0.0E+00
   22   93  1.107E+02  0.000E+00  0.000E+00  0.000E+00  7.499E+04  1.094E-02  0.000E+00   0.0E+00
   22   94  1.107E+02  0.000E+00  0.000E+00  0.000E+00  1.131E+05  0.000E+00  0.000E+00   0.0E+00
   22   95  1.102E+02  0.000E+00  0.000E+00  0.000E+00  8.894E+03  2.261E-02  0.000E+00   0.0E+00
   22   96  1.094E+02  1.466E+09  1.316E-03  1.897E-03  0.000E+00  0.000E+00  1.157E+02   7.8E-01
   22   97  1.090E+02  1.966E+09  3.504E-03  5.030E-03  0.000E+00  0.000E+00  4.938E+01   9.1E-01
   22   98  1.090E+02  0.000E+00  0.000E+00  0.000E+00  1.592E+03  5.857E-01  0.000E+00   0.0E+00
   22   99  1.080E+02  0.000E+00  0.000E+00  0.000E+00  4.994E+02  3.022E-01  0.000E+00   0.0E+00
   22  100  1.066E+02  8.890E+08  7.568E-04  1.062E-03  0.000E+00  0.000E+00  2.876E-01   1.7E-01
   22  101  1.059E+02  0.000E+00  0.000E+00  0.000E+00  7.285E+03  1.708E-02  0.000E+00   0.0E+00
   22  102  1.038E+02  0.000E+00  0.000E+00  0.000E+00  2.365E+01  1.660E+00  0.000E+00   0.0E+00
   23   24  1.817E+05  0.000E+00  0.000E+00  0.000E+00  3.940E-10  9.083E-05  0.000E+00   0.0E+00
   23   25  2.452E+03  0.000E+00  0.000E+00  0.000E+00  9.768E-02  0.000E+00  0.000E+00   0.0E+00
   23   27  1.539E+03  0.000E+00  0.000E+00  0.000E+00  6.500E-02  2.475E+01  0.000E+00   0.0E+00
   23   28  1.444E+03  0.000E+00  0.000E+00  0.000E+00  4.667E-01  0.000E+00  0.000E+00   0.0E+00
   23   29  8.533E+02  0.000E+00  0.000E+00  0.000E+00  8.278E+00  1.771E+01  0.000E+00   0.0E+00
   23   30  8.266E+02  0.000E+00  0.000E+00  0.000E+00  0.000E+00  4.318E+02  0.000E+00   0.0E+00
   23   31  6.557E+02  0.000E+00  0.000E+00  0.000E+00  8.890E+00  9.015E+02  0.000E+00   0.0E+00
   23   32  6.023E+02  0.000E+00  0.000E+00  0.000E+00  0.000E+00  5.691E+02  0.000E+00   0.0E+00
   23   34  5.947E+02  0.000E+00  0.000E+00  0.000E+00  0.000E+00  0.000E+00  1.275E-03   0.0E+00
   23   35  5.813E+02  7.303E+06  7.399E-04  2.832E-03  0.000E+00  0.000E+00  2.654E-03   1.1E+00
   23   36  5.643E+02  1.190E+07  5.681E-04  2.111E-03  0.000E+00  0.000E+00  0.000E+00   1.4E+00
   23   39  4.897E+02  7.482E+06  2.690E-04  8.671E-04  0.000E+00  0.000E+00  0.000E+00   1.0E+00
   23   40  4.731E+02  0.000E+00  0.000E+00  0.000E+00  0.000E+00  0.000E+00  3.608E-02   0.0E+00
   23   41  4.721E+02  8.078E+06  5.398E-04  1.678E-03  0.000E+00  0.000E+00  2.797E-02   1.7E+00
   23   42  4.585E+02  2.721E+08  8.579E-03  2.590E-02  0.000E+00  0.000E+00  0.000E+00   1.1E+00
   23   43  4.566E+02  2.094E+07  1.308E-03  3.933E-03  0.000E+00  0.000E+00  4.714E-03   1.2E+00
   23   45  4.507E+02  0.000E+00  0.000E+00  0.000E+00  0.000E+00  0.000E+00  5.382E-01   0.0E+00
   23   46  4.382E+02  4.345E+06  2.501E-04  7.216E-04  0.000E+00  0.000E+00  1.703E-01   1.4E+00
   23   47  4.322E+02  0.000E+00  0.000E+00  0.000E+00  0.000E+00  0.000E+00  4.355E-01   0.0E+00
   23   48  4.093E+02  3.799E+09  1.908E-01  5.141E-01  0.000E+00  0.000E+00  3.963E-04   9.7E-01
   23   49  4.001E+02  0.000E+00  0.000E+00  0.000E+00  0.000E+00  0.000E+00  1.428E-01   0.0E+00
   23   52  3.324E+02  1.031E+08  1.708E-03  3.738E-03  0.000E+00  0.000E+00  0.000E+00   9.6E-01
   23   53  3.296E+02  0.000E+00  0.000E+00  0.000E+00  0.000E+00  0.000E+00  3.839E-01   0.0E+00
   23   55  3.140E+02  1.662E+09  4.914E-02  1.016E-01  0.000E+00  0.000E+00  1.615E-01   6.5E-01
   23   56  3.120E+02  0.000E+00  0.000E+00  0.000E+00  0.000E+00  0.000E+00  6.011E-02   0.0E+00
   23   57  3.008E+02  1.431E+07  3.883E-04  7.690E-04  0.000E+00  0.000E+00  1.350E+00   4.3E-04
   23   58  3.009E+02  3.678E+09  4.994E-02  9.895E-02  0.000E+00  0.000E+00  0.000E+00   7.1E-01
   23   59  2.563E+02  0.000E+00  0.000E+00  0.000E+00  0.000E+00  0.000E+00  1.577E-05   0.0E+00
   23   60  2.519E+02  1.959E+07  3.726E-04  6.178E-04  0.000E+00  0.000E+00  1.252E-01   9.1E-03
   23   61  2.262E+02  0.000E+00  0.000E+00  0.000E+00  2.111E-02  0.000E+00  0.000E+00   0.0E+00
   23   62  2.175E+02  0.000E+00  0.000E+00  0.000E+00  2.729E+00  3.259E+00  0.000E+00   0.0E+00
   23   63  2.104E+02  0.000E+00  0.000E+00  0.000E+00  0.000E+00  8.528E-02  0.000E+00   0.0E+00
   23   64  2.011E+02  0.000E+00  0.000E+00  0.000E+00  2.254E+02  4.877E+00  0.000E+00   0.0E+00
   23   65  1.926E+02  0.000E+00  0.000E+00  0.000E+00  0.000E+00  3.092E+00  0.000E+00   0.0E+00
   23   66  1.657E+02  2.003E+07  1.649E-04  1.799E-04  0.000E+00  0.000E+00  4.555E+00   7.6E-01
   23   68  1.588E+02  0.000E+00  0.000E+00  0.000E+00  0.000E+00  0.000E+00  1.338E+00   0.0E+00
   23   69  1.563E+02  1.270E+09  9.302E-03  9.573E-03  0.000E+00  0.000E+00  2.401E-01   8.1E-01
   23   70  1.539E+02  0.000E+00  0.000E+00  0.000E+00  0.000E+00  0.000E+00  5.216E-01   0.0E+00
   23   71  1.538E+02  2.942E+07  1.044E-04  1.057E-04  0.000E+00  0.000E+00  0.000E+00   3.8E-01
   23   72  1.512E+02  6.617E+09  4.538E-02  4.519E-02  0.000E+00  0.000E+00  6.499E+00   8.6E-01
   23   73  1.503E+02  0.000E+00  0.000E+00  0.000E+00  0.000E+00  0.000E+00  5.575E+00   0.0E+00
   23   74  1.497E+02  4.290E+07  1.441E-04  1.420E-04  0.000E+00  0.000E+00  0.000E+00   1.2E+00
   23   75  1.496E+02  3.416E+07  2.292E-04  2.257E-04  0.000E+00  0.000E+00  6.836E+00   7.1E-01
   23   76  1.481E+02  2.453E+09  8.068E-03  7.868E-03  0.000E+00  0.000E+00  0.000E+00   8.8E-01
   23   77  1.460E+02  5.913E+09  3.779E-02  3.632E-02  0.000E+00  0.000E+00  1.592E+00   9.0E-01
   23   78  1.400E+02  0.000E+00  0.000E+00  0.000E+00  2.205E+02  7.582E+00  0.000E+00   0.0E+00
   23   79  1.396E+02  0.000E+00  0.000E+00  0.000E+00  0.000E+00  3.005E+01  0.000E+00   0.0E+00
   23   80  1.381E+02  7.468E+09  2.136E-02  1.943E-02  0.000E+00  0.000E+00  0.000E+00   7.7E-01
   23   81  1.189E+02  0.000E+00  0.000E+00  0.000E+00  0.000E+00  1.934E-01  0.000E+00   0.0E+00
   23   82  1.183E+02  0.000E+00  0.000E+00  0.000E+00  1.140E+02  1.359E+00  0.000E+00   0.0E+00
   23   84  1.172E+02  0.000E+00  0.000E+00  0.000E+00  4.315E+02  0.000E+00  0.000E+00   0.0E+00
   23   86  1.154E+02  0.000E+00  0.000E+00  0.000E+00  3.278E+03  0.000E+00  0.000E+00   0.0E+00
   23   87  1.143E+02  0.000E+00  0.000E+00  0.000E+00  2.295E+03  4.142E-02  0.000E+00   0.0E+00
   23   89  1.126E+02  2.443E+08  9.279E-04  6.876E-04  0.000E+00  0.000E+00  3.043E+00   1.8E+00
   23   90  1.119E+02  0.000E+00  0.000E+00  0.000E+00  0.000E+00  3.344E-02  0.000E+00   0.0E+00
   23   91  1.116E+02  0.000E+00  0.000E+00  0.000E+00  0.000E+00  0.000E+00  1.137E+01   0.0E+00
   23   92  1.116E+02  0.000E+00  0.000E+00  0.000E+00  3.182E+03  0.000E+00  0.000E+00   0.0E+00
   23   93  1.114E+02  0.000E+00  0.000E+00  0.000E+00  8.836E+02  1.004E-02  0.000E+00   0.0E+00
   23   95  1.109E+02  0.000E+00  0.000E+00  0.000E+00  1.936E+04  0.000E+00  0.000E+00   0.0E+00
   23   96  1.101E+02  2.098E+09  3.815E-03  2.766E-03  0.000E+00  0.000E+00  0.000E+00   2.5E-01
   23   97  1.097E+02  1.801E+06  6.497E-06  4.692E-06  0.000E+00  0.000E+00  4.170E+01   1.7E+01
   23   98  1.096E+02  0.000E+00  0.000E+00  0.000E+00  4.481E+04  3.640E-01  0.000E+00   0.0E+00
   23   99  1.086E+02  0.000E+00  0.000E+00  0.000E+00  1.334E+05  0.000E+00  0.000E+00   0.0E+00
   23  100  1.072E+02  2.251E+09  3.879E-03  2.738E-03  0.000E+00  0.000E+00  0.000E+00   7.2E-01
   23  101  1.066E+02  0.000E+00  0.000E+00  0.000E+00  0.000E+00  3.580E+00  0.000E+00   0.0E+00
   23  102  1.044E+02  0.000E+00  0.000E+00  0.000E+00  9.091E+03  3.617E-01  0.000E+00   0.0E+00
   24   25  2.485E+03  0.000E+00  0.000E+00  0.000E+00  3.838E-03  1.181E+01  0.000E+00   0.0E+00
   24   26  2.120E+03  0.000E+00  0.000E+00  0.000E+00  2.895E-01  0.000E+00  0.000E+00   0.0E+00
   24   27  1.552E+03  0.000E+00  0.000E+00  0.000E+00  8.629E-03  9.264E+01  0.000E+00   0.0E+00
   24   28  1.456E+03  0.000E+00  0.000E+00  0.000E+00  3.627E-01  2.635E+00  0.000E+00   0.0E+00
   24   29  8.573E+02  0.000E+00  0.000E+00  0.000E+00  1.698E+01  4.372E+02  0.000E+00   0.0E+00
   24   30  8.304E+02  0.000E+00  0.000E+00  0.000E+00  5.843E+01  4.035E+01  0.000E+00   0.0E+00
   24   31  6.581E+02  0.000E+00  0.000E+00  0.000E+00  4.597E-01  2.092E+03  0.000E+00   0.0E+00
   24   32  6.043E+02  0.000E+00  0.000E+00  0.000E+00  3.379E+02  3.626E+02  0.000E+00   0.0E+00
   24   33  6.009E+02  0.000E+00  0.000E+00  0.000E+00  0.000E+00  0.000E+00  3.755E-02   0.0E+00
   24   34  5.967E+02  2.484E+06  1.989E-04  1.563E-03  0.000E+00  0.000E+00  1.005E-03   1.1E+00
   24   35  5.832E+02  2.515E+05  1.282E-05  9.847E-05  0.000E+00  0.000E+00  2.234E-02   2.7E+00
   24   36  5.661E+02  1.874E+05  4.502E-06  3.357E-05  0.000E+00  0.000E+00  6.478E-03   1.4E+00
   24   38  5.099E+02  0.000E+00  0.000E+00  0.000E+00  0.000E+00  0.000E+00  4.150E-02   0.0E+00
   24   39  4.910E+02  1.991E+08  3.598E-03  2.327E-02  0.000E+00  0.000E+00  1.576E-02   1.4E+00
   24   40  4.744E+02  3.693E+06  1.869E-04  1.168E-03  0.000E+00  0.000E+00  5.902E-02   1.5E-03
   24   41  4.733E+02  2.948E+08  9.904E-03  6.173E-02  0.000E+00  0.000E+00  1.147E-01   1.1E+00
   24   42  4.597E+02  8.300E+06  1.315E-04  7.959E-04  0.000E+00  0.000E+00  2.441E-02   2.6E-01
   24   43  4.577E+02  1.038E+07  3.259E-04  1.964E-03  0.000E+00  0.000E+00  1.096E-01   1.4E+00
   24   44  4.580E+02  0.000E+00  0.000E+00  0.000E+00  0.000E+00  0.000E+00  4.540E-01   0.0E+00
   24   45  4.519E+02  8.570E+06  3.935E-04  2.342E-03  0.000E+00  0.000E+00  1.315E-01   5.9E-02
   24   46  4.392E+02  4.621E+07  1.337E-03  7.730E-03  0.000E+00  0.000E+00  1.094E-01   1.1E+00
   24   47  4.333E+02  2.242E+09  9.467E-02  5.401E-01  0.000E+00  0.000E+00  6.175E-01   1.3E+00
   24   48  4.102E+02  9.143E+08  2.307E-02  1.246E-01  0.000E+00  0.000E+00  1.248E+00   8.8E-01
   24   49  4.010E+02  2.981E+09  1.078E-01  5.692E-01  0.000E+00  0.000E+00  7.399E-01   1.0E+00
   24   50  3.583E+02  0.000E+00  0.000E+00  0.000E+00  0.000E+00  0.000E+00  1.326E-02   0.0E+00
   24   52  3.330E+02  1.020E+09  8.482E-03  3.720E-02  0.000E+00  0.000E+00  2.899E-01   8.1E-01
   24   53  3.302E+02  5.894E+05  1.445E-05  6.282E-05  0.000E+00  0.000E+00  1.576E-01   4.2E+00
   24   54  3.262E+02  0.000E+00  0.000E+00  0.000E+00  0.000E+00  0.000E+00  5.275E-05   0.0E+00
   24   55  3.145E+02  1.228E+08  1.821E-03  7.542E-03  0.000E+00  0.000E+00  7.073E-02   1.4E+00
   24   56  3.125E+02  5.636E+07  1.238E-03  5.094E-03  0.000E+00  0.000E+00  1.484E-01   9.1E-02
   24   57  3.013E+02  9.029E+08  1.229E-02  4.876E-02  0.000E+00  0.000E+00  2.171E-02   7.4E-01
   24   58  3.014E+02  6.421E+08  4.374E-03  1.736E-02  0.000E+00  0.000E+00  2.168E+00   3.8E-01
   24   59  2.567E+02  9.385E+05  1.390E-05  4.700E-05  0.000E+00  0.000E+00  4.401E-02   1.9E+00
   24   60  2.522E+02  1.008E+08  9.610E-04  3.192E-03  0.000E+00  0.000E+00  2.869E-01   5.6E-01
   24   61  2.265E+02  0.000E+00  0.000E+00  0.000E+00  1.160E+01  1.164E+01  0.000E+00   0.0E+00
   24   62  2.177E+02  0.000E+00  0.000E+00  0.000E+00  4.788E+01  7.335E+00  0.000E+00   0.0E+00
   24   63  2.107E+02  0.000E+00  0.000E+00  0.000E+00  5.207E+00  1.409E+01  0.000E+00   0.0E+00
   24   64  2.013E+02  0.000E+00  0.000E+00  0.000E+00  1.163E+02  2.589E+00  0.000E+00   0.0E+00
   24   65  1.928E+02  0.000E+00  0.000E+00  0.000E+00  1.135E+03  8.796E+00  0.000E+00   0.0E+00
   24   66  1.658E+02  6.870E+07  2.832E-04  6.185E-04  0.000E+00  0.000E+00  4.691E-01   1.0E+00
   24   67  1.592E+02  0.000E+00  0.000E+00  0.000E+00  0.000E+00  0.000E+00  4.761E+00   0.0E+00
   24   68  1.589E+02  2.755E+07  1.565E-04  3.275E-04  0.000E+00  0.000E+00  7.891E-01   1.0E+00
   24   69  1.564E+02  6.514E+08  2.390E-03  4.924E-03  0.000E+00  0.000E+00  2.448E+00   8.5E-01
   24   70  1.540E+02  6.076E+09  3.241E-02  6.573E-02  0.000E+00  0.000E+00  1.310E+00   8.8E-01
   24   71  1.539E+02  3.953E+08  7.022E-04  1.424E-03  0.000E+00  0.000E+00  3.041E-01   6.9E-01
   24   72  1.514E+02  1.071E+09  3.678E-03  7.332E-03  0.000E+00  0.000E+00  4.720E+00   7.6E-01
   24   73  1.504E+02  3.738E+08  1.902E-03  3.768E-03  0.000E+00  0.000E+00  1.106E+01   8.0E-01
   24   74  1.498E+02  1.413E+09  2.377E-03  4.690E-03  0.000E+00  0.000E+00  1.135E+00   9.1E-01
   24   75  1.497E+02  2.021E+09  6.791E-03  1.339E-02  0.000E+00  0.000E+00  1.812E+01   6.6E-01
   24   76  1.482E+02  1.140E+10  1.878E-02  3.666E-02  0.000E+00  0.000E+00  1.659E+01   8.6E-01
   24   77  1.461E+02  1.171E+10  3.749E-02  7.213E-02  0.000E+00  0.000E+00  5.509E-01   8.6E-01
   24   78  1.401E+02  0.000E+00  0.000E+00  0.000E+00  1.522E+03  7.003E-04  0.000E+00   0.0E+00
   24   79  1.397E+02  0.000E+00  0.000E+00  0.000E+00  1.176E+04  5.429E-01  0.000E+00   0.0E+00
   24   80  1.382E+02  1.396E+10  1.999E-02  3.639E-02  0.000E+00  0.000E+00  2.333E+00   6.9E-01
   24   81  1.190E+02  0.000E+00  0.000E+00  0.000E+00  5.697E+02  2.680E-01  0.000E+00   0.0E+00
   24   82  1.184E+02  0.000E+00  0.000E+00  0.000E+00  1.557E+03  2.615E-01  0.000E+00   0.0E+00
   24   84  1.173E+02  0.000E+00  0.000E+00  0.000E+00  3.204E+03  1.977E-02  0.000E+00   0.0E+00
   24   85  1.167E+02  0.000E+00  0.000E+00  0.000E+00  1.142E+03  0.000E+00  0.000E+00   0.0E+00
   24   86  1.155E+02  0.000E+00  0.000E+00  0.000E+00  4.050E+02  1.057E+00  0.000E+00   0.0E+00
   24   87  1.144E+02  0.000E+00  0.000E+00  0.000E+00  8.538E+02  1.126E-01  0.000E+00   0.0E+00
   24   88  1.135E+02  0.000E+00  0.000E+00  0.000E+00  4.349E+04  0.000E+00  0.000E+00   0.0E+00
   24   89  1.126E+02  5.412E+08  1.029E-03  1.526E-03  0.000E+00  0.000E+00  3.331E+00   5.1E-01
   24   90  1.120E+02  0.000E+00  0.000E+00  0.000E+00  1.293E+04  2.445E+00  0.000E+00   0.0E+00
   24   91  1.117E+02  1.941E+07  5.445E-05  8.008E-05  0.000E+00  0.000E+00  1.397E+01   3.8E+00
   24   92  1.117E+02  0.000E+00  0.000E+00  0.000E+00  1.316E+04  3.760E-01  0.000E+00   0.0E+00
   24   93  1.115E+02  0.000E+00  0.000E+00  0.000E+00  2.242E+04  2.043E-02  0.000E+00   0.0E+00
   24   94  1.114E+02  0.000E+00  0.000E+00  0.000E+00  4.257E+03  0.000E+00  0.000E+00   0.0E+00
   24   95  1.109E+02  0.000E+00  0.000E+00  0.000E+00  5.796E+00  2.900E-02  0.000E+00   0.0E+00
   24   96  1.102E+02  3.788E+09  3.447E-03  5.001E-03  0.000E+00  0.000E+00  1.384E+01   5.0E-01
   24   97  1.098E+02  6.549E+08  1.183E-03  1.709E-03  0.000E+00  0.000E+00  1.003E+02   7.1E-01
   24   98  1.097E+02  0.000E+00  0.000E+00  0.000E+00  5.036E+03  2.010E-01  0.000E+00   0.0E+00
   24   99  1.087E+02  0.000E+00  0.000E+00  0.000E+00  5.040E+04  2.676E+00  0.000E+00   0.0E+00
   24  100  1.073E+02  1.804E+09  1.556E-03  2.198E-03  0.000E+00  0.000E+00  1.348E+01   3.8E-01
   24  101  1.066E+02  0.000E+00  0.000E+00  0.000E+00  1.109E+04  2.035E+00  0.000E+00   0.0E+00
   24  102  1.044E+02  0.000E+00  0.000E+00  0.000E+00  8.396E+03  1.032E-01  0.000E+00   0.0E+00
   25   26  1.445E+04  0.000E+00  0.000E+00  0.000E+00  2.490E-05  3.610E+00  0.000E+00   0.0E+00
   25   27  4.137E+03  0.000E+00  0.000E+00  0.000E+00  1.275E-01  7.593E+00  0.000E+00   0.0E+00
   25   28  3.514E+03  0.000E+00  0.000E+00  0.000E+00  1.097E-01  1.646E+01  0.000E+00   0.0E+00
   25   29  1.309E+03  0.000E+00  0.000E+00  0.000E+00  1.147E+00  7.169E-01  0.000E+00   0.0E+00
   25   30  1.247E+03  0.000E+00  0.000E+00  0.000E+00  4.754E+01  0.000E+00  0.000E+00   0.0E+00
   25   31  8.951E+02  0.000E+00  0.000E+00  0.000E+00  2.843E+00  8.553E-01  0.000E+00   0.0E+00
   25   32  7.985E+02  0.000E+00  0.000E+00  0.000E+00  3.098E+01  0.000E+00  0.000E+00   0.0E+00
   25   33  7.925E+02  4.650E+04  5.837E-06  9.137E-05  0.000E+00  0.000E+00  4.857E-05   3.0E+00
   25   34  7.852E+02  7.223E+03  6.676E-07  1.036E-05  0.000E+00  0.000E+00  5.221E-05   1.1E+01
   25   35  7.620E+02  6.668E+04  3.869E-06  5.824E-05  0.000E+00  0.000E+00  1.354E-04   9.1E-01
   25   36  7.331E+02  0.000E+00  0.000E+00  0.000E+00  0.000E+00  0.000E+00  3.659E-04   0.0E+00
   25   37  6.811E+02  0.000E+00  0.000E+00  0.000E+00  0.000E+00  0.000E+00  3.603E-05   0.0E+00
   25   38  6.416E+02  4.392E+05  3.614E-05  4.580E-04  0.000E+00  0.000E+00  1.594E-04   4.0E+00
   25   39  6.119E+02  0.000E+00  0.000E+00  0.000E+00  0.000E+00  0.000E+00  1.599E-04   0.0E+00
   25   40  5.863E+02  4.174E+05  2.151E-05  2.491E-04  0.000E+00  0.000E+00  1.491E-05   1.6E+00
   25   41  5.847E+02  1.754E+06  5.993E-05  6.921E-04  0.000E+00  0.000E+00  1.836E-06   1.0E+00
   25   42  5.641E+02  0.000E+00  0.000E+00  0.000E+00  0.000E+00  0.000E+00  1.146E-03   0.0E+00
   25   43  5.610E+02  1.127E+05  3.545E-06  3.929E-05  0.000E+00  0.000E+00  3.318E-06   6.9E-01
   25   44  5.614E+02  3.536E+05  2.228E-05  2.471E-04  0.000E+00  0.000E+00  7.823E-04   1.9E+00
   25   45  5.523E+02  1.122E+05  5.129E-06  5.595E-05  0.000E+00  0.000E+00  7.039E-05   5.4E-02
   25   46  5.335E+02  1.918E+07  5.456E-04  5.749E-03  0.000E+00  0.000E+00  4.674E-03   9.5E-01
   25   47  5.248E+02  1.611E+06  6.652E-05  6.896E-04  0.000E+00  0.000E+00  1.241E-05   1.3E+00
   25   48  4.913E+02  1.709E+06  4.123E-05  4.001E-04  0.000E+00  0.000E+00  4.708E-05   3.8E-01
   25   49  4.782E+02  3.708E+07  1.271E-03  1.201E-02  0.000E+00  0.000E+00  4.660E-03   1.6E+00
   25   50  4.187E+02  5.453E+09  1.911E-01  1.581E+00  0.000E+00  0.000E+00  6.643E-03   1.3E+00
   25   51  4.179E+02  0.000E+00  0.000E+00  0.000E+00  0.000E+00  0.000E+00  1.704E+00   0.0E+00
   25   52  3.845E+02  0.000E+00  0.000E+00  0.000E+00  0.000E+00  0.000E+00  6.213E-02   0.0E+00
   25   53  3.808E+02  2.087E+09  4.536E-02  3.411E-01  0.000E+00  0.000E+00  2.192E-02   9.4E-01
   25   54  3.755E+02  1.155E+07  3.255E-04  2.414E-03  0.000E+00  0.000E+00  5.097E-01   5.7E-01
   25   55  3.601E+02  1.182E+08  1.531E-03  1.089E-02  0.000E+00  0.000E+00  3.510E-02   6.4E-01
   25   56  3.575E+02  1.014E+09  1.943E-02  1.372E-01  0.000E+00  0.000E+00  9.451E-02   8.1E-01
   25   57  3.429E+02  4.420E+08  5.194E-03  3.518E-02  0.000E+00  0.000E+00  2.776E-01   9.2E-01
   25   58  3.430E+02  0.000E+00  0.000E+00  0.000E+00  0.000E+00  0.000E+00  1.941E-01   0.0E+00
   25   59  2.862E+02  8.466E+05  1.040E-05  5.880E-05  0.000E+00  0.000E+00  9.139E-03   4.5E-03
   25   60  2.807E+02  7.613E+07  5.995E-04  3.324E-03  0.000E+00  0.000E+00  3.619E-03   1.6E-01
   25   61  2.492E+02  0.000E+00  0.000E+00  0.000E+00  1.115E+01  8.279E-01  0.000E+00   0.0E+00
   25   62  2.386E+02  0.000E+00  0.000E+00  0.000E+00  5.519E+01  6.769E-01  0.000E+00   0.0E+00
   25   63  2.302E+02  0.000E+00  0.000E+00  0.000E+00  8.546E+01  0.000E+00  0.000E+00   0.0E+00
   25   64  2.191E+02  0.000E+00  0.000E+00  0.000E+00  5.031E+02  1.371E-01  0.000E+00   0.0E+00
   25   65  2.090E+02  0.000E+00  0.000E+00  0.000E+00  6.090E+03  0.000E+00  0.000E+00   0.0E+00
   25   66  1.777E+02  7.207E+06  2.274E-05  7.982E-05  0.000E+00  0.000E+00  8.743E-02   7.9E-01
   25   67  1.701E+02  1.544E+07  8.930E-05  3.000E-04  0.000E+00  0.000E+00  2.026E-01   7.8E-01
   25   68  1.698E+02  5.216E+08  2.254E-03  7.560E-03  0.000E+00  0.000E+00  8.070E+00   7.1E-01
   25   69  1.670E+02  6.358E+07  1.771E-04  5.842E-04  0.000E+00  0.000E+00  2.145E+01   1.5E-01
   25   70  1.642E+02  2.822E+08  1.140E-03  3.699E-03  0.000E+00  0.000E+00  9.475E-01   7.0E-01
   25   71  1.641E+02  0.000E+00  0.000E+00  0.000E+00  0.000E+00  0.000E+00  4.868E+01   0.0E+00
   25   72  1.612E+02  1.287E+08  3.342E-04  1.064E-03  0.000E+00  0.000E+00  1.461E+01   1.2E+00
   25   73  1.601E+02  1.631E+08  6.267E-04  1.982E-03  0.000E+00  0.000E+00  1.852E-01   7.2E-01
   25   74  1.594E+02  0.000E+00  0.000E+00  0.000E+00  0.000E+00  0.000E+00  1.977E+01   0.0E+00
   25   75  1.593E+02  3.555E+06  9.017E-06  2.837E-05  0.000E+00  0.000E+00  1.461E+00   9.5E-01
   25   76  1.576E+02  0.000E+00  0.000E+00  0.000E+00  0.000E+00  0.000E+00  6.691E+00   0.0E+00
   25   77  1.552E+02  1.982E+06  4.774E-06  1.464E-05  0.000E+00  0.000E+00  6.059E-02   7.0E+00
   25   78  1.485E+02  0.000E+00  0.000E+00  0.000E+00  3.056E+03  1.318E-01  0.000E+00   0.0E+00
   25   79  1.481E+02  0.000E+00  0.000E+00  0.000E+00  3.431E+03  0.000E+00  0.000E+00   0.0E+00
   25   80  1.464E+02  0.000E+00  0.000E+00  0.000E+00  0.000E+00  0.000E+00  2.075E+00   0.0E+00
   25   81  1.250E+02  0.000E+00  0.000E+00  0.000E+00  9.453E+01  0.000E+00  0.000E+00   0.0E+00
   25   82  1.243E+02  0.000E+00  0.000E+00  0.000E+00  4.162E+01  9.981E-02  0.000E+00   0.0E+00
   25   83  1.235E+02  0.000E+00  0.000E+00  0.000E+00  1.871E-01  0.000E+00  0.000E+00   0.0E+00
   25   84  1.231E+02  0.000E+00  0.000E+00  0.000E+00  3.426E+00  4.038E-01  0.000E+00   0.0E+00
   25   85  1.225E+02  0.000E+00  0.000E+00  0.000E+00  3.014E+02  2.356E+00  0.000E+00   0.0E+00
   25   86  1.211E+02  0.000E+00  0.000E+00  0.000E+00  3.731E+02  1.031E+00  0.000E+00   0.0E+00
   25   87  1.199E+02  0.000E+00  0.000E+00  0.000E+00  1.427E+02  7.734E+00  0.000E+00   0.0E+00
   25   88  1.190E+02  0.000E+00  0.000E+00  0.000E+00  5.280E+02  2.763E+00  0.000E+00   0.0E+00
   25   89  1.180E+02  1.214E+11  1.688E-01  3.933E-01  0.000E+00  0.000E+00  1.692E+01   5.3E-01
   25   90  1.173E+02  0.000E+00  0.000E+00  0.000E+00  2.702E+01  0.000E+00  0.000E+00   0.0E+00
   25   91  1.169E+02  2.919E+09  5.985E-03  1.383E-02  0.000E+00  0.000E+00  4.363E+00   5.1E-01
   25   92  1.169E+02  0.000E+00  0.000E+00  0.000E+00  2.284E+01  7.212E-01  0.000E+00   0.0E+00
   25   93  1.167E+02  0.000E+00  0.000E+00  0.000E+00  1.083E+02  1.227E-01  0.000E+00   0.0E+00
   25   94  1.166E+02  0.000E+00  0.000E+00  0.000E+00  3.508E+02  2.851E+00  0.000E+00   0.0E+00
   25   95  1.161E+02  0.000E+00  0.000E+00  0.000E+00  3.114E+02  1.005E+00  0.000E+00   0.0E+00
   25   96  1.153E+02  0.000E+00  0.000E+00  0.000E+00  0.000E+00  0.000E+00  8.910E+00   0.0E+00
   25   97  1.148E+02  1.302E+07  1.715E-05  3.891E-05  0.000E+00  0.000E+00  2.091E-01   4.7E-01
   25   98  1.148E+02  0.000E+00  0.000E+00  0.000E+00  1.457E+02  1.174E-01  0.000E+00   0.0E+00
   25   99  1.137E+02  0.000E+00  0.000E+00  0.000E+00  8.898E+01  8.795E-01  0.000E+00   0.0E+00
   25  100  1.121E+02  0.000E+00  0.000E+00  0.000E+00  0.000E+00  0.000E+00  2.493E-01   0.0E+00
   25  101  1.114E+02  0.000E+00  0.000E+00  0.000E+00  1.026E+02  0.000E+00  0.000E+00   0.0E+00
   25  102  1.090E+02  0.000E+00  0.000E+00  0.000E+00  9.843E+02  1.095E-01  0.000E+00   0.0E+00
   26   27  5.796E+03  0.000E+00  0.000E+00  0.000E+00  9.839E-04  0.000E+00  0.000E+00   0.0E+00
   26   28  4.643E+03  0.000E+00  0.000E+00  0.000E+00  6.967E-02  3.131E+00  0.000E+00   0.0E+00
   26   29  1.439E+03  0.000E+00  0.000E+00  0.000E+00  1.989E+01  0.000E+00  0.000E+00   0.0E+00
   26   31  9.542E+02  0.000E+00  0.000E+00  0.000E+00  8.121E+00  0.000E+00  0.000E+00   0.0E+00
   26   33  8.385E+02  2.849E+05  3.003E-05  6.631E-04  0.000E+00  0.000E+00  5.336E-05   2.6E+00
   26   34  8.303E+02  2.900E+05  2.248E-05  4.916E-04  0.000E+00  0.000E+00  6.197E-05   1.1E+00
   26   35  8.044E+02  0.000E+00  0.000E+00  0.000E+00  0.000E+00  0.000E+00  7.349E-05   0.0E+00
   26   37  7.148E+02  1.496E+05  1.432E-05  2.695E-04  0.000E+00  0.000E+00  2.440E-06   6.7E+00
   26   38  6.714E+02  5.196E+05  3.512E-05  6.209E-04  0.000E+00  0.000E+00  6.806E-04   1.7E+00
   26   40  6.111E+02  1.361E+06  5.713E-05  9.194E-04  0.000E+00  0.000E+00  1.806E-03   1.5E-01
   26   41  6.093E+02  0.000E+00  0.000E+00  0.000E+00  0.000E+00  0.000E+00  9.013E-05   0.0E+00
   26   43  5.837E+02  0.000E+00  0.000E+00  0.000E+00  0.000E+00  0.000E+00  1.087E-05   0.0E+00
   26   44  5.841E+02  1.884E+06  9.634E-05  1.482E-03  0.000E+00  0.000E+00  2.606E-03   7.3E-01
   26   45  5.742E+02  2.871E+06  1.065E-04  1.610E-03  0.000E+00  0.000E+00  3.661E-03   9.2E-01
   26   46  5.540E+02  0.000E+00  0.000E+00  0.000E+00  0.000E+00  0.000E+00  3.506E-04   0.0E+00
   26   47  5.445E+02  5.859E+05  1.954E-05  2.802E-04  0.000E+00  0.000E+00  7.614E-03   5.5E-01
   26   48  5.086E+02  0.000E+00  0.000E+00  0.000E+00  0.000E+00  0.000E+00  2.805E-02   0.0E+00
   26   49  4.945E+02  4.404E+07  1.211E-03  1.577E-02  0.000E+00  0.000E+00  5.895E-02   5.8E-01
   26   50  4.312E+02  2.898E+08  8.079E-03  9.175E-02  0.000E+00  0.000E+00  1.233E-01   1.2E+00
   26   51  4.303E+02  5.388E+09  1.870E-01  2.119E+00  0.000E+00  0.000E+00  2.945E+00   1.3E+00
   26   53  3.911E+02  1.872E+07  3.220E-04  3.316E-03  0.000E+00  0.000E+00  7.488E-01   8.2E-01
   26   54  3.855E+02  2.443E+09  5.442E-02  5.525E-01  0.000E+00  0.000E+00  3.374E+00   9.0E-01
   26   55  3.693E+02  0.000E+00  0.000E+00  0.000E+00  0.000E+00  0.000E+00  1.269E-01   0.0E+00
   26   56  3.666E+02  2.892E+08  4.370E-03  4.219E-02  0.000E+00  0.000E+00  4.308E-01   1.1E+00
   26   57  3.512E+02  0.000E+00  0.000E+00  0.000E+00  0.000E+00  0.000E+00  5.272E-02   0.0E+00
   26   59  2.920E+02  1.067E+08  1.024E-03  7.873E-03  0.000E+00  0.000E+00  1.476E-01   3.0E-01
   26   60  2.862E+02  0.000E+00  0.000E+00  0.000E+00  0.000E+00  0.000E+00  1.167E-02   0.0E+00
   26   61  2.536E+02  0.000E+00  0.000E+00  0.000E+00  4.007E+01  9.782E-01  0.000E+00   0.0E+00
   26   62  2.426E+02  0.000E+00  0.000E+00  0.000E+00  1.157E+02  0.000E+00  0.000E+00   0.0E+00
   26   64  2.225E+02  0.000E+00  0.000E+00  0.000E+00  3.520E+03  0.000E+00  0.000E+00   0.0E+00
   26   66  1.799E+02  0.000E+00  0.000E+00  0.000E+00  0.000E+00  0.000E+00  2.363E-02   0.0E+00
   26   67  1.721E+02  6.079E+08  2.699E-03  1.223E-02  0.000E+00  0.000E+00  6.935E+00   8.0E-01
   26   68  1.718E+02  1.069E+07  3.549E-05  1.606E-04  0.000E+00  0.000E+00  3.436E+00   4.4E-02
   26   69  1.689E+02  0.000E+00  0.000E+00  0.000E+00  0.000E+00  0.000E+00  1.823E+00   0.0E+00
   26   70  1.661E+02  8.807E+07  2.731E-04  1.195E-03  0.000E+00  0.000E+00  3.542E+00   1.1E+00
   26   72  1.630E+02  0.000E+00  0.000E+00  0.000E+00  0.000E+00  0.000E+00  5.227E+00   0.0E+00
   26   73  1.619E+02  5.995E+07  1.767E-04  7.536E-04  0.000E+00  0.000E+00  2.189E+01   1.1E+00
   26   75  1.611E+02  0.000E+00  0.000E+00  0.000E+00  0.000E+00  0.000E+00  9.613E+00   0.0E+00
   26   77  1.569E+02  0.000E+00  0.000E+00  0.000E+00  0.000E+00  0.000E+00  5.170E+01   0.0E+00
   26   78  1.500E+02  0.000E+00  0.000E+00  0.000E+00  6.817E+03  0.000E+00  0.000E+00   0.0E+00
   26   82  1.254E+02  0.000E+00  0.000E+00  0.000E+00  1.623E+02  0.000E+00  0.000E+00   0.0E+00
   26   83  1.246E+02  0.000E+00  0.000E+00  0.000E+00  8.993E+02  4.572E+00  0.000E+00   0.0E+00
   26   84  1.241E+02  0.000E+00  0.000E+00  0.000E+00  3.402E+02  1.079E-01  0.000E+00   0.0E+00
   26   85  1.235E+02  0.000E+00  0.000E+00  0.000E+00  5.635E+02  9.372E-01  0.000E+00   0.0E+00
   26   86  1.221E+02  0.000E+00  0.000E+00  0.000E+00  7.103E+01  8.430E-01  0.000E+00   0.0E+00
   26   87  1.209E+02  0.000E+00  0.000E+00  0.000E+00  7.247E+00  0.000E+00  0.000E+00   0.0E+00
   26   88  1.199E+02  0.000E+00  0.000E+00  0.000E+00  3.099E+02  9.865E-01  0.000E+00   0.0E+00
   26   89  1.189E+02  0.000E+00  0.000E+00  0.000E+00  0.000E+00  0.000E+00  1.272E+01   0.0E+00
   26   91  1.179E+02  1.137E+11  1.778E-01  5.520E-01  0.000E+00  0.000E+00  2.032E+00   5.3E-01
   26   92  1.179E+02  0.000E+00  0.000E+00  0.000E+00  9.818E+01  6.887E-01  0.000E+00   0.0E+00
   26   93  1.177E+02  0.000E+00  0.000E+00  0.000E+00  6.990E+00  0.000E+00  0.000E+00   0.0E+00
   26   94  1.176E+02  0.000E+00  0.000E+00  0.000E+00  4.157E+00  6.751E-01  0.000E+00   0.0E+00
   26   95  1.171E+02  0.000E+00  0.000E+00  0.000E+00  1.113E+01  8.789E+00  0.000E+00   0.0E+00
   26   97  1.158E+02  0.000E+00  0.000E+00  0.000E+00  0.000E+00  0.000E+00  1.111E+01   0.0E+00
   26   98  1.157E+02  0.000E+00  0.000E+00  0.000E+00  7.802E+01  0.000E+00  0.000E+00   0.0E+00
   26   99  1.146E+02  0.000E+00  0.000E+00  0.000E+00  1.268E+01  2.806E+00  0.000E+00   0.0E+00
   26  102  1.099E+02  0.000E+00  0.000E+00  0.000E+00  7.429E+02  0.000E+00  0.000E+00   0.0E+00
   27   28  2.335E+04  0.000E+00  0.000E+00  0.000E+00  5.058E-06  7.826E-01  0.000E+00   0.0E+00
   27   29  1.914E+03  0.000E+00  0.000E+00  0.000E+00  1.480E-02  6.019E+01  0.000E+00   0.0E+00
   27   30  1.786E+03  0.000E+00  0.000E+00  0.000E+00  1.386E-01  2.305E+01  0.000E+00   0.0E+00
   27   31  1.142E+03  0.000E+00  0.000E+00  0.000E+00  4.234E-01  2.044E+00  0.000E+00   0.0E+00
   27   32  9.894E+02  0.000E+00  0.000E+00  0.000E+00  9.099E+00  1.032E+02  0.000E+00   0.0E+00
   27   33  9.803E+02  0.000E+00  0.000E+00  0.000E+00  0.000E+00  0.000E+00  7.828E-05   0.0E+00
   27   34  9.692E+02  8.298E+02  1.753E-07  2.237E-06  0.000E+00  0.000E+00  2.021E-05   3.8E+01
   27   35  9.340E+02  5.672E+05  7.419E-05  9.125E-04  0.000E+00  0.000E+00  5.110E-05   2.5E+00
   27   36  8.910E+02  9.804E+05  5.835E-05  6.846E-04  0.000E+00  0.000E+00  1.740E-04   1.9E+00
   27   38  7.594E+02  0.000E+00  0.000E+00  0.000E+00  0.000E+00  0.000E+00  1.091E-03   0.0E+00
   27   39  7.181E+02  7.931E+05  3.066E-05  2.899E-04  0.000E+00  0.000E+00  2.031E-03   9.9E-01
   27   40  6.831E+02  1.086E+04  1.139E-06  1.025E-05  0.000E+00  0.000E+00  4.574E-05   1.3E+00
   27   41  6.810E+02  1.160E+07  8.062E-04  7.229E-03  0.000E+00  0.000E+00  2.626E-05   1.9E+00
   27   42  6.531E+02  5.489E+07  1.755E-03  1.510E-02  0.000E+00  0.000E+00  1.463E-02   1.4E+00
   27   43  6.491E+02  1.620E+05  1.023E-05  8.745E-05  0.000E+00  0.000E+00  1.089E-04   1.9E+00
   27   44  6.496E+02  0.000E+00  0.000E+00  0.000E+00  0.000E+00  0.000E+00  4.713E-03   0.0E+00
   27   45  6.374E+02  7.591E+04  6.935E-06  5.821E-05  0.000E+00  0.000E+00  3.716E-04   1.2E+00
   27   46  6.125E+02  1.090E+08  6.128E-03  4.943E-02  0.000E+00  0.000E+00  3.759E-04   1.7E+00
   27   47  6.010E+02  1.472E+04  1.195E-06  9.460E-06  0.000E+00  0.000E+00  3.438E-03   7.2E-03
   27   48  5.575E+02  1.999E+08  9.315E-03  6.838E-02  0.000E+00  0.000E+00  1.742E-02   1.4E+00
   27   49  5.407E+02  1.009E+06  6.630E-05  4.720E-04  0.000E+00  0.000E+00  3.248E-03   1.2E+00
   27   50  4.659E+02  0.000E+00  0.000E+00  0.000E+00  0.000E+00  0.000E+00  1.519E-01   0.0E+00
   27   52  4.239E+02  3.204E+07  4.316E-04  2.410E-03  0.000E+00  0.000E+00  5.499E-01   6.7E-01
   27   53  4.194E+02  4.205E+09  1.663E-01  9.183E-01  0.000E+00  0.000E+00  3.097E-01   1.2E+00
   27   54  4.130E+02  0.000E+00  0.000E+00  0.000E+00  0.000E+00  0.000E+00  2.137E+00   0.0E+00
   27   55  3.945E+02  2.123E+08  4.952E-03  2.572E-02  0.000E+00  0.000E+00  1.281E-01   6.6E-01
   27   56  3.913E+02  4.677E+06  1.610E-04  8.298E-04  0.000E+00  0.000E+00  1.367E-01   6.1E+00
   27   57  3.739E+02  3.448E+09  7.226E-02  3.558E-01  0.000E+00  0.000E+00  2.677E-02   7.9E-01
   27   58  3.741E+02  9.083E+08  9.526E-03  4.692E-02  0.000E+00  0.000E+00  1.121E+00   7.5E-01
   27   59  3.075E+02  1.182E+07  2.514E-04  1.018E-03  0.000E+00  0.000E+00  7.190E-02   8.7E-01
   27   60  3.011E+02  9.574E+05  1.302E-05  5.161E-05  0.000E+00  0.000E+00  3.984E-05   8.3E-01
   27   61  2.652E+02  0.000E+00  0.000E+00  0.000E+00  2.665E+00  1.459E+00  0.000E+00   0.0E+00
   27   62  2.532E+02  0.000E+00  0.000E+00  0.000E+00  2.100E+01  1.707E+01  0.000E+00   0.0E+00
   27   63  2.437E+02  0.000E+00  0.000E+00  0.000E+00  6.779E+00  1.402E+01  0.000E+00   0.0E+00
   27   64  2.313E+02  0.000E+00  0.000E+00  0.000E+00  1.608E+02  9.487E-01  0.000E+00   0.0E+00
   27   65  2.201E+02  0.000E+00  0.000E+00  0.000E+00  7.438E+02  2.036E-01  0.000E+00   0.0E+00
   27   66  1.857E+02  3.543E+06  1.831E-05  4.476E-05  0.000E+00  0.000E+00  1.540E-04   1.0E+00
   27   67  1.774E+02  0.000E+00  0.000E+00  0.000E+00  0.000E+00  0.000E+00  8.866E-01   0.0E+00
   27   68  1.771E+02  2.082E+07  1.468E-04  3.422E-04  0.000E+00  0.000E+00  1.283E+00   7.7E-01
   27   69  1.740E+02  5.176E+07  2.349E-04  5.381E-04  0.000E+00  0.000E+00  4.524E-02   4.0E-01
   27   70  1.710E+02  7.363E+06  4.841E-05  1.090E-04  0.000E+00  0.000E+00  6.549E+00   1.0E+00
   27   71  1.709E+02  4.108E+07  8.992E-05  2.023E-04  0.000E+00  0.000E+00  1.452E+00   2.0E-01
   27   72  1.677E+02  5.536E+04  2.334E-07  5.156E-07  0.000E+00  0.000E+00  1.055E+01   3.6E+01
   27   73  1.666E+02  1.814E+07  1.132E-04  2.483E-04  0.000E+00  0.000E+00  2.318E+00   6.0E-01
   27   74  1.658E+02  1.227E+08  2.529E-04  5.522E-04  0.000E+00  0.000E+00  3.577E+01   7.8E-01
   27   75  1.657E+02  7.885E+06  3.245E-05  7.080E-05  0.000E+00  0.000E+00  1.746E+01   1.3E+00
   27   76  1.639E+02  1.207E+08  2.430E-04  5.245E-04  0.000E+00  0.000E+00  3.891E-01   5.5E-01
   27   77  1.613E+02  8.686E+05  3.388E-06  7.195E-06  0.000E+00  0.000E+00  1.970E+00   1.8E+01
   27   78  1.540E+02  0.000E+00  0.000E+00  0.000E+00  2.830E+02  8.768E+00  0.000E+00   0.0E+00
   27   79  1.536E+02  0.000E+00  0.000E+00  0.000E+00  2.621E+02  1.303E+00  0.000E+00   0.0E+00
   27   80  1.518E+02  1.485E+08  2.563E-04  5.121E-04  0.000E+00  0.000E+00  2.913E+00   8.5E-01
   27   81  1.289E+02  0.000E+00  0.000E+00  0.000E+00  1.097E+01  3.535E-01  0.000E+00   0.0E+00
   27   82  1.281E+02  0.000E+00  0.000E+00  0.000E+00  3.730E+01  6.606E-01  0.000E+00   0.0E+00
   27   84  1.269E+02  0.000E+00  0.000E+00  0.000E+00  1.635E+02  7.096E-02  0.000E+00   0.0E+00
   27   85  1.262E+02  0.000E+00  0.000E+00  0.000E+00  8.901E+01  0.000E+00  0.000E+00   0.0E+00
   27   86  1.248E+02  0.000E+00  0.000E+00  0.000E+00  3.257E+02  1.592E+00  0.000E+00   0.0E+00
   27   87  1.235E+02  0.000E+00  0.000E+00  0.000E+00  4.325E+01  9.948E-02  0.000E+00   0.0E+00
   27   88  1.225E+02  0.000E+00  0.000E+00  0.000E+00  1.957E+03  0.000E+00  0.000E+00   0.0E+00
   27   89  1.214E+02  7.229E+09  1.598E-02  2.555E-02  0.000E+00  0.000E+00  2.915E-03   6.0E-01
   27   90  1.207E+02  0.000E+00  0.000E+00  0.000E+00  1.063E+02  4.026E+00  0.000E+00   0.0E+00
   27   91  1.203E+02  1.493E+09  4.863E-03  7.707E-03  0.000E+00  0.000E+00  3.422E-01   6.6E-01
   27   92  1.203E+02  0.000E+00  0.000E+00  0.000E+00  1.400E+02  1.583E-01  0.000E+00   0.0E+00
   27   93  1.201E+02  0.000E+00  0.000E+00  0.000E+00  4.464E+00  1.463E+00  0.000E+00   0.0E+00
   27   94  1.200E+02  0.000E+00  0.000E+00  0.000E+00  5.030E+02  0.000E+00  0.000E+00   0.0E+00
   27   95  1.195E+02  0.000E+00  0.000E+00  0.000E+00  9.514E+02  1.428E+00  0.000E+00   0.0E+00
   27   96  1.186E+02  8.196E+10  8.642E-02  1.350E-01  0.000E+00  0.000E+00  1.592E+00   5.5E-01
   27   97  1.181E+02  1.819E+10  3.803E-02  5.915E-02  0.000E+00  0.000E+00  3.470E-01   5.4E-01
   27   98  1.180E+02  0.000E+00  0.000E+00  0.000E+00  1.893E+02  1.272E-01  0.000E+00   0.0E+00
   27   99  1.169E+02  0.000E+00  0.000E+00  0.000E+00  6.547E+03  5.445E-01  0.000E+00   0.0E+00
   27  100  1.152E+02  1.254E+09  1.248E-03  1.894E-03  0.000E+00  0.000E+00  1.305E+00   5.9E-01
   27  101  1.145E+02  0.000E+00  0.000E+00  0.000E+00  2.526E+03  2.385E-01  0.000E+00   0.0E+00
   27  102  1.120E+02  0.000E+00  0.000E+00  0.000E+00  1.513E+03  4.006E-01  0.000E+00   0.0E+00
   28   29  2.086E+03  0.000E+00  0.000E+00  0.000E+00  4.047E-01  2.808E+01  0.000E+00   0.0E+00
   28   30  1.933E+03  0.000E+00  0.000E+00  0.000E+00  5.051E-01  0.000E+00  0.000E+00   0.0E+00
   28   31  1.201E+03  0.000E+00  0.000E+00  0.000E+00  2.372E+00  1.190E-02  0.000E+00   0.0E+00
   28   32  1.033E+03  0.000E+00  0.000E+00  0.000E+00  8.229E+00  0.000E+00  0.000E+00   0.0E+00
   28   33  1.023E+03  7.245E+03  1.516E-06  3.065E-05  0.000E+00  0.000E+00  3.484E-05   7.5E+00
   28   34  1.011E+03  3.825E+05  5.862E-05  1.171E-03  0.000E+00  0.000E+00  3.927E-06   2.3E+00
   28   35  9.730E+02  4.293E+05  4.061E-05  7.806E-04  0.000E+00  0.000E+00  8.600E-06   2.1E+00
   28   36  9.264E+02  0.000E+00  0.000E+00  0.000E+00  0.000E+00  0.000E+00  1.778E-05   0.0E+00
   28   37  8.448E+02  0.000E+00  0.000E+00  0.000E+00  0.000E+00  0.000E+00  2.945E-05   0.0E+00
   28   38  7.849E+02  1.623E+04  1.999E-06  3.099E-05  0.000E+00  0.000E+00  2.643E-04   7.2E-02
   28   39  7.409E+02  0.000E+00  0.000E+00  0.000E+00  0.000E+00  0.000E+00  4.616E-04   0.0E+00
   28   40  7.037E+02  3.334E+06  2.475E-04  3.440E-03  0.000E+00  0.000E+00  7.230E-04   3.0E+00
   28   41  7.014E+02  1.427E+06  7.017E-05  9.722E-04  0.000E+00  0.000E+00  3.412E-04   2.2E+00
   28   42  6.719E+02  0.000E+00  0.000E+00  0.000E+00  0.000E+00  0.000E+00  5.377E-03   0.0E+00
   28   43  6.676E+02  3.184E+05  1.418E-05  1.871E-04  0.000E+00  0.000E+00  4.089E-04   1.9E+00
   28   44  6.682E+02  6.776E+03  6.047E-07  7.981E-06  0.000E+00  0.000E+00  1.031E-05   3.9E+00
   28   45  6.553E+02  1.210E+07  7.787E-04  1.008E-02  0.000E+00  0.000E+00  2.115E-03   2.3E+00
   28   46  6.290E+02  5.632E+07  2.227E-03  2.767E-02  0.000E+00  0.000E+00  2.568E-05   1.6E+00
   28   47  6.169E+02  2.890E+07  1.648E-03  2.009E-02  0.000E+00  0.000E+00  1.484E-02   1.9E+00
   28   48  5.711E+02  8.133E+07  2.651E-03  2.991E-02  0.000E+00  0.000E+00  1.543E-01   1.1E+00
   28   49  5.535E+02  2.846E+08  1.307E-02  1.429E-01  0.000E+00  0.000E+00  7.581E-02   1.5E+00
   28   50  4.754E+02  4.918E+07  2.221E-03  2.086E-02  0.000E+00  0.000E+00  1.296E-02   1.4E+00
   28   51  4.742E+02  0.000E+00  0.000E+00  0.000E+00  0.000E+00  0.000E+00  4.486E-01   0.0E+00
   28   52  4.318E+02  0.000E+00  0.000E+00  0.000E+00  0.000E+00  0.000E+00  3.609E-01   0.0E+00
   28   53  4.270E+02  1.983E+08  5.420E-03  4.572E-02  0.000E+00  0.000E+00  1.258E+00   7.0E-01
   28   54  4.204E+02  4.197E+09  1.483E-01  1.231E+00  0.000E+00  0.000E+00  7.958E-01   1.2E+00
   28   55  4.012E+02  9.571E+08  1.540E-02  1.221E-01  0.000E+00  0.000E+00  1.262E+00   8.2E-01
   28   56  3.980E+02  2.918E+09  6.929E-02  5.447E-01  0.000E+00  0.000E+00  1.233E+00   8.6E-01
   28   57  3.800E+02  1.771E+08  2.555E-03  1.918E-02  0.000E+00  0.000E+00  1.252E+00   7.7E-01
   28   58  3.801E+02  0.000E+00  0.000E+00  0.000E+00  0.000E+00  0.000E+00  5.849E-01   0.0E+00
   28   59  3.116E+02  1.951E+08  2.841E-03  1.749E-02  0.000E+00  0.000E+00  2.107E-01   8.1E-01
   28   60  3.051E+02  1.019E+07  9.481E-05  5.713E-04  0.000E+00  0.000E+00  8.629E-02   1.3E+00
   28   61  2.682E+02  0.000E+00  0.000E+00  0.000E+00  9.181E+00  3.568E+01  0.000E+00   0.0E+00
   28   62  2.560E+02  0.000E+00  0.000E+00  0.000E+00  1.129E+01  1.251E+01  0.000E+00   0.0E+00
   28   63  2.463E+02  0.000E+00  0.000E+00  0.000E+00  2.587E+01  0.000E+00  0.000E+00   0.0E+00
   28   64  2.336E+02  0.000E+00  0.000E+00  0.000E+00  4.798E+02  3.504E+00  0.000E+00   0.0E+00
   28   65  2.222E+02  0.000E+00  0.000E+00  0.000E+00  1.120E+03  0.000E+00  0.000E+00   0.0E+00
   28   66  1.871E+02  6.712E+07  2.349E-04  8.685E-04  0.000E+00  0.000E+00  2.478E-01   9.4E-01
   28   67  1.787E+02  6.835E+06  4.364E-05  1.540E-04  0.000E+00  0.000E+00  2.425E+00   9.8E-01
   28   68  1.784E+02  3.346E+07  1.597E-04  5.626E-04  0.000E+00  0.000E+00  1.635E-01   4.2E-01
   28   69  1.753E+02  2.044E+07  6.276E-05  2.173E-04  0.000E+00  0.000E+00  7.925E-03   1.1E+00
   28   70  1.722E+02  2.137E+08  9.506E-04  3.234E-03  0.000E+00  0.000E+00  4.461E-01   1.1E+00
   28   71  1.721E+02  0.000E+00  0.000E+00  0.000E+00  0.000E+00  0.000E+00  4.645E-02   0.0E+00
   28   72  1.689E+02  5.570E+07  1.589E-04  5.301E-04  0.000E+00  0.000E+00  1.088E+00   5.7E-01
   28   73  1.678E+02  1.079E+06  4.554E-06  1.509E-05  0.000E+00  0.000E+00  2.010E+01   2.7E+01
   28   74  1.670E+02  0.000E+00  0.000E+00  0.000E+00  0.000E+00  0.000E+00  6.934E-01   0.0E+00
   28   75  1.669E+02  7.676E+07  2.136E-04  7.041E-04  0.000E+00  0.000E+00  5.703E+00   1.6E-01
   28   76  1.650E+02  0.000E+00  0.000E+00  0.000E+00  0.000E+00  0.000E+00  3.054E+01   0.0E+00
   28   77  1.624E+02  2.493E+07  6.574E-05  2.109E-04  0.000E+00  0.000E+00  3.221E+01   1.9E+00
   28   78  1.551E+02  0.000E+00  0.000E+00  0.000E+00  6.570E+01  1.694E+01  0.000E+00   0.0E+00
   28   79  1.546E+02  0.000E+00  0.000E+00  0.000E+00  2.820E+02  0.000E+00  0.000E+00   0.0E+00
   28   80  1.528E+02  0.000E+00  0.000E+00  0.000E+00  0.000E+00  0.000E+00  1.159E+01   0.0E+00
   28   81  1.296E+02  0.000E+00  0.000E+00  0.000E+00  3.850E+02  0.000E+00  0.000E+00   0.0E+00
   28   82  1.289E+02  0.000E+00  0.000E+00  0.000E+00  4.488E+02  4.094E-01  0.000E+00   0.0E+00
   28   83  1.280E+02  0.000E+00  0.000E+00  0.000E+00  1.222E+03  0.000E+00  0.000E+00   0.0E+00
   28   84  1.276E+02  0.000E+00  0.000E+00  0.000E+00  6.947E+02  1.906E+00  0.000E+00   0.0E+00
   28   85  1.269E+02  0.000E+00  0.000E+00  0.000E+00  4.829E+02  8.470E-01  0.000E+00   0.0E+00
   28   86  1.254E+02  0.000E+00  0.000E+00  0.000E+00  2.634E-01  3.295E-01  0.000E+00   0.0E+00
   28   87  1.242E+02  0.000E+00  0.000E+00  0.000E+00  2.554E+00  8.999E-02  0.000E+00   0.0E+00
   28   88  1.231E+02  0.000E+00  0.000E+00  0.000E+00  2.111E+03  2.746E+00  0.000E+00   0.0E+00
   28   89  1.221E+02  4.507E+08  6.712E-04  1.618E-03  0.000E+00  0.000E+00  1.752E+00   6.9E-01
   28   90  1.213E+02  0.000E+00  0.000E+00  0.000E+00  3.533E+01  0.000E+00  0.000E+00   0.0E+00
   28   91  1.210E+02  1.444E+10  3.168E-02  7.570E-02  0.000E+00  0.000E+00  7.770E+00   5.9E-01
   28   92  1.210E+02  0.000E+00  0.000E+00  0.000E+00  2.598E+02  1.946E-02  0.000E+00   0.0E+00
   28   93  1.207E+02  0.000E+00  0.000E+00  0.000E+00  6.148E+01  6.285E-01  0.000E+00   0.0E+00
   28   94  1.206E+02  0.000E+00  0.000E+00  0.000E+00  5.060E+02  3.835E-02  0.000E+00   0.0E+00
   28   95  1.201E+02  0.000E+00  0.000E+00  0.000E+00  2.315E+03  2.767E-01  0.000E+00   0.0E+00
   28   96  1.192E+02  0.000E+00  0.000E+00  0.000E+00  0.000E+00  0.000E+00  4.615E+00   0.0E+00
   28   97  1.187E+02  7.886E+10  1.111E-01  2.604E-01  0.000E+00  0.000E+00  3.240E+00   5.4E-01
   28   98  1.186E+02  0.000E+00  0.000E+00  0.000E+00  7.129E+02  3.724E+00  0.000E+00   0.0E+00
   28   99  1.175E+02  0.000E+00  0.000E+00  0.000E+00  4.290E+02  3.943E-01  0.000E+00   0.0E+00
   28  100  1.158E+02  0.000E+00  0.000E+00  0.000E+00  0.000E+00  0.000E+00  6.297E+00   0.0E+00
   28  101  1.151E+02  0.000E+00  0.000E+00  0.000E+00  2.647E+02  0.000E+00  0.000E+00   0.0E+00
   28  102  1.125E+02  0.000E+00  0.000E+00  0.000E+00  1.103E+03  6.082E-02  0.000E+00   0.0E+00
   29   30  2.649E+04  0.000E+00  0.000E+00  0.000E+00  2.003E-07  6.417E-01  0.000E+00   0.0E+00
   29   31  2.832E+03  0.000E+00  0.000E+00  0.000E+00  3.796E-02  2.004E-02  0.000E+00   0.0E+00
   29   32  2.048E+03  0.000E+00  0.000E+00  0.000E+00  9.890E-01  6.383E+02  0.000E+00   0.0E+00
   29   33  2.009E+03  0.000E+00  0.000E+00  0.000E+00  0.000E+00  0.000E+00  2.056E-04   0.0E+00
   29   34  1.963E+03  1.476E+04  1.279E-05  3.305E-04  0.000E+00  0.000E+00  2.605E-06   1.1E+01
   29   35  1.824E+03  1.519E+03  7.577E-07  1.820E-05  0.000E+00  0.000E+00  6.634E-06   4.1E+00
   29   36  1.667E+03  7.039E+03  1.466E-06  3.217E-05  0.000E+00  0.000E+00  1.035E-04   3.8E+00
   29   38  1.259E+03  0.000E+00  0.000E+00  0.000E+00  0.000E+00  0.000E+00  5.038E-04   0.0E+00
   29   39  1.149E+03  5.802E+05  5.743E-05  8.690E-04  0.000E+00  0.000E+00  1.282E-03   4.2E-01
   29   40  1.062E+03  1.942E+06  4.927E-04  6.890E-03  0.000E+00  0.000E+00  2.152E-04   3.8E-02
   29   41  1.057E+03  1.150E+06  1.926E-04  2.680E-03  0.000E+00  0.000E+00  5.645E-04   1.2E-01
   29   42  9.913E+02  4.273E+04  3.148E-06  4.109E-05  0.000E+00  0.000E+00  1.150E-02   2.6E+01
   29   43  9.820E+02  8.412E+04  1.216E-05  1.573E-04  0.000E+00  0.000E+00  3.461E-06   7.7E-02
   29   44  9.831E+02  0.000E+00  0.000E+00  0.000E+00  0.000E+00  0.000E+00  4.127E-06   0.0E+00
   29   45  9.555E+02  2.982E+06  6.121E-04  7.702E-03  0.000E+00  0.000E+00  4.372E-03   4.9E-01
   29   46  9.007E+02  4.731E+06  5.754E-04  6.824E-03  0.000E+00  0.000E+00  2.551E-03   4.0E-02
   29   47  8.760E+02  5.069E+06  8.749E-04  1.009E-02  0.000E+00  0.000E+00  1.126E-04   5.8E-01
   29   48  7.865E+02  7.068E+05  6.555E-05  6.790E-04  0.000E+00  0.000E+00  9.208E-03   6.7E+00
   29   49  7.534E+02  7.827E+07  9.991E-03  9.912E-02  0.000E+00  0.000E+00  9.588E-04   6.5E-01
   29   50  6.157E+02  0.000E+00  0.000E+00  0.000E+00  0.000E+00  0.000E+00  3.852E-03   0.0E+00
   29   52  5.445E+02  1.186E+09  2.636E-02  1.890E-01  0.000E+00  0.000E+00  2.143E-01   6.8E-01
   29   53  5.370E+02  1.011E+07  6.557E-04  4.637E-03  0.000E+00  0.000E+00  3.516E-02   4.1E-02
   29   54  5.265E+02  0.000E+00  0.000E+00  0.000E+00  0.000E+00  0.000E+00  1.280E-02   0.0E+00
   29   55  4.968E+02  1.575E+09  5.829E-02  3.813E-01  0.000E+00  0.000E+00  1.790E-01   6.2E-01
   29   56  4.918E+02  1.349E+09  7.340E-02  4.754E-01  0.000E+00  0.000E+00  4.972E-03   6.8E-01
   29   57  4.646E+02  3.679E+08  1.191E-02  7.284E-02  0.000E+00  0.000E+00  1.406E-01   7.7E-01
   29   58  4.649E+02  5.352E+08  8.671E-03  5.308E-02  0.000E+00  0.000E+00  2.817E-01   6.8E-01
   29   59  3.664E+02  1.571E+08  4.743E-03  2.288E-02  0.000E+00  0.000E+00  1.805E-01   2.1E+00
   29   60  3.573E+02  6.441E+07  1.233E-03  5.801E-03  0.000E+00  0.000E+00  1.550E-07   1.4E+00
   29   61  3.079E+02  0.000E+00  0.000E+00  0.000E+00  1.510E-01  7.303E+00  0.000E+00   0.0E+00
   29   62  2.919E+02  0.000E+00  0.000E+00  0.000E+00  1.835E-01  1.646E+00  0.000E+00   0.0E+00
   29   63  2.793E+02  0.000E+00  0.000E+00  0.000E+00  1.094E+00  3.721E+00  0.000E+00   0.0E+00
   29   64  2.631E+02  0.000E+00  0.000E+00  0.000E+00  2.574E+01  9.175E-01  0.000E+00   0.0E+00
   29   65  2.487E+02  0.000E+00  0.000E+00  0.000E+00  1.900E+02  1.276E+01  0.000E+00   0.0E+00
   29   66  2.056E+02  7.720E+06  4.892E-05  1.325E-04  0.000E+00  0.000E+00  1.788E+00   6.3E-01
   29   67  1.955E+02  0.000E+00  0.000E+00  0.000E+00  0.000E+00  0.000E+00  4.807E+00   0.0E+00
   29   68  1.951E+02  9.117E+08  7.803E-03  2.005E-02  0.000E+00  0.000E+00  2.170E-01   1.1E+00
   29   69  1.914E+02  8.502E+08  4.668E-03  1.177E-02  0.000E+00  0.000E+00  5.824E-01   1.0E+00
   29   70  1.878E+02  2.599E+09  2.060E-02  5.093E-02  0.000E+00  0.000E+00  8.997E+00   1.1E+00
   29   71  1.876E+02  1.239E+08  3.270E-04  8.080E-04  0.000E+00  0.000E+00  1.974E-01   1.2E+00
   29   72  1.838E+02  4.233E+09  2.144E-02  5.191E-02  0.000E+00  0.000E+00  3.873E-03   9.6E-01
   29   73  1.824E+02  2.859E+09  2.140E-02  5.142E-02  0.000E+00  0.000E+00  3.427E+00   1.1E+00
   29   74  1.815E+02  1.788E+08  4.415E-04  1.055E-03  0.000E+00  0.000E+00  5.543E+00   1.2E+00
   29   75  1.814E+02  7.146E+08  3.524E-03  8.418E-03  0.000E+00  0.000E+00  1.918E+00   1.0E+00
   29   76  1.792E+02  2.677E+09  6.447E-03  1.522E-02  0.000E+00  0.000E+00  4.052E+00   8.2E-01
   29   77  1.761E+02  5.584E+07  2.597E-04  6.023E-04  0.000E+00  0.000E+00  8.739E-02   6.1E-01
   29   78  1.675E+02  0.000E+00  0.000E+00  0.000E+00  6.943E+02  1.151E+00  0.000E+00   0.0E+00
   29   79  1.669E+02  0.000E+00  0.000E+00  0.000E+00  2.090E+03  5.846E+01  0.000E+00   0.0E+00
   29   80  1.648E+02  4.960E+07  1.010E-04  2.192E-04  0.000E+00  0.000E+00  3.492E+01   3.5E+00
   29   81  1.381E+02  0.000E+00  0.000E+00  0.000E+00  3.472E+01  7.986E-02  0.000E+00   0.0E+00
   29   82  1.373E+02  0.000E+00  0.000E+00  0.000E+00  1.685E+02  2.637E-01  0.000E+00   0.0E+00
   29   84  1.359E+02  0.000E+00  0.000E+00  0.000E+00  4.096E+02  3.703E-02  0.000E+00   0.0E+00
   29   85  1.351E+02  0.000E+00  0.000E+00  0.000E+00  1.037E-02  0.000E+00  0.000E+00   0.0E+00
   29   86  1.335E+02  0.000E+00  0.000E+00  0.000E+00  1.013E+03  5.331E-03  0.000E+00   0.0E+00
   29   87  1.320E+02  0.000E+00  0.000E+00  0.000E+00  1.254E+03  1.004E-02  0.000E+00   0.0E+00
   29   88  1.309E+02  0.000E+00  0.000E+00  0.000E+00  4.404E+02  0.000E+00  0.000E+00   0.0E+00
   29   89  1.297E+02  1.668E+09  4.203E-03  7.176E-03  0.000E+00  0.000E+00  2.795E+00   6.5E-01
   29   90  1.288E+02  0.000E+00  0.000E+00  0.000E+00  7.646E+02  9.195E-04  0.000E+00   0.0E+00
   29   91  1.284E+02  9.958E+08  3.693E-03  6.245E-03  0.000E+00  0.000E+00  6.029E+00   6.0E-01
   29   92  1.284E+02  0.000E+00  0.000E+00  0.000E+00  3.734E-02  7.095E-03  0.000E+00   0.0E+00
   29   93  1.281E+02  0.000E+00  0.000E+00  0.000E+00  2.068E+02  1.540E-02  0.000E+00   0.0E+00
   29   94  1.281E+02  0.000E+00  0.000E+00  0.000E+00  6.097E+01  0.000E+00  0.000E+00   0.0E+00
   29   95  1.274E+02  0.000E+00  0.000E+00  0.000E+00  1.218E+04  8.458E-03  0.000E+00   0.0E+00
   29   96  1.264E+02  1.060E+10  1.270E-02  2.115E-02  0.000E+00  0.000E+00  2.378E+01   6.8E-01
   29   97  1.259E+02  9.399E+09  2.232E-02  3.700E-02  0.000E+00  0.000E+00  1.013E+01   7.4E-01
   29   98  1.258E+02  0.000E+00  0.000E+00  0.000E+00  2.564E+04  3.738E-01  0.000E+00   0.0E+00
   29   99  1.245E+02  0.000E+00  0.000E+00  0.000E+00  1.046E+04  3.392E-02  0.000E+00   0.0E+00
   29  100  1.226E+02  5.036E+10  5.676E-02  9.164E-02  0.000E+00  0.000E+00  1.483E+02   5.9E-01
   29  101  1.218E+02  0.000E+00  0.000E+00  0.000E+00  5.021E+04  6.571E+00  0.000E+00   0.0E+00
   29  102  1.189E+02  0.000E+00  0.000E+00  0.000E+00  1.510E+04  9.362E-03  0.000E+00   0.0E+00
   30   31  3.171E+03  0.000E+00  0.000E+00  0.000E+00  1.884E-01  8.510E+01  0.000E+00   0.0E+00
   30   32  2.219E+03  0.000E+00  0.000E+00  0.000E+00  0.000E+00  1.030E-02  0.000E+00   0.0E+00
   30   34  2.120E+03  0.000E+00  0.000E+00  0.000E+00  0.000E+00  0.000E+00  1.546E-05   0.0E+00
   30   35  1.959E+03  3.149E+04  3.623E-05  4.672E-04  0.000E+00  0.000E+00  7.467E-06   4.2E+00
   30   36  1.779E+03  4.146E+03  1.966E-06  2.303E-05  0.000E+00  0.000E+00  0.000E+00   1.3E+01
   30   39  1.201E+03  1.466E+05  3.170E-05  2.507E-04  0.000E+00  0.000E+00  0.000E+00   2.4E+00
   30   40  1.106E+03  0.000E+00  0.000E+00  0.000E+00  0.000E+00  0.000E+00  2.186E-04   0.0E+00
   30   41  1.101E+03  1.048E+06  3.808E-04  2.760E-03  0.000E+00  0.000E+00  1.766E-04   2.3E+00
   30   42  1.030E+03  9.978E+05  1.586E-04  1.076E-03  0.000E+00  0.000E+00  0.000E+00   3.3E+00
   30   43  1.020E+03  9.163E+04  2.857E-05  1.918E-04  0.000E+00  0.000E+00  3.029E-05   1.4E-01
   30   45  9.912E+02  0.000E+00  0.000E+00  0.000E+00  0.000E+00  0.000E+00  4.132E-06   0.0E+00
   30   46  9.324E+02  1.351E+07  3.522E-03  2.162E-02  0.000E+00  0.000E+00  3.353E-04   1.2E+00
   30   47  9.060E+02  0.000E+00  0.000E+00  0.000E+00  0.000E+00  0.000E+00  3.929E-03   0.0E+00
   30   48  8.106E+02  3.831E+06  7.548E-04  4.029E-03  0.000E+00  0.000E+00  2.247E-02   8.6E-01
   30   49  7.755E+02  0.000E+00  0.000E+00  0.000E+00  0.000E+00  0.000E+00  4.579E-03   0.0E+00
   30   52  5.559E+02  2.738E+08  1.268E-02  4.643E-02  0.000E+00  0.000E+00  0.000E+00   7.7E-01
   30   53  5.481E+02  0.000E+00  0.000E+00  0.000E+00  0.000E+00  0.000E+00  9.048E-02   0.0E+00
   30   55  5.063E+02  2.392E+08  1.839E-02  6.130E-02  0.000E+00  0.000E+00  3.721E-02   8.2E-01
   30   56  5.011E+02  0.000E+00  0.000E+00  0.000E+00  0.000E+00  0.000E+00  4.075E-02   0.0E+00
   30   57  4.729E+02  1.289E+09  8.641E-02  2.691E-01  0.000E+00  0.000E+00  6.439E-02   8.8E-01
   30   58  4.732E+02  1.519E+09  5.099E-02  1.589E-01  0.000E+00  0.000E+00  0.000E+00   6.4E-01
   30   59  3.715E+02  0.000E+00  0.000E+00  0.000E+00  0.000E+00  0.000E+00  8.805E-01   0.0E+00
   30   60  3.622E+02  1.693E+09  6.661E-02  1.589E-01  0.000E+00  0.000E+00  6.275E-02   1.3E+00
   30   61  3.115E+02  0.000E+00  0.000E+00  0.000E+00  6.239E-02  0.000E+00  0.000E+00   0.0E+00
   30   62  2.951E+02  0.000E+00  0.000E+00  0.000E+00  3.669E-01  1.632E-01  0.000E+00   0.0E+00
   30   63  2.823E+02  0.000E+00  0.000E+00  0.000E+00  0.000E+00  2.957E+01  0.000E+00   0.0E+00
   30   64  2.658E+02  0.000E+00  0.000E+00  0.000E+00  2.135E+02  3.422E+00  0.000E+00   0.0E+00
   30   65  2.510E+02  0.000E+00  0.000E+00  0.000E+00  0.000E+00  1.503E+00  0.000E+00   0.0E+00
   30   66  2.072E+02  3.403E+05  4.381E-06  5.977E-06  0.000E+00  0.000E+00  1.773E-02   7.0E-01
   30   68  1.965E+02  0.000E+00  0.000E+00  0.000E+00  0.000E+00  0.000E+00  1.992E+00   0.0E+00
   30   69  1.928E+02  3.382E+06  3.768E-05  4.783E-05  0.000E+00  0.000E+00  2.576E+00   5.2E+00
   30   70  1.891E+02  0.000E+00  0.000E+00  0.000E+00  0.000E+00  0.000E+00  1.644E-02   0.0E+00
   30   71  1.890E+02  3.259E+08  1.745E-03  2.171E-03  0.000E+00  0.000E+00  0.000E+00   7.5E-01
   30   72  1.851E+02  8.538E+06  8.771E-05  1.069E-04  0.000E+00  0.000E+00  2.703E+00   2.3E+00
   30   73  1.837E+02  0.000E+00  0.000E+00  0.000E+00  0.000E+00  0.000E+00  7.344E+00   0.0E+00
   30   74  1.828E+02  2.744E+08  1.374E-03  1.654E-03  0.000E+00  0.000E+00  0.000E+00   6.9E-01
   30   75  1.826E+02  4.730E+08  4.730E-03  5.688E-03  0.000E+00  0.000E+00  6.941E+00   1.2E+00
   30   76  1.804E+02  1.288E+09  6.287E-03  7.469E-03  0.000E+00  0.000E+00  0.000E+00   1.2E+00
   30   77  1.773E+02  1.710E+09  1.612E-02  1.882E-02  0.000E+00  0.000E+00  4.114E+00   1.2E+00
   30   78  1.686E+02  0.000E+00  0.000E+00  0.000E+00  1.612E+02  1.699E+01  0.000E+00   0.0E+00
   30   79  1.680E+02  0.000E+00  0.000E+00  0.000E+00  0.000E+00  4.037E-01  0.000E+00   0.0E+00
   30   80  1.659E+02  1.735E+08  7.154E-04  7.812E-04  0.000E+00  0.000E+00  0.000E+00   6.5E-02
   30   81  1.389E+02  0.000E+00  0.000E+00  0.000E+00  0.000E+00  3.192E-01  0.000E+00   0.0E+00
   30   82  1.381E+02  0.000E+00  0.000E+00  0.000E+00  1.733E-01  9.908E-03  0.000E+00   0.0E+00
   30   84  1.366E+02  0.000E+00  0.000E+00  0.000E+00  7.700E+01  0.000E+00  0.000E+00   0.0E+00
   30   86  1.341E+02  0.000E+00  0.000E+00  0.000E+00  5.421E+01  0.000E+00  0.000E+00   0.0E+00
   30   87  1.327E+02  0.000E+00  0.000E+00  0.000E+00  1.562E+02  3.547E-01  0.000E+00   0.0E+00
   30   89  1.303E+02  7.122E+08  3.625E-03  3.110E-03  0.000E+00  0.000E+00  1.135E+00   3.8E+00
   30   90  1.294E+02  0.000E+00  0.000E+00  0.000E+00  0.000E+00  7.454E-01  0.000E+00   0.0E+00
   30   91  1.290E+02  0.000E+00  0.000E+00  0.000E+00  0.000E+00  0.000E+00  1.213E+01   0.0E+00
   30   92  1.291E+02  0.000E+00  0.000E+00  0.000E+00  2.228E+02  0.000E+00  0.000E+00   0.0E+00
   30   93  1.288E+02  0.000E+00  0.000E+00  0.000E+00  1.739E+02  2.382E+00  0.000E+00   0.0E+00
   30   95  1.280E+02  0.000E+00  0.000E+00  0.000E+00  3.835E+03  0.000E+00  0.000E+00   0.0E+00
   30   96  1.270E+02  2.135E+10  5.164E-02  4.320E-02  0.000E+00  0.000E+00  0.000E+00   9.7E-01
   30   97  1.265E+02  4.564E+09  2.189E-02  1.823E-02  0.000E+00  0.000E+00  8.065E+00   9.1E-01
   30   98  1.264E+02  0.000E+00  0.000E+00  0.000E+00  1.408E+03  9.162E-01  0.000E+00   0.0E+00
   30   99  1.251E+02  0.000E+00  0.000E+00  0.000E+00  4.026E+02  0.000E+00  0.000E+00   0.0E+00
   30  100  1.232E+02  7.821E+09  1.779E-02  1.443E-02  0.000E+00  0.000E+00  0.000E+00   3.1E-01
   30  101  1.223E+02  0.000E+00  0.000E+00  0.000E+00  0.000E+00  1.523E-01  0.000E+00   0.0E+00
   30  102  1.195E+02  0.000E+00  0.000E+00  0.000E+00  1.526E+04  7.264E-03  0.000E+00   0.0E+00
   31   32  7.396E+03  0.000E+00  0.000E+00  0.000E+00  6.668E-03  3.091E+01  0.000E+00   0.0E+00
   31   33  6.914E+03  0.000E+00  0.000E+00  0.000E+00  0.000E+00  0.000E+00  2.370E-08   0.0E+00
   31   34  6.396E+03  2.819E+01  2.593E-07  2.184E-05  0.000E+00  0.000E+00  2.813E-10   3.9E-01
   31   35  5.124E+03  1.193E-01  4.695E-10  3.168E-08  0.000E+00  0.000E+00  1.052E-09   1.1E+04
   31   36  4.051E+03  2.118E+02  2.606E-07  1.390E-05  0.000E+00  0.000E+00  5.579E-08   1.2E+00
   31   38  2.266E+03  0.000E+00  0.000E+00  0.000E+00  0.000E+00  0.000E+00  1.354E-06   0.0E+00
   31   39  1.934E+03  6.711E+03  1.881E-06  4.791E-05  0.000E+00  0.000E+00  3.100E-06   4.4E+00
   31   40  1.699E+03  3.049E+03  1.980E-06  4.431E-05  0.000E+00  0.000E+00  1.213E-05   7.0E+01
   31   41  1.686E+03  1.358E+04  5.786E-06  1.285E-04  0.000E+00  0.000E+00  3.354E-06   1.5E+00
   31   42  1.525E+03  1.568E+05  2.733E-05  5.490E-04  0.000E+00  0.000E+00  2.037E-05   2.3E-01
   31   43  1.503E+03  4.490E+03  1.521E-06  3.012E-05  0.000E+00  0.000E+00  6.036E-07   4.7E+00
   31   44  1.506E+03  0.000E+00  0.000E+00  0.000E+00  0.000E+00  0.000E+00  8.180E-07   0.0E+00
   31   45  1.442E+03  2.247E+02  1.051E-07  1.995E-06  0.000E+00  0.000E+00  9.725E-05   1.0E+03
   31   46  1.321E+03  9.222E+04  2.412E-05  4.194E-04  0.000E+00  0.000E+00  2.965E-05   1.5E-01
   31   47  1.268E+03  3.483E+02  1.260E-07  2.105E-06  0.000E+00  0.000E+00  2.136E-05   1.4E+01
   31   48  1.089E+03  2.219E+06  3.945E-04  5.658E-03  0.000E+00  0.000E+00  2.154E-05   2.0E+00
   31   49  1.026E+03  1.044E+04  2.474E-06  3.345E-05  0.000E+00  0.000E+00  6.854E-04   1.7E+02
   31   50  7.868E+02  0.000E+00  0.000E+00  0.000E+00  0.000E+00  0.000E+00  3.103E-05   0.0E+00
   31   52  6.741E+02  2.461E+07  8.385E-04  7.443E-03  0.000E+00  0.000E+00  4.881E-03   1.5E+00
   31   53  6.626E+02  1.936E+06  1.912E-04  1.669E-03  0.000E+00  0.000E+00  2.235E-03   2.2E-01
   31   54  6.468E+02  0.000E+00  0.000E+00  0.000E+00  0.000E+00  0.000E+00  4.773E-04   0.0E+00
   31   55  6.025E+02  1.424E+07  7.752E-04  6.150E-03  0.000E+00  0.000E+00  3.594E-06   1.3E+00
   31   56  5.952E+02  3.502E+07  2.790E-03  2.187E-02  0.000E+00  0.000E+00  6.464E-03   2.8E-01
   31   57  5.558E+02  4.114E+04  1.905E-06  1.394E-05  0.000E+00  0.000E+00  1.083E-03   1.0E+02
   31   58  5.562E+02  1.469E+07  3.406E-04  2.495E-03  0.000E+00  0.000E+00  8.840E-03   6.4E-01
   31   59  4.208E+02  5.775E+09  2.300E-01  1.275E+00  0.000E+00  0.000E+00  4.564E+00   1.1E+00
   31   60  4.089E+02  1.031E+09  2.584E-02  1.392E-01  0.000E+00  0.000E+00  2.961E-04   1.0E+00
   31   61  3.454E+02  0.000E+00  0.000E+00  0.000E+00  1.179E-02  5.129E+00  0.000E+00   0.0E+00
   31   62  3.254E+02  0.000E+00  0.000E+00  0.000E+00  1.197E-01  7.858E+00  0.000E+00   0.0E+00
   31   63  3.099E+02  0.000E+00  0.000E+00  0.000E+00  4.411E-01  1.528E+01  0.000E+00   0.0E+00
   31   64  2.901E+02  0.000E+00  0.000E+00  0.000E+00  1.673E+02  1.081E+00  0.000E+00   0.0E+00
   31   65  2.726E+02  0.000E+00  0.000E+00  0.000E+00  5.819E+02  3.834E+00  0.000E+00   0.0E+00
   31   66  2.217E+02  8.349E+06  6.152E-05  1.796E-04  0.000E+00  0.000E+00  1.309E+00   3.2E-01
   31   67  2.100E+02  0.000E+00  0.000E+00  0.000E+00  0.000E+00  0.000E+00  8.105E+00   0.0E+00
   31   68  2.095E+02  1.324E+08  1.307E-03  3.606E-03  0.000E+00  0.000E+00  1.407E-01   7.3E-01
   31   69  2.052E+02  2.554E+07  1.613E-04  4.360E-04  0.000E+00  0.000E+00  1.713E+00   1.3E+00
   31   70  2.011E+02  3.520E+08  3.201E-03  8.475E-03  0.000E+00  0.000E+00  3.155E+00   8.9E-01
   31   71  2.009E+02  6.056E+06  1.833E-05  4.851E-05  0.000E+00  0.000E+00  1.595E+00   2.6E-01
   31   72  1.966E+02  5.267E+08  3.051E-03  7.899E-03  0.000E+00  0.000E+00  3.043E+00   9.0E-01
   31   73  1.950E+02  2.727E+07  2.332E-04  5.989E-04  0.000E+00  0.000E+00  2.564E-02   2.4E+00
   31   74  1.939E+02  6.836E+07  1.928E-04  4.923E-04  0.000E+00  0.000E+00  7.713E-01   4.7E-01
   31   75  1.938E+02  6.538E+08  3.681E-03  9.395E-03  0.000E+00  0.000E+00  7.238E-01   6.5E-01
   31   76  1.913E+02  5.305E+07  1.456E-04  3.668E-04  0.000E+00  0.000E+00  3.879E+00   3.4E+00
   31   77  1.878E+02  6.548E+06  3.463E-05  8.563E-05  0.000E+00  0.000E+00  7.451E-01   1.3E-01
   31   78  1.780E+02  0.000E+00  0.000E+00  0.000E+00  3.364E+02  5.457E-01  0.000E+00   0.0E+00
   31   79  1.774E+02  0.000E+00  0.000E+00  0.000E+00  2.740E+01  2.600E-01  0.000E+00   0.0E+00
   31   80  1.750E+02  6.095E+07  1.399E-04  3.225E-04  0.000E+00  0.000E+00  1.928E+00   5.4E+00
   31   81  1.452E+02  0.000E+00  0.000E+00  0.000E+00  2.873E-01  1.152E+00  0.000E+00   0.0E+00
   31   82  1.443E+02  0.000E+00  0.000E+00  0.000E+00  2.781E+00  1.267E+00  0.000E+00   0.0E+00
   31   84  1.427E+02  0.000E+00  0.000E+00  0.000E+00  5.991E+00  5.193E-02  0.000E+00   0.0E+00
   31   85  1.419E+02  0.000E+00  0.000E+00  0.000E+00  1.445E+01  0.000E+00  0.000E+00   0.0E+00
   31   86  1.401E+02  0.000E+00  0.000E+00  0.000E+00  1.422E+01  3.133E-01  0.000E+00   0.0E+00
   31   87  1.385E+02  0.000E+00  0.000E+00  0.000E+00  7.788E+01  1.656E-01  0.000E+00   0.0E+00
   31   88  1.372E+02  0.000E+00  0.000E+00  0.000E+00  3.962E+02  0.000E+00  0.000E+00   0.0E+00
   31   89  1.359E+02  7.080E+08  1.960E-03  3.506E-03  0.000E+00  0.000E+00  2.414E-02   1.9E+00
   31   90  1.349E+02  0.000E+00  0.000E+00  0.000E+00  1.638E+02  1.674E+00  0.000E+00   0.0E+00
   31   91  1.345E+02  8.680E+09  3.532E-02  6.257E-02  0.000E+00  0.000E+00  1.616E+00   2.0E+00
   31   92  1.345E+02  0.000E+00  0.000E+00  0.000E+00  2.736E+01  6.619E+00  0.000E+00   0.0E+00
   31   93  1.342E+02  0.000E+00  0.000E+00  0.000E+00  1.046E+02  2.696E-02  0.000E+00   0.0E+00
   31   94  1.341E+02  0.000E+00  0.000E+00  0.000E+00  6.730E+03  0.000E+00  0.000E+00   0.0E+00
   31   95  1.334E+02  0.000E+00  0.000E+00  0.000E+00  6.107E+03  5.662E-01  0.000E+00   0.0E+00
   31   96  1.323E+02  2.858E+09  3.752E-03  6.539E-03  0.000E+00  0.000E+00  1.918E-01   2.1E+00
   31   97  1.317E+02  9.763E+09  2.540E-02  4.405E-02  0.000E+00  0.000E+00  5.517E-01   1.8E+00
   31   98  1.316E+02  0.000E+00  0.000E+00  0.000E+00  5.773E+03  3.891E+00  0.000E+00   0.0E+00
   31   99  1.302E+02  0.000E+00  0.000E+00  0.000E+00  1.105E+03  4.177E+00  0.000E+00   0.0E+00
   31  100  1.282E+02  9.025E+09  1.111E-02  1.875E-02  0.000E+00  0.000E+00  2.521E+00   1.4E+00
   31  101  1.272E+02  0.000E+00  0.000E+00  0.000E+00  1.567E+04  5.358E+00  0.000E+00   0.0E+00
   31  102  1.242E+02  0.000E+00  0.000E+00  0.000E+00  6.438E+03  8.751E-01  0.000E+00   0.0E+00
   32   34  4.732E+04  0.000E+00  0.000E+00  0.000E+00  0.000E+00  0.000E+00  2.061E-12   0.0E+00
   32   35  1.668E+04  3.286E+00  2.741E-07  3.011E-05  0.000E+00  0.000E+00  1.220E-10   9.9E+01
   32   36  8.958E+03  2.439E+01  2.934E-07  1.731E-05  0.000E+00  0.000E+00  0.000E+00   1.1E+02
   32   39  2.619E+03  5.567E+02  5.723E-07  9.867E-06  0.000E+00  0.000E+00  0.000E+00   6.6E+00
   32   40  2.206E+03  0.000E+00  0.000E+00  0.000E+00  0.000E+00  0.000E+00  7.056E-06   0.0E+00
   32   41  2.184E+03  1.443E+04  2.064E-05  2.968E-04  0.000E+00  0.000E+00  1.021E-05   5.6E+00
   32   42  1.921E+03  9.387E+04  5.196E-05  6.573E-04  0.000E+00  0.000E+00  0.000E+00   2.2E-01
   32   43  1.887E+03  6.697E+03  7.149E-06  8.881E-05  0.000E+00  0.000E+00  2.137E-06   2.1E+01
   32   45  1.791E+03  0.000E+00  0.000E+00  0.000E+00  0.000E+00  0.000E+00  2.258E-07   0.0E+00
   32   46  1.608E+03  2.504E+05  1.941E-04  2.055E-03  0.000E+00  0.000E+00  8.024E-06   9.6E-02
   32   47  1.531E+03  0.000E+00  0.000E+00  0.000E+00  0.000E+00  0.000E+00  3.072E-04   0.0E+00
   32   48  1.277E+03  7.665E+05  3.748E-04  3.152E-03  0.000E+00  0.000E+00  1.009E-03   5.1E-03
   32   49  1.192E+03  0.000E+00  0.000E+00  0.000E+00  0.000E+00  0.000E+00  6.077E-04   0.0E+00
   32   52  7.417E+02  4.687E+06  3.866E-04  1.888E-03  0.000E+00  0.000E+00  0.000E+00   3.0E-02
   32   53  7.278E+02  0.000E+00  0.000E+00  0.000E+00  0.000E+00  0.000E+00  7.430E-03   0.0E+00
   32   55  6.560E+02  9.055E+06  1.168E-03  5.046E-03  0.000E+00  0.000E+00  1.770E-03   2.2E-01
   32   56  6.473E+02  0.000E+00  0.000E+00  0.000E+00  0.000E+00  0.000E+00  4.187E-03   0.0E+00
   32   57  6.009E+02  1.483E+08  1.606E-02  6.355E-02  0.000E+00  0.000E+00  3.105E-03   2.4E-01
   32   58  6.014E+02  2.174E+08  1.179E-02  4.667E-02  0.000E+00  0.000E+00  0.000E+00   6.1E-01
   32   59  4.462E+02  0.000E+00  0.000E+00  0.000E+00  0.000E+00  0.000E+00  3.256E-01   0.0E+00
   32   60  4.329E+02  3.485E+09  1.958E-01  5.580E-01  0.000E+00  0.000E+00  9.188E-02   9.0E-01
   32   61  3.623E+02  0.000E+00  0.000E+00  0.000E+00  4.266E-04  0.000E+00  0.000E+00   0.0E+00
   32   62  3.404E+02  0.000E+00  0.000E+00  0.000E+00  1.218E-03  3.252E-01  0.000E+00   0.0E+00
   32   63  3.234E+02  0.000E+00  0.000E+00  0.000E+00  0.000E+00  2.888E+00  0.000E+00   0.0E+00
   32   64  3.019E+02  0.000E+00  0.000E+00  0.000E+00  4.831E+01  1.063E-01  0.000E+00   0.0E+00
   32   65  2.830E+02  0.000E+00  0.000E+00  0.000E+00  0.000E+00  3.585E-01  0.000E+00   0.0E+00
   32   66  2.285E+02  6.624E+05  1.037E-05  1.561E-05  0.000E+00  0.000E+00  1.539E+00   1.1E-01
   32   68  2.156E+02  0.000E+00  0.000E+00  0.000E+00  0.000E+00  0.000E+00  2.628E+00   0.0E+00
   32   69  2.111E+02  1.245E+08  1.664E-03  2.312E-03  0.000E+00  0.000E+00  6.044E-01   7.4E-01
   32   70  2.067E+02  0.000E+00  0.000E+00  0.000E+00  0.000E+00  0.000E+00  1.313E-01   0.0E+00
   32   71  2.066E+02  5.707E+06  3.651E-05  4.965E-05  0.000E+00  0.000E+00  0.000E+00   4.1E+00
   32   72  2.019E+02  3.978E+08  4.864E-03  6.467E-03  0.000E+00  0.000E+00  8.931E-03   7.4E-01
   32   73  2.003E+02  0.000E+00  0.000E+00  0.000E+00  0.000E+00  0.000E+00  1.520E+00   0.0E+00
   32   74  1.992E+02  9.873E+07  5.872E-04  7.700E-04  0.000E+00  0.000E+00  0.000E+00   1.1E+00
   32   75  1.990E+02  6.119E+08  7.266E-03  9.521E-03  0.000E+00  0.000E+00  1.145E+00   1.0E+00
   32   76  1.964E+02  2.013E+09  1.164E-02  1.506E-02  0.000E+00  0.000E+00  0.000E+00   8.6E-01
   32   77  1.927E+02  3.149E+09  3.507E-02  4.449E-02  0.000E+00  0.000E+00  1.988E+00   9.7E-01
   32   78  1.824E+02  0.000E+00  0.000E+00  0.000E+00  6.326E+02  6.648E+00  0.000E+00   0.0E+00
   32   79  1.818E+02  0.000E+00  0.000E+00  0.000E+00  0.000E+00  4.388E-01  0.000E+00   0.0E+00
   32   80  1.792E+02  2.442E+08  1.176E-03  1.388E-03  0.000E+00  0.000E+00  0.000E+00   2.4E+00
   32   81  1.481E+02  0.000E+00  0.000E+00  0.000E+00  0.000E+00  1.773E+00  0.000E+00   0.0E+00
   32   82  1.472E+02  0.000E+00  0.000E+00  0.000E+00  8.070E-01  1.790E-01  0.000E+00   0.0E+00
   32   84  1.455E+02  0.000E+00  0.000E+00  0.000E+00  5.908E+00  0.000E+00  0.000E+00   0.0E+00
   32   86  1.428E+02  0.000E+00  0.000E+00  0.000E+00  1.072E+02  0.000E+00  0.000E+00   0.0E+00
   32   87  1.411E+02  0.000E+00  0.000E+00  0.000E+00  1.581E+02  5.617E-01  0.000E+00   0.0E+00
   32   89  1.384E+02  8.034E+09  4.615E-02  4.206E-02  0.000E+00  0.000E+00  1.272E-01   1.7E+00
   32   90  1.374E+02  0.000E+00  0.000E+00  0.000E+00  0.000E+00  1.584E+00  0.000E+00   0.0E+00
   32   91  1.370E+02  0.000E+00  0.000E+00  0.000E+00  0.000E+00  0.000E+00  7.194E+00   0.0E+00
   32   92  1.370E+02  0.000E+00  0.000E+00  0.000E+00  1.156E+02  0.000E+00  0.000E+00   0.0E+00
   32   93  1.367E+02  0.000E+00  0.000E+00  0.000E+00  9.948E+01  3.645E+00  0.000E+00   0.0E+00
   32   95  1.359E+02  0.000E+00  0.000E+00  0.000E+00  1.291E+02  0.000E+00  0.000E+00   0.0E+00
   32   96  1.348E+02  1.029E+08  2.800E-04  2.485E-04  0.000E+00  0.000E+00  0.000E+00   1.4E+01
   32   97  1.341E+02  6.313E+07  3.405E-04  3.006E-04  0.000E+00  0.000E+00  1.356E+00   1.2E-01
   32   98  1.340E+02  0.000E+00  0.000E+00  0.000E+00  4.068E+03  2.751E-02  0.000E+00   0.0E+00
   32   99  1.325E+02  0.000E+00  0.000E+00  0.000E+00  6.068E+03  0.000E+00  0.000E+00   0.0E+00
   32  100  1.304E+02  1.659E+10  4.231E-02  3.634E-02  0.000E+00  0.000E+00  0.000E+00   9.1E-01
   32  101  1.295E+02  0.000E+00  0.000E+00  0.000E+00  0.000E+00  1.957E-02  0.000E+00   0.0E+00
   32  102  1.263E+02  0.000E+00  0.000E+00  0.000E+00  4.048E+04  8.648E+00  0.000E+00   0.0E+00
   33   34  8.540E+04  0.000E+00  0.000E+00  0.000E+00  5.444E-09  4.641E-02  0.000E+00   0.0E+00
   33   35  1.979E+04  0.000E+00  0.000E+00  0.000E+00  6.778E-06  0.000E+00  0.000E+00   0.0E+00
   33   37  4.844E+03  0.000E+00  0.000E+00  0.000E+00  1.177E-02  1.941E+01  0.000E+00   0.0E+00
   33   38  3.370E+03  0.000E+00  0.000E+00  0.000E+00  6.311E-03  4.104E+00  0.000E+00   0.0E+00
   33   40  2.253E+03  0.000E+00  0.000E+00  0.000E+00  5.296E-02  6.247E+01  0.000E+00   0.0E+00
   33   41  2.230E+03  0.000E+00  0.000E+00  0.000E+00  6.485E-01  0.000E+00  0.000E+00   0.0E+00
   33   43  1.921E+03  0.000E+00  0.000E+00  0.000E+00  4.236E-02  0.000E+00  0.000E+00   0.0E+00
   33   44  1.925E+03  0.000E+00  0.000E+00  0.000E+00  5.382E-03  2.175E+02  0.000E+00   0.0E+00
   33   45  1.822E+03  0.000E+00  0.000E+00  0.000E+00  7.075E-01  7.345E+00  0.000E+00   0.0E+00
   33   46  1.633E+03  0.000E+00  0.000E+00  0.000E+00  8.555E-02  0.000E+00  0.000E+00   0.0E+00
   33   47  1.553E+03  0.000E+00  0.000E+00  0.000E+00  3.594E-01  6.260E+02  0.000E+00   0.0E+00
   33   48  1.293E+03  0.000E+00  0.000E+00  0.000E+00  4.119E-01  0.000E+00  0.000E+00   0.0E+00
   33   49  1.206E+03  0.000E+00  0.000E+00  0.000E+00  3.233E-02  2.147E+02  0.000E+00   0.0E+00
   33   50  8.878E+02  0.000E+00  0.000E+00  0.000E+00  1.960E-04  4.446E+01  0.000E+00   0.0E+00
   33   51  8.839E+02  0.000E+00  0.000E+00  0.000E+00  9.488E-04  1.079E+02  0.000E+00   0.0E+00
   33   53  7.329E+02  0.000E+00  0.000E+00  0.000E+00  9.308E-02  2.101E+02  0.000E+00   0.0E+00
   33   54  7.135E+02  0.000E+00  0.000E+00  0.000E+00  5.152E-02  9.283E+02  0.000E+00   0.0E+00
   33   55  6.601E+02  0.000E+00  0.000E+00  0.000E+00  2.618E-04  0.000E+00  0.000E+00   0.0E+00
   33   56  6.513E+02  0.000E+00  0.000E+00  0.000E+00  2.238E+00  2.913E+02  0.000E+00   0.0E+00
   33   57  6.043E+02  0.000E+00  0.000E+00  0.000E+00  5.023E-01  0.000E+00  0.000E+00   0.0E+00
   33   59  4.481E+02  0.000E+00  0.000E+00  0.000E+00  2.867E-04  3.782E+02  0.000E+00   0.0E+00
   33   60  4.346E+02  0.000E+00  0.000E+00  0.000E+00  7.029E-04  0.000E+00  0.000E+00   0.0E+00
   33   61  3.636E+02  2.493E+06  3.704E-05  3.547E-04  0.000E+00  0.000E+00  7.185E-03   4.9E+00
   33   62  3.415E+02  0.000E+00  0.000E+00  0.000E+00  0.000E+00  0.000E+00  1.038E-02   0.0E+00
   33   64  3.028E+02  0.000E+00  0.000E+00  0.000E+00  0.000E+00  0.000E+00  1.245E-01   0.0E+00
   33   66  2.290E+02  0.000E+00  0.000E+00  0.000E+00  1.945E+02  0.000E+00  0.000E+00   0.0E+00
   33   67  2.165E+02  0.000E+00  0.000E+00  0.000E+00  7.104E+01  3.849E+00  0.000E+00   0.0E+00
   33   68  2.161E+02  0.000E+00  0.000E+00  0.000E+00  1.862E+01  1.703E-01  0.000E+00   0.0E+00
   33   69  2.115E+02  0.000E+00  0.000E+00  0.000E+00  3.060E+01  0.000E+00  0.000E+00   0.0E+00
   33   70  2.071E+02  0.000E+00  0.000E+00  0.000E+00  4.000E+02  2.044E+00  0.000E+00   0.0E+00
   33   72  2.023E+02  0.000E+00  0.000E+00  0.000E+00  2.743E+01  0.000E+00  0.000E+00   0.0E+00
   33   73  2.007E+02  0.000E+00  0.000E+00  0.000E+00  3.076E+02  6.746E+00  0.000E+00   0.0E+00
   33   75  1.994E+02  0.000E+00  0.000E+00  0.000E+00  1.294E+02  0.000E+00  0.000E+00   0.0E+00
   33   77  1.931E+02  0.000E+00  0.000E+00  0.000E+00  1.742E+01  0.000E+00  0.000E+00   0.0E+00
   33   78  1.827E+02  0.000E+00  0.000E+00  0.000E+00  0.000E+00  0.000E+00  4.142E-01   0.0E+00
   33   82  1.474E+02  0.000E+00  0.000E+00  0.000E+00  0.000E+00  0.000E+00  1.644E+01   0.0E+00
   33   83  1.463E+02  1.269E+09  5.091E-03  1.962E-02  0.000E+00  0.000E+00  9.336E+01   4.5E-01
   33   84  1.457E+02  2.217E+10  5.292E-02  2.031E-01  0.000E+00  0.000E+00  3.014E+01   8.5E-01
   33   85  1.448E+02  4.193E+09  1.319E-02  5.031E-02  0.000E+00  0.000E+00  1.564E+01   7.3E-01
   33   86  1.430E+02  3.367E+09  7.736E-03  2.913E-02  0.000E+00  0.000E+00  5.333E-02   8.1E-01
   33   87  1.413E+02  0.000E+00  0.000E+00  0.000E+00  0.000E+00  0.000E+00  4.793E+00   0.0E+00
   33   88  1.400E+02  1.556E+09  4.572E-03  1.685E-02  0.000E+00  0.000E+00  1.088E+01   7.5E-01
   33   89  1.386E+02  0.000E+00  0.000E+00  0.000E+00  1.543E+01  0.000E+00  0.000E+00   0.0E+00
   33   91  1.372E+02  0.000E+00  0.000E+00  0.000E+00  4.907E+02  5.032E-01  0.000E+00   0.0E+00
   33   92  1.372E+02  5.083E+08  1.076E-03  3.887E-03  0.000E+00  0.000E+00  3.184E+00   7.8E-01
   33   93  1.369E+02  0.000E+00  0.000E+00  0.000E+00  0.000E+00  0.000E+00  5.285E-02   0.0E+00
   33   94  1.368E+02  1.960E+07  5.495E-05  1.979E-04  0.000E+00  0.000E+00  5.433E+00   1.0E+00
   33   95  1.361E+02  2.219E+08  4.619E-04  1.655E-03  0.000E+00  0.000E+00  1.977E+00   8.5E-01
   33   97  1.343E+02  0.000E+00  0.000E+00  0.000E+00  2.970E+02  0.000E+00  0.000E+00   0.0E+00
   33   98  1.342E+02  0.000E+00  0.000E+00  0.000E+00  0.000E+00  0.000E+00  2.756E+01   0.0E+00
   33   99  1.327E+02  1.660E+05  3.285E-07  1.148E-06  0.000E+00  0.000E+00  3.548E-01   1.3E-01
   33  102  1.264E+02  0.000E+00  0.000E+00  0.000E+00  0.000E+00  0.000E+00  6.281E+01   0.0E+00
   34   35  2.577E+04  0.000E+00  0.000E+00  0.000E+00  8.231E-07  2.921E+00  0.000E+00   0.0E+00
   34   36  1.105E+04  0.000E+00  0.000E+00  0.000E+00  1.797E-04  0.000E+00  0.000E+00   0.0E+00
   34   37  5.136E+03  0.000E+00  0.000E+00  0.000E+00  2.869E-03  0.000E+00  0.000E+00   0.0E+00
   34   38  3.508E+03  0.000E+00  0.000E+00  0.000E+00  1.003E-02  4.072E+00  0.000E+00   0.0E+00
   34   39  2.772E+03  0.000E+00  0.000E+00  0.000E+00  4.434E-01  0.000E+00  0.000E+00   0.0E+00
   34   40  2.314E+03  0.000E+00  0.000E+00  0.000E+00  2.233E-04  1.476E+02  0.000E+00   0.0E+00
   34   41  2.290E+03  0.000E+00  0.000E+00  0.000E+00  8.546E-03  6.088E+01  0.000E+00   0.0E+00
   34   42  2.003E+03  0.000E+00  0.000E+00  0.000E+00  2.615E-02  0.000E+00  0.000E+00   0.0E+00
   34   43  1.965E+03  0.000E+00  0.000E+00  0.000E+00  1.427E-03  2.585E+01  0.000E+00   0.0E+00
   34   44  1.970E+03  0.000E+00  0.000E+00  0.000E+00  2.989E-02  1.644E+01  0.000E+00   0.0E+00
   34   45  1.862E+03  0.000E+00  0.000E+00  0.000E+00  5.938E-01  1.152E+01  0.000E+00   0.0E+00
   34   46  1.664E+03  0.000E+00  0.000E+00  0.000E+00  1.076E-02  5.392E+02  0.000E+00   0.0E+00
   34   47  1.582E+03  0.000E+00  0.000E+00  0.000E+00  2.582E-01  7.901E+01  0.000E+00   0.0E+00
   34   48  1.312E+03  0.000E+00  0.000E+00  0.000E+00  3.742E-02  1.261E+02  0.000E+00   0.0E+00
   34   49  1.223E+03  0.000E+00  0.000E+00  0.000E+00  3.908E-02  2.956E+01  0.000E+00   0.0E+00
   34   50  8.971E+02  0.000E+00  0.000E+00  0.000E+00  1.620E-02  5.243E+01  0.000E+00   0.0E+00
   34   51  8.932E+02  0.000E+00  0.000E+00  0.000E+00  2.201E-01  0.000E+00  0.000E+00   0.0E+00
   34   52  7.535E+02  0.000E+00  0.000E+00  0.000E+00  2.387E+00  0.000E+00  0.000E+00   0.0E+00
   34   53  7.392E+02  0.000E+00  0.000E+00  0.000E+00  3.301E-02  1.567E+02  0.000E+00   0.0E+00
   34   54  7.195E+02  0.000E+00  0.000E+00  0.000E+00  8.815E-01  2.631E+02  0.000E+00   0.0E+00
   34   55  6.652E+02  0.000E+00  0.000E+00  0.000E+00  3.961E-03  1.419E+02  0.000E+00   0.0E+00
   34   56  6.563E+02  0.000E+00  0.000E+00  0.000E+00  1.246E+00  7.162E+02  0.000E+00   0.0E+00
   34   57  6.087E+02  0.000E+00  0.000E+00  0.000E+00  2.223E-05  6.618E+00  0.000E+00   0.0E+00
   34   58  6.092E+02  0.000E+00  0.000E+00  0.000E+00  1.214E-01  0.000E+00  0.000E+00   0.0E+00
   34   59  4.505E+02  0.000E+00  0.000E+00  0.000E+00  1.203E-01  1.594E+02  0.000E+00   0.0E+00
   34   60  4.369E+02  0.000E+00  0.000E+00  0.000E+00  2.562E-01  3.987E+01  0.000E+00   0.0E+00
   34   61  3.651E+02  5.455E+05  1.090E-05  7.863E-05  0.000E+00  0.000E+00  3.822E-03   9.0E+00
   34   62  3.428E+02  1.279E+06  1.503E-05  1.018E-04  0.000E+00  0.000E+00  3.683E-04   6.2E+00
   34   63  3.256E+02  0.000E+00  0.000E+00  0.000E+00  0.000E+00  0.000E+00  1.863E-04   0.0E+00
   34   64  3.039E+02  2.751E+05  2.539E-06  1.524E-05  0.000E+00  0.000E+00  1.066E-03   2.3E-01
   34   65  2.848E+02  0.000E+00  0.000E+00  0.000E+00  0.000E+00  0.000E+00  3.376E-02   0.0E+00
   34   66  2.296E+02  0.000E+00  0.000E+00  0.000E+00  2.292E+02  4.128E-01  0.000E+00   0.0E+00
   34   67  2.171E+02  0.000E+00  0.000E+00  0.000E+00  4.483E+01  9.924E-01  0.000E+00   0.0E+00
   34   68  2.166E+02  0.000E+00  0.000E+00  0.000E+00  7.732E+01  3.952E+00  0.000E+00   0.0E+00
   34   69  2.121E+02  0.000E+00  0.000E+00  0.000E+00  1.354E+01  1.545E+00  0.000E+00   0.0E+00
   34   70  2.076E+02  0.000E+00  0.000E+00  0.000E+00  1.920E+02  4.810E+00  0.000E+00   0.0E+00
   34   71  2.075E+02  0.000E+00  0.000E+00  0.000E+00  6.744E+00  0.000E+00  0.000E+00   0.0E+00
   34   72  2.028E+02  0.000E+00  0.000E+00  0.000E+00  1.084E+01  1.191E+00  0.000E+00   0.0E+00
   34   73  2.011E+02  0.000E+00  0.000E+00  0.000E+00  1.250E+02  1.406E+00  0.000E+00   0.0E+00
   34   74  2.000E+02  0.000E+00  0.000E+00  0.000E+00  1.346E+02  0.000E+00  0.000E+00   0.0E+00
   34   75  1.999E+02  0.000E+00  0.000E+00  0.000E+00  7.905E+00  7.175E-02  0.000E+00   0.0E+00
   34   76  1.972E+02  0.000E+00  0.000E+00  0.000E+00  3.119E+01  0.000E+00  0.000E+00   0.0E+00
   34   77  1.935E+02  0.000E+00  0.000E+00  0.000E+00  5.506E+00  2.644E-01  0.000E+00   0.0E+00
   34   78  1.831E+02  4.817E+05  1.615E-06  5.842E-06  0.000E+00  0.000E+00  8.473E-03   3.0E-02
   34   79  1.824E+02  0.000E+00  0.000E+00  0.000E+00  0.000E+00  0.000E+00  2.237E-01   0.0E+00
   34   80  1.799E+02  0.000E+00  0.000E+00  0.000E+00  1.758E+01  0.000E+00  0.000E+00   0.0E+00
   34   81  1.486E+02  0.000E+00  0.000E+00  0.000E+00  0.000E+00  0.000E+00  3.234E+01   0.0E+00
   34   82  1.477E+02  2.112E+10  4.604E-02  1.343E-01  0.000E+00  0.000E+00  3.714E+01   8.6E-01
   34   83  1.466E+02  0.000E+00  0.000E+00  0.000E+00  0.000E+00  0.000E+00  1.156E+01   0.0E+00
   34   84  1.460E+02  5.650E+09  1.805E-02  5.203E-02  0.000E+00  0.000E+00  4.448E+00   7.8E-01
   34   85  1.451E+02  9.649E+08  4.060E-03  1.163E-02  0.000E+00  0.000E+00  5.057E+01   4.5E-01
   34   86  1.432E+02  2.248E+09  6.911E-03  1.955E-02  0.000E+00  0.000E+00  2.204E+00   6.7E-01
   34   87  1.415E+02  1.270E+09  2.544E-03  7.112E-03  0.000E+00  0.000E+00  6.565E+00   7.5E-01
   34   88  1.402E+02  3.216E+07  1.264E-04  3.501E-04  0.000E+00  0.000E+00  1.288E-02   3.5E-01
   34   89  1.388E+02  0.000E+00  0.000E+00  0.000E+00  2.865E+00  1.477E+00  0.000E+00   0.0E+00
   34   90  1.379E+02  0.000E+00  0.000E+00  0.000E+00  0.000E+00  0.000E+00  2.633E-01   0.0E+00
   34   91  1.374E+02  0.000E+00  0.000E+00  0.000E+00  4.457E+02  1.317E+00  0.000E+00   0.0E+00
   34   92  1.374E+02  1.635E+08  4.628E-04  1.256E-03  0.000E+00  0.000E+00  1.058E+01   6.3E-01
   34   93  1.371E+02  2.726E+08  5.121E-04  1.387E-03  0.000E+00  0.000E+00  3.357E+00   7.2E-01
   34   94  1.370E+02  4.837E+07  1.814E-04  4.910E-04  0.000E+00  0.000E+00  1.174E-02   4.1E-01
   34   95  1.363E+02  2.029E+06  5.648E-06  1.520E-05  0.000E+00  0.000E+00  1.751E+00   4.0E-01
   34   96  1.351E+02  0.000E+00  0.000E+00  0.000E+00  3.518E+00  0.000E+00  0.000E+00   0.0E+00
   34   97  1.345E+02  0.000E+00  0.000E+00  0.000E+00  3.633E+01  2.375E-01  0.000E+00   0.0E+00
   34   98  1.344E+02  5.622E+08  1.015E-03  2.694E-03  0.000E+00  0.000E+00  1.088E+00   8.0E-01
   34   99  1.329E+02  3.671E+05  9.720E-07  2.551E-06  0.000E+00  0.000E+00  1.113E-01   7.0E-01
   34  100  1.308E+02  0.000E+00  0.000E+00  0.000E+00  5.270E+01  0.000E+00  0.000E+00   0.0E+00
   34  101  1.298E+02  0.000E+00  0.000E+00  0.000E+00  0.000E+00  0.000E+00  7.151E+01   0.0E+00
   34  102  1.266E+02  6.755E+08  1.082E-03  2.707E-03  0.000E+00  0.000E+00  2.663E+00   7.6E-01
   35   36  1.935E+04  0.000E+00  0.000E+00  0.000E+00  1.372E-07  9.166E+00  0.000E+00   0.0E+00
   35   38  4.061E+03  0.000E+00  0.000E+00  0.000E+00  5.758E-03  0.000E+00  0.000E+00   0.0E+00
   35   39  3.106E+03  0.000E+00  0.000E+00  0.000E+00  1.448E-01  1.389E-02  0.000E+00   0.0E+00
   35   40  2.543E+03  0.000E+00  0.000E+00  0.000E+00  3.652E-02  1.150E+01  0.000E+00   0.0E+00
   35   41  2.513E+03  0.000E+00  0.000E+00  0.000E+00  1.532E-01  2.219E+02  0.000E+00   0.0E+00
   35   42  2.172E+03  0.000E+00  0.000E+00  0.000E+00  1.736E-03  4.642E+02  0.000E+00   0.0E+00
   35   43  2.127E+03  0.000E+00  0.000E+00  0.000E+00  1.103E-01  6.093E+01  0.000E+00   0.0E+00
   35   44  2.133E+03  0.000E+00  0.000E+00  0.000E+00  3.129E-02  0.000E+00  0.000E+00   0.0E+00
   35   45  2.007E+03  0.000E+00  0.000E+00  0.000E+00  7.814E-02  5.937E+00  0.000E+00   0.0E+00
   35   46  1.779E+03  0.000E+00  0.000E+00  0.000E+00  6.171E-02  6.974E-01  0.000E+00   0.0E+00
   35   47  1.686E+03  0.000E+00  0.000E+00  0.000E+00  7.622E-02  2.410E+00  0.000E+00   0.0E+00
   35   48  1.383E+03  0.000E+00  0.000E+00  0.000E+00  6.987E-02  4.005E+01  0.000E+00   0.0E+00
   35   49  1.284E+03  0.000E+00  0.000E+00  0.000E+00  1.086E-02  3.516E+01  0.000E+00   0.0E+00
   35   50  9.295E+02  0.000E+00  0.000E+00  0.000E+00  1.190E-01  0.000E+00  0.000E+00   0.0E+00
   35   52  7.762E+02  0.000E+00  0.000E+00  0.000E+00  6.069E-01  1.879E+02  0.000E+00   0.0E+00
   35   53  7.611E+02  0.000E+00  0.000E+00  0.000E+00  5.708E-01  1.225E+02  0.000E+00   0.0E+00
   35   54  7.402E+02  0.000E+00  0.000E+00  0.000E+00  4.017E-01  0.000E+00  0.000E+00   0.0E+00
   35   55  6.828E+02  0.000E+00  0.000E+00  0.000E+00  5.166E-01  2.872E+02  0.000E+00   0.0E+00
   35   56  6.734E+02  0.000E+00  0.000E+00  0.000E+00  1.917E-03  4.189E+02  0.000E+00   0.0E+00
   35   57  6.234E+02  0.000E+00  0.000E+00  0.000E+00  1.028E+00  2.280E+02  0.000E+00   0.0E+00
   35   58  6.239E+02  0.000E+00  0.000E+00  0.000E+00  2.348E+00  5.489E+01  0.000E+00   0.0E+00
   35   59  4.585E+02  0.000E+00  0.000E+00  0.000E+00  1.281E-01  2.677E+02  0.000E+00   0.0E+00
   35   60  4.444E+02  0.000E+00  0.000E+00  0.000E+00  1.124E-04  2.949E+02  0.000E+00   0.0E+00
   35   61  3.704E+02  6.714E+04  2.071E-06  1.010E-05  0.000E+00  0.000E+00  9.759E-04   1.5E+01
   35   62  3.475E+02  7.438E+05  1.346E-05  6.160E-05  0.000E+00  0.000E+00  3.781E-04   9.6E+00
   35   63  3.298E+02  6.765E+05  5.516E-06  2.395E-05  0.000E+00  0.000E+00  4.761E-04   7.6E+00
   35   64  3.075E+02  1.472E+05  2.087E-06  8.452E-06  0.000E+00  0.000E+00  2.310E-03   1.5E-03
   35   65  2.879E+02  6.316E+05  3.925E-06  1.488E-05  0.000E+00  0.000E+00  4.882E-03   1.4E+00
   35   66  2.317E+02  0.000E+00  0.000E+00  0.000E+00  1.882E+02  2.558E-02  0.000E+00   0.0E+00
   35   67  2.189E+02  0.000E+00  0.000E+00  0.000E+00  1.099E+01  0.000E+00  0.000E+00   0.0E+00
   35   68  2.185E+02  0.000E+00  0.000E+00  0.000E+00  6.405E+01  6.850E+00  0.000E+00   0.0E+00
   35   69  2.138E+02  0.000E+00  0.000E+00  0.000E+00  4.935E+00  1.434E+00  0.000E+00   0.0E+00
   35   70  2.093E+02  0.000E+00  0.000E+00  0.000E+00  8.001E+01  3.217E+00  0.000E+00   0.0E+00
   35   71  2.092E+02  0.000E+00  0.000E+00  0.000E+00  4.257E+01  8.336E-01  0.000E+00   0.0E+00
   35   72  2.044E+02  0.000E+00  0.000E+00  0.000E+00  8.673E+00  1.921E+00  0.000E+00   0.0E+00
   35   73  2.027E+02  0.000E+00  0.000E+00  0.000E+00  1.894E+01  4.613E+00  0.000E+00   0.0E+00
   35   74  2.016E+02  0.000E+00  0.000E+00  0.000E+00  1.535E+01  2.170E+00  0.000E+00   0.0E+00
   35   75  2.014E+02  0.000E+00  0.000E+00  0.000E+00  4.798E+01  5.506E+00  0.000E+00   0.0E+00
   35   76  1.988E+02  0.000E+00  0.000E+00  0.000E+00  2.299E+01  1.277E+00  0.000E+00   0.0E+00
   35   77  1.949E+02  0.000E+00  0.000E+00  0.000E+00  1.825E+01  1.066E+00  0.000E+00   0.0E+00
   35   78  1.844E+02  1.021E+06  5.210E-06  1.265E-05  0.000E+00  0.000E+00  1.036E-02   5.4E-02
   35   79  1.838E+02  7.950E+05  2.012E-06  4.869E-06  0.000E+00  0.000E+00  3.558E-02   2.5E-01
   35   80  1.812E+02  0.000E+00  0.000E+00  0.000E+00  1.511E+01  1.441E+00  0.000E+00   0.0E+00
   35   81  1.495E+02  1.927E+10  3.227E-02  6.351E-02  0.000E+00  0.000E+00  6.686E+01   8.6E-01
   35   82  1.485E+02  8.377E+09  2.770E-02  5.418E-02  0.000E+00  0.000E+00  1.391E+00   8.2E-01
   35   84  1.468E+02  2.065E+06  1.001E-05  1.935E-05  0.000E+00  0.000E+00  8.172E+00   1.1E+00
   35   85  1.459E+02  0.000E+00  0.000E+00  0.000E+00  0.000E+00  0.000E+00  1.505E+01   0.0E+00
   35   86  1.440E+02  1.173E+09  5.468E-03  1.037E-02  0.000E+00  0.000E+00  1.363E+01   5.1E-01
   35   87  1.423E+02  2.360E+09  7.166E-03  1.343E-02  0.000E+00  0.000E+00  3.255E+00   6.4E-01
   35   88  1.410E+02  0.000E+00  0.000E+00  0.000E+00  0.000E+00  0.000E+00  3.681E-01   0.0E+00
   35   89  1.396E+02  0.000E+00  0.000E+00  0.000E+00  3.694E+01  2.149E+00  0.000E+00   0.0E+00
   35   90  1.386E+02  7.868E+08  1.133E-03  2.068E-03  0.000E+00  0.000E+00  4.235E-02   6.8E-01
   35   91  1.381E+02  0.000E+00  0.000E+00  0.000E+00  2.464E+02  7.104E-01  0.000E+00   0.0E+00
   35   92  1.381E+02  7.453E+07  3.198E-04  5.819E-04  0.000E+00  0.000E+00  8.799E-01   4.1E-01
   35   93  1.378E+02  9.557E+07  2.722E-04  4.940E-04  0.000E+00  0.000E+00  8.594E+00   5.9E-01
   35   94  1.377E+02  0.000E+00  0.000E+00  0.000E+00  0.000E+00  0.000E+00  4.834E-01   0.0E+00
   35   95  1.370E+02  4.464E+05  1.884E-06  3.399E-06  0.000E+00  0.000E+00  1.523E-01   7.5E-01
   35   96  1.359E+02  0.000E+00  0.000E+00  0.000E+00  4.702E+00  1.834E+00  0.000E+00   0.0E+00
   35   97  1.352E+02  0.000E+00  0.000E+00  0.000E+00  2.221E+02  5.178E-01  0.000E+00   0.0E+00
   35   98  1.351E+02  2.244E+06  6.139E-06  1.092E-05  0.000E+00  0.000E+00  4.744E-01   3.2E-01
   35   99  1.336E+02  1.245E+07  4.997E-05  8.791E-05  0.000E+00  0.000E+00  2.431E+00   6.0E-01
   35  100  1.314E+02  0.000E+00  0.000E+00  0.000E+00  2.802E+01  2.803E-03  0.000E+00   0.0E+00
   35  101  1.305E+02  2.424E+09  3.094E-03  5.317E-03  0.000E+00  0.000E+00  2.281E+01   7.5E-01
   35  102  1.272E+02  4.490E+07  1.090E-04  1.826E-04  0.000E+00  0.000E+00  1.239E+00   5.5E-01
   36   39  3.700E+03  0.000E+00  0.000E+00  0.000E+00  0.000E+00  1.607E+02  0.000E+00   0.0E+00
   36   40  2.927E+03  0.000E+00  0.000E+00  0.000E+00  3.037E-02  0.000E+00  0.000E+00   0.0E+00
   36   41  2.888E+03  0.000E+00  0.000E+00  0.000E+00  1.588E-01  7.208E-02  0.000E+00   0.0E+00
   36   42  2.446E+03  0.000E+00  0.000E+00  0.000E+00  0.000E+00  1.049E+02  0.000E+00   0.0E+00
   36   43  2.390E+03  0.000E+00  0.000E+00  0.000E+00  2.847E-03  6.108E+01  0.000E+00   0.0E+00
   36   45  2.239E+03  0.000E+00  0.000E+00  0.000E+00  2.559E-05  0.000E+00  0.000E+00   0.0E+00
   36   46  1.960E+03  0.000E+00  0.000E+00  0.000E+00  1.828E-03  1.251E+02  0.000E+00   0.0E+00
   36   47  1.847E+03  0.000E+00  0.000E+00  0.000E+00  1.250E-03  0.000E+00  0.000E+00   0.0E+00
   36   48  1.489E+03  0.000E+00  0.000E+00  0.000E+00  7.798E-02  1.407E+02  0.000E+00   0.0E+00
   36   49  1.375E+03  0.000E+00  0.000E+00  0.000E+00  3.685E-03  0.000E+00  0.000E+00   0.0E+00
   36   52  8.087E+02  0.000E+00  0.000E+00  0.000E+00  0.000E+00  1.975E+02  0.000E+00   0.0E+00
   36   53  7.922E+02  0.000E+00  0.000E+00  0.000E+00  1.082E-01  0.000E+00  0.000E+00   0.0E+00
   36   55  7.078E+02  0.000E+00  0.000E+00  0.000E+00  2.891E+00  1.140E+02  0.000E+00   0.0E+00
   36   56  6.977E+02  0.000E+00  0.000E+00  0.000E+00  6.239E-02  0.000E+00  0.000E+00   0.0E+00
   36   57  6.441E+02  0.000E+00  0.000E+00  0.000E+00  6.194E-03  2.394E+02  0.000E+00   0.0E+00
   36   58  6.447E+02  0.000E+00  0.000E+00  0.000E+00  0.000E+00  3.052E+01  0.000E+00   0.0E+00
   36   59  4.696E+02  0.000E+00  0.000E+00  0.000E+00  1.574E-01  0.000E+00  0.000E+00   0.0E+00
   36   60  4.548E+02  0.000E+00  0.000E+00  0.000E+00  5.956E-04  7.881E+02  0.000E+00   0.0E+00
   36   61  3.776E+02  0.000E+00  0.000E+00  0.000E+00  0.000E+00  0.000E+00  1.175E-04   0.0E+00
   36   62  3.538E+02  1.762E+05  6.612E-06  1.540E-05  0.000E+00  0.000E+00  1.709E-04   1.1E+01
   36   63  3.355E+02  9.530E+05  1.608E-05  3.553E-05  0.000E+00  0.000E+00  0.000E+00   7.6E+00
   36   64  3.125E+02  7.717E+03  2.259E-07  4.648E-07  0.000E+00  0.000E+00  3.084E-03   2.1E+00
   36   65  2.923E+02  8.940E+04  1.145E-06  2.204E-06  0.000E+00  0.000E+00  0.000E+00   6.0E+00
   36   66  2.345E+02  0.000E+00  0.000E+00  0.000E+00  1.053E+02  6.175E-01  0.000E+00   0.0E+00
   36   68  2.209E+02  0.000E+00  0.000E+00  0.000E+00  1.598E+01  0.000E+00  0.000E+00   0.0E+00
   36   69  2.162E+02  0.000E+00  0.000E+00  0.000E+00  2.821E+01  5.112E+00  0.000E+00   0.0E+00
   36   70  2.116E+02  0.000E+00  0.000E+00  0.000E+00  1.783E+01  0.000E+00  0.000E+00   0.0E+00
   36   71  2.114E+02  0.000E+00  0.000E+00  0.000E+00  0.000E+00  4.756E-01  0.000E+00   0.0E+00
   36   72  2.066E+02  0.000E+00  0.000E+00  0.000E+00  2.608E-03  1.099E+00  0.000E+00   0.0E+00
   36   73  2.049E+02  0.000E+00  0.000E+00  0.000E+00  5.295E-01  0.000E+00  0.000E+00   0.0E+00
   36   74  2.037E+02  0.000E+00  0.000E+00  0.000E+00  0.000E+00  2.838E-01  0.000E+00   0.0E+00
   36   75  2.035E+02  0.000E+00  0.000E+00  0.000E+00  5.972E+01  2.387E+00  0.000E+00   0.0E+00
   36   76  2.008E+02  0.000E+00  0.000E+00  0.000E+00  0.000E+00  6.204E+00  0.000E+00   0.0E+00
   36   77  1.969E+02  0.000E+00  0.000E+00  0.000E+00  6.138E+00  4.339E+00  0.000E+00   0.0E+00
   36   78  1.862E+02  4.225E+05  4.393E-06  5.387E-06  0.000E+00  0.000E+00  3.267E-03   4.8E-02
   36   79  1.855E+02  2.373E+06  1.224E-05  1.496E-05  0.000E+00  0.000E+00  0.000E+00   1.5E-01
   36   80  1.829E+02  0.000E+00  0.000E+00  0.000E+00  0.000E+00  6.642E-01  0.000E+00   0.0E+00
   36   81  1.506E+02  1.612E+10  5.484E-02  5.440E-02  0.000E+00  0.000E+00  0.000E+00   8.4E-01
   36   82  1.497E+02  3.366E+08  2.261E-03  2.228E-03  0.000E+00  0.000E+00  1.815E+01   7.6E-01
   36   84  1.479E+02  0.000E+00  0.000E+00  0.000E+00  0.000E+00  0.000E+00  2.883E-01   0.0E+00
   36   86  1.451E+02  0.000E+00  0.000E+00  0.000E+00  0.000E+00  0.000E+00  1.548E+01   0.0E+00
   36   87  1.434E+02  1.700E+09  1.048E-02  9.894E-03  0.000E+00  0.000E+00  8.737E-01   5.7E-01
   36   89  1.406E+02  0.000E+00  0.000E+00  0.000E+00  5.275E+01  8.159E-01  0.000E+00   0.0E+00
   36   90  1.396E+02  7.100E+08  2.074E-03  1.906E-03  0.000E+00  0.000E+00  0.000E+00   5.8E-01
   36   91  1.391E+02  0.000E+00  0.000E+00  0.000E+00  6.347E+01  0.000E+00  0.000E+00   0.0E+00
   36   92  1.391E+02  0.000E+00  0.000E+00  0.000E+00  0.000E+00  0.000E+00  1.501E-02   0.0E+00
   36   93  1.388E+02  1.836E+08  1.061E-03  9.699E-04  0.000E+00  0.000E+00  1.913E+00   4.4E-01
   36   95  1.380E+02  0.000E+00  0.000E+00  0.000E+00  0.000E+00  0.000E+00  3.422E-01   0.0E+00
   36   96  1.368E+02  0.000E+00  0.000E+00  0.000E+00  0.000E+00  1.974E+00  0.000E+00   0.0E+00
   36   97  1.361E+02  0.000E+00  0.000E+00  0.000E+00  3.669E+02  3.203E-02  0.000E+00   0.0E+00
   36   98  1.361E+02  2.243E+08  1.245E-03  1.115E-03  0.000E+00  0.000E+00  9.801E-01   7.9E-01
   36   99  1.345E+02  0.000E+00  0.000E+00  0.000E+00  0.000E+00  0.000E+00  3.598E+00   0.0E+00
   36  100  1.324E+02  0.000E+00  0.000E+00  0.000E+00  0.000E+00  4.153E-01  0.000E+00   0.0E+00
   36  101  1.314E+02  1.025E+09  2.652E-03  2.294E-03  0.000E+00  0.000E+00  0.000E+00   7.1E-01
   36  102  1.281E+02  9.126E+07  4.490E-04  3.786E-04  0.000E+00  0.000E+00  1.784E+00   8.9E-01
   37   38  1.107E+04  0.000E+00  0.000E+00  0.000E+00  6.174E-05  1.281E+01  0.000E+00   0.0E+00
   37   40  4.213E+03  0.000E+00  0.000E+00  0.000E+00  6.427E-06  0.000E+00  0.000E+00   0.0E+00
   37   44  3.195E+03  0.000E+00  0.000E+00  0.000E+00  1.587E-02  3.813E+02  0.000E+00   0.0E+00
   37   45  2.921E+03  0.000E+00  0.000E+00  0.000E+00  5.694E-02  0.000E+00  0.000E+00   0.0E+00
   37   47  2.287E+03  0.000E+00  0.000E+00  0.000E+00  3.668E-02  0.000E+00  0.000E+00   0.0E+00
   37   49  1.605E+03  0.000E+00  0.000E+00  0.000E+00  1.412E-02  0.000E+00  0.000E+00   0.0E+00
   37   50  1.087E+03  0.000E+00  0.000E+00  0.000E+00  5.341E-03  2.340E+01  0.000E+00   0.0E+00
   37   51  1.081E+03  0.000E+00  0.000E+00  0.000E+00  2.019E-01  1.032E+03  0.000E+00   0.0E+00
   37   53  8.635E+02  0.000E+00  0.000E+00  0.000E+00  2.070E-01  0.000E+00  0.000E+00   0.0E+00
   37   54  8.368E+02  0.000E+00  0.000E+00  0.000E+00  2.009E+00  4.694E+02  0.000E+00   0.0E+00
   37   56  7.524E+02  0.000E+00  0.000E+00  0.000E+00  1.100E-02  0.000E+00  0.000E+00   0.0E+00
   37   59  4.938E+02  0.000E+00  0.000E+00  0.000E+00  1.469E+00  0.000E+00  0.000E+00   0.0E+00
   37   61  3.931E+02  0.000E+00  0.000E+00  0.000E+00  0.000E+00  0.000E+00  1.128E-02   0.0E+00
   37   67  2.267E+02  0.000E+00  0.000E+00  0.000E+00  8.015E+01  1.265E+01  0.000E+00   0.0E+00
   37   68  2.262E+02  0.000E+00  0.000E+00  0.000E+00  4.188E+01  0.000E+00  0.000E+00   0.0E+00
   37   70  2.164E+02  0.000E+00  0.000E+00  0.000E+00  7.341E+02  0.000E+00  0.000E+00   0.0E+00
   37   73  2.093E+02  0.000E+00  0.000E+00  0.000E+00  7.383E+02  0.000E+00  0.000E+00   0.0E+00
   37   83  1.509E+02  1.680E+10  5.733E-02  2.848E-01  0.000E+00  0.000E+00  7.918E+01   8.5E-01
   37   84  1.502E+02  0.000E+00  0.000E+00  0.000E+00  0.000E+00  0.000E+00  2.313E+00   0.0E+00
   37   85  1.493E+02  1.812E+06  4.845E-06  2.381E-05  0.000E+00  0.000E+00  8.990E+00   3.7E-01
   37   86  1.473E+02  0.000E+00  0.000E+00  0.000E+00  0.000E+00  0.000E+00  9.980E-01   0.0E+00
   37   88  1.441E+02  1.442E+10  3.593E-02  1.705E-01  0.000E+00  0.000E+00  2.243E+01   8.3E-01
   37   91  1.412E+02  0.000E+00  0.000E+00  0.000E+00  1.728E+03  0.000E+00  0.000E+00   0.0E+00
   37   92  1.412E+02  0.000E+00  0.000E+00  0.000E+00  0.000E+00  0.000E+00  1.645E+01   0.0E+00
   37   94  1.407E+02  1.045E+10  2.483E-02  1.150E-01  0.000E+00  0.000E+00  6.313E+00   8.2E-01
   37   95  1.400E+02  0.000E+00  0.000E+00  0.000E+00  0.000E+00  0.000E+00  1.439E+01   0.0E+00
   37   99  1.364E+02  0.000E+00  0.000E+00  0.000E+00  0.000E+00  0.000E+00  1.259E+01   0.0E+00
   38   40  6.801E+03  0.000E+00  0.000E+00  0.000E+00  3.014E-03  9.690E+01  0.000E+00   0.0E+00
   38   41  6.593E+03  0.000E+00  0.000E+00  0.000E+00  3.102E-06  0.000E+00  0.000E+00   0.0E+00
   38   43  4.468E+03  0.000E+00  0.000E+00  0.000E+00  2.136E-03  0.000E+00  0.000E+00   0.0E+00
   38   44  4.492E+03  0.000E+00  0.000E+00  0.000E+00  5.176E-04  1.662E+01  0.000E+00   0.0E+00
   38   45  3.968E+03  0.000E+00  0.000E+00  0.000E+00  5.825E-03  4.398E+01  0.000E+00   0.0E+00
   38   46  3.167E+03  0.000E+00  0.000E+00  0.000E+00  1.210E-02  0.000E+00  0.000E+00   0.0E+00
   38   47  2.882E+03  0.000E+00  0.000E+00  0.000E+00  7.343E-07  1.312E+01  0.000E+00   0.0E+00
   38   48  2.097E+03  0.000E+00  0.000E+00  0.000E+00  5.700E-02  0.000E+00  0.000E+00   0.0E+00
   38   49  1.877E+03  0.000E+00  0.000E+00  0.000E+00  3.127E-02  2.500E+02  0.000E+00   0.0E+00
   38   50  1.205E+03  0.000E+00  0.000E+00  0.000E+00  9.225E-02  8.661E+02  0.000E+00   0.0E+00
   38   51  1.198E+03  0.000E+00  0.000E+00  0.000E+00  9.822E-02  4.979E-02  0.000E+00   0.0E+00
   38   53  9.366E+02  0.000E+00  0.000E+00  0.000E+00  3.204E+00  3.498E+02  0.000E+00   0.0E+00
   38   54  9.052E+02  0.000E+00  0.000E+00  0.000E+00  4.261E-03  1.278E+00  0.000E+00   0.0E+00
   38   55  8.209E+02  0.000E+00  0.000E+00  0.000E+00  1.493E+01  0.000E+00  0.000E+00   0.0E+00
   38   56  8.073E+02  0.000E+00  0.000E+00  0.000E+00  4.549E+00  4.127E+01  0.000E+00   0.0E+00
   38   57  7.364E+02  0.000E+00  0.000E+00  0.000E+00  1.061E+00  0.000E+00  0.000E+00   0.0E+00
   38   59  5.168E+02  0.000E+00  0.000E+00  0.000E+00  5.353E-01  7.268E+02  0.000E+00   0.0E+00
   38   60  4.990E+02  0.000E+00  0.000E+00  0.000E+00  2.176E+00  0.000E+00  0.000E+00   0.0E+00
   38   61  4.075E+02  7.297E+04  1.363E-06  1.463E-05  0.000E+00  0.000E+00  2.699E-03   3.0E+00
   38   62  3.800E+02  0.000E+00  0.000E+00  0.000E+00  0.000E+00  0.000E+00  3.316E-03   0.0E+00
   38   64  3.327E+02  0.000E+00  0.000E+00  0.000E+00  0.000E+00  0.000E+00  5.831E-03   0.0E+00
   38   66  2.457E+02  0.000E+00  0.000E+00  0.000E+00  3.170E+00  0.000E+00  0.000E+00   0.0E+00
   38   67  2.314E+02  0.000E+00  0.000E+00  0.000E+00  8.847E+00  9.550E-03  0.000E+00   0.0E+00
   38   68  2.309E+02  0.000E+00  0.000E+00  0.000E+00  1.403E+02  8.630E+00  0.000E+00   0.0E+00
   38   69  2.257E+02  0.000E+00  0.000E+00  0.000E+00  2.626E+01  0.000E+00  0.000E+00   0.0E+00
   38   70  2.207E+02  0.000E+00  0.000E+00  0.000E+00  1.485E+00  7.914E+00  0.000E+00   0.0E+00
   38   72  2.153E+02  0.000E+00  0.000E+00  0.000E+00  3.872E+02  0.000E+00  0.000E+00   0.0E+00
   38   73  2.134E+02  0.000E+00  0.000E+00  0.000E+00  1.329E+02  2.034E+00  0.000E+00   0.0E+00
   38   75  2.119E+02  0.000E+00  0.000E+00  0.000E+00  5.265E+02  0.000E+00  0.000E+00   0.0E+00
   38   77  2.048E+02  0.000E+00  0.000E+00  0.000E+00  8.802E-01  0.000E+00  0.000E+00   0.0E+00
   38   78  1.932E+02  0.000E+00  0.000E+00  0.000E+00  0.000E+00  0.000E+00  4.967E-02   0.0E+00
   38   82  1.542E+02  0.000E+00  0.000E+00  0.000E+00  0.000E+00  0.000E+00  2.051E-01   0.0E+00
   38   83  1.530E+02  1.174E+09  5.147E-03  2.073E-02  0.000E+00  0.000E+00  4.894E+00   7.8E-01
   38   84  1.523E+02  9.110E+05  2.376E-06  9.530E-06  0.000E+00  0.000E+00  1.039E+00   3.5E-01
   38   85  1.513E+02  1.004E+10  3.448E-02  1.374E-01  0.000E+00  0.000E+00  4.362E+01   8.5E-01
   38   86  1.493E+02  1.000E+08  2.507E-04  9.859E-04  0.000E+00  0.000E+00  3.127E+01   6.7E-01
   38   87  1.475E+02  0.000E+00  0.000E+00  0.000E+00  0.000E+00  0.000E+00  5.625E+00   0.0E+00
   38   88  1.461E+02  2.415E+09  7.721E-03  2.970E-02  0.000E+00  0.000E+00  1.813E+01   8.0E-01
   38   89  1.446E+02  0.000E+00  0.000E+00  0.000E+00  1.006E+03  0.000E+00  0.000E+00   0.0E+00
   38   91  1.430E+02  0.000E+00  0.000E+00  0.000E+00  2.191E+02  2.812E-01  0.000E+00   0.0E+00
   38   92  1.430E+02  1.573E+10  3.618E-02  1.363E-01  0.000E+00  0.000E+00  2.956E+00   8.2E-01
   38   93  1.427E+02  0.000E+00  0.000E+00  0.000E+00  0.000E+00  0.000E+00  2.480E+01   0.0E+00
   38   94  1.426E+02  4.062E+09  1.237E-02  4.646E-02  0.000E+00  0.000E+00  7.296E+00   7.9E-01
   38   95  1.418E+02  7.210E+09  1.630E-02  6.084E-02  0.000E+00  0.000E+00  7.983E+00   7.9E-01
   38   97  1.399E+02  0.000E+00  0.000E+00  0.000E+00  6.789E+03  0.000E+00  0.000E+00   0.0E+00
   38   98  1.398E+02  0.000E+00  0.000E+00  0.000E+00  0.000E+00  0.000E+00  6.693E+00   0.0E+00
   38   99  1.381E+02  2.859E+09  6.133E-03  2.231E-02  0.000E+00  0.000E+00  8.669E-03   7.7E-01
   38  102  1.314E+02  0.000E+00  0.000E+00  0.000E+00  0.000E+00  0.000E+00  3.997E-01   0.0E+00
   39   40  1.401E+04  0.000E+00  0.000E+00  0.000E+00  2.436E-06  0.000E+00  0.000E+00   0.0E+00
   39   41  1.316E+04  0.000E+00  0.000E+00  0.000E+00  5.067E-06  7.826E+00  0.000E+00   0.0E+00
   39   42  7.216E+03  0.000E+00  0.000E+00  0.000E+00  0.000E+00  8.524E-01  0.000E+00   0.0E+00
   39   43  6.751E+03  0.000E+00  0.000E+00  0.000E+00  4.803E-04  3.017E+00  0.000E+00   0.0E+00
   39   45  5.670E+03  0.000E+00  0.000E+00  0.000E+00  1.787E-03  0.000E+00  0.000E+00   0.0E+00
   39   46  4.166E+03  0.000E+00  0.000E+00  0.000E+00  3.159E-05  2.415E+01  0.000E+00   0.0E+00
   39   47  3.686E+03  0.000E+00  0.000E+00  0.000E+00  9.087E-04  0.000E+00  0.000E+00   0.0E+00
   39   48  2.493E+03  0.000E+00  0.000E+00  0.000E+00  2.719E-05  9.057E+01  0.000E+00   0.0E+00
   39   49  2.188E+03  0.000E+00  0.000E+00  0.000E+00  2.996E-04  0.000E+00  0.000E+00   0.0E+00
   39   52  1.035E+03  0.000E+00  0.000E+00  0.000E+00  0.000E+00  1.837E+02  0.000E+00   0.0E+00
   39   53  1.008E+03  0.000E+00  0.000E+00  0.000E+00  6.588E-02  0.000E+00  0.000E+00   0.0E+00
   39   55  8.752E+02  0.000E+00  0.000E+00  0.000E+00  1.034E+00  1.590E+02  0.000E+00   0.0E+00
   39   56  8.598E+02  0.000E+00  0.000E+00  0.000E+00  1.019E-03  0.000E+00  0.000E+00   0.0E+00
   39   57  7.799E+02  0.000E+00  0.000E+00  0.000E+00  4.429E-05  3.123E+01  0.000E+00   0.0E+00
   39   58  7.807E+02  0.000E+00  0.000E+00  0.000E+00  0.000E+00  7.735E+02  0.000E+00   0.0E+00
   39   59  5.379E+02  0.000E+00  0.000E+00  0.000E+00  1.026E-01  0.000E+00  0.000E+00   0.0E+00
   39   60  5.186E+02  0.000E+00  0.000E+00  0.000E+00  6.050E-01  3.310E+02  0.000E+00   0.0E+00
   39   61  4.205E+02  0.000E+00  0.000E+00  0.000E+00  0.000E+00  0.000E+00  1.284E-03   0.0E+00
   39   62  3.912E+02  4.529E+05  2.078E-05  5.353E-05  0.000E+00  0.000E+00  9.203E-05   4.5E-01
   39   63  3.690E+02  4.098E+05  8.365E-06  2.032E-05  0.000E+00  0.000E+00  0.000E+00   5.4E+00
   39   64  3.413E+02  1.918E+06  6.697E-05  1.505E-04  0.000E+00  0.000E+00  6.008E-03   7.4E+00
   39   65  3.174E+02  1.461E+05  2.206E-06  4.610E-06  0.000E+00  0.000E+00  0.000E+00   9.2E+00
   39   66  2.504E+02  0.000E+00  0.000E+00  0.000E+00  5.975E+00  1.271E+01  0.000E+00   0.0E+00
   39   68  2.350E+02  0.000E+00  0.000E+00  0.000E+00  2.540E+00  0.000E+00  0.000E+00   0.0E+00
   39   69  2.296E+02  0.000E+00  0.000E+00  0.000E+00  6.084E+00  1.849E-02  0.000E+00   0.0E+00
   39   70  2.244E+02  0.000E+00  0.000E+00  0.000E+00  2.153E+01  0.000E+00  0.000E+00   0.0E+00
   39   71  2.243E+02  0.000E+00  0.000E+00  0.000E+00  0.000E+00  5.677E-02  0.000E+00   0.0E+00
   39   72  2.188E+02  0.000E+00  0.000E+00  0.000E+00  8.649E-01  3.499E+00  0.000E+00   0.0E+00
   39   73  2.169E+02  0.000E+00  0.000E+00  0.000E+00  1.654E-01  0.000E+00  0.000E+00   0.0E+00
   39   74  2.156E+02  0.000E+00  0.000E+00  0.000E+00  0.000E+00  2.558E+00  0.000E+00   0.0E+00
   39   75  2.154E+02  0.000E+00  0.000E+00  0.000E+00  2.530E+01  6.961E-02  0.000E+00   0.0E+00
   39   76  2.123E+02  0.000E+00  0.000E+00  0.000E+00  0.000E+00  5.307E+00  0.000E+00   0.0E+00
   39   77  2.080E+02  0.000E+00  0.000E+00  0.000E+00  2.115E+00  1.323E-02  0.000E+00   0.0E+00
   39   78  1.961E+02  7.522E+05  8.672E-06  1.120E-05  0.000E+00  0.000E+00  1.843E-02   8.8E-01
   39   79  1.953E+02  1.271E+06  7.268E-06  9.346E-06  0.000E+00  0.000E+00  0.000E+00   1.0E-01
   39   80  1.924E+02  0.000E+00  0.000E+00  0.000E+00  0.000E+00  5.713E-01  0.000E+00   0.0E+00
   39   81  1.570E+02  2.634E+08  9.737E-04  1.007E-03  0.000E+00  0.000E+00  0.000E+00   1.0E+00
   39   82  1.560E+02  5.420E+09  3.954E-02  4.061E-02  0.000E+00  0.000E+00  3.678E+00   8.9E-01
   39   84  1.541E+02  0.000E+00  0.000E+00  0.000E+00  0.000E+00  0.000E+00  8.669E+00   0.0E+00
   39   86  1.510E+02  0.000E+00  0.000E+00  0.000E+00  0.000E+00  0.000E+00  1.910E+00   0.0E+00
   39   87  1.491E+02  1.992E+06  1.328E-05  1.305E-05  0.000E+00  0.000E+00  4.107E-01   7.9E-01
   39   89  1.461E+02  0.000E+00  0.000E+00  0.000E+00  5.948E+01  1.193E+00  0.000E+00   0.0E+00
   39   90  1.451E+02  3.873E+09  1.222E-02  1.167E-02  0.000E+00  0.000E+00  0.000E+00   7.4E-01
   39   91  1.446E+02  0.000E+00  0.000E+00  0.000E+00  1.506E+02  0.000E+00  0.000E+00   0.0E+00
   39   92  1.446E+02  0.000E+00  0.000E+00  0.000E+00  0.000E+00  0.000E+00  4.109E+00   0.0E+00
   39   93  1.442E+02  1.235E+09  7.705E-03  7.317E-03  0.000E+00  0.000E+00  2.271E+01   6.2E-01
   39   95  1.433E+02  0.000E+00  0.000E+00  0.000E+00  0.000E+00  0.000E+00  9.406E-01   0.0E+00
   39   96  1.421E+02  0.000E+00  0.000E+00  0.000E+00  0.000E+00  4.773E+00  0.000E+00   0.0E+00
   39   97  1.414E+02  0.000E+00  0.000E+00  0.000E+00  1.965E+02  3.673E+00  0.000E+00   0.0E+00
   39   98  1.412E+02  2.652E+08  1.586E-03  1.475E-03  0.000E+00  0.000E+00  3.934E-01   6.3E-01
   39   99  1.396E+02  0.000E+00  0.000E+00  0.000E+00  0.000E+00  0.000E+00  1.630E+00   0.0E+00
   39  100  1.373E+02  0.000E+00  0.000E+00  0.000E+00  0.000E+00  2.596E-02  0.000E+00   0.0E+00
   39  101  1.362E+02  1.035E+08  2.878E-04  2.581E-04  0.000E+00  0.000E+00  0.000E+00   1.9E+00
   39  102  1.327E+02  3.894E+07  2.055E-04  1.795E-04  0.000E+00  0.000E+00  4.307E+00   5.9E-02
   40   41  2.157E+05  0.000E+00  0.000E+00  0.000E+00  9.506E-11  6.104E-04  0.000E+00   0.0E+00
   40   42  1.488E+04  0.000E+00  0.000E+00  0.000E+00  3.662E-06  0.000E+00  0.000E+00   0.0E+00
   40   43  1.303E+04  0.000E+00  0.000E+00  0.000E+00  6.433E-05  1.856E+01  0.000E+00   0.0E+00
   40   44  1.323E+04  0.000E+00  0.000E+00  0.000E+00  1.211E-05  3.513E+00  0.000E+00   0.0E+00
   40   45  9.524E+03  0.000E+00  0.000E+00  0.000E+00  5.299E-05  2.505E+00  0.000E+00   0.0E+00
   40   46  5.928E+03  0.000E+00  0.000E+00  0.000E+00  1.698E-05  6.564E-01  0.000E+00   0.0E+00
   40   47  5.001E+03  0.000E+00  0.000E+00  0.000E+00  9.636E-04  2.270E+01  0.000E+00   0.0E+00
   40   48  3.032E+03  0.000E+00  0.000E+00  0.000E+00  9.368E-05  9.456E+00  0.000E+00   0.0E+00
   40   49  2.592E+03  0.000E+00  0.000E+00  0.000E+00  1.338E-02  3.482E+01  0.000E+00   0.0E+00
   40   50  1.465E+03  0.000E+00  0.000E+00  0.000E+00  1.259E-02  2.017E+02  0.000E+00   0.0E+00
   40   51  1.454E+03  0.000E+00  0.000E+00  0.000E+00  2.127E-02  0.000E+00  0.000E+00   0.0E+00
   40   52  1.117E+03  0.000E+00  0.000E+00  0.000E+00  8.983E-02  0.000E+00  0.000E+00   0.0E+00
   40   53  1.086E+03  0.000E+00  0.000E+00  0.000E+00  5.003E-03  1.005E+02  0.000E+00   0.0E+00
   40   54  1.044E+03  0.000E+00  0.000E+00  0.000E+00  1.380E-01  1.086E+01  0.000E+00   0.0E+00
   40   55  9.335E+02  0.000E+00  0.000E+00  0.000E+00  1.334E-01  2.875E+02  0.000E+00   0.0E+00
   40   56  9.160E+02  0.000E+00  0.000E+00  0.000E+00  4.091E-02  1.044E+01  0.000E+00   0.0E+00
   40   57  8.259E+02  0.000E+00  0.000E+00  0.000E+00  1.371E+00  4.356E+02  0.000E+00   0.0E+00
   40   58  8.268E+02  0.000E+00  0.000E+00  0.000E+00  6.707E+00  0.000E+00  0.000E+00   0.0E+00
   40   59  5.593E+02  0.000E+00  0.000E+00  0.000E+00  8.171E-01  1.006E+02  0.000E+00   0.0E+00
   40   60  5.385E+02  0.000E+00  0.000E+00  0.000E+00  3.497E+00  3.136E+03  0.000E+00   0.0E+00
   40   61  4.335E+02  7.378E+04  2.079E-06  1.780E-05  0.000E+00  0.000E+00  2.444E-03   9.6E+00
   40   62  4.025E+02  3.871E+05  6.267E-06  4.982E-05  0.000E+00  0.000E+00  1.210E-03   3.5E+00
   40   63  3.790E+02  0.000E+00  0.000E+00  0.000E+00  0.000E+00  0.000E+00  9.191E-03   0.0E+00
   40   64  3.498E+02  6.764E+06  8.271E-05  5.715E-04  0.000E+00  0.000E+00  3.745E-03   3.9E+00
   40   65  3.247E+02  0.000E+00  0.000E+00  0.000E+00  0.000E+00  0.000E+00  4.874E-03   0.0E+00
   40   66  2.549E+02  0.000E+00  0.000E+00  0.000E+00  3.343E+00  4.335E-01  0.000E+00   0.0E+00
   40   67  2.396E+02  0.000E+00  0.000E+00  0.000E+00  3.617E-02  2.946E+00  0.000E+00   0.0E+00
   40   68  2.390E+02  0.000E+00  0.000E+00  0.000E+00  5.327E+01  5.507E+00  0.000E+00   0.0E+00
   40   69  2.334E+02  0.000E+00  0.000E+00  0.000E+00  1.689E+02  3.926E-03  0.000E+00   0.0E+00
   40   70  2.281E+02  0.000E+00  0.000E+00  0.000E+00  6.059E-01  1.245E+00  0.000E+00   0.0E+00
   40   71  2.279E+02  0.000E+00  0.000E+00  0.000E+00  9.978E+00  0.000E+00  0.000E+00   0.0E+00
   40   72  2.223E+02  0.000E+00  0.000E+00  0.000E+00  6.980E+01  1.117E-01  0.000E+00   0.0E+00
   40   73  2.203E+02  0.000E+00  0.000E+00  0.000E+00  1.231E+00  1.735E-01  0.000E+00   0.0E+00
   40   74  2.189E+02  0.000E+00  0.000E+00  0.000E+00  6.382E+02  0.000E+00  0.000E+00   0.0E+00
   40   75  2.187E+02  0.000E+00  0.000E+00  0.000E+00  2.204E+02  4.896E+00  0.000E+00   0.0E+00
   40   76  2.156E+02  0.000E+00  0.000E+00  0.000E+00  1.840E+00  0.000E+00  0.000E+00   0.0E+00
   40   77  2.111E+02  0.000E+00  0.000E+00  0.000E+00  1.038E+02  4.698E-01  0.000E+00   0.0E+00
   40   78  1.989E+02  8.347E+06  3.299E-05  1.296E-04  0.000E+00  0.000E+00  9.151E-03   3.3E-01
   40   79  1.981E+02  0.000E+00  0.000E+00  0.000E+00  0.000E+00  0.000E+00  2.801E-02   0.0E+00
   40   80  1.951E+02  0.000E+00  0.000E+00  0.000E+00  3.677E+01  0.000E+00  0.000E+00   0.0E+00
   40   81  1.588E+02  0.000E+00  0.000E+00  0.000E+00  0.000E+00  0.000E+00  5.610E-03   0.0E+00
   40   82  1.577E+02  2.423E+08  6.027E-04  1.878E-03  0.000E+00  0.000E+00  2.868E-01   9.9E-01
   40   83  1.565E+02  0.000E+00  0.000E+00  0.000E+00  0.000E+00  0.000E+00  1.526E+00   0.0E+00
   40   84  1.558E+02  1.071E+09  3.897E-03  1.199E-02  0.000E+00  0.000E+00  2.003E+00   9.3E-01
   40   85  1.548E+02  2.766E+09  1.325E-02  4.051E-02  0.000E+00  0.000E+00  3.111E-01   7.8E-01
   40   86  1.526E+02  1.000E+10  3.494E-02  1.053E-01  0.000E+00  0.000E+00  4.897E+00   8.5E-01
   40   87  1.508E+02  2.081E+08  4.726E-04  1.407E-03  0.000E+00  0.000E+00  2.220E+01   6.6E-01
   40   88  1.492E+02  1.983E+08  8.830E-04  2.603E-03  0.000E+00  0.000E+00  1.163E+01   7.5E-01
   40   89  1.477E+02  0.000E+00  0.000E+00  0.000E+00  1.999E+02  3.012E+00  0.000E+00   0.0E+00
   40   90  1.466E+02  0.000E+00  0.000E+00  0.000E+00  0.000E+00  0.000E+00  7.288E+01   0.0E+00
   40   91  1.461E+02  0.000E+00  0.000E+00  0.000E+00  1.534E+01  8.539E-01  0.000E+00   0.0E+00
   40   92  1.461E+02  2.738E+08  8.759E-04  2.528E-03  0.000E+00  0.000E+00  7.051E+00   8.1E-01
   40   93  1.457E+02  2.104E+10  4.466E-02  1.285E-01  0.000E+00  0.000E+00  2.646E+00   8.2E-01
   40   94  1.456E+02  9.323E+06  3.951E-05  1.136E-04  0.000E+00  0.000E+00  8.985E-01   1.3E+00
   40   95  1.448E+02  6.945E+08  2.183E-03  6.243E-03  0.000E+00  0.000E+00  1.658E-02   7.8E-01
   40   96  1.435E+02  0.000E+00  0.000E+00  0.000E+00  2.964E+02  0.000E+00  0.000E+00   0.0E+00
   40   97  1.428E+02  0.000E+00  0.000E+00  0.000E+00  1.509E+03  2.858E-03  0.000E+00   0.0E+00
   40   98  1.427E+02  3.014E+09  6.133E-03  1.729E-02  0.000E+00  0.000E+00  5.142E-02   7.6E-01
   40   99  1.410E+02  6.513E+08  1.941E-03  5.406E-03  0.000E+00  0.000E+00  2.792E-01   8.0E-01
   40  100  1.386E+02  0.000E+00  0.000E+00  0.000E+00  1.476E+02  0.000E+00  0.000E+00   0.0E+00
   40  101  1.375E+02  0.000E+00  0.000E+00  0.000E+00  0.000E+00  0.000E+00  7.776E+00   0.0E+00
   40  102  1.339E+02  3.045E+08  5.461E-04  1.445E-03  0.000E+00  0.000E+00  1.206E-02   4.8E-01
   41   42  1.598E+04  0.000E+00  0.000E+00  0.000E+00  5.413E-07  2.997E-01  0.000E+00   0.0E+00
   41   43  1.386E+04  0.000E+00  0.000E+00  0.000E+00  2.796E-06  1.770E+00  0.000E+00   0.0E+00
   41   44  1.410E+04  0.000E+00  0.000E+00  0.000E+00  6.124E-07  0.000E+00  0.000E+00   0.0E+00
   41   45  9.963E+03  0.000E+00  0.000E+00  0.000E+00  8.308E-05  7.977E+00  0.000E+00   0.0E+00
   41   46  6.095E+03  0.000E+00  0.000E+00  0.000E+00  3.274E-06  1.939E+01  0.000E+00   0.0E+00
   41   47  5.120E+03  0.000E+00  0.000E+00  0.000E+00  1.601E-03  2.818E+01  0.000E+00   0.0E+00
   41   48  3.075E+03  0.000E+00  0.000E+00  0.000E+00  1.005E-02  7.841E+01  0.000E+00   0.0E+00
   41   49  2.624E+03  0.000E+00  0.000E+00  0.000E+00  6.217E-04  5.696E+00  0.000E+00   0.0E+00
   41   50  1.475E+03  0.000E+00  0.000E+00  0.000E+00  5.129E-03  0.000E+00  0.000E+00   0.0E+00
   41   52  1.123E+03  0.000E+00  0.000E+00  0.000E+00  1.246E-01  5.700E+02  0.000E+00   0.0E+00
   41   53  1.092E+03  0.000E+00  0.000E+00  0.000E+00  5.641E-01  1.719E+02  0.000E+00   0.0E+00
   41   54  1.049E+03  0.000E+00  0.000E+00  0.000E+00  2.320E-01  0.000E+00  0.000E+00   0.0E+00
   41   55  9.376E+02  0.000E+00  0.000E+00  0.000E+00  8.053E-02  3.543E+01  0.000E+00   0.0E+00
   41   56  9.200E+02  0.000E+00  0.000E+00  0.000E+00  1.717E-01  5.944E+01  0.000E+00   0.0E+00
   41   57  8.290E+02  0.000E+00  0.000E+00  0.000E+00  1.133E+00  2.314E+02  0.000E+00   0.0E+00
   41   58  8.300E+02  0.000E+00  0.000E+00  0.000E+00  6.068E-01  2.550E+02  0.000E+00   0.0E+00
   41   59  5.608E+02  0.000E+00  0.000E+00  0.000E+00  3.892E-04  1.898E+02  0.000E+00   0.0E+00
   41   60  5.398E+02  0.000E+00  0.000E+00  0.000E+00  2.175E-01  9.792E+02  0.000E+00   0.0E+00
   41   61  4.344E+02  5.552E+04  2.356E-06  1.347E-05  0.000E+00  0.000E+00  3.907E-03   2.2E+01
   41   62  4.032E+02  2.744E+05  6.687E-06  3.551E-05  0.000E+00  0.000E+00  3.308E-04   1.5E+00
   41   63  3.796E+02  4.770E+05  5.152E-06  2.576E-05  0.000E+00  0.000E+00  1.137E-03   2.1E+01
   41   64  3.504E+02  4.184E+06  7.701E-05  3.553E-04  0.000E+00  0.000E+00  4.082E-03   4.2E+00
   41   65  3.252E+02  2.778E+06  2.202E-05  9.429E-05  0.000E+00  0.000E+00  8.972E-03   4.0E+00
   41   66  2.552E+02  0.000E+00  0.000E+00  0.000E+00  1.090E+01  1.393E+00  0.000E+00   0.0E+00
   41   67  2.398E+02  0.000E+00  0.000E+00  0.000E+00  4.222E+00  0.000E+00  0.000E+00   0.0E+00
   41   68  2.393E+02  0.000E+00  0.000E+00  0.000E+00  4.566E-01  5.773E-01  0.000E+00   0.0E+00
   41   69  2.337E+02  0.000E+00  0.000E+00  0.000E+00  2.627E+01  8.925E-02  0.000E+00   0.0E+00
   41   70  2.283E+02  0.000E+00  0.000E+00  0.000E+00  6.104E+00  6.617E+00  0.000E+00   0.0E+00
   41   71  2.281E+02  0.000E+00  0.000E+00  0.000E+00  2.421E+00  9.370E-02  0.000E+00   0.0E+00
   41   72  2.225E+02  0.000E+00  0.000E+00  0.000E+00  4.193E+00  4.692E+00  0.000E+00   0.0E+00
   41   73  2.205E+02  0.000E+00  0.000E+00  0.000E+00  7.565E+00  1.624E+00  0.000E+00   0.0E+00
   41   74  2.192E+02  0.000E+00  0.000E+00  0.000E+00  1.092E+01  6.216E+00  0.000E+00   0.0E+00
   41   75  2.190E+02  0.000E+00  0.000E+00  0.000E+00  4.256E+01  1.780E-02  0.000E+00   0.0E+00
   41   76  2.158E+02  0.000E+00  0.000E+00  0.000E+00  9.087E+00  3.173E+00  0.000E+00   0.0E+00
   41   77  2.114E+02  0.000E+00  0.000E+00  0.000E+00  4.393E+00  2.436E-01  0.000E+00   0.0E+00
   41   78  1.991E+02  5.254E+06  3.121E-05  8.181E-05  0.000E+00  0.000E+00  1.368E-03   6.7E-01
   41   79  1.982E+02  7.727E+06  2.276E-05  5.943E-05  0.000E+00  0.000E+00  1.574E-01   1.1E-01
   41   80  1.953E+02  0.000E+00  0.000E+00  0.000E+00  5.234E+01  5.057E+00  0.000E+00   0.0E+00
   41   81  1.589E+02  2.139E+09  4.050E-03  8.476E-03  0.000E+00  0.000E+00  7.528E-01   1.0E+00
   41   82  1.579E+02  1.467E+09  5.480E-03  1.139E-02  0.000E+00  0.000E+00  1.259E+01   9.6E-01
   41   84  1.559E+02  4.491E+09  2.455E-02  5.040E-02  0.000E+00  0.000E+00  8.979E+00   8.7E-01
   41   85  1.549E+02  0.000E+00  0.000E+00  0.000E+00  0.000E+00  0.000E+00  8.838E-01   0.0E+00
   41   86  1.528E+02  1.232E+06  6.464E-06  1.300E-05  0.000E+00  0.000E+00  6.913E-01   4.3E-02
   41   87  1.509E+02  1.317E+08  4.493E-04  8.926E-04  0.000E+00  0.000E+00  1.674E+00   7.5E-01
   41   88  1.494E+02  0.000E+00  0.000E+00  0.000E+00  0.000E+00  0.000E+00  1.220E+01   0.0E+00
   41   89  1.478E+02  0.000E+00  0.000E+00  0.000E+00  1.950E+02  2.625E+00  0.000E+00   0.0E+00
   41   90  1.467E+02  4.132E+09  6.663E-03  1.287E-02  0.000E+00  0.000E+00  9.465E+00   7.9E-01
   41   91  1.462E+02  0.000E+00  0.000E+00  0.000E+00  5.638E+01  1.212E+00  0.000E+00   0.0E+00
   41   92  1.462E+02  1.774E+09  8.523E-03  1.641E-02  0.000E+00  0.000E+00  2.135E+01   6.2E-01
   41   93  1.458E+02  2.572E+09  8.201E-03  1.575E-02  0.000E+00  0.000E+00  1.345E+01   7.6E-01
   41   94  1.457E+02  0.000E+00  0.000E+00  0.000E+00  0.000E+00  0.000E+00  3.023E+00   0.0E+00
   41   95  1.449E+02  1.073E+07  5.065E-05  9.664E-05  0.000E+00  0.000E+00  7.288E-01   1.3E+00
   41   96  1.436E+02  0.000E+00  0.000E+00  0.000E+00  2.909E+01  5.707E-01  0.000E+00   0.0E+00
   41   97  1.429E+02  0.000E+00  0.000E+00  0.000E+00  6.504E+02  2.150E+00  0.000E+00   0.0E+00
   41   98  1.428E+02  4.787E+08  1.463E-03  2.750E-03  0.000E+00  0.000E+00  1.413E-01   7.4E-01
   41   99  1.411E+02  1.555E+06  6.960E-06  1.293E-05  0.000E+00  0.000E+00  3.435E+00   9.5E-01
   41  100  1.387E+02  0.000E+00  0.000E+00  0.000E+00  1.938E+01  2.396E-01  0.000E+00   0.0E+00
   41  101  1.376E+02  4.401E+09  6.249E-03  1.133E-02  0.000E+00  0.000E+00  1.382E+01   7.5E-01
   41  102  1.340E+02  1.496E+08  4.030E-04  7.113E-04  0.000E+00  0.000E+00  4.452E-01   5.7E-01
   42   43  1.048E+05  0.000E+00  0.000E+00  0.000E+00  3.617E-12  5.225E-04  0.000E+00   0.0E+00
   42   45  2.647E+04  0.000E+00  0.000E+00  0.000E+00  1.271E-07  0.000E+00  0.000E+00   0.0E+00
   42   46  9.854E+03  0.000E+00  0.000E+00  0.000E+00  4.045E-04  4.118E+00  0.000E+00   0.0E+00
   42   47  7.534E+03  0.000E+00  0.000E+00  0.000E+00  4.862E-04  0.000E+00  0.000E+00   0.0E+00
   42   48  3.808E+03  0.000E+00  0.000E+00  0.000E+00  1.153E-04  9.958E+01  0.000E+00   0.0E+00
   42   49  3.140E+03  0.000E+00  0.000E+00  0.000E+00  8.787E-03  0.000E+00  0.000E+00   0.0E+00
   42   52  1.208E+03  0.000E+00  0.000E+00  0.000E+00  0.000E+00  2.279E+02  0.000E+00   0.0E+00
   42   53  1.172E+03  0.000E+00  0.000E+00  0.000E+00  7.018E-01  0.000E+00  0.000E+00   0.0E+00
   42   55  9.960E+02  0.000E+00  0.000E+00  0.000E+00  1.516E+01  2.142E+01  0.000E+00   0.0E+00
   42   56  9.762E+02  0.000E+00  0.000E+00  0.000E+00  1.091E-02  0.000E+00  0.000E+00   0.0E+00
   42   57  8.744E+02  0.000E+00  0.000E+00  0.000E+00  1.016E-01  1.645E+01  0.000E+00   0.0E+00
   42   58  8.755E+02  0.000E+00  0.000E+00  0.000E+00  0.000E+00  3.270E-01  0.000E+00   0.0E+00
   42   59  5.812E+02  0.000E+00  0.000E+00  0.000E+00  1.496E-01  0.000E+00  0.000E+00   0.0E+00
   42   60  5.587E+02  0.000E+00  0.000E+00  0.000E+00  1.883E-01  1.090E+03  0.000E+00   0.0E+00
   42   61  4.465E+02  0.000E+00  0.000E+00  0.000E+00  0.000E+00  0.000E+00  3.293E-06   0.0E+00
   42   62  4.136E+02  7.966E+04  4.087E-06  1.113E-05  0.000E+00  0.000E+00  1.233E-03   5.2E+00
   42   63  3.889E+02  9.141E+04  2.072E-06  5.305E-06  0.000E+00  0.000E+00  0.000E+00   6.2E+00
   42   64  3.582E+02  1.088E+06  4.187E-05  9.876E-05  0.000E+00  0.000E+00  6.222E-03   8.5E+00
   42   65  3.320E+02  1.482E+05  2.449E-06  5.353E-06  0.000E+00  0.000E+00  0.000E+00   6.4E+01
   42   66  2.594E+02  0.000E+00  0.000E+00  0.000E+00  1.218E+01  3.064E-01  0.000E+00   0.0E+00
   42   68  2.429E+02  0.000E+00  0.000E+00  0.000E+00  5.640E-01  0.000E+00  0.000E+00   0.0E+00
   42   69  2.372E+02  0.000E+00  0.000E+00  0.000E+00  1.783E+01  9.732E-01  0.000E+00   0.0E+00
   42   70  2.316E+02  0.000E+00  0.000E+00  0.000E+00  1.985E-01  0.000E+00  0.000E+00   0.0E+00
   42   71  2.314E+02  0.000E+00  0.000E+00  0.000E+00  0.000E+00  1.508E+00  0.000E+00   0.0E+00
   42   72  2.257E+02  0.000E+00  0.000E+00  0.000E+00  1.508E+01  5.507E+00  0.000E+00   0.0E+00
   42   73  2.236E+02  0.000E+00  0.000E+00  0.000E+00  7.251E-05  0.000E+00  0.000E+00   0.0E+00
   42   74  2.222E+02  0.000E+00  0.000E+00  0.000E+00  0.000E+00  3.347E-01  0.000E+00   0.0E+00
   42   75  2.220E+02  0.000E+00  0.000E+00  0.000E+00  1.011E+00  7.163E-01  0.000E+00   0.0E+00
   42   76  2.188E+02  0.000E+00  0.000E+00  0.000E+00  0.000E+00  2.334E+00  0.000E+00   0.0E+00
   42   77  2.142E+02  0.000E+00  0.000E+00  0.000E+00  1.277E+00  1.281E+01  0.000E+00   0.0E+00
   42   78  2.016E+02  3.673E+06  4.475E-05  5.939E-05  0.000E+00  0.000E+00  4.140E-03   5.6E-02
   42   79  2.007E+02  1.704E+07  1.029E-04  1.361E-04  0.000E+00  0.000E+00  0.000E+00   5.6E-02
   42   80  1.977E+02  0.000E+00  0.000E+00  0.000E+00  0.000E+00  2.909E+00  0.000E+00   0.0E+00
   42   81  1.605E+02  1.355E+09  5.234E-03  5.532E-03  0.000E+00  0.000E+00  0.000E+00   8.0E-01
   42   82  1.594E+02  3.530E+08  2.690E-03  2.824E-03  0.000E+00  0.000E+00  6.392E+00   8.6E-01
   42   84  1.574E+02  0.000E+00  0.000E+00  0.000E+00  0.000E+00  0.000E+00  3.600E+00   0.0E+00
   42   86  1.542E+02  0.000E+00  0.000E+00  0.000E+00  0.000E+00  0.000E+00  3.898E-02   0.0E+00
   42   87  1.523E+02  8.177E+06  5.687E-05  5.703E-05  0.000E+00  0.000E+00  1.022E-01   1.2E+00
   42   89  1.492E+02  0.000E+00  0.000E+00  0.000E+00  1.622E+02  1.948E-01  0.000E+00   0.0E+00
   42   90  1.480E+02  1.569E+07  5.154E-05  5.024E-05  0.000E+00  0.000E+00  0.000E+00   1.3E+00
   42   91  1.475E+02  0.000E+00  0.000E+00  0.000E+00  1.651E+01  0.000E+00  0.000E+00   0.0E+00
   42   92  1.475E+02  0.000E+00  0.000E+00  0.000E+00  0.000E+00  0.000E+00  8.632E+00   0.0E+00
   42   93  1.472E+02  2.734E+08  1.776E-03  1.720E-03  0.000E+00  0.000E+00  8.413E-01   6.6E-01
   42   95  1.462E+02  0.000E+00  0.000E+00  0.000E+00  0.000E+00  0.000E+00  5.743E+00   0.0E+00
   42   96  1.449E+02  0.000E+00  0.000E+00  0.000E+00  0.000E+00  1.538E-02  0.000E+00   0.0E+00
   42   97  1.442E+02  0.000E+00  0.000E+00  0.000E+00  2.290E+03  2.165E-01  0.000E+00   0.0E+00
   42   98  1.441E+02  4.740E+09  2.950E-02  2.798E-02  0.000E+00  0.000E+00  1.117E-02   7.1E-01
   42   99  1.423E+02  0.000E+00  0.000E+00  0.000E+00  0.000E+00  0.000E+00  5.366E+00   0.0E+00
   42  100  1.399E+02  0.000E+00  0.000E+00  0.000E+00  0.000E+00  4.606E+00  0.000E+00   0.0E+00
   42  101  1.388E+02  6.576E+09  1.900E-02  1.737E-02  0.000E+00  0.000E+00  0.000E+00   8.0E-01
   42  102  1.352E+02  3.653E+08  2.001E-03  1.781E-03  0.000E+00  0.000E+00  1.260E-01   7.6E-01
   43   44  8.419E+05  0.000E+00  0.000E+00  0.000E+00  2.428E-15  0.000E+00  0.000E+00   0.0E+00
   43   45  3.541E+04  0.000E+00  0.000E+00  0.000E+00  2.621E-07  2.610E-01  0.000E+00   0.0E+00
   43   46  1.088E+04  0.000E+00  0.000E+00  0.000E+00  1.977E-07  1.600E+00  0.000E+00   0.0E+00
   43   47  8.118E+03  0.000E+00  0.000E+00  0.000E+00  2.283E-07  2.660E+00  0.000E+00   0.0E+00
   43   48  3.952E+03  0.000E+00  0.000E+00  0.000E+00  1.267E-04  1.729E+00  0.000E+00   0.0E+00
   43   49  3.237E+03  0.000E+00  0.000E+00  0.000E+00  2.511E-03  1.403E+00  0.000E+00   0.0E+00
   43   50  1.651E+03  0.000E+00  0.000E+00  0.000E+00  4.203E-03  0.000E+00  0.000E+00   0.0E+00
   43   52  1.222E+03  0.000E+00  0.000E+00  0.000E+00  3.263E-03  1.131E+01  0.000E+00   0.0E+00
   43   53  1.185E+03  0.000E+00  0.000E+00  0.000E+00  1.374E-03  1.400E+02  0.000E+00   0.0E+00
   43   54  1.135E+03  0.000E+00  0.000E+00  0.000E+00  1.702E-02  0.000E+00  0.000E+00   0.0E+00
   43   55  1.006E+03  0.000E+00  0.000E+00  0.000E+00  1.022E-01  8.749E+01  0.000E+00   0.0E+00
   43   56  9.853E+02  0.000E+00  0.000E+00  0.000E+00  3.101E-04  4.002E-01  0.000E+00   0.0E+00
   43   57  8.818E+02  0.000E+00  0.000E+00  0.000E+00  5.581E-02  5.076E+00  0.000E+00   0.0E+00
   43   58  8.828E+02  0.000E+00  0.000E+00  0.000E+00  3.149E-01  2.740E+00  0.000E+00   0.0E+00
   43   59  5.844E+02  0.000E+00  0.000E+00  0.000E+00  2.716E-02  4.126E+02  0.000E+00   0.0E+00
   43   60  5.617E+02  0.000E+00  0.000E+00  0.000E+00  9.490E-04  8.963E+02  0.000E+00   0.0E+00
   43   61  4.484E+02  1.356E+02  6.133E-09  3.621E-08  0.000E+00  0.000E+00  1.238E-06   7.2E+01
   43   62  4.153E+02  4.594E+04  1.188E-06  6.495E-06  0.000E+00  0.000E+00  2.298E-03   1.6E-01
   43   63  3.903E+02  2.132E+05  2.434E-06  1.251E-05  0.000E+00  0.000E+00  9.585E-03   2.7E+00
   43   64  3.595E+02  1.898E+05  3.677E-06  1.741E-05  0.000E+00  0.000E+00  3.661E-04   5.7E+00
   43   65  3.330E+02  7.643E+05  6.353E-06  2.786E-05  0.000E+00  0.000E+00  3.663E-04   3.6E+00
   43   66  2.600E+02  0.000E+00  0.000E+00  0.000E+00  1.073E-02  1.328E-02  0.000E+00   0.0E+00
   43   67  2.441E+02  0.000E+00  0.000E+00  0.000E+00  2.626E-01  0.000E+00  0.000E+00   0.0E+00
   43   68  2.435E+02  0.000E+00  0.000E+00  0.000E+00  4.744E+00  2.640E+00  0.000E+00   0.0E+00
   43   69  2.377E+02  0.000E+00  0.000E+00  0.000E+00  7.822E+01  7.640E+00  0.000E+00   0.0E+00
   43   70  2.321E+02  0.000E+00  0.000E+00  0.000E+00  2.610E+00  8.759E-01  0.000E+00   0.0E+00
   43   71  2.320E+02  0.000E+00  0.000E+00  0.000E+00  3.916E+02  5.764E+00  0.000E+00   0.0E+00
   43   72  2.261E+02  0.000E+00  0.000E+00  0.000E+00  2.401E-01  1.266E-02  0.000E+00   0.0E+00
   43   73  2.241E+02  0.000E+00  0.000E+00  0.000E+00  1.188E-01  5.347E-02  0.000E+00   0.0E+00
   43   74  2.227E+02  0.000E+00  0.000E+00  0.000E+00  5.990E+02  1.948E+00  0.000E+00   0.0E+00
   43   75  2.225E+02  0.000E+00  0.000E+00  0.000E+00  6.816E+01  7.882E-01  0.000E+00   0.0E+00
   43   76  2.192E+02  0.000E+00  0.000E+00  0.000E+00  9.888E+01  7.724E-02  0.000E+00   0.0E+00
   43   77  2.146E+02  0.000E+00  0.000E+00  0.000E+00  7.168E+00  5.582E-02  0.000E+00   0.0E+00
   43   78  2.020E+02  3.324E+05  2.032E-06  5.405E-06  0.000E+00  0.000E+00  6.793E-06   1.3E-01
   43   79  2.011E+02  4.694E+05  1.423E-06  3.769E-06  0.000E+00  0.000E+00  4.513E-03   1.1E+00
   43   80  1.981E+02  0.000E+00  0.000E+00  0.000E+00  3.364E+01  1.999E-01  0.000E+00   0.0E+00
   43   81  1.608E+02  1.871E+07  3.625E-05  7.674E-05  0.000E+00  0.000E+00  9.042E-01   1.0E+00
   43   82  1.597E+02  2.709E+07  1.036E-04  2.177E-04  0.000E+00  0.000E+00  2.168E+00   1.0E+00
   43   84  1.577E+02  6.939E+06  3.880E-05  8.055E-05  0.000E+00  0.000E+00  2.898E+00   1.1E+00
   43   85  1.566E+02  0.000E+00  0.000E+00  0.000E+00  0.000E+00  0.000E+00  9.655E+00   0.0E+00
   43   86  1.544E+02  2.574E+09  1.381E-02  2.809E-02  0.000E+00  0.000E+00  1.390E+01   8.2E-01
   43   87  1.525E+02  1.587E+10  5.535E-02  1.112E-01  0.000E+00  0.000E+00  8.292E+00   8.6E-01
   43   88  1.510E+02  0.000E+00  0.000E+00  0.000E+00  0.000E+00  0.000E+00  1.534E+00   0.0E+00
   43   89  1.494E+02  0.000E+00  0.000E+00  0.000E+00  3.974E+00  3.405E+00  0.000E+00   0.0E+00
   43   90  1.482E+02  2.036E+10  3.354E-02  6.548E-02  0.000E+00  0.000E+00  4.417E+00   8.2E-01
   43   91  1.477E+02  0.000E+00  0.000E+00  0.000E+00  1.124E+01  3.704E-02  0.000E+00   0.0E+00
   43   92  1.477E+02  1.687E+08  8.279E-04  1.611E-03  0.000E+00  0.000E+00  2.155E+00   6.8E-01
   43   93  1.474E+02  4.113E+08  1.339E-03  2.599E-03  0.000E+00  0.000E+00  4.045E+00   7.3E-01
   43   94  1.472E+02  0.000E+00  0.000E+00  0.000E+00  0.000E+00  0.000E+00  5.521E-02   0.0E+00
   43   95  1.464E+02  5.489E+08  2.646E-03  5.102E-03  0.000E+00  0.000E+00  2.500E+00   8.2E-01
   43   96  1.451E+02  0.000E+00  0.000E+00  0.000E+00  1.864E+01  2.358E-01  0.000E+00   0.0E+00
   43   97  1.444E+02  0.000E+00  0.000E+00  0.000E+00  5.547E+01  1.102E-04  0.000E+00   0.0E+00
   43   98  1.443E+02  1.013E+09  3.161E-03  6.006E-03  0.000E+00  0.000E+00  1.904E-01   8.3E-01
   43   99  1.425E+02  6.494E+06  2.967E-05  5.569E-05  0.000E+00  0.000E+00  3.103E-01   6.7E-01
   43  100  1.401E+02  0.000E+00  0.000E+00  0.000E+00  1.013E+03  3.318E-03  0.000E+00   0.0E+00
   43  101  1.390E+02  7.979E+07  1.156E-04  2.116E-04  0.000E+00  0.000E+00  2.030E-02   1.5E+00
   43  102  1.353E+02  5.163E+07  1.418E-04  2.527E-04  0.000E+00  0.000E+00  3.759E-02   1.1E+00
   44   45  3.398E+04  0.000E+00  0.000E+00  0.000E+00  2.320E-08  2.459E-01  0.000E+00   0.0E+00
   44   46  1.074E+04  0.000E+00  0.000E+00  0.000E+00  6.531E-05  0.000E+00  0.000E+00   0.0E+00
   44   47  8.041E+03  0.000E+00  0.000E+00  0.000E+00  1.189E-03  1.885E+01  0.000E+00   0.0E+00
   44   48  3.933E+03  0.000E+00  0.000E+00  0.000E+00  4.447E-03  0.000E+00  0.000E+00   0.0E+00
   44   49  3.224E+03  0.000E+00  0.000E+00  0.000E+00  1.215E-02  6.246E+01  0.000E+00   0.0E+00
   44   50  1.647E+03  0.000E+00  0.000E+00  0.000E+00  8.673E-04  2.994E+01  0.000E+00   0.0E+00
   44   51  1.634E+03  0.000E+00  0.000E+00  0.000E+00  1.393E-02  2.252E+02  0.000E+00   0.0E+00
   44   53  1.183E+03  0.000E+00  0.000E+00  0.000E+00  1.254E+00  9.185E-01  0.000E+00   0.0E+00
   44   54  1.134E+03  0.000E+00  0.000E+00  0.000E+00  2.430E-01  8.070E-01  0.000E+00   0.0E+00
   44   55  1.004E+03  0.000E+00  0.000E+00  0.000E+00  6.580E+00  0.000E+00  0.000E+00   0.0E+00
   44   56  9.842E+02  0.000E+00  0.000E+00  0.000E+00  7.180E+00  8.385E+00  0.000E+00   0.0E+00
   44   57  8.808E+02  0.000E+00  0.000E+00  0.000E+00  1.307E+00  0.000E+00  0.000E+00   0.0E+00
   44   59  5.840E+02  0.000E+00  0.000E+00  0.000E+00  5.848E-02  5.014E+03  0.000E+00   0.0E+00
   44   60  5.613E+02  0.000E+00  0.000E+00  0.000E+00  3.135E-01  0.000E+00  0.000E+00   0.0E+00
   44   61  4.482E+02  1.326E+05  2.995E-06  3.536E-05  0.000E+00  0.000E+00  2.479E-03   8.4E+00
   44   62  4.151E+02  0.000E+00  0.000E+00  0.000E+00  0.000E+00  0.000E+00  1.437E-03   0.0E+00
   44   64  3.593E+02  0.000E+00  0.000E+00  0.000E+00  0.000E+00  0.000E+00  6.479E-03   0.0E+00
   44   66  2.600E+02  0.000E+00  0.000E+00  0.000E+00  4.094E-02  0.000E+00  0.000E+00   0.0E+00
   44   67  2.440E+02  0.000E+00  0.000E+00  0.000E+00  2.741E+00  9.399E+00  0.000E+00   0.0E+00
   44   68  2.434E+02  0.000E+00  0.000E+00  0.000E+00  8.663E+00  1.528E-03  0.000E+00   0.0E+00
   44   69  2.376E+02  0.000E+00  0.000E+00  0.000E+00  2.655E+00  0.000E+00  0.000E+00   0.0E+00
   44   70  2.321E+02  0.000E+00  0.000E+00  0.000E+00  1.860E+02  4.607E-01  0.000E+00   0.0E+00
   44   72  2.261E+02  0.000E+00  0.000E+00  0.000E+00  8.524E-02  0.000E+00  0.000E+00   0.0E+00
   44   73  2.240E+02  0.000E+00  0.000E+00  0.000E+00  2.626E+01  9.107E-01  0.000E+00   0.0E+00
   44   75  2.224E+02  0.000E+00  0.000E+00  0.000E+00  2.815E+02  0.000E+00  0.000E+00   0.0E+00
   44   77  2.146E+02  0.000E+00  0.000E+00  0.000E+00  5.297E+02  0.000E+00  0.000E+00   0.0E+00
   44   78  2.019E+02  0.000E+00  0.000E+00  0.000E+00  0.000E+00  0.000E+00  1.649E-03   0.0E+00
   44   82  1.596E+02  0.000E+00  0.000E+00  0.000E+00  0.000E+00  0.000E+00  7.417E-02   0.0E+00
   44   83  1.584E+02  1.358E+09  6.380E-03  2.661E-02  0.000E+00  0.000E+00  3.697E-01   7.1E-01
   44   84  1.576E+02  2.248E+07  6.282E-05  2.608E-04  0.000E+00  0.000E+00  3.075E-01   1.3E+00
   44   85  1.566E+02  2.888E+09  1.062E-02  4.382E-02  0.000E+00  0.000E+00  8.753E-04   8.9E-01
   44   86  1.544E+02  1.785E+08  4.786E-04  1.946E-03  0.000E+00  0.000E+00  9.560E-02   8.5E-01
   44   87  1.525E+02  0.000E+00  0.000E+00  0.000E+00  0.000E+00  0.000E+00  5.336E+00   0.0E+00
   44   88  1.510E+02  4.110E+09  1.404E-02  5.583E-02  0.000E+00  0.000E+00  9.522E-02   8.2E-01
   44   89  1.494E+02  0.000E+00  0.000E+00  0.000E+00  1.150E+02  0.000E+00  0.000E+00   0.0E+00
   44   91  1.477E+02  0.000E+00  0.000E+00  0.000E+00  9.123E+00  1.421E+00  0.000E+00   0.0E+00
   44   92  1.477E+02  7.128E+09  1.749E-02  6.803E-02  0.000E+00  0.000E+00  4.379E+00   8.4E-01
   44   93  1.474E+02  0.000E+00  0.000E+00  0.000E+00  0.000E+00  0.000E+00  8.575E+00   0.0E+00
   44   94  1.472E+02  8.029E+09  2.609E-02  1.012E-01  0.000E+00  0.000E+00  1.601E+01   8.1E-01
   44   95  1.464E+02  2.404E+09  5.793E-03  2.233E-02  0.000E+00  0.000E+00  1.775E+01   7.6E-01
   44   97  1.444E+02  0.000E+00  0.000E+00  0.000E+00  6.150E+03  0.000E+00  0.000E+00   0.0E+00
   44   98  1.442E+02  0.000E+00  0.000E+00  0.000E+00  0.000E+00  0.000E+00  4.781E+01   0.0E+00
   44   99  1.425E+02  1.518E+10  3.465E-02  1.301E-01  0.000E+00  0.000E+00  2.230E+00   8.1E-01
   44  102  1.353E+02  0.000E+00  0.000E+00  0.000E+00  0.000E+00  0.000E+00  2.260E+01   0.0E+00
   45   46  1.570E+04  0.000E+00  0.000E+00  0.000E+00  2.161E-06  2.534E-04  0.000E+00   0.0E+00
   45   47  1.053E+04  0.000E+00  0.000E+00  0.000E+00  8.154E-07  1.275E+01  0.000E+00   0.0E+00
   45   48  4.448E+03  0.000E+00  0.000E+00  0.000E+00  8.532E-04  2.797E-01  0.000E+00   0.0E+00
   45   49  3.562E+03  0.000E+00  0.000E+00  0.000E+00  7.624E-03  4.240E-02  0.000E+00   0.0E+00
   45   50  1.731E+03  0.000E+00  0.000E+00  0.000E+00  1.162E-03  1.265E+00  0.000E+00   0.0E+00
   45   51  1.717E+03  0.000E+00  0.000E+00  0.000E+00  6.499E-03  0.000E+00  0.000E+00   0.0E+00
   45   52  1.266E+03  0.000E+00  0.000E+00  0.000E+00  1.214E-01  0.000E+00  0.000E+00   0.0E+00
   45   53  1.226E+03  0.000E+00  0.000E+00  0.000E+00  3.292E-02  9.671E+01  0.000E+00   0.0E+00
   45   54  1.173E+03  0.000E+00  0.000E+00  0.000E+00  1.502E-01  7.462E+01  0.000E+00   0.0E+00
   45   55  1.035E+03  0.000E+00  0.000E+00  0.000E+00  1.543E-04  1.964E+02  0.000E+00   0.0E+00
   45   56  1.014E+03  0.000E+00  0.000E+00  0.000E+00  1.156E-01  4.717E+01  0.000E+00   0.0E+00
   45   57  9.043E+02  0.000E+00  0.000E+00  0.000E+00  2.711E+00  1.784E+02  0.000E+00   0.0E+00
   45   58  9.054E+02  0.000E+00  0.000E+00  0.000E+00  2.303E+00  0.000E+00  0.000E+00   0.0E+00
   45   59  5.942E+02  0.000E+00  0.000E+00  0.000E+00  1.306E+00  3.590E+02  0.000E+00   0.0E+00
   45   60  5.708E+02  0.000E+00  0.000E+00  0.000E+00  7.741E-01  5.908E+02  0.000E+00   0.0E+00
   45   61  4.542E+02  9.552E+04  2.954E-06  2.650E-05  0.000E+00  0.000E+00  1.784E-03   1.3E+01
   45   62  4.202E+02  6.007E+04  1.060E-06  8.800E-06  0.000E+00  0.000E+00  1.663E-02   1.6E+02
   45   63  3.946E+02  0.000E+00  0.000E+00  0.000E+00  0.000E+00  0.000E+00  2.388E-03   0.0E+00
   45   64  3.631E+02  5.686E+06  7.494E-05  5.375E-04  0.000E+00  0.000E+00  1.266E-02   3.0E+00
   45   65  3.362E+02  0.000E+00  0.000E+00  0.000E+00  0.000E+00  0.000E+00  1.519E-03   0.0E+00
   45   66  2.620E+02  0.000E+00  0.000E+00  0.000E+00  2.009E+00  3.922E+00  0.000E+00   0.0E+00
   45   67  2.458E+02  0.000E+00  0.000E+00  0.000E+00  4.239E+00  2.350E-02  0.000E+00   0.0E+00
   45   68  2.451E+02  0.000E+00  0.000E+00  0.000E+00  1.952E-02  1.387E+00  0.000E+00   0.0E+00
   45   69  2.393E+02  0.000E+00  0.000E+00  0.000E+00  1.949E+01  7.764E-03  0.000E+00   0.0E+00
   45   70  2.337E+02  0.000E+00  0.000E+00  0.000E+00  2.556E+01  1.945E-01  0.000E+00   0.0E+00
   45   71  2.335E+02  0.000E+00  0.000E+00  0.000E+00  1.025E+00  0.000E+00  0.000E+00   0.0E+00
   45   72  2.276E+02  0.000E+00  0.000E+00  0.000E+00  1.797E+01  1.162E-01  0.000E+00   0.0E+00
   45   73  2.255E+02  0.000E+00  0.000E+00  0.000E+00  1.882E+00  7.316E-01  0.000E+00   0.0E+00
   45   74  2.241E+02  0.000E+00  0.000E+00  0.000E+00  3.730E+02  0.000E+00  0.000E+00   0.0E+00
   45   75  2.239E+02  0.000E+00  0.000E+00  0.000E+00  2.837E+01  7.886E+00  0.000E+00   0.0E+00
   45   76  2.206E+02  0.000E+00  0.000E+00  0.000E+00  1.426E+02  0.000E+00  0.000E+00   0.0E+00
   45   77  2.159E+02  0.000E+00  0.000E+00  0.000E+00  1.698E-01  1.049E+01  0.000E+00   0.0E+00
   45   78  2.031E+02  8.680E+06  3.579E-05  1.436E-04  0.000E+00  0.000E+00  7.303E-02   2.5E-01
   45   79  2.023E+02  0.000E+00  0.000E+00  0.000E+00  0.000E+00  0.000E+00  2.018E-02   0.0E+00
   45   80  1.992E+02  0.000E+00  0.000E+00  0.000E+00  7.016E+00  0.000E+00  0.000E+00   0.0E+00
   45   81  1.615E+02  0.000E+00  0.000E+00  0.000E+00  0.000E+00  0.000E+00  4.497E-03   0.0E+00
   45   82  1.604E+02  6.535E+08  1.680E-03  5.324E-03  0.000E+00  0.000E+00  2.608E+00   1.0E+00
   45   83  1.591E+02  0.000E+00  0.000E+00  0.000E+00  0.000E+00  0.000E+00  1.235E+01   0.0E+00
   45   84  1.584E+02  1.643E+09  6.179E-03  1.933E-02  0.000E+00  0.000E+00  1.290E+01   1.0E+00
   45   85  1.574E+02  1.419E+08  7.024E-04  2.183E-03  0.000E+00  0.000E+00  2.766E+00   8.0E-01
   45   86  1.551E+02  3.209E+09  1.158E-02  3.548E-02  0.000E+00  0.000E+00  3.155E+00   9.1E-01
   45   87  1.532E+02  3.078E+08  7.218E-04  2.184E-03  0.000E+00  0.000E+00  3.726E+00   8.9E-01
   45   88  1.516E+02  2.614E+09  1.201E-02  3.598E-02  0.000E+00  0.000E+00  6.321E+01   7.1E-01
   45   89  1.500E+02  0.000E+00  0.000E+00  0.000E+00  3.793E+01  1.212E-01  0.000E+00   0.0E+00
   45   90  1.489E+02  0.000E+00  0.000E+00  0.000E+00  0.000E+00  0.000E+00  2.150E-02   0.0E+00
   45   91  1.484E+02  0.000E+00  0.000E+00  0.000E+00  4.566E+00  1.175E+01  0.000E+00   0.0E+00
   45   92  1.484E+02  4.487E+09  1.481E-02  4.339E-02  0.000E+00  0.000E+00  3.323E-01   8.3E-01
   45   93  1.480E+02  1.835E+09  4.017E-03  1.174E-02  0.000E+00  0.000E+00  9.117E-05   8.7E-01
   45   94  1.479E+02  1.409E+09  6.158E-03  1.799E-02  0.000E+00  0.000E+00  6.586E+00   7.4E-01
   45   95  1.470E+02  3.109E+09  1.007E-02  2.926E-02  0.000E+00  0.000E+00  1.630E+00   8.3E-01
   45   96  1.457E+02  0.000E+00  0.000E+00  0.000E+00  2.494E+02  0.000E+00  0.000E+00   0.0E+00
   45   97  1.450E+02  0.000E+00  0.000E+00  0.000E+00  1.141E+03  4.600E+00  0.000E+00   0.0E+00
   45   98  1.449E+02  2.987E+09  6.263E-03  1.792E-02  0.000E+00  0.000E+00  4.129E+00   7.9E-01
   45   99  1.431E+02  6.152E+05  1.889E-06  5.340E-06  0.000E+00  0.000E+00  3.047E+00   2.0E-03
   45  100  1.407E+02  0.000E+00  0.000E+00  0.000E+00  1.012E+03  0.000E+00  0.000E+00   0.0E+00
   45  101  1.396E+02  0.000E+00  0.000E+00  0.000E+00  0.000E+00  0.000E+00  2.802E+00   0.0E+00
   45  102  1.359E+02  2.560E+09  4.724E-03  1.268E-02  0.000E+00  0.000E+00  1.985E+00   7.3E-01
   46   47  3.200E+04  0.000E+00  0.000E+00  0.000E+00  6.531E-07  1.031E-01  0.000E+00   0.0E+00
   46   48  6.206E+03  0.000E+00  0.000E+00  0.000E+00  4.019E-04  1.039E+01  0.000E+00   0.0E+00
   46   49  4.608E+03  0.000E+00  0.000E+00  0.000E+00  4.043E-03  6.964E+01  0.000E+00   0.0E+00
   46   50  1.946E+03  0.000E+00  0.000E+00  0.000E+00  3.417E-03  0.000E+00  0.000E+00   0.0E+00
   46   52  1.377E+03  0.000E+00  0.000E+00  0.000E+00  7.813E-01  9.474E+00  0.000E+00   0.0E+00
   46   53  1.330E+03  0.000E+00  0.000E+00  0.000E+00  1.629E+00  8.681E+01  0.000E+00   0.0E+00
   46   54  1.268E+03  0.000E+00  0.000E+00  0.000E+00  1.049E+00  0.000E+00  0.000E+00   0.0E+00
   46   55  1.108E+03  0.000E+00  0.000E+00  0.000E+00  1.709E+00  2.159E+02  0.000E+00   0.0E+00
   46   56  1.084E+03  0.000E+00  0.000E+00  0.000E+00  5.762E-01  4.903E+01  0.000E+00   0.0E+00
   46   57  9.595E+02  0.000E+00  0.000E+00  0.000E+00  3.312E+00  3.770E+01  0.000E+00   0.0E+00
   46   58  9.608E+02  0.000E+00  0.000E+00  0.000E+00  1.029E+01  1.749E+02  0.000E+00   0.0E+00
   46   59  6.176E+02  0.000E+00  0.000E+00  0.000E+00  1.424E-02  4.715E+02  0.000E+00   0.0E+00
   46   60  5.923E+02  0.000E+00  0.000E+00  0.000E+00  1.532E+00  1.475E+03  0.000E+00   0.0E+00
   46   61  4.677E+02  4.552E+01  2.239E-09  1.379E-08  0.000E+00  0.000E+00  2.341E-05   7.5E+02
   46   62  4.318E+02  4.713E+05  1.317E-05  7.489E-05  0.000E+00  0.000E+00  1.014E-03   2.8E+00
   46   63  4.048E+02  7.924E+05  9.734E-06  5.189E-05  0.000E+00  0.000E+00  3.336E-04   2.8E-02
   46   64  3.717E+02  6.606E+06  1.368E-04  6.699E-04  0.000E+00  0.000E+00  1.624E-04   5.9E+00
   46   65  3.435E+02  1.289E+07  1.140E-04  5.158E-04  0.000E+00  0.000E+00  5.538E-03   5.9E+00
   46   66  2.664E+02  0.000E+00  0.000E+00  0.000E+00  1.486E+01  7.300E-02  0.000E+00   0.0E+00
   46   67  2.496E+02  0.000E+00  0.000E+00  0.000E+00  2.791E-02  0.000E+00  0.000E+00   0.0E+00
   46   68  2.490E+02  0.000E+00  0.000E+00  0.000E+00  4.398E+00  1.398E+00  0.000E+00   0.0E+00
   46   69  2.430E+02  0.000E+00  0.000E+00  0.000E+00  8.426E+00  8.602E-01  0.000E+00   0.0E+00
   46   70  2.372E+02  0.000E+00  0.000E+00  0.000E+00  6.700E-01  4.966E+00  0.000E+00   0.0E+00
   46   71  2.370E+02  0.000E+00  0.000E+00  0.000E+00  6.022E+00  1.171E+00  0.000E+00   0.0E+00
   46   72  2.309E+02  0.000E+00  0.000E+00  0.000E+00  4.510E-01  6.810E+00  0.000E+00   0.0E+00
   46   73  2.288E+02  0.000E+00  0.000E+00  0.000E+00  1.226E-03  2.607E+00  0.000E+00   0.0E+00
   46   74  2.273E+02  0.000E+00  0.000E+00  0.000E+00  1.585E+00  2.882E-01  0.000E+00   0.0E+00
   46   75  2.271E+02  0.000E+00  0.000E+00  0.000E+00  9.139E+00  5.525E-01  0.000E+00   0.0E+00
   46   76  2.238E+02  0.000E+00  0.000E+00  0.000E+00  9.665E+01  6.117E-03  0.000E+00   0.0E+00
   46   77  2.189E+02  0.000E+00  0.000E+00  0.000E+00  5.970E+00  2.961E+00  0.000E+00   0.0E+00
   46   78  2.058E+02  1.900E+07  1.206E-04  3.268E-04  0.000E+00  0.000E+00  4.725E-04   1.1E-01
   46   79  2.049E+02  3.607E+07  1.135E-04  3.063E-04  0.000E+00  0.000E+00  4.289E-04   2.1E-01
   46   80  2.017E+02  0.000E+00  0.000E+00  0.000E+00  2.437E+02  7.653E-01  0.000E+00   0.0E+00
   46   81  1.632E+02  2.245E+08  4.481E-04  9.628E-04  0.000E+00  0.000E+00  2.388E+01   6.7E-01
   46   82  1.621E+02  1.313E+09  5.170E-03  1.103E-02  0.000E+00  0.000E+00  5.876E+00   8.2E-01
   46   84  1.600E+02  5.297E+08  3.049E-03  6.424E-03  0.000E+00  0.000E+00  1.957E-02   8.7E-01
   46   85  1.589E+02  0.000E+00  0.000E+00  0.000E+00  0.000E+00  0.000E+00  4.266E-01   0.0E+00
   46   86  1.567E+02  5.402E+07  2.982E-04  6.153E-04  0.000E+00  0.000E+00  8.427E-01   1.0E+00
   46   87  1.547E+02  1.349E+08  4.841E-04  9.861E-04  0.000E+00  0.000E+00  5.998E-02   9.8E-01
   46   88  1.531E+02  0.000E+00  0.000E+00  0.000E+00  0.000E+00  0.000E+00  7.301E-01   0.0E+00
   46   89  1.515E+02  0.000E+00  0.000E+00  0.000E+00  1.811E+02  1.048E+00  0.000E+00   0.0E+00
   46   90  1.503E+02  5.759E+07  9.751E-05  1.930E-04  0.000E+00  0.000E+00  7.615E-01   1.1E+00
   46   91  1.498E+02  0.000E+00  0.000E+00  0.000E+00  1.531E+02  1.677E+00  0.000E+00   0.0E+00
   46   92  1.498E+02  4.399E+07  2.219E-04  4.377E-04  0.000E+00  0.000E+00  1.165E+01   5.1E-01
   46   93  1.494E+02  3.037E+08  1.016E-03  2.000E-03  0.000E+00  0.000E+00  3.307E+00   7.1E-01
   46   94  1.493E+02  0.000E+00  0.000E+00  0.000E+00  0.000E+00  0.000E+00  4.296E+00   0.0E+00
   46   95  1.484E+02  1.786E+09  8.849E-03  1.729E-02  0.000E+00  0.000E+00  1.275E+01   7.3E-01
   46   96  1.471E+02  0.000E+00  0.000E+00  0.000E+00  2.282E-01  2.146E+00  0.000E+00   0.0E+00
   46   97  1.463E+02  0.000E+00  0.000E+00  0.000E+00  2.808E+03  9.155E-01  0.000E+00   0.0E+00
   46   98  1.462E+02  1.453E+09  4.655E-03  8.962E-03  0.000E+00  0.000E+00  2.927E-01   7.3E-01
   46   99  1.444E+02  1.101E+08  5.163E-04  9.819E-04  0.000E+00  0.000E+00  2.767E+00   4.7E-01
   46  100  1.419E+02  0.000E+00  0.000E+00  0.000E+00  3.531E+01  3.623E-01  0.000E+00   0.0E+00
   46  101  1.408E+02  2.959E+10  4.397E-02  8.154E-02  0.000E+00  0.000E+00  8.981E-02   7.2E-01
   46  102  1.370E+02  2.046E+08  5.760E-04  1.039E-03  0.000E+00  0.000E+00  1.237E+00   8.4E-01
   47   48  7.699E+03  0.000E+00  0.000E+00  0.000E+00  8.192E-05  1.509E+00  0.000E+00   0.0E+00
   47   49  5.383E+03  0.000E+00  0.000E+00  0.000E+00  2.147E-03  3.144E+01  0.000E+00   0.0E+00
   47   50  2.072E+03  0.000E+00  0.000E+00  0.000E+00  4.684E-03  1.161E+01  0.000E+00   0.0E+00
   47   51  2.051E+03  0.000E+00  0.000E+00  0.000E+00  1.791E-04  0.000E+00  0.000E+00   0.0E+00
   47   52  1.439E+03  0.000E+00  0.000E+00  0.000E+00  1.794E-02  0.000E+00  0.000E+00   0.0E+00
   47   53  1.388E+03  0.000E+00  0.000E+00  0.000E+00  2.644E-05  3.547E-02  0.000E+00   0.0E+00
   47   54  1.320E+03  0.000E+00  0.000E+00  0.000E+00  4.538E-01  1.503E+02  0.000E+00   0.0E+00
   47   55  1.148E+03  0.000E+00  0.000E+00  0.000E+00  4.705E-02  3.782E+01  0.000E+00   0.0E+00
   47   56  1.122E+03  0.000E+00  0.000E+00  0.000E+00  2.539E-02  1.969E+02  0.000E+00   0.0E+00
   47   57  9.892E+02  0.000E+00  0.000E+00  0.000E+00  8.487E+00  2.577E+01  0.000E+00   0.0E+00
   47   58  9.905E+02  0.000E+00  0.000E+00  0.000E+00  9.958E+00  0.000E+00  0.000E+00   0.0E+00
   47   59  6.298E+02  0.000E+00  0.000E+00  0.000E+00  5.998E-01  3.574E+03  0.000E+00   0.0E+00
   47   60  6.035E+02  0.000E+00  0.000E+00  0.000E+00  9.588E+00  9.426E+01  0.000E+00   0.0E+00
   47   61  4.746E+02  3.322E+04  1.122E-06  1.052E-05  0.000E+00  0.000E+00  1.045E-03   2.2E+01
   47   62  4.377E+02  6.413E+05  1.228E-05  1.062E-04  0.000E+00  0.000E+00  1.636E-03   3.2E-02
   47   63  4.100E+02  0.000E+00  0.000E+00  0.000E+00  0.000E+00  0.000E+00  6.096E-03   0.0E+00
   47   64  3.761E+02  3.026E+06  4.278E-05  3.178E-04  0.000E+00  0.000E+00  7.226E-05   6.2E+00
   47   65  3.472E+02  0.000E+00  0.000E+00  0.000E+00  0.000E+00  0.000E+00  1.704E-02   0.0E+00
   47   66  2.686E+02  0.000E+00  0.000E+00  0.000E+00  7.022E+00  1.400E+00  0.000E+00   0.0E+00
   47   67  2.516E+02  0.000E+00  0.000E+00  0.000E+00  2.879E-01  2.794E-01  0.000E+00   0.0E+00
   47   68  2.510E+02  0.000E+00  0.000E+00  0.000E+00  3.326E+00  2.778E-01  0.000E+00   0.0E+00
   47   69  2.449E+02  0.000E+00  0.000E+00  0.000E+00  4.113E+00  1.157E+00  0.000E+00   0.0E+00
   47   70  2.390E+02  0.000E+00  0.000E+00  0.000E+00  2.398E+01  4.106E+00  0.000E+00   0.0E+00
   47   71  2.388E+02  0.000E+00  0.000E+00  0.000E+00  1.639E+01  0.000E+00  0.000E+00   0.0E+00
   47   72  2.326E+02  0.000E+00  0.000E+00  0.000E+00  1.035E+01  5.695E-01  0.000E+00   0.0E+00
   47   73  2.304E+02  0.000E+00  0.000E+00  0.000E+00  1.714E+01  1.240E+01  0.000E+00   0.0E+00
   47   74  2.290E+02  0.000E+00  0.000E+00  0.000E+00  5.485E+00  0.000E+00  0.000E+00   0.0E+00
   47   75  2.287E+02  0.000E+00  0.000E+00  0.000E+00  1.973E+02  6.174E+00  0.000E+00   0.0E+00
   47   76  2.253E+02  0.000E+00  0.000E+00  0.000E+00  1.759E+02  0.000E+00  0.000E+00   0.0E+00
   47   77  2.204E+02  0.000E+00  0.000E+00  0.000E+00  5.901E-01  1.034E+00  0.000E+00   0.0E+00
   47   78  2.071E+02  7.893E+06  3.384E-05  1.384E-04  0.000E+00  0.000E+00  6.601E-03   1.1E-01
   47   79  2.062E+02  0.000E+00  0.000E+00  0.000E+00  0.000E+00  0.000E+00  1.673E-01   0.0E+00
   47   80  2.030E+02  0.000E+00  0.000E+00  0.000E+00  4.587E+00  0.000E+00  0.000E+00   0.0E+00
   47   81  1.640E+02  0.000E+00  0.000E+00  0.000E+00  0.000E+00  0.000E+00  1.635E+00   0.0E+00
   47   82  1.629E+02  1.458E+07  3.865E-05  1.244E-04  0.000E+00  0.000E+00  2.083E+00   2.2E+00
   47   83  1.615E+02  0.000E+00  0.000E+00  0.000E+00  0.000E+00  0.000E+00  2.536E-01   0.0E+00
   47   84  1.608E+02  2.512E+09  9.735E-03  3.092E-02  0.000E+00  0.000E+00  3.905E-01   9.0E-01
   47   85  1.597E+02  3.619E+08  1.846E-03  5.823E-03  0.000E+00  0.000E+00  1.043E+00   8.2E-01
   47   86  1.574E+02  6.266E+07  2.329E-04  7.242E-04  0.000E+00  0.000E+00  5.394E-01   7.5E-01
   47   87  1.554E+02  5.524E+08  1.334E-03  4.096E-03  0.000E+00  0.000E+00  3.853E-02   7.7E-01
   47   88  1.538E+02  1.262E+09  5.972E-03  1.815E-02  0.000E+00  0.000E+00  5.814E-01   7.3E-01
   47   89  1.522E+02  0.000E+00  0.000E+00  0.000E+00  5.259E+00  1.703E+00  0.000E+00   0.0E+00
   47   90  1.510E+02  0.000E+00  0.000E+00  0.000E+00  0.000E+00  0.000E+00  1.610E+00   0.0E+00
   47   91  1.505E+02  0.000E+00  0.000E+00  0.000E+00  5.904E+01  7.056E-01  0.000E+00   0.0E+00
   47   92  1.505E+02  1.988E+07  6.751E-05  2.006E-04  0.000E+00  0.000E+00  1.057E+01   8.7E-01
   47   93  1.501E+02  1.619E+09  3.645E-03  1.081E-02  0.000E+00  0.000E+00  5.014E+00   8.6E-01
   47   94  1.500E+02  2.534E+08  1.139E-03  3.375E-03  0.000E+00  0.000E+00  3.883E+01   5.9E-01
   47   95  1.491E+02  8.651E+09  2.884E-02  8.493E-02  0.000E+00  0.000E+00  2.067E+00   7.9E-01
   47   96  1.478E+02  0.000E+00  0.000E+00  0.000E+00  2.326E+03  0.000E+00  0.000E+00   0.0E+00
   47   97  1.470E+02  0.000E+00  0.000E+00  0.000E+00  2.372E+03  1.618E+00  0.000E+00   0.0E+00
   47   98  1.469E+02  1.437E+10  3.098E-02  8.987E-02  0.000E+00  0.000E+00  2.784E+00   7.8E-01
   47   99  1.451E+02  4.581E+09  1.445E-02  4.142E-02  0.000E+00  0.000E+00  1.774E-02   8.4E-01
   47  100  1.426E+02  0.000E+00  0.000E+00  0.000E+00  3.559E+01  0.000E+00  0.000E+00   0.0E+00
   47  101  1.414E+02  0.000E+00  0.000E+00  0.000E+00  0.000E+00  0.000E+00  3.379E-04   0.0E+00
   47  102  1.376E+02  4.136E+08  7.831E-04  2.129E-03  0.000E+00  0.000E+00  7.957E+00   5.8E-01
   48   49  1.789E+04  0.000E+00  0.000E+00  0.000E+00  1.369E-05  2.506E-01  0.000E+00   0.0E+00
   48   50  2.835E+03  0.000E+00  0.000E+00  0.000E+00  7.320E-04  0.000E+00  0.000E+00   0.0E+00
   48   52  1.770E+03  0.000E+00  0.000E+00  0.000E+00  4.884E-03  5.481E+01  0.000E+00   0.0E+00
   48   53  1.692E+03  0.000E+00  0.000E+00  0.000E+00  5.707E-01  1.780E+01  0.000E+00   0.0E+00
   48   54  1.593E+03  0.000E+00  0.000E+00  0.000E+00  3.080E-01  0.000E+00  0.000E+00   0.0E+00
   48   55  1.349E+03  0.000E+00  0.000E+00  0.000E+00  4.769E+00  6.722E+01  0.000E+00   0.0E+00
   48   56  1.313E+03  0.000E+00  0.000E+00  0.000E+00  1.307E-01  1.505E-01  0.000E+00   0.0E+00
   48   57  1.135E+03  0.000E+00  0.000E+00  0.000E+00  2.415E+00  2.598E+01  0.000E+00   0.0E+00
   48   58  1.137E+03  0.000E+00  0.000E+00  0.000E+00  1.605E+01  1.543E-03  0.000E+00   0.0E+00
   48   59  6.859E+02  0.000E+00  0.000E+00  0.000E+00  1.509E+00  9.080E+02  0.000E+00   0.0E+00
   48   60  6.548E+02  0.000E+00  0.000E+00  0.000E+00  4.962E+00  5.571E+02  0.000E+00   0.0E+00
   48   61  5.058E+02  2.756E+03  1.586E-07  1.056E-06  0.000E+00  0.000E+00  2.140E-04   1.5E+01
   48   62  4.640E+02  1.776E+03  5.732E-08  3.503E-07  0.000E+00  0.000E+00  1.219E-03   1.4E+02
   48   63  4.331E+02  2.346E+05  3.297E-06  1.880E-05  0.000E+00  0.000E+00  1.342E-03   3.8E+00
   48   64  3.954E+02  2.121E+05  4.972E-06  2.589E-05  0.000E+00  0.000E+00  1.314E-02   2.4E+01
   48   65  3.636E+02  6.806E+06  6.747E-05  3.231E-04  0.000E+00  0.000E+00  2.255E-02   9.0E+00
   48   66  2.784E+02  0.000E+00  0.000E+00  0.000E+00  8.676E-03  2.720E+00  0.000E+00   0.0E+00
   48   67  2.601E+02  0.000E+00  0.000E+00  0.000E+00  1.400E-01  0.000E+00  0.000E+00   0.0E+00
   48   68  2.594E+02  0.000E+00  0.000E+00  0.000E+00  8.572E-01  1.442E-02  0.000E+00   0.0E+00
   48   69  2.529E+02  0.000E+00  0.000E+00  0.000E+00  1.865E+00  2.850E+00  0.000E+00   0.0E+00
   48   70  2.466E+02  0.000E+00  0.000E+00  0.000E+00  5.157E-01  1.775E-01  0.000E+00   0.0E+00
   48   71  2.464E+02  0.000E+00  0.000E+00  0.000E+00  1.843E-01  8.146E-01  0.000E+00   0.0E+00
   48   72  2.399E+02  0.000E+00  0.000E+00  0.000E+00  1.875E+01  7.424E-01  0.000E+00   0.0E+00
   48   73  2.375E+02  0.000E+00  0.000E+00  0.000E+00  1.760E+00  5.369E+00  0.000E+00   0.0E+00
   48   74  2.360E+02  0.000E+00  0.000E+00  0.000E+00  9.000E-01  3.154E+00  0.000E+00   0.0E+00
   48   75  2.358E+02  0.000E+00  0.000E+00  0.000E+00  2.496E+00  3.089E-02  0.000E+00   0.0E+00
   48   76  2.321E+02  0.000E+00  0.000E+00  0.000E+00  1.094E+01  1.857E+01  0.000E+00   0.0E+00
   48   77  2.269E+02  0.000E+00  0.000E+00  0.000E+00  6.428E+00  5.155E+00  0.000E+00   0.0E+00
   48   78  2.128E+02  9.988E+06  6.783E-05  1.901E-04  0.000E+00  0.000E+00  3.727E-03   2.7E-02
   48   79  2.119E+02  4.437E+07  1.493E-04  4.168E-04  0.000E+00  0.000E+00  3.784E-02   1.5E-01
   48   80  2.085E+02  0.000E+00  0.000E+00  0.000E+00  5.075E+01  4.266E-02  0.000E+00   0.0E+00
   48   81  1.676E+02  1.458E+08  3.070E-04  6.775E-04  0.000E+00  0.000E+00  2.599E+00   9.7E-01
   48   82  1.664E+02  7.167E+06  2.975E-05  6.519E-05  0.000E+00  0.000E+00  5.374E+00   1.4E+00
   48   84  1.642E+02  2.025E+08  1.228E-03  2.656E-03  0.000E+00  0.000E+00  9.029E+00   7.3E-01
   48   85  1.631E+02  0.000E+00  0.000E+00  0.000E+00  0.000E+00  0.000E+00  6.774E-01   0.0E+00
   48   86  1.607E+02  1.210E+08  7.027E-04  1.488E-03  0.000E+00  0.000E+00  5.323E-03   6.7E-01
   48   87  1.586E+02  1.499E+08  5.657E-04  1.182E-03  0.000E+00  0.000E+00  3.628E-02   7.4E-01
   48   88  1.570E+02  0.000E+00  0.000E+00  0.000E+00  0.000E+00  0.000E+00  4.519E+00   0.0E+00
   48   89  1.552E+02  0.000E+00  0.000E+00  0.000E+00  2.689E+02  2.118E-01  0.000E+00   0.0E+00
   48   90  1.540E+02  1.057E+07  1.880E-05  3.813E-05  0.000E+00  0.000E+00  9.146E-02   1.9E-01
   48   91  1.535E+02  0.000E+00  0.000E+00  0.000E+00  6.074E+01  2.008E+00  0.000E+00   0.0E+00
   48   92  1.535E+02  1.757E+07  9.309E-05  1.882E-04  0.000E+00  0.000E+00  4.190E+00   6.5E-01
   48   93  1.531E+02  2.255E+08  7.922E-04  1.597E-03  0.000E+00  0.000E+00  7.832E-02   8.7E-01
   48   94  1.529E+02  0.000E+00  0.000E+00  0.000E+00  0.000E+00  0.000E+00  1.895E+00   0.0E+00
   48   95  1.521E+02  1.038E+09  5.398E-03  1.081E-02  0.000E+00  0.000E+00  7.689E+00   7.5E-01
   48   96  1.506E+02  0.000E+00  0.000E+00  0.000E+00  3.017E+03  4.546E-02  0.000E+00   0.0E+00
   48   97  1.499E+02  0.000E+00  0.000E+00  0.000E+00  4.919E+02  7.419E-01  0.000E+00   0.0E+00
   48   98  1.497E+02  3.038E+08  1.021E-03  2.014E-03  0.000E+00  0.000E+00  1.565E+00   6.0E-01
   48   99  1.479E+02  2.818E+09  1.386E-02  2.698E-02  0.000E+00  0.000E+00  1.925E+01   7.1E-01
   48  100  1.453E+02  0.000E+00  0.000E+00  0.000E+00  3.126E+02  1.825E+00  0.000E+00   0.0E+00
   48  101  1.441E+02  5.272E+08  8.203E-04  1.556E-03  0.000E+00  0.000E+00  8.697E-02   7.2E-01
   48  102  1.401E+02  1.111E+10  3.272E-02  6.038E-02  0.000E+00  0.000E+00  7.676E-01   7.9E-01
   49   50  3.368E+03  0.000E+00  0.000E+00  0.000E+00  1.823E-03  4.219E+00  0.000E+00   0.0E+00
   49   51  3.313E+03  0.000E+00  0.000E+00  0.000E+00  4.294E-03  0.000E+00  0.000E+00   0.0E+00
   49   52  1.964E+03  0.000E+00  0.000E+00  0.000E+00  3.609E-01  0.000E+00  0.000E+00   0.0E+00
   49   53  1.869E+03  0.000E+00  0.000E+00  0.000E+00  9.631E-03  8.891E+01  0.000E+00   0.0E+00
   49   54  1.748E+03  0.000E+00  0.000E+00  0.000E+00  6.566E-01  3.238E+01  0.000E+00   0.0E+00
   49   55  1.459E+03  0.000E+00  0.000E+00  0.000E+00  5.148E-01  1.309E+01  0.000E+00   0.0E+00
   49   56  1.417E+03  0.000E+00  0.000E+00  0.000E+00  3.120E+00  1.149E+01  0.000E+00   0.0E+00
   49   57  1.212E+03  0.000E+00  0.000E+00  0.000E+00  4.300E-01  1.410E+01  0.000E+00   0.0E+00
   49   58  1.214E+03  0.000E+00  0.000E+00  0.000E+00  4.393E-01  0.000E+00  0.000E+00   0.0E+00
   49   59  7.132E+02  0.000E+00  0.000E+00  0.000E+00  8.526E-01  8.317E+01  0.000E+00   0.0E+00
   49   60  6.797E+02  0.000E+00  0.000E+00  0.000E+00  1.375E+00  1.948E+03  0.000E+00   0.0E+00
   49   61  5.205E+02  2.982E+03  1.212E-07  1.246E-06  0.000E+00  0.000E+00  1.644E-05   2.1E-02
   49   62  4.764E+02  1.766E+06  4.007E-05  3.771E-04  0.000E+00  0.000E+00  1.825E-04   2.8E+00
   49   63  4.438E+02  0.000E+00  0.000E+00  0.000E+00  0.000E+00  0.000E+00  8.035E-04   0.0E+00
   49   64  4.044E+02  2.929E+07  4.787E-04  3.823E-03  0.000E+00  0.000E+00  2.617E-03   4.7E+00
   49   65  3.712E+02  0.000E+00  0.000E+00  0.000E+00  0.000E+00  0.000E+00  4.112E-02   0.0E+00
   49   66  2.828E+02  0.000E+00  0.000E+00  0.000E+00  2.527E+00  1.548E-01  0.000E+00   0.0E+00
   49   67  2.640E+02  0.000E+00  0.000E+00  0.000E+00  2.260E-02  2.579E+00  0.000E+00   0.0E+00
   49   68  2.633E+02  0.000E+00  0.000E+00  0.000E+00  4.277E+00  1.100E-01  0.000E+00   0.0E+00
   49   69  2.565E+02  0.000E+00  0.000E+00  0.000E+00  4.613E+00  9.447E-01  0.000E+00   0.0E+00
   49   70  2.501E+02  0.000E+00  0.000E+00  0.000E+00  2.408E-01  1.340E+00  0.000E+00   0.0E+00
   49   71  2.499E+02  0.000E+00  0.000E+00  0.000E+00  1.760E-01  0.000E+00  0.000E+00   0.0E+00
   49   72  2.431E+02  0.000E+00  0.000E+00  0.000E+00  4.635E+00  1.430E+00  0.000E+00   0.0E+00
   49   73  2.407E+02  0.000E+00  0.000E+00  0.000E+00  3.553E+00  1.742E-01  0.000E+00   0.0E+00
   49   74  2.391E+02  0.000E+00  0.000E+00  0.000E+00  4.514E+00  0.000E+00  0.000E+00   0.0E+00
   49   75  2.389E+02  0.000E+00  0.000E+00  0.000E+00  2.625E+01  3.887E+00  0.000E+00   0.0E+00
   49   76  2.352E+02  0.000E+00  0.000E+00  0.000E+00  6.179E+00  0.000E+00  0.000E+00   0.0E+00
   49   77  2.299E+02  0.000E+00  0.000E+00  0.000E+00  6.443E+01  5.531E+00  0.000E+00   0.0E+00
   49   78  2.154E+02  5.660E+07  2.625E-04  1.117E-03  0.000E+00  0.000E+00  4.056E-04   1.3E-01
   49   79  2.144E+02  0.000E+00  0.000E+00  0.000E+00  0.000E+00  0.000E+00  1.184E-02   0.0E+00
   49   80  2.110E+02  0.000E+00  0.000E+00  0.000E+00  1.008E+03  0.000E+00  0.000E+00   0.0E+00
   49   81  1.692E+02  0.000E+00  0.000E+00  0.000E+00  0.000E+00  0.000E+00  1.080E+00   0.0E+00
   49   82  1.680E+02  1.195E+08  3.370E-04  1.118E-03  0.000E+00  0.000E+00  2.644E+00   7.5E-01
   49   83  1.665E+02  0.000E+00  0.000E+00  0.000E+00  0.000E+00  0.000E+00  2.496E-03   0.0E+00
   49   84  1.658E+02  3.870E+08  1.594E-03  5.218E-03  0.000E+00  0.000E+00  7.886E-01   8.1E-01
   49   85  1.646E+02  3.460E+07  1.874E-04  6.094E-04  0.000E+00  0.000E+00  1.008E+00   9.2E-01
   49   86  1.622E+02  4.176E+07  1.647E-04  5.276E-04  0.000E+00  0.000E+00  1.465E+00   8.2E-01
   49   87  1.601E+02  7.093E+07  1.816E-04  5.743E-04  0.000E+00  0.000E+00  8.796E-01   7.7E-01
   49   88  1.584E+02  3.396E+08  1.703E-03  5.326E-03  0.000E+00  0.000E+00  3.932E-01   7.6E-01
   49   89  1.566E+02  0.000E+00  0.000E+00  0.000E+00  4.670E-01  2.515E+00  0.000E+00   0.0E+00
   49   90  1.554E+02  0.000E+00  0.000E+00  0.000E+00  0.000E+00  0.000E+00  1.609E-01   0.0E+00
   49   91  1.548E+02  0.000E+00  0.000E+00  0.000E+00  3.391E+02  5.816E-01  0.000E+00   0.0E+00
   49   92  1.548E+02  6.568E+08  2.360E-03  7.215E-03  0.000E+00  0.000E+00  5.731E-01   8.1E-01
   49   93  1.544E+02  3.674E+07  8.756E-05  2.671E-04  0.000E+00  0.000E+00  2.573E-02   5.2E-01
   49   94  1.543E+02  1.885E+09  8.966E-03  2.732E-02  0.000E+00  0.000E+00  9.617E+00   7.6E-01
   49   95  1.534E+02  5.664E+08  1.997E-03  6.049E-03  0.000E+00  0.000E+00  1.712E+01   7.9E-01
   49   96  1.519E+02  0.000E+00  0.000E+00  0.000E+00  3.796E+03  0.000E+00  0.000E+00   0.0E+00
   49   97  1.511E+02  0.000E+00  0.000E+00  0.000E+00  8.101E+02  6.207E-01  0.000E+00   0.0E+00
   49   98  1.510E+02  1.082E+09  2.466E-03  7.354E-03  0.000E+00  0.000E+00  1.714E+01   9.2E-01
   49   99  1.491E+02  1.896E+09  6.319E-03  1.861E-02  0.000E+00  0.000E+00  1.737E+01   8.1E-01
   49  100  1.464E+02  0.000E+00  0.000E+00  0.000E+00  2.215E+03  0.000E+00  0.000E+00   0.0E+00
   49  101  1.452E+02  0.000E+00  0.000E+00  0.000E+00  0.000E+00  0.000E+00  1.127E+01   0.0E+00
   49  102  1.412E+02  2.826E+10  5.635E-02  1.572E-01  0.000E+00  0.000E+00  4.188E-01   7.0E-01
   50   51  2.026E+05  0.000E+00  0.000E+00  0.000E+00  1.696E-11  1.389E-03  0.000E+00   0.0E+00
   50   53  4.200E+03  0.000E+00  0.000E+00  0.000E+00  5.352E-02  1.465E+00  0.000E+00   0.0E+00
   50   54  3.635E+03  0.000E+00  0.000E+00  0.000E+00  1.557E-02  2.123E+00  0.000E+00   0.0E+00
   50   55  2.573E+03  0.000E+00  0.000E+00  0.000E+00  7.684E-03  0.000E+00  0.000E+00   0.0E+00
   50   56  2.445E+03  0.000E+00  0.000E+00  0.000E+00  1.521E-01  2.282E-01  0.000E+00   0.0E+00
   50   57  1.893E+03  0.000E+00  0.000E+00  0.000E+00  4.363E-01  0.000E+00  0.000E+00   0.0E+00
   50   59  9.048E+02  0.000E+00  0.000E+00  0.000E+00  9.846E-01  7.069E-01  0.000E+00   0.0E+00
   50   60  8.515E+02  0.000E+00  0.000E+00  0.000E+00  1.860E+01  0.000E+00  0.000E+00   0.0E+00
   50   61  6.157E+02  4.321E+01  1.842E-09  2.986E-08  0.000E+00  0.000E+00  4.395E-06   4.7E+01
   50   62  5.549E+02  0.000E+00  0.000E+00  0.000E+00  0.000E+00  0.000E+00  1.493E-05   0.0E+00
   50   64  4.595E+02  0.000E+00  0.000E+00  0.000E+00  0.000E+00  0.000E+00  2.377E-05   0.0E+00
   50   66  3.087E+02  0.000E+00  0.000E+00  0.000E+00  1.249E-01  0.000E+00  0.000E+00   0.0E+00
   50   67  2.864E+02  0.000E+00  0.000E+00  0.000E+00  3.636E-01  2.782E-01  0.000E+00   0.0E+00
   50   68  2.856E+02  0.000E+00  0.000E+00  0.000E+00  7.892E+00  3.831E-01  0.000E+00   0.0E+00
   50   69  2.777E+02  0.000E+00  0.000E+00  0.000E+00  8.735E+00  0.000E+00  0.000E+00   0.0E+00
   50   70  2.701E+02  0.000E+00  0.000E+00  0.000E+00  8.150E+00  9.103E-02  0.000E+00   0.0E+00
   50   72  2.621E+02  0.000E+00  0.000E+00  0.000E+00  1.711E+00  0.000E+00  0.000E+00   0.0E+00
   50   73  2.593E+02  0.000E+00  0.000E+00  0.000E+00  9.069E+00  6.942E-03  0.000E+00   0.0E+00
   50   75  2.571E+02  0.000E+00  0.000E+00  0.000E+00  1.285E+01  0.000E+00  0.000E+00   0.0E+00
   50   77  2.467E+02  0.000E+00  0.000E+00  0.000E+00  4.023E+01  0.000E+00  0.000E+00   0.0E+00
   50   78  2.301E+02  0.000E+00  0.000E+00  0.000E+00  0.000E+00  0.000E+00  2.264E-05   0.0E+00
   50   82  1.768E+02  0.000E+00  0.000E+00  0.000E+00  0.000E+00  0.000E+00  2.525E-02   0.0E+00
   50   83  1.752E+02  8.325E+06  4.788E-05  2.209E-04  0.000E+00  0.000E+00  1.823E-01   8.7E-01
   50   84  1.743E+02  7.426E+06  2.537E-05  1.165E-04  0.000E+00  0.000E+00  3.992E-01   7.6E-01
   50   85  1.731E+02  2.467E+08  1.108E-03  5.049E-03  0.000E+00  0.000E+00  4.109E+00   7.7E-01
   50   86  1.704E+02  8.343E+07  2.724E-04  1.222E-03  0.000E+00  0.000E+00  1.709E+01   4.8E-01
   50   87  1.681E+02  0.000E+00  0.000E+00  0.000E+00  0.000E+00  0.000E+00  3.703E+01   0.0E+00
   50   88  1.662E+02  2.101E+08  8.700E-04  3.808E-03  0.000E+00  0.000E+00  1.476E+00   7.8E-01
   50   89  1.642E+02  0.000E+00  0.000E+00  0.000E+00  1.105E+04  0.000E+00  0.000E+00   0.0E+00
   50   91  1.623E+02  0.000E+00  0.000E+00  0.000E+00  1.212E+03  4.121E-03  0.000E+00   0.0E+00
   50   92  1.623E+02  1.740E+07  5.153E-05  2.202E-04  0.000E+00  0.000E+00  6.006E+00   1.9E+00
   50   93  1.618E+02  0.000E+00  0.000E+00  0.000E+00  0.000E+00  0.000E+00  1.341E+01   0.0E+00
   50   94  1.617E+02  2.879E+08  1.128E-03  4.804E-03  0.000E+00  0.000E+00  5.404E-02   8.4E-01
   50   95  1.607E+02  3.185E+08  9.245E-04  3.912E-03  0.000E+00  0.000E+00  1.318E+00   1.0E+00
   50   97  1.582E+02  0.000E+00  0.000E+00  0.000E+00  9.751E+00  0.000E+00  0.000E+00   0.0E+00
   50   98  1.581E+02  0.000E+00  0.000E+00  0.000E+00  0.000E+00  0.000E+00  7.810E+00   0.0E+00
   50   99  1.560E+02  1.482E+07  4.055E-05  1.666E-04  0.000E+00  0.000E+00  1.696E+00   1.4E+00
   50  102  1.474E+02  0.000E+00  0.000E+00  0.000E+00  0.000E+00  0.000E+00  1.276E+00   0.0E+00
   51   53  4.289E+03  0.000E+00  0.000E+00  0.000E+00  1.407E-03  0.000E+00  0.000E+00   0.0E+00
   51   54  3.702E+03  0.000E+00  0.000E+00  0.000E+00  1.153E-01  3.363E-01  0.000E+00   0.0E+00
   51   56  2.474E+03  0.000E+00  0.000E+00  0.000E+00  8.832E-02  0.000E+00  0.000E+00   0.0E+00
   51   59  9.088E+02  0.000E+00  0.000E+00  0.000E+00  1.584E+01  0.000E+00  0.000E+00   0.0E+00
   51   61  6.176E+02  0.000E+00  0.000E+00  0.000E+00  0.000E+00  0.000E+00  7.590E-05   0.0E+00
   51   67  2.868E+02  0.000E+00  0.000E+00  0.000E+00  3.084E+00  2.987E-01  0.000E+00   0.0E+00
   51   68  2.860E+02  0.000E+00  0.000E+00  0.000E+00  9.250E+00  0.000E+00  0.000E+00   0.0E+00
   51   70  2.705E+02  0.000E+00  0.000E+00  0.000E+00  2.848E+00  0.000E+00  0.000E+00   0.0E+00
   51   73  2.596E+02  0.000E+00  0.000E+00  0.000E+00  2.228E+01  0.000E+00  0.000E+00   0.0E+00
   51   83  1.753E+02  4.669E+08  2.152E-03  1.242E-02  0.000E+00  0.000E+00  3.856E+00   8.0E-01
   51   84  1.745E+02  0.000E+00  0.000E+00  0.000E+00  0.000E+00  0.000E+00  1.254E-01   0.0E+00
   51   85  1.732E+02  3.187E+07  1.147E-04  6.540E-04  0.000E+00  0.000E+00  6.959E+00   4.3E-01
   51   86  1.705E+02  0.000E+00  0.000E+00  0.000E+00  0.000E+00  0.000E+00  4.515E+00   0.0E+00
   51   88  1.663E+02  1.635E+08  5.426E-04  2.971E-03  0.000E+00  0.000E+00  9.812E-01   7.8E-01
   51   91  1.624E+02  0.000E+00  0.000E+00  0.000E+00  1.221E+04  0.000E+00  0.000E+00   0.0E+00
   51   92  1.624E+02  0.000E+00  0.000E+00  0.000E+00  0.000E+00  0.000E+00  1.857E-01   0.0E+00
   51   94  1.618E+02  4.446E+07  1.396E-04  7.436E-04  0.000E+00  0.000E+00  1.848E+01   2.9E+00
   51   95  1.608E+02  0.000E+00  0.000E+00  0.000E+00  0.000E+00  0.000E+00  2.204E+01   0.0E+00
   51   99  1.561E+02  0.000E+00  0.000E+00  0.000E+00  0.000E+00  0.000E+00  3.883E+01   0.0E+00
   52   53  3.890E+04  0.000E+00  0.000E+00  0.000E+00  1.054E-08  0.000E+00  0.000E+00   0.0E+00
   52   55  5.675E+03  0.000E+00  0.000E+00  0.000E+00  7.604E-05  1.855E+00  0.000E+00   0.0E+00
   52   56  5.085E+03  0.000E+00  0.000E+00  0.000E+00  3.926E-03  0.000E+00  0.000E+00   0.0E+00
   52   57  3.166E+03  0.000E+00  0.000E+00  0.000E+00  2.678E-02  4.516E-03  0.000E+00   0.0E+00
   52   58  3.180E+03  0.000E+00  0.000E+00  0.000E+00  0.000E+00  2.736E+01  0.000E+00   0.0E+00
   52   59  1.120E+03  0.000E+00  0.000E+00  0.000E+00  2.981E+00  0.000E+00  0.000E+00   0.0E+00
   52   60  1.040E+03  0.000E+00  0.000E+00  0.000E+00  3.210E+00  4.947E+00  0.000E+00   0.0E+00
   52   61  7.083E+02  0.000E+00  0.000E+00  0.000E+00  0.000E+00  0.000E+00  3.786E-04   0.0E+00
   52   62  6.290E+02  9.522E+05  1.130E-04  4.678E-04  0.000E+00  0.000E+00  2.553E-04   8.6E+00
   52   63  5.734E+02  2.628E+05  1.295E-05  4.890E-05  0.000E+00  0.000E+00  0.000E+00   1.0E+01
   52   64  5.092E+02  1.940E+07  1.508E-03  5.057E-03  0.000E+00  0.000E+00  1.696E-03   6.3E+00
   52   65  4.577E+02  1.429E+07  4.488E-04  1.353E-03  0.000E+00  0.000E+00  0.000E+00   7.0E+00
   52   66  3.303E+02  0.000E+00  0.000E+00  0.000E+00  7.888E-04  2.601E-01  0.000E+00   0.0E+00
   52   68  3.040E+02  0.000E+00  0.000E+00  0.000E+00  8.819E+00  0.000E+00  0.000E+00   0.0E+00
   52   69  2.951E+02  0.000E+00  0.000E+00  0.000E+00  4.235E+00  5.077E-02  0.000E+00   0.0E+00
   52   70  2.865E+02  0.000E+00  0.000E+00  0.000E+00  3.706E+01  0.000E+00  0.000E+00   0.0E+00
   52   71  2.863E+02  0.000E+00  0.000E+00  0.000E+00  0.000E+00  9.597E-02  0.000E+00   0.0E+00
   52   72  2.775E+02  0.000E+00  0.000E+00  0.000E+00  1.373E-01  7.460E-01  0.000E+00   0.0E+00
   52   73  2.744E+02  0.000E+00  0.000E+00  0.000E+00  2.418E+01  0.000E+00  0.000E+00   0.0E+00
   52   74  2.723E+02  0.000E+00  0.000E+00  0.000E+00  0.000E+00  5.302E-01  0.000E+00   0.0E+00
   52   75  2.720E+02  0.000E+00  0.000E+00  0.000E+00  2.412E+01  1.138E-01  0.000E+00   0.0E+00
   52   76  2.672E+02  0.000E+00  0.000E+00  0.000E+00  0.000E+00  8.880E+00  0.000E+00   0.0E+00
   52   77  2.603E+02  0.000E+00  0.000E+00  0.000E+00  4.978E+01  3.544E-01  0.000E+00   0.0E+00
   52   78  2.419E+02  2.207E+05  3.873E-06  6.169E-06  0.000E+00  0.000E+00  1.561E-03   2.1E+01
   52   79  2.407E+02  2.462E+05  2.139E-06  3.391E-06  0.000E+00  0.000E+00  0.000E+00   1.9E+01
   52   80  2.364E+02  0.000E+00  0.000E+00  0.000E+00  0.000E+00  1.863E+00  0.000E+00   0.0E+00
   52   81  1.851E+02  5.112E+07  2.626E-04  3.201E-04  0.000E+00  0.000E+00  0.000E+00   8.3E-01
   52   82  1.837E+02  9.810E+07  9.923E-04  1.200E-03  0.000E+00  0.000E+00  1.007E+00   8.6E-01
   52   84  1.810E+02  0.000E+00  0.000E+00  0.000E+00  0.000E+00  0.000E+00  2.709E+00   0.0E+00
   52   86  1.768E+02  0.000E+00  0.000E+00  0.000E+00  0.000E+00  0.000E+00  1.533E-01   0.0E+00
   52   87  1.743E+02  5.737E+05  5.224E-06  5.994E-06  0.000E+00  0.000E+00  1.492E-02   1.0E-02
   52   89  1.702E+02  0.000E+00  0.000E+00  0.000E+00  3.512E+02  1.358E-02  0.000E+00   0.0E+00
   52   90  1.687E+02  2.988E+07  1.275E-04  1.417E-04  0.000E+00  0.000E+00  0.000E+00   2.1E-01
   52   91  1.681E+02  0.000E+00  0.000E+00  0.000E+00  7.618E+02  0.000E+00  0.000E+00   0.0E+00
   52   92  1.681E+02  0.000E+00  0.000E+00  0.000E+00  0.000E+00  0.000E+00  5.651E-01   0.0E+00
   52   93  1.676E+02  4.831E+06  4.069E-05  4.489E-05  0.000E+00  0.000E+00  3.334E-01   8.3E-03
   52   95  1.664E+02  0.000E+00  0.000E+00  0.000E+00  0.000E+00  0.000E+00  3.856E-01   0.0E+00
   52   96  1.647E+02  0.000E+00  0.000E+00  0.000E+00  0.000E+00  1.767E+01  0.000E+00   0.0E+00
   52   97  1.637E+02  0.000E+00  0.000E+00  0.000E+00  3.228E+01  4.857E+00  0.000E+00   0.0E+00
   52   98  1.636E+02  1.338E+05  1.074E-06  1.156E-06  0.000E+00  0.000E+00  1.271E+00   2.0E+02
   52   99  1.614E+02  0.000E+00  0.000E+00  0.000E+00  0.000E+00  0.000E+00  5.687E-01   0.0E+00
   52  100  1.582E+02  0.000E+00  0.000E+00  0.000E+00  0.000E+00  1.138E-02  0.000E+00   0.0E+00
   52  101  1.569E+02  1.342E+07  4.950E-05  5.112E-05  0.000E+00  0.000E+00  0.000E+00   3.5E+01
   52  102  1.522E+02  9.199E+06  6.389E-05  6.402E-05  0.000E+00  0.000E+00  1.968E+01   6.4E+01
   53   54  2.704E+04  0.000E+00  0.000E+00  0.000E+00  5.546E-07  4.901E-01  0.000E+00   0.0E+00
   53   55  6.644E+03  0.000E+00  0.000E+00  0.000E+00  7.157E-04  1.949E-01  0.000E+00   0.0E+00
   53   56  5.849E+03  0.000E+00  0.000E+00  0.000E+00  1.061E-04  1.391E+01  0.000E+00   0.0E+00
   53   57  3.446E+03  0.000E+00  0.000E+00  0.000E+00  1.527E-01  3.868E+01  0.000E+00   0.0E+00
   53   58  3.462E+03  0.000E+00  0.000E+00  0.000E+00  2.503E-02  0.000E+00  0.000E+00   0.0E+00
   53   59  1.153E+03  0.000E+00  0.000E+00  0.000E+00  6.016E-01  1.034E+00  0.000E+00   0.0E+00
   53   60  1.068E+03  0.000E+00  0.000E+00  0.000E+00  1.349E+00  5.107E+01  0.000E+00   0.0E+00
   53   61  7.215E+02  7.240E+02  5.649E-08  8.050E-07  0.000E+00  0.000E+00  1.001E-05   5.0E+00
   53   62  6.393E+02  1.095E+05  4.475E-06  5.652E-05  0.000E+00  0.000E+00  1.015E-05   1.5E+00
   53   63  5.820E+02  0.000E+00  0.000E+00  0.000E+00  0.000E+00  0.000E+00  9.088E-05   0.0E+00
   53   64  5.160E+02  2.437E+06  6.484E-05  6.609E-04  0.000E+00  0.000E+00  1.096E-03   2.4E+00
   53   65  4.632E+02  0.000E+00  0.000E+00  0.000E+00  0.000E+00  0.000E+00  1.589E-02   0.0E+00
   53   66  3.331E+02  0.000E+00  0.000E+00  0.000E+00  5.187E-02  1.480E-03  0.000E+00   0.0E+00
   53   67  3.074E+02  0.000E+00  0.000E+00  0.000E+00  1.200E-02  9.372E-01  0.000E+00   0.0E+00
   53   68  3.064E+02  0.000E+00  0.000E+00  0.000E+00  5.151E-01  5.868E+00  0.000E+00   0.0E+00
   53   69  2.973E+02  0.000E+00  0.000E+00  0.000E+00  5.489E+00  6.150E+00  0.000E+00   0.0E+00
   53   70  2.887E+02  0.000E+00  0.000E+00  0.000E+00  2.501E-02  1.035E+01  0.000E+00   0.0E+00
   53   71  2.884E+02  0.000E+00  0.000E+00  0.000E+00  4.994E-01  0.000E+00  0.000E+00   0.0E+00
   53   72  2.795E+02  0.000E+00  0.000E+00  0.000E+00  2.866E-01  1.127E-02  0.000E+00   0.0E+00
   53   73  2.763E+02  0.000E+00  0.000E+00  0.000E+00  6.199E-02  2.690E-02  0.000E+00   0.0E+00
   53   74  2.742E+02  0.000E+00  0.000E+00  0.000E+00  1.928E+00  0.000E+00  0.000E+00   0.0E+00
   53   75  2.739E+02  0.000E+00  0.000E+00  0.000E+00  1.732E+01  9.786E+00  0.000E+00   0.0E+00
   53   76  2.690E+02  0.000E+00  0.000E+00  0.000E+00  7.126E-03  0.000E+00  0.000E+00   0.0E+00
   53   77  2.621E+02  0.000E+00  0.000E+00  0.000E+00  7.001E+01  1.735E+00  0.000E+00   0.0E+00
   53   78  2.434E+02  5.931E+05  3.513E-06  1.689E-05  0.000E+00  0.000E+00  1.962E-05   8.6E+00
   53   79  2.422E+02  0.000E+00  0.000E+00  0.000E+00  0.000E+00  0.000E+00  9.367E-02   0.0E+00
   53   80  2.378E+02  0.000E+00  0.000E+00  0.000E+00  5.740E+00  0.000E+00  0.000E+00   0.0E+00
   53   81  1.860E+02  0.000E+00  0.000E+00  0.000E+00  0.000E+00  0.000E+00  3.385E-03   0.0E+00
   53   82  1.845E+02  5.184E+05  1.764E-06  6.432E-06  0.000E+00  0.000E+00  1.256E-02   1.0E+00
   53   83  1.828E+02  0.000E+00  0.000E+00  0.000E+00  0.000E+00  0.000E+00  1.116E+00   0.0E+00
   53   84  1.819E+02  8.382E+06  4.156E-05  1.493E-04  0.000E+00  0.000E+00  9.972E-03   1.6E+00
   53   85  1.805E+02  1.123E+07  7.314E-05  2.608E-04  0.000E+00  0.000E+00  1.451E+00   1.1E+00
   53   86  1.776E+02  4.207E+07  1.990E-04  6.980E-04  0.000E+00  0.000E+00  7.250E-01   6.2E-01
   53   87  1.751E+02  4.520E+07  1.384E-04  4.787E-04  0.000E+00  0.000E+00  3.203E-03   4.3E-01
   53   88  1.730E+02  6.841E+06  4.094E-05  1.399E-04  0.000E+00  0.000E+00  5.813E+00   2.2E-02
   53   89  1.709E+02  0.000E+00  0.000E+00  0.000E+00  3.447E+03  2.202E+00  0.000E+00   0.0E+00
   53   90  1.694E+02  0.000E+00  0.000E+00  0.000E+00  0.000E+00  0.000E+00  2.372E+01   0.0E+00
   53   91  1.688E+02  0.000E+00  0.000E+00  0.000E+00  3.049E+01  1.490E-01  0.000E+00   0.0E+00
   53   92  1.688E+02  1.825E+07  7.796E-05  2.599E-04  0.000E+00  0.000E+00  1.844E+01   2.4E-01
   53   93  1.683E+02  6.731E+07  1.906E-04  6.336E-04  0.000E+00  0.000E+00  2.569E+01   1.0E+00
   53   94  1.681E+02  1.183E+06  6.688E-06  2.221E-05  0.000E+00  0.000E+00  6.072E-01   4.1E+00
   53   95  1.671E+02  3.256E+06  1.363E-05  4.496E-05  0.000E+00  0.000E+00  6.460E-01   2.5E+00
   53   96  1.654E+02  0.000E+00  0.000E+00  0.000E+00  7.269E+02  0.000E+00  0.000E+00   0.0E+00
   53   97  1.644E+02  0.000E+00  0.000E+00  0.000E+00  1.666E+02  6.656E-03  0.000E+00   0.0E+00
   53   98  1.643E+02  6.666E+07  1.798E-04  5.832E-04  0.000E+00  0.000E+00  7.429E-02   8.3E-01
   53   99  1.620E+02  4.909E+07  1.932E-04  6.183E-04  0.000E+00  0.000E+00  4.520E-01   3.9E-01
   53  100  1.589E+02  0.000E+00  0.000E+00  0.000E+00  1.713E-01  0.000E+00  0.000E+00   0.0E+00
   53  101  1.575E+02  0.000E+00  0.000E+00  0.000E+00  0.000E+00  0.000E+00  1.845E+00   0.0E+00
   53  102  1.528E+02  1.389E+07  3.240E-05  9.779E-05  0.000E+00  0.000E+00  1.116E+00   6.6E-02
   54   55  8.809E+03  0.000E+00  0.000E+00  0.000E+00  3.955E-04  0.000E+00  0.000E+00   0.0E+00
   54   56  7.464E+03  0.000E+00  0.000E+00  0.000E+00  2.244E-03  4.572E+00  0.000E+00   0.0E+00
   54   57  3.950E+03  0.000E+00  0.000E+00  0.000E+00  7.435E-03  0.000E+00  0.000E+00   0.0E+00
   54   59  1.205E+03  0.000E+00  0.000E+00  0.000E+00  4.256E+00  3.156E+00  0.000E+00   0.0E+00
   54   60  1.112E+03  0.000E+00  0.000E+00  0.000E+00  5.777E-01  0.000E+00  0.000E+00   0.0E+00
   54   61  7.412E+02  3.338E+03  2.062E-07  4.026E-06  0.000E+00  0.000E+00  4.644E-07   3.1E+01
   54   62  6.548E+02  0.000E+00  0.000E+00  0.000E+00  0.000E+00  0.000E+00  3.635E-05   0.0E+00
   54   64  5.260E+02  0.000E+00  0.000E+00  0.000E+00  0.000E+00  0.000E+00  1.110E-03   0.0E+00
   54   66  3.373E+02  0.000E+00  0.000E+00  0.000E+00  1.038E+00  0.000E+00  0.000E+00   0.0E+00
   54   67  3.109E+02  0.000E+00  0.000E+00  0.000E+00  6.457E-01  1.173E+01  0.000E+00   0.0E+00
   54   68  3.099E+02  0.000E+00  0.000E+00  0.000E+00  4.135E+00  8.576E-01  0.000E+00   0.0E+00
   54   69  3.006E+02  0.000E+00  0.000E+00  0.000E+00  1.194E+00  0.000E+00  0.000E+00   0.0E+00
   54   70  2.918E+02  0.000E+00  0.000E+00  0.000E+00  8.645E+00  4.475E+00  0.000E+00   0.0E+00
   54   72  2.824E+02  0.000E+00  0.000E+00  0.000E+00  3.411E+00  0.000E+00  0.000E+00   0.0E+00
   54   73  2.792E+02  0.000E+00  0.000E+00  0.000E+00  1.587E+01  1.114E+01  0.000E+00   0.0E+00
   54   75  2.767E+02  0.000E+00  0.000E+00  0.000E+00  1.150E+01  0.000E+00  0.000E+00   0.0E+00
   54   77  2.647E+02  0.000E+00  0.000E+00  0.000E+00  1.636E+00  0.000E+00  0.000E+00   0.0E+00
   54   78  2.457E+02  0.000E+00  0.000E+00  0.000E+00  0.000E+00  0.000E+00  1.276E-01   0.0E+00
   54   82  1.858E+02  0.000E+00  0.000E+00  0.000E+00  0.000E+00  0.000E+00  1.229E-01   0.0E+00
   54   83  1.841E+02  4.800E+05  3.047E-06  1.477E-05  0.000E+00  0.000E+00  2.062E+00   2.8E-01
   54   84  1.831E+02  9.326E+07  3.516E-04  1.695E-03  0.000E+00  0.000E+00  7.571E-01   1.0E+00
   54   85  1.817E+02  3.286E+07  1.627E-04  7.785E-04  0.000E+00  0.000E+00  2.929E-01   8.7E-01
   54   86  1.788E+02  2.317E+06  8.328E-06  3.921E-05  0.000E+00  0.000E+00  2.292E-04   3.2E+00
   54   87  1.762E+02  0.000E+00  0.000E+00  0.000E+00  0.000E+00  0.000E+00  2.083E-01   0.0E+00
   54   88  1.741E+02  1.969E+08  8.951E-04  4.105E-03  0.000E+00  0.000E+00  6.258E-01   7.0E-01
   54   89  1.720E+02  0.000E+00  0.000E+00  0.000E+00  5.503E+02  0.000E+00  0.000E+00   0.0E+00
   54   91  1.698E+02  0.000E+00  0.000E+00  0.000E+00  3.235E+03  8.844E-01  0.000E+00   0.0E+00
   54   92  1.699E+02  4.570E+07  1.482E-04  6.630E-04  0.000E+00  0.000E+00  4.802E+00   5.1E-01
   54   93  1.694E+02  0.000E+00  0.000E+00  0.000E+00  0.000E+00  0.000E+00  3.907E+00   0.0E+00
   54   94  1.692E+02  6.834E+07  2.933E-04  1.307E-03  0.000E+00  0.000E+00  1.745E+01   1.3E+00
   54   95  1.681E+02  6.766E+07  2.150E-04  9.518E-04  0.000E+00  0.000E+00  9.110E-03   3.5E-01
   54   97  1.654E+02  0.000E+00  0.000E+00  0.000E+00  2.867E+02  0.000E+00  0.000E+00   0.0E+00
   54   98  1.653E+02  0.000E+00  0.000E+00  0.000E+00  0.000E+00  0.000E+00  1.931E+01   0.0E+00
   54   99  1.630E+02  5.776E+07  1.725E-04  7.407E-04  0.000E+00  0.000E+00  2.729E+01   8.5E-01
   54  102  1.537E+02  0.000E+00  0.000E+00  0.000E+00  0.000E+00  0.000E+00  3.884E+00   0.0E+00
   55   56  4.888E+04  0.000E+00  0.000E+00  0.000E+00  6.836E-08  9.713E-04  0.000E+00   0.0E+00
   55   57  7.160E+03  0.000E+00  0.000E+00  0.000E+00  9.641E-04  1.897E-01  0.000E+00   0.0E+00
   55   58  7.231E+03  0.000E+00  0.000E+00  0.000E+00  2.821E-05  4.439E+01  0.000E+00   0.0E+00
   55   59  1.395E+03  0.000E+00  0.000E+00  0.000E+00  1.908E-01  6.501E+01  0.000E+00   0.0E+00
   55   60  1.273E+03  0.000E+00  0.000E+00  0.000E+00  2.245E-02  2.984E+02  0.000E+00   0.0E+00
   55   61  8.093E+02  4.110E+02  6.053E-08  6.452E-07  0.000E+00  0.000E+00  2.229E-05   7.0E+01
   55   62  7.074E+02  9.702E+05  7.279E-05  6.781E-04  0.000E+00  0.000E+00  1.363E-05   5.2E+00
   55   63  6.379E+02  9.117E+04  2.781E-06  2.336E-05  0.000E+00  0.000E+00  3.408E-05   9.4E+00
   55   64  5.594E+02  2.683E+07  1.259E-03  9.271E-03  0.000E+00  0.000E+00  1.031E-03   3.7E+00
   55   65  4.979E+02  7.878E+06  1.464E-04  9.598E-04  0.000E+00  0.000E+00  4.557E-03   4.2E+00
   55   66  3.507E+02  0.000E+00  0.000E+00  0.000E+00  4.351E-02  4.131E+00  0.000E+00   0.0E+00
   55   67  3.223E+02  0.000E+00  0.000E+00  0.000E+00  9.490E-02  0.000E+00  0.000E+00   0.0E+00
   55   68  3.212E+02  0.000E+00  0.000E+00  0.000E+00  4.325E-01  5.071E-03  0.000E+00   0.0E+00
   55   69  3.113E+02  0.000E+00  0.000E+00  0.000E+00  7.368E-01  4.889E-01  0.000E+00   0.0E+00
   55   70  3.018E+02  0.000E+00  0.000E+00  0.000E+00  4.341E+00  2.351E-01  0.000E+00   0.0E+00
   55   71  3.015E+02  0.000E+00  0.000E+00  0.000E+00  1.294E-02  1.662E+00  0.000E+00   0.0E+00
   55   72  2.918E+02  0.000E+00  0.000E+00  0.000E+00  1.129E+00  1.513E-01  0.000E+00   0.0E+00
   55   73  2.883E+02  0.000E+00  0.000E+00  0.000E+00  3.574E+00  1.131E+00  0.000E+00   0.0E+00
   55   74  2.860E+02  0.000E+00  0.000E+00  0.000E+00  4.230E-02  1.595E+00  0.000E+00   0.0E+00
   55   75  2.857E+02  0.000E+00  0.000E+00  0.000E+00  2.656E+00  1.799E-02  0.000E+00   0.0E+00
   55   76  2.804E+02  0.000E+00  0.000E+00  0.000E+00  2.039E+00  3.525E-02  0.000E+00   0.0E+00
   55   77  2.729E+02  0.000E+00  0.000E+00  0.000E+00  2.147E+00  2.989E-01  0.000E+00   0.0E+00
   55   78  2.527E+02  2.136E+07  2.045E-04  6.806E-04  0.000E+00  0.000E+00  5.977E-03   2.5E+00
   55   79  2.514E+02  9.526E+06  4.513E-05  1.494E-04  0.000E+00  0.000E+00  2.270E-02   2.2E+00
   55   80  2.466E+02  0.000E+00  0.000E+00  0.000E+00  6.413E-01  9.618E+00  0.000E+00   0.0E+00
   55   81  1.914E+02  8.994E+07  2.469E-04  6.221E-04  0.000E+00  0.000E+00  2.064E+00   9.2E-01
   55   82  1.898E+02  5.986E+05  3.234E-06  8.083E-06  0.000E+00  0.000E+00  1.343E-02   9.6E-02
   55   84  1.870E+02  1.840E+07  1.447E-04  3.564E-04  0.000E+00  0.000E+00  1.662E+00   4.3E-01
   55   85  1.856E+02  0.000E+00  0.000E+00  0.000E+00  0.000E+00  0.000E+00  8.883E-01   0.0E+00
   55   86  1.825E+02  5.948E+07  4.454E-04  1.070E-03  0.000E+00  0.000E+00  9.347E-01   1.2E+00
   55   87  1.798E+02  2.652E+05  1.285E-06  3.043E-06  0.000E+00  0.000E+00  1.661E-02   1.8E+00
   55   88  1.777E+02  0.000E+00  0.000E+00  0.000E+00  0.000E+00  0.000E+00  4.337E-01   0.0E+00
   55   89  1.754E+02  0.000E+00  0.000E+00  0.000E+00  2.402E+02  6.938E+00  0.000E+00   0.0E+00
   55   90  1.739E+02  1.834E+07  4.157E-05  9.518E-05  0.000E+00  0.000E+00  1.365E-01   7.1E-01
   55   91  1.732E+02  0.000E+00  0.000E+00  0.000E+00  7.532E+02  2.476E+00  0.000E+00   0.0E+00
   55   92  1.732E+02  3.594E+07  2.424E-04  5.528E-04  0.000E+00  0.000E+00  1.925E+00   9.5E-01
   55   93  1.727E+02  3.335E+05  1.491E-06  3.390E-06  0.000E+00  0.000E+00  1.390E-04   1.4E-01
   55   94  1.725E+02  0.000E+00  0.000E+00  0.000E+00  0.000E+00  0.000E+00  2.823E+00   0.0E+00
   55   95  1.714E+02  5.134E+08  3.391E-03  7.652E-03  0.000E+00  0.000E+00  2.994E-02   1.3E+00
   55   96  1.696E+02  0.000E+00  0.000E+00  0.000E+00  6.696E+02  3.395E+00  0.000E+00   0.0E+00
   55   97  1.686E+02  0.000E+00  0.000E+00  0.000E+00  1.124E+03  6.373E-02  0.000E+00   0.0E+00
   55   98  1.684E+02  4.568E+07  1.942E-04  4.308E-04  0.000E+00  0.000E+00  2.882E-01   1.0E+00
   55   99  1.661E+02  4.263E+08  2.644E-03  5.782E-03  0.000E+00  0.000E+00  7.551E-02   1.3E+00
   55  100  1.628E+02  0.000E+00  0.000E+00  0.000E+00  2.736E+02  8.443E-01  0.000E+00   0.0E+00
   55  101  1.613E+02  1.503E+07  2.931E-05  6.226E-05  0.000E+00  0.000E+00  1.112E+01   4.9E+00
   55  102  1.564E+02  9.335E+08  3.423E-03  7.049E-03  0.000E+00  0.000E+00  2.954E+01   1.6E+00
   56   57  8.388E+03  0.000E+00  0.000E+00  0.000E+00  8.443E-05  2.248E+01  0.000E+00   0.0E+00
   56   58  8.486E+03  0.000E+00  0.000E+00  0.000E+00  5.864E-04  0.000E+00  0.000E+00   0.0E+00
   56   59  1.436E+03  0.000E+00  0.000E+00  0.000E+00  2.874E-02  1.029E-02  0.000E+00   0.0E+00
   56   60  1.307E+03  0.000E+00  0.000E+00  0.000E+00  5.086E-01  3.414E+02  0.000E+00   0.0E+00
   56   61  8.230E+02  1.374E+03  1.395E-07  2.268E-06  0.000E+00  0.000E+00  1.418E-05   5.9E+01
   56   62  7.178E+02  1.424E+06  7.334E-05  1.040E-03  0.000E+00  0.000E+00  3.089E-06   4.8E+00
   56   63  6.463E+02  0.000E+00  0.000E+00  0.000E+00  0.000E+00  0.000E+00  5.088E-07   0.0E+00
   56   64  5.659E+02  3.918E+07  1.254E-03  1.402E-02  0.000E+00  0.000E+00  7.929E-06   3.4E+00
   56   65  5.030E+02  0.000E+00  0.000E+00  0.000E+00  0.000E+00  0.000E+00  2.489E-03   0.0E+00
   56   66  3.533E+02  0.000E+00  0.000E+00  0.000E+00  6.030E-01  9.835E-02  0.000E+00   0.0E+00
   56   67  3.244E+02  0.000E+00  0.000E+00  0.000E+00  2.332E-01  1.786E+00  0.000E+00   0.0E+00
   56   68  3.234E+02  0.000E+00  0.000E+00  0.000E+00  4.320E+00  7.830E+00  0.000E+00   0.0E+00
   56   69  3.133E+02  0.000E+00  0.000E+00  0.000E+00  4.944E-01  4.695E+00  0.000E+00   0.0E+00
   56   70  3.037E+02  0.000E+00  0.000E+00  0.000E+00  2.426E+01  1.919E+00  0.000E+00   0.0E+00
   56   71  3.034E+02  0.000E+00  0.000E+00  0.000E+00  1.439E-02  0.000E+00  0.000E+00   0.0E+00
   56   72  2.935E+02  0.000E+00  0.000E+00  0.000E+00  4.107E-01  4.831E+00  0.000E+00   0.0E+00
   56   73  2.900E+02  0.000E+00  0.000E+00  0.000E+00  1.829E+01  2.396E+00  0.000E+00   0.0E+00
   56   74  2.877E+02  0.000E+00  0.000E+00  0.000E+00  6.454E-03  0.000E+00  0.000E+00   0.0E+00
   56   75  2.874E+02  0.000E+00  0.000E+00  0.000E+00  4.910E+00  1.589E+00  0.000E+00   0.0E+00
   56   76  2.820E+02  0.000E+00  0.000E+00  0.000E+00  2.062E-01  0.000E+00  0.000E+00   0.0E+00
   56   77  2.744E+02  0.000E+00  0.000E+00  0.000E+00  4.878E+00  3.302E+00  0.000E+00   0.0E+00
   56   78  2.540E+02  3.788E+07  2.443E-04  1.226E-03  0.000E+00  0.000E+00  7.108E-02   1.4E+00
   56   79  2.527E+02  0.000E+00  0.000E+00  0.000E+00  0.000E+00  0.000E+00  1.346E-03   0.0E+00
   56   80  2.479E+02  0.000E+00  0.000E+00  0.000E+00  3.820E+01  0.000E+00  0.000E+00   0.0E+00
   56   81  1.921E+02  0.000E+00  0.000E+00  0.000E+00  0.000E+00  0.000E+00  3.674E-01   0.0E+00
   56   82  1.906E+02  7.724E+07  2.803E-04  1.055E-03  0.000E+00  0.000E+00  1.132E+00   1.1E+00
   56   83  1.887E+02  0.000E+00  0.000E+00  0.000E+00  0.000E+00  0.000E+00  5.274E-01   0.0E+00
   56   84  1.877E+02  7.825E+05  4.133E-06  1.533E-05  0.000E+00  0.000E+00  3.849E-01   1.1E+00
   56   85  1.863E+02  3.608E+07  2.502E-04  9.205E-04  0.000E+00  0.000E+00  1.657E-01   8.1E-01
   56   86  1.832E+02  6.313E+06  3.175E-05  1.149E-04  0.000E+00  0.000E+00  6.192E-01   2.5E+00
   56   87  1.805E+02  3.972E+06  1.293E-05  4.608E-05  0.000E+00  0.000E+00  6.562E-03   5.5E-02
   56   88  1.783E+02  5.229E+07  3.323E-04  1.170E-03  0.000E+00  0.000E+00  8.630E-01   1.9E+00
   56   89  1.761E+02  0.000E+00  0.000E+00  0.000E+00  3.059E+00  3.694E-03  0.000E+00   0.0E+00
   56   90  1.745E+02  0.000E+00  0.000E+00  0.000E+00  0.000E+00  0.000E+00  5.023E+00   0.0E+00
   56   91  1.738E+02  0.000E+00  0.000E+00  0.000E+00  1.935E+03  1.992E-01  0.000E+00   0.0E+00
   56   92  1.738E+02  3.088E+07  1.399E-04  4.801E-04  0.000E+00  0.000E+00  7.612E-02   7.9E-01
   56   93  1.733E+02  1.679E+07  5.039E-05  1.725E-04  0.000E+00  0.000E+00  1.369E+00   6.2E-02
   56   94  1.731E+02  2.250E+08  1.348E-03  4.610E-03  0.000E+00  0.000E+00  1.098E+00   1.3E+00
   56   95  1.720E+02  5.628E+07  2.496E-04  8.477E-04  0.000E+00  0.000E+00  9.057E-01   1.3E+00
   56   96  1.702E+02  0.000E+00  0.000E+00  0.000E+00  3.270E+02  0.000E+00  0.000E+00   0.0E+00
   56   97  1.692E+02  0.000E+00  0.000E+00  0.000E+00  1.807E+03  1.887E-01  0.000E+00   0.0E+00
   56   98  1.690E+02  4.096E+06  1.169E-05  3.904E-05  0.000E+00  0.000E+00  1.037E+00   4.6E-01
   56   99  1.666E+02  6.886E+07  2.867E-04  9.436E-04  0.000E+00  0.000E+00  5.036E+00   1.1E+00
   56  100  1.633E+02  0.000E+00  0.000E+00  0.000E+00  5.903E+02  0.000E+00  0.000E+00   0.0E+00
   56  101  1.618E+02  0.000E+00  0.000E+00  0.000E+00  0.000E+00  0.000E+00  4.298E+01   0.0E+00
   56  102  1.569E+02  2.559E+09  6.295E-03  1.951E-02  0.000E+00  0.000E+00  3.034E+01   6.5E-01
   57   58  7.282E+05  0.000E+00  0.000E+00  0.000E+00  1.163E-13  7.212E-08  0.000E+00   0.0E+00
   57   59  1.733E+03  0.000E+00  0.000E+00  0.000E+00  5.258E-02  1.134E+02  0.000E+00   0.0E+00
   57   60  1.548E+03  0.000E+00  0.000E+00  0.000E+00  1.782E-01  2.204E-01  0.000E+00   0.0E+00
   57   61  9.125E+02  3.454E+00  6.467E-10  7.771E-09  0.000E+00  0.000E+00  5.447E-07   9.8E+02
   57   62  7.850E+02  8.508E+04  7.860E-06  8.125E-05  0.000E+00  0.000E+00  3.028E-05   7.3E+00
   57   63  7.003E+02  5.765E+05  2.119E-05  1.954E-04  0.000E+00  0.000E+00  5.280E-05   4.8E+00
   57   64  6.068E+02  2.688E+06  1.484E-04  1.186E-03  0.000E+00  0.000E+00  5.747E-04   3.8E+00
   57   65  5.351E+02  4.555E+07  9.776E-04  6.888E-03  0.000E+00  0.000E+00  1.713E-03   3.6E+00
   57   66  3.688E+02  0.000E+00  0.000E+00  0.000E+00  6.585E-02  3.180E-01  0.000E+00   0.0E+00
   57   67  3.375E+02  0.000E+00  0.000E+00  0.000E+00  1.674E-02  0.000E+00  0.000E+00   0.0E+00
   57   68  3.363E+02  0.000E+00  0.000E+00  0.000E+00  9.677E-01  1.174E-01  0.000E+00   0.0E+00
   57   69  3.254E+02  0.000E+00  0.000E+00  0.000E+00  2.073E+00  4.689E+00  0.000E+00   0.0E+00
   57   70  3.151E+02  0.000E+00  0.000E+00  0.000E+00  4.816E+00  2.240E-02  0.000E+00   0.0E+00
   57   71  3.148E+02  0.000E+00  0.000E+00  0.000E+00  4.150E-01  6.633E+00  0.000E+00   0.0E+00
   57   72  3.042E+02  0.000E+00  0.000E+00  0.000E+00  1.621E-01  8.713E+00  0.000E+00   0.0E+00
   57   73  3.004E+02  0.000E+00  0.000E+00  0.000E+00  2.845E+00  2.204E+00  0.000E+00   0.0E+00
   57   74  2.979E+02  0.000E+00  0.000E+00  0.000E+00  4.098E-01  2.257E+00  0.000E+00   0.0E+00
   57   75  2.975E+02  0.000E+00  0.000E+00  0.000E+00  1.105E+01  1.122E+00  0.000E+00   0.0E+00
   57   76  2.918E+02  0.000E+00  0.000E+00  0.000E+00  5.993E-01  3.174E+00  0.000E+00   0.0E+00
   57   77  2.837E+02  0.000E+00  0.000E+00  0.000E+00  3.032E+01  4.601E-01  0.000E+00   0.0E+00
   57   78  2.620E+02  3.855E+06  3.965E-05  1.368E-04  0.000E+00  0.000E+00  1.496E-02   1.0E+00
   57   79  2.605E+02  6.644E+07  3.381E-04  1.160E-03  0.000E+00  0.000E+00  3.218E-02   1.6E+00
   57   80  2.554E+02  0.000E+00  0.000E+00  0.000E+00  1.892E+00  4.260E-01  0.000E+00   0.0E+00
   57   81  1.966E+02  1.216E+07  3.524E-05  9.124E-05  0.000E+00  0.000E+00  3.226E-01   1.3E+00
   57   82  1.950E+02  1.322E+06  7.534E-06  1.934E-05  0.000E+00  0.000E+00  7.193E-02   6.2E-01
   57   84  1.920E+02  9.166E+05  7.599E-06  1.921E-05  0.000E+00  0.000E+00  1.294E-02   1.6E+00
   57   85  1.905E+02  0.000E+00  0.000E+00  0.000E+00  0.000E+00  0.000E+00  6.401E-02   0.0E+00
   57   86  1.872E+02  6.801E+06  5.363E-05  1.322E-04  0.000E+00  0.000E+00  6.170E-01   1.1E+00
   57   87  1.844E+02  1.806E+07  9.208E-05  2.236E-04  0.000E+00  0.000E+00  9.392E-01   1.3E+00
   57   88  1.822E+02  0.000E+00  0.000E+00  0.000E+00  0.000E+00  0.000E+00  6.865E-01   0.0E+00
   57   89  1.799E+02  0.000E+00  0.000E+00  0.000E+00  9.526E+02  2.002E-02  0.000E+00   0.0E+00
   57   90  1.782E+02  1.897E+08  4.516E-04  1.060E-03  0.000E+00  0.000E+00  2.478E+00   3.2E-01
   57   91  1.775E+02  0.000E+00  0.000E+00  0.000E+00  2.584E+02  2.136E-01  0.000E+00   0.0E+00
   57   92  1.775E+02  1.901E+07  1.346E-04  3.147E-04  0.000E+00  0.000E+00  7.073E+00   2.3E+00
   57   93  1.769E+02  3.012E+07  1.414E-04  3.295E-04  0.000E+00  0.000E+00  6.654E+00   4.0E-01
   57   94  1.768E+02  0.000E+00  0.000E+00  0.000E+00  0.000E+00  0.000E+00  8.657E-01   0.0E+00
   57   95  1.756E+02  5.750E+07  3.986E-04  9.215E-04  0.000E+00  0.000E+00  1.366E+00   1.4E+00
   57   96  1.737E+02  0.000E+00  0.000E+00  0.000E+00  7.136E+02  3.331E+00  0.000E+00   0.0E+00
   57   97  1.726E+02  0.000E+00  0.000E+00  0.000E+00  3.156E+02  1.782E+00  0.000E+00   0.0E+00
   57   98  1.725E+02  1.653E+08  7.373E-04  1.675E-03  0.000E+00  0.000E+00  6.859E-02   1.2E+00
   57   99  1.700E+02  2.066E+08  1.343E-03  3.007E-03  0.000E+00  0.000E+00  5.532E-01   1.6E+00
   57  100  1.666E+02  0.000E+00  0.000E+00  0.000E+00  8.614E+01  2.609E-02  0.000E+00   0.0E+00
   57  101  1.650E+02  3.249E+09  6.634E-03  1.441E-02  0.000E+00  0.000E+00  1.895E+00   7.1E-01
   57  102  1.599E+02  3.286E+08  1.259E-03  2.651E-03  0.000E+00  0.000E+00  4.971E+00   5.0E-01
   58   59  1.729E+03  0.000E+00  0.000E+00  0.000E+00  5.143E-02  0.000E+00  0.000E+00   0.0E+00
   58   60  1.544E+03  0.000E+00  0.000E+00  0.000E+00  5.996E-02  4.985E+01  0.000E+00   0.0E+00
   58   61  9.113E+02  0.000E+00  0.000E+00  0.000E+00  0.000E+00  0.000E+00  1.797E-07   0.0E+00
   58   62  7.841E+02  6.127E+04  1.130E-05  5.832E-05  0.000E+00  0.000E+00  7.297E-05   5.4E+00
   58   63  6.996E+02  3.755E+05  2.755E-05  1.269E-04  0.000E+00  0.000E+00  0.000E+00   5.0E+00
   58   64  6.063E+02  2.192E+06  2.416E-04  9.645E-04  0.000E+00  0.000E+00  9.856E-04   2.9E+00
   58   65  5.347E+02  2.847E+07  1.220E-03  4.296E-03  0.000E+00  0.000E+00  0.000E+00   4.2E+00
   58   66  3.686E+02  0.000E+00  0.000E+00  0.000E+00  3.159E-03  6.279E-01  0.000E+00   0.0E+00
   58   68  3.362E+02  0.000E+00  0.000E+00  0.000E+00  1.141E-03  0.000E+00  0.000E+00   0.0E+00
   58   69  3.253E+02  0.000E+00  0.000E+00  0.000E+00  5.397E-02  3.785E-01  0.000E+00   0.0E+00
   58   70  3.149E+02  0.000E+00  0.000E+00  0.000E+00  5.672E-03  0.000E+00  0.000E+00   0.0E+00
   58   71  3.146E+02  0.000E+00  0.000E+00  0.000E+00  0.000E+00  1.171E+00  0.000E+00   0.0E+00
   58   72  3.040E+02  0.000E+00  0.000E+00  0.000E+00  6.853E-01  5.014E-01  0.000E+00   0.0E+00
   58   73  3.003E+02  0.000E+00  0.000E+00  0.000E+00  5.502E-03  0.000E+00  0.000E+00   0.0E+00
   58   74  2.978E+02  0.000E+00  0.000E+00  0.000E+00  0.000E+00  1.358E+00  0.000E+00   0.0E+00
   58   75  2.974E+02  0.000E+00  0.000E+00  0.000E+00  1.443E+00  2.509E-02  0.000E+00   0.0E+00
   58   76  2.917E+02  0.000E+00  0.000E+00  0.000E+00  0.000E+00  2.825E-01  0.000E+00   0.0E+00
   58   77  2.836E+02  0.000E+00  0.000E+00  0.000E+00  1.077E+01  1.345E+00  0.000E+00   0.0E+00
   58   78  2.619E+02  4.498E+06  9.248E-05  1.595E-04  0.000E+00  0.000E+00  1.542E-02   1.8E+00
   58   79  2.605E+02  3.048E+07  3.100E-04  5.316E-04  0.000E+00  0.000E+00  0.000E+00   2.5E+00
   58   80  2.554E+02  0.000E+00  0.000E+00  0.000E+00  0.000E+00  1.051E+01  0.000E+00   0.0E+00
   58   81  1.966E+02  1.282E+07  7.424E-05  9.609E-05  0.000E+00  0.000E+00  0.000E+00   7.3E-01
   58   82  1.949E+02  4.359E+05  4.966E-06  6.374E-06  0.000E+00  0.000E+00  1.273E+00   3.6E-01
   58   84  1.920E+02  0.000E+00  0.000E+00  0.000E+00  0.000E+00  0.000E+00  8.916E-01   0.0E+00
   58   86  1.872E+02  0.000E+00  0.000E+00  0.000E+00  0.000E+00  0.000E+00  4.966E-01   0.0E+00
   58   87  1.844E+02  5.933E+07  6.047E-04  7.341E-04  0.000E+00  0.000E+00  1.696E-01   1.4E+00
   58   89  1.798E+02  0.000E+00  0.000E+00  0.000E+00  4.190E+02  1.190E+00  0.000E+00   0.0E+00
   58   90  1.782E+02  1.104E+07  5.252E-05  6.161E-05  0.000E+00  0.000E+00  0.000E+00   8.3E-01
   58   91  1.774E+02  0.000E+00  0.000E+00  0.000E+00  6.709E+01  0.000E+00  0.000E+00   0.0E+00
   58   92  1.774E+02  0.000E+00  0.000E+00  0.000E+00  0.000E+00  0.000E+00  1.852E+00   0.0E+00
   58   93  1.769E+02  2.488E+07  2.335E-04  2.720E-04  0.000E+00  0.000E+00  8.940E-01   8.6E-01
   58   95  1.755E+02  0.000E+00  0.000E+00  0.000E+00  0.000E+00  0.000E+00  1.295E-01   0.0E+00
   58   96  1.737E+02  0.000E+00  0.000E+00  0.000E+00  0.000E+00  3.894E-02  0.000E+00   0.0E+00
   58   97  1.726E+02  0.000E+00  0.000E+00  0.000E+00  5.250E+02  2.694E+00  0.000E+00   0.0E+00
   58   98  1.724E+02  9.143E+08  8.151E-03  9.255E-03  0.000E+00  0.000E+00  3.394E-02   1.4E+00
   58   99  1.700E+02  0.000E+00  0.000E+00  0.000E+00  0.000E+00  0.000E+00  3.622E-01   0.0E+00
   58  100  1.665E+02  0.000E+00  0.000E+00  0.000E+00  0.000E+00  5.102E-01  0.000E+00   0.0E+00
   58  101  1.650E+02  4.556E+08  1.859E-03  2.020E-03  0.000E+00  0.000E+00  0.000E+00   1.2E+00
   58  102  1.598E+02  1.055E+07  8.082E-05  8.505E-05  0.000E+00  0.000E+00  4.287E+00   4.6E+00
   59   60  1.445E+04  0.000E+00  0.000E+00  0.000E+00  6.518E-05  4.947E+00  0.000E+00   0.0E+00
   59   61  1.927E+03  1.575E+00  8.766E-10  3.337E-08  0.000E+00  0.000E+00  6.579E-11   1.3E+03
   59   62  1.435E+03  2.936E+04  6.041E-06  1.712E-04  0.000E+00  0.000E+00  4.599E-08   1.7E+01
   59   63  1.175E+03  0.000E+00  0.000E+00  0.000E+00  0.000E+00  0.000E+00  8.864E-07   0.0E+00
   59   64  9.337E+02  1.764E+06  1.537E-04  2.835E-03  0.000E+00  0.000E+00  2.492E-04   2.5E+00
   59   65  7.741E+02  0.000E+00  0.000E+00  0.000E+00  0.000E+00  0.000E+00  1.801E-04   0.0E+00
   59   66  4.685E+02  0.000E+00  0.000E+00  0.000E+00  6.362E-02  1.014E-02  0.000E+00   0.0E+00
   59   67  4.190E+02  0.000E+00  0.000E+00  0.000E+00  7.203E-03  4.171E+00  0.000E+00   0.0E+00
   59   68  4.173E+02  0.000E+00  0.000E+00  0.000E+00  1.884E-02  3.050E-02  0.000E+00   0.0E+00
   59   69  4.006E+02  0.000E+00  0.000E+00  0.000E+00  2.469E-01  5.727E-01  0.000E+00   0.0E+00
   59   70  3.851E+02  0.000E+00  0.000E+00  0.000E+00  1.020E-01  3.067E+00  0.000E+00   0.0E+00
   59   71  3.846E+02  0.000E+00  0.000E+00  0.000E+00  8.269E-01  0.000E+00  0.000E+00   0.0E+00
   59   72  3.689E+02  0.000E+00  0.000E+00  0.000E+00  1.413E-02  2.845E-01  0.000E+00   0.0E+00
   59   73  3.634E+02  0.000E+00  0.000E+00  0.000E+00  3.601E-02  7.131E+00  0.000E+00   0.0E+00
   59   74  3.598E+02  0.000E+00  0.000E+00  0.000E+00  4.164E-03  0.000E+00  0.000E+00   0.0E+00
   59   75  3.592E+02  0.000E+00  0.000E+00  0.000E+00  2.231E+00  1.309E-03  0.000E+00   0.0E+00
   59   76  3.509E+02  0.000E+00  0.000E+00  0.000E+00  5.699E+00  0.000E+00  0.000E+00   0.0E+00
   59   77  3.392E+02  0.000E+00  0.000E+00  0.000E+00  1.069E+00  2.858E+01  0.000E+00   0.0E+00
   59   78  3.086E+02  2.312E+06  2.201E-05  1.342E-04  0.000E+00  0.000E+00  6.455E-03   1.5E+00
   59   79  3.066E+02  0.000E+00  0.000E+00  0.000E+00  0.000E+00  0.000E+00  1.565E-02   0.0E+00
   59   80  2.996E+02  0.000E+00  0.000E+00  0.000E+00  8.176E+01  0.000E+00  0.000E+00   0.0E+00
   59   81  2.218E+02  0.000E+00  0.000E+00  0.000E+00  0.000E+00  0.000E+00  1.829E-01   0.0E+00
   59   82  2.197E+02  6.237E+04  3.009E-07  1.306E-06  0.000E+00  0.000E+00  6.943E-01   2.0E+00
   59   83  2.172E+02  0.000E+00  0.000E+00  0.000E+00  0.000E+00  0.000E+00  3.465E+00   0.0E+00
   59   84  2.159E+02  1.446E+07  1.011E-04  4.312E-04  0.000E+00  0.000E+00  1.651E+00   4.4E-01
   59   85  2.140E+02  5.573E+06  5.102E-05  2.157E-04  0.000E+00  0.000E+00  1.091E+00   1.4E-01
   59   86  2.099E+02  2.511E+07  1.659E-04  6.879E-04  0.000E+00  0.000E+00  2.647E-01   4.2E-01
   59   87  2.064E+02  3.223E+06  1.372E-05  5.594E-05  0.000E+00  0.000E+00  6.484E-01   2.4E-01
   59   88  2.036E+02  9.925E+06  8.222E-05  3.306E-04  0.000E+00  0.000E+00  4.499E+00   5.9E-01
   59   89  2.007E+02  0.000E+00  0.000E+00  0.000E+00  8.952E+00  6.088E-01  0.000E+00   0.0E+00
   59   90  1.986E+02  0.000E+00  0.000E+00  0.000E+00  0.000E+00  0.000E+00  1.914E+00   0.0E+00
   59   91  1.977E+02  0.000E+00  0.000E+00  0.000E+00  2.271E+01  6.445E-01  0.000E+00   0.0E+00
   59   92  1.977E+02  4.791E+07  2.808E-04  1.097E-03  0.000E+00  0.000E+00  8.008E-01   3.7E-01
   59   93  1.971E+02  6.020E+07  2.337E-04  9.097E-04  0.000E+00  0.000E+00  9.581E-02   5.3E-01
   59   94  1.969E+02  1.560E+07  1.208E-04  4.697E-04  0.000E+00  0.000E+00  3.200E-02   9.9E-02
   59   95  1.954E+02  1.357E+08  7.764E-04  2.996E-03  0.000E+00  0.000E+00  3.150E+00   1.2E+00
   59   96  1.931E+02  0.000E+00  0.000E+00  0.000E+00  3.734E+01  0.000E+00  0.000E+00   0.0E+00
   59   97  1.917E+02  0.000E+00  0.000E+00  0.000E+00  2.165E+02  1.297E-01  0.000E+00   0.0E+00
   59   98  1.915E+02  6.532E+07  2.395E-04  9.063E-04  0.000E+00  0.000E+00  4.148E+00   4.4E-02
   59   99  1.885E+02  3.928E+05  2.092E-06  7.791E-06  0.000E+00  0.000E+00  1.260E+00   2.5E+01
   59  100  1.843E+02  0.000E+00  0.000E+00  0.000E+00  5.014E+03  0.000E+00  0.000E+00   0.0E+00
   59  101  1.824E+02  0.000E+00  0.000E+00  0.000E+00  0.000E+00  0.000E+00  6.209E+00   0.0E+00
   59  102  1.761E+02  1.945E+07  6.030E-05  2.098E-04  0.000E+00  0.000E+00  1.153E+00   4.3E+00
   60   61  2.223E+03  5.387E-02  5.989E-11  1.754E-09  0.000E+00  0.000E+00  5.024E-11   2.8E+03
   60   62  1.593E+03  1.953E+03  7.430E-07  1.558E-05  0.000E+00  0.000E+00  1.686E-07   1.1E+01
   60   63  1.279E+03  7.591E+04  9.308E-06  1.568E-04  0.000E+00  0.000E+00  1.045E-06   1.2E+01
   60   64  9.982E+02  1.122E+05  1.675E-05  2.202E-04  0.000E+00  0.000E+00  3.057E-06   1.3E+00
   60   65  8.179E+02  1.042E+07  5.223E-04  5.625E-03  0.000E+00  0.000E+00  2.286E-05   3.9E+00
   60   66  4.842E+02  0.000E+00  0.000E+00  0.000E+00  3.281E-02  1.009E-01  0.000E+00   0.0E+00
   60   67  4.315E+02  0.000E+00  0.000E+00  0.000E+00  6.158E-04  0.000E+00  0.000E+00   0.0E+00
   60   68  4.297E+02  0.000E+00  0.000E+00  0.000E+00  2.264E-04  2.717E+00  0.000E+00   0.0E+00
   60   69  4.121E+02  0.000E+00  0.000E+00  0.000E+00  1.987E-01  4.103E-01  0.000E+00   0.0E+00
   60   70  3.956E+02  0.000E+00  0.000E+00  0.000E+00  1.136E-05  1.201E+00  0.000E+00   0.0E+00
   60   71  3.951E+02  0.000E+00  0.000E+00  0.000E+00  9.456E-01  1.052E+01  0.000E+00   0.0E+00
   60   72  3.786E+02  0.000E+00  0.000E+00  0.000E+00  8.349E-02  7.583E+00  0.000E+00   0.0E+00
   60   73  3.728E+02  0.000E+00  0.000E+00  0.000E+00  5.402E-05  7.098E-01  0.000E+00   0.0E+00
   60   74  3.689E+02  0.000E+00  0.000E+00  0.000E+00  8.824E-04  1.464E+01  0.000E+00   0.0E+00
   60   75  3.684E+02  0.000E+00  0.000E+00  0.000E+00  5.371E-01  8.828E-01  0.000E+00   0.0E+00
   60   76  3.596E+02  0.000E+00  0.000E+00  0.000E+00  6.607E-01  2.648E+00  0.000E+00   0.0E+00
   60   77  3.473E+02  0.000E+00  0.000E+00  0.000E+00  4.571E-02  6.115E-01  0.000E+00   0.0E+00
   60   78  3.153E+02  1.232E+05  1.837E-06  7.629E-06  0.000E+00  0.000E+00  3.165E-03   7.4E-01
   60   79  3.133E+02  2.795E+07  2.057E-04  8.485E-04  0.000E+00  0.000E+00  1.565E-03   1.1E+00
   60   80  3.059E+02  0.000E+00  0.000E+00  0.000E+00  9.667E+01  1.096E+00  0.000E+00   0.0E+00
   60   81  2.252E+02  1.660E+05  6.312E-07  1.872E-06  0.000E+00  0.000E+00  1.718E+00   1.4E-02
   60   82  2.231E+02  2.980E+06  2.224E-05  6.532E-05  0.000E+00  0.000E+00  1.388E+00   3.5E-01
   60   84  2.192E+02  4.536E+05  4.901E-06  1.415E-05  0.000E+00  0.000E+00  8.905E-01   2.7E-01
   60   85  2.172E+02  0.000E+00  0.000E+00  0.000E+00  0.000E+00  0.000E+00  1.916E+00   0.0E+00
   60   86  2.130E+02  1.281E+07  1.308E-04  3.668E-04  0.000E+00  0.000E+00  1.753E+00   1.3E-01
   60   87  2.094E+02  6.511E+07  4.279E-04  1.180E-03  0.000E+00  0.000E+00  7.924E-01   3.7E-01
   60   88  2.065E+02  0.000E+00  0.000E+00  0.000E+00  0.000E+00  0.000E+00  4.685E-01   0.0E+00
   60   89  2.035E+02  0.000E+00  0.000E+00  0.000E+00  5.217E+00  9.215E-01  0.000E+00   0.0E+00
   60   90  2.014E+02  6.871E+07  2.089E-04  5.541E-04  0.000E+00  0.000E+00  6.956E-01   7.0E-01
   60   91  2.005E+02  0.000E+00  0.000E+00  0.000E+00  4.008E+00  1.617E-03  0.000E+00   0.0E+00
   60   92  2.005E+02  1.400E+07  1.265E-04  3.340E-04  0.000E+00  0.000E+00  4.419E-01   3.6E-01
   60   93  1.998E+02  1.321E+05  7.908E-07  2.081E-06  0.000E+00  0.000E+00  1.211E+00   3.0E-04
   60   94  1.996E+02  0.000E+00  0.000E+00  0.000E+00  0.000E+00  0.000E+00  1.369E+00   0.0E+00
   60   95  1.980E+02  1.939E+07  1.710E-04  4.459E-04  0.000E+00  0.000E+00  1.351E+00   3.2E-01
   60   96  1.957E+02  0.000E+00  0.000E+00  0.000E+00  4.642E+02  9.649E-01  0.000E+00   0.0E+00
   60   97  1.943E+02  0.000E+00  0.000E+00  0.000E+00  1.001E+02  1.774E-01  0.000E+00   0.0E+00
   60   98  1.941E+02  1.250E+08  7.062E-04  1.805E-03  0.000E+00  0.000E+00  2.562E-01   1.3E+00
   60   99  1.910E+02  8.922E+07  7.319E-04  1.841E-03  0.000E+00  0.000E+00  9.776E-06   1.0E+00
   60  100  1.867E+02  0.000E+00  0.000E+00  0.000E+00  3.199E+03  9.386E-02  0.000E+00   0.0E+00
   60  101  1.847E+02  2.998E+08  7.667E-04  1.865E-03  0.000E+00  0.000E+00  1.299E-01   3.0E-02
   60  102  1.783E+02  1.408E+08  6.710E-04  1.575E-03  0.000E+00  0.000E+00  1.507E-01   1.4E-01
   61   62  5.618E+03  0.000E+00  0.000E+00  0.000E+00  3.296E-04  1.263E+02  0.000E+00   0.0E+00
   61   63  3.011E+03  0.000E+00  0.000E+00  0.000E+00  1.112E-02  0.000E+00  0.000E+00   0.0E+00
   61   64  1.811E+03  0.000E+00  0.000E+00  0.000E+00  7.364E-03  2.941E+02  0.000E+00   0.0E+00
   61   65  1.294E+03  0.000E+00  0.000E+00  0.000E+00  2.249E-02  0.000E+00  0.000E+00   0.0E+00
   61   66  6.190E+02  1.455E+09  5.572E-02  6.813E-01  0.000E+00  0.000E+00  1.661E-01   8.8E-01
   61   67  5.355E+02  3.224E+09  1.848E-01  1.955E+00  0.000E+00  0.000E+00  4.062E-01   1.2E+00
   61   68  5.326E+02  2.030E+09  8.636E-02  9.086E-01  0.000E+00  0.000E+00  2.388E-02   1.0E+00
   61   69  5.058E+02  4.342E+08  1.110E-02  1.109E-01  0.000E+00  0.000E+00  3.025E-01   9.8E-01
   61   70  4.812E+02  1.580E+09  5.486E-02  5.215E-01  0.000E+00  0.000E+00  1.145E+00   8.3E-01
   61   71  4.805E+02  0.000E+00  0.000E+00  0.000E+00  0.000E+00  0.000E+00  3.585E-01   0.0E+00
   61   72  4.562E+02  2.049E+07  4.263E-04  3.842E-03  0.000E+00  0.000E+00  7.067E-01   3.7E-01
   61   73  4.479E+02  3.007E+08  9.042E-03  7.999E-02  0.000E+00  0.000E+00  1.172E-03   5.0E-01
   61   74  4.423E+02  0.000E+00  0.000E+00  0.000E+00  0.000E+00  0.000E+00  4.611E-01   0.0E+00
   61   75  4.415E+02  7.023E+08  1.368E-02  1.193E-01  0.000E+00  0.000E+00  3.726E-01   7.9E-01
   61   76  4.290E+02  0.000E+00  0.000E+00  0.000E+00  0.000E+00  0.000E+00  1.043E+00   0.0E+00
   61   77  4.116E+02  1.291E+08  2.186E-03  1.777E-02  0.000E+00  0.000E+00  3.333E-02   6.8E-01
   61   78  3.674E+02  0.000E+00  0.000E+00  0.000E+00  6.100E-01  2.108E+03  0.000E+00   0.0E+00
   61   79  3.647E+02  0.000E+00  0.000E+00  0.000E+00  3.201E-01  0.000E+00  0.000E+00   0.0E+00
   61   80  3.548E+02  0.000E+00  0.000E+00  0.000E+00  0.000E+00  0.000E+00  2.785E+00   0.0E+00
   61   81  2.506E+02  0.000E+00  0.000E+00  0.000E+00  1.073E+05  0.000E+00  0.000E+00   0.0E+00
   61   82  2.480E+02  0.000E+00  0.000E+00  0.000E+00  9.842E+04  6.080E+00  0.000E+00   0.0E+00
   61   83  2.449E+02  0.000E+00  0.000E+00  0.000E+00  1.162E+05  0.000E+00  0.000E+00   0.0E+00
   61   84  2.432E+02  0.000E+00  0.000E+00  0.000E+00  8.776E+04  1.615E-02  0.000E+00   0.0E+00
   61   85  2.408E+02  0.000E+00  0.000E+00  0.000E+00  8.935E+04  4.169E-02  0.000E+00   0.0E+00
   61   86  2.356E+02  0.000E+00  0.000E+00  0.000E+00  2.017E+04  3.032E-02  0.000E+00   0.0E+00
   61   87  2.311E+02  0.000E+00  0.000E+00  0.000E+00  9.336E+03  3.038E-01  0.000E+00   0.0E+00
   61   88  2.276E+02  0.000E+00  0.000E+00  0.000E+00  4.323E+04  3.338E-01  0.000E+00   0.0E+00
   61   89  2.240E+02  6.944E+03  3.482E-08  1.541E-07  0.000E+00  0.000E+00  2.444E-02   4.5E+00
   61   90  2.215E+02  0.000E+00  0.000E+00  0.000E+00  7.871E+03  0.000E+00  0.000E+00   0.0E+00
   61   91  2.203E+02  2.892E+05  2.104E-06  9.159E-06  0.000E+00  0.000E+00  4.739E-02   5.0E-02
   61   92  2.203E+02  0.000E+00  0.000E+00  0.000E+00  3.155E+04  3.137E-01  0.000E+00   0.0E+00
   61   93  2.195E+02  0.000E+00  0.000E+00  0.000E+00  1.959E+04  2.406E+00  0.000E+00   0.0E+00
   61   94  2.192E+02  0.000E+00  0.000E+00  0.000E+00  1.045E+04  2.657E-01  0.000E+00   0.0E+00
   61   95  2.174E+02  0.000E+00  0.000E+00  0.000E+00  9.116E+01  1.286E-01  0.000E+00   0.0E+00
   61   96  2.145E+02  0.000E+00  0.000E+00  0.000E+00  0.000E+00  0.000E+00  4.410E-02   0.0E+00
   61   97  2.129E+02  4.043E+06  1.832E-05  7.706E-05  0.000E+00  0.000E+00  7.716E-02   6.7E-01
   61   98  2.127E+02  0.000E+00  0.000E+00  0.000E+00  4.734E+02  4.391E-02  0.000E+00   0.0E+00
   61   99  2.089E+02  0.000E+00  0.000E+00  0.000E+00  1.704E+03  2.105E-01  0.000E+00   0.0E+00
   61  100  2.038E+02  0.000E+00  0.000E+00  0.000E+00  0.000E+00  0.000E+00  9.342E+00   0.0E+00
   61  101  2.015E+02  0.000E+00  0.000E+00  0.000E+00  6.896E+01  0.000E+00  0.000E+00   0.0E+00
   61  102  1.938E+02  0.000E+00  0.000E+00  0.000E+00  5.202E+01  8.136E+00  0.000E+00   0.0E+00
   62   63  6.488E+03  0.000E+00  0.000E+00  0.000E+00  1.931E-05  1.569E+02  0.000E+00   0.0E+00
   62   64  2.674E+03  0.000E+00  0.000E+00  0.000E+00  1.732E-03  5.721E+01  0.000E+00   0.0E+00
   62   65  1.681E+03  0.000E+00  0.000E+00  0.000E+00  1.302E-02  4.763E-01  0.000E+00   0.0E+00
   62   66  6.956E+02  1.943E+08  1.409E-02  1.291E-01  0.000E+00  0.000E+00  6.116E-03   9.0E-01
   62   67  5.919E+02  0.000E+00  0.000E+00  0.000E+00  0.000E+00  0.000E+00  1.727E-01   0.0E+00
   62   68  5.884E+02  7.952E+08  6.192E-02  4.798E-01  0.000E+00  0.000E+00  3.761E-02   1.4E+00
   62   69  5.558E+02  2.271E+09  1.052E-01  7.701E-01  0.000E+00  0.000E+00  7.455E-04   1.1E+00
   62   70  5.263E+02  1.052E+09  6.556E-02  4.544E-01  0.000E+00  0.000E+00  1.664E-01   9.0E-01
   62   71  5.255E+02  1.930E+09  3.994E-02  2.763E-01  0.000E+00  0.000E+00  9.322E-02   9.9E-01
   62   72  4.966E+02  1.779E+05  6.575E-06  4.300E-05  0.000E+00  0.000E+00  3.956E-02   6.2E+01
   62   73  4.866E+02  1.595E+09  8.495E-02  5.444E-01  0.000E+00  0.000E+00  4.512E-01   1.0E+00
   62   74  4.801E+02  1.839E+09  3.177E-02  2.009E-01  0.000E+00  0.000E+00  1.448E-01   7.4E-01
   62   75  4.792E+02  1.646E+08  5.666E-03  3.575E-02  0.000E+00  0.000E+00  9.505E-01   6.7E-01
   62   76  4.644E+02  8.607E+07  1.392E-03  8.510E-03  0.000E+00  0.000E+00  8.435E-01   8.3E-01
   62   77  4.442E+02  3.212E+06  9.501E-05  5.557E-04  0.000E+00  0.000E+00  1.025E-01   4.2E+00
   62   78  3.931E+02  0.000E+00  0.000E+00  0.000E+00  7.377E-02  1.045E+03  0.000E+00   0.0E+00
   62   79  3.900E+02  0.000E+00  0.000E+00  0.000E+00  1.229E-01  2.665E+02  0.000E+00   0.0E+00
   62   80  3.787E+02  2.910E+08  3.127E-03  1.559E-02  0.000E+00  0.000E+00  6.374E-01   7.7E-01
   62   81  2.623E+02  0.000E+00  0.000E+00  0.000E+00  3.644E+03  3.702E+00  0.000E+00   0.0E+00
   62   82  2.594E+02  0.000E+00  0.000E+00  0.000E+00  1.347E+04  7.404E-01  0.000E+00   0.0E+00
   62   84  2.542E+02  0.000E+00  0.000E+00  0.000E+00  1.972E+04  1.737E+00  0.000E+00   0.0E+00
   62   85  2.515E+02  0.000E+00  0.000E+00  0.000E+00  3.010E+04  0.000E+00  0.000E+00   0.0E+00
   62   86  2.459E+02  0.000E+00  0.000E+00  0.000E+00  9.416E+04  2.646E-05  0.000E+00   0.0E+00
   62   87  2.411E+02  0.000E+00  0.000E+00  0.000E+00  8.002E+04  5.005E-03  0.000E+00   0.0E+00
   62   88  2.372E+02  0.000E+00  0.000E+00  0.000E+00  7.947E+04  0.000E+00  0.000E+00   0.0E+00
   62   89  2.333E+02  2.433E+06  1.985E-05  6.099E-05  0.000E+00  0.000E+00  5.946E-02   1.3E+00
   62   90  2.306E+02  0.000E+00  0.000E+00  0.000E+00  1.530E+05  1.729E+00  0.000E+00   0.0E+00
   62   91  2.293E+02  5.108E+06  6.040E-05  1.824E-04  0.000E+00  0.000E+00  3.913E-02   2.0E+00
   62   92  2.293E+02  0.000E+00  0.000E+00  0.000E+00  2.619E+02  4.059E-02  0.000E+00   0.0E+00
   62   93  2.284E+02  0.000E+00  0.000E+00  0.000E+00  3.915E+04  1.729E-01  0.000E+00   0.0E+00
   62   94  2.281E+02  0.000E+00  0.000E+00  0.000E+00  2.290E+04  0.000E+00  0.000E+00   0.0E+00
   62   95  2.262E+02  0.000E+00  0.000E+00  0.000E+00  1.498E-01  1.857E-01  0.000E+00   0.0E+00
   62   96  2.231E+02  4.182E+05  1.560E-06  4.582E-06  0.000E+00  0.000E+00  7.433E-02   2.1E+00
   62   97  2.213E+02  5.134E+06  3.770E-05  1.099E-04  0.000E+00  0.000E+00  2.895E-03   1.2E+00
   62   98  2.211E+02  0.000E+00  0.000E+00  0.000E+00  7.297E+01  2.418E-01  0.000E+00   0.0E+00
   62   99  2.170E+02  0.000E+00  0.000E+00  0.000E+00  8.907E+01  2.699E-02  0.000E+00   0.0E+00
   62  100  2.114E+02  6.042E+08  2.025E-03  5.638E-03  0.000E+00  0.000E+00  3.404E-01   6.9E-01
   62  101  2.089E+02  0.000E+00  0.000E+00  0.000E+00  7.071E+03  6.927E-01  0.000E+00   0.0E+00
   62  102  2.008E+02  0.000E+00  0.000E+00  0.000E+00  3.902E+03  4.865E+00  0.000E+00   0.0E+00
   63   64  4.547E+03  0.000E+00  0.000E+00  0.000E+00  2.979E-05  6.562E+00  0.000E+00   0.0E+00
   63   65  2.269E+03  0.000E+00  0.000E+00  0.000E+00  0.000E+00  1.999E+02  0.000E+00   0.0E+00
   63   66  7.792E+02  5.006E+07  9.112E-03  4.675E-02  0.000E+00  0.000E+00  3.170E-04   1.1E+00
   63   68  6.471E+02  0.000E+00  0.000E+00  0.000E+00  0.000E+00  0.000E+00  9.805E-03   0.0E+00
   63   69  6.079E+02  1.326E+08  1.469E-02  5.880E-02  0.000E+00  0.000E+00  1.361E-02   1.9E+00
   63   70  5.728E+02  0.000E+00  0.000E+00  0.000E+00  0.000E+00  0.000E+00  1.047E-04   0.0E+00
   63   71  5.718E+02  1.131E+09  5.544E-02  2.087E-01  0.000E+00  0.000E+00  0.000E+00   1.3E+00
   63   72  5.377E+02  9.052E+08  7.848E-02  2.779E-01  0.000E+00  0.000E+00  3.702E-02   1.0E+00
   63   73  5.261E+02  0.000E+00  0.000E+00  0.000E+00  0.000E+00  0.000E+00  2.936E-01   0.0E+00
   63   74  5.185E+02  1.926E+09  7.762E-02  2.650E-01  0.000E+00  0.000E+00  0.000E+00   1.0E+00
   63   75  5.174E+02  1.732E+09  1.391E-01  4.737E-01  0.000E+00  0.000E+00  1.233E-02   8.9E-01
   63   76  5.002E+02  7.570E+07  2.840E-03  9.353E-03  0.000E+00  0.000E+00  0.000E+00   7.3E-01
   63   77  4.768E+02  5.366E+08  3.658E-02  1.148E-01  0.000E+00  0.000E+00  1.104E+00   9.3E-01
   63   78  4.185E+02  0.000E+00  0.000E+00  0.000E+00  6.877E-02  2.351E+02  0.000E+00   0.0E+00
   63   79  4.150E+02  0.000E+00  0.000E+00  0.000E+00  0.000E+00  1.787E+03  0.000E+00   0.0E+00
   63   80  4.021E+02  8.802E+07  2.134E-03  5.650E-03  0.000E+00  0.000E+00  0.000E+00   7.6E-01
   63   81  2.734E+02  0.000E+00  0.000E+00  0.000E+00  0.000E+00  6.072E-01  0.000E+00   0.0E+00
   63   82  2.702E+02  0.000E+00  0.000E+00  0.000E+00  1.289E+03  8.581E-01  0.000E+00   0.0E+00
   63   84  2.645E+02  0.000E+00  0.000E+00  0.000E+00  1.083E+04  0.000E+00  0.000E+00   0.0E+00
   63   86  2.556E+02  0.000E+00  0.000E+00  0.000E+00  3.350E+03  0.000E+00  0.000E+00   0.0E+00
   63   87  2.504E+02  0.000E+00  0.000E+00  0.000E+00  3.168E+04  1.027E-02  0.000E+00   0.0E+00
   63   89  2.420E+02  1.660E+06  2.914E-05  4.643E-05  0.000E+00  0.000E+00  5.848E-02   2.1E+00
   63   90  2.391E+02  0.000E+00  0.000E+00  0.000E+00  0.000E+00  2.934E-01  0.000E+00   0.0E+00
   63   91  2.377E+02  0.000E+00  0.000E+00  0.000E+00  0.000E+00  0.000E+00  9.936E-03   0.0E+00
   63   92  2.377E+02  0.000E+00  0.000E+00  0.000E+00  1.116E+05  0.000E+00  0.000E+00   0.0E+00
   63   93  2.368E+02  0.000E+00  0.000E+00  0.000E+00  9.362E+04  7.781E-03  0.000E+00   0.0E+00
   63   95  2.343E+02  0.000E+00  0.000E+00  0.000E+00  2.642E+03  0.000E+00  0.000E+00   0.0E+00
   63   96  2.310E+02  2.584E+06  2.067E-05  3.144E-05  0.000E+00  0.000E+00  0.000E+00   5.6E-01
   63   97  2.291E+02  1.325E+06  2.086E-05  3.147E-05  0.000E+00  0.000E+00  7.138E-03   2.0E+00
   63   98  2.289E+02  0.000E+00  0.000E+00  0.000E+00  5.929E+00  2.318E-01  0.000E+00   0.0E+00
   63   99  2.245E+02  0.000E+00  0.000E+00  0.000E+00  2.962E+03  0.000E+00  0.000E+00   0.0E+00
   63  100  2.186E+02  1.163E+08  8.332E-04  1.199E-03  0.000E+00  0.000E+00  0.000E+00   6.7E-01
   63  101  2.159E+02  0.000E+00  0.000E+00  0.000E+00  0.000E+00  9.520E+00  0.000E+00   0.0E+00
   63  102  2.072E+02  0.000E+00  0.000E+00  0.000E+00  1.942E+03  3.078E+00  0.000E+00   0.0E+00
   64   65  4.527E+03  0.000E+00  0.000E+00  0.000E+00  6.830E-04  1.987E+02  0.000E+00   0.0E+00
   64   66  9.403E+02  3.995E+06  5.295E-04  6.557E-03  0.000E+00  0.000E+00  1.008E-02   8.4E-01
   64   67  7.602E+02  0.000E+00  0.000E+00  0.000E+00  0.000E+00  0.000E+00  7.349E-02   0.0E+00
   64   68  7.545E+02  5.255E+07  6.727E-03  6.684E-02  0.000E+00  0.000E+00  4.075E-04   8.9E-01
   64   69  7.018E+02  2.786E+07  2.057E-03  1.901E-02  0.000E+00  0.000E+00  2.195E-02   7.1E-01
   64   70  6.553E+02  5.725E+08  5.530E-02  4.772E-01  0.000E+00  0.000E+00  8.889E-02   1.2E+00
   64   71  6.540E+02  4.407E+06  1.413E-04  1.217E-03  0.000E+00  0.000E+00  4.791E-03   1.5E+00
   64   72  6.098E+02  1.395E+09  7.780E-02  6.248E-01  0.000E+00  0.000E+00  2.040E-02   9.5E-01
   64   73  5.950E+02  1.334E+09  1.062E-01  8.319E-01  0.000E+00  0.000E+00  1.146E-01   1.1E+00
   64   74  5.852E+02  6.797E+04  1.745E-06  1.345E-05  0.000E+00  0.000E+00  8.720E-02   1.1E+01
   64   75  5.838E+02  6.405E+08  3.273E-02  2.516E-01  0.000E+00  0.000E+00  9.819E-02   9.6E-01
   64   76  5.620E+02  1.602E+09  3.794E-02  2.808E-01  0.000E+00  0.000E+00  1.052E-01   8.7E-01
   64   77  5.327E+02  9.250E+06  3.935E-04  2.760E-03  0.000E+00  0.000E+00  6.149E-02   8.5E-02
   64   78  4.609E+02  0.000E+00  0.000E+00  0.000E+00  3.892E+00  5.063E+01  0.000E+00   0.0E+00
   64   79  4.566E+02  0.000E+00  0.000E+00  0.000E+00  1.163E+01  2.288E+03  0.000E+00   0.0E+00
   64   80  4.411E+02  1.551E+09  2.262E-02  1.314E-01  0.000E+00  0.000E+00  5.110E-01   7.3E-01
   64   81  2.909E+02  0.000E+00  0.000E+00  0.000E+00  1.011E+02  2.592E-01  0.000E+00   0.0E+00
   64   82  2.873E+02  0.000E+00  0.000E+00  0.000E+00  2.613E+02  9.314E-01  0.000E+00   0.0E+00
   64   84  2.809E+02  0.000E+00  0.000E+00  0.000E+00  1.087E+02  7.497E-01  0.000E+00   0.0E+00
   64   85  2.776E+02  0.000E+00  0.000E+00  0.000E+00  6.805E+01  0.000E+00  0.000E+00   0.0E+00
   64   86  2.708E+02  0.000E+00  0.000E+00  0.000E+00  5.378E+01  6.140E-01  0.000E+00   0.0E+00
   64   87  2.650E+02  0.000E+00  0.000E+00  0.000E+00  9.932E+00  1.194E-01  0.000E+00   0.0E+00
   64   88  2.603E+02  0.000E+00  0.000E+00  0.000E+00  1.895E+04  0.000E+00  0.000E+00   0.0E+00
   64   89  2.556E+02  2.547E+07  2.495E-04  8.397E-04  0.000E+00  0.000E+00  1.535E-02   1.6E+00
   64   90  2.523E+02  0.000E+00  0.000E+00  0.000E+00  1.539E+03  1.745E-01  0.000E+00   0.0E+00
   64   91  2.508E+02  1.287E+08  1.821E-03  6.015E-03  0.000E+00  0.000E+00  1.213E-02   1.5E+00
   64   92  2.508E+02  0.000E+00  0.000E+00  0.000E+00  1.282E+03  2.610E+00  0.000E+00   0.0E+00
   64   93  2.498E+02  0.000E+00  0.000E+00  0.000E+00  1.067E+02  2.699E-03  0.000E+00   0.0E+00
   64   94  2.494E+02  0.000E+00  0.000E+00  0.000E+00  9.417E+04  0.000E+00  0.000E+00   0.0E+00
   64   95  2.471E+02  0.000E+00  0.000E+00  0.000E+00  1.109E+05  1.941E-01  0.000E+00   0.0E+00
   64   96  2.434E+02  4.955E+05  2.200E-06  7.049E-06  0.000E+00  0.000E+00  7.598E-02   1.2E+01
   64   97  2.413E+02  2.930E+06  2.558E-05  8.128E-05  0.000E+00  0.000E+00  4.600E-02   6.1E+00
   64   98  2.410E+02  0.000E+00  0.000E+00  0.000E+00  1.059E+05  2.013E+00  0.000E+00   0.0E+00
   64   99  2.362E+02  0.000E+00  0.000E+00  0.000E+00  6.218E+03  2.766E-02  0.000E+00   0.0E+00
   64  100  2.296E+02  7.073E+09  2.795E-02  8.450E-02  0.000E+00  0.000E+00  2.582E+00   7.0E-01
   64  101  2.267E+02  0.000E+00  0.000E+00  0.000E+00  1.969E+05  1.358E+01  0.000E+00   0.0E+00
   64  102  2.171E+02  0.000E+00  0.000E+00  0.000E+00  5.547E+04  1.377E-04  0.000E+00   0.0E+00
   65   66  1.187E+03  1.943E+05  8.205E-05  6.411E-04  0.000E+00  0.000E+00  1.358E-03   1.2E+00
   65   68  9.054E+02  0.000E+00  0.000E+00  0.000E+00  0.000E+00  0.000E+00  1.799E-03   0.0E+00
   65   69  8.305E+02  4.958E+06  1.025E-03  5.607E-03  0.000E+00  0.000E+00  1.514E-05   1.1E+00
   65   70  7.663E+02  0.000E+00  0.000E+00  0.000E+00  0.000E+00  0.000E+00  9.066E-06   0.0E+00
   65   71  7.644E+02  2.786E+06  2.441E-04  1.229E-03  0.000E+00  0.000E+00  0.000E+00   2.3E-01
   65   72  7.048E+02  2.692E+07  4.010E-03  1.861E-02  0.000E+00  0.000E+00  1.079E-02   7.2E-01
   65   73  6.850E+02  0.000E+00  0.000E+00  0.000E+00  0.000E+00  0.000E+00  8.141E-02   0.0E+00
   65   74  6.721E+02  1.208E+08  8.179E-03  3.619E-02  0.000E+00  0.000E+00  0.000E+00   1.0E+00
   65   75  6.703E+02  1.557E+08  2.097E-02  9.253E-02  0.000E+00  0.000E+00  7.042E-02   1.3E+00
   65   76  6.417E+02  5.923E+08  3.656E-02  1.545E-01  0.000E+00  0.000E+00  0.000E+00   9.8E-01
   65   77  6.037E+02  1.842E+09  2.013E-01  8.001E-01  0.000E+00  0.000E+00  1.797E-01   1.1E+00
   65   78  5.132E+02  0.000E+00  0.000E+00  0.000E+00  5.606E-01  1.020E+03  0.000E+00   0.0E+00
   65   79  5.078E+02  0.000E+00  0.000E+00  0.000E+00  0.000E+00  3.210E+01  0.000E+00   0.0E+00
   65   80  4.888E+02  2.047E+09  7.332E-02  2.360E-01  0.000E+00  0.000E+00  0.000E+00   8.0E-01
   65   81  3.108E+02  0.000E+00  0.000E+00  0.000E+00  0.000E+00  3.100E+00  0.000E+00   0.0E+00
   65   82  3.068E+02  0.000E+00  0.000E+00  0.000E+00  3.008E+01  7.075E-02  0.000E+00   0.0E+00
   65   84  2.995E+02  0.000E+00  0.000E+00  0.000E+00  3.599E+01  0.000E+00  0.000E+00   0.0E+00
   65   86  2.881E+02  0.000E+00  0.000E+00  0.000E+00  5.453E+01  0.000E+00  0.000E+00   0.0E+00
   65   87  2.814E+02  0.000E+00  0.000E+00  0.000E+00  3.415E+01  1.145E-01  0.000E+00   0.0E+00
   65   89  2.709E+02  1.128E+08  2.481E-03  4.425E-03  0.000E+00  0.000E+00  3.798E-03   1.6E+00
   65   90  2.672E+02  0.000E+00  0.000E+00  0.000E+00  0.000E+00  6.145E-01  0.000E+00   0.0E+00
   65   91  2.655E+02  0.000E+00  0.000E+00  0.000E+00  0.000E+00  0.000E+00  4.515E-02   0.0E+00
   65   92  2.656E+02  0.000E+00  0.000E+00  0.000E+00  2.744E+03  0.000E+00  0.000E+00   0.0E+00
   65   93  2.644E+02  0.000E+00  0.000E+00  0.000E+00  6.480E+02  1.965E+00  0.000E+00   0.0E+00
   65   95  2.613E+02  0.000E+00  0.000E+00  0.000E+00  4.127E+03  0.000E+00  0.000E+00   0.0E+00
   65   96  2.572E+02  3.593E+07  3.563E-04  6.033E-04  0.000E+00  0.000E+00  0.000E+00   1.7E+00
   65   97  2.549E+02  2.080E+07  4.053E-04  6.801E-04  0.000E+00  0.000E+00  5.916E-02   1.5E+00
   65   98  2.545E+02  0.000E+00  0.000E+00  0.000E+00  1.985E+04  1.537E-01  0.000E+00   0.0E+00
   65   99  2.492E+02  0.000E+00  0.000E+00  0.000E+00  1.069E+05  0.000E+00  0.000E+00   0.0E+00
   65  100  2.419E+02  3.721E+09  3.263E-02  5.197E-02  0.000E+00  0.000E+00  0.000E+00   6.9E-01
   65  101  2.386E+02  0.000E+00  0.000E+00  0.000E+00  0.000E+00  2.493E-02  0.000E+00   0.0E+00
   65  102  2.280E+02  0.000E+00  0.000E+00  0.000E+00  1.462E+05  2.394E+00  0.000E+00   0.0E+00
   66   67  3.970E+03  0.000E+00  0.000E+00  0.000E+00  7.425E-02  0.000E+00  0.000E+00   0.0E+00
   66   68  3.819E+03  0.000E+00  0.000E+00  0.000E+00  3.617E-02  9.522E+00  0.000E+00   0.0E+00
   66   69  2.767E+03  0.000E+00  0.000E+00  0.000E+00  7.928E-02  1.792E+01  0.000E+00   0.0E+00
   66   70  2.163E+03  0.000E+00  0.000E+00  0.000E+00  2.204E-02  5.815E+01  0.000E+00   0.0E+00
   66   71  2.148E+03  0.000E+00  0.000E+00  0.000E+00  2.008E-01  1.427E+02  0.000E+00   0.0E+00
   66   72  1.736E+03  0.000E+00  0.000E+00  0.000E+00  1.659E-01  3.061E+00  0.000E+00   0.0E+00
   66   73  1.620E+03  0.000E+00  0.000E+00  0.000E+00  2.938E-01  5.894E+01  0.000E+00   0.0E+00
   66   74  1.550E+03  0.000E+00  0.000E+00  0.000E+00  2.018E-01  4.891E+02  0.000E+00   0.0E+00
   66   75  1.540E+03  0.000E+00  0.000E+00  0.000E+00  1.283E-03  7.401E+01  0.000E+00   0.0E+00
   66   76  1.397E+03  0.000E+00  0.000E+00  0.000E+00  6.041E-03  1.854E+02  0.000E+00   0.0E+00
   66   77  1.229E+03  0.000E+00  0.000E+00  0.000E+00  2.332E-01  3.447E+01  0.000E+00   0.0E+00
   66   78  9.042E+02  2.030E+04  2.488E-06  2.962E-05  0.000E+00  0.000E+00  4.126E-05   6.4E-01
   66   79  8.877E+02  1.118E+04  6.601E-07  7.717E-06  0.000E+00  0.000E+00  2.543E-04   1.8E-01
   66   80  8.310E+02  0.000E+00  0.000E+00  0.000E+00  5.701E-05  3.108E+01  0.000E+00   0.0E+00
   66   81  4.211E+02  4.698E+09  6.245E-02  3.463E-01  0.000E+00  0.000E+00  2.152E-01   1.0E+00
   66   82  4.137E+02  4.006E+09  1.028E-01  5.601E-01  0.000E+00  0.000E+00  5.363E-01   1.0E+00
   66   84  4.005E+02  2.800E+09  1.010E-01  5.327E-01  0.000E+00  0.000E+00  3.455E-01   9.9E-01
   66   85  3.940E+02  0.000E+00  0.000E+00  0.000E+00  0.000E+00  0.000E+00  8.420E-02   0.0E+00
   66   86  3.804E+02  2.968E+07  9.658E-04  4.838E-03  0.000E+00  0.000E+00  2.415E-01   6.9E-01
   66   87  3.689E+02  6.037E+05  1.232E-05  5.983E-05  0.000E+00  0.000E+00  3.838E-01   3.1E+00
   66   88  3.600E+02  0.000E+00  0.000E+00  0.000E+00  0.000E+00  0.000E+00  2.542E-01   0.0E+00
   66   89  3.510E+02  0.000E+00  0.000E+00  0.000E+00  1.113E-01  7.281E+01  0.000E+00   0.0E+00
   66   90  3.449E+02  4.417E+06  3.938E-05  1.788E-04  0.000E+00  0.000E+00  2.098E+00   1.5E+00
   66   91  3.421E+02  0.000E+00  0.000E+00  0.000E+00  1.406E-01  1.177E+01  0.000E+00   0.0E+00
   66   92  3.421E+02  1.104E+07  2.905E-04  1.309E-03  0.000E+00  0.000E+00  5.846E-01   4.3E-01
[truncated: 56,645 more chars]
