# Supplementary material
Source: MDPI journal article supplement (https://www.mdpi.com/2218-2004/6/2/25)
Supplement: s1 [file s1 › atom-kma/tab5.dat]

Table 5. Transition wavelengths (Lambda_ij in Angstrom), radiative rates (A_ji in sec-1), oscillator 
         strengths (f_ij, dimensionless), and line strengths (S, in atomic units) for electric 
         dipole (E1), and A_ji for E2, M1 and M2 transitions in Sc XII. I and J are the lower and
         upper levels of a transition -- see Table 2 for their definitions.
    
    I    J  Lambda     A (E1)     f (E1)     S (E1)     A (E2)     A (M1)     A (M2)      R (E1)
    1    2  3.101E+01  0.000E+00  0.000E+00  0.000E+00  0.000E+00  0.000E+00  2.241E+04   0.0E+00
    1    3  3.091E+01  2.365E+11  1.017E-01  1.035E-02  0.000E+00  0.000E+00  0.000E+00   9.4E-01
    1    5  3.058E+01  3.359E+11  1.412E-01  1.422E-02  0.000E+00  0.000E+00  0.000E+00   9.4E-01
    1    6  2.949E+01  0.000E+00  0.000E+00  0.000E+00  0.000E+00  8.085E+03  0.000E+00   0.0E+00
    1    7  2.926E+01  0.000E+00  0.000E+00  0.000E+00  7.312E+07  0.000E+00  0.000E+00   0.0E+00
    1    9  2.917E+01  0.000E+00  0.000E+00  0.000E+00  0.000E+00  1.521E+03  0.000E+00   0.0E+00
    1   10  2.911E+01  0.000E+00  0.000E+00  0.000E+00  9.485E+07  0.000E+00  0.000E+00   0.0E+00
    1   11  2.895E+01  0.000E+00  0.000E+00  0.000E+00  0.000E+00  4.143E+00  0.000E+00   0.0E+00
    1   13  2.885E+01  0.000E+00  0.000E+00  0.000E+00  0.000E+00  1.699E+04  0.000E+00   0.0E+00
    1   14  2.886E+01  0.000E+00  0.000E+00  0.000E+00  1.167E+08  0.000E+00  0.000E+00   0.0E+00
    1   17  2.733E+01  2.044E+10  6.865E-03  6.176E-04  0.000E+00  0.000E+00  0.000E+00   9.8E-01
    1   18  2.727E+01  0.000E+00  0.000E+00  0.000E+00  0.000E+00  0.000E+00  5.992E+05   0.0E+00
    1   21  2.715E+01  0.000E+00  0.000E+00  0.000E+00  0.000E+00  0.000E+00  6.530E+04   0.0E+00
    1   23  2.698E+01  7.276E+11  2.381E-01  2.115E-02  0.000E+00  0.000E+00  0.000E+00   9.8E-01
    1   24  2.692E+01  0.000E+00  0.000E+00  0.000E+00  0.000E+00  0.000E+00  6.344E+04   0.0E+00
    1   25  2.689E+01  0.000E+00  0.000E+00  0.000E+00  0.000E+00  0.000E+00  1.704E+03   0.0E+00
    1   27  2.657E+01  7.503E+12  2.382E+00  2.084E-01  0.000E+00  0.000E+00  0.000E+00   9.8E-01
    1   28  2.491E+01  0.000E+00  0.000E+00  0.000E+00  0.000E+00  1.295E+03  0.000E+00   0.0E+00
    1   31  2.380E+01  4.824E+10  1.229E-02  9.625E-04  0.000E+00  0.000E+00  0.000E+00   9.9E-01
    1   32  2.377E+01  0.000E+00  0.000E+00  0.000E+00  0.000E+00  0.000E+00  8.775E+04   0.0E+00
    1   33  2.369E+01  1.114E+12  2.813E-01  2.194E-02  0.000E+00  0.000E+00  0.000E+00   1.0E+00
    1   34  2.311E+01  0.000E+00  0.000E+00  0.000E+00  0.000E+00  0.000E+00  6.187E+03   0.0E+00
    1   35  2.310E+01  8.909E+10  2.138E-02  1.626E-03  0.000E+00  0.000E+00  0.000E+00   8.2E-01
    1   37  2.291E+01  6.570E+10  1.551E-02  1.170E-03  0.000E+00  0.000E+00  0.000E+00   8.3E-01
    1   38  2.276E+01  0.000E+00  0.000E+00  0.000E+00  0.000E+00  6.454E+03  0.000E+00   0.0E+00
    1   39  2.274E+01  0.000E+00  0.000E+00  0.000E+00  8.428E+07  0.000E+00  0.000E+00   0.0E+00
    1   41  2.271E+01  0.000E+00  0.000E+00  0.000E+00  0.000E+00  1.889E+02  0.000E+00   0.0E+00
    1   42  2.270E+01  0.000E+00  0.000E+00  0.000E+00  8.206E+07  0.000E+00  0.000E+00   0.0E+00
    1   44  2.257E+01  0.000E+00  0.000E+00  0.000E+00  0.000E+00  4.896E+01  0.000E+00   0.0E+00
    1   45  2.254E+01  0.000E+00  0.000E+00  0.000E+00  1.516E+08  0.000E+00  0.000E+00   0.0E+00
    1   46  2.252E+01  0.000E+00  0.000E+00  0.000E+00  0.000E+00  6.392E+03  0.000E+00   0.0E+00
    1   48  2.247E+01  0.000E+00  0.000E+00  0.000E+00  0.000E+00  1.968E+01  0.000E+00   0.0E+00
    1   49  2.247E+01  0.000E+00  0.000E+00  0.000E+00  2.945E+07  0.000E+00  0.000E+00   0.0E+00
    1   51  2.235E+01  0.000E+00  0.000E+00  0.000E+00  2.082E+09  0.000E+00  0.000E+00   0.0E+00
    1   53  2.228E+01  1.660E+10  3.704E-03  2.717E-04  0.000E+00  0.000E+00  0.000E+00   9.5E-01
    1   55  2.226E+01  0.000E+00  0.000E+00  0.000E+00  0.000E+00  0.000E+00  3.037E+05   0.0E+00
    1   57  2.224E+01  0.000E+00  0.000E+00  0.000E+00  0.000E+00  0.000E+00  5.724E+04   0.0E+00
    1   59  2.217E+01  1.081E+12  2.389E-01  1.744E-02  0.000E+00  0.000E+00  0.000E+00   9.5E-01
    1   62  2.207E+01  0.000E+00  0.000E+00  0.000E+00  0.000E+00  0.000E+00  1.861E+04   0.0E+00
    1   65  2.206E+01  0.000E+00  0.000E+00  0.000E+00  0.000E+00  0.000E+00  2.348E+04   0.0E+00
    1   67  2.205E+01  0.000E+00  0.000E+00  0.000E+00  2.607E+07  0.000E+00  0.000E+00   0.0E+00
    1   69  2.204E+01  0.000E+00  0.000E+00  0.000E+00  0.000E+00  3.594E-02  0.000E+00   0.0E+00
    1   70  2.204E+01  0.000E+00  0.000E+00  0.000E+00  3.388E+07  0.000E+00  0.000E+00   0.0E+00
    1   71  2.199E+01  2.487E+12  5.406E-01  3.913E-02  0.000E+00  0.000E+00  0.000E+00   9.5E-01
    1   74  2.187E+01  0.000E+00  0.000E+00  0.000E+00  7.572E+07  0.000E+00  0.000E+00   0.0E+00
    1   76  2.089E+01  0.000E+00  0.000E+00  0.000E+00  0.000E+00  0.000E+00  7.937E+03   0.0E+00
    1   77  2.088E+01  5.646E+10  1.108E-02  7.614E-04  0.000E+00  0.000E+00  0.000E+00   7.1E-01
    1   78  2.074E+01  0.000E+00  0.000E+00  0.000E+00  0.000E+00  3.896E+03  0.000E+00   0.0E+00
    1   79  2.073E+01  0.000E+00  0.000E+00  0.000E+00  2.839E+07  0.000E+00  0.000E+00   0.0E+00
    1   81  2.072E+01  0.000E+00  0.000E+00  0.000E+00  0.000E+00  1.077E+02  0.000E+00   0.0E+00
    1   83  2.072E+01  0.000E+00  0.000E+00  0.000E+00  2.467E+07  0.000E+00  0.000E+00   0.0E+00
    1   84  2.072E+01  4.167E+10  8.049E-03  5.491E-04  0.000E+00  0.000E+00  0.000E+00   7.3E-01
    1   86  2.057E+01  0.000E+00  0.000E+00  0.000E+00  0.000E+00  1.494E+02  0.000E+00   0.0E+00
    1   87  2.057E+01  0.000E+00  0.000E+00  0.000E+00  0.000E+00  2.694E+03  0.000E+00   0.0E+00
    1   88  2.056E+01  0.000E+00  0.000E+00  0.000E+00  3.006E+07  0.000E+00  0.000E+00   0.0E+00
    1   90  2.055E+01  1.092E+10  2.073E-03  1.402E-04  0.000E+00  0.000E+00  0.000E+00   9.2E-01
    1   92  2.054E+01  0.000E+00  0.000E+00  0.000E+00  0.000E+00  0.000E+00  1.693E+05   0.0E+00
    1   94  2.053E+01  0.000E+00  0.000E+00  0.000E+00  0.000E+00  0.000E+00  3.708E+04   0.0E+00
    1   97  2.050E+01  9.711E+11  1.835E-01  1.238E-02  0.000E+00  0.000E+00  0.000E+00   9.2E-01
    1   98  2.046E+01  0.000E+00  0.000E+00  0.000E+00  0.000E+00  1.006E+01  0.000E+00   0.0E+00
    1  101  2.046E+01  0.000E+00  0.000E+00  0.000E+00  7.876E+07  0.000E+00  0.000E+00   0.0E+00
    1  103  2.046E+01  0.000E+00  0.000E+00  0.000E+00  1.535E+08  0.000E+00  0.000E+00   0.0E+00
    1  104  2.046E+01  0.000E+00  0.000E+00  0.000E+00  0.000E+00  0.000E+00  6.763E-01   0.0E+00
    1  114  2.038E+01  0.000E+00  0.000E+00  0.000E+00  0.000E+00  0.000E+00  7.163E+03   0.0E+00
    1  115  2.038E+01  0.000E+00  0.000E+00  0.000E+00  0.000E+00  0.000E+00  2.434E+04   0.0E+00
    1  117  2.035E+01  1.052E+12  1.960E-01  1.313E-02  0.000E+00  0.000E+00  0.000E+00   9.2E-01
    1  121  2.030E+01  0.000E+00  0.000E+00  0.000E+00  1.136E+08  0.000E+00  0.000E+00   0.0E+00
    2    3  9.943E+03  0.000E+00  0.000E+00  0.000E+00  1.458E-05  1.336E+01  0.000E+00   0.0E+00
    2    4  2.662E+03  0.000E+00  0.000E+00  0.000E+00  2.380E-02  0.000E+00  0.000E+00   0.0E+00
    2    5  2.181E+03  0.000E+00  0.000E+00  0.000E+00  2.003E-02  9.001E+02  0.000E+00   0.0E+00
    2    6  5.997E+02  1.663E+09  5.379E-02  5.310E-01  0.000E+00  0.000E+00  3.133E-01   1.1E+00
    2    7  5.178E+02  1.523E+09  6.123E-02  5.218E-01  0.000E+00  0.000E+00  3.696E-03   1.0E+00
    2    8  5.143E+02  3.565E+09  1.979E-01  1.676E+00  0.000E+00  0.000E+00  6.485E-01   1.1E+00
    2    9  4.913E+02  4.716E+08  1.024E-02  8.282E-02  0.000E+00  0.000E+00  8.744E-01   9.3E-01
    2   10  4.741E+02  2.548E+09  8.586E-02  6.701E-01  0.000E+00  0.000E+00  1.556E+00   9.5E-01
    2   11  4.357E+02  6.904E+06  1.179E-04  8.453E-04  0.000E+00  0.000E+00  1.852E-01   7.0E-01
    2   12  4.343E+02  0.000E+00  0.000E+00  0.000E+00  0.000E+00  0.000E+00  1.656E+00   0.0E+00
    2   13  4.150E+02  7.042E+08  1.091E-02  7.450E-02  0.000E+00  0.000E+00  2.186E-01   8.4E-01
    2   14  4.152E+02  1.582E+08  4.090E-03  2.795E-02  0.000E+00  0.000E+00  3.270E-03   7.9E-01
    2   15  2.888E+02  0.000E+00  0.000E+00  0.000E+00  0.000E+00  0.000E+00  1.702E+01   0.0E+00
    2   16  2.321E+02  0.000E+00  0.000E+00  0.000E+00  2.080E+05  0.000E+00  0.000E+00   0.0E+00
    2   17  2.301E+02  0.000E+00  0.000E+00  0.000E+00  1.941E+05  6.678E+00  0.000E+00   0.0E+00
    2   18  2.261E+02  0.000E+00  0.000E+00  0.000E+00  1.449E+05  1.267E-01  0.000E+00   0.0E+00
    2   19  2.246E+02  0.000E+00  0.000E+00  0.000E+00  2.415E+05  0.000E+00  0.000E+00   0.0E+00
    2   20  2.221E+02  0.000E+00  0.000E+00  0.000E+00  1.114E+05  4.533E-02  0.000E+00   0.0E+00
    2   21  2.180E+02  0.000E+00  0.000E+00  0.000E+00  7.332E+04  9.622E-02  0.000E+00   0.0E+00
    2   22  2.155E+02  0.000E+00  0.000E+00  0.000E+00  1.517E+05  2.993E-01  0.000E+00   0.0E+00
    2   23  2.073E+02  0.000E+00  0.000E+00  0.000E+00  3.611E+04  4.006E+00  0.000E+00   0.0E+00
    2   24  2.042E+02  0.000E+00  0.000E+00  0.000E+00  8.309E+03  1.189E-02  0.000E+00   0.0E+00
    2   25  2.025E+02  0.000E+00  0.000E+00  0.000E+00  3.946E+04  1.493E+00  0.000E+00   0.0E+00
    2   26  2.021E+02  0.000E+00  0.000E+00  0.000E+00  1.954E+04  3.194E-01  0.000E+00   0.0E+00
    2   27  1.855E+02  0.000E+00  0.000E+00  0.000E+00  1.531E+03  8.176E+00  0.000E+00   0.0E+00
    2   28  1.267E+02  5.786E+10  8.357E-02  1.743E-01  0.000E+00  0.000E+00  1.771E+02   5.5E-01
    2   29  1.210E+02  0.000E+00  0.000E+00  0.000E+00  0.000E+00  0.000E+00  3.783E+02   0.0E+00
    2   30  1.024E+02  0.000E+00  0.000E+00  0.000E+00  4.009E+03  0.000E+00  0.000E+00   0.0E+00
    2   31  1.023E+02  0.000E+00  0.000E+00  0.000E+00  2.803E+03  2.441E+01  0.000E+00   0.0E+00
    2   32  1.017E+02  0.000E+00  0.000E+00  0.000E+00  1.170E+03  5.512E-03  0.000E+00   0.0E+00
    2   33  1.004E+02  0.000E+00  0.000E+00  0.000E+00  4.516E+01  4.621E+00  0.000E+00   0.0E+00
    2   34  9.079E+01  0.000E+00  0.000E+00  0.000E+00  5.183E+03  3.400E+00  0.000E+00   0.0E+00
    2   35  9.055E+01  0.000E+00  0.000E+00  0.000E+00  4.396E+03  7.517E+00  0.000E+00   0.0E+00
    2   36  8.781E+01  0.000E+00  0.000E+00  0.000E+00  2.035E+04  0.000E+00  0.000E+00   0.0E+00
    2   37  8.768E+01  0.000E+00  0.000E+00  0.000E+00  9.585E+03  9.742E-02  0.000E+00   0.0E+00
    2   38  8.550E+01  4.952E+10  3.256E-02  4.582E-02  0.000E+00  0.000E+00  4.106E+02   1.0E+00
    2   39  8.519E+01  2.378E+10  2.588E-02  3.629E-02  0.000E+00  0.000E+00  5.477E+00   1.0E+00
    2   40  8.519E+01  5.753E+10  8.762E-02  1.229E-01  0.000E+00  0.000E+00  3.147E+02   9.9E-01
    2   41  8.483E+01  4.168E+09  2.698E-03  3.767E-03  0.000E+00  0.000E+00  4.504E+02   1.0E+00
    2   42  8.466E+01  3.150E+10  3.384E-02  4.716E-02  0.000E+00  0.000E+00  5.735E+02   1.1E+00
    2   43  8.344E+01  0.000E+00  0.000E+00  0.000E+00  0.000E+00  0.000E+00  5.467E+02   0.0E+00
    2   44  8.285E+01  5.696E+07  3.517E-05  4.796E-05  0.000E+00  0.000E+00  5.077E+00   1.3E+00
    2   45  8.251E+01  6.766E+08  6.906E-04  9.379E-04  0.000E+00  0.000E+00  2.874E+00   1.2E+00
    2   46  8.227E+01  1.098E+09  6.682E-04  9.049E-04  0.000E+00  0.000E+00  1.010E+00   1.1E+00
    2   47  8.165E+01  3.267E+09  4.571E-03  6.143E-03  0.000E+00  0.000E+00  5.524E+01   9.7E-01
    2   48  8.154E+01  3.800E+07  2.273E-05  3.050E-05  0.000E+00  0.000E+00  1.282E-01   8.1E-01
    2   49  8.154E+01  4.981E+08  4.965E-04  6.664E-04  0.000E+00  0.000E+00  2.830E+00   8.8E-01
    2   50  8.029E+01  0.000E+00  0.000E+00  0.000E+00  0.000E+00  0.000E+00  1.518E+02   0.0E+00
    2   51  8.006E+01  1.076E+05  1.034E-07  1.363E-07  0.000E+00  0.000E+00  6.199E+00   2.2E-01
    2   52  7.921E+01  0.000E+00  0.000E+00  0.000E+00  2.649E+07  0.000E+00  0.000E+00   0.0E+00
    2   53  7.909E+01  0.000E+00  0.000E+00  0.000E+00  2.509E+07  2.043E-02  0.000E+00   0.0E+00
    2   54  7.892E+01  0.000E+00  0.000E+00  0.000E+00  2.583E+07  0.000E+00  0.000E+00   0.0E+00
    2   55  7.888E+01  0.000E+00  0.000E+00  0.000E+00  1.822E+07  1.429E-02  0.000E+00   0.0E+00
    2   56  7.878E+01  0.000E+00  0.000E+00  0.000E+00  1.174E+07  4.614E-02  0.000E+00   0.0E+00
    2   57  7.858E+01  0.000E+00  0.000E+00  0.000E+00  6.810E+06  1.656E-02  0.000E+00   0.0E+00
    2   58  7.848E+01  0.000E+00  0.000E+00  0.000E+00  1.323E+07  4.463E-03  0.000E+00   0.0E+00
    2   59  7.775E+01  0.000E+00  0.000E+00  0.000E+00  9.072E+05  5.026E-01  0.000E+00   0.0E+00
    2   61  7.659E+01  0.000E+00  0.000E+00  0.000E+00  0.000E+00  0.000E+00  9.711E-04   0.0E+00
    2   62  7.654E+01  0.000E+00  0.000E+00  0.000E+00  3.071E+04  2.117E-02  0.000E+00   0.0E+00
    2   63  7.643E+01  2.173E+03  2.665E-09  3.353E-09  0.000E+00  0.000E+00  1.032E-01   1.0E+00
    2   64  7.642E+01  0.000E+00  0.000E+00  0.000E+00  0.000E+00  0.000E+00  7.542E-01   0.0E+00
    2   65  7.648E+01  0.000E+00  0.000E+00  0.000E+00  3.522E+05  2.353E-05  0.000E+00   0.0E+00
    2   66  7.640E+01  0.000E+00  0.000E+00  0.000E+00  1.177E+05  3.380E-03  0.000E+00   0.0E+00
    2   67  7.632E+01  8.811E+05  7.693E-07  9.664E-07  0.000E+00  0.000E+00  2.920E-02   1.0E+00
    2   68  7.630E+01  1.030E+07  1.259E-05  1.582E-05  0.000E+00  0.000E+00  1.195E-02   1.0E+00
    2   69  7.624E+01  7.623E+05  3.985E-07  5.001E-07  0.000E+00  0.000E+00  1.014E-01   1.0E+00
    2   70  7.624E+01  4.230E+06  3.685E-06  4.624E-06  0.000E+00  0.000E+00  4.016E-01   1.0E+00
    2   71  7.555E+01  0.000E+00  0.000E+00  0.000E+00  4.682E+04  9.218E-01  0.000E+00   0.0E+00
    2   72  7.439E+01  6.554E+03  7.612E-09  9.320E-09  0.000E+00  0.000E+00  3.853E-02   1.0E+00
    2   73  7.437E+01  0.000E+00  0.000E+00  0.000E+00  0.000E+00  0.000E+00  2.987E-01   0.0E+00
    2   74  7.423E+01  3.078E+06  2.543E-06  3.107E-06  0.000E+00  0.000E+00  4.010E-02   9.9E-01
    2   75  7.422E+01  2.976E+07  3.440E-05  4.203E-05  0.000E+00  0.000E+00  1.324E+00   1.0E+00
    2   76  6.402E+01  0.000E+00  0.000E+00  0.000E+00  3.763E+03  3.776E+00  0.000E+00   0.0E+00
    2   77  6.395E+01  0.000E+00  0.000E+00  0.000E+00  2.995E+03  8.613E+00  0.000E+00   0.0E+00
    2   78  6.266E+01  3.125E+10  1.103E-02  1.138E-02  0.000E+00  0.000E+00  4.064E+02   1.0E+00
    2   79  6.254E+01  1.559E+10  9.141E-03  9.411E-03  0.000E+00  0.000E+00  1.804E+00   1.0E+00
    2   80  6.253E+01  3.557E+10  2.919E-02  3.005E-02  0.000E+00  0.000E+00  3.844E+02   9.9E-01
    2   81  6.247E+01  2.491E+09  8.745E-04  8.992E-04  0.000E+00  0.000E+00  4.807E+02   1.1E+00
    2   82  6.251E+01  0.000E+00  0.000E+00  0.000E+00  2.311E+04  0.000E+00  0.000E+00   0.0E+00
    2   83  6.243E+01  1.768E+10  1.033E-02  1.062E-02  0.000E+00  0.000E+00  6.340E+02   1.1E+00
    2   84  6.247E+01  0.000E+00  0.000E+00  0.000E+00  1.151E+04  4.248E-02  0.000E+00   0.0E+00
    2   85  6.199E+01  0.000E+00  0.000E+00  0.000E+00  0.000E+00  0.000E+00  7.885E+02   0.0E+00
    2   86  6.112E+01  1.011E+07  3.399E-06  3.419E-06  0.000E+00  0.000E+00  1.660E-01   1.1E+00
    2   87  6.107E+01  1.170E+08  3.925E-05  3.945E-05  0.000E+00  0.000E+00  2.048E-02   1.9E+00
    2   88  6.104E+01  8.268E+05  4.619E-07  4.641E-07  0.000E+00  0.000E+00  4.377E-02   1.5E+01
    2   89  6.095E+01  0.000E+00  0.000E+00  0.000E+00  1.489E+07  0.000E+00  0.000E+00   0.0E+00
    2   90  6.091E+01  0.000E+00  0.000E+00  0.000E+00  1.449E+07  5.822E-02  0.000E+00   0.0E+00
    2   91  6.086E+01  0.000E+00  0.000E+00  0.000E+00  1.478E+07  0.000E+00  0.000E+00   0.0E+00
    2   92  6.084E+01  0.000E+00  0.000E+00  0.000E+00  1.073E+07  2.894E-03  0.000E+00   0.0E+00
    2   93  6.082E+01  0.000E+00  0.000E+00  0.000E+00  6.830E+06  8.422E-02  0.000E+00   0.0E+00
    2   94  6.077E+01  0.000E+00  0.000E+00  0.000E+00  3.902E+06  4.408E-02  0.000E+00   0.0E+00
    2   95  6.074E+01  0.000E+00  0.000E+00  0.000E+00  7.770E+06  2.033E-04  0.000E+00   0.0E+00
    2   96  6.066E+01  0.000E+00  0.000E+00  0.000E+00  0.000E+00  0.000E+00  5.399E+01   0.0E+00
    2   97  6.047E+01  0.000E+00  0.000E+00  0.000E+00  2.914E+05  2.963E-01  0.000E+00   0.0E+00
    2   98  6.016E+01  2.164E+06  7.044E-07  6.975E-07  0.000E+00  0.000E+00  8.478E-02   8.6E-01
    2  100  6.015E+01  0.000E+00  0.000E+00  0.000E+00  0.000E+00  0.000E+00  1.594E-03   0.0E+00
    2  101  6.015E+01  1.438E+07  7.801E-06  7.723E-06  0.000E+00  0.000E+00  1.184E+00   8.7E-01
    2  102  6.012E+01  3.587E+07  2.721E-05  2.692E-05  0.000E+00  0.000E+00  7.778E-01   8.8E-01
    2  103  6.011E+01  9.688E+05  5.247E-07  5.192E-07  0.000E+00  0.000E+00  1.873E-01   8.7E-01
    2  104  6.010E+01  0.000E+00  0.000E+00  0.000E+00  8.578E+02  2.692E-04  0.000E+00   0.0E+00
    2  105  6.010E+01  1.020E+05  7.735E-08  7.653E-08  0.000E+00  0.000E+00  1.116E-01   8.8E-01
    2  106  6.010E+01  0.000E+00  0.000E+00  0.000E+00  2.336E+03  2.085E-05  0.000E+00   0.0E+00
    2  107  6.010E+01  0.000E+00  0.000E+00  0.000E+00  0.000E+00  0.000E+00  5.933E-01   0.0E+00
    2  110  6.007E+01  0.000E+00  0.000E+00  0.000E+00  9.036E+02  3.567E-06  0.000E+00   0.0E+00
    2  111  6.007E+01  0.000E+00  0.000E+00  0.000E+00  6.103E+03  0.000E+00  0.000E+00   0.0E+00
    2  112  6.006E+01  0.000E+00  0.000E+00  0.000E+00  8.081E+00  0.000E+00  0.000E+00   0.0E+00
    2  114  5.947E+01  0.000E+00  0.000E+00  0.000E+00  2.142E+03  1.642E-02  0.000E+00   0.0E+00
    2  115  5.946E+01  0.000E+00  0.000E+00  0.000E+00  4.790E+04  7.853E-03  0.000E+00   0.0E+00
    2  116  5.943E+01  0.000E+00  0.000E+00  0.000E+00  1.489E+04  2.637E-04  0.000E+00   0.0E+00
    2  117  5.921E+01  0.000E+00  0.000E+00  0.000E+00  1.489E+04  3.341E-01  0.000E+00   0.0E+00
    2  118  5.880E+01  4.108E+04  2.981E-08  2.886E-08  0.000E+00  0.000E+00  1.624E-02   9.0E-01
    2  119  5.879E+01  0.000E+00  0.000E+00  0.000E+00  0.000E+00  0.000E+00  2.109E-01   0.0E+00
    2  120  5.879E+01  3.232E+07  2.345E-05  2.269E-05  0.000E+00  0.000E+00  2.113E+00   8.6E-01
    2  121  5.878E+01  3.251E+06  1.684E-06  1.630E-06  0.000E+00  0.000E+00  2.828E-02   8.6E-01
    2  122  5.875E+01  0.000E+00  0.000E+00  0.000E+00  1.207E+03  2.287E-06  0.000E+00   0.0E+00
    2  123  5.874E+01  0.000E+00  0.000E+00  0.000E+00  8.386E+03  0.000E+00  0.000E+00   0.0E+00
    2  124  5.874E+01  0.000E+00  0.000E+00  0.000E+00  6.180E+01  0.000E+00  0.000E+00   0.0E+00
    3    4  3.636E+03  0.000E+00  0.000E+00  0.000E+00  0.000E+00  6.537E+02  0.000E+00   0.0E+00
    3    5  2.794E+03  0.000E+00  0.000E+00  0.000E+00  7.658E-03  1.503E+02  0.000E+00   0.0E+00
    3    6  6.382E+02  2.152E+08  1.314E-02  8.283E-02  0.000E+00  0.000E+00  3.633E-03   1.3E+00
    3    7  5.462E+02  1.687E+09  1.258E-01  6.785E-01  0.000E+00  0.000E+00  1.414E-04   1.1E+00
    3    8  5.423E+02  0.000E+00  0.000E+00  0.000E+00  0.000E+00  0.000E+00  6.833E-01   0.0E+00
    3    9  5.169E+02  3.017E+09  1.208E-01  6.169E-01  0.000E+00  0.000E+00  7.579E-02   1.1E+00
    3   10  4.978E+02  1.644E+09  1.018E-01  5.004E-01  0.000E+00  0.000E+00  5.317E-01   1.0E+00
    3   11  4.556E+02  5.256E+07  1.636E-03  7.362E-03  0.000E+00  0.000E+00  3.923E-03   1.2E+00
    3   12  4.541E+02  3.794E+09  3.910E-02  1.754E-01  0.000E+00  0.000E+00  0.000E+00   9.2E-01
    3   13  4.330E+02  4.289E+06  1.206E-04  5.157E-04  0.000E+00  0.000E+00  3.847E-01   1.5E-01
    3   14  4.333E+02  1.604E+08  7.527E-03  3.221E-02  0.000E+00  0.000E+00  1.004E-01   8.6E-01
    3   15  2.974E+02  6.657E+09  2.942E-02  8.642E-02  0.000E+00  0.000E+00  0.000E+00   7.7E-01
    3   16  2.376E+02  0.000E+00  0.000E+00  0.000E+00  0.000E+00  1.093E+01  0.000E+00   0.0E+00
    3   17  2.355E+02  0.000E+00  0.000E+00  0.000E+00  1.527E+04  2.078E+00  0.000E+00   0.0E+00
    3   18  2.314E+02  0.000E+00  0.000E+00  0.000E+00  6.446E+04  3.613E-01  0.000E+00   0.0E+00
    3   20  2.272E+02  0.000E+00  0.000E+00  0.000E+00  1.297E+05  0.000E+00  0.000E+00   0.0E+00
    3   21  2.229E+02  0.000E+00  0.000E+00  0.000E+00  1.707E+05  4.171E-01  0.000E+00   0.0E+00
    3   22  2.202E+02  0.000E+00  0.000E+00  0.000E+00  1.086E+05  0.000E+00  0.000E+00   0.0E+00
    3   23  2.117E+02  0.000E+00  0.000E+00  0.000E+00  2.610E+05  7.572E-01  0.000E+00   0.0E+00
    3   24  2.084E+02  0.000E+00  0.000E+00  0.000E+00  2.902E+03  4.080E-01  0.000E+00   0.0E+00
    3   25  2.067E+02  0.000E+00  0.000E+00  0.000E+00  3.672E+01  2.637E-01  0.000E+00   0.0E+00
    3   26  2.064E+02  0.000E+00  0.000E+00  0.000E+00  1.303E+04  0.000E+00  0.000E+00   0.0E+00
    3   27  1.890E+02  0.000E+00  0.000E+00  0.000E+00  1.127E+05  6.892E+00  0.000E+00   0.0E+00
    3   28  1.284E+02  1.955E+10  4.828E-02  6.120E-02  0.000E+00  0.000E+00  2.064E+02   5.5E-01
    3   29  1.225E+02  2.907E+10  2.179E-02  2.635E-02  0.000E+00  0.000E+00  0.000E+00   5.0E-01
    3   30  1.035E+02  0.000E+00  0.000E+00  0.000E+00  0.000E+00  2.898E+01  0.000E+00   0.0E+00
    3   31  1.033E+02  0.000E+00  0.000E+00  0.000E+00  1.073E+01  5.719E-01  0.000E+00   0.0E+00
    3   32  1.028E+02  0.000E+00  0.000E+00  0.000E+00  8.815E+02  1.770E+00  0.000E+00   0.0E+00
    3   33  1.014E+02  0.000E+00  0.000E+00  0.000E+00  1.737E+04  6.494E-01  0.000E+00   0.0E+00
    3   34  9.162E+01  0.000E+00  0.000E+00  0.000E+00  3.706E+03  5.343E+00  0.000E+00   0.0E+00
    3   35  9.138E+01  0.000E+00  0.000E+00  0.000E+00  1.110E+04  2.321E-01  0.000E+00   0.0E+00
    3   36  8.859E+01  0.000E+00  0.000E+00  0.000E+00  0.000E+00  2.389E+00  0.000E+00   0.0E+00
    3   37  8.846E+01  0.000E+00  0.000E+00  0.000E+00  2.840E+04  7.538E-01  0.000E+00   0.0E+00
    3   38  8.624E+01  4.015E+09  4.477E-03  3.813E-03  0.000E+00  0.000E+00  6.469E+00   9.9E-01
    3   39  8.593E+01  3.551E+10  6.551E-02  5.559E-02  0.000E+00  0.000E+00  1.371E+00   9.7E-01
    3   40  8.593E+01  0.000E+00  0.000E+00  0.000E+00  0.000E+00  0.000E+00  4.840E+02   0.0E+00
    3   41  8.556E+01  5.189E+10  5.695E-02  4.812E-02  0.000E+00  0.000E+00  4.058E+01   9.9E-01
    3   42  8.538E+01  2.133E+10  3.886E-02  3.277E-02  0.000E+00  0.000E+00  2.424E+02   1.0E+00
    3   43  8.414E+01  4.572E+10  1.618E-02  1.344E-02  0.000E+00  0.000E+00  0.000E+00   1.1E+00
    3   44  8.354E+01  1.190E+07  1.246E-05  1.028E-05  0.000E+00  0.000E+00  1.022E+00   1.5E+00
    3   45  8.320E+01  8.821E+08  1.526E-03  1.254E-03  0.000E+00  0.000E+00  1.303E+01   1.1E+00
    3   46  8.295E+01  8.215E+08  8.475E-04  6.943E-04  0.000E+00  0.000E+00  7.624E+01   1.3E+00
    3   47  8.232E+01  0.000E+00  0.000E+00  0.000E+00  0.000E+00  0.000E+00  1.204E+01   0.0E+00
    3   48  8.221E+01  1.085E+09  1.099E-03  8.925E-04  0.000E+00  0.000E+00  5.222E-01   9.8E-01
    3   49  8.221E+01  2.816E+09  4.756E-03  3.862E-03  0.000E+00  0.000E+00  1.582E+01   1.0E+00
    3   50  8.095E+01  2.720E+09  8.906E-04  7.120E-04  0.000E+00  0.000E+00  0.000E+00   1.2E+00
    3   51  8.071E+01  7.760E+07  1.263E-04  1.007E-04  0.000E+00  0.000E+00  1.510E+00   1.5E+00
    3   52  7.985E+01  0.000E+00  0.000E+00  0.000E+00  0.000E+00  2.109E-03  0.000E+00   0.0E+00
    3   53  7.972E+01  0.000E+00  0.000E+00  0.000E+00  1.010E+06  1.674E-03  0.000E+00   0.0E+00
    3   55  7.951E+01  0.000E+00  0.000E+00  0.000E+00  7.284E+06  2.301E-02  0.000E+00   0.0E+00
    3   56  7.941E+01  0.000E+00  0.000E+00  0.000E+00  1.361E+07  0.000E+00  0.000E+00   0.0E+00
    3   57  7.921E+01  0.000E+00  0.000E+00  0.000E+00  1.746E+07  5.311E-02  0.000E+00   0.0E+00
    3   58  7.911E+01  0.000E+00  0.000E+00  0.000E+00  1.057E+07  0.000E+00  0.000E+00   0.0E+00
    3   59  7.836E+01  0.000E+00  0.000E+00  0.000E+00  2.292E+07  1.395E-01  0.000E+00   0.0E+00
    3   62  7.713E+01  0.000E+00  0.000E+00  0.000E+00  2.710E+05  5.854E-03  0.000E+00   0.0E+00
    3   63  7.703E+01  0.000E+00  0.000E+00  0.000E+00  0.000E+00  0.000E+00  1.021E+00   0.0E+00
    3   65  7.707E+01  0.000E+00  0.000E+00  0.000E+00  3.197E+05  2.873E-02  0.000E+00   0.0E+00
    3   66  7.699E+01  0.000E+00  0.000E+00  0.000E+00  1.195E+06  0.000E+00  0.000E+00   0.0E+00
    3   67  7.691E+01  8.296E+07  1.226E-04  9.312E-05  0.000E+00  0.000E+00  7.757E-05   9.1E-01
    3   68  7.689E+01  0.000E+00  0.000E+00  0.000E+00  0.000E+00  0.000E+00  6.886E-01   0.0E+00
    3   69  7.683E+01  6.472E+06  5.727E-06  4.345E-06  0.000E+00  0.000E+00  4.462E-01   1.0E+00
    3   70  7.682E+01  4.008E+07  5.911E-05  4.485E-05  0.000E+00  0.000E+00  1.053E+00   8.5E-01
    3   71  7.613E+01  0.000E+00  0.000E+00  0.000E+00  1.943E+05  7.325E-01  0.000E+00   0.0E+00
    3   72  7.495E+01  0.000E+00  0.000E+00  0.000E+00  0.000E+00  0.000E+00  4.067E-01   0.0E+00
    3   74  7.479E+01  1.140E+08  1.593E-04  1.176E-04  0.000E+00  0.000E+00  6.583E-01   9.5E-01
    3   75  7.478E+01  0.000E+00  0.000E+00  0.000E+00  0.000E+00  0.000E+00  4.917E-01   0.0E+00
    3   76  6.444E+01  0.000E+00  0.000E+00  0.000E+00  2.564E+03  4.389E+00  0.000E+00   0.0E+00
    3   77  6.436E+01  0.000E+00  0.000E+00  0.000E+00  6.139E+02  7.035E-01  0.000E+00   0.0E+00
    3   78  6.306E+01  2.635E+09  1.571E-03  9.783E-04  0.000E+00  0.000E+00  1.528E+01   8.8E-01
    3   79  6.294E+01  1.984E+10  1.963E-02  1.220E-02  0.000E+00  0.000E+00  4.017E-01   9.6E-01
    3   80  6.293E+01  0.000E+00  0.000E+00  0.000E+00  0.000E+00  0.000E+00  5.311E+02   0.0E+00
    3   81  6.287E+01  3.114E+10  1.845E-02  1.146E-02  0.000E+00  0.000E+00  4.276E+01   9.6E-01
    3   82  6.290E+01  0.000E+00  0.000E+00  0.000E+00  0.000E+00  2.414E+00  0.000E+00   0.0E+00
    3   83  6.283E+01  1.405E+10  1.385E-02  8.596E-03  0.000E+00  0.000E+00  2.699E+02   1.0E+00
    3   84  6.287E+01  0.000E+00  0.000E+00  0.000E+00  1.598E+04  8.092E-01  0.000E+00   0.0E+00
    3   85  6.238E+01  3.052E+10  5.934E-03  3.656E-03  0.000E+00  0.000E+00  0.000E+00   1.1E+00
    3   86  6.150E+01  9.716E+08  5.510E-04  3.347E-04  0.000E+00  0.000E+00  1.364E-01   1.1E+00
    3   87  6.144E+01  3.633E+08  2.056E-04  1.248E-04  0.000E+00  0.000E+00  7.128E+01   1.4E+00
    3   88  6.142E+01  1.754E+09  1.653E-03  1.003E-03  0.000E+00  0.000E+00  3.252E+01   1.1E+00
    3   89  6.132E+01  0.000E+00  0.000E+00  0.000E+00  0.000E+00  1.405E-03  0.000E+00   0.0E+00
    3   90  6.128E+01  0.000E+00  0.000E+00  0.000E+00  3.320E+05  5.551E-02  0.000E+00   0.0E+00
    3   92  6.122E+01  0.000E+00  0.000E+00  0.000E+00  3.910E+06  1.429E-02  0.000E+00   0.0E+00
    3   93  6.120E+01  0.000E+00  0.000E+00  0.000E+00  7.609E+06  0.000E+00  0.000E+00   0.0E+00
    3   94  6.114E+01  0.000E+00  0.000E+00  0.000E+00  1.020E+07  3.300E-02  0.000E+00   0.0E+00
    3   95  6.111E+01  0.000E+00  0.000E+00  0.000E+00  6.323E+06  0.000E+00  0.000E+00   0.0E+00
    3   96  6.103E+01  3.292E+06  6.127E-07  3.693E-07  0.000E+00  0.000E+00  0.000E+00   1.1E+01
    3   97  6.084E+01  0.000E+00  0.000E+00  0.000E+00  1.445E+07  1.836E-01  0.000E+00   0.0E+00
    3   98  6.052E+01  2.162E+07  1.187E-05  7.096E-06  0.000E+00  0.000E+00  4.787E-01   8.9E-01
    3  101  6.051E+01  2.274E+05  2.081E-07  1.243E-07  0.000E+00  0.000E+00  1.339E-01   1.0E-03
    3  102  6.048E+01  0.000E+00  0.000E+00  0.000E+00  0.000E+00  0.000E+00  6.248E-01   0.0E+00
    3  103  6.047E+01  6.640E+07  6.067E-05  3.624E-05  0.000E+00  0.000E+00  5.156E-02   1.0E+00
    3  104  6.047E+01  0.000E+00  0.000E+00  0.000E+00  4.331E+03  7.962E-06  0.000E+00   0.0E+00
    3  105  6.047E+01  0.000E+00  0.000E+00  0.000E+00  0.000E+00  0.000E+00  8.654E-01   0.0E+00
    3  106  6.047E+01  0.000E+00  0.000E+00  0.000E+00  5.554E+01  0.000E+00  0.000E+00   0.0E+00
    3  110  6.044E+01  0.000E+00  0.000E+00  0.000E+00  7.884E+03  0.000E+00  0.000E+00   0.0E+00
    3  114  5.983E+01  0.000E+00  0.000E+00  0.000E+00  3.270E+05  2.062E-03  0.000E+00   0.0E+00
    3  115  5.982E+01  0.000E+00  0.000E+00  0.000E+00  2.812E+05  6.929E-03  0.000E+00   0.0E+00
    3  116  5.979E+01  0.000E+00  0.000E+00  0.000E+00  7.914E+05  0.000E+00  0.000E+00   0.0E+00
    3  117  5.957E+01  0.000E+00  0.000E+00  0.000E+00  5.815E+04  2.102E-01  0.000E+00   0.0E+00
    3  118  5.915E+01  0.000E+00  0.000E+00  0.000E+00  0.000E+00  0.000E+00  2.573E-01   0.0E+00
    3  120  5.913E+01  0.000E+00  0.000E+00  0.000E+00  0.000E+00  0.000E+00  3.776E-01   0.0E+00
    3  121  5.913E+01  6.207E+07  5.422E-05  3.167E-05  0.000E+00  0.000E+00  6.495E-01   1.0E+00
    3  122  5.910E+01  0.000E+00  0.000E+00  0.000E+00  1.386E+04  0.000E+00  0.000E+00   0.0E+00
    4    5  1.206E+04  0.000E+00  0.000E+00  0.000E+00  0.000E+00  4.290E+00  0.000E+00   0.0E+00
    4    6  7.740E+02  3.258E+07  8.778E-03  2.237E-02  0.000E+00  0.000E+00  0.000E+00   1.6E+00
    4    7  6.428E+02  0.000E+00  0.000E+00  0.000E+00  0.000E+00  0.000E+00  5.971E-03   0.0E+00
    4    9  6.025E+02  6.182E+07  1.009E-02  2.002E-02  0.000E+00  0.000E+00  0.000E+00   1.3E+00
    4   10  5.768E+02  0.000E+00  0.000E+00  0.000E+00  0.000E+00  0.000E+00  1.012E-03   0.0E+00
    4   11  5.209E+02  1.633E+09  1.993E-01  3.417E-01  0.000E+00  0.000E+00  0.000E+00   1.0E+00
    4   13  4.916E+02  1.884E+09  2.047E-01  3.313E-01  0.000E+00  0.000E+00  0.000E+00   9.9E-01
    4   14  4.919E+02  0.000E+00  0.000E+00  0.000E+00  0.000E+00  0.000E+00  7.596E-01   0.0E+00
    4   17  2.519E+02  0.000E+00  0.000E+00  0.000E+00  0.000E+00  4.214E-01  0.000E+00   0.0E+00
    4   18  2.471E+02  0.000E+00  0.000E+00  0.000E+00  8.533E+03  0.000E+00  0.000E+00   0.0E+00
    4   21  2.374E+02  0.000E+00  0.000E+00  0.000E+00  9.462E+03  0.000E+00  0.000E+00   0.0E+00
    4   23  2.248E+02  0.000E+00  0.000E+00  0.000E+00  0.000E+00  1.147E-03  0.000E+00   0.0E+00
    4   24  2.211E+02  0.000E+00  0.000E+00  0.000E+00  1.308E+05  0.000E+00  0.000E+00   0.0E+00
    4   25  2.192E+02  0.000E+00  0.000E+00  0.000E+00  1.063E+05  0.000E+00  0.000E+00   0.0E+00
    4   27  1.993E+02  0.000E+00  0.000E+00  0.000E+00  0.000E+00  1.107E+01  0.000E+00   0.0E+00
    4   28  1.331E+02  1.004E+10  7.998E-02  3.503E-02  0.000E+00  0.000E+00  0.000E+00   5.3E-01
    4   31  1.064E+02  0.000E+00  0.000E+00  0.000E+00  0.000E+00  3.470E+00  0.000E+00   0.0E+00
    4   32  1.058E+02  0.000E+00  0.000E+00  0.000E+00  6.895E+02  0.000E+00  0.000E+00   0.0E+00
    4   33  1.043E+02  0.000E+00  0.000E+00  0.000E+00  0.000E+00  2.794E-01  0.000E+00   0.0E+00
    4   34  9.399E+01  0.000E+00  0.000E+00  0.000E+00  2.432E+03  0.000E+00  0.000E+00   0.0E+00
    4   35  9.374E+01  0.000E+00  0.000E+00  0.000E+00  0.000E+00  3.034E-01  0.000E+00   0.0E+00
    4   37  9.066E+01  0.000E+00  0.000E+00  0.000E+00  0.000E+00  1.757E+00  0.000E+00   0.0E+00
    4   38  8.833E+01  4.773E+08  1.675E-03  4.871E-04  0.000E+00  0.000E+00  0.000E+00   9.3E-01
    4   39  8.800E+01  0.000E+00  0.000E+00  0.000E+00  0.000E+00  0.000E+00  2.341E+00   0.0E+00
    4   41  8.762E+01  3.545E+08  1.224E-03  3.531E-04  0.000E+00  0.000E+00  0.000E+00   7.9E-01
    4   42  8.744E+01  0.000E+00  0.000E+00  0.000E+00  0.000E+00  0.000E+00  2.785E-01   0.0E+00
    4   44  8.551E+01  2.465E+10  8.105E-02  2.282E-02  0.000E+00  0.000E+00  0.000E+00   1.0E+00
    4   45  8.515E+01  0.000E+00  0.000E+00  0.000E+00  0.000E+00  0.000E+00  2.588E+02   0.0E+00
    4   46  8.489E+01  2.050E+10  6.643E-02  1.857E-02  0.000E+00  0.000E+00  0.000E+00   1.0E+00
    4   48  8.411E+01  1.239E+10  3.943E-02  1.092E-02  0.000E+00  0.000E+00  0.000E+00   9.9E-01
    4   49  8.411E+01  0.000E+00  0.000E+00  0.000E+00  0.000E+00  0.000E+00  6.898E+01   0.0E+00
    4   51  8.254E+01  0.000E+00  0.000E+00  0.000E+00  0.000E+00  0.000E+00  1.048E+01   0.0E+00
    4   53  8.151E+01  0.000E+00  0.000E+00  0.000E+00  0.000E+00  1.196E-02  0.000E+00   0.0E+00
    4   55  8.128E+01  0.000E+00  0.000E+00  0.000E+00  3.099E+05  0.000E+00  0.000E+00   0.0E+00
    4   57  8.097E+01  0.000E+00  0.000E+00  0.000E+00  1.469E+05  0.000E+00  0.000E+00   0.0E+00
    4   59  8.009E+01  0.000E+00  0.000E+00  0.000E+00  0.000E+00  4.734E-01  0.000E+00   0.0E+00
    4   62  7.880E+01  0.000E+00  0.000E+00  0.000E+00  1.299E+07  0.000E+00  0.000E+00   0.0E+00
    4   65  7.874E+01  0.000E+00  0.000E+00  0.000E+00  1.215E+07  0.000E+00  0.000E+00   0.0E+00
    4   67  7.857E+01  0.000E+00  0.000E+00  0.000E+00  0.000E+00  0.000E+00  6.456E-01   0.0E+00
    4   69  7.848E+01  1.164E+07  3.225E-05  8.332E-06  0.000E+00  0.000E+00  0.000E+00   1.0E+00
    4   70  7.848E+01  0.000E+00  0.000E+00  0.000E+00  0.000E+00  0.000E+00  5.610E-02   0.0E+00
    4   71  7.776E+01  0.000E+00  0.000E+00  0.000E+00  0.000E+00  7.040E-01  0.000E+00   0.0E+00
    4   74  7.636E+01  0.000E+00  0.000E+00  0.000E+00  0.000E+00  0.000E+00  7.139E-03   0.0E+00
    4   76  6.560E+01  0.000E+00  0.000E+00  0.000E+00  1.429E+03  0.000E+00  0.000E+00   0.0E+00
    4   77  6.552E+01  0.000E+00  0.000E+00  0.000E+00  0.000E+00  2.037E-02  0.000E+00   0.0E+00
    4   78  6.417E+01  1.201E+08  2.224E-04  4.698E-05  0.000E+00  0.000E+00  0.000E+00   5.8E-01
    4   79  6.405E+01  0.000E+00  0.000E+00  0.000E+00  0.000E+00  0.000E+00  2.192E-01   0.0E+00
    4   81  6.397E+01  3.230E+07  5.945E-05  1.252E-05  0.000E+00  0.000E+00  0.000E+00   4.8E-01
    4   83  6.393E+01  0.000E+00  0.000E+00  0.000E+00  0.000E+00  0.000E+00  1.086E-02   0.0E+00
    4   84  6.398E+01  0.000E+00  0.000E+00  0.000E+00  0.000E+00  2.345E+00  0.000E+00   0.0E+00
    4   86  6.256E+01  1.295E+10  2.279E-02  4.694E-03  0.000E+00  0.000E+00  0.000E+00   1.0E+00
    4   87  6.250E+01  2.137E+10  3.754E-02  7.724E-03  0.000E+00  0.000E+00  0.000E+00   1.0E+00
    4   88  6.248E+01  0.000E+00  0.000E+00  0.000E+00  0.000E+00  0.000E+00  3.686E+02   0.0E+00
    4   90  6.233E+01  0.000E+00  0.000E+00  0.000E+00  0.000E+00  2.185E-03  0.000E+00   0.0E+00
    4   92  6.227E+01  0.000E+00  0.000E+00  0.000E+00  3.793E+04  0.000E+00  0.000E+00   0.0E+00
    4   94  6.219E+01  0.000E+00  0.000E+00  0.000E+00  1.514E+04  0.000E+00  0.000E+00   0.0E+00
    4   97  6.187E+01  0.000E+00  0.000E+00  0.000E+00  0.000E+00  3.376E-01  0.000E+00   0.0E+00
    4   98  6.155E+01  6.764E+07  1.152E-04  2.335E-05  0.000E+00  0.000E+00  0.000E+00   9.0E-01
    4  101  6.154E+01  0.000E+00  0.000E+00  0.000E+00  0.000E+00  0.000E+00  2.120E-02   0.0E+00
    4  103  6.150E+01  0.000E+00  0.000E+00  0.000E+00  0.000E+00  0.000E+00  6.700E-01   0.0E+00
    4  104  6.149E+01  0.000E+00  0.000E+00  0.000E+00  1.176E+04  0.000E+00  0.000E+00   0.0E+00
    4  114  6.083E+01  0.000E+00  0.000E+00  0.000E+00  6.766E+06  0.000E+00  0.000E+00   0.0E+00
    4  115  6.082E+01  0.000E+00  0.000E+00  0.000E+00  7.900E+06  0.000E+00  0.000E+00   0.0E+00
    4  117  6.056E+01  0.000E+00  0.000E+00  0.000E+00  0.000E+00  8.407E-02  0.000E+00   0.0E+00
    4  121  6.011E+01  0.000E+00  0.000E+00  0.000E+00  0.000E+00  0.000E+00  2.033E-03   0.0E+00
    5    6  8.271E+02  2.666E+07  2.734E-03  2.233E-02  0.000E+00  0.000E+00  2.029E-02   1.5E+00
    5    7  6.790E+02  1.876E+06  2.162E-04  1.449E-03  0.000E+00  0.000E+00  6.940E-03   1.2E+00
    5    8  6.730E+02  0.000E+00  0.000E+00  0.000E+00  0.000E+00  0.000E+00  1.498E-02   0.0E+00
    5    9  6.342E+02  7.315E+05  4.411E-05  2.763E-04  0.000E+00  0.000E+00  1.008E-03   5.5E+00
    5   10  6.058E+02  1.068E+08  9.790E-03  5.857E-02  0.000E+00  0.000E+00  5.387E-03   1.3E+00
    5   11  5.444E+02  1.529E+09  6.794E-02  3.653E-01  0.000E+00  0.000E+00  4.518E-02   1.1E+00
    5   12  5.423E+02  8.997E+08  1.322E-02  7.081E-02  0.000E+00  0.000E+00  0.000E+00   1.0E+00
    5   13  5.125E+02  1.605E+09  6.319E-02  3.198E-01  0.000E+00  0.000E+00  1.207E+00   1.1E+00
    5   14  5.129E+02  3.472E+09  2.282E-01  1.156E+00  0.000E+00  0.000E+00  8.823E-01   1.1E+00
    5   15  3.328E+02  1.081E+10  5.985E-02  1.967E-01  0.000E+00  0.000E+00  0.000E+00   7.9E-01
    5   16  2.597E+02  0.000E+00  0.000E+00  0.000E+00  0.000E+00  1.039E+00  0.000E+00   0.0E+00
    5   17  2.572E+02  0.000E+00  0.000E+00  0.000E+00  3.377E+03  1.243E+00  0.000E+00   0.0E+00
    5   18  2.523E+02  0.000E+00  0.000E+00  0.000E+00  3.234E+03  2.251E+00  0.000E+00   0.0E+00
    5   20  2.473E+02  0.000E+00  0.000E+00  0.000E+00  8.139E+00  0.000E+00  0.000E+00   0.0E+00
    5   21  2.422E+02  0.000E+00  0.000E+00  0.000E+00  2.163E+01  1.283E-01  0.000E+00   0.0E+00
    5   22  2.391E+02  0.000E+00  0.000E+00  0.000E+00  1.625E+04  0.000E+00  0.000E+00   0.0E+00
    5   23  2.291E+02  0.000E+00  0.000E+00  0.000E+00  2.365E+04  3.559E-01  0.000E+00   0.0E+00
    5   24  2.252E+02  0.000E+00  0.000E+00  0.000E+00  1.100E+05  2.047E-01  0.000E+00   0.0E+00
    5   25  2.232E+02  0.000E+00  0.000E+00  0.000E+00  1.267E+05  5.227E+00  0.000E+00   0.0E+00
    5   26  2.228E+02  0.000E+00  0.000E+00  0.000E+00  2.328E+05  0.000E+00  0.000E+00   0.0E+00
    5   27  2.027E+02  0.000E+00  0.000E+00  0.000E+00  3.928E+05  1.828E+00  0.000E+00   0.0E+00
    5   28  1.345E+02  1.211E+10  3.286E-02  4.366E-02  0.000E+00  0.000E+00  2.458E+01   5.2E-01
    5   29  1.281E+02  3.476E+10  2.850E-02  3.606E-02  0.000E+00  0.000E+00  0.000E+00   4.7E-01
    5   30  1.075E+02  0.000E+00  0.000E+00  0.000E+00  0.000E+00  2.213E-01  0.000E+00   0.0E+00
    5   31  1.073E+02  0.000E+00  0.000E+00  0.000E+00  2.500E+03  1.612E+00  0.000E+00   0.0E+00
    5   32  1.067E+02  0.000E+00  0.000E+00  0.000E+00  6.764E+02  1.301E+01  0.000E+00   0.0E+00
    5   33  1.052E+02  0.000E+00  0.000E+00  0.000E+00  1.987E+04  3.925E-03  0.000E+00   0.0E+00
    5   34  9.473E+01  0.000E+00  0.000E+00  0.000E+00  2.215E+03  1.092E+00  0.000E+00   0.0E+00
    5   35  9.447E+01  0.000E+00  0.000E+00  0.000E+00  2.623E+04  5.502E-02  0.000E+00   0.0E+00
    5   36  9.150E+01  0.000E+00  0.000E+00  0.000E+00  0.000E+00  1.260E+00  0.000E+00   0.0E+00
    5   37  9.135E+01  0.000E+00  0.000E+00  0.000E+00  9.379E+03  1.999E+00  0.000E+00   0.0E+00
    5   38  8.898E+01  1.020E+08  1.210E-04  1.064E-04  0.000E+00  0.000E+00  3.678E+01   1.1E+00
    5   39  8.865E+01  8.068E+08  1.584E-03  1.387E-03  0.000E+00  0.000E+00  5.087E+00   9.8E-01
    5   40  8.865E+01  0.000E+00  0.000E+00  0.000E+00  0.000E+00  0.000E+00  3.608E+01   0.0E+00
    5   41  8.826E+01  1.657E+09  1.935E-03  1.687E-03  0.000E+00  0.000E+00  3.344E+00   8.2E-01
    5   42  8.808E+01  2.569E+09  4.980E-03  4.332E-03  0.000E+00  0.000E+00  1.104E+01   8.8E-01
    5   43  8.676E+01  6.739E+09  2.535E-03  2.172E-03  0.000E+00  0.000E+00  0.000E+00   1.0E+00
    5   44  8.612E+01  2.137E+10  2.376E-02  2.021E-02  0.000E+00  0.000E+00  4.188E+01   9.7E-01
    5   45  8.575E+01  4.257E+10  7.822E-02  6.625E-02  0.000E+00  0.000E+00  3.415E+02   9.9E-01
    5   46  8.549E+01  3.232E+10  3.542E-02  2.990E-02  0.000E+00  0.000E+00  7.142E+02   1.0E+00
    5   47  8.482E+01  0.000E+00  0.000E+00  0.000E+00  0.000E+00  0.000E+00  9.845E-01   0.0E+00
    5   48  8.470E+01  4.027E+09  4.331E-03  3.624E-03  0.000E+00  0.000E+00  2.121E+01   9.7E-01
    5   49  8.471E+01  1.275E+10  2.285E-02  1.912E-02  0.000E+00  0.000E+00  1.284E+02   9.8E-01
    5   50  8.336E+01  4.082E+10  1.418E-02  1.167E-02  0.000E+00  0.000E+00  0.000E+00   1.1E+00
    5   51  8.311E+01  1.169E+09  2.018E-03  1.656E-03  0.000E+00  0.000E+00  2.547E+01   1.2E+00
    5   52  8.220E+01  0.000E+00  0.000E+00  0.000E+00  0.000E+00  2.483E-03  0.000E+00   0.0E+00
    5   53  8.206E+01  0.000E+00  0.000E+00  0.000E+00  1.808E+05  3.688E-03  0.000E+00   0.0E+00
    5   55  8.183E+01  0.000E+00  0.000E+00  0.000E+00  6.199E+01  3.448E-02  0.000E+00   0.0E+00
    5   56  8.174E+01  0.000E+00  0.000E+00  0.000E+00  2.580E+05  0.000E+00  0.000E+00   0.0E+00
    5   57  8.152E+01  0.000E+00  0.000E+00  0.000E+00  4.997E+05  3.638E-02  0.000E+00   0.0E+00
    5   58  8.141E+01  0.000E+00  0.000E+00  0.000E+00  1.072E+06  0.000E+00  0.000E+00   0.0E+00
    5   59  8.062E+01  0.000E+00  0.000E+00  0.000E+00  3.638E+05  1.426E-01  0.000E+00   0.0E+00
    5   62  7.932E+01  0.000E+00  0.000E+00  0.000E+00  1.216E+07  7.627E-03  0.000E+00   0.0E+00
    5   63  7.921E+01  0.000E+00  0.000E+00  0.000E+00  0.000E+00  0.000E+00  2.209E-01   0.0E+00
    5   65  7.926E+01  0.000E+00  0.000E+00  0.000E+00  1.241E+07  2.743E-02  0.000E+00   0.0E+00
    5   66  7.918E+01  0.000E+00  0.000E+00  0.000E+00  2.399E+07  0.000E+00  0.000E+00   0.0E+00
    5   67  7.908E+01  7.041E+07  1.100E-04  8.593E-05  0.000E+00  0.000E+00  1.009E+00   8.8E-01
    5   68  7.907E+01  0.000E+00  0.000E+00  0.000E+00  0.000E+00  0.000E+00  4.563E+00   0.0E+00
    5   69  7.900E+01  3.338E+06  3.123E-06  2.436E-06  0.000E+00  0.000E+00  3.310E-02   1.0E+00
    5   70  7.900E+01  1.549E+08  2.415E-04  1.884E-04  0.000E+00  0.000E+00  3.425E+00   9.1E-01
    5   71  7.826E+01  0.000E+00  0.000E+00  0.000E+00  2.326E+07  1.777E-01  0.000E+00   0.0E+00
    5   72  7.701E+01  0.000E+00  0.000E+00  0.000E+00  0.000E+00  0.000E+00  9.035E-02   0.0E+00
    5   74  7.685E+01  6.792E+07  1.002E-04  7.606E-05  0.000E+00  0.000E+00  1.825E-01   9.2E-01
    5   75  7.683E+01  0.000E+00  0.000E+00  0.000E+00  0.000E+00  0.000E+00  2.981E-01   0.0E+00
    5   76  6.596E+01  0.000E+00  0.000E+00  0.000E+00  1.215E+03  1.355E+00  0.000E+00   0.0E+00
    5   77  6.588E+01  0.000E+00  0.000E+00  0.000E+00  1.511E+03  2.142E-02  0.000E+00   0.0E+00
    5   78  6.451E+01  1.993E+05  1.244E-07  7.924E-08  0.000E+00  0.000E+00  1.701E+01   7.2E+00
    5   79  6.439E+01  8.599E+08  8.908E-04  5.665E-04  0.000E+00  0.000E+00  1.129E+00   9.7E-01
    5   80  6.438E+01  0.000E+00  0.000E+00  0.000E+00  0.000E+00  0.000E+00  3.995E+01   0.0E+00
    5   81  6.431E+01  1.849E+09  1.146E-03  7.282E-04  0.000E+00  0.000E+00  5.022E+00   7.7E-01
    5   82  6.435E+01  0.000E+00  0.000E+00  0.000E+00  0.000E+00  3.497E+00  0.000E+00   0.0E+00
    5   83  6.427E+01  1.274E+09  1.315E-03  8.347E-04  0.000E+00  0.000E+00  1.660E+01   8.3E-01
    5   84  6.432E+01  0.000E+00  0.000E+00  0.000E+00  4.493E+02  3.233E+00  0.000E+00   0.0E+00
    5   85  6.380E+01  1.641E+08  3.338E-05  2.104E-05  0.000E+00  0.000E+00  0.000E+00   5.6E-01
    5   86  6.289E+01  2.279E+10  1.351E-02  8.392E-03  0.000E+00  0.000E+00  4.547E-01   9.5E-01
    5   87  6.283E+01  1.132E+10  6.696E-03  4.155E-03  0.000E+00  0.000E+00  8.663E+02   9.8E-01
    5   88  6.280E+01  3.319E+10  3.271E-02  2.029E-02  0.000E+00  0.000E+00  5.324E+02   9.9E-01
    5   89  6.270E+01  0.000E+00  0.000E+00  0.000E+00  0.000E+00  2.501E-05  0.000E+00   0.0E+00
    5   90  6.265E+01  0.000E+00  0.000E+00  0.000E+00  1.129E+04  1.411E-02  0.000E+00   0.0E+00
    5   92  6.259E+01  0.000E+00  0.000E+00  0.000E+00  7.579E+04  2.256E-02  0.000E+00   0.0E+00
    5   93  6.257E+01  0.000E+00  0.000E+00  0.000E+00  3.132E+05  0.000E+00  0.000E+00   0.0E+00
    5   94  6.251E+01  0.000E+00  0.000E+00  0.000E+00  5.009E+05  1.910E-02  0.000E+00   0.0E+00
    5   95  6.248E+01  0.000E+00  0.000E+00  0.000E+00  5.130E+05  0.000E+00  0.000E+00   0.0E+00
    5   96  6.239E+01  3.059E+10  5.950E-03  3.667E-03  0.000E+00  0.000E+00  0.000E+00   1.1E+00
    5   97  6.219E+01  0.000E+00  0.000E+00  0.000E+00  1.048E+05  7.019E-02  0.000E+00   0.0E+00
    5   98  6.186E+01  2.282E+07  1.310E-05  8.001E-06  0.000E+00  0.000E+00  1.254E-02   9.0E-01
    5  101  6.185E+01  1.375E+08  1.314E-04  8.030E-05  0.000E+00  0.000E+00  5.378E+00   9.9E-01
    5  102  6.182E+01  0.000E+00  0.000E+00  0.000E+00  0.000E+00  0.000E+00  3.339E+00   0.0E+00
    5  103  6.181E+01  4.924E+07  4.701E-05  2.870E-05  0.000E+00  0.000E+00  2.196E+00   1.1E+00
    5  104  6.181E+01  0.000E+00  0.000E+00  0.000E+00  5.532E+03  1.157E-04  0.000E+00   0.0E+00
    5  105  6.181E+01  0.000E+00  0.000E+00  0.000E+00  0.000E+00  0.000E+00  2.718E-01   0.0E+00
    5  106  6.181E+01  0.000E+00  0.000E+00  0.000E+00  4.192E+04  0.000E+00  0.000E+00   0.0E+00
    5  110  6.178E+01  0.000E+00  0.000E+00  0.000E+00  5.592E+03  0.000E+00  0.000E+00   0.0E+00
    5  114  6.114E+01  0.000E+00  0.000E+00  0.000E+00  7.624E+06  3.426E-02  0.000E+00   0.0E+00
    5  115  6.113E+01  0.000E+00  0.000E+00  0.000E+00  6.465E+06  8.012E-04  0.000E+00   0.0E+00
    5  116  6.110E+01  0.000E+00  0.000E+00  0.000E+00  1.389E+07  0.000E+00  0.000E+00   0.0E+00
    5  117  6.087E+01  0.000E+00  0.000E+00  0.000E+00  1.480E+07  6.555E-02  0.000E+00   0.0E+00
    5  118  6.043E+01  0.000E+00  0.000E+00  0.000E+00  0.000E+00  0.000E+00  5.259E-02   0.0E+00
    5  120  6.041E+01  0.000E+00  0.000E+00  0.000E+00  0.000E+00  0.000E+00  1.422E-01   0.0E+00
    5  121  6.041E+01  2.060E+07  1.878E-05  1.121E-05  0.000E+00  0.000E+00  1.772E-01   1.2E+00
    5  122  6.037E+01  0.000E+00  0.000E+00  0.000E+00  3.160E+03  0.000E+00  0.000E+00   0.0E+00
    6    7  3.791E+03  0.000E+00  0.000E+00  0.000E+00  4.051E-02  3.236E+00  0.000E+00   0.0E+00
    6    8  3.612E+03  0.000E+00  0.000E+00  0.000E+00  1.332E-01  0.000E+00  0.000E+00   0.0E+00
    6    9  2.720E+03  0.000E+00  0.000E+00  0.000E+00  6.786E-02  4.756E+00  0.000E+00   0.0E+00
    6   10  2.264E+03  0.000E+00  0.000E+00  0.000E+00  1.734E-02  5.483E+01  0.000E+00   0.0E+00
    6   11  1.593E+03  0.000E+00  0.000E+00  0.000E+00  5.538E-01  4.922E+01  0.000E+00   0.0E+00
    6   12  1.575E+03  0.000E+00  0.000E+00  0.000E+00  0.000E+00  9.612E+02  0.000E+00   0.0E+00
    6   13  1.347E+03  0.000E+00  0.000E+00  0.000E+00  5.687E-02  4.439E+02  0.000E+00   0.0E+00
    6   14  1.350E+03  0.000E+00  0.000E+00  0.000E+00  6.510E-01  6.192E+01  0.000E+00   0.0E+00
    6   15  5.569E+02  0.000E+00  0.000E+00  0.000E+00  0.000E+00  3.174E+02  0.000E+00   0.0E+00
    6   16  3.786E+02  6.872E+09  4.923E-02  1.841E-01  0.000E+00  0.000E+00  0.000E+00   1.1E+00
    6   17  3.733E+02  6.036E+09  1.261E-01  4.650E-01  0.000E+00  0.000E+00  1.480E+00   1.0E+00
    6   18  3.630E+02  4.214E+09  1.388E-01  4.977E-01  0.000E+00  0.000E+00  1.395E+00   1.0E+00
    6   20  3.529E+02  0.000E+00  0.000E+00  0.000E+00  0.000E+00  0.000E+00  9.035E-02   0.0E+00
    6   21  3.425E+02  4.372E+07  1.282E-03  4.336E-03  0.000E+00  0.000E+00  4.225E-01   1.0E+00
    6   22  3.363E+02  0.000E+00  0.000E+00  0.000E+00  0.000E+00  0.000E+00  5.652E-01   0.0E+00
    6   23  3.168E+02  1.230E+05  1.850E-06  5.788E-06  0.000E+00  0.000E+00  6.252E+00   2.6E+00
    6   24  3.095E+02  1.151E+07  2.756E-04  8.425E-04  0.000E+00  0.000E+00  2.075E-01   1.0E+00
    6   25  3.057E+02  5.910E+07  1.380E-03  4.167E-03  0.000E+00  0.000E+00  8.859E-01   1.0E+00
    6   26  3.050E+02  0.000E+00  0.000E+00  0.000E+00  0.000E+00  0.000E+00  3.484E-01   0.0E+00
    6   27  2.685E+02  1.120E+07  1.211E-04  3.210E-04  0.000E+00  0.000E+00  1.060E+01   2.8E-01
    6   28  1.607E+02  0.000E+00  0.000E+00  0.000E+00  7.124E+00  4.067E+00  0.000E+00   0.0E+00
    6   29  1.516E+02  0.000E+00  0.000E+00  0.000E+00  0.000E+00  7.106E-01  0.000E+00   0.0E+00
    6   30  1.236E+02  2.070E+10  1.579E-02  1.927E-02  0.000E+00  0.000E+00  0.000E+00   5.7E-01
    6   31  1.233E+02  1.085E+10  2.473E-02  3.012E-02  0.000E+00  0.000E+00  8.520E+01   5.8E-01
    6   32  1.225E+02  5.385E+09  2.019E-02  2.443E-02  0.000E+00  0.000E+00  6.235E+01   5.9E-01
    6   33  1.206E+02  1.417E+09  3.088E-03  3.676E-03  0.000E+00  0.000E+00  5.048E+01   5.7E-01
    6   34  1.070E+02  1.703E+10  4.871E-02  5.147E-02  0.000E+00  0.000E+00  1.031E+02   1.1E+00
    6   35  1.067E+02  3.202E+09  5.460E-03  5.752E-03  0.000E+00  0.000E+00  1.092E+01   1.2E+00
    6   36  1.029E+02  3.219E+09  1.702E-03  1.730E-03  0.000E+00  0.000E+00  0.000E+00   1.3E+00
    6   37  1.027E+02  2.204E+09  3.484E-03  3.534E-03  0.000E+00  0.000E+00  6.294E+01   1.2E+00
    6   38  9.971E+01  0.000E+00  0.000E+00  0.000E+00  2.592E+04  6.402E+00  0.000E+00   0.0E+00
    6   39  9.929E+01  0.000E+00  0.000E+00  0.000E+00  1.139E+06  9.123E+00  0.000E+00   0.0E+00
    6   40  9.929E+01  0.000E+00  0.000E+00  0.000E+00  3.080E+06  0.000E+00  0.000E+00   0.0E+00
    6   41  9.881E+01  0.000E+00  0.000E+00  0.000E+00  3.019E+05  9.985E+01  0.000E+00   0.0E+00
    6   42  9.857E+01  0.000E+00  0.000E+00  0.000E+00  7.272E+04  7.827E+01  0.000E+00   0.0E+00
    6   43  9.692E+01  0.000E+00  0.000E+00  0.000E+00  0.000E+00  1.107E+02  0.000E+00   0.0E+00
    6   44  9.613E+01  0.000E+00  0.000E+00  0.000E+00  1.048E+04  1.682E+01  0.000E+00   0.0E+00
    6   45  9.567E+01  0.000E+00  0.000E+00  0.000E+00  6.849E+04  6.881E+00  0.000E+00   0.0E+00
    6   46  9.535E+01  0.000E+00  0.000E+00  0.000E+00  1.143E+04  3.286E-01  0.000E+00   0.0E+00
    6   47  9.452E+01  0.000E+00  0.000E+00  0.000E+00  2.554E+06  0.000E+00  0.000E+00   0.0E+00
    6   48  9.437E+01  0.000E+00  0.000E+00  0.000E+00  4.647E+06  6.569E-03  0.000E+00   0.0E+00
    6   49  9.437E+01  0.000E+00  0.000E+00  0.000E+00  3.530E+06  5.748E-01  0.000E+00   0.0E+00
    6   50  9.271E+01  0.000E+00  0.000E+00  0.000E+00  0.000E+00  2.167E+01  0.000E+00   0.0E+00
    6   51  9.240E+01  0.000E+00  0.000E+00  0.000E+00  6.888E+04  2.231E-03  0.000E+00   0.0E+00
    6   52  9.127E+01  9.787E+10  4.074E-02  3.672E-02  0.000E+00  0.000E+00  0.000E+00   9.9E-01
    6   53  9.110E+01  8.004E+10  9.959E-02  8.960E-02  0.000E+00  0.000E+00  2.485E+02   1.0E+00
    6   55  9.082E+01  4.737E+10  9.764E-02  8.758E-02  0.000E+00  0.000E+00  1.949E+02   1.0E+00
    6   56  9.070E+01  0.000E+00  0.000E+00  0.000E+00  0.000E+00  0.000E+00  1.744E+01   0.0E+00
    6   57  9.043E+01  3.222E+08  6.584E-04  5.880E-04  0.000E+00  0.000E+00  6.798E+01   9.8E-01
    6   58  9.030E+01  0.000E+00  0.000E+00  0.000E+00  0.000E+00  0.000E+00  7.305E+01   0.0E+00
    6   59  8.933E+01  8.470E+08  1.013E-03  8.939E-04  0.000E+00  0.000E+00  7.677E+02   1.1E+00
    6   62  8.773E+01  8.711E+07  1.675E-04  1.452E-04  0.000E+00  0.000E+00  2.830E+00   1.0E+00
    6   63  8.760E+01  0.000E+00  0.000E+00  0.000E+00  2.848E+05  0.000E+00  0.000E+00   0.0E+00
    6   65  8.766E+01  5.460E+09  1.048E-02  9.075E-03  0.000E+00  0.000E+00  1.428E+02   1.0E+00
    6   66  8.756E+01  0.000E+00  0.000E+00  0.000E+00  0.000E+00  0.000E+00  1.421E+01   0.0E+00
    6   67  8.744E+01  0.000E+00  0.000E+00  0.000E+00  6.413E+06  6.690E-02  0.000E+00   0.0E+00
    6   68  8.743E+01  0.000E+00  0.000E+00  0.000E+00  1.195E+07  0.000E+00  0.000E+00   0.0E+00
    6   69  8.734E+01  0.000E+00  0.000E+00  0.000E+00  3.259E+07  5.697E-02  0.000E+00   0.0E+00
    6   70  8.734E+01  0.000E+00  0.000E+00  0.000E+00  1.736E+07  4.935E-03  0.000E+00   0.0E+00
    6   71  8.644E+01  5.417E+08  6.069E-04  5.181E-04  0.000E+00  0.000E+00  7.558E+01   8.6E-01
    6   72  8.492E+01  0.000E+00  0.000E+00  0.000E+00  4.002E+03  0.000E+00  0.000E+00   0.0E+00
    6   74  8.472E+01  0.000E+00  0.000E+00  0.000E+00  2.000E+06  3.256E-02  0.000E+00   0.0E+00
    6   75  8.470E+01  0.000E+00  0.000E+00  0.000E+00  4.861E+06  0.000E+00  0.000E+00   0.0E+00
    6   76  7.167E+01  8.154E+09  1.047E-02  7.408E-03  0.000E+00  0.000E+00  7.819E+01   1.1E+00
    6   77  7.158E+01  1.563E+09  1.200E-03  8.487E-04  0.000E+00  0.000E+00  1.695E+01   1.2E+00
    6   78  6.997E+01  0.000E+00  0.000E+00  0.000E+00  1.720E+04  3.859E+00  0.000E+00   0.0E+00
    6   79  6.983E+01  0.000E+00  0.000E+00  0.000E+00  7.983E+05  8.823E+00  0.000E+00   0.0E+00
    6   80  6.981E+01  0.000E+00  0.000E+00  0.000E+00  2.067E+06  0.000E+00  0.000E+00   0.0E+00
    6   81  6.973E+01  0.000E+00  0.000E+00  0.000E+00  2.224E+05  7.698E+01  0.000E+00   0.0E+00
    6   82  6.978E+01  1.999E+09  4.864E-04  3.352E-04  0.000E+00  0.000E+00  0.000E+00   1.3E+00
    6   83  6.968E+01  0.000E+00  0.000E+00  0.000E+00  3.202E+04  5.390E+01  0.000E+00   0.0E+00
    6   84  6.974E+01  1.390E+09  1.013E-03  6.980E-04  0.000E+00  0.000E+00  5.543E+01   1.2E+00
    6   85  6.913E+01  0.000E+00  0.000E+00  0.000E+00  0.000E+00  4.492E+01  0.000E+00   0.0E+00
    6   86  6.806E+01  0.000E+00  0.000E+00  0.000E+00  3.364E+05  6.633E+00  0.000E+00   0.0E+00
    6   87  6.799E+01  0.000E+00  0.000E+00  0.000E+00  3.185E+04  5.117E-02  0.000E+00   0.0E+00
    6   88  6.796E+01  0.000E+00  0.000E+00  0.000E+00  2.132E+05  3.524E+00  0.000E+00   0.0E+00
    6   89  6.784E+01  5.859E+10  1.347E-02  9.029E-03  0.000E+00  0.000E+00  0.000E+00   9.9E-01
    6   90  6.779E+01  4.679E+10  3.223E-02  2.158E-02  0.000E+00  0.000E+00  2.218E+02   1.0E+00
    6   92  6.771E+01  2.672E+10  3.061E-02  2.047E-02  0.000E+00  0.000E+00  1.701E+02   1.0E+00
    6   93  6.769E+01  0.000E+00  0.000E+00  0.000E+00  0.000E+00  0.000E+00  2.101E+01   0.0E+00
    6   94  6.762E+01  1.812E+08  2.071E-04  1.383E-04  0.000E+00  0.000E+00  7.977E+01   9.6E-01
    6   95  6.758E+01  0.000E+00  0.000E+00  0.000E+00  0.000E+00  0.000E+00  8.336E+01   0.0E+00
    6   96  6.748E+01  0.000E+00  0.000E+00  0.000E+00  0.000E+00  2.921E+01  0.000E+00   0.0E+00
    6   97  6.725E+01  8.096E+08  5.489E-04  3.646E-04  0.000E+00  0.000E+00  1.053E+03   1.1E+00
    6   98  6.686E+01  0.000E+00  0.000E+00  0.000E+00  7.721E+06  1.251E-01  0.000E+00   0.0E+00
    6  101  6.685E+01  0.000E+00  0.000E+00  0.000E+00  5.009E+06  7.542E-03  0.000E+00   0.0E+00
    6  102  6.681E+01  0.000E+00  0.000E+00  0.000E+00  2.991E+06  0.000E+00  0.000E+00   0.0E+00
    6  103  6.681E+01  0.000E+00  0.000E+00  0.000E+00  6.611E+05  4.188E-02  0.000E+00   0.0E+00
    6  104  6.680E+01  1.494E+01  1.666E-11  1.099E-11  0.000E+00  0.000E+00  5.221E-03   1.1E+02
    6  105  6.680E+01  0.000E+00  0.000E+00  0.000E+00  1.933E+04  0.000E+00  0.000E+00   0.0E+00
    6  106  6.680E+01  0.000E+00  0.000E+00  0.000E+00  0.000E+00  0.000E+00  1.003E-02   0.0E+00
    6  110  6.676E+01  0.000E+00  0.000E+00  0.000E+00  0.000E+00  0.000E+00  5.904E-04   0.0E+00
    6  114  6.602E+01  1.269E+08  1.382E-04  9.009E-05  0.000E+00  0.000E+00  4.002E-01   1.0E+00
    6  115  6.600E+01  4.829E+09  5.257E-03  3.427E-03  0.000E+00  0.000E+00  1.787E+02   1.0E+00
    6  116  6.597E+01  0.000E+00  0.000E+00  0.000E+00  0.000E+00  0.000E+00  1.351E+01   0.0E+00
    6  117  6.570E+01  9.770E+08  6.322E-04  4.103E-04  0.000E+00  0.000E+00  2.242E+01   9.6E-01
    6  118  6.519E+01  0.000E+00  0.000E+00  0.000E+00  2.579E+03  0.000E+00  0.000E+00   0.0E+00
    6  120  6.517E+01  0.000E+00  0.000E+00  0.000E+00  1.021E+06  0.000E+00  0.000E+00   0.0E+00
    6  121  6.517E+01  0.000E+00  0.000E+00  0.000E+00  3.956E+05  1.767E-02  0.000E+00   0.0E+00
    6  122  6.513E+01  0.000E+00  0.000E+00  0.000E+00  0.000E+00  0.000E+00  3.806E-04   0.0E+00
    7    8  7.645E+04  0.000E+00  0.000E+00  0.000E+00  2.118E-08  2.641E-02  0.000E+00   0.0E+00
    7    9  9.625E+03  0.000E+00  0.000E+00  0.000E+00  1.155E-03  1.696E+01  0.000E+00   0.0E+00
    7   10  5.619E+03  0.000E+00  0.000E+00  0.000E+00  2.110E-02  1.498E+01  0.000E+00   0.0E+00
    7   11  2.747E+03  0.000E+00  0.000E+00  0.000E+00  5.537E-02  6.230E+02  0.000E+00   0.0E+00
    7   12  2.694E+03  0.000E+00  0.000E+00  0.000E+00  1.202E+00  0.000E+00  0.000E+00   0.0E+00
    7   13  2.090E+03  0.000E+00  0.000E+00  0.000E+00  5.091E-02  9.710E+00  0.000E+00   0.0E+00
    7   14  2.096E+03  0.000E+00  0.000E+00  0.000E+00  1.380E-01  4.132E-01  0.000E+00   0.0E+00
    7   15  6.529E+02  0.000E+00  0.000E+00  0.000E+00  4.416E+02  0.000E+00  0.000E+00   0.0E+00
    7   16  4.206E+02  0.000E+00  0.000E+00  0.000E+00  0.000E+00  0.000E+00  9.189E-02   0.0E+00
    7   17  4.141E+02  4.086E+08  6.303E-03  4.296E-02  0.000E+00  0.000E+00  2.347E-01   1.2E+00
    7   18  4.015E+02  3.285E+08  7.938E-03  5.247E-02  0.000E+00  0.000E+00  2.178E-01   1.0E+00
    7   19  3.965E+02  0.000E+00  0.000E+00  0.000E+00  0.000E+00  0.000E+00  1.542E+00   0.0E+00
    7   20  3.891E+02  7.123E+09  2.263E-01  1.449E+00  0.000E+00  0.000E+00  1.751E-01   1.1E+00
    7   21  3.765E+02  3.101E+09  6.592E-02  4.085E-01  0.000E+00  0.000E+00  7.577E-03   1.0E+00
    7   22  3.691E+02  1.004E+08  2.870E-03  1.743E-02  0.000E+00  0.000E+00  1.061E+00   9.5E-01
    7   23  3.457E+02  5.452E+08  5.860E-03  3.334E-02  0.000E+00  0.000E+00  8.283E-03   1.1E+00
    7   24  3.371E+02  2.117E+08  3.607E-03  2.001E-02  0.000E+00  0.000E+00  5.496E-03   8.6E-01
    7   25  3.325E+02  2.670E+08  4.426E-03  2.423E-02  0.000E+00  0.000E+00  5.020E-01   9.8E-01
    7   26  3.316E+02  1.179E+04  2.722E-07  1.486E-06  0.000E+00  0.000E+00  1.283E-01   7.8E+00
    7   27  2.890E+02  3.166E+06  2.378E-05  1.131E-04  0.000E+00  0.000E+00  1.251E-02   2.9E+00
    7   28  1.678E+02  0.000E+00  0.000E+00  0.000E+00  5.580E+03  3.683E+00  0.000E+00   0.0E+00
    7   29  1.579E+02  0.000E+00  0.000E+00  0.000E+00  1.015E+04  0.000E+00  0.000E+00   0.0E+00
    7   30  1.277E+02  0.000E+00  0.000E+00  0.000E+00  0.000E+00  0.000E+00  4.049E+02   0.0E+00
    7   31  1.275E+02  5.040E+10  7.365E-02  1.545E-01  0.000E+00  0.000E+00  1.673E+02   5.3E-01
    7   32  1.266E+02  1.716E+09  4.122E-03  8.590E-03  0.000E+00  0.000E+00  1.537E+00   5.1E-01
    7   33  1.245E+02  5.891E+09  8.217E-03  1.684E-02  0.000E+00  0.000E+00  3.749E+01   5.6E-01
    7   34  1.101E+02  1.525E+10  2.771E-02  5.021E-02  0.000E+00  0.000E+00  5.286E-01   1.1E+00
    7   35  1.097E+02  2.818E+10  3.053E-02  5.514E-02  0.000E+00  0.000E+00  1.148E+00   1.1E+00
    7   36  1.057E+02  0.000E+00  0.000E+00  0.000E+00  0.000E+00  0.000E+00  4.585E+01   0.0E+00
    7   37  1.056E+02  2.326E+08  2.330E-04  4.049E-04  0.000E+00  0.000E+00  1.691E+01   1.8E+00
    7   38  1.024E+02  0.000E+00  0.000E+00  0.000E+00  2.434E+06  2.298E+00  0.000E+00   0.0E+00
    7   39  1.020E+02  0.000E+00  0.000E+00  0.000E+00  7.604E+04  1.332E+00  0.000E+00   0.0E+00
    7   40  1.020E+02  0.000E+00  0.000E+00  0.000E+00  2.228E+06  1.618E+02  0.000E+00   0.0E+00
    7   41  1.014E+02  0.000E+00  0.000E+00  0.000E+00  3.804E+06  2.063E+01  0.000E+00   0.0E+00
    7   42  1.012E+02  0.000E+00  0.000E+00  0.000E+00  4.225E+06  9.533E+01  0.000E+00   0.0E+00
    7   43  9.947E+01  0.000E+00  0.000E+00  0.000E+00  6.286E+06  0.000E+00  0.000E+00   0.0E+00
    7   44  9.863E+01  0.000E+00  0.000E+00  0.000E+00  3.530E+04  3.294E+01  0.000E+00   0.0E+00
    7   45  9.815E+01  0.000E+00  0.000E+00  0.000E+00  2.202E+04  5.031E-01  0.000E+00   0.0E+00
    7   46  9.781E+01  0.000E+00  0.000E+00  0.000E+00  3.333E+04  9.375E-01  0.000E+00   0.0E+00
    7   47  9.693E+01  0.000E+00  0.000E+00  0.000E+00  3.000E+04  1.816E+00  0.000E+00   0.0E+00
    7   48  9.678E+01  0.000E+00  0.000E+00  0.000E+00  4.945E+05  1.109E+00  0.000E+00   0.0E+00
    7   49  9.678E+01  0.000E+00  0.000E+00  0.000E+00  4.748E+05  3.212E-01  0.000E+00   0.0E+00
    7   50  9.503E+01  0.000E+00  0.000E+00  0.000E+00  7.837E+05  0.000E+00  0.000E+00   0.0E+00
    7   51  9.471E+01  0.000E+00  0.000E+00  0.000E+00  1.665E+05  1.229E+00  0.000E+00   0.0E+00
    7   52  9.352E+01  0.000E+00  0.000E+00  0.000E+00  0.000E+00  0.000E+00  4.805E+01   0.0E+00
    7   53  9.334E+01  1.103E+10  8.643E-03  1.328E-02  0.000E+00  0.000E+00  7.267E+01   9.4E-01
    7   54  9.311E+01  0.000E+00  0.000E+00  0.000E+00  0.000E+00  0.000E+00  4.208E+02   0.0E+00
    7   55  9.305E+01  6.130E+09  7.957E-03  1.219E-02  0.000E+00  0.000E+00  8.770E+01   1.0E+00
    7   56  9.292E+01  1.049E+11  1.900E-01  2.906E-01  0.000E+00  0.000E+00  3.636E+01   9.8E-01
    7   57  9.264E+01  4.029E+10  5.184E-02  7.906E-02  0.000E+00  0.000E+00  2.873E+00   1.0E+00
    7   58  9.250E+01  1.279E+09  2.297E-03  3.498E-03  0.000E+00  0.000E+00  1.800E+02   1.0E+00
    7   59  9.149E+01  3.665E+09  2.759E-03  4.155E-03  0.000E+00  0.000E+00  1.236E-01   9.6E-01
    7   61  8.989E+01  0.000E+00  0.000E+00  0.000E+00  4.012E+07  0.000E+00  0.000E+00   0.0E+00
    7   62  8.981E+01  2.268E+07  2.742E-05  4.054E-05  0.000E+00  0.000E+00  1.614E-01   4.1E-01
    7   63  8.967E+01  0.000E+00  0.000E+00  0.000E+00  2.197E+07  8.518E-02  0.000E+00   0.0E+00
    7   64  8.966E+01  0.000E+00  0.000E+00  0.000E+00  6.905E+05  0.000E+00  0.000E+00   0.0E+00
    7   65  8.974E+01  9.104E+08  1.099E-03  1.623E-03  0.000E+00  0.000E+00  2.834E+01   1.0E+00
    7   66  8.963E+01  1.141E+09  1.923E-03  2.838E-03  0.000E+00  0.000E+00  3.466E+01   9.8E-01
    7   67  8.951E+01  0.000E+00  0.000E+00  0.000E+00  9.550E+06  2.631E-01  0.000E+00   0.0E+00
    7   68  8.949E+01  0.000E+00  0.000E+00  0.000E+00  1.113E+06  2.526E-05  0.000E+00   0.0E+00
    7   69  8.940E+01  0.000E+00  0.000E+00  0.000E+00  3.229E+06  7.619E-02  0.000E+00   0.0E+00
    7   70  8.940E+01  0.000E+00  0.000E+00  0.000E+00  9.560E+05  6.316E-03  0.000E+00   0.0E+00
    7   71  8.846E+01  2.650E+05  1.865E-07  2.715E-07  0.000E+00  0.000E+00  1.744E-01   1.6E+02
    7   72  8.687E+01  0.000E+00  0.000E+00  0.000E+00  5.668E+04  3.673E-03  0.000E+00   0.0E+00
    7   73  8.685E+01  0.000E+00  0.000E+00  0.000E+00  1.274E+06  0.000E+00  0.000E+00   0.0E+00
    7   74  8.666E+01  0.000E+00  0.000E+00  0.000E+00  9.184E+04  2.331E-01  0.000E+00   0.0E+00
    7   75  8.664E+01  0.000E+00  0.000E+00  0.000E+00  2.663E+05  1.214E-02  0.000E+00   0.0E+00
    7   76  7.305E+01  7.153E+09  5.723E-03  6.882E-03  0.000E+00  0.000E+00  6.881E-01   1.0E+00
    7   77  7.296E+01  1.465E+10  7.017E-03  8.427E-03  0.000E+00  0.000E+00  2.649E-04   1.1E+00
    7   78  7.128E+01  0.000E+00  0.000E+00  0.000E+00  1.580E+06  1.316E+00  0.000E+00   0.0E+00
    7   79  7.114E+01  0.000E+00  0.000E+00  0.000E+00  6.270E+04  8.409E-01  0.000E+00   0.0E+00
    7   80  7.112E+01  0.000E+00  0.000E+00  0.000E+00  1.282E+06  1.120E+02  0.000E+00   0.0E+00
    7   81  7.104E+01  0.000E+00  0.000E+00  0.000E+00  2.010E+06  2.236E+01  0.000E+00   0.0E+00
    7   82  7.109E+01  0.000E+00  0.000E+00  0.000E+00  0.000E+00  0.000E+00  2.469E+01   0.0E+00
    7   83  7.099E+01  0.000E+00  0.000E+00  0.000E+00  2.183E+06  6.545E+01  0.000E+00   0.0E+00
    7   84  7.105E+01  3.209E+08  1.457E-04  1.704E-04  0.000E+00  0.000E+00  1.247E+01   1.4E+00
    7   85  7.042E+01  0.000E+00  0.000E+00  0.000E+00  3.995E+06  0.000E+00  0.000E+00   0.0E+00
    7   86  6.931E+01  0.000E+00  0.000E+00  0.000E+00  9.738E+04  1.297E+01  0.000E+00   0.0E+00
    7   87  6.923E+01  0.000E+00  0.000E+00  0.000E+00  2.963E+04  2.343E-04  0.000E+00   0.0E+00
    7   88  6.920E+01  0.000E+00  0.000E+00  0.000E+00  4.103E+04  3.417E-01  0.000E+00   0.0E+00
    7   89  6.908E+01  0.000E+00  0.000E+00  0.000E+00  0.000E+00  0.000E+00  6.517E+01   0.0E+00
    7   90  6.903E+01  8.124E+09  3.482E-03  3.956E-03  0.000E+00  0.000E+00  7.758E+01   8.2E-01
    7   91  6.897E+01  0.000E+00  0.000E+00  0.000E+00  0.000E+00  0.000E+00  4.590E+02   0.0E+00
    7   92  6.894E+01  3.735E+09  2.662E-03  3.021E-03  0.000E+00  0.000E+00  9.911E+01   1.1E+00
    7   93  6.892E+01  6.261E+10  6.242E-02  7.081E-02  0.000E+00  0.000E+00  3.817E+01   9.8E-01
    7   94  6.885E+01  2.399E+10  1.705E-02  1.932E-02  0.000E+00  0.000E+00  2.386E+00   1.0E+00
    7   95  6.881E+01  8.251E+08  8.200E-04  9.288E-04  0.000E+00  0.000E+00  1.998E+02   1.1E+00
    7   96  6.871E+01  0.000E+00  0.000E+00  0.000E+00  2.150E+05  0.000E+00  0.000E+00   0.0E+00
    7   97  6.846E+01  2.108E+09  8.890E-04  1.002E-03  0.000E+00  0.000E+00  1.403E+00   8.9E-01
    7   98  6.806E+01  0.000E+00  0.000E+00  0.000E+00  9.153E+05  2.732E-01  0.000E+00   0.0E+00
    7  100  6.806E+01  0.000E+00  0.000E+00  0.000E+00  8.241E+06  0.000E+00  0.000E+00   0.0E+00
    7  101  6.805E+01  0.000E+00  0.000E+00  0.000E+00  5.556E+05  3.444E-02  0.000E+00   0.0E+00
    7  102  6.801E+01  0.000E+00  0.000E+00  0.000E+00  3.049E+05  4.745E-06  0.000E+00   0.0E+00
    7  103  6.800E+01  0.000E+00  0.000E+00  0.000E+00  1.815E+06  3.575E-02  0.000E+00   0.0E+00
    7  104  6.800E+01  7.137E+04  4.947E-08  5.537E-08  0.000E+00  0.000E+00  6.211E-02   5.7E+00
    7  105  6.800E+01  0.000E+00  0.000E+00  0.000E+00  4.245E+06  4.057E-02  0.000E+00   0.0E+00
    7  106  6.800E+01  2.877E+06  2.792E-06  3.124E-06  0.000E+00  0.000E+00  4.082E-02   1.6E+00
    7  107  6.799E+01  0.000E+00  0.000E+00  0.000E+00  1.214E+05  0.000E+00  0.000E+00   0.0E+00
    7  110  6.796E+01  3.149E+05  3.052E-07  3.414E-07  0.000E+00  0.000E+00  1.926E-02   3.0E-03
    7  111  6.796E+01  0.000E+00  0.000E+00  0.000E+00  0.000E+00  0.000E+00  1.577E-02   0.0E+00
    7  112  6.794E+01  0.000E+00  0.000E+00  0.000E+00  0.000E+00  0.000E+00  3.607E-02   0.0E+00
    7  114  6.719E+01  1.541E+08  1.043E-04  1.153E-04  0.000E+00  0.000E+00  2.829E-03   6.5E-01
    7  115  6.717E+01  3.969E+08  2.685E-04  2.969E-04  0.000E+00  0.000E+00  2.363E+01   9.5E-01
    7  116  6.714E+01  1.159E+09  1.097E-03  1.212E-03  0.000E+00  0.000E+00  4.385E+01   1.0E+00
    7  117  6.686E+01  1.096E+07  4.408E-06  4.851E-06  0.000E+00  0.000E+00  9.391E-03   6.0E+00
    7  118  6.633E+01  0.000E+00  0.000E+00  0.000E+00  3.602E+04  2.916E-04  0.000E+00   0.0E+00
    7  119  6.633E+01  0.000E+00  0.000E+00  0.000E+00  2.765E+05  0.000E+00  0.000E+00   0.0E+00
    7  120  6.632E+01  0.000E+00  0.000E+00  0.000E+00  9.472E+04  8.217E-03  0.000E+00   0.0E+00
    7  121  6.631E+01  0.000E+00  0.000E+00  0.000E+00  8.033E+03  1.418E-01  0.000E+00   0.0E+00
    7  122  6.626E+01  4.166E+05  3.840E-07  4.188E-07  0.000E+00  0.000E+00  1.266E-01   4.3E+00
    7  123  6.626E+01  0.000E+00  0.000E+00  0.000E+00  0.000E+00  0.000E+00  3.508E-04   0.0E+00
    7  124  6.626E+01  0.000E+00  0.000E+00  0.000E+00  0.000E+00  0.000E+00  1.548E-02   0.0E+00
    8    9  1.101E+04  0.000E+00  0.000E+00  0.000E+00  2.333E-04  0.000E+00  0.000E+00   0.0E+00
    8   10  6.065E+03  0.000E+00  0.000E+00  0.000E+00  1.557E-02  5.293E-01  0.000E+00   0.0E+00
    8   11  2.850E+03  0.000E+00  0.000E+00  0.000E+00  6.135E-03  0.000E+00  0.000E+00   0.0E+00
    8   13  2.148E+03  0.000E+00  0.000E+00  0.000E+00  9.691E-01  0.000E+00  0.000E+00   0.0E+00
    8   14  2.156E+03  0.000E+00  0.000E+00  0.000E+00  2.228E-01  8.490E+02  0.000E+00   0.0E+00
    8   17  4.164E+02  0.000E+00  0.000E+00  0.000E+00  0.000E+00  0.000E+00  2.522E-02   0.0E+00
    8   18  4.036E+02  1.859E+08  3.243E-03  3.016E-02  0.000E+00  0.000E+00  8.285E-01   1.2E+00
    8   19  3.986E+02  7.826E+09  2.397E-01  2.202E+00  0.000E+00  0.000E+00  5.303E+00   1.1E+00
    8   20  3.911E+02  1.228E+09  2.816E-02  2.538E-01  0.000E+00  0.000E+00  9.539E-03   1.0E+00
    8   21  3.784E+02  1.682E+08  2.579E-03  2.249E-02  0.000E+00  0.000E+00  2.386E-01   1.0E+00
    8   22  3.709E+02  1.746E+09  3.601E-02  3.078E-01  0.000E+00  0.000E+00  4.705E+00   9.9E-01
    8   23  3.472E+02  0.000E+00  0.000E+00  0.000E+00  0.000E+00  0.000E+00  6.674E-02   0.0E+00
    8   24  3.386E+02  1.962E+07  2.408E-04  1.879E-03  0.000E+00  0.000E+00  5.220E-02   9.1E-01
    8   25  3.340E+02  1.504E+08  1.796E-03  1.383E-02  0.000E+00  0.000E+00  2.957E-01   8.4E-01
    8   26  3.331E+02  2.449E+08  4.073E-03  3.127E-02  0.000E+00  0.000E+00  1.479E-01   8.9E-01
    8   27  2.900E+02  0.000E+00  0.000E+00  0.000E+00  0.000E+00  0.000E+00  3.331E-02   0.0E+00
    8   28  1.681E+02  0.000E+00  0.000E+00  0.000E+00  1.156E+04  0.000E+00  0.000E+00   0.0E+00
    8   31  1.277E+02  0.000E+00  0.000E+00  0.000E+00  0.000E+00  0.000E+00  2.812E+01   0.0E+00
    8   32  1.268E+02  5.490E+10  9.453E-02  2.762E-01  0.000E+00  0.000E+00  8.419E+01   5.3E-01
    8   33  1.247E+02  0.000E+00  0.000E+00  0.000E+00  0.000E+00  0.000E+00  2.961E+02   0.0E+00
    8   34  1.102E+02  4.093E+10  5.327E-02  1.354E-01  0.000E+00  0.000E+00  2.497E+02   1.1E+00
    8   35  1.099E+02  0.000E+00  0.000E+00  0.000E+00  0.000E+00  0.000E+00  4.806E+02   0.0E+00
    8   37  1.057E+02  0.000E+00  0.000E+00  0.000E+00  0.000E+00  0.000E+00  2.846E-02   0.0E+00
    8   38  1.025E+02  0.000E+00  0.000E+00  0.000E+00  1.011E+07  0.000E+00  0.000E+00   0.0E+00
    8   39  1.021E+02  0.000E+00  0.000E+00  0.000E+00  2.799E+06  3.196E+02  0.000E+00   0.0E+00
    8   40  1.021E+02  0.000E+00  0.000E+00  0.000E+00  2.848E+06  7.852E+00  0.000E+00   0.0E+00
    8   41  1.016E+02  0.000E+00  0.000E+00  0.000E+00  7.145E+05  0.000E+00  0.000E+00   0.0E+00
    8   42  1.013E+02  0.000E+00  0.000E+00  0.000E+00  4.151E+06  6.355E-04  0.000E+00   0.0E+00
    8   44  9.875E+01  0.000E+00  0.000E+00  0.000E+00  2.850E+04  0.000E+00  0.000E+00   0.0E+00
    8   45  9.828E+01  0.000E+00  0.000E+00  0.000E+00  1.971E+05  2.769E-01  0.000E+00   0.0E+00
    8   46  9.793E+01  0.000E+00  0.000E+00  0.000E+00  1.935E+05  0.000E+00  0.000E+00   0.0E+00
    8   47  9.706E+01  0.000E+00  0.000E+00  0.000E+00  6.174E+05  5.369E-01  0.000E+00   0.0E+00
    8   48  9.690E+01  0.000E+00  0.000E+00  0.000E+00  3.193E+04  0.000E+00  0.000E+00   0.0E+00
    8   49  9.690E+01  0.000E+00  0.000E+00  0.000E+00  2.348E+05  3.718E-01  0.000E+00   0.0E+00
    8   51  9.482E+01  0.000E+00  0.000E+00  0.000E+00  4.258E+01  1.284E+01  0.000E+00   0.0E+00
    8   53  9.346E+01  0.000E+00  0.000E+00  0.000E+00  0.000E+00  0.000E+00  8.523E+00   0.0E+00
    8   54  9.322E+01  1.273E+11  2.132E-01  4.581E-01  0.000E+00  0.000E+00  1.488E+03   9.8E-01
    8   55  9.316E+01  5.698E+09  5.296E-03  1.137E-02  0.000E+00  0.000E+00  2.713E+02   9.3E-01
    8   56  9.303E+01  1.906E+10  2.473E-02  5.301E-02  0.000E+00  0.000E+00  3.778E+00   1.0E+00
    8   57  9.275E+01  2.177E+09  2.006E-03  4.288E-03  0.000E+00  0.000E+00  5.498E+01   1.0E+00
    8   58  9.261E+01  2.091E+10  2.689E-02  5.738E-02  0.000E+00  0.000E+00  9.014E+02   1.0E+00
    8   59  9.160E+01  0.000E+00  0.000E+00  0.000E+00  0.000E+00  0.000E+00  2.207E+01   0.0E+00
    8   60  9.000E+01  0.000E+00  0.000E+00  0.000E+00  5.183E+07  0.000E+00  0.000E+00   0.0E+00
    8   61  9.000E+01  0.000E+00  0.000E+00  0.000E+00  4.661E+06  2.938E-01  0.000E+00   0.0E+00
    8   62  8.992E+01  7.379E+06  6.389E-06  1.324E-05  0.000E+00  0.000E+00  5.099E-01   1.2E+00
    8   63  8.978E+01  0.000E+00  0.000E+00  0.000E+00  3.070E+06  1.497E-01  0.000E+00   0.0E+00
    8   64  8.976E+01  0.000E+00  0.000E+00  0.000E+00  1.832E+07  1.746E-01  0.000E+00   0.0E+00
    8   65  8.984E+01  1.021E+08  8.822E-05  1.827E-04  0.000E+00  0.000E+00  2.154E+00   1.7E+00
    8   66  8.973E+01  1.455E+08  1.756E-04  3.632E-04  0.000E+00  0.000E+00  6.761E-01   1.3E+00
    8   67  8.961E+01  0.000E+00  0.000E+00  0.000E+00  1.097E+06  1.080E-02  0.000E+00   0.0E+00
    8   68  8.959E+01  0.000E+00  0.000E+00  0.000E+00  4.992E+06  2.593E-01  0.000E+00   0.0E+00
    8   69  8.950E+01  0.000E+00  0.000E+00  0.000E+00  2.101E+05  0.000E+00  0.000E+00   0.0E+00
    8   70  8.950E+01  0.000E+00  0.000E+00  0.000E+00  8.516E+05  4.640E-02  0.000E+00   0.0E+00
    8   71  8.856E+01  0.000E+00  0.000E+00  0.000E+00  0.000E+00  0.000E+00  3.204E+00   0.0E+00
    8   72  8.697E+01  0.000E+00  0.000E+00  0.000E+00  6.639E+03  3.859E-05  0.000E+00   0.0E+00
    8   73  8.694E+01  0.000E+00  0.000E+00  0.000E+00  4.239E+04  5.937E-02  0.000E+00   0.0E+00
    8   74  8.675E+01  0.000E+00  0.000E+00  0.000E+00  3.663E+01  1.850E-02  0.000E+00   0.0E+00
    8   75  8.674E+01  0.000E+00  0.000E+00  0.000E+00  1.630E+02  2.653E-01  0.000E+00   0.0E+00
    8   76  7.312E+01  2.192E+10  1.255E-02  2.115E-02  0.000E+00  0.000E+00  2.146E+02   1.1E+00
    8   77  7.303E+01  0.000E+00  0.000E+00  0.000E+00  0.000E+00  0.000E+00  4.680E+02   0.0E+00
    8   78  7.135E+01  0.000E+00  0.000E+00  0.000E+00  5.904E+06  0.000E+00  0.000E+00   0.0E+00
    8   79  7.120E+01  0.000E+00  0.000E+00  0.000E+00  1.673E+06  2.245E+02  0.000E+00   0.0E+00
    8   80  7.119E+01  0.000E+00  0.000E+00  0.000E+00  1.810E+06  9.540E+00  0.000E+00   0.0E+00
    8   81  7.111E+01  0.000E+00  0.000E+00  0.000E+00  3.204E+05  0.000E+00  0.000E+00   0.0E+00
    8   83  7.106E+01  0.000E+00  0.000E+00  0.000E+00  1.808E+06  1.247E+00  0.000E+00   0.0E+00
    8   84  7.111E+01  0.000E+00  0.000E+00  0.000E+00  0.000E+00  0.000E+00  2.604E-02   0.0E+00
    8   86  6.937E+01  0.000E+00  0.000E+00  0.000E+00  1.932E+02  0.000E+00  0.000E+00   0.0E+00
    8   87  6.930E+01  0.000E+00  0.000E+00  0.000E+00  1.364E+03  0.000E+00  0.000E+00   0.0E+00
    8   88  6.926E+01  0.000E+00  0.000E+00  0.000E+00  1.912E+03  5.029E-02  0.000E+00   0.0E+00
    8   90  6.909E+01  0.000E+00  0.000E+00  0.000E+00  0.000E+00  0.000E+00  1.017E+01   0.0E+00
    8   91  6.903E+01  7.549E+10  6.935E-02  1.103E-01  0.000E+00  0.000E+00  1.632E+03   9.8E-01
    8   92  6.901E+01  4.426E+09  2.257E-03  3.589E-03  0.000E+00  0.000E+00  3.171E+02   7.6E-01
    8   93  6.898E+01  1.139E+10  8.126E-03  1.292E-02  0.000E+00  0.000E+00  3.592E+00   1.0E+00
    8   94  6.891E+01  1.247E+09  6.343E-04  1.007E-03  0.000E+00  0.000E+00  6.358E+01   1.1E+00
    8   95  6.887E+01  1.244E+10  8.845E-03  1.404E-02  0.000E+00  0.000E+00  9.668E+02   1.1E+00
    8   97  6.853E+01  0.000E+00  0.000E+00  0.000E+00  0.000E+00  0.000E+00  4.444E+01   0.0E+00
    8   98  6.812E+01  0.000E+00  0.000E+00  0.000E+00  6.826E+04  0.000E+00  0.000E+00   0.0E+00
    8   99  6.812E+01  0.000E+00  0.000E+00  0.000E+00  1.051E+07  0.000E+00  0.000E+00   0.0E+00
    8  100  6.812E+01  0.000E+00  0.000E+00  0.000E+00  9.952E+05  2.002E-01  0.000E+00   0.0E+00
    8  101  6.811E+01  0.000E+00  0.000E+00  0.000E+00  3.775E+05  4.036E-01  0.000E+00   0.0E+00
    8  102  6.807E+01  0.000E+00  0.000E+00  0.000E+00  1.351E+06  1.120E-01  0.000E+00   0.0E+00
    8  103  6.806E+01  0.000E+00  0.000E+00  0.000E+00  1.626E+05  4.341E-02  0.000E+00   0.0E+00
    8  104  6.806E+01  1.158E+03  5.745E-10  9.011E-10  0.000E+00  0.000E+00  9.088E-03   9.8E+00
    8  105  6.806E+01  0.000E+00  0.000E+00  0.000E+00  4.854E+05  1.149E-01  0.000E+00   0.0E+00
    8  106  6.806E+01  4.523E+03  3.141E-09  4.926E-09  0.000E+00  0.000E+00  1.655E-02   2.4E+01
    8  107  6.805E+01  0.000E+00  0.000E+00  0.000E+00  3.513E+06  9.632E-02  0.000E+00   0.0E+00
    8  108  6.804E+01  0.000E+00  0.000E+00  0.000E+00  0.000E+00  0.000E+00  7.834E-06   0.0E+00
    8  110  6.802E+01  2.804E+04  1.945E-08  3.048E-08  0.000E+00  0.000E+00  2.001E-02   4.4E+00
    8  111  6.802E+01  2.872E+05  2.561E-07  4.015E-07  0.000E+00  0.000E+00  6.981E-02   6.1E+00
    8  112  6.800E+01  4.203E+02  3.747E-10  5.872E-10  0.000E+00  0.000E+00  5.313E-03   6.1E+00
    8  113  6.800E+01  0.000E+00  0.000E+00  0.000E+00  0.000E+00  0.000E+00  5.961E-02   0.0E+00
    8  114  6.725E+01  1.825E+06  8.838E-07  1.370E-06  0.000E+00  0.000E+00  3.243E-02   3.5E-01
    8  115  6.723E+01  1.282E+07  6.203E-06  9.611E-06  0.000E+00  0.000E+00  4.466E-01   2.6E+00
    8  116  6.719E+01  8.330E+06  5.639E-06  8.732E-06  0.000E+00  0.000E+00  4.580E-02   4.0E+00
    8  117  6.692E+01  0.000E+00  0.000E+00  0.000E+00  0.000E+00  0.000E+00  4.892E+00   0.0E+00
    8  118  6.639E+01  0.000E+00  0.000E+00  0.000E+00  1.039E+02  2.051E-04  0.000E+00   0.0E+00
    8  119  6.638E+01  0.000E+00  0.000E+00  0.000E+00  3.152E+02  2.923E-02  0.000E+00   0.0E+00
    8  120  6.637E+01  0.000E+00  0.000E+00  0.000E+00  9.019E+03  7.915E-02  0.000E+00   0.0E+00
    8  121  6.636E+01  0.000E+00  0.000E+00  0.000E+00  2.097E+03  1.355E-03  0.000E+00   0.0E+00
    8  122  6.632E+01  6.037E+04  3.981E-08  6.084E-08  0.000E+00  0.000E+00  1.767E-02   3.2E+00
    8  123  6.632E+01  1.268E+06  1.075E-06  1.643E-06  0.000E+00  0.000E+00  2.684E-01   3.2E+00
    8  124  6.632E+01  1.013E+04  8.588E-09  1.312E-08  0.000E+00  0.000E+00  7.747E-03   3.2E+00
    8  125  6.632E+01  0.000E+00  0.000E+00  0.000E+00  0.000E+00  0.000E+00  2.315E-02   0.0E+00
    9   10  1.350E+04  0.000E+00  0.000E+00  0.000E+00  1.943E-04  1.051E+00  0.000E+00   0.0E+00
    9   11  3.845E+03  0.000E+00  0.000E+00  0.000E+00  5.877E-03  7.955E+01  0.000E+00   0.0E+00
    9   12  3.740E+03  0.000E+00  0.000E+00  0.000E+00  0.000E+00  2.175E+02  0.000E+00   0.0E+00
    9   13  2.669E+03  0.000E+00  0.000E+00  0.000E+00  6.159E-02  1.987E+02  0.000E+00   0.0E+00
    9   14  2.680E+03  0.000E+00  0.000E+00  0.000E+00  8.701E-03  4.643E+01  0.000E+00   0.0E+00
    9   15  7.004E+02  0.000E+00  0.000E+00  0.000E+00  0.000E+00  5.343E+02  0.000E+00   0.0E+00
    9   16  4.398E+02  5.225E+08  5.051E-03  2.194E-02  0.000E+00  0.000E+00  0.000E+00   1.3E+00
    9   17  4.327E+02  1.037E+08  2.911E-03  1.244E-02  0.000E+00  0.000E+00  1.363E-01   1.1E+00
    9   18  4.190E+02  4.240E+08  1.860E-02  7.695E-02  0.000E+00  0.000E+00  5.572E-02   1.1E+00
    9   20  4.055E+02  0.000E+00  0.000E+00  0.000E+00  0.000E+00  0.000E+00  3.941E-03   0.0E+00
    9   21  3.919E+02  5.406E+09  2.074E-01  8.029E-01  0.000E+00  0.000E+00  1.080E-01   1.1E+00
    9   22  3.838E+02  0.000E+00  0.000E+00  0.000E+00  0.000E+00  0.000E+00  3.408E+00   0.0E+00
    9   23  3.585E+02  4.305E+09  8.297E-02  2.938E-01  0.000E+00  0.000E+00  3.819E-01   9.1E-01
    9   24  3.493E+02  2.048E+04  6.243E-07  2.154E-06  0.000E+00  0.000E+00  5.827E-02   1.4E+01
    9   25  3.444E+02  5.805E+07  1.721E-03  5.854E-03  0.000E+00  0.000E+00  1.826E-01   9.0E-01
    9   26  3.435E+02  0.000E+00  0.000E+00  0.000E+00  0.000E+00  0.000E+00  3.847E-02   0.0E+00
    9   27  2.979E+02  1.258E+09  1.674E-02  4.925E-02  0.000E+00  0.000E+00  4.994E-01   5.4E-01
    9   28  1.708E+02  0.000E+00  0.000E+00  0.000E+00  1.937E+03  1.368E+00  0.000E+00   0.0E+00
    9   29  1.605E+02  0.000E+00  0.000E+00  0.000E+00  0.000E+00  4.837E+00  0.000E+00   0.0E+00
    9   30  1.294E+02  4.664E+10  3.905E-02  4.992E-02  0.000E+00  0.000E+00  0.000E+00   5.3E-01
    9   31  1.292E+02  8.469E+08  2.118E-03  2.702E-03  0.000E+00  0.000E+00  9.481E+01   4.9E-01
    9   32  1.283E+02  7.680E+08  3.158E-03  4.001E-03  0.000E+00  0.000E+00  3.805E+01   5.8E-01
    9   33  1.262E+02  1.417E+10  3.382E-02  4.213E-02  0.000E+00  0.000E+00  2.531E-01   5.3E-01
    9   34  1.114E+02  2.879E+09  8.921E-03  9.812E-03  0.000E+00  0.000E+00  1.077E+02   9.6E-01
    9   35  1.110E+02  3.001E+10  5.544E-02  6.078E-02  0.000E+00  0.000E+00  2.785E+01   1.0E+00
    9   36  1.069E+02  1.203E+09  6.874E-04  7.259E-04  0.000E+00  0.000E+00  0.000E+00   1.7E+00
    9   37  1.067E+02  9.186E+08  1.568E-03  1.653E-03  0.000E+00  0.000E+00  3.215E-01   1.1E+00
    9   38  1.035E+02  0.000E+00  0.000E+00  0.000E+00  4.231E+05  1.669E+02  0.000E+00   0.0E+00
    9   39  1.031E+02  0.000E+00  0.000E+00  0.000E+00  2.150E+06  1.019E+01  0.000E+00   0.0E+00
    9   40  1.031E+02  0.000E+00  0.000E+00  0.000E+00  5.792E+05  0.000E+00  0.000E+00   0.0E+00
    9   41  1.025E+02  0.000E+00  0.000E+00  0.000E+00  2.390E+06  1.991E-01  0.000E+00   0.0E+00
    9   42  1.023E+02  0.000E+00  0.000E+00  0.000E+00  2.790E+06  2.262E+01  0.000E+00   0.0E+00
    9   43  1.005E+02  0.000E+00  0.000E+00  0.000E+00  0.000E+00  5.325E+01  0.000E+00   0.0E+00
    9   44  9.965E+01  0.000E+00  0.000E+00  0.000E+00  2.591E+04  8.044E-01  0.000E+00   0.0E+00
    9   45  9.916E+01  0.000E+00  0.000E+00  0.000E+00  4.439E+04  1.070E+01  0.000E+00   0.0E+00
    9   46  9.881E+01  0.000E+00  0.000E+00  0.000E+00  2.809E+05  1.470E+01  0.000E+00   0.0E+00
    9   47  9.792E+01  0.000E+00  0.000E+00  0.000E+00  8.937E+04  0.000E+00  0.000E+00   0.0E+00
    9   48  9.776E+01  0.000E+00  0.000E+00  0.000E+00  3.618E+05  1.526E+00  0.000E+00   0.0E+00
    9   49  9.776E+01  0.000E+00  0.000E+00  0.000E+00  2.195E+05  1.143E+00  0.000E+00   0.0E+00
    9   50  9.598E+01  0.000E+00  0.000E+00  0.000E+00  0.000E+00  7.075E-01  0.000E+00   0.0E+00
    9   51  9.565E+01  0.000E+00  0.000E+00  0.000E+00  6.662E+05  4.566E+00  0.000E+00   0.0E+00
    9   52  9.444E+01  1.415E+10  6.304E-03  5.880E-03  0.000E+00  0.000E+00  0.000E+00   9.2E-01
    9   53  9.426E+01  3.683E+09  4.906E-03  4.567E-03  0.000E+00  0.000E+00  5.422E+01   9.9E-01
    9   55  9.396E+01  7.510E+09  1.657E-02  1.537E-02  0.000E+00  0.000E+00  2.794E+01   9.9E-01
    9   56  9.383E+01  0.000E+00  0.000E+00  0.000E+00  0.000E+00  0.000E+00  2.397E+00   0.0E+00
    9   57  9.354E+01  7.742E+10  1.693E-01  1.564E-01  0.000E+00  0.000E+00  2.900E+01   9.8E-01
    9   58  9.340E+01  0.000E+00  0.000E+00  0.000E+00  0.000E+00  0.000E+00  7.240E+02   0.0E+00
    9   59  9.236E+01  4.370E+10  5.590E-02  5.099E-02  0.000E+00  0.000E+00  8.828E+01   1.1E+00
    9   62  9.066E+01  4.063E+09  8.344E-03  7.471E-03  0.000E+00  0.000E+00  3.042E+00   9.7E-01
    9   63  9.051E+01  0.000E+00  0.000E+00  0.000E+00  2.465E+07  0.000E+00  0.000E+00   0.0E+00
    9   65  9.058E+01  3.779E+07  7.748E-05  6.931E-05  0.000E+00  0.000E+00  1.350E+01   1.2E+00
    9   66  9.047E+01  0.000E+00  0.000E+00  0.000E+00  0.000E+00  0.000E+00  2.336E+01   0.0E+00
    9   67  9.035E+01  0.000E+00  0.000E+00  0.000E+00  1.794E+07  2.127E-01  0.000E+00   0.0E+00
    9   68  9.033E+01  0.000E+00  0.000E+00  0.000E+00  5.017E+06  0.000E+00  0.000E+00   0.0E+00
    9   69  9.024E+01  0.000E+00  0.000E+00  0.000E+00  4.476E+06  1.131E-01  0.000E+00   0.0E+00
    9   70  9.024E+01  0.000E+00  0.000E+00  0.000E+00  3.854E+06  7.602E-04  0.000E+00   0.0E+00
    9   71  8.928E+01  4.682E+07  5.595E-05  4.933E-05  0.000E+00  0.000E+00  3.545E+00   7.0E+00
    9   72  8.766E+01  0.000E+00  0.000E+00  0.000E+00  2.427E+06  0.000E+00  0.000E+00   0.0E+00
    9   74  8.744E+01  0.000E+00  0.000E+00  0.000E+00  1.142E+06  1.820E-01  0.000E+00   0.0E+00
    9   75  8.742E+01  0.000E+00  0.000E+00  0.000E+00  1.911E+04  0.000E+00  0.000E+00   0.0E+00
    9   76  7.361E+01  1.172E+09  1.587E-03  1.154E-03  0.000E+00  0.000E+00  9.269E+01   9.6E-01
    9   77  7.352E+01  1.335E+10  1.082E-02  7.853E-03  0.000E+00  0.000E+00  2.068E+01   1.1E+00
    9   78  7.182E+01  0.000E+00  0.000E+00  0.000E+00  3.151E+05  1.207E+02  0.000E+00   0.0E+00
    9   79  7.167E+01  0.000E+00  0.000E+00  0.000E+00  1.110E+06  6.262E+00  0.000E+00   0.0E+00
    9   80  7.165E+01  0.000E+00  0.000E+00  0.000E+00  2.866E+05  0.000E+00  0.000E+00   0.0E+00
    9   81  7.157E+01  0.000E+00  0.000E+00  0.000E+00  1.191E+06  2.979E-01  0.000E+00   0.0E+00
    9   82  7.162E+01  1.039E+09  2.663E-04  1.883E-04  0.000E+00  0.000E+00  0.000E+00   1.3E+00
    9   83  7.152E+01  0.000E+00  0.000E+00  0.000E+00  1.526E+06  1.383E+01  0.000E+00   0.0E+00
    9   84  7.157E+01  7.158E+08  5.497E-04  3.886E-04  0.000E+00  0.000E+00  3.299E-03   1.0E+00
    9   85  7.094E+01  0.000E+00  0.000E+00  0.000E+00  0.000E+00  5.696E+01  0.000E+00   0.0E+00
    9   86  6.981E+01  0.000E+00  0.000E+00  0.000E+00  7.555E+03  3.472E-01  0.000E+00   0.0E+00
    9   87  6.974E+01  0.000E+00  0.000E+00  0.000E+00  2.193E+05  6.339E+00  0.000E+00   0.0E+00
    9   88  6.970E+01  0.000E+00  0.000E+00  0.000E+00  1.285E+05  8.790E+00  0.000E+00   0.0E+00
    9   89  6.958E+01  9.806E+09  2.372E-03  1.630E-03  0.000E+00  0.000E+00  0.000E+00   7.9E-01
    9   90  6.952E+01  2.680E+09  1.942E-03  1.333E-03  0.000E+00  0.000E+00  5.916E+01   1.1E+00
    9   92  6.944E+01  4.166E+09  5.020E-03  3.443E-03  0.000E+00  0.000E+00  3.712E+01   1.0E+00
    9   93  6.942E+01  0.000E+00  0.000E+00  0.000E+00  0.000E+00  0.000E+00  3.455E+00   0.0E+00
    9   94  6.934E+01  4.601E+10  5.528E-02  3.786E-02  0.000E+00  0.000E+00  3.273E+01   9.8E-01
    9   95  6.931E+01  0.000E+00  0.000E+00  0.000E+00  0.000E+00  0.000E+00  8.050E+02   0.0E+00
    9   96  6.920E+01  0.000E+00  0.000E+00  0.000E+00  0.000E+00  1.331E-01  0.000E+00   0.0E+00
    9   97  6.896E+01  2.779E+10  1.981E-02  1.349E-02  0.000E+00  0.000E+00  1.128E+02   1.1E+00
    9   98  6.855E+01  0.000E+00  0.000E+00  0.000E+00  1.086E+06  1.077E-02  0.000E+00   0.0E+00
    9  101  6.854E+01  0.000E+00  0.000E+00  0.000E+00  3.575E+05  4.772E-02  0.000E+00   0.0E+00
    9  102  6.850E+01  0.000E+00  0.000E+00  0.000E+00  7.093E+05  0.000E+00  0.000E+00   0.0E+00
    9  103  6.849E+01  0.000E+00  0.000E+00  0.000E+00  4.130E+06  1.746E-02  0.000E+00   0.0E+00
    9  104  6.848E+01  6.580E+05  7.711E-07  5.215E-07  0.000E+00  0.000E+00  8.884E-02   3.4E+00
    9  105  6.848E+01  0.000E+00  0.000E+00  0.000E+00  5.303E+06  0.000E+00  0.000E+00   0.0E+00
    9  106  6.848E+01  0.000E+00  0.000E+00  0.000E+00  0.000E+00  0.000E+00  2.046E-02   0.0E+00
    9  110  6.844E+01  0.000E+00  0.000E+00  0.000E+00  0.000E+00  0.000E+00  1.101E-03   0.0E+00
    9  114  6.766E+01  3.535E+09  4.043E-03  2.702E-03  0.000E+00  0.000E+00  2.862E+00   9.9E-01
    9  115  6.765E+01  1.073E+07  1.227E-05  8.198E-06  0.000E+00  0.000E+00  1.052E+01   1.5E+00
    9  116  6.761E+01  0.000E+00  0.000E+00  0.000E+00  0.000E+00  0.000E+00  3.031E+01   0.0E+00
    9  117  6.733E+01  2.419E+08  1.644E-04  1.093E-04  0.000E+00  0.000E+00  3.318E-03   2.8E-01
    9  118  6.679E+01  0.000E+00  0.000E+00  0.000E+00  5.761E+05  0.000E+00  0.000E+00   0.0E+00
    9  120  6.678E+01  0.000E+00  0.000E+00  0.000E+00  2.617E+01  0.000E+00  0.000E+00   0.0E+00
    9  121  6.677E+01  0.000E+00  0.000E+00  0.000E+00  3.033E+05  1.574E-01  0.000E+00   0.0E+00
    9  122  6.672E+01  0.000E+00  0.000E+00  0.000E+00  0.000E+00  0.000E+00  2.126E-02   0.0E+00
   10   11  5.376E+03  0.000E+00  0.000E+00  0.000E+00  3.083E-03  1.824E+00  0.000E+00   0.0E+00
   10   12  5.174E+03  0.000E+00  0.000E+00  0.000E+00  1.170E-02  0.000E+00  0.000E+00   0.0E+00
   10   13  3.327E+03  0.000E+00  0.000E+00  0.000E+00  7.464E-03  2.538E+02  0.000E+00   0.0E+00
   10   14  3.344E+03  0.000E+00  0.000E+00  0.000E+00  3.119E-03  1.698E+02  0.000E+00   0.0E+00
   10   15  7.387E+02  0.000E+00  0.000E+00  0.000E+00  3.966E+02  0.000E+00  0.000E+00   0.0E+00
   10   16  4.546E+02  0.000E+00  0.000E+00  0.000E+00  0.000E+00  0.000E+00  2.385E-04   0.0E+00
   10   17  4.470E+02  7.530E+08  1.354E-02  9.960E-02  0.000E+00  0.000E+00  3.637E-01   1.2E+00
   10   18  4.324E+02  2.281E+09  6.394E-02  4.551E-01  0.000E+00  0.000E+00  2.071E+00   1.1E+00
   10   19  4.266E+02  0.000E+00  0.000E+00  0.000E+00  0.000E+00  0.000E+00  1.373E+00   0.0E+00
   10   20  4.180E+02  4.131E+07  1.515E-03  1.043E-02  0.000E+00  0.000E+00  7.097E-03   1.0E+00
   10   21  4.036E+02  3.701E+06  9.038E-05  6.005E-04  0.000E+00  0.000E+00  5.729E-01   1.5E+00
   10   22  3.950E+02  6.681E+09  2.188E-01  1.423E+00  0.000E+00  0.000E+00  1.426E+00   1.0E+00
   10   23  3.683E+02  3.076E+07  3.754E-04  2.276E-03  0.000E+00  0.000E+00  1.560E+00   5.0E-01
   10   24  3.586E+02  6.014E+06  1.159E-04  6.844E-04  0.000E+00  0.000E+00  1.162E-01   7.0E-01
   10   25  3.535E+02  8.144E+08  1.525E-02  8.874E-02  0.000E+00  0.000E+00  9.419E-01   9.2E-01
   10   26  3.524E+02  3.124E+07  8.143E-04  4.724E-03  0.000E+00  0.000E+00  2.187E-03   9.5E-01
   10   27  3.046E+02  3.669E+07  3.062E-04  1.536E-03  0.000E+00  0.000E+00  4.111E+00   3.1E+00
   10   28  1.729E+02  0.000E+00  0.000E+00  0.000E+00  3.274E+01  3.152E+01  0.000E+00   0.0E+00
   10   29  1.624E+02  0.000E+00  0.000E+00  0.000E+00  1.184E+04  0.000E+00  0.000E+00   0.0E+00
   10   30  1.307E+02  0.000E+00  0.000E+00  0.000E+00  0.000E+00  0.000E+00  1.552E+00   0.0E+00
   10   31  1.304E+02  4.251E+09  6.505E-03  1.396E-02  0.000E+00  0.000E+00  2.645E+01   5.5E-01
   10   32  1.295E+02  9.430E+09  2.371E-02  5.055E-02  0.000E+00  0.000E+00  1.560E+02   5.6E-01
   10   33  1.273E+02  2.222E+10  3.241E-02  6.793E-02  0.000E+00  0.000E+00  1.155E+02   5.5E-01
   10   34  1.123E+02  2.544E+10  4.810E-02  8.891E-02  0.000E+00  0.000E+00  1.728E+02   9.5E-01
   10   35  1.119E+02  3.019E+10  3.403E-02  6.269E-02  0.000E+00  0.000E+00  1.451E+02   1.0E+00
   10   36  1.078E+02  0.000E+00  0.000E+00  0.000E+00  0.000E+00  0.000E+00  2.636E+00   0.0E+00
   10   37  1.076E+02  1.899E+08  1.976E-04  3.499E-04  0.000E+00  0.000E+00  1.046E-01   1.9E+00
   10   38  1.043E+02  0.000E+00  0.000E+00  0.000E+00  2.171E+05  5.551E+01  0.000E+00   0.0E+00
   10   39  1.038E+02  0.000E+00  0.000E+00  0.000E+00  4.550E+06  8.944E+01  0.000E+00   0.0E+00
   10   40  1.038E+02  0.000E+00  0.000E+00  0.000E+00  3.055E+06  4.611E+00  0.000E+00   0.0E+00
   10   41  1.033E+02  0.000E+00  0.000E+00  0.000E+00  5.196E+06  9.766E+01  0.000E+00   0.0E+00
   10   42  1.031E+02  0.000E+00  0.000E+00  0.000E+00  8.625E+04  5.390E+00  0.000E+00   0.0E+00
   10   43  1.013E+02  0.000E+00  0.000E+00  0.000E+00  3.635E+06  0.000E+00  0.000E+00   0.0E+00
   10   44  1.004E+02  0.000E+00  0.000E+00  0.000E+00  3.484E+04  7.049E-01  0.000E+00   0.0E+00
   10   45  9.990E+01  0.000E+00  0.000E+00  0.000E+00  4.846E+02  7.732E+00  0.000E+00   0.0E+00
   10   46  9.954E+01  0.000E+00  0.000E+00  0.000E+00  1.825E+04  5.667E+00  0.000E+00   0.0E+00
   10   47  9.863E+01  0.000E+00  0.000E+00  0.000E+00  2.795E+05  5.402E-02  0.000E+00   0.0E+00
   10   48  9.847E+01  0.000E+00  0.000E+00  0.000E+00  1.774E+05  9.161E-01  0.000E+00   0.0E+00
   10   49  9.848E+01  0.000E+00  0.000E+00  0.000E+00  3.221E+05  2.440E+00  0.000E+00   0.0E+00
   10   50  9.667E+01  0.000E+00  0.000E+00  0.000E+00  1.955E+06  0.000E+00  0.000E+00   0.0E+00
   10   51  9.633E+01  0.000E+00  0.000E+00  0.000E+00  2.334E+05  1.124E-01  0.000E+00   0.0E+00
   10   52  9.510E+01  0.000E+00  0.000E+00  0.000E+00  0.000E+00  0.000E+00  8.000E-03   0.0E+00
   10   53  9.492E+01  1.867E+10  1.513E-02  2.364E-02  0.000E+00  0.000E+00  1.651E+02   9.6E-01
   10   54  9.468E+01  0.000E+00  0.000E+00  0.000E+00  0.000E+00  0.000E+00  5.446E+02   0.0E+00
   10   55  9.462E+01  5.322E+10  7.142E-02  1.112E-01  0.000E+00  0.000E+00  9.042E+02   9.8E-01
   10   56  9.448E+01  8.037E+08  1.506E-03  2.342E-03  0.000E+00  0.000E+00  2.767E+00   9.8E-01
   10   57  9.419E+01  1.778E+07  2.365E-05  3.667E-05  0.000E+00  0.000E+00  1.892E+02   6.8E-01
   10   58  9.405E+01  1.004E+11  1.863E-01  2.885E-01  0.000E+00  0.000E+00  3.661E+02   9.9E-01
   10   59  9.300E+01  4.963E+07  3.861E-05  5.911E-05  0.000E+00  0.000E+00  3.988E+02   2.0E-01
   10   61  9.135E+01  0.000E+00  0.000E+00  0.000E+00  6.196E+06  0.000E+00  0.000E+00   0.0E+00
   10   62  9.127E+01  6.851E+07  8.556E-05  1.285E-04  0.000E+00  0.000E+00  1.567E+00   1.2E+00
   10   63  9.112E+01  0.000E+00  0.000E+00  0.000E+00  8.935E+04  1.365E-01  0.000E+00   0.0E+00
   10   64  9.111E+01  0.000E+00  0.000E+00  0.000E+00  3.177E+07  0.000E+00  0.000E+00   0.0E+00
   10   65  9.119E+01  1.418E+09  1.767E-03  2.653E-03  0.000E+00  0.000E+00  2.634E+01   1.1E+00
   10   66  9.108E+01  1.439E+08  2.506E-04  3.757E-04  0.000E+00  0.000E+00  2.592E+00   9.4E-01
   10   67  9.096E+01  0.000E+00  0.000E+00  0.000E+00  2.651E+06  2.312E-01  0.000E+00   0.0E+00
   10   68  9.094E+01  0.000E+00  0.000E+00  0.000E+00  2.323E+07  5.301E-03  0.000E+00   0.0E+00
   10   69  9.085E+01  0.000E+00  0.000E+00  0.000E+00  3.976E+06  2.756E-04  0.000E+00   0.0E+00
   10   70  9.084E+01  0.000E+00  0.000E+00  0.000E+00  9.056E+06  2.013E-03  0.000E+00   0.0E+00
   10   71  8.987E+01  3.526E+08  2.562E-04  3.790E-04  0.000E+00  0.000E+00  5.144E+01   5.7E-01
   10   72  8.823E+01  0.000E+00  0.000E+00  0.000E+00  1.800E+04  5.746E-03  0.000E+00   0.0E+00
   10   73  8.821E+01  0.000E+00  0.000E+00  0.000E+00  1.932E+04  0.000E+00  0.000E+00   0.0E+00
   10   74  8.801E+01  0.000E+00  0.000E+00  0.000E+00  7.119E+03  7.719E-03  0.000E+00   0.0E+00
   10   75  8.799E+01  0.000E+00  0.000E+00  0.000E+00  2.118E+04  7.627E-02  0.000E+00   0.0E+00
   10   76  7.402E+01  1.009E+10  8.284E-03  1.009E-02  0.000E+00  0.000E+00  2.126E+02   9.7E-01
   10   77  7.392E+01  1.348E+10  6.625E-03  8.061E-03  0.000E+00  0.000E+00  1.518E+02   1.0E+00
   10   78  7.220E+01  0.000E+00  0.000E+00  0.000E+00  1.213E+05  3.843E+01  0.000E+00   0.0E+00
   10   79  7.205E+01  0.000E+00  0.000E+00  0.000E+00  2.438E+06  7.094E+01  0.000E+00   0.0E+00
   10   80  7.204E+01  0.000E+00  0.000E+00  0.000E+00  1.509E+06  4.654E+00  0.000E+00   0.0E+00
   10   81  7.195E+01  0.000E+00  0.000E+00  0.000E+00  2.620E+06  7.909E+01  0.000E+00   0.0E+00
   10   82  7.200E+01  0.000E+00  0.000E+00  0.000E+00  0.000E+00  0.000E+00  2.370E+00   0.0E+00
   10   83  7.190E+01  0.000E+00  0.000E+00  0.000E+00  1.711E+04  5.256E+00  0.000E+00   0.0E+00
   10   84  7.196E+01  1.439E+08  6.701E-05  7.937E-05  0.000E+00  0.000E+00  2.228E+00   1.4E+00
   10   85  7.131E+01  0.000E+00  0.000E+00  0.000E+00  3.378E+06  0.000E+00  0.000E+00   0.0E+00
   10   86  7.017E+01  0.000E+00  0.000E+00  0.000E+00  1.094E+04  5.481E-01  0.000E+00   0.0E+00
   10   87  7.010E+01  0.000E+00  0.000E+00  0.000E+00  5.789E+02  1.689E+00  0.000E+00   0.0E+00
   10   88  7.007E+01  0.000E+00  0.000E+00  0.000E+00  2.219E+04  6.405E-01  0.000E+00   0.0E+00
   10   89  6.994E+01  0.000E+00  0.000E+00  0.000E+00  0.000E+00  0.000E+00  3.630E-02   0.0E+00
   10   90  6.988E+01  1.139E+10  5.005E-03  5.758E-03  0.000E+00  0.000E+00  1.710E+02   9.2E-01
   10   91  6.983E+01  0.000E+00  0.000E+00  0.000E+00  0.000E+00  0.000E+00  5.922E+02   0.0E+00
   10   92  6.980E+01  3.251E+10  2.375E-02  2.728E-02  0.000E+00  0.000E+00  9.645E+02   9.8E-01
   10   93  6.978E+01  4.945E+08  5.053E-04  5.803E-04  0.000E+00  0.000E+00  2.769E+00   9.6E-01
   10   94  6.970E+01  5.101E+06  3.715E-06  4.263E-06  0.000E+00  0.000E+00  2.141E+02   1.9E-01
   10   95  6.967E+01  6.123E+10  6.237E-02  7.152E-02  0.000E+00  0.000E+00  4.120E+02   9.8E-01
   10   96  6.956E+01  0.000E+00  0.000E+00  0.000E+00  7.336E+05  0.000E+00  0.000E+00   0.0E+00
   10   97  6.931E+01  3.216E+08  1.389E-04  1.585E-04  0.000E+00  0.000E+00  5.828E+02   2.9E-01
   10   98  6.890E+01  0.000E+00  0.000E+00  0.000E+00  8.352E+05  2.587E-04  0.000E+00   0.0E+00
   10  100  6.889E+01  0.000E+00  0.000E+00  0.000E+00  1.128E+06  0.000E+00  0.000E+00   0.0E+00
   10  101  6.889E+01  0.000E+00  0.000E+00  0.000E+00  2.344E+06  1.006E-01  0.000E+00   0.0E+00
   10  102  6.885E+01  0.000E+00  0.000E+00  0.000E+00  4.645E+06  1.140E-02  0.000E+00   0.0E+00
   10  103  6.884E+01  0.000E+00  0.000E+00  0.000E+00  1.517E+05  1.283E-01  0.000E+00   0.0E+00
   10  104  6.883E+01  2.247E+03  1.596E-09  1.808E-09  0.000E+00  0.000E+00  5.118E-03   3.3E+00
   10  105  6.883E+01  0.000E+00  0.000E+00  0.000E+00  5.531E+01  1.003E-01  0.000E+00   0.0E+00
   10  106  6.883E+01  6.943E+05  6.903E-07  7.821E-07  0.000E+00  0.000E+00  3.558E-02   3.3E-01
   10  107  6.882E+01  0.000E+00  0.000E+00  0.000E+00  6.480E+06  0.000E+00  0.000E+00   0.0E+00
   10  110  6.879E+01  5.180E+05  5.145E-07  5.826E-07  0.000E+00  0.000E+00  9.554E-04   5.0E-01
   10  111  6.879E+01  0.000E+00  0.000E+00  0.000E+00  0.000E+00  0.000E+00  6.949E-04   0.0E+00
   10  112  6.878E+01  0.000E+00  0.000E+00  0.000E+00  0.000E+00  0.000E+00  6.069E-03   0.0E+00
   10  114  6.800E+01  3.553E+07  2.463E-05  2.757E-05  0.000E+00  0.000E+00  3.666E-01   1.4E+00
   10  115  6.799E+01  2.362E+08  1.637E-04  1.832E-04  0.000E+00  0.000E+00  1.140E+01   1.4E+00
   10  116  6.795E+01  1.624E+08  1.573E-04  1.760E-04  0.000E+00  0.000E+00  4.437E+00   9.4E-01
   10  117  6.767E+01  2.072E+08  8.533E-05  9.504E-05  0.000E+00  0.000E+00  1.985E+01   2.9E-01
   10  118  6.713E+01  0.000E+00  0.000E+00  0.000E+00  2.840E+03  2.670E-03  0.000E+00   0.0E+00
   10  119  6.712E+01  0.000E+00  0.000E+00  0.000E+00  1.101E+04  0.000E+00  0.000E+00   0.0E+00
   10  120  6.711E+01  0.000E+00  0.000E+00  0.000E+00  2.146E+04  2.703E-02  0.000E+00   0.0E+00
   10  121  6.710E+01  0.000E+00  0.000E+00  0.000E+00  1.485E+04  1.120E-03  0.000E+00   0.0E+00
   10  122  6.706E+01  3.306E+03  3.121E-09  3.444E-09  0.000E+00  0.000E+00  4.055E-03   8.4E+00
   10  123  6.705E+01  0.000E+00  0.000E+00  0.000E+00  0.000E+00  0.000E+00  1.952E-02   0.0E+00
   10  124  6.705E+01  0.000E+00  0.000E+00  0.000E+00  0.000E+00  0.000E+00  1.142E-03   0.0E+00
   11   12  1.378E+05  0.000E+00  0.000E+00  0.000E+00  0.000E+00  1.035E-03  0.000E+00   0.0E+00
   11   13  8.730E+03  0.000E+00  0.000E+00  0.000E+00  3.390E-03  5.510E-02  0.000E+00   0.0E+00
   11   14  8.847E+03  0.000E+00  0.000E+00  0.000E+00  1.456E-03  9.715E+00  0.000E+00   0.0E+00
   11   15  8.563E+02  0.000E+00  0.000E+00  0.000E+00  0.000E+00  7.248E+01  0.000E+00   0.0E+00
   11   16  4.967E+02  2.495E+07  3.076E-04  1.509E-03  0.000E+00  0.000E+00  0.000E+00   8.5E-01
   11   17  4.876E+02  1.576E+07  5.617E-04  2.705E-03  0.000E+00  0.000E+00  2.931E-03   1.9E+00
   11   18  4.702E+02  4.507E+07  2.490E-03  1.156E-02  0.000E+00  0.000E+00  1.400E-02   1.2E+00
   11   20  4.533E+02  0.000E+00  0.000E+00  0.000E+00  0.000E+00  0.000E+00  3.774E-02   0.0E+00
   11   21  4.364E+02  2.032E+07  9.668E-04  4.166E-03  0.000E+00  0.000E+00  1.087E-02   1.5E+00
   11   22  4.264E+02  0.000E+00  0.000E+00  0.000E+00  0.000E+00  0.000E+00  8.232E-02   0.0E+00
   11   23  3.954E+02  6.394E+07  1.499E-03  5.854E-03  0.000E+00  0.000E+00  6.706E-04   1.7E+00
   11   24  3.842E+02  7.577E+09  2.795E-01  1.061E+00  0.000E+00  0.000E+00  6.771E-02   1.0E+00
   11   25  3.783E+02  8.540E+05  3.054E-05  1.141E-04  0.000E+00  0.000E+00  1.117E-01   1.0E+00
   11   26  3.771E+02  0.000E+00  0.000E+00  0.000E+00  0.000E+00  0.000E+00  2.263E+00   0.0E+00
   11   27  3.229E+02  3.392E+09  5.303E-02  1.691E-01  0.000E+00  0.000E+00  8.075E-01   7.1E-01
   11   28  1.787E+02  0.000E+00  0.000E+00  0.000E+00  2.256E+03  3.301E+00  0.000E+00   0.0E+00
   11   29  1.675E+02  0.000E+00  0.000E+00  0.000E+00  0.000E+00  1.026E+00  0.000E+00   0.0E+00
   11   30  1.339E+02  1.946E+10  1.745E-02  2.308E-02  0.000E+00  0.000E+00  0.000E+00   4.8E-01
   11   31  1.337E+02  1.506E+10  4.033E-02  5.325E-02  0.000E+00  0.000E+00  5.492E+00   5.0E-01
   11   32  1.327E+02  1.056E+09  4.646E-03  6.089E-03  0.000E+00  0.000E+00  4.285E+00   5.3E-01
   11   33  1.304E+02  6.736E+09  1.718E-02  2.213E-02  0.000E+00  0.000E+00  1.264E+00   5.1E-01
   11   34  1.147E+02  9.040E+07  2.971E-04  3.365E-04  0.000E+00  0.000E+00  1.226E+01   6.7E-01
   11   35  1.143E+02  2.695E+09  5.279E-03  5.960E-03  0.000E+00  0.000E+00  2.645E+00   9.1E-01
   11   36  1.100E+02  4.797E+10  2.900E-02  3.150E-02  0.000E+00  0.000E+00  0.000E+00   1.1E+00
   11   37  1.098E+02  1.494E+10  2.698E-02  2.925E-02  0.000E+00  0.000E+00  1.091E+01   1.1E+00
   11   38  1.064E+02  0.000E+00  0.000E+00  0.000E+00  6.635E+04  2.665E+01  0.000E+00   0.0E+00
   11   39  1.059E+02  0.000E+00  0.000E+00  0.000E+00  1.444E+05  7.669E+00  0.000E+00   0.0E+00
   11   40  1.059E+02  0.000E+00  0.000E+00  0.000E+00  8.410E+03  0.000E+00  0.000E+00   0.0E+00
   11   41  1.053E+02  0.000E+00  0.000E+00  0.000E+00  2.748E+05  5.675E-01  0.000E+00   0.0E+00
   11   42  1.051E+02  0.000E+00  0.000E+00  0.000E+00  2.658E+05  9.707E-02  0.000E+00   0.0E+00
   11   43  1.032E+02  0.000E+00  0.000E+00  0.000E+00  0.000E+00  3.293E+00  0.000E+00   0.0E+00
   11   44  1.023E+02  0.000E+00  0.000E+00  0.000E+00  7.647E+05  3.380E+00  0.000E+00   0.0E+00
   11   45  1.018E+02  0.000E+00  0.000E+00  0.000E+00  1.952E+06  1.404E+02  0.000E+00   0.0E+00
   11   46  1.014E+02  0.000E+00  0.000E+00  0.000E+00  6.233E+06  5.825E+01  0.000E+00   0.0E+00
   11   47  1.005E+02  0.000E+00  0.000E+00  0.000E+00  2.968E+04  0.000E+00  0.000E+00   0.0E+00
   11   48  1.003E+02  0.000E+00  0.000E+00  0.000E+00  5.349E+05  1.312E+00  0.000E+00   0.0E+00
   11   49  1.003E+02  0.000E+00  0.000E+00  0.000E+00  8.944E+05  1.856E+01  0.000E+00   0.0E+00
   11   50  9.844E+01  0.000E+00  0.000E+00  0.000E+00  0.000E+00  1.010E+01  0.000E+00   0.0E+00
   11   51  9.809E+01  0.000E+00  0.000E+00  0.000E+00  1.200E+05  1.151E+01  0.000E+00   0.0E+00
   11   52  9.681E+01  2.030E+08  9.510E-05  9.093E-05  0.000E+00  0.000E+00  0.000E+00   1.3E+00
   11   53  9.663E+01  3.907E+08  5.469E-04  5.219E-04  0.000E+00  0.000E+00  3.514E+00   6.8E-01
   11   55  9.631E+01  1.522E+09  3.527E-03  3.355E-03  0.000E+00  0.000E+00  3.098E+00   9.4E-01
   11   56  9.617E+01  0.000E+00  0.000E+00  0.000E+00  0.000E+00  0.000E+00  4.273E+00   0.0E+00
   11   57  9.588E+01  1.753E+09  4.027E-03  3.813E-03  0.000E+00  0.000E+00  2.440E+00   1.0E+00
   11   58  9.573E+01  0.000E+00  0.000E+00  0.000E+00  0.000E+00  0.000E+00  5.372E+01   0.0E+00
   11   59  9.464E+01  2.117E+06  2.842E-06  2.657E-06  0.000E+00  0.000E+00  3.181E+00   1.3E+01
   11   62  9.285E+01  1.038E+11  2.235E-01  2.050E-01  0.000E+00  0.000E+00  2.136E+01   9.9E-01
   11   63  9.270E+01  0.000E+00  0.000E+00  0.000E+00  1.016E+06  0.000E+00  0.000E+00   0.0E+00
   11   65  9.276E+01  3.315E+08  7.127E-04  6.530E-04  0.000E+00  0.000E+00  2.705E+01   9.9E-01
   11   66  9.265E+01  0.000E+00  0.000E+00  0.000E+00  0.000E+00  0.000E+00  4.516E+02   0.0E+00
   11   67  9.252E+01  0.000E+00  0.000E+00  0.000E+00  8.275E+05  4.674E-02  0.000E+00   0.0E+00
   11   68  9.250E+01  0.000E+00  0.000E+00  0.000E+00  7.041E+05  0.000E+00  0.000E+00   0.0E+00
   11   69  9.241E+01  0.000E+00  0.000E+00  0.000E+00  4.900E+04  1.908E-02  0.000E+00   0.0E+00
   11   70  9.240E+01  0.000E+00  0.000E+00  0.000E+00  7.387E+05  2.230E-02  0.000E+00   0.0E+00
   11   71  9.140E+01  2.052E+10  2.571E-02  2.320E-02  0.000E+00  0.000E+00  5.889E+01   1.2E+00
   11   72  8.970E+01  0.000E+00  0.000E+00  0.000E+00  4.103E+07  0.000E+00  0.000E+00   0.0E+00
   11   74  8.948E+01  0.000E+00  0.000E+00  0.000E+00  1.074E+07  3.148E-01  0.000E+00   0.0E+00
   11   75  8.946E+01  0.000E+00  0.000E+00  0.000E+00  1.094E+05  0.000E+00  0.000E+00   0.0E+00
   11   76  7.505E+01  1.978E+07  2.784E-05  2.063E-05  0.000E+00  0.000E+00  1.117E+01   7.0E-01
   11   77  7.495E+01  1.132E+09  9.536E-04  7.059E-04  0.000E+00  0.000E+00  2.291E+00   1.0E+00
   11   78  7.318E+01  0.000E+00  0.000E+00  0.000E+00  2.975E+04  1.409E+01  0.000E+00   0.0E+00
   11   79  7.303E+01  0.000E+00  0.000E+00  0.000E+00  7.362E+04  2.016E+00  0.000E+00   0.0E+00
   11   80  7.301E+01  0.000E+00  0.000E+00  0.000E+00  2.014E+03  0.000E+00  0.000E+00   0.0E+00
   11   81  7.293E+01  0.000E+00  0.000E+00  0.000E+00  1.560E+05  4.317E-01  0.000E+00   0.0E+00
   11   82  7.298E+01  2.287E+10  6.088E-03  4.388E-03  0.000E+00  0.000E+00  0.000E+00   1.1E+00
   11   83  7.287E+01  0.000E+00  0.000E+00  0.000E+00  1.539E+05  1.691E-01  0.000E+00   0.0E+00
   11   84  7.293E+01  6.903E+09  5.505E-03  3.965E-03  0.000E+00  0.000E+00  1.148E+01   1.1E+00
   11   85  7.227E+01  0.000E+00  0.000E+00  0.000E+00  0.000E+00  8.536E-03  0.000E+00   0.0E+00
   11   86  7.110E+01  0.000E+00  0.000E+00  0.000E+00  1.297E+05  6.104E-02  0.000E+00   0.0E+00
   11   87  7.102E+01  0.000E+00  0.000E+00  0.000E+00  3.940E+06  4.526E+01  0.000E+00   0.0E+00
   11   88  7.099E+01  0.000E+00  0.000E+00  0.000E+00  1.442E+06  1.103E+02  0.000E+00   0.0E+00
   11   89  7.086E+01  1.681E+07  4.219E-06  2.953E-06  0.000E+00  0.000E+00  0.000E+00   1.0E+01
   11   90  7.080E+01  1.731E+08  1.301E-04  9.097E-05  0.000E+00  0.000E+00  4.101E+00   1.9E-01
   11   92  7.072E+01  9.610E+08  1.201E-03  8.388E-04  0.000E+00  0.000E+00  1.637E+00   8.6E-01
   11   93  7.069E+01  0.000E+00  0.000E+00  0.000E+00  0.000E+00  0.000E+00  1.199E+00   0.0E+00
   11   94  7.062E+01  2.260E+09  2.815E-03  1.964E-03  0.000E+00  0.000E+00  2.328E+00   1.0E+00
   11   95  7.058E+01  0.000E+00  0.000E+00  0.000E+00  0.000E+00  0.000E+00  6.749E+01   0.0E+00
   11   96  7.047E+01  0.000E+00  0.000E+00  0.000E+00  0.000E+00  1.566E+01  0.000E+00   0.0E+00
   11   97  7.021E+01  6.618E+08  4.891E-04  3.392E-04  0.000E+00  0.000E+00  1.480E+01   1.6E+00
   11   98  6.979E+01  0.000E+00  0.000E+00  0.000E+00  2.412E+01  8.540E-03  0.000E+00   0.0E+00
   11  101  6.978E+01  0.000E+00  0.000E+00  0.000E+00  3.532E+04  9.836E-03  0.000E+00   0.0E+00
   11  102  6.974E+01  0.000E+00  0.000E+00  0.000E+00  1.386E+05  0.000E+00  0.000E+00   0.0E+00
   11  103  6.973E+01  0.000E+00  0.000E+00  0.000E+00  3.352E+05  2.416E-02  0.000E+00   0.0E+00
   11  104  6.972E+01  5.594E+06  6.795E-06  4.679E-06  0.000E+00  0.000E+00  7.403E-02   1.8E+00
   11  105  6.972E+01  0.000E+00  0.000E+00  0.000E+00  2.985E+05  0.000E+00  0.000E+00   0.0E+00
   11  106  6.972E+01  0.000E+00  0.000E+00  0.000E+00  0.000E+00  0.000E+00  5.639E-02   0.0E+00
   11  110  6.968E+01  0.000E+00  0.000E+00  0.000E+00  0.000E+00  0.000E+00  1.572E-01   0.0E+00
   11  114  6.887E+01  6.078E+10  7.203E-02  4.900E-02  0.000E+00  0.000E+00  2.702E+01   9.9E-01
   11  115  6.886E+01  8.437E+08  9.995E-04  6.797E-04  0.000E+00  0.000E+00  2.891E+01   9.9E-01
   11  116  6.882E+01  0.000E+00  0.000E+00  0.000E+00  0.000E+00  0.000E+00  4.971E+02   0.0E+00
   11  117  6.853E+01  1.404E+10  9.886E-03  6.691E-03  0.000E+00  0.000E+00  6.265E+01   1.1E+00
   11  118  6.797E+01  0.000E+00  0.000E+00  0.000E+00  8.372E+06  0.000E+00  0.000E+00   0.0E+00
   11  120  6.796E+01  0.000E+00  0.000E+00  0.000E+00  4.010E+04  0.000E+00  0.000E+00   0.0E+00
   11  121  6.795E+01  0.000E+00  0.000E+00  0.000E+00  2.269E+06  3.021E-01  0.000E+00   0.0E+00
   11  122  6.790E+01  0.000E+00  0.000E+00  0.000E+00  0.000E+00  0.000E+00  2.631E-05   0.0E+00
   12   13  9.320E+03  0.000E+00  0.000E+00  0.000E+00  0.000E+00  1.449E+01  0.000E+00   0.0E+00
   12   14  9.454E+03  0.000E+00  0.000E+00  0.000E+00  4.479E-04  0.000E+00  0.000E+00   0.0E+00
   12   17  4.893E+02  2.436E+08  2.623E-02  4.226E-02  0.000E+00  0.000E+00  0.000E+00   1.3E+00
   12   18  4.718E+02  0.000E+00  0.000E+00  0.000E+00  0.000E+00  0.000E+00  1.521E-01   0.0E+00
   12   21  4.377E+02  0.000E+00  0.000E+00  0.000E+00  0.000E+00  0.000E+00  1.503E-01   0.0E+00
   12   23  3.966E+02  3.925E+09  2.776E-01  3.625E-01  0.000E+00  0.000E+00  0.000E+00   1.0E+00
   12   24  3.853E+02  0.000E+00  0.000E+00  0.000E+00  0.000E+00  0.000E+00  2.640E-02   0.0E+00
   12   25  3.794E+02  0.000E+00  0.000E+00  0.000E+00  0.000E+00  0.000E+00  1.129E+00   0.0E+00
   12   27  3.237E+02  2.725E+08  1.284E-02  1.368E-02  0.000E+00  0.000E+00  0.000E+00   1.1E+00
   12   28  1.789E+02  0.000E+00  0.000E+00  0.000E+00  0.000E+00  2.834E+01  0.000E+00   0.0E+00
   12   31  1.338E+02  6.039E+09  4.862E-02  2.141E-02  0.000E+00  0.000E+00  0.000E+00   5.4E-01
   12   32  1.328E+02  0.000E+00  0.000E+00  0.000E+00  0.000E+00  0.000E+00  2.688E+01   0.0E+00
   12   33  1.306E+02  1.219E+09  9.343E-03  4.016E-03  0.000E+00  0.000E+00  0.000E+00   6.7E-01
   12   34  1.148E+02  0.000E+00  0.000E+00  0.000E+00  0.000E+00  0.000E+00  2.307E+01   0.0E+00
   12   35  1.144E+02  8.379E+09  4.932E-02  1.858E-02  0.000E+00  0.000E+00  0.000E+00   9.3E-01
   12   37  1.098E+02  6.804E+09  3.693E-02  1.336E-02  0.000E+00  0.000E+00  0.000E+00   9.7E-01
   12   38  1.064E+02  0.000E+00  0.000E+00  0.000E+00  0.000E+00  2.655E+01  0.000E+00   0.0E+00
   12   39  1.060E+02  0.000E+00  0.000E+00  0.000E+00  9.129E+05  0.000E+00  0.000E+00   0.0E+00
   12   41  1.054E+02  0.000E+00  0.000E+00  0.000E+00  0.000E+00  5.104E+00  0.000E+00   0.0E+00
   12   42  1.052E+02  0.000E+00  0.000E+00  0.000E+00  4.021E+05  0.000E+00  0.000E+00   0.0E+00
   12   44  1.024E+02  0.000E+00  0.000E+00  0.000E+00  0.000E+00  1.873E-02  0.000E+00   0.0E+00
   12   45  1.019E+02  0.000E+00  0.000E+00  0.000E+00  1.489E+06  0.000E+00  0.000E+00   0.0E+00
   12   46  1.015E+02  0.000E+00  0.000E+00  0.000E+00  0.000E+00  3.553E+01  0.000E+00   0.0E+00
   12   48  1.004E+02  0.000E+00  0.000E+00  0.000E+00  0.000E+00  3.448E+00  0.000E+00   0.0E+00
   12   49  1.004E+02  0.000E+00  0.000E+00  0.000E+00  1.978E+04  0.000E+00  0.000E+00   0.0E+00
   12   51  9.816E+01  0.000E+00  0.000E+00  0.000E+00  9.084E+04  0.000E+00  0.000E+00   0.0E+00
   12   53  9.669E+01  3.256E+09  1.369E-02  4.358E-03  0.000E+00  0.000E+00  0.000E+00   9.3E-01
   12   55  9.638E+01  0.000E+00  0.000E+00  0.000E+00  0.000E+00  0.000E+00  1.692E+02   0.0E+00
   12   57  9.594E+01  0.000E+00  0.000E+00  0.000E+00  0.000E+00  0.000E+00  5.603E+01   0.0E+00
   12   59  9.470E+01  5.246E+10  2.116E-01  6.597E-02  0.000E+00  0.000E+00  0.000E+00   9.9E-01
   12   62  9.291E+01  0.000E+00  0.000E+00  0.000E+00  0.000E+00  0.000E+00  1.443E+01   0.0E+00
   12   65  9.283E+01  0.000E+00  0.000E+00  0.000E+00  0.000E+00  0.000E+00  1.578E+02   0.0E+00
   12   67  9.258E+01  0.000E+00  0.000E+00  0.000E+00  4.757E+06  0.000E+00  0.000E+00   0.0E+00
   12   69  9.247E+01  0.000E+00  0.000E+00  0.000E+00  0.000E+00  1.077E-01  0.000E+00   0.0E+00
   12   70  9.247E+01  0.000E+00  0.000E+00  0.000E+00  5.131E+06  0.000E+00  0.000E+00   0.0E+00
   12   71  9.146E+01  1.336E+10  5.026E-02  1.513E-02  0.000E+00  0.000E+00  0.000E+00   9.8E-01
   12   74  8.954E+01  0.000E+00  0.000E+00  0.000E+00  1.320E+07  0.000E+00  0.000E+00   0.0E+00
   12   76  7.509E+01  0.000E+00  0.000E+00  0.000E+00  0.000E+00  0.000E+00  2.973E+01   0.0E+00
   12   77  7.499E+01  3.372E+09  8.528E-03  2.105E-03  0.000E+00  0.000E+00  0.000E+00   9.0E-01
   12   78  7.322E+01  0.000E+00  0.000E+00  0.000E+00  0.000E+00  1.755E+01  0.000E+00   0.0E+00
   12   79  7.307E+01  0.000E+00  0.000E+00  0.000E+00  3.752E+05  0.000E+00  0.000E+00   0.0E+00
   12   81  7.297E+01  0.000E+00  0.000E+00  0.000E+00  0.000E+00  3.002E+00  0.000E+00   0.0E+00
   12   83  7.291E+01  0.000E+00  0.000E+00  0.000E+00  2.824E+05  0.000E+00  0.000E+00   0.0E+00
   12   84  7.297E+01  2.689E+09  6.440E-03  1.547E-03  0.000E+00  0.000E+00  0.000E+00   1.0E+00
   12   86  7.114E+01  0.000E+00  0.000E+00  0.000E+00  0.000E+00  1.878E-01  0.000E+00   0.0E+00
   12   87  7.106E+01  0.000E+00  0.000E+00  0.000E+00  0.000E+00  3.107E+01  0.000E+00   0.0E+00
   12   88  7.103E+01  0.000E+00  0.000E+00  0.000E+00  7.374E+05  0.000E+00  0.000E+00   0.0E+00
   12   90  7.084E+01  9.401E+08  2.122E-03  4.948E-04  0.000E+00  0.000E+00  0.000E+00   8.5E-01
   12   92  7.076E+01  0.000E+00  0.000E+00  0.000E+00  0.000E+00  0.000E+00  2.180E+02   0.0E+00
   12   94  7.065E+01  0.000E+00  0.000E+00  0.000E+00  0.000E+00  0.000E+00  5.968E+01   0.0E+00
   12   97  7.025E+01  2.657E+10  5.897E-02  1.364E-02  0.000E+00  0.000E+00  0.000E+00   9.8E-01
   12   98  6.983E+01  0.000E+00  0.000E+00  0.000E+00  0.000E+00  7.984E-03  0.000E+00   0.0E+00
   12  101  6.982E+01  0.000E+00  0.000E+00  0.000E+00  6.678E+05  0.000E+00  0.000E+00   0.0E+00
   12  103  6.976E+01  0.000E+00  0.000E+00  0.000E+00  1.219E+06  0.000E+00  0.000E+00   0.0E+00
   12  104  6.976E+01  0.000E+00  0.000E+00  0.000E+00  0.000E+00  0.000E+00  8.652E-03   0.0E+00
   12  114  6.891E+01  0.000E+00  0.000E+00  0.000E+00  0.000E+00  0.000E+00  1.436E+01   0.0E+00
   12  115  6.889E+01  0.000E+00  0.000E+00  0.000E+00  0.000E+00  0.000E+00  1.519E+02   0.0E+00
   12  117  6.856E+01  1.478E+10  3.125E-02  7.054E-03  0.000E+00  0.000E+00  0.000E+00   9.8E-01
   12  121  6.798E+01  0.000E+00  0.000E+00  0.000E+00  2.845E+06  0.000E+00  0.000E+00   0.0E+00
   13   14  6.576E+05  0.000E+00  0.000E+00  0.000E+00  1.013E-12  2.289E-05  0.000E+00   0.0E+00
   13   15  9.495E+02  0.000E+00  0.000E+00  0.000E+00  0.000E+00  6.412E+02  0.000E+00   0.0E+00
   13   16  5.266E+02  3.525E+08  4.886E-03  2.541E-02  0.000E+00  0.000E+00  0.000E+00   1.3E+00
   13   17  5.164E+02  1.134E+08  4.533E-03  2.312E-02  0.000E+00  0.000E+00  4.801E-02   1.2E+00
   13   18  4.970E+02  4.710E+07  2.907E-03  1.427E-02  0.000E+00  0.000E+00  1.089E-01   1.4E+00
   13   20  4.781E+02  0.000E+00  0.000E+00  0.000E+00  0.000E+00  0.000E+00  2.232E-02   0.0E+00
   13   21  4.593E+02  1.154E+07  6.081E-04  2.759E-03  0.000E+00  0.000E+00  3.334E-02   1.2E+00
   13   22  4.482E+02  0.000E+00  0.000E+00  0.000E+00  0.000E+00  0.000E+00  6.624E-02   0.0E+00
   13   23  4.142E+02  4.316E+08  1.110E-02  4.541E-02  0.000E+00  0.000E+00  2.110E-01   1.2E+00
   13   24  4.019E+02  9.955E+07  4.018E-03  1.595E-02  0.000E+00  0.000E+00  4.893E-02   1.1E+00
   13   25  3.955E+02  6.540E+09  2.555E-01  9.981E-01  0.000E+00  0.000E+00  4.780E+00   1.0E+00
   13   26  3.942E+02  0.000E+00  0.000E+00  0.000E+00  0.000E+00  0.000E+00  5.522E-01   0.0E+00
   13   27  3.353E+02  2.443E+09  4.119E-02  1.364E-01  0.000E+00  0.000E+00  7.858E-01   7.3E-01
   13   28  1.824E+02  0.000E+00  0.000E+00  0.000E+00  1.030E+02  3.547E+01  0.000E+00   0.0E+00
   13   29  1.708E+02  0.000E+00  0.000E+00  0.000E+00  0.000E+00  1.178E+01  0.000E+00   0.0E+00
   13   30  1.360E+02  3.548E+09  3.281E-03  4.407E-03  0.000E+00  0.000E+00  0.000E+00   5.9E-01
   13   31  1.357E+02  1.537E+09  4.245E-03  5.691E-03  0.000E+00  0.000E+00  1.096E+01   5.6E-01
   13   32  1.348E+02  6.665E+09  3.024E-02  4.025E-02  0.000E+00  0.000E+00  6.607E+00   5.3E-01
   13   33  1.324E+02  8.610E+09  2.263E-02  2.960E-02  0.000E+00  0.000E+00  1.014E+01   5.1E-01
   13   34  1.162E+02  3.214E+09  1.084E-02  1.245E-02  0.000E+00  0.000E+00  1.263E+01   8.5E-01
   13   35  1.158E+02  1.502E+08  3.020E-04  3.455E-04  0.000E+00  0.000E+00  6.202E+00   1.4E+00
   13   36  1.114E+02  5.712E+10  3.541E-02  3.895E-02  0.000E+00  0.000E+00  0.000E+00   1.0E+00
   13   37  1.112E+02  1.788E+10  3.312E-02  3.637E-02  0.000E+00  0.000E+00  2.690E+02   1.0E+00
   13   38  1.077E+02  0.000E+00  0.000E+00  0.000E+00  3.163E+03  2.342E+00  0.000E+00   0.0E+00
   13   39  1.072E+02  0.000E+00  0.000E+00  0.000E+00  1.145E+05  2.429E+00  0.000E+00   0.0E+00
   13   40  1.072E+02  0.000E+00  0.000E+00  0.000E+00  5.198E+05  0.000E+00  0.000E+00   0.0E+00
   13   41  1.066E+02  0.000E+00  0.000E+00  0.000E+00  2.106E+02  1.642E+01  0.000E+00   0.0E+00
   13   42  1.064E+02  0.000E+00  0.000E+00  0.000E+00  6.896E+02  7.949E+00  0.000E+00   0.0E+00
   13   43  1.044E+02  0.000E+00  0.000E+00  0.000E+00  0.000E+00  1.484E+02  0.000E+00   0.0E+00
   13   44  1.035E+02  0.000E+00  0.000E+00  0.000E+00  6.107E+06  2.784E+01  0.000E+00   0.0E+00
   13   45  1.030E+02  0.000E+00  0.000E+00  0.000E+00  2.205E+06  9.307E+00  0.000E+00   0.0E+00
   13   46  1.026E+02  0.000E+00  0.000E+00  0.000E+00  4.142E+05  7.330E+00  0.000E+00   0.0E+00
   13   47  1.017E+02  0.000E+00  0.000E+00  0.000E+00  2.584E+05  0.000E+00  0.000E+00   0.0E+00
   13   48  1.015E+02  0.000E+00  0.000E+00  0.000E+00  8.634E+05  1.363E+01  0.000E+00   0.0E+00
   13   49  1.015E+02  0.000E+00  0.000E+00  0.000E+00  4.420E+05  1.775E+00  0.000E+00   0.0E+00
   13   50  9.956E+01  0.000E+00  0.000E+00  0.000E+00  0.000E+00  9.580E+01  0.000E+00   0.0E+00
   13   51  9.920E+01  0.000E+00  0.000E+00  0.000E+00  4.753E+04  2.405E-01  0.000E+00   0.0E+00
   13   52  9.790E+01  1.297E+10  6.211E-03  6.006E-03  0.000E+00  0.000E+00  0.000E+00   9.5E-01
   13   53  9.771E+01  6.463E+09  9.250E-03  8.926E-03  0.000E+00  0.000E+00  3.402E+01   9.6E-01
   13   55  9.739E+01  6.104E+08  1.447E-03  1.391E-03  0.000E+00  0.000E+00  5.492E+00   1.1E+00
   13   56  9.725E+01  0.000E+00  0.000E+00  0.000E+00  0.000E+00  0.000E+00  6.751E+00   0.0E+00
   13   57  9.694E+01  6.054E+07  1.422E-04  1.361E-04  0.000E+00  0.000E+00  1.020E+01   9.4E-01
   13   58  9.679E+01  0.000E+00  0.000E+00  0.000E+00  0.000E+00  0.000E+00  1.947E+01   0.0E+00
   13   59  9.567E+01  2.325E+09  3.191E-03  3.015E-03  0.000E+00  0.000E+00  9.272E+01   7.6E-01
   13   62  9.385E+01  9.324E+08  2.052E-03  1.902E-03  0.000E+00  0.000E+00  9.512E+00   9.8E-01
   13   63  9.369E+01  0.000E+00  0.000E+00  0.000E+00  2.266E+03  0.000E+00  0.000E+00   0.0E+00
   13   65  9.376E+01  1.010E+11  2.219E-01  2.055E-01  0.000E+00  0.000E+00  1.352E+03   9.9E-01
   13   66  9.364E+01  0.000E+00  0.000E+00  0.000E+00  0.000E+00  0.000E+00  1.628E+02   0.0E+00
   13   67  9.351E+01  0.000E+00  0.000E+00  0.000E+00  6.374E+05  3.898E-02  0.000E+00   0.0E+00
   13   68  9.349E+01  0.000E+00  0.000E+00  0.000E+00  2.125E+06  0.000E+00  0.000E+00   0.0E+00
   13   69  9.340E+01  0.000E+00  0.000E+00  0.000E+00  3.628E+06  7.805E-04  0.000E+00   0.0E+00
   13   70  9.339E+01  0.000E+00  0.000E+00  0.000E+00  2.356E+06  3.786E-07  0.000E+00   0.0E+00
   13   71  9.237E+01  1.957E+10  2.504E-02  2.284E-02  0.000E+00  0.000E+00  1.941E+01   1.1E+00
   13   72  9.063E+01  0.000E+00  0.000E+00  0.000E+00  1.211E+06  0.000E+00  0.000E+00   0.0E+00
   13   74  9.040E+01  0.000E+00  0.000E+00  0.000E+00  9.961E+06  3.482E-01  0.000E+00   0.0E+00
   13   75  9.038E+01  0.000E+00  0.000E+00  0.000E+00  3.584E+07  0.000E+00  0.000E+00   0.0E+00
   13   76  7.570E+01  1.132E+09  1.621E-03  1.212E-03  0.000E+00  0.000E+00  1.235E+01   8.6E-01
   13   77  7.560E+01  1.644E+08  1.409E-04  1.052E-04  0.000E+00  0.000E+00  4.810E+00   1.3E+00
   13   78  7.380E+01  0.000E+00  0.000E+00  0.000E+00  9.045E+02  1.625E+00  0.000E+00   0.0E+00
   13   79  7.364E+01  0.000E+00  0.000E+00  0.000E+00  9.788E+04  1.618E+00  0.000E+00   0.0E+00
   13   80  7.363E+01  0.000E+00  0.000E+00  0.000E+00  2.157E+05  0.000E+00  0.000E+00   0.0E+00
   13   81  7.354E+01  0.000E+00  0.000E+00  0.000E+00  2.050E+04  8.693E+00  0.000E+00   0.0E+00
   13   82  7.360E+01  2.434E+10  6.589E-03  4.790E-03  0.000E+00  0.000E+00  0.000E+00   1.0E+00
   13   83  7.349E+01  0.000E+00  0.000E+00  0.000E+00  3.572E+02  5.605E+00  0.000E+00   0.0E+00
   13   84  7.355E+01  7.421E+09  6.018E-03  4.371E-03  0.000E+00  0.000E+00  2.688E+02   1.0E+00
   13   85  7.287E+01  0.000E+00  0.000E+00  0.000E+00  0.000E+00  3.905E+01  0.000E+00   0.0E+00
   13   86  7.168E+01  0.000E+00  0.000E+00  0.000E+00  3.125E+06  3.909E+01  0.000E+00   0.0E+00
   13   87  7.161E+01  0.000E+00  0.000E+00  0.000E+00  8.490E+05  2.657E+00  0.000E+00   0.0E+00
   13   88  7.157E+01  0.000E+00  0.000E+00  0.000E+00  1.391E+06  8.503E+00  0.000E+00   0.0E+00
   13   89  7.144E+01  7.632E+09  1.947E-03  1.373E-03  0.000E+00  0.000E+00  0.000E+00   9.5E-01
   13   90  7.138E+01  5.050E+09  3.858E-03  2.720E-03  0.000E+00  0.000E+00  3.474E+01   9.1E-01
   13   92  7.130E+01  1.654E+09  2.101E-03  1.479E-03  0.000E+00  0.000E+00  1.038E+00   1.0E+00
   13   93  7.127E+01  0.000E+00  0.000E+00  0.000E+00  0.000E+00  0.000E+00  4.357E+00   0.0E+00
   13   94  7.119E+01  1.835E+07  2.324E-05  1.634E-05  0.000E+00  0.000E+00  9.726E+00   8.9E-01
   13   95  7.115E+01  0.000E+00  0.000E+00  0.000E+00  0.000E+00  0.000E+00  1.910E+01   0.0E+00
   13   96  7.104E+01  0.000E+00  0.000E+00  0.000E+00  0.000E+00  1.547E+02  0.000E+00   0.0E+00
   13   97  7.078E+01  7.632E+07  5.733E-05  4.008E-05  0.000E+00  0.000E+00  1.373E+02   8.6E-02
   13   98  7.036E+01  0.000E+00  0.000E+00  0.000E+00  6.112E+05  4.946E-02  0.000E+00   0.0E+00
   13  101  7.034E+01  0.000E+00  0.000E+00  0.000E+00  5.000E+05  9.402E-03  0.000E+00   0.0E+00
   13  102  7.030E+01  0.000E+00  0.000E+00  0.000E+00  2.681E+05  0.000E+00  0.000E+00   0.0E+00
   13  103  7.029E+01  0.000E+00  0.000E+00  0.000E+00  2.898E+04  2.065E-03  0.000E+00   0.0E+00
   13  104  7.028E+01  1.963E+05  2.423E-07  1.682E-07  0.000E+00  0.000E+00  1.802E-05   1.9E+00
   13  105  7.028E+01  0.000E+00  0.000E+00  0.000E+00  1.882E+03  0.000E+00  0.000E+00   0.0E+00
   13  106  7.028E+01  0.000E+00  0.000E+00  0.000E+00  0.000E+00  0.000E+00  1.844E-03   0.0E+00
   13  110  7.024E+01  0.000E+00  0.000E+00  0.000E+00  0.000E+00  0.000E+00  8.137E-03   0.0E+00
   13  114  6.942E+01  1.235E+08  1.487E-04  1.020E-04  0.000E+00  0.000E+00  1.881E+00   1.0E+00
   13  115  6.940E+01  6.042E+10  7.272E-02  4.984E-02  0.000E+00  0.000E+00  1.503E+03   9.8E-01
   13  116  6.936E+01  0.000E+00  0.000E+00  0.000E+00  0.000E+00  0.000E+00  1.841E+02   0.0E+00
   13  117  6.907E+01  1.359E+10  9.717E-03  6.629E-03  0.000E+00  0.000E+00  9.571E+00   1.1E+00
   13  118  6.851E+01  0.000E+00  0.000E+00  0.000E+00  1.825E+05  0.000E+00  0.000E+00   0.0E+00
   13  120  6.849E+01  0.000E+00  0.000E+00  0.000E+00  7.553E+06  0.000E+00  0.000E+00   0.0E+00
   13  121  6.848E+01  0.000E+00  0.000E+00  0.000E+00  2.121E+06  2.630E-01  0.000E+00   0.0E+00
   13  122  6.843E+01  0.000E+00  0.000E+00  0.000E+00  0.000E+00  0.000E+00  1.718E-03   0.0E+00
   14   15  9.481E+02  0.000E+00  0.000E+00  0.000E+00  2.122E+02  0.000E+00  0.000E+00   0.0E+00
   14   16  5.262E+02  0.000E+00  0.000E+00  0.000E+00  0.000E+00  0.000E+00  5.050E-05   0.0E+00
   14   17  5.160E+02  6.753E+07  1.617E-03  1.374E-02  0.000E+00  0.000E+00  7.404E-03   1.0E+00
   14   18  4.966E+02  1.501E+08  5.551E-03  4.538E-02  0.000E+00  0.000E+00  1.705E-01   1.4E+00
   14   19  4.890E+02  0.000E+00  0.000E+00  0.000E+00  0.000E+00  0.000E+00  4.404E-03   0.0E+00
   14   20  4.778E+02  7.224E+06  3.461E-04  2.722E-03  0.000E+00  0.000E+00  6.550E-02   1.6E+00
   14   21  4.590E+02  9.714E+02  3.068E-08  2.318E-07  0.000E+00  0.000E+00  1.534E-03   2.9E+02
   14   22  4.479E+02  4.489E+07  1.890E-03  1.394E-02  0.000E+00  0.000E+00  6.802E-03   1.2E+00
   14   23  4.139E+02  4.952E+07  7.633E-04  5.201E-03  0.000E+00  0.000E+00  4.303E-03   6.0E-01
   14   24  4.017E+02  9.127E+08  2.207E-02  1.459E-01  0.000E+00  0.000E+00  4.950E-02   1.0E+00
   14   25  3.952E+02  7.949E+08  1.861E-02  1.211E-01  0.000E+00  0.000E+00  1.703E+00   1.0E+00
   14   26  3.940E+02  8.100E+09  2.638E-01  1.711E+00  0.000E+00  0.000E+00  6.419E+00   1.0E+00
   14   27  3.351E+02  9.169E+07  9.264E-04  5.111E-03  0.000E+00  0.000E+00  3.346E-02   2.3E+00
   14   28  1.824E+02  0.000E+00  0.000E+00  0.000E+00  2.018E+03  1.200E+01  0.000E+00   0.0E+00
   14   29  1.707E+02  0.000E+00  0.000E+00  0.000E+00  1.114E+04  0.000E+00  0.000E+00   0.0E+00
   14   30  1.360E+02  0.000E+00  0.000E+00  0.000E+00  0.000E+00  0.000E+00  3.176E+01   0.0E+00
   14   31  1.357E+02  1.575E+09  2.610E-03  5.830E-03  0.000E+00  0.000E+00  6.878E+00   4.2E-01
   14   32  1.347E+02  1.285E+10  3.497E-02  7.756E-02  0.000E+00  0.000E+00  4.874E-02   5.2E-01
   14   33  1.324E+02  2.191E+10  3.455E-02  7.528E-02  0.000E+00  0.000E+00  1.230E+00   5.2E-01
   14   34  1.162E+02  1.988E+09  4.024E-03  7.697E-03  0.000E+00  0.000E+00  1.486E-01   7.5E-01
   14   35  1.158E+02  4.244E+07  5.119E-05  9.758E-05  0.000E+00  0.000E+00  2.756E-01   1.2E+00
   14   36  1.114E+02  0.000E+00  0.000E+00  0.000E+00  0.000E+00  0.000E+00  6.343E+02   0.0E+00
   14   37  1.112E+02  5.916E+10  6.573E-02  1.203E-01  0.000E+00  0.000E+00  3.217E+02   1.1E+00
   14   38  1.077E+02  0.000E+00  0.000E+00  0.000E+00  1.420E+04  2.693E-01  0.000E+00   0.0E+00
   14   39  1.072E+02  0.000E+00  0.000E+00  0.000E+00  6.710E+04  2.322E-01  0.000E+00   0.0E+00
   14   40  1.072E+02  0.000E+00  0.000E+00  0.000E+00  1.477E+05  3.244E-01  0.000E+00   0.0E+00
   14   41  1.066E+02  0.000E+00  0.000E+00  0.000E+00  5.278E+03  2.863E+00  0.000E+00   0.0E+00
   14   42  1.063E+02  0.000E+00  0.000E+00  0.000E+00  1.737E+05  3.310E+00  0.000E+00   0.0E+00
   14   43  1.044E+02  0.000E+00  0.000E+00  0.000E+00  2.767E+06  0.000E+00  0.000E+00   0.0E+00
   14   44  1.035E+02  0.000E+00  0.000E+00  0.000E+00  3.356E+06  2.231E+02  0.000E+00   0.0E+00
   14   45  1.030E+02  0.000E+00  0.000E+00  0.000E+00  3.533E+06  7.910E+00  0.000E+00   0.0E+00
   14   46  1.026E+02  0.000E+00  0.000E+00  0.000E+00  5.667E+06  1.109E+01  0.000E+00   0.0E+00
   14   47  1.016E+02  0.000E+00  0.000E+00  0.000E+00  1.804E+05  6.009E+00  0.000E+00   0.0E+00
   14   48  1.015E+02  0.000E+00  0.000E+00  0.000E+00  4.804E+05  6.304E+01  0.000E+00   0.0E+00
   14   49  1.015E+02  0.000E+00  0.000E+00  0.000E+00  5.583E+05  2.125E+00  0.000E+00   0.0E+00
   14   50  9.955E+01  0.000E+00  0.000E+00  0.000E+00  9.529E+06  0.000E+00  0.000E+00   0.0E+00
   14   51  9.919E+01  0.000E+00  0.000E+00  0.000E+00  3.024E+05  6.915E-02  0.000E+00   0.0E+00
   14   52  9.789E+01  0.000E+00  0.000E+00  0.000E+00  0.000E+00  0.000E+00  6.049E-01   0.0E+00
   14   53  9.769E+01  1.255E+09  1.077E-03  1.733E-03  0.000E+00  0.000E+00  3.555E+00   1.0E+00
   14   54  9.743E+01  0.000E+00  0.000E+00  0.000E+00  0.000E+00  0.000E+00  4.830E+00   0.0E+00
   14   55  9.737E+01  2.495E+09  3.546E-03  5.684E-03  0.000E+00  0.000E+00  5.783E+01   8.7E-01
   14   56  9.723E+01  4.310E+08  8.552E-04  1.369E-03  0.000E+00  0.000E+00  7.219E+00   1.1E+00
   14   57  9.693E+01  4.623E+08  6.511E-04  1.039E-03  0.000E+00  0.000E+00  1.307E-02   1.0E+00
   14   58  9.677E+01  8.834E+06  1.737E-05  2.766E-05  0.000E+00  0.000E+00  2.411E+00   5.2E-01
   14   59  9.566E+01  2.106E+08  1.733E-04  2.729E-04  0.000E+00  0.000E+00  8.074E-01   1.7E+00
   14   61  9.392E+01  0.000E+00  0.000E+00  0.000E+00  6.470E+05  0.000E+00  0.000E+00   0.0E+00
   14   62  9.383E+01  1.554E+10  2.051E-02  3.168E-02  0.000E+00  0.000E+00  7.895E+00   9.9E-01
   14   63  9.368E+01  0.000E+00  0.000E+00  0.000E+00  3.740E+05  1.138E-03  0.000E+00   0.0E+00
   14   64  9.366E+01  0.000E+00  0.000E+00  0.000E+00  9.792E+03  0.000E+00  0.000E+00   0.0E+00
   14   65  9.375E+01  1.401E+10  1.846E-02  2.849E-02  0.000E+00  0.000E+00  5.500E+02   9.9E-01
   14   66  9.363E+01  1.234E+11  2.271E-01  3.499E-01  0.000E+00  0.000E+00  1.684E+03   9.9E-01
   14   67  9.350E+01  0.000E+00  0.000E+00  0.000E+00  2.581E+05  1.408E-02  0.000E+00   0.0E+00
   14   68  9.348E+01  0.000E+00  0.000E+00  0.000E+00  1.065E+05  2.369E-02  0.000E+00   0.0E+00
   14   69  9.338E+01  0.000E+00  0.000E+00  0.000E+00  1.640E+05  1.299E-02  0.000E+00   0.0E+00
   14   70  9.338E+01  0.000E+00  0.000E+00  0.000E+00  1.130E+05  2.967E-04  0.000E+00   0.0E+00
   14   71  9.236E+01  2.421E+09  1.857E-03  2.824E-03  0.000E+00  0.000E+00  7.105E-02   8.0E-01
   14   72  9.062E+01  0.000E+00  0.000E+00  0.000E+00  7.376E+06  3.025E-01  0.000E+00   0.0E+00
   14   73  9.060E+01  0.000E+00  0.000E+00  0.000E+00  4.969E+07  0.000E+00  0.000E+00   0.0E+00
   14   74  9.039E+01  0.000E+00  0.000E+00  0.000E+00  3.229E+06  8.075E-06  0.000E+00   0.0E+00
   14   75  9.037E+01  0.000E+00  0.000E+00  0.000E+00  9.120E+06  2.349E-01  0.000E+00   0.0E+00
   14   76  7.569E+01  5.456E+08  4.686E-04  5.839E-04  0.000E+00  0.000E+00  2.072E-01   7.9E-01
   14   77  7.559E+01  1.005E+08  5.167E-05  6.429E-05  0.000E+00  0.000E+00  3.647E-02   9.7E-01
   14   78  7.379E+01  0.000E+00  0.000E+00  0.000E+00  3.118E+03  4.243E-02  0.000E+00   0.0E+00
   14   79  7.364E+01  0.000E+00  0.000E+00  0.000E+00  1.191E+04  2.234E-01  0.000E+00   0.0E+00
   14   80  7.362E+01  0.000E+00  0.000E+00  0.000E+00  4.851E+04  9.809E-01  0.000E+00   0.0E+00
   14   81  7.353E+01  0.000E+00  0.000E+00  0.000E+00  1.238E+02  1.376E-01  0.000E+00   0.0E+00
   14   82  7.359E+01  0.000E+00  0.000E+00  0.000E+00  0.000E+00  0.000E+00  6.522E+02   0.0E+00
   14   83  7.348E+01  0.000E+00  0.000E+00  0.000E+00  1.207E+05  2.184E+00  0.000E+00   0.0E+00
   14   84  7.354E+01  2.757E+10  1.341E-02  1.624E-02  0.000E+00  0.000E+00  3.256E+02   1.0E+00
   14   85  7.286E+01  0.000E+00  0.000E+00  0.000E+00  7.897E+04  0.000E+00  0.000E+00   0.0E+00
   14   86  7.168E+01  0.000E+00  0.000E+00  0.000E+00  3.282E+06  2.221E+02  0.000E+00   0.0E+00
   14   87  7.160E+01  0.000E+00  0.000E+00  0.000E+00  1.781E+06  1.185E+00  0.000E+00   0.0E+00
   14   88  7.156E+01  0.000E+00  0.000E+00  0.000E+00  2.375E+06  1.087E+01  0.000E+00   0.0E+00
   14   89  7.143E+01  0.000E+00  0.000E+00  0.000E+00  0.000E+00  0.000E+00  1.194E+00   0.0E+00
   14   90  7.138E+01  4.331E+08  1.984E-04  2.331E-04  0.000E+00  0.000E+00  1.667E+00   1.5E+00
   14   91  7.132E+01  0.000E+00  0.000E+00  0.000E+00  0.000E+00  0.000E+00  5.367E+00   0.0E+00
   14   92  7.129E+01  1.066E+09  8.120E-04  9.529E-04  0.000E+00  0.000E+00  4.033E+01   6.6E-01
   14   93  7.126E+01  8.482E+08  9.040E-04  1.061E-03  0.000E+00  0.000E+00  7.265E-01   1.0E+00
   14   94  7.118E+01  4.762E+08  3.617E-04  4.239E-04  0.000E+00  0.000E+00  2.345E-01   1.0E+00
   14   95  7.115E+01  8.969E+06  9.529E-06  1.116E-05  0.000E+00  0.000E+00  5.356E+00   2.0E+00
   14   96  7.103E+01  0.000E+00  0.000E+00  0.000E+00  7.411E+06  0.000E+00  0.000E+00   0.0E+00
   14   97  7.078E+01  5.536E+05  2.494E-07  2.906E-07  0.000E+00  0.000E+00  3.997E-01   1.7E+02
   14   98  7.035E+01  0.000E+00  0.000E+00  0.000E+00  6.726E+03  4.388E-02  0.000E+00   0.0E+00
   14  100  7.034E+01  0.000E+00  0.000E+00  0.000E+00  1.256E+05  0.000E+00  0.000E+00   0.0E+00
   14  101  7.033E+01  0.000E+00  0.000E+00  0.000E+00  1.018E+04  8.859E-03  0.000E+00   0.0E+00
   14  102  7.029E+01  0.000E+00  0.000E+00  0.000E+00  8.511E+04  2.502E-02  0.000E+00   0.0E+00
   14  103  7.028E+01  0.000E+00  0.000E+00  0.000E+00  7.951E+04  3.980E-06  0.000E+00   0.0E+00
   14  104  7.028E+01  6.754E+05  5.001E-07  5.785E-07  0.000E+00  0.000E+00  1.175E-02   1.7E+00
   14  105  7.028E+01  0.000E+00  0.000E+00  0.000E+00  7.799E+04  1.878E-04  0.000E+00   0.0E+00
   14  106  7.027E+01  9.936E+06  1.030E-05  1.191E-05  0.000E+00  0.000E+00  5.915E-01   1.6E+00
   14  107  7.027E+01  0.000E+00  0.000E+00  0.000E+00  1.435E+04  0.000E+00  0.000E+00   0.0E+00
   14  110  7.024E+01  4.279E+05  4.431E-07  5.122E-07  0.000E+00  0.000E+00  8.452E-02   9.6E-01
   14  111  7.024E+01  0.000E+00  0.000E+00  0.000E+00  0.000E+00  0.000E+00  7.858E-02   0.0E+00
   14  112  7.022E+01  0.000E+00  0.000E+00  0.000E+00  0.000E+00  0.000E+00  2.909E-04   0.0E+00
   14  114  6.941E+01  1.007E+10  7.276E-03  8.314E-03  0.000E+00  0.000E+00  2.613E+00   9.8E-01
   14  115  6.940E+01  8.114E+09  5.858E-03  6.692E-03  0.000E+00  0.000E+00  6.307E+02   9.8E-01
   14  116  6.936E+01  7.394E+10  7.465E-02  8.523E-02  0.000E+00  0.000E+00  1.863E+03   9.9E-01
   14  117  6.906E+01  2.029E+09  8.704E-04  9.895E-04  0.000E+00  0.000E+00  5.919E-03   7.5E-01
   14  118  6.850E+01  0.000E+00  0.000E+00  0.000E+00  1.533E+06  1.939E-01  0.000E+00   0.0E+00
   14  119  6.849E+01  0.000E+00  0.000E+00  0.000E+00  9.929E+06  0.000E+00  0.000E+00   0.0E+00
   14  120  6.848E+01  0.000E+00  0.000E+00  0.000E+00  1.772E+06  1.884E-01  0.000E+00   0.0E+00
   14  121  6.847E+01  0.000E+00  0.000E+00  0.000E+00  6.502E+05  5.530E-04  0.000E+00   0.0E+00
   14  122  6.843E+01  8.710E+05  8.560E-07  9.642E-07  0.000E+00  0.000E+00  6.424E-03   1.1E+00
   14  123  6.843E+01  0.000E+00  0.000E+00  0.000E+00  0.000E+00  0.000E+00  1.601E-04   0.0E+00
   14  124  6.842E+01  0.000E+00  0.000E+00  0.000E+00  0.000E+00  0.000E+00  5.008E-09   0.0E+00
   15   17  1.132E+03  1.940E+04  1.119E-05  4.171E-05  0.000E+00  0.000E+00  0.000E+00   1.6E+00
   15   18  1.043E+03  0.000E+00  0.000E+00  0.000E+00  0.000E+00  0.000E+00  9.509E-03   0.0E+00
   15   21  8.897E+02  0.000E+00  0.000E+00  0.000E+00  0.000E+00  0.000E+00  2.128E-03   0.0E+00
   15   23  7.347E+02  2.171E+07  5.269E-03  1.274E-02  0.000E+00  0.000E+00  0.000E+00   5.9E-01
   15   24  6.969E+02  0.000E+00  0.000E+00  0.000E+00  0.000E+00  0.000E+00  1.057E-02   0.0E+00
   15   25  6.777E+02  0.000E+00  0.000E+00  0.000E+00  0.000E+00  0.000E+00  1.438E-03   0.0E+00
   15   27  5.184E+02  1.823E+09  2.204E-01  3.761E-01  0.000E+00  0.000E+00  0.000E+00   8.4E-01
   15   28  2.258E+02  0.000E+00  0.000E+00  0.000E+00  0.000E+00  6.620E-01  0.000E+00   0.0E+00
   15   31  1.584E+02  1.012E+09  1.142E-02  5.952E-03  0.000E+00  0.000E+00  0.000E+00   6.8E-01
   15   32  1.570E+02  0.000E+00  0.000E+00  0.000E+00  0.000E+00  0.000E+00  2.601E+01   0.0E+00
   15   33  1.539E+02  1.354E+10  1.442E-01  7.303E-02  0.000E+00  0.000E+00  0.000E+00   7.5E-01
   15   34  1.324E+02  0.000E+00  0.000E+00  0.000E+00  0.000E+00  0.000E+00  2.745E+01   0.0E+00
   15   35  1.319E+02  8.937E+09  6.995E-02  3.038E-02  0.000E+00  0.000E+00  0.000E+00   8.1E-01
   15   37  1.259E+02  9.468E+09  6.751E-02  2.798E-02  0.000E+00  0.000E+00  0.000E+00   8.4E-01
   15   38  1.215E+02  0.000E+00  0.000E+00  0.000E+00  0.000E+00  4.492E+01  0.000E+00   0.0E+00
   15   39  1.208E+02  0.000E+00  0.000E+00  0.000E+00  5.302E+05  0.000E+00  0.000E+00   0.0E+00
   15   41  1.201E+02  0.000E+00  0.000E+00  0.000E+00  0.000E+00  1.909E+01  0.000E+00   0.0E+00
   15   42  1.198E+02  0.000E+00  0.000E+00  0.000E+00  5.072E+05  0.000E+00  0.000E+00   0.0E+00
   15   44  1.162E+02  0.000E+00  0.000E+00  0.000E+00  0.000E+00  4.042E+00  0.000E+00   0.0E+00
   15   45  1.155E+02  0.000E+00  0.000E+00  0.000E+00  8.160E+05  0.000E+00  0.000E+00   0.0E+00
   15   46  1.150E+02  0.000E+00  0.000E+00  0.000E+00  0.000E+00  1.230E+02  0.000E+00   0.0E+00
   15   48  1.136E+02  0.000E+00  0.000E+00  0.000E+00  0.000E+00  2.511E+00  0.000E+00   0.0E+00
   15   49  1.136E+02  0.000E+00  0.000E+00  0.000E+00  1.492E+05  0.000E+00  0.000E+00   0.0E+00
   15   51  1.108E+02  0.000E+00  0.000E+00  0.000E+00  1.033E+06  0.000E+00  0.000E+00   0.0E+00
   15   53  1.089E+02  1.104E+08  5.891E-04  2.112E-04  0.000E+00  0.000E+00  0.000E+00   1.1E+00
   15   55  1.085E+02  0.000E+00  0.000E+00  0.000E+00  0.000E+00  0.000E+00  3.013E+02   0.0E+00
   15   57  1.080E+02  0.000E+00  0.000E+00  0.000E+00  0.000E+00  0.000E+00  5.094E+01   0.0E+00
   15   59  1.064E+02  1.367E+10  6.961E-02  2.438E-02  0.000E+00  0.000E+00  0.000E+00   1.0E+00
   15   62  1.041E+02  0.000E+00  0.000E+00  0.000E+00  0.000E+00  0.000E+00  2.536E+01   0.0E+00
   15   65  1.040E+02  0.000E+00  0.000E+00  0.000E+00  0.000E+00  0.000E+00  4.898E+01   0.0E+00
   15   67  1.037E+02  0.000E+00  0.000E+00  0.000E+00  3.600E+06  0.000E+00  0.000E+00   0.0E+00
   15   69  1.036E+02  0.000E+00  0.000E+00  0.000E+00  0.000E+00  4.428E-02  0.000E+00   0.0E+00
   15   70  1.036E+02  0.000E+00  0.000E+00  0.000E+00  4.584E+06  0.000E+00  0.000E+00   0.0E+00
   15   71  1.023E+02  5.537E+10  2.607E-01  8.784E-02  0.000E+00  0.000E+00  0.000E+00   1.0E+00
   15   74  9.992E+01  0.000E+00  0.000E+00  0.000E+00  8.083E+06  0.000E+00  0.000E+00   0.0E+00
   15   76  8.226E+01  0.000E+00  0.000E+00  0.000E+00  0.000E+00  0.000E+00  4.086E+01   0.0E+00
   15   77  8.214E+01  4.647E+09  1.410E-02  3.813E-03  0.000E+00  0.000E+00  0.000E+00   5.9E-01
   15   78  8.002E+01  0.000E+00  0.000E+00  0.000E+00  0.000E+00  3.090E+01  0.000E+00   0.0E+00
   15   79  7.983E+01  0.000E+00  0.000E+00  0.000E+00  3.705E+05  0.000E+00  0.000E+00   0.0E+00
   15   81  7.972E+01  0.000E+00  0.000E+00  0.000E+00  0.000E+00  7.326E+00  0.000E+00   0.0E+00
   15   83  7.965E+01  0.000E+00  0.000E+00  0.000E+00  3.294E+05  0.000E+00  0.000E+00   0.0E+00
   15   84  7.972E+01  4.563E+09  1.304E-02  3.423E-03  0.000E+00  0.000E+00  0.000E+00   6.6E-01
   15   86  7.754E+01  0.000E+00  0.000E+00  0.000E+00  0.000E+00  3.771E-01  0.000E+00   0.0E+00
   15   87  7.745E+01  0.000E+00  0.000E+00  0.000E+00  0.000E+00  5.734E+01  0.000E+00   0.0E+00
   15   88  7.741E+01  0.000E+00  0.000E+00  0.000E+00  6.562E+05  0.000E+00  0.000E+00   0.0E+00
   15   90  7.719E+01  1.356E+08  3.634E-04  9.233E-05  0.000E+00  0.000E+00  0.000E+00   1.0E+00
   15   92  7.709E+01  0.000E+00  0.000E+00  0.000E+00  0.000E+00  0.000E+00  3.078E+02   0.0E+00
   15   94  7.696E+01  0.000E+00  0.000E+00  0.000E+00  0.000E+00  0.000E+00  6.382E+01   0.0E+00
   15   97  7.649E+01  1.658E+10  4.362E-02  1.099E-02  0.000E+00  0.000E+00  0.000E+00   9.4E-01
   15   98  7.599E+01  0.000E+00  0.000E+00  0.000E+00  0.000E+00  3.606E-02  0.000E+00   0.0E+00
   15  101  7.597E+01  0.000E+00  0.000E+00  0.000E+00  3.892E+05  0.000E+00  0.000E+00   0.0E+00
   15  103  7.591E+01  0.000E+00  0.000E+00  0.000E+00  7.442E+05  0.000E+00  0.000E+00   0.0E+00
   15  104  7.590E+01  0.000E+00  0.000E+00  0.000E+00  0.000E+00  0.000E+00  6.290E-04   0.0E+00
   15  114  7.490E+01  0.000E+00  0.000E+00  0.000E+00  0.000E+00  0.000E+00  1.910E+01   0.0E+00
   15  115  7.488E+01  0.000E+00  0.000E+00  0.000E+00  0.000E+00  0.000E+00  8.084E+01   0.0E+00
   15  117  7.449E+01  2.929E+10  7.309E-02  1.792E-02  0.000E+00  0.000E+00  0.000E+00   9.5E-01
   15  121  7.380E+01  0.000E+00  0.000E+00  0.000E+00  1.195E+06  0.000E+00  0.000E+00   0.0E+00
   16   17  2.672E+04  0.000E+00  0.000E+00  0.000E+00  0.000E+00  8.996E-01  0.000E+00   0.0E+00
   16   18  8.838E+03  0.000E+00  0.000E+00  0.000E+00  3.403E-04  0.000E+00  0.000E+00   0.0E+00
   16   21  3.594E+03  0.000E+00  0.000E+00  0.000E+00  8.016E-03  0.000E+00  0.000E+00   0.0E+00
   16   23  1.940E+03  0.000E+00  0.000E+00  0.000E+00  0.000E+00  7.500E+01  0.000E+00   0.0E+00
   16   24  1.697E+03  0.000E+00  0.000E+00  0.000E+00  1.787E-01  0.000E+00  0.000E+00   0.0E+00
   16   25  1.588E+03  0.000E+00  0.000E+00  0.000E+00  3.746E-01  0.000E+00  0.000E+00   0.0E+00
   16   27  9.231E+02  0.000E+00  0.000E+00  0.000E+00  0.000E+00  2.597E+02  0.000E+00   0.0E+00
   16   28  2.791E+02  2.895E+06  1.014E-04  9.319E-05  0.000E+00  0.000E+00  0.000E+00   8.6E-02
   16   31  1.829E+02  0.000E+00  0.000E+00  0.000E+00  0.000E+00  1.176E+00  0.000E+00   0.0E+00
   16   32  1.811E+02  0.000E+00  0.000E+00  0.000E+00  7.513E+02  0.000E+00  0.000E+00   0.0E+00
   16   33  1.769E+02  0.000E+00  0.000E+00  0.000E+00  0.000E+00  1.275E+01  0.000E+00   0.0E+00
   16   34  1.491E+02  0.000E+00  0.000E+00  0.000E+00  1.661E+05  0.000E+00  0.000E+00   0.0E+00
   16   35  1.485E+02  0.000E+00  0.000E+00  0.000E+00  0.000E+00  5.926E-01  0.000E+00   0.0E+00
   16   37  1.409E+02  0.000E+00  0.000E+00  0.000E+00  0.000E+00  5.357E-02  0.000E+00   0.0E+00
   16   38  1.354E+02  4.885E+09  4.025E-02  1.794E-02  0.000E+00  0.000E+00  0.000E+00   1.1E+00
   16   39  1.346E+02  0.000E+00  0.000E+00  0.000E+00  0.000E+00  0.000E+00  2.821E+00   0.0E+00
   16   41  1.337E+02  3.351E+08  2.694E-03  1.186E-03  0.000E+00  0.000E+00  0.000E+00   9.5E-01
   16   42  1.333E+02  0.000E+00  0.000E+00  0.000E+00  0.000E+00  0.000E+00  1.257E-02   0.0E+00
   16   44  1.288E+02  2.146E+08  1.602E-03  6.795E-04  0.000E+00  0.000E+00  0.000E+00   2.4E+00
   16   45  1.280E+02  0.000E+00  0.000E+00  0.000E+00  0.000E+00  0.000E+00  7.898E+00   0.0E+00
   16   46  1.274E+02  2.302E+08  1.681E-03  7.054E-04  0.000E+00  0.000E+00  0.000E+00   1.3E+00
   16   48  1.257E+02  6.912E+08  4.912E-03  2.032E-03  0.000E+00  0.000E+00  0.000E+00   2.5E+00
   16   49  1.257E+02  0.000E+00  0.000E+00  0.000E+00  0.000E+00  0.000E+00  2.543E+01   0.0E+00
   16   51  1.222E+02  0.000E+00  0.000E+00  0.000E+00  0.000E+00  0.000E+00  1.655E+00   0.0E+00
   16   53  1.200E+02  0.000E+00  0.000E+00  0.000E+00  0.000E+00  1.904E-01  0.000E+00   0.0E+00
   16   55  1.195E+02  0.000E+00  0.000E+00  0.000E+00  5.572E+05  0.000E+00  0.000E+00   0.0E+00
   16   57  1.188E+02  0.000E+00  0.000E+00  0.000E+00  2.207E+05  0.000E+00  0.000E+00   0.0E+00
   16   59  1.169E+02  0.000E+00  0.000E+00  0.000E+00  0.000E+00  2.841E-02  0.000E+00   0.0E+00
   16   62  1.142E+02  0.000E+00  0.000E+00  0.000E+00  8.421E+03  0.000E+00  0.000E+00   0.0E+00
   16   65  1.141E+02  0.000E+00  0.000E+00  0.000E+00  3.381E+04  0.000E+00  0.000E+00   0.0E+00
   16   67  1.137E+02  0.000E+00  0.000E+00  0.000E+00  0.000E+00  0.000E+00  4.076E+02   0.0E+00
   16   69  1.135E+02  1.600E+11  9.276E-01  3.467E-01  0.000E+00  0.000E+00  0.000E+00   9.5E-01
   16   70  1.135E+02  0.000E+00  0.000E+00  0.000E+00  0.000E+00  0.000E+00  1.154E+02   0.0E+00
   16   71  1.120E+02  0.000E+00  0.000E+00  0.000E+00  0.000E+00  2.246E+00  0.000E+00   0.0E+00
   16   74  1.091E+02  0.000E+00  0.000E+00  0.000E+00  0.000E+00  0.000E+00  1.631E+00   0.0E+00
   16   76  8.841E+01  0.000E+00  0.000E+00  0.000E+00  7.096E+04  0.000E+00  0.000E+00   0.0E+00
   16   77  8.827E+01  0.000E+00  0.000E+00  0.000E+00  0.000E+00  2.503E-01  0.000E+00   0.0E+00
   16   78  8.583E+01  1.860E+09  6.163E-03  1.741E-03  0.000E+00  0.000E+00  0.000E+00   1.2E+00
   16   79  8.562E+01  0.000E+00  0.000E+00  0.000E+00  0.000E+00  0.000E+00  3.451E-01   0.0E+00
   16   81  8.548E+01  1.226E+08  4.028E-04  1.133E-04  0.000E+00  0.000E+00  0.000E+00   1.3E+00
   16   83  8.540E+01  0.000E+00  0.000E+00  0.000E+00  0.000E+00  0.000E+00  1.343E-02   0.0E+00
   16   84  8.549E+01  0.000E+00  0.000E+00  0.000E+00  0.000E+00  3.846E-02  0.000E+00   0.0E+00
   16   86  8.298E+01  3.532E+07  1.094E-04  2.988E-05  0.000E+00  0.000E+00  0.000E+00   6.4E-01
   16   87  8.288E+01  6.614E+07  2.043E-04  5.575E-05  0.000E+00  0.000E+00  0.000E+00   1.0E+00
   16   88  8.283E+01  0.000E+00  0.000E+00  0.000E+00  0.000E+00  0.000E+00  8.313E-02   0.0E+00
   16   90  8.258E+01  0.000E+00  0.000E+00  0.000E+00  0.000E+00  3.927E-01  0.000E+00   0.0E+00
   16   92  8.246E+01  0.000E+00  0.000E+00  0.000E+00  2.653E+05  0.000E+00  0.000E+00   0.0E+00
   16   94  8.232E+01  0.000E+00  0.000E+00  0.000E+00  1.086E+05  0.000E+00  0.000E+00   0.0E+00
   16   97  8.178E+01  0.000E+00  0.000E+00  0.000E+00  0.000E+00  2.762E-02  0.000E+00   0.0E+00
   16   98  8.121E+01  5.986E+10  1.775E-01  4.746E-02  0.000E+00  0.000E+00  0.000E+00   9.7E-01
   16  101  8.119E+01  0.000E+00  0.000E+00  0.000E+00  0.000E+00  0.000E+00  4.392E+01   0.0E+00
   16  103  8.112E+01  0.000E+00  0.000E+00  0.000E+00  0.000E+00  0.000E+00  3.547E+02   0.0E+00
   16  104  8.111E+01  0.000E+00  0.000E+00  0.000E+00  1.263E+07  0.000E+00  0.000E+00   0.0E+00
   16  114  7.996E+01  0.000E+00  0.000E+00  0.000E+00  3.522E+03  0.000E+00  0.000E+00   0.0E+00
   16  115  7.994E+01  0.000E+00  0.000E+00  0.000E+00  9.092E+03  0.000E+00  0.000E+00   0.0E+00
   16  117  7.950E+01  0.000E+00  0.000E+00  0.000E+00  0.000E+00  3.518E-01  0.000E+00   0.0E+00
   16  121  7.872E+01  0.000E+00  0.000E+00  0.000E+00  0.000E+00  0.000E+00  2.713E-02   0.0E+00
   17   18  1.321E+04  0.000E+00  0.000E+00  0.000E+00  5.798E-05  5.616E+00  0.000E+00   0.0E+00
   17   20  6.439E+03  0.000E+00  0.000E+00  0.000E+00  3.719E-04  0.000E+00  0.000E+00   0.0E+00
   17   21  4.152E+03  0.000E+00  0.000E+00  0.000E+00  2.342E-03  2.014E+00  0.000E+00   0.0E+00
   17   22  3.394E+03  0.000E+00  0.000E+00  0.000E+00  3.004E-02  0.000E+00  0.000E+00   0.0E+00
   17   23  2.092E+03  0.000E+00  0.000E+00  0.000E+00  4.913E-01  1.874E+02  0.000E+00   0.0E+00
   17   24  1.812E+03  0.000E+00  0.000E+00  0.000E+00  1.270E-02  3.638E+01  0.000E+00   0.0E+00
   17   25  1.688E+03  0.000E+00  0.000E+00  0.000E+00  5.556E-02  1.070E+02  0.000E+00   0.0E+00
   17   26  1.665E+03  0.000E+00  0.000E+00  0.000E+00  3.812E-01  0.000E+00  0.000E+00   0.0E+00
   17   27  9.562E+02  0.000E+00  0.000E+00  0.000E+00  6.104E-01  3.939E+02  0.000E+00   0.0E+00
   17   28  2.820E+02  8.754E+06  1.044E-04  2.908E-04  0.000E+00  0.000E+00  7.629E-03   8.9E-02
   17   29  2.551E+02  2.118E+06  6.889E-06  1.736E-05  0.000E+00  0.000E+00  0.000E+00   2.3E+00
   17   30  1.847E+02  0.000E+00  0.000E+00  0.000E+00  0.000E+00  1.171E-02  0.000E+00   0.0E+00
   17   31  1.841E+02  0.000E+00  0.000E+00  0.000E+00  2.628E+02  3.292E+00  0.000E+00   0.0E+00
   17   32  1.823E+02  0.000E+00  0.000E+00  0.000E+00  1.989E+03  8.603E-02  0.000E+00   0.0E+00
   17   33  1.781E+02  0.000E+00  0.000E+00  0.000E+00  3.062E-01  1.202E+01  0.000E+00   0.0E+00
   17   34  1.500E+02  0.000E+00  0.000E+00  0.000E+00  4.388E+05  3.437E-01  0.000E+00   0.0E+00
   17   35  1.493E+02  0.000E+00  0.000E+00  0.000E+00  5.053E+04  3.299E-01  0.000E+00   0.0E+00
   17   36  1.420E+02  0.000E+00  0.000E+00  0.000E+00  0.000E+00  4.378E-01  0.000E+00   0.0E+00
   17   37  1.417E+02  0.000E+00  0.000E+00  0.000E+00  4.367E+04  1.933E-01  0.000E+00   0.0E+00
   17   38  1.361E+02  1.123E+10  3.115E-02  4.186E-02  0.000E+00  0.000E+00  1.767E+01   1.1E+00
   17   39  1.353E+02  5.091E+08  2.328E-03  3.110E-03  0.000E+00  0.000E+00  1.504E-01   9.2E-01
   17   40  1.353E+02  0.000E+00  0.000E+00  0.000E+00  0.000E+00  0.000E+00  2.382E+00   0.0E+00
   17   41  1.344E+02  8.684E+07  2.351E-04  3.119E-04  0.000E+00  0.000E+00  6.049E+00   1.8E+00
   17   42  1.339E+02  1.489E+09  6.675E-03  8.830E-03  0.000E+00  0.000E+00  6.027E+00   1.1E+00
   17   43  1.309E+02  3.073E+09  2.632E-03  3.403E-03  0.000E+00  0.000E+00  0.000E+00   1.1E+00
   17   44  1.295E+02  1.047E+08  2.630E-04  3.363E-04  0.000E+00  0.000E+00  1.564E-02   3.1E-02
   17   45  1.286E+02  6.411E+08  2.651E-03  3.368E-03  0.000E+00  0.000E+00  4.276E+01   1.8E+00
   17   46  1.281E+02  2.110E+07  5.187E-05  6.560E-05  0.000E+00  0.000E+00  8.813E-01   3.1E-01
   17   47  1.266E+02  0.000E+00  0.000E+00  0.000E+00  0.000E+00  0.000E+00  2.182E+01   0.0E+00
   17   48  1.263E+02  1.348E+08  3.222E-04  4.019E-04  0.000E+00  0.000E+00  6.702E-01   7.3E+00
   17   49  1.263E+02  1.008E+09  4.020E-03  5.014E-03  0.000E+00  0.000E+00  1.550E+02   2.2E+00
   17   50  1.233E+02  2.205E+08  1.676E-04  2.042E-04  0.000E+00  0.000E+00  0.000E+00   1.5E+00
   17   51  1.228E+02  1.049E+08  3.952E-04  4.793E-04  0.000E+00  0.000E+00  5.269E+00   1.3E+00
   17   52  1.208E+02  0.000E+00  0.000E+00  0.000E+00  0.000E+00  2.669E-03  0.000E+00   0.0E+00
   17   53  1.205E+02  0.000E+00  0.000E+00  0.000E+00  1.009E+06  5.069E+00  0.000E+00   0.0E+00
   17   55  1.200E+02  0.000E+00  0.000E+00  0.000E+00  5.742E+05  2.032E+00  0.000E+00   0.0E+00
   17   56  1.198E+02  0.000E+00  0.000E+00  0.000E+00  1.992E+05  0.000E+00  0.000E+00   0.0E+00
   17   57  1.193E+02  0.000E+00  0.000E+00  0.000E+00  2.909E+04  6.071E-01  0.000E+00   0.0E+00
   17   58  1.191E+02  0.000E+00  0.000E+00  0.000E+00  4.237E+05  0.000E+00  0.000E+00   0.0E+00
   17   59  1.174E+02  0.000E+00  0.000E+00  0.000E+00  3.977E+05  1.673E-03  0.000E+00   0.0E+00
   17   62  1.147E+02  0.000E+00  0.000E+00  0.000E+00  2.483E+04  9.347E-02  0.000E+00   0.0E+00
   17   63  1.145E+02  0.000E+00  0.000E+00  0.000E+00  0.000E+00  0.000E+00  1.304E+02   0.0E+00
   17   65  1.146E+02  0.000E+00  0.000E+00  0.000E+00  5.256E+02  1.036E-01  0.000E+00   0.0E+00
   17   66  1.144E+02  0.000E+00  0.000E+00  0.000E+00  4.299E+04  0.000E+00  0.000E+00   0.0E+00
   17   67  1.142E+02  4.912E+10  1.600E-01  1.805E-01  0.000E+00  0.000E+00  2.151E+02   9.7E-01
   17   68  1.142E+02  0.000E+00  0.000E+00  0.000E+00  0.000E+00  0.000E+00  3.871E+01   0.0E+00
   17   69  1.140E+02  1.482E+11  2.888E-01  3.252E-01  0.000E+00  0.000E+00  2.898E+02   9.4E-01
   17   70  1.140E+02  1.323E+11  4.296E-01  4.837E-01  0.000E+00  0.000E+00  1.437E+03   9.5E-01
   17   71  1.125E+02  0.000E+00  0.000E+00  0.000E+00  7.932E+04  3.574E+00  0.000E+00   0.0E+00
   17   72  1.099E+02  0.000E+00  0.000E+00  0.000E+00  0.000E+00  0.000E+00  1.403E+01   0.0E+00
   17   74  1.096E+02  1.715E+10  5.147E-02  5.571E-02  0.000E+00  0.000E+00  1.039E+01   9.5E-01
   17   75  1.096E+02  0.000E+00  0.000E+00  0.000E+00  0.000E+00  0.000E+00  2.314E+01   0.0E+00
   17   76  8.870E+01  0.000E+00  0.000E+00  0.000E+00  1.899E+05  8.110E-02  0.000E+00   0.0E+00
   17   77  8.857E+01  0.000E+00  0.000E+00  0.000E+00  2.160E+04  1.765E-01  0.000E+00   0.0E+00
   17   78  8.611E+01  4.272E+09  4.748E-03  4.038E-03  0.000E+00  0.000E+00  1.687E+01   1.2E+00
   17   79  8.589E+01  1.996E+08  3.680E-04  3.121E-04  0.000E+00  0.000E+00  2.759E+00   1.4E+00
   17   80  8.587E+01  0.000E+00  0.000E+00  0.000E+00  0.000E+00  0.000E+00  2.865E-01   0.0E+00
   17   81  8.575E+01  8.408E+07  9.269E-05  7.850E-05  0.000E+00  0.000E+00  5.006E+00   1.2E+00
   17   82  8.583E+01  0.000E+00  0.000E+00  0.000E+00  0.000E+00  1.426E-01  0.000E+00   0.0E+00
   17   83  8.568E+01  5.710E+08  1.047E-03  8.862E-04  0.000E+00  0.000E+00  5.187E+00   1.2E+00
   17   84  8.576E+01  0.000E+00  0.000E+00  0.000E+00  1.669E+04  5.647E-02  0.000E+00   0.0E+00
   17   85  8.485E+01  9.948E+08  3.579E-04  2.999E-04  0.000E+00  0.000E+00  0.000E+00   1.2E+00
   17   86  8.324E+01  1.441E+04  1.497E-08  1.230E-08  0.000E+00  0.000E+00  9.615E-04   8.5E+02
   17   87  8.313E+01  4.144E+05  4.293E-07  3.525E-07  0.000E+00  0.000E+00  4.325E-01   4.2E+00
   17   88  8.309E+01  9.523E+07  1.643E-04  1.348E-04  0.000E+00  0.000E+00  2.802E-01   9.0E-01
   17   89  8.291E+01  0.000E+00  0.000E+00  0.000E+00  0.000E+00  1.146E-01  0.000E+00   0.0E+00
   17   90  8.283E+01  0.000E+00  0.000E+00  0.000E+00  4.958E+05  3.329E+00  0.000E+00   0.0E+00
   17   92  8.272E+01  0.000E+00  0.000E+00  0.000E+00  2.572E+05  1.964E+00  0.000E+00   0.0E+00
   17   93  8.268E+01  0.000E+00  0.000E+00  0.000E+00  1.004E+05  0.000E+00  0.000E+00   0.0E+00
   17   94  8.258E+01  0.000E+00  0.000E+00  0.000E+00  1.186E+04  3.073E-01  0.000E+00   0.0E+00
   17   95  8.253E+01  0.000E+00  0.000E+00  0.000E+00  2.091E+05  0.000E+00  0.000E+00   0.0E+00
   17   96  8.237E+01  2.985E+08  1.012E-04  8.233E-05  0.000E+00  0.000E+00  0.000E+00   1.6E+00
   17   97  8.203E+01  0.000E+00  0.000E+00  0.000E+00  1.346E+05  1.086E-01  0.000E+00   0.0E+00
   17   98  8.145E+01  5.403E+10  5.374E-02  4.323E-02  0.000E+00  0.000E+00  2.116E+02   9.6E-01
   17  101  8.143E+01  6.096E+10  1.010E-01  8.124E-02  0.000E+00  0.000E+00  1.005E+03   9.7E-01
   17  102  8.138E+01  0.000E+00  0.000E+00  0.000E+00  0.000E+00  0.000E+00  2.751E+01   0.0E+00
   17  103  8.136E+01  8.460E+09  1.400E-02  1.125E-02  0.000E+00  0.000E+00  3.354E+02   9.8E-01
   17  104  8.136E+01  0.000E+00  0.000E+00  0.000E+00  1.507E+07  2.842E-02  0.000E+00   0.0E+00
   17  105  8.136E+01  0.000E+00  0.000E+00  0.000E+00  0.000E+00  0.000E+00  9.581E+01   0.0E+00
   17  106  8.135E+01  0.000E+00  0.000E+00  0.000E+00  1.014E+07  0.000E+00  0.000E+00   0.0E+00
   17  110  8.130E+01  0.000E+00  0.000E+00  0.000E+00  4.768E+06  0.000E+00  0.000E+00   0.0E+00
   17  114  8.020E+01  0.000E+00  0.000E+00  0.000E+00  7.831E+03  3.315E-02  0.000E+00   0.0E+00
   17  115  8.018E+01  0.000E+00  0.000E+00  0.000E+00  1.873E+03  5.482E-02  0.000E+00   0.0E+00
   17  116  8.013E+01  0.000E+00  0.000E+00  0.000E+00  2.024E+04  0.000E+00  0.000E+00   0.0E+00
   17  117  7.973E+01  0.000E+00  0.000E+00  0.000E+00  5.403E+04  4.891E-01  0.000E+00   0.0E+00
   17  118  7.899E+01  0.000E+00  0.000E+00  0.000E+00  0.000E+00  0.000E+00  8.884E+00   0.0E+00
   17  120  7.896E+01  0.000E+00  0.000E+00  0.000E+00  0.000E+00  0.000E+00  2.546E+01   0.0E+00
   17  121  7.895E+01  5.467E+09  8.514E-03  6.639E-03  0.000E+00  0.000E+00  1.337E+01   9.7E-01
   17  122  7.889E+01  0.000E+00  0.000E+00  0.000E+00  1.364E+06  0.000E+00  0.000E+00   0.0E+00
   18   19  3.197E+04  0.000E+00  0.000E+00  0.000E+00  8.730E-08  0.000E+00  0.000E+00   0.0E+00
   18   20  1.257E+04  0.000E+00  0.000E+00  0.000E+00  1.083E-05  4.963E-02  0.000E+00   0.0E+00
   18   21  6.056E+03  0.000E+00  0.000E+00  0.000E+00  1.958E-03  1.657E-01  0.000E+00   0.0E+00
   18   22  4.568E+03  0.000E+00  0.000E+00  0.000E+00  2.444E-02  1.062E+01  0.000E+00   0.0E+00
   18   23  2.486E+03  0.000E+00  0.000E+00  0.000E+00  1.134E-01  8.266E+01  0.000E+00   0.0E+00
   18   24  2.100E+03  0.000E+00  0.000E+00  0.000E+00  7.588E-02  1.755E+01  0.000E+00   0.0E+00
   18   25  1.936E+03  0.000E+00  0.000E+00  0.000E+00  2.546E-01  4.614E+02  0.000E+00   0.0E+00
   18   26  1.905E+03  0.000E+00  0.000E+00  0.000E+00  2.090E-01  9.339E+01  0.000E+00   0.0E+00
   18   27  1.031E+03  0.000E+00  0.000E+00  0.000E+00  1.720E+00  8.269E+00  0.000E+00   0.0E+00
   18   28  2.882E+02  1.445E+07  1.080E-04  5.121E-04  0.000E+00  0.000E+00  1.266E-02   9.5E-02
   18   29  2.602E+02  0.000E+00  0.000E+00  0.000E+00  0.000E+00  0.000E+00  7.436E-01   0.0E+00
   18   30  1.873E+02  0.000E+00  0.000E+00  0.000E+00  5.688E+02  0.000E+00  0.000E+00   0.0E+00
   18   31  1.867E+02  0.000E+00  0.000E+00  0.000E+00  1.094E+03  7.668E-02  0.000E+00   0.0E+00
   18   32  1.849E+02  0.000E+00  0.000E+00  0.000E+00  2.205E+03  4.786E+00  0.000E+00   0.0E+00
   18   33  1.805E+02  0.000E+00  0.000E+00  0.000E+00  6.807E+01  4.389E+00  0.000E+00   0.0E+00
   18   34  1.517E+02  0.000E+00  0.000E+00  0.000E+00  4.860E+05  2.457E-03  0.000E+00   0.0E+00
   18   35  1.510E+02  0.000E+00  0.000E+00  0.000E+00  3.449E+05  7.497E-03  0.000E+00   0.0E+00
   18   36  1.436E+02  0.000E+00  0.000E+00  0.000E+00  2.611E+05  0.000E+00  0.000E+00   0.0E+00
   18   37  1.432E+02  0.000E+00  0.000E+00  0.000E+00  1.072E+05  8.814E-01  0.000E+00   0.0E+00
   18   38  1.375E+02  9.224E+09  1.568E-02  3.548E-02  0.000E+00  0.000E+00  1.739E+01   1.1E+00
   18   39  1.367E+02  5.954E+08  1.667E-03  3.751E-03  0.000E+00  0.000E+00  8.294E+00   1.3E+00
   18   40  1.367E+02  2.146E+08  8.415E-04  1.893E-03  0.000E+00  0.000E+00  1.151E-01   7.4E-01
   18   41  1.358E+02  2.277E+09  3.775E-03  8.434E-03  0.000E+00  0.000E+00  3.849E+00   1.1E+00
   18   42  1.353E+02  6.195E+09  1.701E-02  3.788E-02  0.000E+00  0.000E+00  4.970E+01   1.1E+00
   18   43  1.322E+02  0.000E+00  0.000E+00  0.000E+00  0.000E+00  0.000E+00  4.815E+01   0.0E+00
   18   44  1.307E+02  2.191E+08  3.369E-04  7.250E-04  0.000E+00  0.000E+00  2.811E-01   5.3E-01
   18   45  1.299E+02  1.050E+09  2.657E-03  5.681E-03  0.000E+00  0.000E+00  1.163E+00   5.3E-01
   18   46  1.293E+02  1.702E+09  2.561E-03  5.450E-03  0.000E+00  0.000E+00  1.728E+01   1.1E+00
   18   47  1.278E+02  1.398E+09  4.792E-03  1.008E-02  0.000E+00  0.000E+00  4.372E+02   2.2E+00
   18   48  1.275E+02  2.506E+07  3.665E-05  7.693E-05  0.000E+00  0.000E+00  3.689E+00   8.3E-01
   18   49  1.275E+02  1.239E+06  3.019E-06  6.338E-06  0.000E+00  0.000E+00  7.406E+01   3.2E+02
   18   50  1.245E+02  0.000E+00  0.000E+00  0.000E+00  0.000E+00  0.000E+00  3.819E+01   0.0E+00
   18   51  1.239E+02  3.772E+08  8.687E-04  1.772E-03  0.000E+00  0.000E+00  4.731E+00   2.0E-01
   18   52  1.219E+02  0.000E+00  0.000E+00  0.000E+00  2.221E+06  0.000E+00  0.000E+00   0.0E+00
   18   53  1.216E+02  0.000E+00  0.000E+00  0.000E+00  7.566E+05  5.018E-01  0.000E+00   0.0E+00
   18   54  1.212E+02  0.000E+00  0.000E+00  0.000E+00  1.506E+05  0.000E+00  0.000E+00   0.0E+00
   18   55  1.211E+02  0.000E+00  0.000E+00  0.000E+00  1.357E+02  1.156E+01  0.000E+00   0.0E+00
   18   56  1.209E+02  0.000E+00  0.000E+00  0.000E+00  5.734E+04  7.536E-01  0.000E+00   0.0E+00
   18   57  1.204E+02  0.000E+00  0.000E+00  0.000E+00  3.832E+05  5.374E-02  0.000E+00   0.0E+00
   18   58  1.202E+02  0.000E+00  0.000E+00  0.000E+00  1.124E+06  4.042E+00  0.000E+00   0.0E+00
   18   59  1.185E+02  0.000E+00  0.000E+00  0.000E+00  5.073E+05  3.342E-03  0.000E+00   0.0E+00
   18   61  1.158E+02  0.000E+00  0.000E+00  0.000E+00  0.000E+00  0.000E+00  1.502E+00   0.0E+00
   18   62  1.157E+02  0.000E+00  0.000E+00  0.000E+00  4.097E+04  7.348E-03  0.000E+00   0.0E+00
   18   63  1.155E+02  1.844E+08  5.160E-04  9.806E-04  0.000E+00  0.000E+00  5.868E+01   9.8E-01
   18   64  1.154E+02  0.000E+00  0.000E+00  0.000E+00  0.000E+00  0.000E+00  4.672E+02   0.0E+00
   18   65  1.156E+02  0.000E+00  0.000E+00  0.000E+00  3.029E+05  4.590E-03  0.000E+00   0.0E+00
   18   66  1.154E+02  0.000E+00  0.000E+00  0.000E+00  1.384E+05  2.969E-01  0.000E+00   0.0E+00
   18   67  1.152E+02  1.792E+10  3.565E-02  6.759E-02  0.000E+00  0.000E+00  9.939E+01   9.7E-01
   18   68  1.152E+02  2.080E+11  5.788E-01  1.097E+00  0.000E+00  0.000E+00  1.376E+03   9.7E-01
   18   69  1.150E+02  1.560E+10  1.856E-02  3.513E-02  0.000E+00  0.000E+00  4.713E+01   9.2E-01
   18   70  1.150E+02  8.577E+10  1.701E-01  3.219E-01  0.000E+00  0.000E+00  1.900E+03   9.3E-01
   18   71  1.135E+02  0.000E+00  0.000E+00  0.000E+00  1.010E+04  6.137E-01  0.000E+00   0.0E+00
   18   72  1.108E+02  1.015E+06  2.619E-06  4.778E-06  0.000E+00  0.000E+00  5.441E+00   9.1E-01
   18   73  1.108E+02  0.000E+00  0.000E+00  0.000E+00  0.000E+00  0.000E+00  4.359E+01   0.0E+00
   18   74  1.105E+02  4.945E+09  9.054E-03  1.647E-02  0.000E+00  0.000E+00  2.191E-04   9.4E-01
   18   75  1.105E+02  4.823E+10  1.235E-01  2.247E-01  0.000E+00  0.000E+00  5.723E+02   9.5E-01
   18   76  8.930E+01  0.000E+00  0.000E+00  0.000E+00  2.163E+05  5.728E-03  0.000E+00   0.0E+00
   18   77  8.916E+01  0.000E+00  0.000E+00  0.000E+00  1.490E+05  3.461E-03  0.000E+00   0.0E+00
   18   78  8.667E+01  3.200E+09  2.162E-03  3.085E-03  0.000E+00  0.000E+00  1.326E+01   1.2E+00
   18   79  8.645E+01  4.384E+08  4.913E-04  6.991E-04  0.000E+00  0.000E+00  4.176E+00   1.0E+00
   18   80  8.643E+01  5.340E+07  8.373E-05  1.191E-04  0.000E+00  0.000E+00  8.754E+00   1.7E+00
   18   81  8.631E+01  9.811E+08  6.575E-04  9.341E-04  0.000E+00  0.000E+00  2.995E+00   1.1E+00
   18   82  8.639E+01  0.000E+00  0.000E+00  0.000E+00  1.036E+05  0.000E+00  0.000E+00   0.0E+00
   18   83  8.624E+01  2.657E+09  2.962E-03  4.205E-03  0.000E+00  0.000E+00  4.774E+01   1.1E+00
   18   84  8.632E+01  0.000E+00  0.000E+00  0.000E+00  4.752E+04  3.085E-01  0.000E+00   0.0E+00
   18   85  8.539E+01  0.000E+00  0.000E+00  0.000E+00  0.000E+00  0.000E+00  6.510E+01   0.0E+00
   18   86  8.377E+01  2.848E+07  1.798E-05  2.479E-05  0.000E+00  0.000E+00  2.166E+00   1.1E+00
   18   87  8.366E+01  7.499E+08  4.721E-04  6.502E-04  0.000E+00  0.000E+00  1.268E+01   1.4E+00
   18   88  8.361E+01  6.136E+07  6.431E-05  8.852E-05  0.000E+00  0.000E+00  2.779E+00   2.0E+00
   18   89  8.343E+01  0.000E+00  0.000E+00  0.000E+00  9.865E+05  0.000E+00  0.000E+00   0.0E+00
   18   90  8.336E+01  0.000E+00  0.000E+00  0.000E+00  3.033E+05  2.243E-01  0.000E+00   0.0E+00
   18   91  8.328E+01  0.000E+00  0.000E+00  0.000E+00  7.769E+04  0.000E+00  0.000E+00   0.0E+00
   18   92  8.324E+01  0.000E+00  0.000E+00  0.000E+00  2.248E+03  7.472E+00  0.000E+00   0.0E+00
   18   93  8.320E+01  0.000E+00  0.000E+00  0.000E+00  2.948E+04  4.845E-01  0.000E+00   0.0E+00
   18   94  8.310E+01  0.000E+00  0.000E+00  0.000E+00  1.825E+05  6.567E-02  0.000E+00   0.0E+00
   18   95  8.304E+01  0.000E+00  0.000E+00  0.000E+00  5.230E+05  2.584E+00  0.000E+00   0.0E+00
   18   96  8.289E+01  0.000E+00  0.000E+00  0.000E+00  0.000E+00  0.000E+00  1.497E+01   0.0E+00
   18   97  8.254E+01  0.000E+00  0.000E+00  0.000E+00  2.504E+05  6.167E-01  0.000E+00   0.0E+00
   18   98  8.196E+01  5.387E+09  3.255E-03  4.391E-03  0.000E+00  0.000E+00  2.824E+01   9.6E-01
   18  100  8.195E+01  0.000E+00  0.000E+00  0.000E+00  0.000E+00  0.000E+00  1.865E+00   0.0E+00
   18  101  8.194E+01  3.462E+10  3.485E-02  4.701E-02  0.000E+00  0.000E+00  1.313E+03   9.6E-01
   18  102  8.188E+01  8.124E+10  1.143E-01  1.541E-01  0.000E+00  0.000E+00  1.227E+03   9.8E-01
   18  103  8.187E+01  2.354E+09  2.365E-03  3.188E-03  0.000E+00  0.000E+00  2.411E+02   9.8E-01
   18  104  8.186E+01  0.000E+00  0.000E+00  0.000E+00  3.167E+06  2.294E-02  0.000E+00   0.0E+00
   18  105  8.186E+01  1.245E+08  1.751E-04  2.360E-04  0.000E+00  0.000E+00  8.400E+01   9.7E-01
   18  106  8.186E+01  0.000E+00  0.000E+00  0.000E+00  9.098E+06  8.295E-03  0.000E+00   0.0E+00
   18  107  8.185E+01  0.000E+00  0.000E+00  0.000E+00  0.000E+00  0.000E+00  3.655E+02   0.0E+00
   18  110  8.181E+01  0.000E+00  0.000E+00  0.000E+00  2.703E+06  4.954E-02  0.000E+00   0.0E+00
   18  111  8.180E+01  0.000E+00  0.000E+00  0.000E+00  1.959E+07  0.000E+00  0.000E+00   0.0E+00
   18  112  8.178E+01  0.000E+00  0.000E+00  0.000E+00  9.021E+03  0.000E+00  0.000E+00   0.0E+00
   18  114  8.069E+01  0.000E+00  0.000E+00  0.000E+00  8.249E+03  2.774E-02  0.000E+00   0.0E+00
   18  115  8.067E+01  0.000E+00  0.000E+00  0.000E+00  1.375E+05  3.420E-01  0.000E+00   0.0E+00
   18  116  8.062E+01  0.000E+00  0.000E+00  0.000E+00  4.586E+04  1.115E-01  0.000E+00   0.0E+00
   18  117  8.022E+01  0.000E+00  0.000E+00  0.000E+00  2.667E+04  7.503E-01  0.000E+00   0.0E+00
   18  118  7.946E+01  1.060E+07  1.405E-05  1.838E-05  0.000E+00  0.000E+00  2.035E+00   9.5E-01
   18  119  7.945E+01  0.000E+00  0.000E+00  0.000E+00  0.000E+00  0.000E+00  2.952E+01   0.0E+00
   18  120  7.943E+01  1.522E+10  2.016E-02  2.636E-02  0.000E+00  0.000E+00  4.428E+02   9.6E-01
   18  121  7.943E+01  1.490E+09  1.409E-03  1.842E-03  0.000E+00  0.000E+00  8.795E-02   9.5E-01
   18  122  7.936E+01  0.000E+00  0.000E+00  0.000E+00  5.662E+05  9.928E-03  0.000E+00   0.0E+00
   18  123  7.936E+01  0.000E+00  0.000E+00  0.000E+00  3.982E+06  0.000E+00  0.000E+00   0.0E+00
   18  124  7.936E+01  0.000E+00  0.000E+00  0.000E+00  3.618E+04  0.000E+00  0.000E+00   0.0E+00
   19   20  2.070E+04  0.000E+00  0.000E+00  0.000E+00  9.239E-06  2.109E+00  0.000E+00   0.0E+00
   19   21  7.472E+03  0.000E+00  0.000E+00  0.000E+00  3.732E-04  0.000E+00  0.000E+00   0.0E+00
   19   22  5.330E+03  0.000E+00  0.000E+00  0.000E+00  1.355E-02  5.092E+00  0.000E+00   0.0E+00
   19   24  2.248E+03  0.000E+00  0.000E+00  0.000E+00  2.306E-02  0.000E+00  0.000E+00   0.0E+00
   19   25  2.060E+03  0.000E+00  0.000E+00  0.000E+00  2.573E-01  0.000E+00  0.000E+00   0.0E+00
   19   26  2.026E+03  0.000E+00  0.000E+00  0.000E+00  3.054E-01  7.778E+02  0.000E+00   0.0E+00
   19   32  1.860E+02  0.000E+00  0.000E+00  0.000E+00  1.214E+04  0.000E+00  0.000E+00   0.0E+00
   19   34  1.524E+02  0.000E+00  0.000E+00  0.000E+00  1.390E+06  0.000E+00  0.000E+00   0.0E+00
   19   39  1.373E+02  0.000E+00  0.000E+00  0.000E+00  0.000E+00  0.000E+00  3.912E+01   0.0E+00
   19   40  1.373E+02  2.944E+10  6.467E-02  2.630E-01  0.000E+00  0.000E+00  7.207E+01   9.6E-01
   19   42  1.359E+02  0.000E+00  0.000E+00  0.000E+00  0.000E+00  0.000E+00  6.256E+01   0.0E+00
   19   45  1.304E+02  0.000E+00  0.000E+00  0.000E+00  0.000E+00  0.000E+00  3.565E+01   0.0E+00
   19   47  1.283E+02  2.220E+10  4.261E-02  1.620E-01  0.000E+00  0.000E+00  1.769E+02   4.1E-01
   19   49  1.280E+02  0.000E+00  0.000E+00  0.000E+00  0.000E+00  0.000E+00  5.820E+01   0.0E+00
   19   51  1.244E+02  0.000E+00  0.000E+00  0.000E+00  0.000E+00  0.000E+00  1.280E+02   0.0E+00
   19   54  1.217E+02  0.000E+00  0.000E+00  0.000E+00  2.245E+06  5.992E+00  0.000E+00   0.0E+00
   19   55  1.216E+02  0.000E+00  0.000E+00  0.000E+00  4.081E+05  0.000E+00  0.000E+00   0.0E+00
   19   56  1.214E+02  0.000E+00  0.000E+00  0.000E+00  8.386E+05  7.274E+00  0.000E+00   0.0E+00
   19   57  1.209E+02  0.000E+00  0.000E+00  0.000E+00  1.570E+05  0.000E+00  0.000E+00   0.0E+00
   19   58  1.207E+02  0.000E+00  0.000E+00  0.000E+00  9.572E+05  1.063E+00  0.000E+00   0.0E+00
   19   60  1.162E+02  3.139E+11  7.774E-01  2.678E+00  0.000E+00  0.000E+00  4.300E+03   9.9E-01
   19   61  1.162E+02  1.062E+10  2.151E-02  7.409E-02  0.000E+00  0.000E+00  4.337E+01   9.9E-01
   19   62  1.161E+02  0.000E+00  0.000E+00  0.000E+00  7.545E+02  0.000E+00  0.000E+00   0.0E+00
   19   63  1.159E+02  1.764E+09  2.762E-03  9.485E-03  0.000E+00  0.000E+00  1.723E+01   9.7E-01
   19   64  1.158E+02  4.292E+10  8.636E-02  2.964E-01  0.000E+00  0.000E+00  1.398E+03   9.7E-01
   19   65  1.160E+02  0.000E+00  0.000E+00  0.000E+00  9.036E+03  0.000E+00  0.000E+00   0.0E+00
   19   66  1.158E+02  0.000E+00  0.000E+00  0.000E+00  9.195E+03  6.428E-01  0.000E+00   0.0E+00
   19   67  1.156E+02  0.000E+00  0.000E+00  0.000E+00  0.000E+00  0.000E+00  4.569E+00   0.0E+00
   19   68  1.156E+02  8.753E+09  1.363E-02  4.668E-02  0.000E+00  0.000E+00  1.376E+02   7.8E-01
   19   70  1.154E+02  0.000E+00  0.000E+00  0.000E+00  0.000E+00  0.000E+00  7.764E+01   0.0E+00
   19   72  1.112E+02  6.679E+06  9.637E-06  3.176E-05  0.000E+00  0.000E+00  6.174E-02   7.5E-01
   19   73  1.112E+02  1.424E+08  2.640E-04  8.697E-04  0.000E+00  0.000E+00  2.901E+00   7.7E-01
   19   74  1.109E+02  0.000E+00  0.000E+00  0.000E+00  0.000E+00  0.000E+00  2.022E-01   0.0E+00
   19   75  1.109E+02  1.146E+09  1.642E-03  5.394E-03  0.000E+00  0.000E+00  4.913E+00   6.1E-01
   19   76  8.955E+01  0.000E+00  0.000E+00  0.000E+00  6.261E+05  0.000E+00  0.000E+00   0.0E+00
   19   79  8.669E+01  0.000E+00  0.000E+00  0.000E+00  0.000E+00  0.000E+00  4.109E+01   0.0E+00
   19   80  8.667E+01  6.812E+09  5.967E-03  1.532E-02  0.000E+00  0.000E+00  1.106E+02   1.2E+00
   19   83  8.647E+01  0.000E+00  0.000E+00  0.000E+00  0.000E+00  0.000E+00  4.526E+01   0.0E+00
   19   88  8.383E+01  0.000E+00  0.000E+00  0.000E+00  0.000E+00  0.000E+00  2.507E-01   0.0E+00
   19   91  8.349E+01  0.000E+00  0.000E+00  0.000E+00  1.014E+06  6.338E+00  0.000E+00   0.0E+00
   19   92  8.346E+01  0.000E+00  0.000E+00  0.000E+00  1.386E+05  0.000E+00  0.000E+00   0.0E+00
   19   93  8.342E+01  0.000E+00  0.000E+00  0.000E+00  4.026E+05  4.910E+00  0.000E+00   0.0E+00
   19   94  8.331E+01  0.000E+00  0.000E+00  0.000E+00  7.992E+04  0.000E+00  0.000E+00   0.0E+00
   19   95  8.326E+01  0.000E+00  0.000E+00  0.000E+00  4.971E+05  1.289E+00  0.000E+00   0.0E+00
   19   99  8.217E+01  1.156E+11  1.431E-01  3.483E-01  0.000E+00  0.000E+00  3.233E+03   1.0E+00
   19  100  8.216E+01  4.176E+09  4.226E-03  1.029E-02  0.000E+00  0.000E+00  2.767E+01   9.9E-01
   19  101  8.215E+01  0.000E+00  0.000E+00  0.000E+00  0.000E+00  0.000E+00  1.364E+01   0.0E+00
   19  102  8.209E+01  1.604E+09  1.260E-03  3.065E-03  0.000E+00  0.000E+00  1.218E+02   1.1E+00
   19  103  8.208E+01  0.000E+00  0.000E+00  0.000E+00  0.000E+00  0.000E+00  1.889E+00   0.0E+00
   19  104  8.207E+01  0.000E+00  0.000E+00  0.000E+00  8.128E+03  0.000E+00  0.000E+00   0.0E+00
   19  105  8.207E+01  5.417E+08  4.255E-04  1.035E-03  0.000E+00  0.000E+00  1.984E+01   9.3E-01
   19  106  8.207E+01  0.000E+00  0.000E+00  0.000E+00  7.669E+04  1.220E-01  0.000E+00   0.0E+00
   19  107  8.206E+01  1.657E+10  1.673E-02  4.068E-02  0.000E+00  0.000E+00  1.095E+03   9.5E-01
   19  108  8.204E+01  0.000E+00  0.000E+00  0.000E+00  1.676E+06  8.625E-02  0.000E+00   0.0E+00
   19  109  8.204E+01  0.000E+00  0.000E+00  0.000E+00  3.481E+07  0.000E+00  0.000E+00   0.0E+00
   19  110  8.202E+01  0.000E+00  0.000E+00  0.000E+00  1.158E+05  1.462E-03  0.000E+00   0.0E+00
   19  111  8.201E+01  0.000E+00  0.000E+00  0.000E+00  1.083E+06  2.053E-02  0.000E+00   0.0E+00
   19  112  8.199E+01  0.000E+00  0.000E+00  0.000E+00  5.556E+05  2.060E-02  0.000E+00   0.0E+00
   19  113  8.199E+01  0.000E+00  0.000E+00  0.000E+00  6.921E+06  2.087E-02  0.000E+00   0.0E+00
   19  114  8.089E+01  0.000E+00  0.000E+00  0.000E+00  1.568E+01  0.000E+00  0.000E+00   0.0E+00
   19  115  8.087E+01  0.000E+00  0.000E+00  0.000E+00  1.366E+04  0.000E+00  0.000E+00   0.0E+00
   19  116  8.082E+01  0.000E+00  0.000E+00  0.000E+00  3.384E+03  1.239E-01  0.000E+00   0.0E+00
   19  118  7.966E+01  1.719E+06  1.272E-06  3.002E-06  0.000E+00  0.000E+00  4.361E-02   6.6E-01
   19  119  7.965E+01  4.107E+07  3.906E-05  9.218E-05  0.000E+00  0.000E+00  1.180E+00   4.7E-01
   19  120  7.963E+01  7.235E+06  5.349E-06  1.262E-05  0.000E+00  0.000E+00  5.208E+00   7.3E+00
   19  121  7.962E+01  0.000E+00  0.000E+00  0.000E+00  0.000E+00  0.000E+00  1.245E-01   0.0E+00
   19  122  7.956E+01  0.000E+00  0.000E+00  0.000E+00  7.417E+01  3.938E-03  0.000E+00   0.0E+00
   19  123  7.956E+01  0.000E+00  0.000E+00  0.000E+00  6.665E+02  1.572E-02  0.000E+00   0.0E+00
   19  124  7.955E+01  0.000E+00  0.000E+00  0.000E+00  8.824E+00  1.361E-04  0.000E+00   0.0E+00
   19  125  7.955E+01  0.000E+00  0.000E+00  0.000E+00  3.174E+02  4.392E-03  0.000E+00   0.0E+00
   20   21  1.169E+04  0.000E+00  0.000E+00  0.000E+00  3.718E-04  1.046E+01  0.000E+00   0.0E+00
   20   22  7.177E+03  0.000E+00  0.000E+00  0.000E+00  9.157E-04  3.741E+00  0.000E+00   0.0E+00
   20   23  3.099E+03  0.000E+00  0.000E+00  0.000E+00  8.316E-02  0.000E+00  0.000E+00   0.0E+00
   20   24  2.522E+03  0.000E+00  0.000E+00  0.000E+00  8.527E-02  6.085E+02  0.000E+00   0.0E+00
   20   25  2.288E+03  0.000E+00  0.000E+00  0.000E+00  5.863E-02  2.864E+01  0.000E+00   0.0E+00
   20   26  2.246E+03  0.000E+00  0.000E+00  0.000E+00  3.020E-02  1.964E+00  0.000E+00   0.0E+00
   20   27  1.123E+03  0.000E+00  0.000E+00  0.000E+00  5.813E-01  0.000E+00  0.000E+00   0.0E+00
   20   28  2.950E+02  0.000E+00  0.000E+00  0.000E+00  0.000E+00  0.000E+00  3.611E-03   0.0E+00
   20   31  1.896E+02  0.000E+00  0.000E+00  0.000E+00  5.041E+03  0.000E+00  0.000E+00   0.0E+00
   20   32  1.876E+02  0.000E+00  0.000E+00  0.000E+00  3.438E+03  7.453E-01  0.000E+00   0.0E+00
   20   33  1.831E+02  0.000E+00  0.000E+00  0.000E+00  1.023E+02  0.000E+00  0.000E+00   0.0E+00
   20   34  1.535E+02  0.000E+00  0.000E+00  0.000E+00  4.638E+05  3.652E-04  0.000E+00   0.0E+00
   20   35  1.529E+02  0.000E+00  0.000E+00  0.000E+00  9.942E+05  0.000E+00  0.000E+00   0.0E+00
   20   37  1.448E+02  0.000E+00  0.000E+00  0.000E+00  3.773E+04  0.000E+00  0.000E+00   0.0E+00
   20   38  1.390E+02  0.000E+00  0.000E+00  0.000E+00  0.000E+00  0.000E+00  3.051E+00   0.0E+00
   20   39  1.382E+02  2.678E+10  5.476E-02  1.744E-01  0.000E+00  0.000E+00  1.844E-02   9.6E-01
   20   40  1.382E+02  2.677E+09  7.663E-03  2.440E-02  0.000E+00  0.000E+00  4.103E-01   1.0E+00
   20   41  1.372E+02  0.000E+00  0.000E+00  0.000E+00  0.000E+00  0.000E+00  4.161E+00   0.0E+00
   20   42  1.368E+02  1.040E+08  2.085E-04  6.571E-04  0.000E+00  0.000E+00  5.198E-01   7.8E-01
   20   44  1.321E+02  0.000E+00  0.000E+00  0.000E+00  0.000E+00  0.000E+00  2.874E+01   0.0E+00
   20   45  1.313E+02  4.250E+09  7.842E-03  2.372E-02  0.000E+00  0.000E+00  2.772E+00   5.7E-01
   20   46  1.306E+02  0.000E+00  0.000E+00  0.000E+00  0.000E+00  0.000E+00  4.797E-02   0.0E+00
   20   47  1.291E+02  3.089E+08  7.717E-04  2.296E-03  0.000E+00  0.000E+00  3.715E+00   4.8E-01
   20   48  1.288E+02  0.000E+00  0.000E+00  0.000E+00  0.000E+00  0.000E+00  1.900E+02   0.0E+00
   20   49  1.288E+02  1.347E+10  2.394E-02  7.106E-02  0.000E+00  0.000E+00  1.017E+02   3.7E-01
   20   51  1.252E+02  7.201E+09  1.208E-02  3.485E-02  0.000E+00  0.000E+00  5.232E+01   4.4E-01
   20   53  1.228E+02  0.000E+00  0.000E+00  0.000E+00  5.450E+05  0.000E+00  0.000E+00   0.0E+00
   20   54  1.224E+02  0.000E+00  0.000E+00  0.000E+00  6.206E+05  5.826E-01  0.000E+00   0.0E+00
   20   55  1.223E+02  0.000E+00  0.000E+00  0.000E+00  6.140E+04  3.799E-01  0.000E+00   0.0E+00
   20   56  1.221E+02  0.000E+00  0.000E+00  0.000E+00  1.187E+06  1.592E+00  0.000E+00   0.0E+00
   20   57  1.216E+02  0.000E+00  0.000E+00  0.000E+00  1.563E+06  3.328E-02  0.000E+00   0.0E+00
   20   58  1.214E+02  0.000E+00  0.000E+00  0.000E+00  3.659E+05  1.094E+00  0.000E+00   0.0E+00
   20   59  1.196E+02  0.000E+00  0.000E+00  0.000E+00  2.843E+05  0.000E+00  0.000E+00   0.0E+00
   20   60  1.169E+02  0.000E+00  0.000E+00  0.000E+00  0.000E+00  0.000E+00  6.311E+02   0.0E+00
   20   61  1.169E+02  2.651E+11  6.983E-01  1.881E+00  0.000E+00  0.000E+00  2.814E+02   9.9E-01
   20   62  1.168E+02  0.000E+00  0.000E+00  0.000E+00  3.555E+03  4.902E-01  0.000E+00   0.0E+00
   20   63  1.165E+02  5.490E+10  1.118E-01  3.001E-01  0.000E+00  0.000E+00  1.639E+02   9.8E-01
   20   64  1.165E+02  1.520E+10  3.977E-02  1.068E-01  0.000E+00  0.000E+00  4.275E+02   1.0E+00
   20   65  1.166E+02  0.000E+00  0.000E+00  0.000E+00  4.441E+04  4.645E-02  0.000E+00   0.0E+00
   20   66  1.164E+02  0.000E+00  0.000E+00  0.000E+00  6.055E+04  2.123E-01  0.000E+00   0.0E+00
   20   67  1.162E+02  1.243E+10  1.799E-02  4.820E-02  0.000E+00  0.000E+00  2.537E+01   8.1E-01
   20   68  1.162E+02  5.784E+09  1.171E-02  3.137E-02  0.000E+00  0.000E+00  1.587E+02   9.9E-01
   20   69  1.161E+02  0.000E+00  0.000E+00  0.000E+00  0.000E+00  0.000E+00  8.849E+01   0.0E+00
   20   70  1.161E+02  2.791E+09  4.025E-03  1.077E-02  0.000E+00  0.000E+00  2.704E+01   8.0E-01
   20   71  1.145E+02  0.000E+00  0.000E+00  0.000E+00  5.842E+01  0.000E+00  0.000E+00   0.0E+00
   20   72  1.118E+02  1.148E+08  2.153E-04  5.549E-04  0.000E+00  0.000E+00  1.759E+00   1.3E+00
   20   73  1.118E+02  9.602E+09  2.313E-02  5.960E-02  0.000E+00  0.000E+00  1.583E+02   9.9E-01
   20   74  1.115E+02  5.815E+08  7.740E-04  1.988E-03  0.000E+00  0.000E+00  5.034E+00   4.8E-01
   20   75  1.114E+02  8.422E+08  1.568E-03  4.028E-03  0.000E+00  0.000E+00  2.931E+01   9.6E-01
   20   76  8.994E+01  0.000E+00  0.000E+00  0.000E+00  2.142E+05  3.965E-03  0.000E+00   0.0E+00
   20   77  8.980E+01  0.000E+00  0.000E+00  0.000E+00  4.591E+05  0.000E+00  0.000E+00   0.0E+00
   20   78  8.727E+01  0.000E+00  0.000E+00  0.000E+00  0.000E+00  0.000E+00  2.409E+00   0.0E+00
   20   79  8.705E+01  6.509E+09  5.282E-03  1.060E-02  0.000E+00  0.000E+00  3.989E+00   1.1E+00
   20   80  8.703E+01  8.889E+08  1.009E-03  2.024E-03  0.000E+00  0.000E+00  1.345E-01   1.1E+00
   20   81  8.691E+01  0.000E+00  0.000E+00  0.000E+00  0.000E+00  0.000E+00  1.879E-01   0.0E+00
   20   83  8.683E+01  4.956E+07  4.002E-05  8.008E-05  0.000E+00  0.000E+00  3.240E-02   9.9E-01
   20   84  8.692E+01  0.000E+00  0.000E+00  0.000E+00  1.751E+04  0.000E+00  0.000E+00   0.0E+00
   20   86  8.433E+01  0.000E+00  0.000E+00  0.000E+00  0.000E+00  0.000E+00  3.298E+00   0.0E+00
   20   87  8.422E+01  0.000E+00  0.000E+00  0.000E+00  0.000E+00  0.000E+00  1.649E+00   0.0E+00
   20   88  8.417E+01  1.115E+08  8.461E-05  1.641E-04  0.000E+00  0.000E+00  3.593E+00   2.0E+00
   20   90  8.391E+01  0.000E+00  0.000E+00  0.000E+00  2.048E+05  0.000E+00  0.000E+00   0.0E+00
   20   91  8.383E+01  0.000E+00  0.000E+00  0.000E+00  2.801E+05  5.343E-01  0.000E+00   0.0E+00
   20   92  8.379E+01  0.000E+00  0.000E+00  0.000E+00  5.203E+04  2.186E-01  0.000E+00   0.0E+00
   20   93  8.376E+01  0.000E+00  0.000E+00  0.000E+00  5.311E+05  1.679E+00  0.000E+00   0.0E+00
   20   94  8.365E+01  0.000E+00  0.000E+00  0.000E+00  7.726E+05  2.834E-01  0.000E+00   0.0E+00
   20   95  8.360E+01  0.000E+00  0.000E+00  0.000E+00  1.942E+05  5.197E-01  0.000E+00   0.0E+00
   20   97  8.308E+01  0.000E+00  0.000E+00  0.000E+00  1.299E+05  0.000E+00  0.000E+00   0.0E+00
   20   98  8.250E+01  0.000E+00  0.000E+00  0.000E+00  0.000E+00  0.000E+00  2.208E+01   0.0E+00
   20   99  8.249E+01  0.000E+00  0.000E+00  0.000E+00  0.000E+00  0.000E+00  4.773E+02   0.0E+00
   20  100  8.249E+01  9.783E+10  1.283E-01  2.439E-01  0.000E+00  0.000E+00  2.165E+02   9.9E-01
   20  101  8.248E+01  1.017E+09  7.410E-04  1.409E-03  0.000E+00  0.000E+00  3.223E+01   1.2E+00
   20  102  8.242E+01  3.514E+09  3.579E-03  6.798E-03  0.000E+00  0.000E+00  1.427E+02   9.1E-01
   20  103  8.241E+01  1.965E+09  1.429E-03  2.713E-03  0.000E+00  0.000E+00  2.555E+01   1.0E+00
   20  104  8.240E+01  0.000E+00  0.000E+00  0.000E+00  2.173E+05  1.108E-01  0.000E+00   0.0E+00
   20  105  8.240E+01  1.999E+10  2.035E-02  3.863E-02  0.000E+00  0.000E+00  1.090E+02   9.6E-01
   20  106  8.239E+01  0.000E+00  0.000E+00  0.000E+00  1.641E+05  2.354E-04  0.000E+00   0.0E+00
   20  107  8.239E+01  4.720E+09  6.176E-03  1.173E-02  0.000E+00  0.000E+00  3.067E+02   1.0E+00
   20  108  8.237E+01  0.000E+00  0.000E+00  0.000E+00  2.842E+07  0.000E+00  0.000E+00   0.0E+00
   20  110  8.234E+01  0.000E+00  0.000E+00  0.000E+00  1.766E+06  1.341E-02  0.000E+00   0.0E+00
   20  111  8.234E+01  0.000E+00  0.000E+00  0.000E+00  8.132E+05  2.290E-03  0.000E+00   0.0E+00
   20  112  8.232E+01  0.000E+00  0.000E+00  0.000E+00  8.114E+06  1.265E-02  0.000E+00   0.0E+00
   20  113  8.232E+01  0.000E+00  0.000E+00  0.000E+00  1.378E+06  0.000E+00  0.000E+00   0.0E+00
   20  114  8.121E+01  0.000E+00  0.000E+00  0.000E+00  3.172E+03  3.948E-01  0.000E+00   0.0E+00
   20  115  8.119E+01  0.000E+00  0.000E+00  0.000E+00  1.104E+04  2.952E-02  0.000E+00   0.0E+00
   20  116  8.114E+01  0.000E+00  0.000E+00  0.000E+00  3.588E+04  2.322E-01  0.000E+00   0.0E+00
   20  117  8.073E+01  0.000E+00  0.000E+00  0.000E+00  8.778E+03  0.000E+00  0.000E+00   0.0E+00
   20  118  7.997E+01  7.349E+07  7.045E-05  1.298E-04  0.000E+00  0.000E+00  8.634E-01   1.5E+00
   20  119  7.996E+01  3.924E+09  4.836E-03  8.910E-03  0.000E+00  0.000E+00  1.296E+02   1.0E+00
   20  120  7.994E+01  3.405E+08  3.262E-04  6.010E-04  0.000E+00  0.000E+00  2.673E+01   1.1E+00
   20  121  7.993E+01  7.996E+06  5.471E-06  1.008E-05  0.000E+00  0.000E+00  1.910E+00   7.4E-02
   20  122  7.987E+01  0.000E+00  0.000E+00  0.000E+00  1.500E+04  1.835E-02  0.000E+00   0.0E+00
   20  123  7.986E+01  0.000E+00  0.000E+00  0.000E+00  1.482E+05  7.012E-03  0.000E+00   0.0E+00
   20  124  7.986E+01  0.000E+00  0.000E+00  0.000E+00  6.004E+04  2.279E-04  0.000E+00   0.0E+00
   20  125  7.986E+01  0.000E+00  0.000E+00  0.000E+00  1.189E+06  0.000E+00  0.000E+00   0.0E+00
   21   22  1.859E+04  0.000E+00  0.000E+00  0.000E+00  8.465E-07  6.498E-01  0.000E+00   0.0E+00
   21   23  4.216E+03  0.000E+00  0.000E+00  0.000E+00  7.383E-02  9.233E+01  0.000E+00   0.0E+00
   21   24  3.216E+03  0.000E+00  0.000E+00  0.000E+00  1.588E-03  1.881E+02  0.000E+00   0.0E+00
   21   25  2.845E+03  0.000E+00  0.000E+00  0.000E+00  5.199E-02  2.943E+01  0.000E+00   0.0E+00
   21   26  2.780E+03  0.000E+00  0.000E+00  0.000E+00  8.738E-04  1.920E+01  0.000E+00   0.0E+00
   21   27  1.242E+03  0.000E+00  0.000E+00  0.000E+00  3.548E+00  3.367E+02  0.000E+00   0.0E+00
   21   28  3.026E+02  9.921E+03  8.172E-08  4.070E-07  0.000E+00  0.000E+00  1.074E-02   3.2E-01
   21   29  2.718E+02  0.000E+00  0.000E+00  0.000E+00  0.000E+00  0.000E+00  8.234E-03   0.0E+00
   21   30  1.933E+02  0.000E+00  0.000E+00  0.000E+00  1.960E+03  0.000E+00  0.000E+00   0.0E+00
   21   31  1.927E+02  0.000E+00  0.000E+00  0.000E+00  2.585E+03  4.074E+00  0.000E+00   0.0E+00
   21   32  1.907E+02  0.000E+00  0.000E+00  0.000E+00  1.075E+03  3.860E-01  0.000E+00   0.0E+00
   21   33  1.861E+02  0.000E+00  0.000E+00  0.000E+00  2.458E+02  4.725E+00  0.000E+00   0.0E+00
   21   34  1.556E+02  0.000E+00  0.000E+00  0.000E+00  1.917E+05  2.432E-03  0.000E+00   0.0E+00
   21   35  1.549E+02  0.000E+00  0.000E+00  0.000E+00  7.914E+05  1.217E-01  0.000E+00   0.0E+00
   21   36  1.470E+02  0.000E+00  0.000E+00  0.000E+00  2.237E+05  0.000E+00  0.000E+00   0.0E+00
   21   37  1.467E+02  0.000E+00  0.000E+00  0.000E+00  3.628E+04  1.066E-01  0.000E+00   0.0E+00
   21   38  1.407E+02  4.246E+08  7.557E-04  1.750E-03  0.000E+00  0.000E+00  6.379E+00   9.9E-01
   21   39  1.398E+02  4.714E+09  1.382E-02  3.181E-02  0.000E+00  0.000E+00  4.004E+00   1.1E+00
   21   40  1.398E+02  1.585E+08  6.506E-04  1.497E-03  0.000E+00  0.000E+00  6.086E-01   1.2E+00
   21   41  1.389E+02  2.024E+10  3.510E-02  8.023E-02  0.000E+00  0.000E+00  8.024E-01   9.8E-01
   21   42  1.384E+02  9.729E+07  2.794E-04  6.365E-04  0.000E+00  0.000E+00  1.045E+01   8.1E-01
   21   43  1.352E+02  0.000E+00  0.000E+00  0.000E+00  0.000E+00  0.000E+00  2.271E+01   0.0E+00
   21   44  1.336E+02  8.426E+09  1.353E-02  2.977E-02  0.000E+00  0.000E+00  9.035E+00   6.2E-01
   21   45  1.328E+02  1.568E+08  4.142E-04  9.050E-04  0.000E+00  0.000E+00  1.023E+01   7.7E-01
   21   46  1.321E+02  1.656E+08  2.600E-04  5.654E-04  0.000E+00  0.000E+00  1.599E+00   5.2E-01
   21   47  1.305E+02  8.268E+07  2.957E-04  6.354E-04  0.000E+00  0.000E+00  1.465E+01   2.9E-01
   21   48  1.302E+02  1.014E+10  1.548E-02  3.318E-02  0.000E+00  0.000E+00  1.708E+01   3.2E-01
   21   49  1.303E+02  6.068E+07  1.543E-04  3.309E-04  0.000E+00  0.000E+00  7.730E+01   4.8E-01
   21   50  1.271E+02  0.000E+00  0.000E+00  0.000E+00  0.000E+00  0.000E+00  1.707E+00   0.0E+00
   21   51  1.265E+02  2.602E+09  6.245E-03  1.301E-02  0.000E+00  0.000E+00  5.534E+01   2.9E-01
   21   52  1.244E+02  0.000E+00  0.000E+00  0.000E+00  1.032E+06  0.000E+00  0.000E+00   0.0E+00
   21   53  1.241E+02  0.000E+00  0.000E+00  0.000E+00  6.688E+04  3.645E+00  0.000E+00   0.0E+00
   21   54  1.237E+02  0.000E+00  0.000E+00  0.000E+00  8.429E+04  0.000E+00  0.000E+00   0.0E+00
   21   55  1.236E+02  0.000E+00  0.000E+00  0.000E+00  3.268E+05  1.896E+00  0.000E+00   0.0E+00
   21   56  1.234E+02  0.000E+00  0.000E+00  0.000E+00  1.057E+06  1.296E-01  0.000E+00   0.0E+00
   21   57  1.229E+02  0.000E+00  0.000E+00  0.000E+00  3.708E+05  1.398E-02  0.000E+00   0.0E+00
   21   58  1.226E+02  0.000E+00  0.000E+00  0.000E+00  2.173E+04  3.456E-01  0.000E+00   0.0E+00
   21   59  1.208E+02  0.000E+00  0.000E+00  0.000E+00  1.745E+06  3.008E-01  0.000E+00   0.0E+00
   21   61  1.181E+02  0.000E+00  0.000E+00  0.000E+00  0.000E+00  0.000E+00  2.672E+02   0.0E+00
   21   62  1.179E+02  0.000E+00  0.000E+00  0.000E+00  1.659E+05  4.913E-02  0.000E+00   0.0E+00
   21   63  1.177E+02  2.365E+11  6.878E-01  1.333E+00  0.000E+00  0.000E+00  7.230E+01   9.9E-01
   21   64  1.177E+02  0.000E+00  0.000E+00  0.000E+00  0.000E+00  0.000E+00  9.805E+02   0.0E+00
   21   65  1.178E+02  0.000E+00  0.000E+00  0.000E+00  6.979E+04  5.273E-02  0.000E+00   0.0E+00
   21   66  1.176E+02  0.000E+00  0.000E+00  0.000E+00  1.887E+04  1.571E-01  0.000E+00   0.0E+00
   21   67  1.174E+02  7.327E+10  1.514E-01  2.927E-01  0.000E+00  0.000E+00  2.309E+02   9.4E-01
   21   68  1.174E+02  5.488E+09  1.587E-02  3.067E-02  0.000E+00  0.000E+00  8.276E+00   9.5E-01
   21   69  1.172E+02  1.614E+10  1.996E-02  3.852E-02  0.000E+00  0.000E+00  2.247E+02   7.8E-01
   21   70  1.172E+02  5.497E+08  1.133E-03  2.186E-03  0.000E+00  0.000E+00  3.826E+01   7.0E-01
   21   71  1.156E+02  0.000E+00  0.000E+00  0.000E+00  2.081E+04  1.910E+00  0.000E+00   0.0E+00
   21   72  1.129E+02  2.017E+10  5.397E-02  1.003E-01  0.000E+00  0.000E+00  4.191E+01   1.0E+00
   21   73  1.129E+02  0.000E+00  0.000E+00  0.000E+00  0.000E+00  0.000E+00  6.584E+01   0.0E+00
   21   74  1.126E+02  9.204E+08  1.748E-03  3.239E-03  0.000E+00  0.000E+00  3.817E+01   1.2E+00
   21   75  1.125E+02  1.070E+07  2.845E-05  5.269E-05  0.000E+00  0.000E+00  2.913E-01   1.7E+00
   21   76  9.064E+01  0.000E+00  0.000E+00  0.000E+00  9.203E+04  1.817E-04  0.000E+00   0.0E+00
   21   77  9.050E+01  0.000E+00  0.000E+00  0.000E+00  3.805E+05  7.047E-02  0.000E+00   0.0E+00
   21   78  8.793E+01  1.228E+08  8.544E-05  1.237E-04  0.000E+00  0.000E+00  6.864E+00   1.1E+00
   21   79  8.771E+01  2.243E+09  2.587E-03  3.734E-03  0.000E+00  0.000E+00  2.604E-03   1.0E+00
   21   80  8.768E+01  9.389E+07  1.515E-04  2.187E-04  0.000E+00  0.000E+00  2.413E+00   1.0E+00
   21   81  8.756E+01  5.857E+09  4.039E-03  5.822E-03  0.000E+00  0.000E+00  2.622E+00   1.1E+00
   21   82  8.764E+01  0.000E+00  0.000E+00  0.000E+00  9.338E+04  0.000E+00  0.000E+00   0.0E+00
   21   83  8.748E+01  3.982E+05  4.569E-07  6.579E-07  0.000E+00  0.000E+00  8.540E+00   3.7E+00
   21   84  8.757E+01  0.000E+00  0.000E+00  0.000E+00  1.934E+04  2.655E-02  0.000E+00   0.0E+00
   21   85  8.661E+01  0.000E+00  0.000E+00  0.000E+00  0.000E+00  0.000E+00  2.359E+01   0.0E+00
   21   86  8.494E+01  3.684E+08  2.391E-04  3.343E-04  0.000E+00  0.000E+00  1.096E-02   1.6E+00
   21   87  8.483E+01  3.287E+07  2.128E-05  2.971E-05  0.000E+00  0.000E+00  3.510E-01   1.7E+00
   21   88  8.478E+01  2.909E+07  3.135E-05  4.376E-05  0.000E+00  0.000E+00  1.780E-01   1.6E+00
   21   89  8.460E+01  0.000E+00  0.000E+00  0.000E+00  3.615E+05  0.000E+00  0.000E+00   0.0E+00
   21   90  8.452E+01  0.000E+00  0.000E+00  0.000E+00  7.455E+04  2.431E+00  0.000E+00   0.0E+00
   21   91  8.444E+01  0.000E+00  0.000E+00  0.000E+00  3.800E+04  0.000E+00  0.000E+00   0.0E+00
   21   92  8.440E+01  0.000E+00  0.000E+00  0.000E+00  1.760E+05  1.272E+00  0.000E+00   0.0E+00
   21   93  8.436E+01  0.000E+00  0.000E+00  0.000E+00  4.621E+05  1.233E-04  0.000E+00   0.0E+00
   21   94  8.425E+01  0.000E+00  0.000E+00  0.000E+00  1.552E+05  3.128E-01  0.000E+00   0.0E+00
   21   95  8.420E+01  0.000E+00  0.000E+00  0.000E+00  9.293E+03  1.097E-01  0.000E+00   0.0E+00
   21   96  8.404E+01  0.000E+00  0.000E+00  0.000E+00  0.000E+00  0.000E+00  1.168E-02   0.0E+00
   21   97  8.368E+01  0.000E+00  0.000E+00  0.000E+00  8.857E+05  4.935E-01  0.000E+00   0.0E+00
   21   98  8.308E+01  2.821E+09  1.752E-03  2.395E-03  0.000E+00  0.000E+00  1.289E+02   1.1E+00
   21  100  8.307E+01  0.000E+00  0.000E+00  0.000E+00  0.000E+00  0.000E+00  1.889E+02   0.0E+00
   21  101  8.306E+01  6.036E+08  6.243E-04  8.536E-04  0.000E+00  0.000E+00  2.930E+00   8.2E-01
   21  102  8.300E+01  5.884E+08  8.509E-04  1.163E-03  0.000E+00  0.000E+00  5.894E+00   9.0E-01
   21  103  8.299E+01  2.527E+10  2.609E-02  3.564E-02  0.000E+00  0.000E+00  2.437E+02   9.4E-01
   21  104  8.298E+01  0.000E+00  0.000E+00  0.000E+00  1.413E+06  4.088E-03  0.000E+00   0.0E+00
   21  105  8.298E+01  8.778E+10  1.269E-01  1.733E-01  0.000E+00  0.000E+00  4.761E+01   9.9E-01
   21  106  8.298E+01  0.000E+00  0.000E+00  0.000E+00  2.313E+05  2.262E-03  0.000E+00   0.0E+00
   21  107  8.297E+01  0.000E+00  0.000E+00  0.000E+00  0.000E+00  0.000E+00  7.534E+02   0.0E+00
   21  110  8.293E+01  0.000E+00  0.000E+00  0.000E+00  8.606E+06  6.491E-03  0.000E+00   0.0E+00
   21  111  8.292E+01  0.000E+00  0.000E+00  0.000E+00  5.534E+05  0.000E+00  0.000E+00   0.0E+00
   21  112  8.290E+01  0.000E+00  0.000E+00  0.000E+00  2.336E+07  0.000E+00  0.000E+00   0.0E+00
   21  114  8.178E+01  0.000E+00  0.000E+00  0.000E+00  7.929E+04  1.009E-03  0.000E+00   0.0E+00
   21  115  8.176E+01  0.000E+00  0.000E+00  0.000E+00  2.814E+04  2.099E-02  0.000E+00   0.0E+00
   21  116  8.170E+01  0.000E+00  0.000E+00  0.000E+00  1.014E+04  7.572E-02  0.000E+00   0.0E+00
   21  117  8.130E+01  0.000E+00  0.000E+00  0.000E+00  8.521E+02  5.687E-01  0.000E+00   0.0E+00
   21  118  8.052E+01  8.601E+09  1.170E-02  1.551E-02  0.000E+00  0.000E+00  3.365E+01   1.0E+00
   21  119  8.051E+01  0.000E+00  0.000E+00  0.000E+00  0.000E+00  0.000E+00  5.790E+01   0.0E+00
   21  120  8.049E+01  4.779E+07  6.499E-05  8.610E-05  0.000E+00  0.000E+00  1.230E-02   1.1E+00
   21  121  8.048E+01  8.187E+08  7.950E-04  1.053E-03  0.000E+00  0.000E+00  2.278E+01   1.1E+00
   21  122  8.042E+01  0.000E+00  0.000E+00  0.000E+00  3.416E+05  3.864E-02  0.000E+00   0.0E+00
   21  123  8.041E+01  0.000E+00  0.000E+00  0.000E+00  2.951E+02  0.000E+00  0.000E+00   0.0E+00
   21  124  8.041E+01  0.000E+00  0.000E+00  0.000E+00  2.743E+06  0.000E+00  0.000E+00   0.0E+00
   22   23  5.453E+03  0.000E+00  0.000E+00  0.000E+00  4.459E-04  0.000E+00  0.000E+00   0.0E+00
   22   24  3.888E+03  0.000E+00  0.000E+00  0.000E+00  1.962E-03  1.201E+01  0.000E+00   0.0E+00
   22   25  3.359E+03  0.000E+00  0.000E+00  0.000E+00  6.550E-02  1.956E+02  0.000E+00   0.0E+00
   22   26  3.269E+03  0.000E+00  0.000E+00  0.000E+00  3.003E-05  2.056E+02  0.000E+00   0.0E+00
   22   27  1.331E+03  0.000E+00  0.000E+00  0.000E+00  8.475E-02  0.000E+00  0.000E+00   0.0E+00
   22   28  3.076E+02  0.000E+00  0.000E+00  0.000E+00  0.000E+00  0.000E+00  4.064E-02   0.0E+00
   22   31  1.947E+02  0.000E+00  0.000E+00  0.000E+00  5.822E+02  0.000E+00  0.000E+00   0.0E+00
   22   32  1.927E+02  0.000E+00  0.000E+00  0.000E+00  2.395E+03  8.233E+00  0.000E+00   0.0E+00
   22   33  1.879E+02  0.000E+00  0.000E+00  0.000E+00  6.302E+02  0.000E+00  0.000E+00   0.0E+00
   22   34  1.569E+02  0.000E+00  0.000E+00  0.000E+00  5.122E+05  8.741E-03  0.000E+00   0.0E+00
   22   35  1.562E+02  0.000E+00  0.000E+00  0.000E+00  8.018E+05  0.000E+00  0.000E+00   0.0E+00
   22   37  1.478E+02  0.000E+00  0.000E+00  0.000E+00  6.401E+04  0.000E+00  0.000E+00   0.0E+00
   22   38  1.417E+02  0.000E+00  0.000E+00  0.000E+00  0.000E+00  0.000E+00  6.623E+00   0.0E+00
   22   39  1.409E+02  4.106E+08  8.729E-04  2.834E-03  0.000E+00  0.000E+00  1.625E+01   1.0E+00
   22   40  1.409E+02  1.690E+09  5.031E-03  1.633E-02  0.000E+00  0.000E+00  9.301E+01   1.2E+00
   22   41  1.399E+02  0.000E+00  0.000E+00  0.000E+00  0.000E+00  0.000E+00  1.138E+02   0.0E+00
   22   42  1.394E+02  2.041E+10  4.249E-02  1.365E-01  0.000E+00  0.000E+00  3.590E+01   9.9E-01
   22   44  1.346E+02  0.000E+00  0.000E+00  0.000E+00  0.000E+00  0.000E+00  1.355E-02   0.0E+00
   22   45  1.337E+02  2.933E+09  5.615E-03  1.730E-02  0.000E+00  0.000E+00  9.746E+00   5.7E-01
   22   46  1.331E+02  0.000E+00  0.000E+00  0.000E+00  0.000E+00  0.000E+00  1.389E+00   0.0E+00
   22   47  1.315E+02  4.075E+09  1.056E-02  3.199E-02  0.000E+00  0.000E+00  2.293E+02   3.7E-01
   22   48  1.312E+02  0.000E+00  0.000E+00  0.000E+00  0.000E+00  0.000E+00  3.172E-03   0.0E+00
   22   49  1.312E+02  1.124E+09  2.072E-03  6.262E-03  0.000E+00  0.000E+00  4.479E+00   2.8E-01
   22   51  1.274E+02  1.104E+10  1.919E-02  5.634E-02  0.000E+00  0.000E+00  9.389E+00   4.2E-01
   22   53  1.249E+02  0.000E+00  0.000E+00  0.000E+00  8.591E+05  0.000E+00  0.000E+00   0.0E+00
   22   54  1.245E+02  0.000E+00  0.000E+00  0.000E+00  7.074E+05  4.939E-01  0.000E+00   0.0E+00
   22   55  1.244E+02  0.000E+00  0.000E+00  0.000E+00  1.515E+06  1.595E+00  0.000E+00   0.0E+00
   22   56  1.242E+02  0.000E+00  0.000E+00  0.000E+00  3.663E+05  2.902E-01  0.000E+00   0.0E+00
   22   57  1.237E+02  0.000E+00  0.000E+00  0.000E+00  4.738E+04  5.022E+00  0.000E+00   0.0E+00
   22   58  1.234E+02  0.000E+00  0.000E+00  0.000E+00  9.757E+05  3.384E+00  0.000E+00   0.0E+00
   22   59  1.216E+02  0.000E+00  0.000E+00  0.000E+00  1.379E+04  0.000E+00  0.000E+00   0.0E+00
   22   60  1.188E+02  0.000E+00  0.000E+00  0.000E+00  0.000E+00  0.000E+00  9.003E+02   0.0E+00
   22   61  1.188E+02  3.110E+10  8.467E-02  2.319E-01  0.000E+00  0.000E+00  8.995E+01   9.9E-01
   22   62  1.187E+02  0.000E+00  0.000E+00  0.000E+00  2.200E+04  5.671E-02  0.000E+00   0.0E+00
   22   63  1.184E+02  1.045E+09  2.199E-03  6.001E-03  0.000E+00  0.000E+00  1.689E+02   1.0E+00
   22   64  1.184E+02  2.489E+11  6.730E-01  1.837E+00  0.000E+00  0.000E+00  2.093E+03   9.9E-01
   22   65  1.186E+02  0.000E+00  0.000E+00  0.000E+00  9.042E+04  4.667E-01  0.000E+00   0.0E+00
   22   66  1.184E+02  0.000E+00  0.000E+00  0.000E+00  5.422E+04  2.818E-01  0.000E+00   0.0E+00
   22   67  1.182E+02  8.705E+08  1.302E-03  3.545E-03  0.000E+00  0.000E+00  5.800E+01   1.3E+00
   22   68  1.181E+02  7.415E+10  1.551E-01  4.223E-01  0.000E+00  0.000E+00  1.455E+03   9.3E-01
   22   69  1.180E+02  0.000E+00  0.000E+00  0.000E+00  0.000E+00  0.000E+00  3.359E-01   0.0E+00
   22   70  1.180E+02  1.331E+10  1.984E-02  5.393E-02  0.000E+00  0.000E+00  4.282E+02   7.8E-01
   22   71  1.163E+02  0.000E+00  0.000E+00  0.000E+00  5.288E+04  0.000E+00  0.000E+00   0.0E+00
   22   72  1.136E+02  2.159E+08  4.177E-04  1.093E-03  0.000E+00  0.000E+00  4.821E-02   9.4E-01
   22   73  1.136E+02  2.437E+09  6.060E-03  1.586E-02  0.000E+00  0.000E+00  4.872E+01   1.0E+00
   22   74  1.132E+02  1.125E+08  1.545E-04  4.032E-04  0.000E+00  0.000E+00  1.893E-02   6.8E-01
   22   75  1.132E+02  7.445E+06  1.431E-05  3.732E-05  0.000E+00  0.000E+00  3.335E+01   9.9E-01
   22   76  9.108E+01  0.000E+00  0.000E+00  0.000E+00  2.493E+05  5.120E-03  0.000E+00   0.0E+00
   22   77  9.094E+01  0.000E+00  0.000E+00  0.000E+00  4.023E+05  0.000E+00  0.000E+00   0.0E+00
   22   78  8.835E+01  0.000E+00  0.000E+00  0.000E+00  0.000E+00  0.000E+00  7.275E+00   0.0E+00
   22   79  8.812E+01  1.478E+08  1.229E-04  2.495E-04  0.000E+00  0.000E+00  1.428E+01   8.4E-01
   22   80  8.810E+01  1.375E+09  1.600E-03  3.247E-03  0.000E+00  0.000E+00  4.757E+01   9.6E-01
   22   81  8.797E+01  0.000E+00  0.000E+00  0.000E+00  0.000E+00  0.000E+00  1.102E+02   0.0E+00
   22   83  8.790E+01  7.127E+09  5.897E-03  1.194E-02  0.000E+00  0.000E+00  2.801E+01   1.0E+00
   22   84  8.798E+01  0.000E+00  0.000E+00  0.000E+00  2.503E+04  0.000E+00  0.000E+00   0.0E+00
   22   86  8.533E+01  0.000E+00  0.000E+00  0.000E+00  0.000E+00  0.000E+00  2.937E-01   0.0E+00
   22   87  8.522E+01  0.000E+00  0.000E+00  0.000E+00  0.000E+00  0.000E+00  9.847E-01   0.0E+00
   22   88  8.517E+01  6.612E+07  5.136E-05  1.008E-04  0.000E+00  0.000E+00  8.855E-01   1.4E+00
   22   90  8.490E+01  0.000E+00  0.000E+00  0.000E+00  3.750E+05  0.000E+00  0.000E+00   0.0E+00
   22   91  8.482E+01  0.000E+00  0.000E+00  0.000E+00  3.194E+05  6.340E-01  0.000E+00   0.0E+00
   22   92  8.478E+01  0.000E+00  0.000E+00  0.000E+00  7.645E+05  8.100E-01  0.000E+00   0.0E+00
   22   93  8.475E+01  0.000E+00  0.000E+00  0.000E+00  1.792E+05  4.294E-01  0.000E+00   0.0E+00
   22   94  8.464E+01  0.000E+00  0.000E+00  0.000E+00  3.116E+04  4.564E+00  0.000E+00   0.0E+00
   22   95  8.458E+01  0.000E+00  0.000E+00  0.000E+00  4.641E+05  4.262E+00  0.000E+00   0.0E+00
   22   97  8.406E+01  0.000E+00  0.000E+00  0.000E+00  1.051E+04  0.000E+00  0.000E+00   0.0E+00
   22   98  8.346E+01  0.000E+00  0.000E+00  0.000E+00  0.000E+00  0.000E+00  1.081E-03   0.0E+00
   22   99  8.345E+01  0.000E+00  0.000E+00  0.000E+00  0.000E+00  0.000E+00  6.726E+02   0.0E+00
   22  100  8.345E+01  1.032E+10  1.385E-02  2.664E-02  0.000E+00  0.000E+00  5.811E+01   9.9E-01
   22  101  8.344E+01  2.876E+09  2.144E-03  4.122E-03  0.000E+00  0.000E+00  2.047E+02   1.0E+00
   22  102  8.338E+01  2.586E+10  2.695E-02  5.179E-02  0.000E+00  0.000E+00  1.184E+03   9.4E-01
   22  103  8.336E+01  2.590E+08  1.927E-04  3.703E-04  0.000E+00  0.000E+00  8.667E+01   8.0E-01
   22  104  8.336E+01  0.000E+00  0.000E+00  0.000E+00  2.331E+05  8.333E-04  0.000E+00   0.0E+00
   22  105  8.336E+01  6.161E+07  6.418E-05  1.233E-04  0.000E+00  0.000E+00  1.898E+02   1.3E+00
   22  106  8.335E+01  0.000E+00  0.000E+00  0.000E+00  1.550E+06  1.780E-02  0.000E+00   0.0E+00
   22  107  8.335E+01  9.270E+10  1.241E-01  2.384E-01  0.000E+00  0.000E+00  1.580E+03   9.9E-01
   22  108  8.332E+01  0.000E+00  0.000E+00  0.000E+00  4.115E+06  0.000E+00  0.000E+00   0.0E+00
   22  110  8.330E+01  0.000E+00  0.000E+00  0.000E+00  6.053E+05  3.371E-02  0.000E+00   0.0E+00
   22  111  8.329E+01  0.000E+00  0.000E+00  0.000E+00  9.518E+06  6.043E-03  0.000E+00   0.0E+00
   22  112  8.328E+01  0.000E+00  0.000E+00  0.000E+00  6.253E+04  6.045E-02  0.000E+00   0.0E+00
   22  113  8.327E+01  0.000E+00  0.000E+00  0.000E+00  2.549E+07  0.000E+00  0.000E+00   0.0E+00
   22  114  8.214E+01  0.000E+00  0.000E+00  0.000E+00  1.077E+04  1.513E-05  0.000E+00   0.0E+00
   22  115  8.212E+01  0.000E+00  0.000E+00  0.000E+00  2.276E+04  2.055E-01  0.000E+00   0.0E+00
   22  116  8.206E+01  0.000E+00  0.000E+00  0.000E+00  2.250E+04  5.105E-02  0.000E+00   0.0E+00
   22  117  8.165E+01  0.000E+00  0.000E+00  0.000E+00  9.958E+03  0.000E+00  0.000E+00   0.0E+00
   22  118  8.087E+01  9.929E+07  9.734E-05  1.814E-04  0.000E+00  0.000E+00  1.457E-02   8.9E-01
   22  119  8.086E+01  1.256E+09  1.583E-03  2.950E-03  0.000E+00  0.000E+00  4.680E+01   1.0E+00
   22  120  8.084E+01  1.167E+08  1.143E-04  2.130E-04  0.000E+00  0.000E+00  2.798E+01   1.3E+00
   22  121  8.083E+01  1.036E+07  7.251E-06  1.351E-05  0.000E+00  0.000E+00  7.605E-03   2.0E+00
   22  122  8.077E+01  0.000E+00  0.000E+00  0.000E+00  1.244E+04  5.786E-04  0.000E+00   0.0E+00
   22  123  8.076E+01  0.000E+00  0.000E+00  0.000E+00  8.844E+04  1.292E-02  0.000E+00   0.0E+00
   22  124  8.076E+01  0.000E+00  0.000E+00  0.000E+00  2.975E+04  4.081E-03  0.000E+00   0.0E+00
   22  125  8.076E+01  0.000E+00  0.000E+00  0.000E+00  4.855E+05  0.000E+00  0.000E+00   0.0E+00
   23   24  1.355E+04  0.000E+00  0.000E+00  0.000E+00  3.043E-06  1.461E+00  0.000E+00   0.0E+00
   23   25  8.746E+03  0.000E+00  0.000E+00  0.000E+00  1.589E-04  1.972E+01  0.000E+00   0.0E+00
   23   26  8.160E+03  0.000E+00  0.000E+00  0.000E+00  5.228E-05  0.000E+00  0.000E+00   0.0E+00
   23   27  1.761E+03  0.000E+00  0.000E+00  0.000E+00  7.474E-04  1.518E+02  0.000E+00   0.0E+00
   23   28  3.260E+02  1.891E+05  3.013E-06  9.701E-06  0.000E+00  0.000E+00  2.849E-02   3.1E-02
   23   29  2.906E+02  6.811E+07  2.874E-04  8.247E-04  0.000E+00  0.000E+00  0.000E+00   2.2E+00
   23   30  2.026E+02  0.000E+00  0.000E+00  0.000E+00  0.000E+00  5.598E+00  0.000E+00   0.0E+00
   23   31  2.019E+02  0.000E+00  0.000E+00  0.000E+00  1.248E+03  1.055E+01  0.000E+00   0.0E+00
   23   32  1.997E+02  0.000E+00  0.000E+00  0.000E+00  1.566E+02  3.983E+00  0.000E+00   0.0E+00
   23   33  1.946E+02  0.000E+00  0.000E+00  0.000E+00  1.474E+01  2.709E+00  0.000E+00   0.0E+00
   23   34  1.615E+02  0.000E+00  0.000E+00  0.000E+00  3.990E+04  3.535E-02  0.000E+00   0.0E+00
   23   35  1.608E+02  0.000E+00  0.000E+00  0.000E+00  4.622E+05  4.166E-02  0.000E+00   0.0E+00
   23   36  1.524E+02  0.000E+00  0.000E+00  0.000E+00  0.000E+00  5.066E-02  0.000E+00   0.0E+00
   23   37  1.519E+02  0.000E+00  0.000E+00  0.000E+00  1.813E+05  1.928E-01  0.000E+00   0.0E+00
   23   38  1.455E+02  1.094E+08  3.472E-04  4.990E-04  0.000E+00  0.000E+00  3.406E+01   1.2E+00
   23   39  1.446E+02  1.921E+08  1.004E-03  1.434E-03  0.000E+00  0.000E+00  1.498E-02   1.3E+00
   23   40  1.446E+02  0.000E+00  0.000E+00  0.000E+00  0.000E+00  0.000E+00  8.114E-01   0.0E+00
   23   41  1.436E+02  5.021E+09  1.552E-02  2.201E-02  0.000E+00  0.000E+00  5.234E+00   9.7E-01
   23   42  1.431E+02  2.634E+07  1.348E-04  1.905E-04  0.000E+00  0.000E+00  9.353E+00   1.1E+00
   23   43  1.396E+02  2.402E+10  2.341E-02  3.229E-02  0.000E+00  0.000E+00  0.000E+00   1.0E+00
   23   44  1.380E+02  5.033E+08  1.437E-03  1.959E-03  0.000E+00  0.000E+00  3.369E-01   7.7E-02
   23   45  1.371E+02  6.339E+07  2.976E-04  4.029E-04  0.000E+00  0.000E+00  7.949E-02   1.1E-02
   23   46  1.364E+02  1.473E+09  4.108E-03  5.534E-03  0.000E+00  0.000E+00  7.763E-01   1.1E+00
   23   47  1.347E+02  0.000E+00  0.000E+00  0.000E+00  0.000E+00  0.000E+00  2.605E+00   0.0E+00
   23   48  1.344E+02  6.216E+09  1.684E-02  2.235E-02  0.000E+00  0.000E+00  6.027E-02   4.7E-01
   23   49  1.344E+02  1.581E+09  7.136E-03  9.473E-03  0.000E+00  0.000E+00  1.381E+00   3.8E-01
   23   50  1.311E+02  2.703E+08  2.320E-04  3.004E-04  0.000E+00  0.000E+00  0.000E+00   2.3E+00
   23   51  1.304E+02  1.190E+09  5.061E-03  6.520E-03  0.000E+00  0.000E+00  3.306E+01   1.6E+00
   23   52  1.282E+02  0.000E+00  0.000E+00  0.000E+00  0.000E+00  4.658E+00  0.000E+00   0.0E+00
   23   53  1.279E+02  0.000E+00  0.000E+00  0.000E+00  3.513E+05  8.111E-01  0.000E+00   0.0E+00
   23   55  1.273E+02  0.000E+00  0.000E+00  0.000E+00  1.202E+05  8.604E-02  0.000E+00   0.0E+00
   23   56  1.271E+02  0.000E+00  0.000E+00  0.000E+00  1.230E+05  0.000E+00  0.000E+00   0.0E+00
   23   57  1.266E+02  0.000E+00  0.000E+00  0.000E+00  8.822E+05  8.613E-03  0.000E+00   0.0E+00
   23   58  1.263E+02  0.000E+00  0.000E+00  0.000E+00  1.881E+03  0.000E+00  0.000E+00   0.0E+00
   23   59  1.244E+02  0.000E+00  0.000E+00  0.000E+00  8.974E+05  3.961E-01  0.000E+00   0.0E+00
   23   62  1.213E+02  0.000E+00  0.000E+00  0.000E+00  1.162E+05  1.143E+00  0.000E+00   0.0E+00
   23   63  1.211E+02  0.000E+00  0.000E+00  0.000E+00  0.000E+00  0.000E+00  2.441E+02   0.0E+00
   23   65  1.212E+02  0.000E+00  0.000E+00  0.000E+00  1.570E+05  8.973E-01  0.000E+00   0.0E+00
   23   66  1.210E+02  0.000E+00  0.000E+00  0.000E+00  4.013E+04  0.000E+00  0.000E+00   0.0E+00
   23   67  1.208E+02  1.237E+11  4.510E-01  5.380E-01  0.000E+00  0.000E+00  4.417E+01   9.9E-01
   23   68  1.208E+02  0.000E+00  0.000E+00  0.000E+00  0.000E+00  0.000E+00  7.941E+02   0.0E+00
   23   69  1.206E+02  2.404E+10  5.241E-02  6.242E-02  0.000E+00  0.000E+00  1.057E+02   8.5E-01
   23   70  1.206E+02  4.515E+10  1.640E-01  1.953E-01  0.000E+00  0.000E+00  3.199E+02   9.1E-01
   23   71  1.189E+02  0.000E+00  0.000E+00  0.000E+00  1.123E+05  6.725E-01  0.000E+00   0.0E+00
   23   72  1.160E+02  0.000E+00  0.000E+00  0.000E+00  0.000E+00  0.000E+00  3.820E+01   0.0E+00
   23   74  1.157E+02  8.576E+10  2.866E-01  3.274E-01  0.000E+00  0.000E+00  1.546E+02   9.9E-01
   23   75  1.156E+02  0.000E+00  0.000E+00  0.000E+00  0.000E+00  0.000E+00  1.490E+02   0.0E+00
   23   76  9.263E+01  0.000E+00  0.000E+00  0.000E+00  2.125E+04  1.700E-02  0.000E+00   0.0E+00
   23   77  9.248E+01  0.000E+00  0.000E+00  0.000E+00  2.476E+05  5.559E-02  0.000E+00   0.0E+00
   23   78  8.980E+01  7.433E+07  8.987E-05  7.971E-05  0.000E+00  0.000E+00  3.856E+01   1.1E+00
   23   79  8.957E+01  1.847E+08  3.702E-04  3.275E-04  0.000E+00  0.000E+00  1.542E-01   9.3E-01
   23   80  8.955E+01  0.000E+00  0.000E+00  0.000E+00  0.000E+00  0.000E+00  7.495E-02   0.0E+00
   23   81  8.942E+01  2.771E+09  3.322E-03  2.933E-03  0.000E+00  0.000E+00  5.891E+00   7.7E-01
   23   82  8.950E+01  0.000E+00  0.000E+00  0.000E+00  0.000E+00  2.508E-04  0.000E+00   0.0E+00
   23   83  8.934E+01  1.227E+07  2.448E-05  2.160E-05  0.000E+00  0.000E+00  1.201E+01   6.4E-01
   23   84  8.943E+01  0.000E+00  0.000E+00  0.000E+00  7.656E+04  2.797E-02  0.000E+00   0.0E+00
   23   85  8.843E+01  9.192E+09  3.592E-03  3.138E-03  0.000E+00  0.000E+00  0.000E+00   8.8E-01
   23   86  8.669E+01  4.957E+08  5.585E-04  4.782E-04  0.000E+00  0.000E+00  7.690E-01   1.3E+00
   23   87  8.657E+01  1.845E+08  2.073E-04  1.773E-04  0.000E+00  0.000E+00  5.480E-01   1.6E+00
   23   88  8.652E+01  8.437E+07  1.578E-04  1.349E-04  0.000E+00  0.000E+00  1.742E-01   8.0E-01
   23   89  8.633E+01  0.000E+00  0.000E+00  0.000E+00  0.000E+00  4.178E+00  0.000E+00   0.0E+00
   23   90  8.625E+01  0.000E+00  0.000E+00  0.000E+00  1.281E+05  9.387E-01  0.000E+00   0.0E+00
   23   92  8.612E+01  0.000E+00  0.000E+00  0.000E+00  4.237E+04  1.674E-03  0.000E+00   0.0E+00
   23   93  8.608E+01  0.000E+00  0.000E+00  0.000E+00  6.399E+04  0.000E+00  0.000E+00   0.0E+00
   23   94  8.597E+01  0.000E+00  0.000E+00  0.000E+00  4.055E+05  6.097E-02  0.000E+00   0.0E+00
   23   95  8.592E+01  0.000E+00  0.000E+00  0.000E+00  3.986E+00  0.000E+00  0.000E+00   0.0E+00
   23   96  8.575E+01  1.004E+09  3.690E-04  3.125E-04  0.000E+00  0.000E+00  0.000E+00   1.8E+00
   23   97  8.537E+01  0.000E+00  0.000E+00  0.000E+00  4.040E+05  4.818E-02  0.000E+00   0.0E+00
   23   98  8.475E+01  6.572E+09  7.077E-03  5.924E-03  0.000E+00  0.000E+00  7.534E+01   9.0E-01
   23  101  8.473E+01  6.528E+09  1.171E-02  9.800E-03  0.000E+00  0.000E+00  2.009E+02   9.1E-01
   23  102  8.467E+01  0.000E+00  0.000E+00  0.000E+00  0.000E+00  0.000E+00  5.110E+02   0.0E+00
   23  103  8.466E+01  5.301E+10  9.492E-02  7.937E-02  0.000E+00  0.000E+00  8.449E+01   9.7E-01
   23  104  8.465E+01  0.000E+00  0.000E+00  0.000E+00  1.666E+06  5.757E-03  0.000E+00   0.0E+00
   23  105  8.465E+01  0.000E+00  0.000E+00  0.000E+00  0.000E+00  0.000E+00  2.252E+02   0.0E+00
   23  106  8.464E+01  0.000E+00  0.000E+00  0.000E+00  5.499E+06  0.000E+00  0.000E+00   0.0E+00
   23  110  8.459E+01  0.000E+00  0.000E+00  0.000E+00  1.105E+07  0.000E+00  0.000E+00   0.0E+00
   23  114  8.340E+01  0.000E+00  0.000E+00  0.000E+00  7.834E+04  4.814E-01  0.000E+00   0.0E+00
   23  115  8.338E+01  0.000E+00  0.000E+00  0.000E+00  7.132E+04  2.444E-01  0.000E+00   0.0E+00
   23  116  8.332E+01  0.000E+00  0.000E+00  0.000E+00  3.221E+04  0.000E+00  0.000E+00   0.0E+00
   23  117  8.289E+01  0.000E+00  0.000E+00  0.000E+00  1.157E+05  3.875E-01  0.000E+00   0.0E+00
   23  118  8.208E+01  0.000E+00  0.000E+00  0.000E+00  0.000E+00  0.000E+00  2.903E+01   0.0E+00
   23  120  8.206E+01  0.000E+00  0.000E+00  0.000E+00  0.000E+00  0.000E+00  1.516E+02   0.0E+00
   23  121  8.205E+01  3.420E+10  5.752E-02  4.661E-02  0.000E+00  0.000E+00  1.081E+02   9.9E-01
   23  122  8.198E+01  0.000E+00  0.000E+00  0.000E+00  8.746E+06  0.000E+00  0.000E+00   0.0E+00
   24   25  2.468E+04  0.000E+00  0.000E+00  0.000E+00  7.425E-07  1.604E-02  0.000E+00   0.0E+00
   24   26  2.052E+04  0.000E+00  0.000E+00  0.000E+00  7.653E-06  9.506E-01  0.000E+00   0.0E+00
   24   27  2.024E+03  0.000E+00  0.000E+00  0.000E+00  1.512E+00  6.736E+01  0.000E+00   0.0E+00
   24   28  3.340E+02  4.520E+01  4.537E-10  2.494E-09  0.000E+00  0.000E+00  5.681E-03   2.8E+01
   24   29  2.970E+02  0.000E+00  0.000E+00  0.000E+00  0.000E+00  0.000E+00  3.301E-03   0.0E+00
   24   30  2.056E+02  0.000E+00  0.000E+00  0.000E+00  5.197E+03  0.000E+00  0.000E+00   0.0E+00
   24   31  2.050E+02  0.000E+00  0.000E+00  0.000E+00  7.364E+02  4.158E+00  0.000E+00   0.0E+00
   24   32  2.027E+02  0.000E+00  0.000E+00  0.000E+00  1.053E+01  8.413E-01  0.000E+00   0.0E+00
   24   33  1.975E+02  0.000E+00  0.000E+00  0.000E+00  9.048E-01  3.259E+00  0.000E+00   0.0E+00
   24   34  1.635E+02  0.000E+00  0.000E+00  0.000E+00  1.376E+04  2.918E-03  0.000E+00   0.0E+00
   24   35  1.627E+02  0.000E+00  0.000E+00  0.000E+00  4.645E+04  1.203E-01  0.000E+00   0.0E+00
   24   36  1.541E+02  0.000E+00  0.000E+00  0.000E+00  1.894E+06  0.000E+00  0.000E+00   0.0E+00
   24   37  1.537E+02  0.000E+00  0.000E+00  0.000E+00  5.178E+05  5.274E-02  0.000E+00   0.0E+00
   24   38  1.471E+02  8.782E+06  1.709E-05  4.138E-05  0.000E+00  0.000E+00  1.171E+00   1.2E+00
   24   39  1.462E+02  2.247E+07  7.199E-05  1.732E-04  0.000E+00  0.000E+00  5.782E-01   3.5E+00
   24   40  1.462E+02  4.460E+05  2.000E-06  4.813E-06  0.000E+00  0.000E+00  1.177E-01   6.3E+00
   24   41  1.451E+02  2.289E+08  4.337E-04  1.036E-03  0.000E+00  0.000E+00  1.938E-01   1.3E+00
   24   42  1.446E+02  4.478E+06  1.404E-05  3.343E-05  0.000E+00  0.000E+00  1.230E+00   3.7E-01
   24   43  1.411E+02  0.000E+00  0.000E+00  0.000E+00  0.000E+00  0.000E+00  2.534E-01   0.0E+00
   24   44  1.394E+02  3.253E+10  5.688E-02  1.305E-01  0.000E+00  0.000E+00  2.605E-01   9.0E-01
   24   45  1.385E+02  4.035E+09  1.160E-02  2.644E-02  0.000E+00  0.000E+00  4.228E+00   7.6E-01
   24   46  1.378E+02  1.116E+08  1.906E-04  4.323E-04  0.000E+00  0.000E+00  1.172E+00   6.3E-01
   24   47  1.361E+02  3.618E+08  1.406E-03  3.148E-03  0.000E+00  0.000E+00  8.664E-01   4.1E-01
   24   48  1.358E+02  3.020E+08  5.006E-04  1.119E-03  0.000E+00  0.000E+00  4.572E+00   3.9E-01
   24   49  1.358E+02  2.769E+09  7.652E-03  1.710E-02  0.000E+00  0.000E+00  8.921E+00   2.6E-01
   24   50  1.324E+02  0.000E+00  0.000E+00  0.000E+00  0.000E+00  0.000E+00  1.208E+01   0.0E+00
   24   51  1.317E+02  4.289E+09  1.115E-02  2.418E-02  0.000E+00  0.000E+00  1.168E+01   3.9E-01
   24   52  1.294E+02  0.000E+00  0.000E+00  0.000E+00  8.759E+04  0.000E+00  0.000E+00   0.0E+00
   24   53  1.291E+02  0.000E+00  0.000E+00  0.000E+00  3.387E+04  1.183E+00  0.000E+00   0.0E+00
   24   54  1.286E+02  0.000E+00  0.000E+00  0.000E+00  6.224E+03  0.000E+00  0.000E+00   0.0E+00
   24   55  1.285E+02  0.000E+00  0.000E+00  0.000E+00  6.311E+04  3.295E-01  0.000E+00   0.0E+00
   24   56  1.283E+02  0.000E+00  0.000E+00  0.000E+00  6.227E+04  5.371E-03  0.000E+00   0.0E+00
   24   57  1.278E+02  0.000E+00  0.000E+00  0.000E+00  1.642E+03  4.593E-04  0.000E+00   0.0E+00
   24   58  1.275E+02  0.000E+00  0.000E+00  0.000E+00  7.235E+03  1.575E-02  0.000E+00   0.0E+00
   24   59  1.256E+02  0.000E+00  0.000E+00  0.000E+00  4.493E+03  1.465E+00  0.000E+00   0.0E+00
   24   61  1.226E+02  0.000E+00  0.000E+00  0.000E+00  0.000E+00  0.000E+00  2.581E+01   0.0E+00
   24   62  1.224E+02  0.000E+00  0.000E+00  0.000E+00  2.140E+06  4.872E+00  0.000E+00   0.0E+00
   24   63  1.222E+02  1.522E+10  4.769E-02  9.591E-02  0.000E+00  0.000E+00  2.996E+00   9.8E-01
   24   64  1.221E+02  0.000E+00  0.000E+00  0.000E+00  0.000E+00  0.000E+00  6.764E+01   0.0E+00
   24   65  1.223E+02  0.000E+00  0.000E+00  0.000E+00  2.476E+05  7.790E-01  0.000E+00   0.0E+00
   24   66  1.221E+02  0.000E+00  0.000E+00  0.000E+00  4.830E+05  2.603E+00  0.000E+00   0.0E+00
   24   67  1.219E+02  9.748E+09  2.171E-02  4.354E-02  0.000E+00  0.000E+00  1.795E+01   8.4E-01
   24   68  1.218E+02  1.140E+09  3.551E-03  7.122E-03  0.000E+00  0.000E+00  2.109E-02   9.1E-01
   24   69  1.217E+02  7.744E+07  1.031E-04  2.065E-04  0.000E+00  0.000E+00  1.886E+01   2.4E-02
   24   70  1.217E+02  4.753E+06  1.055E-05  2.113E-05  0.000E+00  0.000E+00  6.651E+00   2.6E+00
   24   71  1.199E+02  0.000E+00  0.000E+00  0.000E+00  1.088E+06  2.525E-02  0.000E+00   0.0E+00
   24   72  1.170E+02  2.772E+11  7.966E-01  1.535E+00  0.000E+00  0.000E+00  4.300E+02   9.9E-01
   24   73  1.170E+02  0.000E+00  0.000E+00  0.000E+00  0.000E+00  0.000E+00  8.281E+02   0.0E+00
   24   74  1.166E+02  2.718E+10  5.543E-02  1.064E-01  0.000E+00  0.000E+00  1.360E+02   9.0E-01
   24   75  1.166E+02  2.344E+08  6.690E-04  1.284E-03  0.000E+00  0.000E+00  9.663E+00   7.9E-01
   24   76  9.327E+01  0.000E+00  0.000E+00  0.000E+00  7.589E+03  1.004E-02  0.000E+00   0.0E+00
   24   77  9.312E+01  0.000E+00  0.000E+00  0.000E+00  3.498E+04  7.871E-02  0.000E+00   0.0E+00
   24   78  9.040E+01  8.221E+06  6.044E-06  8.993E-06  0.000E+00  0.000E+00  1.104E+00   8.6E-01
   24   79  9.017E+01  3.104E+08  3.783E-04  5.615E-04  0.000E+00  0.000E+00  5.653E-04   7.6E-01
   24   80  9.014E+01  1.223E+07  2.086E-05  3.095E-05  0.000E+00  0.000E+00  3.228E-01   7.5E-01
   24   81  9.001E+01  6.172E+08  4.498E-04  6.665E-04  0.000E+00  0.000E+00  3.409E-01   8.6E-01
   24   82  9.009E+01  0.000E+00  0.000E+00  0.000E+00  8.728E+05  0.000E+00  0.000E+00   0.0E+00
   24   83  8.993E+01  2.414E+06  2.927E-06  4.333E-06  0.000E+00  0.000E+00  1.166E+00   4.3E-01
   24   84  9.002E+01  0.000E+00  0.000E+00  0.000E+00  2.393E+05  8.141E-03  0.000E+00   0.0E+00
   24   85  8.901E+01  0.000E+00  0.000E+00  0.000E+00  0.000E+00  0.000E+00  3.008E-01   0.0E+00
   24   86  8.725E+01  7.701E+09  5.273E-03  7.572E-03  0.000E+00  0.000E+00  1.656E+00   1.1E+00
   24   87  8.713E+01  5.791E+08  3.954E-04  5.672E-04  0.000E+00  0.000E+00  2.632E+00   1.1E+00
   24   88  8.708E+01  6.120E+08  6.958E-04  9.973E-04  0.000E+00  0.000E+00  5.894E-01   1.1E+00
   24   89  8.688E+01  0.000E+00  0.000E+00  0.000E+00  8.145E+04  0.000E+00  0.000E+00   0.0E+00
   24   90  8.680E+01  0.000E+00  0.000E+00  0.000E+00  1.281E+03  5.972E-01  0.000E+00   0.0E+00
   24   91  8.671E+01  0.000E+00  0.000E+00  0.000E+00  2.907E+03  0.000E+00  0.000E+00   0.0E+00
   24   92  8.667E+01  0.000E+00  0.000E+00  0.000E+00  1.617E+04  1.675E-01  0.000E+00   0.0E+00
   24   93  8.663E+01  0.000E+00  0.000E+00  0.000E+00  3.634E+04  3.619E-04  0.000E+00   0.0E+00
   24   94  8.652E+01  0.000E+00  0.000E+00  0.000E+00  1.045E+04  4.066E-03  0.000E+00   0.0E+00
   24   95  8.646E+01  0.000E+00  0.000E+00  0.000E+00  1.501E+03  6.485E-03  0.000E+00   0.0E+00
   24   96  8.629E+01  0.000E+00  0.000E+00  0.000E+00  0.000E+00  0.000E+00  1.199E+01   0.0E+00
   24   97  8.592E+01  0.000E+00  0.000E+00  0.000E+00  4.026E+04  3.344E-01  0.000E+00   0.0E+00
   24   98  8.529E+01  9.027E+07  5.907E-05  8.292E-05  0.000E+00  0.000E+00  1.305E+01   2.3E-01
   24  100  8.528E+01  0.000E+00  0.000E+00  0.000E+00  0.000E+00  0.000E+00  1.811E+01   0.0E+00
   24  101  8.527E+01  5.263E+07  5.737E-05  8.052E-05  0.000E+00  0.000E+00  1.337E+00   1.3E+00
   24  102  8.520E+01  1.574E+08  2.398E-04  3.363E-04  0.000E+00  0.000E+00  6.679E-02   1.0E+00
   24  103  8.519E+01  2.470E+09  2.687E-03  3.768E-03  0.000E+00  0.000E+00  2.164E+01   9.9E-01
   24  104  8.518E+01  0.000E+00  0.000E+00  0.000E+00  8.637E+04  2.436E-03  0.000E+00   0.0E+00
   24  105  8.518E+01  7.352E+09  1.120E-02  1.570E-02  0.000E+00  0.000E+00  4.518E+00   9.6E-01
   24  106  8.518E+01  0.000E+00  0.000E+00  0.000E+00  3.216E+04  1.250E-03  0.000E+00   0.0E+00
   24  107  8.517E+01  0.000E+00  0.000E+00  0.000E+00  0.000E+00  0.000E+00  6.296E+01   0.0E+00
   24  110  8.512E+01  0.000E+00  0.000E+00  0.000E+00  8.797E+05  1.415E-02  0.000E+00   0.0E+00
   24  111  8.512E+01  0.000E+00  0.000E+00  0.000E+00  1.031E+05  0.000E+00  0.000E+00   0.0E+00
   24  112  8.510E+01  0.000E+00  0.000E+00  0.000E+00  2.032E+06  0.000E+00  0.000E+00   0.0E+00
   24  114  8.391E+01  0.000E+00  0.000E+00  0.000E+00  9.509E+05  3.223E+00  0.000E+00   0.0E+00
   24  115  8.389E+01  0.000E+00  0.000E+00  0.000E+00  1.622E+05  5.987E-01  0.000E+00   0.0E+00
   24  116  8.383E+01  0.000E+00  0.000E+00  0.000E+00  2.207E+05  1.298E+00  0.000E+00   0.0E+00
   24  117  8.340E+01  0.000E+00  0.000E+00  0.000E+00  5.384E+05  1.489E-01  0.000E+00   0.0E+00
   24  118  8.259E+01  1.015E+11  1.453E-01  1.975E-01  0.000E+00  0.000E+00  3.245E+02   9.9E-01
   24  119  8.257E+01  0.000E+00  0.000E+00  0.000E+00  0.000E+00  0.000E+00  6.235E+02   0.0E+00
   24  120  8.256E+01  2.138E+08  3.058E-04  4.156E-04  0.000E+00  0.000E+00  4.850E+00   9.0E-01
   24  121  8.255E+01  8.618E+09  8.803E-03  1.196E-02  0.000E+00  0.000E+00  1.093E+02   9.3E-01
   24  122  8.248E+01  0.000E+00  0.000E+00  0.000E+00  2.974E+06  8.410E-02  0.000E+00   0.0E+00
   24  123  8.248E+01  0.000E+00  0.000E+00  0.000E+00  6.738E+04  0.000E+00  0.000E+00   0.0E+00
   24  124  8.247E+01  0.000E+00  0.000E+00  0.000E+00  2.929E+07  0.000E+00  0.000E+00   0.0E+00
   25   26  1.218E+05  0.000E+00  0.000E+00  0.000E+00  8.133E-10  2.269E-03  0.000E+00   0.0E+00
   25   27  2.205E+03  0.000E+00  0.000E+00  0.000E+00  1.062E+00  2.154E+02  0.000E+00   0.0E+00
   25   28  3.386E+02  1.602E+06  1.652E-05  9.209E-05  0.000E+00  0.000E+00  3.524E-02   1.9E-02
   25   29  3.006E+02  0.000E+00  0.000E+00  0.000E+00  0.000E+00  0.000E+00  4.082E-02   0.0E+00
   25   30  2.074E+02  0.000E+00  0.000E+00  0.000E+00  1.880E+03  0.000E+00  0.000E+00   0.0E+00
   25   31  2.067E+02  0.000E+00  0.000E+00  0.000E+00  2.848E+02  2.302E-01  0.000E+00   0.0E+00
   25   32  2.044E+02  0.000E+00  0.000E+00  0.000E+00  2.284E+02  1.386E+01  0.000E+00   0.0E+00
   25   33  1.991E+02  0.000E+00  0.000E+00  0.000E+00  8.683E+00  2.589E+01  0.000E+00   0.0E+00
   25   34  1.646E+02  0.000E+00  0.000E+00  0.000E+00  6.149E+04  1.504E-02  0.000E+00   0.0E+00
   25   35  1.638E+02  0.000E+00  0.000E+00  0.000E+00  1.923E+04  3.175E-01  0.000E+00   0.0E+00
   25   36  1.551E+02  0.000E+00  0.000E+00  0.000E+00  1.445E+06  0.000E+00  0.000E+00   0.0E+00
   25   37  1.546E+02  0.000E+00  0.000E+00  0.000E+00  5.887E+05  7.848E-01  0.000E+00   0.0E+00
   25   38  1.480E+02  2.960E+08  5.830E-04  1.420E-03  0.000E+00  0.000E+00  6.118E-02   9.4E-01
   25   39  1.471E+02  7.346E+07  2.382E-04  5.766E-04  0.000E+00  0.000E+00  2.564E+00   1.3E+00
   25   40  1.471E+02  2.254E+07  1.023E-04  2.477E-04  0.000E+00  0.000E+00  2.587E+00   2.6E+00
   25   41  1.460E+02  1.619E+08  3.104E-04  7.460E-04  0.000E+00  0.000E+00  7.581E-01   1.1E+00
   25   42  1.455E+02  6.959E+08  2.208E-03  5.288E-03  0.000E+00  0.000E+00  7.287E+00   1.1E+00
   25   43  1.419E+02  0.000E+00  0.000E+00  0.000E+00  0.000E+00  0.000E+00  5.804E+01   0.0E+00
   25   44  1.402E+02  2.923E+07  5.170E-05  1.193E-04  0.000E+00  0.000E+00  1.915E+00   2.9E-03
   25   45  1.392E+02  3.528E+06  1.026E-05  2.351E-05  0.000E+00  0.000E+00  3.029E+01   5.8E+01
   25   46  1.386E+02  2.037E+10  3.518E-02  8.025E-02  0.000E+00  0.000E+00  1.282E+02   1.1E+00
   25   47  1.368E+02  1.241E+09  4.875E-03  1.098E-02  0.000E+00  0.000E+00  4.663E+00   2.1E-01
   25   48  1.365E+02  1.834E+09  3.073E-03  6.906E-03  0.000E+00  0.000E+00  1.389E+00   6.2E-01
   25   49  1.365E+02  4.291E+09  1.199E-02  2.694E-02  0.000E+00  0.000E+00  3.397E-02   5.9E-01
   25   50  1.331E+02  0.000E+00  0.000E+00  0.000E+00  0.000E+00  0.000E+00  1.115E+01   0.0E+00
   25   51  1.324E+02  4.035E+09  1.061E-02  2.312E-02  0.000E+00  0.000E+00  1.427E-01   4.0E-01
   25   52  1.301E+02  0.000E+00  0.000E+00  0.000E+00  4.221E+05  0.000E+00  0.000E+00   0.0E+00
   25   53  1.298E+02  0.000E+00  0.000E+00  0.000E+00  6.562E+04  4.324E-02  0.000E+00   0.0E+00
   25   54  1.293E+02  0.000E+00  0.000E+00  0.000E+00  3.779E+04  0.000E+00  0.000E+00   0.0E+00
   25   55  1.292E+02  0.000E+00  0.000E+00  0.000E+00  3.849E+04  1.528E+00  0.000E+00   0.0E+00
   25   56  1.290E+02  0.000E+00  0.000E+00  0.000E+00  1.751E+04  2.224E-01  0.000E+00   0.0E+00
   25   57  1.284E+02  0.000E+00  0.000E+00  0.000E+00  6.282E+04  3.093E-02  0.000E+00   0.0E+00
   25   58  1.281E+02  0.000E+00  0.000E+00  0.000E+00  1.495E+05  1.511E-01  0.000E+00   0.0E+00
   25   59  1.262E+02  0.000E+00  0.000E+00  0.000E+00  2.281E+04  1.054E+01  0.000E+00   0.0E+00
   25   61  1.232E+02  0.000E+00  0.000E+00  0.000E+00  0.000E+00  0.000E+00  4.241E-01   0.0E+00
   25   62  1.230E+02  0.000E+00  0.000E+00  0.000E+00  1.500E+05  4.053E-04  0.000E+00   0.0E+00
   25   63  1.228E+02  5.607E+07  1.774E-04  3.585E-04  0.000E+00  0.000E+00  8.530E+00   1.0E+00
   25   64  1.228E+02  0.000E+00  0.000E+00  0.000E+00  0.000E+00  0.000E+00  6.640E+01   0.0E+00
   25   65  1.229E+02  0.000E+00  0.000E+00  0.000E+00  1.791E+06  8.717E-01  0.000E+00   0.0E+00
   25   66  1.227E+02  0.000E+00  0.000E+00  0.000E+00  5.019E+05  1.689E+00  0.000E+00   0.0E+00
   25   67  1.225E+02  2.451E+09  5.511E-03  1.111E-02  0.000E+00  0.000E+00  1.187E+01   1.1E+00
   25   68  1.224E+02  2.807E+10  8.832E-02  1.780E-01  0.000E+00  0.000E+00  2.530E+02   1.1E+00
   25   69  1.223E+02  3.328E+09  4.475E-03  9.007E-03  0.000E+00  0.000E+00  6.404E+00   8.4E-01
   25   70  1.223E+02  1.949E+10  4.368E-02  8.792E-02  0.000E+00  0.000E+00  2.554E+02   8.3E-01
   25   71  1.205E+02  0.000E+00  0.000E+00  0.000E+00  1.213E+06  1.086E+00  0.000E+00   0.0E+00
   25   72  1.176E+02  4.822E+08  1.399E-03  2.708E-03  0.000E+00  0.000E+00  2.574E+01   1.0E+00
   25   73  1.176E+02  0.000E+00  0.000E+00  0.000E+00  0.000E+00  0.000E+00  1.827E+02   0.0E+00
   25   74  1.172E+02  2.324E+10  4.786E-02  9.233E-02  0.000E+00  0.000E+00  4.653E+00   9.8E-01
   25   75  1.172E+02  2.623E+11  7.557E-01  1.457E+00  0.000E+00  0.000E+00  3.762E+03   9.7E-01
   25   76  9.362E+01  0.000E+00  0.000E+00  0.000E+00  3.431E+04  8.119E-03  0.000E+00   0.0E+00
   25   77  9.347E+01  0.000E+00  0.000E+00  0.000E+00  1.738E+04  1.298E-01  0.000E+00   0.0E+00
   25   78  9.073E+01  3.265E+08  2.418E-04  3.611E-04  0.000E+00  0.000E+00  3.332E-01   8.6E-01
   25   79  9.050E+01  6.590E+07  8.091E-05  1.205E-04  0.000E+00  0.000E+00  1.225E+00   8.8E-01
   25   80  9.047E+01  8.686E+07  1.492E-04  2.222E-04  0.000E+00  0.000E+00  2.204E+00   7.1E-01
   25   81  9.034E+01  1.239E+08  9.098E-05  1.353E-04  0.000E+00  0.000E+00  3.077E-01   8.6E-01
   25   82  9.042E+01  0.000E+00  0.000E+00  0.000E+00  6.729E+05  0.000E+00  0.000E+00   0.0E+00
   25   83  9.026E+01  4.297E+08  5.248E-04  7.798E-04  0.000E+00  0.000E+00  7.498E+00   8.5E-01
   25   84  9.035E+01  0.000E+00  0.000E+00  0.000E+00  2.766E+05  2.733E-01  0.000E+00   0.0E+00
   25   85  8.933E+01  0.000E+00  0.000E+00  0.000E+00  0.000E+00  0.000E+00  4.292E+01   0.0E+00
   25   86  8.756E+01  1.181E+08  8.143E-05  1.174E-04  0.000E+00  0.000E+00  1.146E+01   1.2E+00
   25   87  8.744E+01  8.271E+09  5.688E-03  8.187E-03  0.000E+00  0.000E+00  1.148E+02   1.1E+00
   25   88  8.739E+01  9.416E+08  1.078E-03  1.551E-03  0.000E+00  0.000E+00  2.938E+01   9.9E-01
   25   89  8.719E+01  0.000E+00  0.000E+00  0.000E+00  2.040E+05  0.000E+00  0.000E+00   0.0E+00
   25   90  8.711E+01  0.000E+00  0.000E+00  0.000E+00  4.882E+04  2.238E-02  0.000E+00   0.0E+00
   25   91  8.702E+01  0.000E+00  0.000E+00  0.000E+00  1.679E+04  0.000E+00  0.000E+00   0.0E+00
   25   92  8.698E+01  0.000E+00  0.000E+00  0.000E+00  2.503E+03  1.037E+00  0.000E+00   0.0E+00
   25   93  8.694E+01  0.000E+00  0.000E+00  0.000E+00  5.278E+03  1.169E-01  0.000E+00   0.0E+00
   25   94  8.682E+01  0.000E+00  0.000E+00  0.000E+00  2.352E+04  1.413E-02  0.000E+00   0.0E+00
   25   95  8.677E+01  0.000E+00  0.000E+00  0.000E+00  6.383E+04  2.085E-01  0.000E+00   0.0E+00
   25   96  8.660E+01  0.000E+00  0.000E+00  0.000E+00  0.000E+00  0.000E+00  2.566E+01   0.0E+00
   25   97  8.622E+01  0.000E+00  0.000E+00  0.000E+00  6.027E+03  4.704E+00  0.000E+00   0.0E+00
   25   98  8.558E+01  9.009E+08  5.935E-04  8.361E-04  0.000E+00  0.000E+00  3.833E+00   8.7E-01
   25  100  8.557E+01  0.000E+00  0.000E+00  0.000E+00  0.000E+00  0.000E+00  3.943E-01   0.0E+00
   25  101  8.556E+01  5.387E+09  5.912E-03  8.326E-03  0.000E+00  0.000E+00  1.671E+02   9.1E-01
   25  102  8.550E+01  8.695E+09  1.334E-02  1.877E-02  0.000E+00  0.000E+00  1.341E+02   1.0E+00
   25  103  8.549E+01  2.384E+08  2.612E-04  3.675E-04  0.000E+00  0.000E+00  2.992E+01   1.1E+00
   25  104  8.548E+01  0.000E+00  0.000E+00  0.000E+00  4.890E+05  5.247E-03  0.000E+00   0.0E+00
   25  105  8.548E+01  2.134E+06  3.272E-06  4.604E-06  0.000E+00  0.000E+00  1.035E+01   1.2E+00
   25  106  8.547E+01  0.000E+00  0.000E+00  0.000E+00  1.362E+06  1.131E-02  0.000E+00   0.0E+00
   25  107  8.547E+01  0.000E+00  0.000E+00  0.000E+00  0.000E+00  0.000E+00  4.547E+01   0.0E+00
   25  110  8.542E+01  0.000E+00  0.000E+00  0.000E+00  3.895E+05  8.502E-03  0.000E+00   0.0E+00
   25  111  8.541E+01  0.000E+00  0.000E+00  0.000E+00  2.564E+06  0.000E+00  0.000E+00   0.0E+00
   25  112  8.539E+01  0.000E+00  0.000E+00  0.000E+00  8.868E-01  0.000E+00  0.000E+00   0.0E+00
   25  114  8.420E+01  0.000E+00  0.000E+00  0.000E+00  5.147E+04  5.974E-02  0.000E+00   0.0E+00
   25  115  8.418E+01  0.000E+00  0.000E+00  0.000E+00  8.718E+05  2.593E+00  0.000E+00   0.0E+00
   25  116  8.412E+01  0.000E+00  0.000E+00  0.000E+00  2.448E+05  1.084E+00  0.000E+00   0.0E+00
   25  117  8.369E+01  0.000E+00  0.000E+00  0.000E+00  6.139E+05  1.370E-01  0.000E+00   0.0E+00
   25  118  8.286E+01  3.665E+07  5.282E-05  7.204E-05  0.000E+00  0.000E+00  1.037E+01   1.0E+00
   25  119  8.285E+01  0.000E+00  0.000E+00  0.000E+00  0.000E+00  0.000E+00  1.417E+02   0.0E+00
   25  120  8.283E+01  9.930E+10  1.430E-01  1.950E-01  0.000E+00  0.000E+00  2.942E+03   9.8E-01
   25  121  8.282E+01  8.891E+09  9.143E-03  1.247E-02  0.000E+00  0.000E+00  3.077E+00   9.9E-01
   25  122  8.276E+01  0.000E+00  0.000E+00  0.000E+00  3.573E+06  8.104E-02  0.000E+00   0.0E+00
   25  123  8.275E+01  0.000E+00  0.000E+00  0.000E+00  2.694E+07  0.000E+00  0.000E+00   0.0E+00
   25  124  8.275E+01  0.000E+00  0.000E+00  0.000E+00  5.423E+05  0.000E+00  0.000E+00   0.0E+00
   26   27  2.246E+03  0.000E+00  0.000E+00  0.000E+00  2.623E-02  0.000E+00  0.000E+00   0.0E+00
   26   28  3.396E+02  0.000E+00  0.000E+00  0.000E+00  0.000E+00  0.000E+00  1.806E-02   0.0E+00
   26   31  2.070E+02  0.000E+00  0.000E+00  0.000E+00  1.937E+03  0.000E+00  0.000E+00   0.0E+00
   26   32  2.048E+02  0.000E+00  0.000E+00  0.000E+00  2.624E+01  4.895E+00  0.000E+00   0.0E+00
   26   33  1.994E+02  0.000E+00  0.000E+00  0.000E+00  1.120E+03  0.000E+00  0.000E+00   0.0E+00
   26   34  1.648E+02  0.000E+00  0.000E+00  0.000E+00  4.218E+04  1.055E-02  0.000E+00   0.0E+00
   26   35  1.640E+02  0.000E+00  0.000E+00  0.000E+00  4.661E-01  0.000E+00  0.000E+00   0.0E+00
   26   37  1.548E+02  0.000E+00  0.000E+00  0.000E+00  1.680E+06  0.000E+00  0.000E+00   0.0E+00
   26   38  1.481E+02  0.000E+00  0.000E+00  0.000E+00  0.000E+00  0.000E+00  1.650E+00   0.0E+00
   26   39  1.472E+02  1.197E+08  2.778E-04  9.427E-04  0.000E+00  0.000E+00  2.042E-01   8.4E-01
   26   40  1.472E+02  3.635E+06  1.182E-05  4.009E-05  0.000E+00  0.000E+00  3.020E+00   1.1E+01
   26   41  1.462E+02  0.000E+00  0.000E+00  0.000E+00  0.000E+00  0.000E+00  2.277E-02   0.0E+00
   26   42  1.456E+02  1.328E+07  3.016E-05  1.012E-04  0.000E+00  0.000E+00  2.493E-01   2.9E+00
   26   44  1.404E+02  0.000E+00  0.000E+00  0.000E+00  0.000E+00  0.000E+00  7.144E+01   0.0E+00
   26   45  1.394E+02  2.870E+10  5.974E-02  1.919E-01  0.000E+00  0.000E+00  1.099E+02   9.0E-01
   26   46  1.387E+02  0.000E+00  0.000E+00  0.000E+00  0.000E+00  0.000E+00  1.628E+01   0.0E+00
   26   47  1.370E+02  6.883E+09  1.936E-02  6.110E-02  0.000E+00  0.000E+00  2.798E+01   4.0E-01
   26   48  1.367E+02  0.000E+00  0.000E+00  0.000E+00  0.000E+00  0.000E+00  3.884E+00   0.0E+00
   26   49  1.367E+02  6.310E+08  1.262E-03  3.975E-03  0.000E+00  0.000E+00  1.738E+01   2.3E+00
   26   51  1.326E+02  7.367E+09  1.386E-02  4.235E-02  0.000E+00  0.000E+00  9.726E+00   3.4E-01
   26   53  1.299E+02  0.000E+00  0.000E+00  0.000E+00  1.086E+05  0.000E+00  0.000E+00   0.0E+00
   26   54  1.294E+02  0.000E+00  0.000E+00  0.000E+00  6.224E+04  3.413E-01  0.000E+00   0.0E+00
   26   55  1.293E+02  0.000E+00  0.000E+00  0.000E+00  1.271E+05  8.338E-01  0.000E+00   0.0E+00
   26   56  1.291E+02  0.000E+00  0.000E+00  0.000E+00  2.203E+01  2.267E-03  0.000E+00   0.0E+00
   26   57  1.286E+02  0.000E+00  0.000E+00  0.000E+00  1.590E+04  2.122E-02  0.000E+00   0.0E+00
   26   58  1.283E+02  0.000E+00  0.000E+00  0.000E+00  2.413E+03  6.091E-04  0.000E+00   0.0E+00
   26   59  1.263E+02  0.000E+00  0.000E+00  0.000E+00  1.120E+04  0.000E+00  0.000E+00   0.0E+00
   26   60  1.233E+02  0.000E+00  0.000E+00  0.000E+00  0.000E+00  0.000E+00  4.988E-01   0.0E+00
   26   61  1.233E+02  4.992E+09  1.463E-02  4.158E-02  0.000E+00  0.000E+00  1.974E+00   9.9E-01
   26   62  1.232E+02  0.000E+00  0.000E+00  0.000E+00  7.505E+05  1.824E+00  0.000E+00   0.0E+00
   26   63  1.229E+02  1.799E+09  4.075E-03  1.154E-02  0.000E+00  0.000E+00  8.377E-01   9.7E-01
   26   64  1.229E+02  3.799E+09  1.106E-02  3.131E-02  0.000E+00  0.000E+00  4.019E+01   9.7E-01
   26   65  1.230E+02  0.000E+00  0.000E+00  0.000E+00  6.864E+05  8.561E-01  0.000E+00   0.0E+00
   26   66  1.228E+02  0.000E+00  0.000E+00  0.000E+00  2.571E+06  7.829E+00  0.000E+00   0.0E+00
   26   67  1.226E+02  1.015E+09  1.634E-03  4.617E-03  0.000E+00  0.000E+00  3.511E-03   7.2E-01
   26   68  1.226E+02  4.342E+09  9.778E-03  2.762E-02  0.000E+00  0.000E+00  3.546E+01   8.1E-01
   26   69  1.224E+02  0.000E+00  0.000E+00  0.000E+00  0.000E+00  0.000E+00  1.856E+00   0.0E+00
   26   70  1.224E+02  3.500E+08  5.614E-04  1.583E-03  0.000E+00  0.000E+00  1.379E+01   2.4E-01
   26   71  1.206E+02  0.000E+00  0.000E+00  0.000E+00  2.040E+05  0.000E+00  0.000E+00   0.0E+00
   26   72  1.177E+02  1.492E+10  3.099E-02  8.405E-02  0.000E+00  0.000E+00  1.210E+01   9.9E-01
   26   73  1.177E+02  2.994E+11  7.989E-01  2.166E+00  0.000E+00  0.000E+00  4.410E+03   9.9E-01
   26   74  1.173E+02  2.040E+09  3.006E-03  8.126E-03  0.000E+00  0.000E+00  1.527E-01   8.5E-01
   26   75  1.173E+02  2.506E+10  5.167E-02  1.396E-01  0.000E+00  0.000E+00  6.357E+02   9.0E-01
   26   76  9.369E+01  0.000E+00  0.000E+00  0.000E+00  2.367E+04  1.197E-03  0.000E+00   0.0E+00
   26   77  9.354E+01  0.000E+00  0.000E+00  0.000E+00  1.067E+03  0.000E+00  0.000E+00   0.0E+00
   26   78  9.080E+01  0.000E+00  0.000E+00  0.000E+00  0.000E+00  0.000E+00  1.024E+00   0.0E+00
   26   79  9.056E+01  1.783E+08  1.566E-04  3.268E-04  0.000E+00  0.000E+00  1.827E-01   7.5E-01
   26   80  9.054E+01  2.119E+08  2.604E-04  5.434E-04  0.000E+00  0.000E+00  8.865E-01   7.3E-01
   26   81  9.041E+01  0.000E+00  0.000E+00  0.000E+00  0.000E+00  0.000E+00  9.596E-01   0.0E+00
   26   83  9.032E+01  1.069E+08  9.340E-05  1.944E-04  0.000E+00  0.000E+00  4.150E-01   9.6E-01
   26   84  9.042E+01  0.000E+00  0.000E+00  0.000E+00  7.930E+05  0.000E+00  0.000E+00   0.0E+00
   26   86  8.762E+01  0.000E+00  0.000E+00  0.000E+00  0.000E+00  0.000E+00  4.789E+01   0.0E+00
   26   87  8.750E+01  0.000E+00  0.000E+00  0.000E+00  0.000E+00  0.000E+00  3.324E+01   0.0E+00
   26   88  8.745E+01  8.243E+09  6.750E-03  1.360E-02  0.000E+00  0.000E+00  1.325E+02   1.1E+00
   26   90  8.717E+01  0.000E+00  0.000E+00  0.000E+00  6.237E+04  0.000E+00  0.000E+00   0.0E+00
   26   91  8.708E+01  0.000E+00  0.000E+00  0.000E+00  2.906E+04  8.384E-02  0.000E+00   0.0E+00
   26   92  8.704E+01  0.000E+00  0.000E+00  0.000E+00  2.281E+04  4.094E-01  0.000E+00   0.0E+00
   26   93  8.700E+01  0.000E+00  0.000E+00  0.000E+00  3.459E+03  1.541E-02  0.000E+00   0.0E+00
   26   94  8.689E+01  0.000E+00  0.000E+00  0.000E+00  1.723E+04  2.740E-02  0.000E+00   0.0E+00
   26   95  8.683E+01  0.000E+00  0.000E+00  0.000E+00  1.677E+01  4.022E-04  0.000E+00   0.0E+00
   26   97  8.628E+01  0.000E+00  0.000E+00  0.000E+00  5.056E+03  0.000E+00  0.000E+00   0.0E+00
   26   98  8.564E+01  0.000E+00  0.000E+00  0.000E+00  0.000E+00  0.000E+00  3.280E-01   0.0E+00
   26   99  8.564E+01  0.000E+00  0.000E+00  0.000E+00  0.000E+00  0.000E+00  2.715E-01   0.0E+00
   26  100  8.563E+01  1.888E+09  2.669E-03  5.267E-03  0.000E+00  0.000E+00  2.179E+00   9.7E-01
   26  101  8.562E+01  8.466E+07  6.646E-05  1.311E-04  0.000E+00  0.000E+00  1.227E+01   3.1E-01
   26  102  8.556E+01  1.220E+09  1.339E-03  2.641E-03  0.000E+00  0.000E+00  3.805E+01   1.0E+00
   26  103  8.554E+01  1.112E+08  8.711E-05  1.717E-04  0.000E+00  0.000E+00  2.962E-01   1.1E+00
   26  104  8.554E+01  0.000E+00  0.000E+00  0.000E+00  1.654E+04  1.370E-03  0.000E+00   0.0E+00
   26  105  8.554E+01  6.411E+08  7.032E-04  1.386E-03  0.000E+00  0.000E+00  9.957E-02   9.5E-01
   26  106  8.553E+01  0.000E+00  0.000E+00  0.000E+00  3.784E+04  3.359E-03  0.000E+00   0.0E+00
   26  107  8.553E+01  2.201E+09  3.104E-03  6.118E-03  0.000E+00  0.000E+00  5.301E+01   9.5E-01
   26  108  8.550E+01  0.000E+00  0.000E+00  0.000E+00  5.705E+05  0.000E+00  0.000E+00   0.0E+00
   26  110  8.548E+01  0.000E+00  0.000E+00  0.000E+00  1.396E+05  3.583E-04  0.000E+00   0.0E+00
   26  111  8.547E+01  0.000E+00  0.000E+00  0.000E+00  3.831E+05  1.027E-02  0.000E+00   0.0E+00
   26  112  8.545E+01  0.000E+00  0.000E+00  0.000E+00  3.065E+05  1.015E-03  0.000E+00   0.0E+00
   26  113  8.545E+01  0.000E+00  0.000E+00  0.000E+00  6.213E+05  0.000E+00  0.000E+00   0.0E+00
   26  114  8.426E+01  0.000E+00  0.000E+00  0.000E+00  3.838E+05  2.066E+00  0.000E+00   0.0E+00
   26  115  8.424E+01  0.000E+00  0.000E+00  0.000E+00  3.079E+05  6.561E-01  0.000E+00   0.0E+00
   26  116  8.418E+01  0.000E+00  0.000E+00  0.000E+00  1.218E+06  7.302E+00  0.000E+00   0.0E+00
   26  117  8.375E+01  0.000E+00  0.000E+00  0.000E+00  1.076E+05  0.000E+00  0.000E+00   0.0E+00
   26  118  8.292E+01  5.716E+09  5.892E-03  1.126E-02  0.000E+00  0.000E+00  6.539E+00   9.8E-01
   26  119  8.291E+01  1.098E+11  1.455E-01  2.780E-01  0.000E+00  0.000E+00  3.322E+03   9.9E-01
   26  120  8.289E+01  7.772E+09  8.006E-03  1.529E-02  0.000E+00  0.000E+00  4.900E+02   9.2E-01
   26  121  8.288E+01  5.479E+08  4.030E-04  7.697E-04  0.000E+00  0.000E+00  3.951E-02   9.0E-01
   26  122  8.281E+01  0.000E+00  0.000E+00  0.000E+00  4.555E+05  2.236E-05  0.000E+00   0.0E+00
   26  123  8.281E+01  0.000E+00  0.000E+00  0.000E+00  3.489E+06  4.408E-02  0.000E+00   0.0E+00
   26  124  8.281E+01  0.000E+00  0.000E+00  0.000E+00  1.978E+06  9.929E-02  0.000E+00   0.0E+00
   26  125  8.280E+01  0.000E+00  0.000E+00  0.000E+00  3.296E+07  0.000E+00  0.000E+00   0.0E+00
   27   28  4.000E+02  2.609E+04  6.259E-07  2.473E-06  0.000E+00  0.000E+00  1.528E-04   1.0E-01
   27   29  3.480E+02  4.652E+08  2.815E-03  9.677E-03  0.000E+00  0.000E+00  0.000E+00   2.4E+00
   27   30  2.289E+02  0.000E+00  0.000E+00  0.000E+00  0.000E+00  1.644E+01  0.000E+00   0.0E+00
   27   31  2.281E+02  0.000E+00  0.000E+00  0.000E+00  5.111E+00  5.892E+00  0.000E+00   0.0E+00
   27   32  2.253E+02  0.000E+00  0.000E+00  0.000E+00  3.792E+00  1.628E+00  0.000E+00   0.0E+00
   27   33  2.188E+02  0.000E+00  0.000E+00  0.000E+00  9.018E+00  3.548E-02  0.000E+00   0.0E+00
   27   34  1.779E+02  0.000E+00  0.000E+00  0.000E+00  7.440E+02  1.781E-01  0.000E+00   0.0E+00
   27   35  1.769E+02  0.000E+00  0.000E+00  0.000E+00  2.186E+05  5.819E-02  0.000E+00   0.0E+00
   27   36  1.668E+02  0.000E+00  0.000E+00  0.000E+00  0.000E+00  1.357E+00  0.000E+00   0.0E+00
   27   37  1.663E+02  0.000E+00  0.000E+00  0.000E+00  5.109E+05  2.170E-01  0.000E+00   0.0E+00
   27   38  1.586E+02  1.834E+08  6.919E-04  1.084E-03  0.000E+00  0.000E+00  2.853E+01   6.2E-01
   27   39  1.576E+02  5.748E+06  3.566E-05  5.549E-05  0.000E+00  0.000E+00  8.850E-02   3.3E-01
   27   40  1.576E+02  0.000E+00  0.000E+00  0.000E+00  0.000E+00  0.000E+00  1.140E-02   0.0E+00
   27   41  1.563E+02  3.661E+09  1.341E-02  2.071E-02  0.000E+00  0.000E+00  4.150E+00   5.8E-01
   27   42  1.558E+02  1.627E+07  9.862E-05  1.517E-04  0.000E+00  0.000E+00  1.082E+01   7.7E-01
   27   43  1.517E+02  4.910E+07  5.645E-05  8.457E-05  0.000E+00  0.000E+00  0.000E+00   1.9E-01
   27   44  1.497E+02  2.068E+09  6.951E-03  1.028E-02  0.000E+00  0.000E+00  1.769E+00   8.1E-01
   27   45  1.486E+02  1.678E+06  9.261E-06  1.360E-05  0.000E+00  0.000E+00  2.013E+00   9.1E-02
   27   46  1.479E+02  4.519E+09  1.481E-02  2.163E-02  0.000E+00  0.000E+00  2.909E+00   7.3E-01
   27   47  1.459E+02  0.000E+00  0.000E+00  0.000E+00  0.000E+00  0.000E+00  5.159E+00   0.0E+00
   27   48  1.455E+02  1.267E+09  4.022E-03  5.780E-03  0.000E+00  0.000E+00  5.404E-01   5.7E-01
   27   49  1.455E+02  3.855E+08  2.040E-03  2.931E-03  0.000E+00  0.000E+00  2.666E-01   3.8E-01
   27   50  1.416E+02  2.249E+10  2.254E-02  3.152E-02  0.000E+00  0.000E+00  0.000E+00   7.3E-01
   27   51  1.409E+02  1.219E+09  6.047E-03  8.413E-03  0.000E+00  0.000E+00  4.172E+01   3.4E+00
   27   52  1.383E+02  0.000E+00  0.000E+00  0.000E+00  0.000E+00  4.273E+01  0.000E+00   0.0E+00
   27   53  1.379E+02  0.000E+00  0.000E+00  0.000E+00  4.070E+03  2.070E+01  0.000E+00   0.0E+00
   27   55  1.372E+02  0.000E+00  0.000E+00  0.000E+00  1.039E+05  3.498E-01  0.000E+00   0.0E+00
   27   56  1.370E+02  0.000E+00  0.000E+00  0.000E+00  5.439E+02  0.000E+00  0.000E+00   0.0E+00
   27   57  1.364E+02  0.000E+00  0.000E+00  0.000E+00  3.490E+05  3.052E+00  0.000E+00   0.0E+00
   27   58  1.361E+02  0.000E+00  0.000E+00  0.000E+00  8.233E+03  0.000E+00  0.000E+00   0.0E+00
   27   59  1.339E+02  0.000E+00  0.000E+00  0.000E+00  5.068E+04  6.734E-01  0.000E+00   0.0E+00
   27   62  1.303E+02  0.000E+00  0.000E+00  0.000E+00  5.713E+05  1.382E-01  0.000E+00   0.0E+00
   27   63  1.300E+02  0.000E+00  0.000E+00  0.000E+00  0.000E+00  0.000E+00  4.385E+01   0.0E+00
   27   65  1.301E+02  0.000E+00  0.000E+00  0.000E+00  5.876E+05  2.283E+01  0.000E+00   0.0E+00
   27   66  1.299E+02  0.000E+00  0.000E+00  0.000E+00  3.272E+04  0.000E+00  0.000E+00   0.0E+00
   27   67  1.297E+02  3.453E+10  1.451E-01  1.858E-01  0.000E+00  0.000E+00  4.952E+01   9.0E-01
   27   68  1.296E+02  0.000E+00  0.000E+00  0.000E+00  0.000E+00  0.000E+00  3.305E+02   0.0E+00
   27   69  1.294E+02  7.427E+08  1.866E-03  2.386E-03  0.000E+00  0.000E+00  5.516E+00   7.8E-01
   27   70  1.294E+02  5.436E+10  2.276E-01  2.910E-01  0.000E+00  0.000E+00  4.180E+02   9.3E-01
   27   71  1.275E+02  0.000E+00  0.000E+00  0.000E+00  9.089E+05  5.553E+00  0.000E+00   0.0E+00
   27   72  1.242E+02  0.000E+00  0.000E+00  0.000E+00  0.000E+00  0.000E+00  8.664E+01   0.0E+00
   27   74  1.238E+02  1.634E+11  6.253E-01  7.645E-01  0.000E+00  0.000E+00  1.984E+02   9.5E-01
   27   75  1.237E+02  0.000E+00  0.000E+00  0.000E+00  0.000E+00  0.000E+00  3.124E+02   0.0E+00
   27   76  9.777E+01  0.000E+00  0.000E+00  0.000E+00  5.170E+02  1.703E-02  0.000E+00   0.0E+00
   27   77  9.761E+01  0.000E+00  0.000E+00  0.000E+00  1.762E+05  8.282E-03  0.000E+00   0.0E+00
   27   78  9.463E+01  1.781E+08  2.390E-04  2.234E-04  0.000E+00  0.000E+00  4.363E+01   3.9E-01
   27   79  9.437E+01  1.977E+06  4.400E-06  4.101E-06  0.000E+00  0.000E+00  1.229E-01   2.8E-02
   27   80  9.435E+01  0.000E+00  0.000E+00  0.000E+00  0.000E+00  0.000E+00  1.024E-03   0.0E+00
   27   81  9.420E+01  2.010E+09  2.674E-03  2.488E-03  0.000E+00  0.000E+00  6.740E+00   3.4E-01
   27   82  9.429E+01  0.000E+00  0.000E+00  0.000E+00  0.000E+00  1.930E-01  0.000E+00   0.0E+00
   27   83  9.411E+01  2.285E+06  5.057E-06  4.700E-06  0.000E+00  0.000E+00  1.672E+01   2.6E+00
   27   84  9.421E+01  0.000E+00  0.000E+00  0.000E+00  3.140E+05  4.116E-02  0.000E+00   0.0E+00
   27   85  9.311E+01  1.710E+09  7.408E-04  6.812E-04  0.000E+00  0.000E+00  0.000E+00   2.1E-01
   27   86  9.118E+01  2.183E+09  2.720E-03  2.450E-03  0.000E+00  0.000E+00  3.207E+00   5.4E-01
   27   87  9.105E+01  1.118E+09  1.389E-03  1.249E-03  0.000E+00  0.000E+00  1.020E+00   5.5E-01
   27   88  9.099E+01  2.008E+07  4.153E-05  3.733E-05  0.000E+00  0.000E+00  3.230E-01   1.5E+00
   27   89  9.078E+01  0.000E+00  0.000E+00  0.000E+00  0.000E+00  1.928E+01  0.000E+00   0.0E+00
   27   90  9.069E+01  0.000E+00  0.000E+00  0.000E+00  3.954E+02  1.026E+01  0.000E+00   0.0E+00
   27   92  9.055E+01  0.000E+00  0.000E+00  0.000E+00  7.417E+04  7.642E-01  0.000E+00   0.0E+00
   27   93  9.051E+01  0.000E+00  0.000E+00  0.000E+00  3.360E+03  0.000E+00  0.000E+00   0.0E+00
   27   94  9.038E+01  0.000E+00  0.000E+00  0.000E+00  1.977E+05  9.827E-01  0.000E+00   0.0E+00
   27   95  9.032E+01  0.000E+00  0.000E+00  0.000E+00  1.001E+04  0.000E+00  0.000E+00   0.0E+00
   27   96  9.014E+01  1.107E+10  4.496E-03  4.002E-03  0.000E+00  0.000E+00  0.000E+00   5.4E-01
   27   97  8.972E+01  0.000E+00  0.000E+00  0.000E+00  1.009E+05  3.741E-02  0.000E+00   0.0E+00
   27   98  8.904E+01  1.550E+08  1.842E-04  1.620E-04  0.000E+00  0.000E+00  3.951E+00   8.4E-01
   27  101  8.902E+01  1.143E+10  2.264E-02  1.990E-02  0.000E+00  0.000E+00  2.541E+02   9.2E-01
   27  102  8.895E+01  0.000E+00  0.000E+00  0.000E+00  0.000E+00  0.000E+00  2.378E+02   0.0E+00
   27  103  8.893E+01  1.814E+10  3.585E-02  3.149E-02  0.000E+00  0.000E+00  1.030E+02   9.0E-01
   27  104  8.892E+01  0.000E+00  0.000E+00  0.000E+00  3.764E+04  3.556E-02  0.000E+00   0.0E+00
   27  105  8.892E+01  0.000E+00  0.000E+00  0.000E+00  0.000E+00  0.000E+00  4.717E+01   0.0E+00
   27  106  8.892E+01  0.000E+00  0.000E+00  0.000E+00  6.569E+06  0.000E+00  0.000E+00   0.0E+00
   27  110  8.886E+01  0.000E+00  0.000E+00  0.000E+00  3.424E+06  0.000E+00  0.000E+00   0.0E+00
   27  114  8.754E+01  0.000E+00  0.000E+00  0.000E+00  2.812E+05  2.454E-02  0.000E+00   0.0E+00
   27  115  8.752E+01  0.000E+00  0.000E+00  0.000E+00  2.394E+05  9.034E+00  0.000E+00   0.0E+00
   27  116  8.746E+01  0.000E+00  0.000E+00  0.000E+00  1.542E+04  0.000E+00  0.000E+00   0.0E+00
   27  117  8.699E+01  0.000E+00  0.000E+00  0.000E+00  4.595E+05  3.752E+00  0.000E+00   0.0E+00
   27  118  8.610E+01  0.000E+00  0.000E+00  0.000E+00  0.000E+00  0.000E+00  5.638E+01   0.0E+00
   27  120  8.607E+01  0.000E+00  0.000E+00  0.000E+00  0.000E+00  0.000E+00  2.133E+02   0.0E+00
   27  121  8.606E+01  5.538E+10  1.025E-01  8.709E-02  0.000E+00  0.000E+00  1.537E+02   9.4E-01
   27  122  8.598E+01  0.000E+00  0.000E+00  0.000E+00  1.648E+07  0.000E+00  0.000E+00   0.0E+00
   28   29  2.675E+03  0.000E+00  0.000E+00  0.000E+00  0.000E+00  3.756E-03  0.000E+00   0.0E+00
   28   30  5.349E+02  3.587E+09  5.130E-02  2.710E-01  0.000E+00  0.000E+00  0.000E+00   1.0E+00
   28   31  5.305E+02  3.542E+09  1.494E-01  7.829E-01  0.000E+00  0.000E+00  1.959E-01   1.0E+00
   28   32  5.157E+02  4.021E+09  2.672E-01  1.361E+00  0.000E+00  0.000E+00  8.693E-01   1.0E+00
   28   33  4.831E+02  1.886E+08  6.597E-03  3.147E-02  0.000E+00  0.000E+00  1.896E+00   1.0E+00
   28   34  3.202E+02  3.100E+07  7.942E-04  2.512E-03  0.000E+00  0.000E+00  1.507E-02   1.2E+00
   28   35  3.173E+02  7.913E+06  1.194E-04  3.742E-04  0.000E+00  0.000E+00  2.042E-02   1.3E+00
   28   36  2.860E+02  4.414E+06  1.804E-05  5.097E-05  0.000E+00  0.000E+00  0.000E+00   1.9E+00
   28   37  2.846E+02  3.347E+06  4.064E-05  1.142E-04  0.000E+00  0.000E+00  5.975E-03   1.7E+00
   28   38  2.628E+02  0.000E+00  0.000E+00  0.000E+00  5.493E+01  1.089E+00  0.000E+00   0.0E+00
   28   39  2.600E+02  0.000E+00  0.000E+00  0.000E+00  7.566E+03  1.822E-01  0.000E+00   0.0E+00
   28   40  2.600E+02  0.000E+00  0.000E+00  0.000E+00  1.259E+04  0.000E+00  0.000E+00   0.0E+00
   28   41  2.566E+02  0.000E+00  0.000E+00  0.000E+00  3.838E+03  1.981E+00  0.000E+00   0.0E+00
   28   42  2.551E+02  0.000E+00  0.000E+00  0.000E+00  1.039E+02  1.308E+00  0.000E+00   0.0E+00
   28   43  2.443E+02  0.000E+00  0.000E+00  0.000E+00  0.000E+00  9.896E+00  0.000E+00   0.0E+00
   28   44  2.393E+02  0.000E+00  0.000E+00  0.000E+00  5.074E+04  1.063E+00  0.000E+00   0.0E+00
   28   45  2.365E+02  0.000E+00  0.000E+00  0.000E+00  4.575E+04  3.876E-01  0.000E+00   0.0E+00
   28   46  2.345E+02  0.000E+00  0.000E+00  0.000E+00  1.285E+03  9.080E+00  0.000E+00   0.0E+00
   28   47  2.296E+02  0.000E+00  0.000E+00  0.000E+00  1.624E+05  0.000E+00  0.000E+00   0.0E+00
   28   48  2.287E+02  0.000E+00  0.000E+00  0.000E+00  1.085E+05  1.378E-01  0.000E+00   0.0E+00
   28   49  2.287E+02  0.000E+00  0.000E+00  0.000E+00  1.153E+05  6.197E-02  0.000E+00   0.0E+00
   28   50  2.192E+02  0.000E+00  0.000E+00  0.000E+00  0.000E+00  1.403E+00  0.000E+00   0.0E+00
   28   51  2.174E+02  0.000E+00  0.000E+00  0.000E+00  4.419E+01  6.170E-04  0.000E+00   0.0E+00
   28   52  2.113E+02  4.771E+08  1.064E-03  2.222E-03  0.000E+00  0.000E+00  0.000E+00   8.9E-01
   28   53  2.104E+02  4.337E+08  2.878E-03  5.981E-03  0.000E+00  0.000E+00  2.467E-01   8.9E-01
   28   55  2.089E+02  3.311E+08  3.611E-03  7.451E-03  0.000E+00  0.000E+00  2.097E-01   8.9E-01
   28   56  2.083E+02  0.000E+00  0.000E+00  0.000E+00  0.000E+00  0.000E+00  2.251E-02   0.0E+00
   28   57  2.069E+02  4.435E+05  4.743E-06  9.690E-06  0.000E+00  0.000E+00  9.432E-02   8.9E-01
   28   58  2.062E+02  0.000E+00  0.000E+00  0.000E+00  0.000E+00  0.000E+00  2.141E-01   0.0E+00
   28   59  2.012E+02  3.005E+07  1.824E-04  3.624E-04  0.000E+00  0.000E+00  1.253E+00   8.9E-01
   28   62  1.933E+02  1.282E+06  1.197E-05  2.284E-05  0.000E+00  0.000E+00  1.777E-02   9.0E-01
   28   63  1.926E+02  0.000E+00  0.000E+00  0.000E+00  8.594E+00  0.000E+00  0.000E+00   0.0E+00
   28   65  1.929E+02  2.042E+08  1.899E-03  3.618E-03  0.000E+00  0.000E+00  1.063E+00   8.9E-01
   28   66  1.924E+02  0.000E+00  0.000E+00  0.000E+00  0.000E+00  0.000E+00  1.157E-01   0.0E+00
   28   67  1.919E+02  0.000E+00  0.000E+00  0.000E+00  1.998E+04  1.698E-03  0.000E+00   0.0E+00
   28   68  1.918E+02  0.000E+00  0.000E+00  0.000E+00  6.180E+04  0.000E+00  0.000E+00   0.0E+00
   28   69  1.914E+02  0.000E+00  0.000E+00  0.000E+00  1.396E+05  1.464E-03  0.000E+00   0.0E+00
   28   70  1.914E+02  0.000E+00  0.000E+00  0.000E+00  8.870E+04  3.795E-04  0.000E+00   0.0E+00
   28   71  1.871E+02  3.230E+07  1.695E-04  3.133E-04  0.000E+00  0.000E+00  1.014E-01   9.0E-01
   28   72  1.801E+02  0.000E+00  0.000E+00  0.000E+00  2.378E+00  0.000E+00  0.000E+00   0.0E+00
   28   74  1.792E+02  0.000E+00  0.000E+00  0.000E+00  3.117E+04  2.151E-03  0.000E+00   0.0E+00
   28   75  1.791E+02  0.000E+00  0.000E+00  0.000E+00  7.837E+04  0.000E+00  0.000E+00   0.0E+00
   28   76  1.294E+02  2.064E+07  8.634E-05  1.104E-04  0.000E+00  0.000E+00  8.462E-02   1.8E+00
   28   77  1.291E+02  7.462E+06  1.865E-05  2.377E-05  0.000E+00  0.000E+00  3.508E-02   1.9E+00
   28   78  1.239E+02  0.000E+00  0.000E+00  0.000E+00  1.209E+01  3.386E-01  0.000E+00   0.0E+00
   28   79  1.235E+02  0.000E+00  0.000E+00  0.000E+00  1.533E+03  2.394E-02  0.000E+00   0.0E+00
   28   80  1.235E+02  0.000E+00  0.000E+00  0.000E+00  2.731E+03  0.000E+00  0.000E+00   0.0E+00
   28   81  1.232E+02  0.000E+00  0.000E+00  0.000E+00  5.145E+02  6.478E-01  0.000E+00   0.0E+00
   28   82  1.234E+02  1.488E+07  1.131E-05  1.379E-05  0.000E+00  0.000E+00  0.000E+00   2.1E+00
   28   83  1.231E+02  0.000E+00  0.000E+00  0.000E+00  5.840E+00  1.153E-01  0.000E+00   0.0E+00
   28   84  1.232E+02  9.299E+06  2.117E-05  2.577E-05  0.000E+00  0.000E+00  4.448E-03   2.1E+00
   28   85  1.213E+02  0.000E+00  0.000E+00  0.000E+00  0.000E+00  1.065E+00  0.000E+00   0.0E+00
   28   86  1.181E+02  0.000E+00  0.000E+00  0.000E+00  1.581E+03  6.608E-01  0.000E+00   0.0E+00
   28   87  1.179E+02  0.000E+00  0.000E+00  0.000E+00  1.551E+02  1.044E+00  0.000E+00   0.0E+00
   28   88  1.178E+02  0.000E+00  0.000E+00  0.000E+00  9.288E+02  1.469E-02  0.000E+00   0.0E+00
   28   89  1.174E+02  8.610E+07  5.933E-05  6.881E-05  0.000E+00  0.000E+00  0.000E+00   6.2E-01
   28   90  1.173E+02  7.545E+07  1.556E-04  1.802E-04  0.000E+00  0.000E+00  1.278E-01   6.2E-01
   28   92  1.170E+02  5.502E+07  1.883E-04  2.177E-04  0.000E+00  0.000E+00  7.902E-02   6.2E-01
   28   93  1.170E+02  0.000E+00  0.000E+00  0.000E+00  0.000E+00  0.000E+00  2.073E-02   0.0E+00
   28   94  1.168E+02  1.178E+05  4.012E-07  4.626E-07  0.000E+00  0.000E+00  7.696E-02   6.3E-01
   28   95  1.167E+02  0.000E+00  0.000E+00  0.000E+00  0.000E+00  0.000E+00  1.697E-01   0.0E+00
   28   96  1.163E+02  0.000E+00  0.000E+00  0.000E+00  0.000E+00  2.514E-01  0.000E+00   0.0E+00
   28   97  1.157E+02  5.708E+06  1.145E-05  1.308E-05  0.000E+00  0.000E+00  1.047E+00   6.4E-01
   28   98  1.145E+02  0.000E+00  0.000E+00  0.000E+00  1.541E+03  1.031E-03  0.000E+00   0.0E+00
   28  101  1.145E+02  0.000E+00  0.000E+00  0.000E+00  1.135E+03  9.443E-04  0.000E+00   0.0E+00
   28  102  1.144E+02  0.000E+00  0.000E+00  0.000E+00  7.467E+02  0.000E+00  0.000E+00   0.0E+00
   28  103  1.143E+02  0.000E+00  0.000E+00  0.000E+00  9.132E+01  5.122E-04  0.000E+00   0.0E+00
   28  104  1.143E+02  3.536E+01  1.155E-10  1.304E-10  0.000E+00  0.000E+00  2.539E-06   1.3E+00
   28  105  1.143E+02  0.000E+00  0.000E+00  0.000E+00  8.635E-01  0.000E+00  0.000E+00   0.0E+00
   28  106  1.143E+02  0.000E+00  0.000E+00  0.000E+00  0.000E+00  0.000E+00  1.763E-05   0.0E+00
   28  110  1.142E+02  0.000E+00  0.000E+00  0.000E+00  0.000E+00  0.000E+00  4.055E-06   0.0E+00
   28  114  1.121E+02  9.305E+05  2.920E-06  3.232E-06  0.000E+00  0.000E+00  3.770E-03   6.6E-01
   28  115  1.120E+02  5.404E+07  1.695E-04  1.875E-04  0.000E+00  0.000E+00  8.606E-01   6.5E-01
   28  116  1.119E+02  0.000E+00  0.000E+00  0.000E+00  0.000E+00  0.000E+00  8.838E-02   0.0E+00
   28  117  1.112E+02  1.222E+07  2.264E-05  2.486E-05  0.000E+00  0.000E+00  4.728E-03   6.5E-01
   28  118  1.097E+02  0.000E+00  0.000E+00  0.000E+00  3.602E+00  0.000E+00  0.000E+00   0.0E+00
   28  120  1.097E+02  0.000E+00  0.000E+00  0.000E+00  2.534E+03  0.000E+00  0.000E+00   0.0E+00
   28  121  1.096E+02  0.000E+00  0.000E+00  0.000E+00  1.014E+03  1.208E-03  0.000E+00   0.0E+00
   28  122  1.095E+02  0.000E+00  0.000E+00  0.000E+00  0.000E+00  0.000E+00  5.477E-07   0.0E+00
   29   31  6.617E+02  6.515E+07  1.283E-02  2.795E-02  0.000E+00  0.000E+00  0.000E+00   9.8E-01
   29   32  6.389E+02  0.000E+00  0.000E+00  0.000E+00  0.000E+00  0.000E+00  2.073E-01   0.0E+00
   29   33  5.895E+02  2.378E+09  3.717E-01  7.214E-01  0.000E+00  0.000E+00  0.000E+00   9.9E-01
   29   34  3.638E+02  0.000E+00  0.000E+00  0.000E+00  0.000E+00  0.000E+00  1.231E-01   0.0E+00
   29   35  3.600E+02  8.865E+07  5.166E-03  6.122E-03  0.000E+00  0.000E+00  0.000E+00   5.7E-01
   29   37  3.185E+02  6.970E+07  3.180E-03  3.334E-03  0.000E+00  0.000E+00  0.000E+00   5.8E-01
   29   38  2.915E+02  0.000E+00  0.000E+00  0.000E+00  0.000E+00  1.362E+00  0.000E+00   0.0E+00
   29   39  2.879E+02  0.000E+00  0.000E+00  0.000E+00  3.889E+01  0.000E+00  0.000E+00   0.0E+00
   29   41  2.839E+02  0.000E+00  0.000E+00  0.000E+00  0.000E+00  8.811E-01  0.000E+00   0.0E+00
   29   42  2.820E+02  0.000E+00  0.000E+00  0.000E+00  1.518E+01  0.000E+00  0.000E+00   0.0E+00
   29   44  2.628E+02  0.000E+00  0.000E+00  0.000E+00  0.000E+00  1.923E-01  0.000E+00   0.0E+00
   29   45  2.595E+02  0.000E+00  0.000E+00  0.000E+00  3.113E+02  0.000E+00  0.000E+00   0.0E+00
   29   46  2.571E+02  0.000E+00  0.000E+00  0.000E+00  0.000E+00  3.999E+00  0.000E+00   0.0E+00
   29   48  2.501E+02  0.000E+00  0.000E+00  0.000E+00  0.000E+00  1.339E-01  0.000E+00   0.0E+00
   29   49  2.501E+02  0.000E+00  0.000E+00  0.000E+00  3.073E+02  0.000E+00  0.000E+00   0.0E+00
   29   51  2.367E+02  0.000E+00  0.000E+00  0.000E+00  2.017E+05  0.000E+00  0.000E+00   0.0E+00
   29   53  2.284E+02  2.904E+06  6.812E-05  5.122E-05  0.000E+00  0.000E+00  0.000E+00   1.5E+00
   29   55  2.266E+02  0.000E+00  0.000E+00  0.000E+00  0.000E+00  0.000E+00  5.905E-01   0.0E+00
   29   57  2.242E+02  0.000E+00  0.000E+00  0.000E+00  0.000E+00  0.000E+00  8.720E-02   0.0E+00
   29   59  2.176E+02  2.380E+08  5.067E-03  3.629E-03  0.000E+00  0.000E+00  0.000E+00   1.4E+00
   29   62  2.083E+02  0.000E+00  0.000E+00  0.000E+00  0.000E+00  0.000E+00  3.141E-02   0.0E+00
   29   65  2.079E+02  0.000E+00  0.000E+00  0.000E+00  0.000E+00  0.000E+00  8.865E-02   0.0E+00
   29   67  2.067E+02  0.000E+00  0.000E+00  0.000E+00  2.642E+03  0.000E+00  0.000E+00   0.0E+00
   29   69  2.061E+02  0.000E+00  0.000E+00  0.000E+00  0.000E+00  1.065E-03  0.000E+00   0.0E+00
   29   70  2.061E+02  0.000E+00  0.000E+00  0.000E+00  3.259E+03  0.000E+00  0.000E+00   0.0E+00
   29   71  2.012E+02  5.999E+08  1.092E-02  7.234E-03  0.000E+00  0.000E+00  0.000E+00   1.4E+00
   29   74  1.921E+02  0.000E+00  0.000E+00  0.000E+00  2.771E+02  0.000E+00  0.000E+00   0.0E+00
   29   76  1.360E+02  0.000E+00  0.000E+00  0.000E+00  0.000E+00  0.000E+00  3.973E-01   0.0E+00
   29   77  1.356E+02  3.880E+07  3.212E-04  1.434E-04  0.000E+00  0.000E+00  0.000E+00   5.1E-02
   29   78  1.300E+02  0.000E+00  0.000E+00  0.000E+00  0.000E+00  4.597E-01  0.000E+00   0.0E+00
   29   79  1.295E+02  0.000E+00  0.000E+00  0.000E+00  1.098E+03  0.000E+00  0.000E+00   0.0E+00
   29   81  1.292E+02  0.000E+00  0.000E+00  0.000E+00  0.000E+00  9.071E-02  0.000E+00   0.0E+00
   29   83  1.290E+02  0.000E+00  0.000E+00  0.000E+00  1.029E+03  0.000E+00  0.000E+00   0.0E+00
   29   84  1.292E+02  3.198E+07  2.401E-04  1.021E-04  0.000E+00  0.000E+00  0.000E+00   1.1E-01
   29   86  1.236E+02  0.000E+00  0.000E+00  0.000E+00  0.000E+00  8.755E-04  0.000E+00   0.0E+00
   29   87  1.233E+02  0.000E+00  0.000E+00  0.000E+00  0.000E+00  5.018E-01  0.000E+00   0.0E+00
   29   88  1.232E+02  0.000E+00  0.000E+00  0.000E+00  1.925E+03  0.000E+00  0.000E+00   0.0E+00
   29   90  1.227E+02  1.009E+06  6.825E-06  2.756E-06  0.000E+00  0.000E+00  0.000E+00   1.5E+00
   29   92  1.224E+02  0.000E+00  0.000E+00  0.000E+00  0.000E+00  0.000E+00  5.707E-01   0.0E+00
   29   94  1.221E+02  0.000E+00  0.000E+00  0.000E+00  0.000E+00  0.000E+00  9.351E-02   0.0E+00
   29   97  1.209E+02  1.384E+08  9.095E-04  3.620E-04  0.000E+00  0.000E+00  0.000E+00   1.3E+00
   29   98  1.197E+02  0.000E+00  0.000E+00  0.000E+00  0.000E+00  3.617E-04  0.000E+00   0.0E+00
   29  101  1.196E+02  0.000E+00  0.000E+00  0.000E+00  9.210E+03  0.000E+00  0.000E+00   0.0E+00
   29  103  1.195E+02  0.000E+00  0.000E+00  0.000E+00  1.791E+04  0.000E+00  0.000E+00   0.0E+00
   29  104  1.194E+02  0.000E+00  0.000E+00  0.000E+00  0.000E+00  0.000E+00  1.765E-06   0.0E+00
   29  114  1.170E+02  0.000E+00  0.000E+00  0.000E+00  0.000E+00  0.000E+00  1.805E-02   0.0E+00
   29  115  1.169E+02  0.000E+00  0.000E+00  0.000E+00  0.000E+00  0.000E+00  1.738E-01   0.0E+00
   29  117  1.160E+02  1.902E+08  1.151E-03  4.394E-04  0.000E+00  0.000E+00  0.000E+00   1.2E+00
   29  121  1.143E+02  0.000E+00  0.000E+00  0.000E+00  1.178E+04  0.000E+00  0.000E+00   0.0E+00
   30   31  6.374E+04  0.000E+00  0.000E+00  0.000E+00  0.000E+00  6.659E-02  0.000E+00   0.0E+00
   30   32  1.437E+04  0.000E+00  0.000E+00  0.000E+00  1.118E-04  0.000E+00  0.000E+00   0.0E+00
   30   33  4.982E+03  0.000E+00  0.000E+00  0.000E+00  0.000E+00  5.609E+00  0.000E+00   0.0E+00
   30   34  7.977E+02  0.000E+00  0.000E+00  0.000E+00  1.036E+00  0.000E+00  0.000E+00   0.0E+00
   30   35  7.798E+02  0.000E+00  0.000E+00  0.000E+00  0.000E+00  8.430E+00  0.000E+00   0.0E+00
   30   37  6.081E+02  0.000E+00  0.000E+00  0.000E+00  0.000E+00  3.911E-03  0.000E+00   0.0E+00
   30   38  5.167E+02  8.987E+05  1.079E-04  1.836E-04  0.000E+00  0.000E+00  0.000E+00   8.6E+00
   30   39  5.057E+02  0.000E+00  0.000E+00  0.000E+00  0.000E+00  0.000E+00  5.683E-07   0.0E+00
   30   41  4.933E+02  4.350E+07  4.761E-03  7.731E-03  0.000E+00  0.000E+00  0.000E+00   1.1E+00
   30   42  4.875E+02  0.000E+00  0.000E+00  0.000E+00  0.000E+00  0.000E+00  1.668E-03   0.0E+00
   30   44  4.330E+02  1.255E+09  1.058E-01  1.508E-01  0.000E+00  0.000E+00  0.000E+00   9.8E-01
   30   45  4.240E+02  0.000E+00  0.000E+00  0.000E+00  0.000E+00  0.000E+00  1.530E-01   0.0E+00
   30   46  4.177E+02  1.320E+08  1.036E-02  1.425E-02  0.000E+00  0.000E+00  0.000E+00   8.5E-01
   30   48  3.995E+02  2.472E+09  1.775E-01  2.334E-01  0.000E+00  0.000E+00  0.000E+00   1.1E+00
   30   49  3.995E+02  0.000E+00  0.000E+00  0.000E+00  0.000E+00  0.000E+00  8.559E-03   0.0E+00
   30   51  3.664E+02  0.000E+00  0.000E+00  0.000E+00  0.000E+00  0.000E+00  9.722E-01   0.0E+00
   30   53  3.468E+02  0.000E+00  0.000E+00  0.000E+00  0.000E+00  5.799E-02  0.000E+00   0.0E+00
   30   55  3.428E+02  0.000E+00  0.000E+00  0.000E+00  1.205E+02  0.000E+00  0.000E+00   0.0E+00
   30   57  3.373E+02  0.000E+00  0.000E+00  0.000E+00  8.433E+01  0.000E+00  0.000E+00   0.0E+00
   30   59  3.225E+02  0.000E+00  0.000E+00  0.000E+00  0.000E+00  6.295E-06  0.000E+00   0.0E+00
   30   62  3.026E+02  0.000E+00  0.000E+00  0.000E+00  2.821E+03  0.000E+00  0.000E+00   0.0E+00
   30   65  3.017E+02  0.000E+00  0.000E+00  0.000E+00  2.304E+03  0.000E+00  0.000E+00   0.0E+00
   30   67  2.992E+02  0.000E+00  0.000E+00  0.000E+00  0.000E+00  0.000E+00  1.482E-01   0.0E+00
   30   69  2.980E+02  1.499E+09  5.988E-02  5.875E-02  0.000E+00  0.000E+00  0.000E+00   1.1E+00
   30   70  2.980E+02  0.000E+00  0.000E+00  0.000E+00  0.000E+00  0.000E+00  3.457E-01   0.0E+00
   30   71  2.878E+02  0.000E+00  0.000E+00  0.000E+00  0.000E+00  7.461E-01  0.000E+00   0.0E+00
   30   74  2.695E+02  0.000E+00  0.000E+00  0.000E+00  0.000E+00  0.000E+00  2.898E-02   0.0E+00
   30   76  1.707E+02  0.000E+00  0.000E+00  0.000E+00  9.693E+02  0.000E+00  0.000E+00   0.0E+00
   30   77  1.702E+02  0.000E+00  0.000E+00  0.000E+00  0.000E+00  1.132E+00  0.000E+00   0.0E+00
   30   78  1.613E+02  4.134E+07  4.840E-04  2.570E-04  0.000E+00  0.000E+00  0.000E+00   2.7E-01
   30   79  1.606E+02  0.000E+00  0.000E+00  0.000E+00  0.000E+00  0.000E+00  1.704E-03   0.0E+00
   30   81  1.601E+02  3.455E+06  3.982E-05  2.099E-05  0.000E+00  0.000E+00  0.000E+00   6.1E-01
   30   83  1.598E+02  0.000E+00  0.000E+00  0.000E+00  0.000E+00  0.000E+00  1.033E-02   0.0E+00
   30   84  1.601E+02  0.000E+00  0.000E+00  0.000E+00  0.000E+00  4.397E-02  0.000E+00   0.0E+00
   30   86  1.516E+02  1.352E+07  1.397E-04  6.969E-05  0.000E+00  0.000E+00  0.000E+00   2.8E+00
   30   87  1.512E+02  1.967E+07  2.022E-04  1.007E-04  0.000E+00  0.000E+00  0.000E+00   2.5E+00
   30   88  1.510E+02  0.000E+00  0.000E+00  0.000E+00  0.000E+00  0.000E+00  1.595E-02   0.0E+00
   30   90  1.502E+02  0.000E+00  0.000E+00  0.000E+00  0.000E+00  7.506E-02  0.000E+00   0.0E+00
   30   92  1.498E+02  0.000E+00  0.000E+00  0.000E+00  5.440E+02  0.000E+00  0.000E+00   0.0E+00
   30   94  1.494E+02  0.000E+00  0.000E+00  0.000E+00  7.681E+01  0.000E+00  0.000E+00   0.0E+00
   30   97  1.476E+02  0.000E+00  0.000E+00  0.000E+00  0.000E+00  5.182E-03  0.000E+00   0.0E+00
   30   98  1.457E+02  2.636E+08  2.517E-03  1.208E-03  0.000E+00  0.000E+00  0.000E+00   1.1E+00
   30  101  1.457E+02  0.000E+00  0.000E+00  0.000E+00  0.000E+00  0.000E+00  1.406E-01   0.0E+00
   30  103  1.454E+02  0.000E+00  0.000E+00  0.000E+00  0.000E+00  0.000E+00  7.239E-02   0.0E+00
   30  104  1.454E+02  0.000E+00  0.000E+00  0.000E+00  8.486E+03  0.000E+00  0.000E+00   0.0E+00
   30  114  1.418E+02  0.000E+00  0.000E+00  0.000E+00  4.581E+03  0.000E+00  0.000E+00   0.0E+00
   30  115  1.417E+02  0.000E+00  0.000E+00  0.000E+00  6.843E+03  0.000E+00  0.000E+00   0.0E+00
   30  117  1.403E+02  0.000E+00  0.000E+00  0.000E+00  0.000E+00  3.557E-02  0.000E+00   0.0E+00
   30  121  1.379E+02  0.000E+00  0.000E+00  0.000E+00  0.000E+00  0.000E+00  9.984E-03   0.0E+00
   31   32  1.855E+04  0.000E+00  0.000E+00  0.000E+00  6.746E-05  2.025E+00  0.000E+00   0.0E+00
   31   33  5.404E+03  0.000E+00  0.000E+00  0.000E+00  6.324E-03  3.195E+00  0.000E+00   0.0E+00
   31   34  8.078E+02  0.000E+00  0.000E+00  0.000E+00  2.191E+00  1.107E+01  0.000E+00   0.0E+00
   31   35  7.894E+02  0.000E+00  0.000E+00  0.000E+00  7.849E-01  1.991E+00  0.000E+00   0.0E+00
   31   36  6.207E+02  0.000E+00  0.000E+00  0.000E+00  0.000E+00  2.348E+01  0.000E+00   0.0E+00
   31   37  6.140E+02  0.000E+00  0.000E+00  0.000E+00  3.516E-01  3.174E+00  0.000E+00   0.0E+00
   31   38  5.209E+02  1.015E+06  4.131E-05  2.125E-04  0.000E+00  0.000E+00  8.361E-04   1.3E+01
   31   39  5.098E+02  2.456E+08  1.595E-02  8.029E-02  0.000E+00  0.000E+00  4.114E-03   9.6E-01
   31   40  5.098E+02  0.000E+00  0.000E+00  0.000E+00  0.000E+00  0.000E+00  3.408E-02   0.0E+00
   31   41  4.971E+02  1.414E+08  5.239E-03  2.572E-02  0.000E+00  0.000E+00  2.343E-04   8.8E-01
   31   42  4.913E+02  1.852E+07  1.117E-03  5.421E-03  0.000E+00  0.000E+00  2.772E-02   4.8E-01
   31   43  4.529E+02  1.429E+08  1.464E-03  6.550E-03  0.000E+00  0.000E+00  0.000E+00   5.5E-01
   31   44  4.360E+02  7.655E+08  2.182E-02  9.394E-02  0.000E+00  0.000E+00  1.243E-02   1.0E+00
   31   45  4.268E+02  1.332E+09  6.063E-02  2.556E-01  0.000E+00  0.000E+00  4.959E-01   9.8E-01
   31   46  4.204E+02  2.410E+06  6.385E-05  2.651E-04  0.000E+00  0.000E+00  3.956E-02   4.4E-01
   31   47  4.047E+02  0.000E+00  0.000E+00  0.000E+00  0.000E+00  0.000E+00  2.683E-01   0.0E+00
   31   48  4.020E+02  1.857E+09  4.500E-02  1.787E-01  0.000E+00  0.000E+00  1.408E-01   1.1E+00
   31   49  4.021E+02  3.477E+09  1.404E-01  5.577E-01  0.000E+00  0.000E+00  6.153E-01   1.1E+00
   31   50  3.735E+02  1.420E+05  9.900E-07  3.652E-06  0.000E+00  0.000E+00  0.000E+00   4.1E+01
   31   51  3.685E+02  3.781E+08  1.283E-02  4.670E-02  0.000E+00  0.000E+00  1.368E+00   1.0E+00
   31   52  3.512E+02  0.000E+00  0.000E+00  0.000E+00  0.000E+00  6.572E-01  0.000E+00   0.0E+00
   31   53  3.487E+02  0.000E+00  0.000E+00  0.000E+00  3.156E+02  6.862E-02  0.000E+00   0.0E+00
   31   55  3.447E+02  0.000E+00  0.000E+00  0.000E+00  9.715E+02  2.707E-01  0.000E+00   0.0E+00
   31   56  3.429E+02  0.000E+00  0.000E+00  0.000E+00  1.661E+03  0.000E+00  0.000E+00   0.0E+00
   31   57  3.391E+02  0.000E+00  0.000E+00  0.000E+00  1.529E+03  6.174E-02  0.000E+00   0.0E+00
   31   58  3.373E+02  0.000E+00  0.000E+00  0.000E+00  6.108E+02  0.000E+00  0.000E+00   0.0E+00
   31   59  3.241E+02  0.000E+00  0.000E+00  0.000E+00  3.158E+03  4.201E-02  0.000E+00   0.0E+00
   31   62  3.040E+02  0.000E+00  0.000E+00  0.000E+00  1.656E+03  4.523E-02  0.000E+00   0.0E+00
   31   63  3.025E+02  0.000E+00  0.000E+00  0.000E+00  0.000E+00  0.000E+00  8.993E-03   0.0E+00
   31   65  3.032E+02  0.000E+00  0.000E+00  0.000E+00  1.396E+03  2.079E-01  0.000E+00   0.0E+00
   31   66  3.020E+02  0.000E+00  0.000E+00  0.000E+00  2.727E+03  0.000E+00  0.000E+00   0.0E+00
   31   67  3.006E+02  5.182E+08  1.170E-02  3.474E-02  0.000E+00  0.000E+00  2.653E-02   1.1E+00
   31   68  3.004E+02  0.000E+00  0.000E+00  0.000E+00  0.000E+00  0.000E+00  5.857E-02   0.0E+00
   31   69  2.994E+02  1.060E+09  1.424E-02  4.211E-02  0.000E+00  0.000E+00  1.386E-01   1.1E+00
   31   70  2.994E+02  7.820E+08  1.751E-02  5.178E-02  0.000E+00  0.000E+00  1.481E+00   1.1E+00
   31   71  2.891E+02  0.000E+00  0.000E+00  0.000E+00  6.853E+02  7.962E-01  0.000E+00   0.0E+00
   31   72  2.728E+02  0.000E+00  0.000E+00  0.000E+00  0.000E+00  0.000E+00  6.464E-03   0.0E+00
   31   74  2.707E+02  5.991E+08  1.097E-02  2.932E-02  0.000E+00  0.000E+00  1.813E-02   1.1E+00
   31   75  2.705E+02  0.000E+00  0.000E+00  0.000E+00  0.000E+00  0.000E+00  1.603E-01   0.0E+00
   31   76  1.711E+02  0.000E+00  0.000E+00  0.000E+00  2.110E+03  7.517E-01  0.000E+00   0.0E+00
   31   77  1.706E+02  0.000E+00  0.000E+00  0.000E+00  1.578E+02  4.286E-01  0.000E+00   0.0E+00
   31   78  1.617E+02  1.054E+08  4.132E-04  6.600E-04  0.000E+00  0.000E+00  7.551E-02   3.4E-01
   31   79  1.610E+02  4.953E+07  3.207E-04  5.099E-04  0.000E+00  0.000E+00  8.648E-03   1.2E+00
   31   80  1.609E+02  0.000E+00  0.000E+00  0.000E+00  0.000E+00  0.000E+00  4.282E-02   0.0E+00
   31   81  1.605E+02  2.592E+07  1.001E-04  1.586E-04  0.000E+00  0.000E+00  6.328E-03   1.8E+00
   31   82  1.608E+02  0.000E+00  0.000E+00  0.000E+00  0.000E+00  1.276E+00  0.000E+00   0.0E+00
   31   83  1.602E+02  9.788E+05  6.279E-06  9.937E-06  0.000E+00  0.000E+00  3.647E-02   1.2E+01
   31   84  1.605E+02  0.000E+00  0.000E+00  0.000E+00  1.434E+03  2.632E-01  0.000E+00   0.0E+00
   31   85  1.573E+02  3.044E+06  3.765E-06  5.852E-06  0.000E+00  0.000E+00  0.000E+00   2.4E+00
   31   86  1.519E+02  3.568E+07  1.234E-04  1.852E-04  0.000E+00  0.000E+00  1.680E-02   1.5E+00
   31   87  1.516E+02  1.689E+07  5.817E-05  8.707E-05  0.000E+00  0.000E+00  6.716E-03   1.2E+00
   31   88  1.514E+02  9.977E+06  5.714E-05  8.545E-05  0.000E+00  0.000E+00  9.443E-02   4.2E+00
   31   89  1.508E+02  0.000E+00  0.000E+00  0.000E+00  0.000E+00  1.793E-01  0.000E+00   0.0E+00
   31   90  1.506E+02  0.000E+00  0.000E+00  0.000E+00  1.692E+03  1.369E-03  0.000E+00   0.0E+00
   31   92  1.502E+02  0.000E+00  0.000E+00  0.000E+00  5.377E+03  2.081E-01  0.000E+00   0.0E+00
   31   93  1.501E+02  0.000E+00  0.000E+00  0.000E+00  5.933E+03  0.000E+00  0.000E+00   0.0E+00
   31   94  1.497E+02  0.000E+00  0.000E+00  0.000E+00  6.252E+03  2.743E-04  0.000E+00   0.0E+00
   31   95  1.496E+02  0.000E+00  0.000E+00  0.000E+00  3.045E+03  0.000E+00  0.000E+00   0.0E+00
   31   96  1.491E+02  4.406E+06  4.892E-06  7.201E-06  0.000E+00  0.000E+00  0.000E+00   1.0E+01
   31   97  1.479E+02  0.000E+00  0.000E+00  0.000E+00  1.059E+04  1.711E-02  0.000E+00   0.0E+00
   31   98  1.461E+02  1.876E+08  6.001E-04  8.656E-04  0.000E+00  0.000E+00  8.056E-02   1.1E+00
   31  101  1.460E+02  2.090E+08  1.113E-03  1.605E-03  0.000E+00  0.000E+00  8.745E-01   1.1E+00
   31  102  1.458E+02  0.000E+00  0.000E+00  0.000E+00  0.000E+00  0.000E+00  5.959E-02   0.0E+00
   31  103  1.458E+02  3.785E+07  2.010E-04  2.894E-04  0.000E+00  0.000E+00  3.164E-02   1.1E+00
   31  104  1.458E+02  0.000E+00  0.000E+00  0.000E+00  7.960E+03  1.015E-05  0.000E+00   0.0E+00
   31  105  1.458E+02  0.000E+00  0.000E+00  0.000E+00  0.000E+00  0.000E+00  3.516E-03   0.0E+00
   31  106  1.457E+02  0.000E+00  0.000E+00  0.000E+00  3.127E+03  0.000E+00  0.000E+00   0.0E+00
   31  110  1.456E+02  0.000E+00  0.000E+00  0.000E+00  4.207E+03  0.000E+00  0.000E+00   0.0E+00
   31  114  1.421E+02  0.000E+00  0.000E+00  0.000E+00  3.732E+03  3.659E-04  0.000E+00   0.0E+00
   31  115  1.420E+02  0.000E+00  0.000E+00  0.000E+00  4.496E+03  1.255E-01  0.000E+00   0.0E+00
   31  116  1.419E+02  0.000E+00  0.000E+00  0.000E+00  5.512E+03  0.000E+00  0.000E+00   0.0E+00
   31  117  1.406E+02  0.000E+00  0.000E+00  0.000E+00  3.225E+03  8.393E-03  0.000E+00   0.0E+00
   31  118  1.383E+02  0.000E+00  0.000E+00  0.000E+00  0.000E+00  0.000E+00  1.419E-03   0.0E+00
   31  120  1.382E+02  0.000E+00  0.000E+00  0.000E+00  0.000E+00  0.000E+00  1.492E-01   0.0E+00
   31  121  1.382E+02  1.262E+08  6.023E-04  8.222E-04  0.000E+00  0.000E+00  3.434E-02   1.1E+00
   31  122  1.380E+02  0.000E+00  0.000E+00  0.000E+00  6.273E+03  0.000E+00  0.000E+00   0.0E+00
   32   33  7.625E+03  0.000E+00  0.000E+00  0.000E+00  3.908E-04  1.914E+00  0.000E+00   0.0E+00
   32   34  8.446E+02  0.000E+00  0.000E+00  0.000E+00  1.575E+00  9.984E-04  0.000E+00   0.0E+00
   32   35  8.245E+02  0.000E+00  0.000E+00  0.000E+00  1.190E+00  1.044E+00  0.000E+00   0.0E+00
   32   36  6.421E+02  0.000E+00  0.000E+00  0.000E+00  6.030E+00  0.000E+00  0.000E+00   0.0E+00
   32   37  6.350E+02  0.000E+00  0.000E+00  0.000E+00  2.958E+00  5.152E+01  0.000E+00   0.0E+00
   32   38  5.360E+02  8.900E+07  2.300E-03  2.029E-02  0.000E+00  0.000E+00  9.946E-03   1.3E+00
   32   39  5.242E+02  1.499E+08  6.173E-03  5.326E-02  0.000E+00  0.000E+00  8.593E-06   7.9E-01
   32   40  5.242E+02  5.828E+08  3.361E-02  2.900E-01  0.000E+00  0.000E+00  1.540E-01   8.9E-01
   32   41  5.108E+02  2.077E+07  4.875E-04  4.099E-03  0.000E+00  0.000E+00  3.415E-02   4.5E-01
   32   42  5.047E+02  9.652E+07  3.685E-03  3.061E-02  0.000E+00  0.000E+00  6.503E-02   5.5E-01
   32   43  4.642E+02  0.000E+00  0.000E+00  0.000E+00  0.000E+00  0.000E+00  1.333E-01   0.0E+00
   32   44  4.465E+02  3.148E+07  5.645E-04  4.149E-03  0.000E+00  0.000E+00  1.720E-03   1.2E+00
   32   45  4.369E+02  2.716E+08  7.771E-03  5.588E-02  0.000E+00  0.000E+00  2.072E-01   1.2E+00
   32   46  4.302E+02  3.180E+06  5.292E-05  3.748E-04  0.000E+00  0.000E+00  7.137E-04   6.2E-01
   32   47  4.137E+02  6.050E+09  2.174E-01  1.480E+00  0.000E+00  0.000E+00  4.057E+00   1.1E+00
   32   48  4.109E+02  1.320E+08  2.005E-03  1.356E-02  0.000E+00  0.000E+00  5.639E-04   1.1E+00
   32   49  4.110E+02  1.194E+09  3.024E-02  2.046E-01  0.000E+00  0.000E+00  3.696E-01   1.1E+00
   32   50  3.812E+02  0.000E+00  0.000E+00  0.000E+00  0.000E+00  0.000E+00  2.876E-01   0.0E+00
   32   51  3.760E+02  6.714E+03  1.423E-07  8.807E-07  0.000E+00  0.000E+00  1.528E+00   2.3E-01
   32   52  3.580E+02  0.000E+00  0.000E+00  0.000E+00  5.211E+03  0.000E+00  0.000E+00   0.0E+00
   32   53  3.554E+02  0.000E+00  0.000E+00  0.000E+00  4.834E+03  7.753E-01  0.000E+00   0.0E+00
   32   54  3.520E+02  0.000E+00  0.000E+00  0.000E+00  5.482E+03  0.000E+00  0.000E+00   0.0E+00
   32   55  3.512E+02  0.000E+00  0.000E+00  0.000E+00  3.384E+03  8.990E-02  0.000E+00   0.0E+00
   32   56  3.494E+02  0.000E+00  0.000E+00  0.000E+00  2.292E+03  5.418E-03  0.000E+00   0.0E+00
   32   57  3.454E+02  0.000E+00  0.000E+00  0.000E+00  1.187E+03  2.014E-02  0.000E+00   0.0E+00
   32   58  3.435E+02  0.000E+00  0.000E+00  0.000E+00  2.234E+03  6.654E-02  0.000E+00   0.0E+00
   32   59  3.299E+02  0.000E+00  0.000E+00  0.000E+00  1.035E+02  7.880E-01  0.000E+00   0.0E+00
   32   61  3.101E+02  0.000E+00  0.000E+00  0.000E+00  0.000E+00  0.000E+00  2.866E-05   0.0E+00
   32   62  3.091E+02  0.000E+00  0.000E+00  0.000E+00  8.868E-02  5.691E-03  0.000E+00   0.0E+00
   32   63  3.075E+02  2.476E+05  4.913E-06  2.487E-05  0.000E+00  0.000E+00  9.629E-04   1.1E+00
   32   64  3.073E+02  0.000E+00  0.000E+00  0.000E+00  0.000E+00  0.000E+00  1.666E-02   0.0E+00
   32   65  3.082E+02  0.000E+00  0.000E+00  0.000E+00  9.651E+00  3.065E-01  0.000E+00   0.0E+00
   32   66  3.069E+02  0.000E+00  0.000E+00  0.000E+00  1.932E-01  4.477E-02  0.000E+00   0.0E+00
   32   67  3.056E+02  8.993E+07  1.259E-03  6.332E-03  0.000E+00  0.000E+00  5.158E-02   1.1E+00
   32   68  3.053E+02  1.103E+09  2.159E-02  1.085E-01  0.000E+00  0.000E+00  1.347E+00   1.1E+00
   32   69  3.043E+02  6.883E+07  5.733E-04  2.872E-03  0.000E+00  0.000E+00  1.802E-03   1.1E+00
   32   70  3.043E+02  3.931E+08  5.457E-03  2.733E-02  0.000E+00  0.000E+00  1.212E+00   1.1E+00
   32   71  2.937E+02  0.000E+00  0.000E+00  0.000E+00  1.763E-03  7.743E-02  0.000E+00   0.0E+00
   32   72  2.768E+02  8.716E+04  1.402E-06  6.388E-06  0.000E+00  0.000E+00  8.574E-04   1.1E+00
   32   73  2.766E+02  0.000E+00  0.000E+00  0.000E+00  0.000E+00  0.000E+00  1.211E-02   0.0E+00
   32   74  2.747E+02  1.175E+08  1.329E-03  6.009E-03  0.000E+00  0.000E+00  4.713E-03   1.1E+00
   32   75  2.745E+02  1.179E+09  1.864E-02  8.424E-02  0.000E+00  0.000E+00  2.171E+00   1.1E+00
   32   76  1.727E+02  0.000E+00  0.000E+00  0.000E+00  1.706E+03  9.109E-03  0.000E+00   0.0E+00
   32   77  1.722E+02  0.000E+00  0.000E+00  0.000E+00  1.357E+03  1.091E-02  0.000E+00   0.0E+00
   32   78  1.632E+02  2.599E+08  6.224E-04  1.672E-03  0.000E+00  0.000E+00  5.491E-01   8.2E-01
   32   79  1.624E+02  2.185E+07  8.637E-05  2.309E-04  0.000E+00  0.000E+00  4.462E-07   2.7E+00
   32   80  1.623E+02  1.142E+08  6.314E-04  1.687E-03  0.000E+00  0.000E+00  4.548E-01   1.7E+00
   32   81  1.619E+02  8.471E+05  1.997E-06  5.322E-06  0.000E+00  0.000E+00  3.940E-02   3.5E+00
   32   82  1.622E+02  0.000E+00  0.000E+00  0.000E+00  6.289E+03  0.000E+00  0.000E+00   0.0E+00
   32   83  1.616E+02  2.142E+06  8.390E-06  2.232E-05  0.000E+00  0.000E+00  5.560E-02   1.8E+01
   32   84  1.619E+02  0.000E+00  0.000E+00  0.000E+00  3.014E+03  2.953E+00  0.000E+00   0.0E+00
   32   85  1.587E+02  0.000E+00  0.000E+00  0.000E+00  0.000E+00  0.000E+00  1.582E-01   0.0E+00
   32   86  1.532E+02  2.344E+06  4.946E-06  1.247E-05  0.000E+00  0.000E+00  2.478E-02   1.0E-01
   32   87  1.528E+02  8.364E+07  1.757E-04  4.419E-04  0.000E+00  0.000E+00  2.046E-01   2.0E-01
   32   88  1.526E+02  9.159E+06  3.200E-05  8.039E-05  0.000E+00  0.000E+00  1.001E-01   3.3E-01
   32   89  1.521E+02  0.000E+00  0.000E+00  0.000E+00  3.983E+04  0.000E+00  0.000E+00   0.0E+00
   32   90  1.518E+02  0.000E+00  0.000E+00  0.000E+00  3.457E+04  4.546E-01  0.000E+00   0.0E+00
   32   91  1.515E+02  0.000E+00  0.000E+00  0.000E+00  2.644E+04  0.000E+00  0.000E+00   0.0E+00
   32   92  1.514E+02  0.000E+00  0.000E+00  0.000E+00  2.144E+04  2.474E-03  0.000E+00   0.0E+00
   32   93  1.513E+02  0.000E+00  0.000E+00  0.000E+00  1.124E+04  1.858E-03  0.000E+00   0.0E+00
   32   94  1.509E+02  0.000E+00  0.000E+00  0.000E+00  5.650E+03  6.171E-04  0.000E+00   0.0E+00
   32   95  1.508E+02  0.000E+00  0.000E+00  0.000E+00  1.091E+04  6.311E-03  0.000E+00   0.0E+00
   32   96  1.502E+02  0.000E+00  0.000E+00  0.000E+00  0.000E+00  0.000E+00  6.179E-01   0.0E+00
   32   97  1.491E+02  0.000E+00  0.000E+00  0.000E+00  9.529E+01  8.918E-02  0.000E+00   0.0E+00
   32   98  1.472E+02  1.239E+07  2.416E-05  5.855E-05  0.000E+00  0.000E+00  1.440E-04   1.1E+00
   32  100  1.472E+02  0.000E+00  0.000E+00  0.000E+00  0.000E+00  0.000E+00  1.447E-05   0.0E+00
   32  101  1.472E+02  8.346E+07  2.710E-04  6.564E-04  0.000E+00  0.000E+00  6.084E-01   1.1E+00
   32  102  1.470E+02  2.144E+08  9.722E-04  2.352E-03  0.000E+00  0.000E+00  1.196E+00   1.1E+00
   32  103  1.469E+02  5.880E+06  1.903E-05  4.603E-05  0.000E+00  0.000E+00  5.033E-02   1.1E+00
   32  104  1.469E+02  0.000E+00  0.000E+00  0.000E+00  1.078E+03  1.650E-04  0.000E+00   0.0E+00
   32  105  1.469E+02  6.180E+05  2.799E-06  6.769E-06  0.000E+00  0.000E+00  6.995E-03   1.1E+00
   32  106  1.469E+02  0.000E+00  0.000E+00  0.000E+00  3.173E+03  4.217E-05  0.000E+00   0.0E+00
   32  107  1.469E+02  0.000E+00  0.000E+00  0.000E+00  0.000E+00  0.000E+00  4.308E-03   0.0E+00
   32  110  1.467E+02  0.000E+00  0.000E+00  0.000E+00  9.159E+02  3.781E-05  0.000E+00   0.0E+00
   32  111  1.467E+02  0.000E+00  0.000E+00  0.000E+00  7.058E+03  0.000E+00  0.000E+00   0.0E+00
   32  112  1.467E+02  0.000E+00  0.000E+00  0.000E+00  1.038E+01  0.000E+00  0.000E+00   0.0E+00
   32  114  1.432E+02  0.000E+00  0.000E+00  0.000E+00  1.239E+00  4.808E-03  0.000E+00   0.0E+00
   32  115  1.431E+02  0.000E+00  0.000E+00  0.000E+00  1.966E+02  5.351E-03  0.000E+00   0.0E+00
   32  116  1.429E+02  0.000E+00  0.000E+00  0.000E+00  3.108E+00  1.082E-03  0.000E+00   0.0E+00
   32  117  1.417E+02  0.000E+00  0.000E+00  0.000E+00  1.459E+02  3.345E-03  0.000E+00   0.0E+00
   32  118  1.394E+02  2.806E+05  1.144E-06  2.623E-06  0.000E+00  0.000E+00  3.391E-04   1.1E+00
   32  119  1.393E+02  0.000E+00  0.000E+00  0.000E+00  0.000E+00  0.000E+00  4.765E-03   0.0E+00
   32  120  1.393E+02  2.919E+08  1.188E-03  2.724E-03  0.000E+00  0.000E+00  2.055E+00   1.1E+00
   32  121  1.392E+02  2.882E+07  8.377E-05  1.920E-04  0.000E+00  0.000E+00  4.436E-05   1.1E+00
   32  122  1.391E+02  0.000E+00  0.000E+00  0.000E+00  1.484E+03  6.364E-05  0.000E+00   0.0E+00
   32  123  1.391E+02  0.000E+00  0.000E+00  0.000E+00  1.030E+04  0.000E+00  0.000E+00   0.0E+00
   32  124  1.390E+02  0.000E+00  0.000E+00  0.000E+00  8.023E+01  0.000E+00  0.000E+00   0.0E+00
   33   34  9.498E+02  0.000E+00  0.000E+00  0.000E+00  4.628E-02  7.516E-01  0.000E+00   0.0E+00
   33   35  9.244E+02  0.000E+00  0.000E+00  0.000E+00  4.545E-01  2.051E-01  0.000E+00   0.0E+00
   33   36  7.012E+02  0.000E+00  0.000E+00  0.000E+00  0.000E+00  1.020E-01  0.000E+00   0.0E+00
   33   37  6.927E+02  0.000E+00  0.000E+00  0.000E+00  2.180E+00  3.096E-02  0.000E+00   0.0E+00
   33   38  5.765E+02  1.270E+04  6.329E-07  3.603E-06  0.000E+00  0.000E+00  3.231E-04   6.9E+00
   33   39  5.628E+02  1.181E+07  9.351E-04  5.198E-03  0.000E+00  0.000E+00  1.115E-03   1.1E+00
   33   40  5.628E+02  0.000E+00  0.000E+00  0.000E+00  0.000E+00  0.000E+00  2.134E-02   0.0E+00
   33   41  5.475E+02  8.311E+05  3.735E-05  2.019E-04  0.000E+00  0.000E+00  2.536E-04   3.7E-02
   33   42  5.404E+02  3.287E+07  2.399E-03  1.280E-02  0.000E+00  0.000E+00  4.318E-03   1.1E+00
   33   43  4.943E+02  1.768E+07  2.158E-04  1.054E-03  0.000E+00  0.000E+00  0.000E+00   2.0E+00
   33   44  4.742E+02  3.075E+07  1.037E-03  4.856E-03  0.000E+00  0.000E+00  8.129E-03   1.2E+00
   33   45  4.634E+02  3.438E+08  1.845E-02  8.445E-02  0.000E+00  0.000E+00  2.421E-01   1.0E+00
   33   46  4.559E+02  9.690E+05  3.019E-05  1.359E-04  0.000E+00  0.000E+00  2.223E-03   1.8E+00
   33   47  4.375E+02  0.000E+00  0.000E+00  0.000E+00  0.000E+00  0.000E+00  1.111E+00   0.0E+00
   33   48  4.343E+02  5.769E+07  1.631E-03  6.998E-03  0.000E+00  0.000E+00  8.688E-03   1.1E+00
   33   49  4.344E+02  8.959E+06  4.224E-04  1.812E-03  0.000E+00  0.000E+00  2.981E-01   1.5E+00
   33   50  4.013E+02  3.480E+08  2.800E-03  1.110E-02  0.000E+00  0.000E+00  0.000E+00   1.3E+00
   33   51  3.955E+02  7.170E+09  2.802E-01  1.094E+00  0.000E+00  0.000E+00  1.868E+00   1.0E+00
   33   52  3.756E+02  0.000E+00  0.000E+00  0.000E+00  0.000E+00  2.779E-02  0.000E+00   0.0E+00
   33   53  3.728E+02  0.000E+00  0.000E+00  0.000E+00  3.873E-01  1.073E-01  0.000E+00   0.0E+00
   33   55  3.681E+02  0.000E+00  0.000E+00  0.000E+00  4.719E+00  5.798E-02  0.000E+00   0.0E+00
   33   56  3.661E+02  0.000E+00  0.000E+00  0.000E+00  6.571E+01  0.000E+00  0.000E+00   0.0E+00
   33   57  3.618E+02  0.000E+00  0.000E+00  0.000E+00  1.370E+00  1.696E-01  0.000E+00   0.0E+00
   33   58  3.597E+02  0.000E+00  0.000E+00  0.000E+00  1.387E+02  0.000E+00  0.000E+00   0.0E+00
   33   59  3.448E+02  0.000E+00  0.000E+00  0.000E+00  9.898E+01  2.369E-01  0.000E+00   0.0E+00
   33   62  3.222E+02  0.000E+00  0.000E+00  0.000E+00  1.172E+02  6.115E-02  0.000E+00   0.0E+00
   33   63  3.204E+02  0.000E+00  0.000E+00  0.000E+00  0.000E+00  0.000E+00  8.030E-03   0.0E+00
   33   65  3.212E+02  0.000E+00  0.000E+00  0.000E+00  1.055E+02  8.684E-01  0.000E+00   0.0E+00
   33   66  3.198E+02  0.000E+00  0.000E+00  0.000E+00  8.397E+02  0.000E+00  0.000E+00   0.0E+00
   33   67  3.183E+02  6.278E+08  1.589E-02  4.997E-02  0.000E+00  0.000E+00  1.247E-01   1.0E+00
   33   68  3.181E+02  0.000E+00  0.000E+00  0.000E+00  0.000E+00  0.000E+00  5.918E-01   0.0E+00
   33   69  3.170E+02  3.470E+07  5.227E-04  1.636E-03  0.000E+00  0.000E+00  1.375E-02   1.1E+00
   33   70  3.169E+02  1.415E+09  3.551E-02  1.111E-01  0.000E+00  0.000E+00  1.526E+00   1.1E+00
   33   71  3.054E+02  0.000E+00  0.000E+00  0.000E+00  1.626E+03  9.537E-02  0.000E+00   0.0E+00
   33   72  2.872E+02  0.000E+00  0.000E+00  0.000E+00  0.000E+00  0.000E+00  6.315E-03   0.0E+00
   33   74  2.850E+02  4.740E+08  9.618E-03  2.707E-02  0.000E+00  0.000E+00  7.036E-02   1.1E+00
   33   75  2.848E+02  0.000E+00  0.000E+00  0.000E+00  0.000E+00  0.000E+00  4.463E-01   0.0E+00
   33   76  1.767E+02  0.000E+00  0.000E+00  0.000E+00  7.541E+01  1.087E-01  0.000E+00   0.0E+00
   33   77  1.762E+02  0.000E+00  0.000E+00  0.000E+00  1.546E+03  5.630E-02  0.000E+00   0.0E+00
   33   78  1.667E+02  2.801E+06  1.167E-05  1.922E-05  0.000E+00  0.000E+00  2.494E-01   3.2E-01
   33   79  1.659E+02  1.141E+07  7.846E-05  1.286E-04  0.000E+00  0.000E+00  1.343E-04   9.1E-01
   33   80  1.659E+02  0.000E+00  0.000E+00  0.000E+00  0.000E+00  0.000E+00  9.293E-02   0.0E+00
   33   81  1.654E+02  6.263E+05  2.569E-06  4.196E-06  0.000E+00  0.000E+00  4.549E-03   7.1E-02
   33   82  1.657E+02  0.000E+00  0.000E+00  0.000E+00  0.000E+00  7.344E-02  0.000E+00   0.0E+00
   33   83  1.651E+02  1.779E+07  1.212E-04  1.976E-04  0.000E+00  0.000E+00  1.058E-02   7.8E-01
   33   84  1.654E+02  0.000E+00  0.000E+00  0.000E+00  4.850E+02  2.010E-02  0.000E+00   0.0E+00
   33   85  1.621E+02  8.135E+07  1.068E-04  1.709E-04  0.000E+00  0.000E+00  0.000E+00   2.0E+00
   33   86  1.563E+02  5.329E+06  1.952E-05  3.013E-05  0.000E+00  0.000E+00  1.000E-02   8.1E-01
   33   87  1.559E+02  2.620E+06  9.550E-06  1.471E-05  0.000E+00  0.000E+00  1.642E-01   6.8E-01
   33   88  1.558E+02  2.558E+07  1.551E-04  2.385E-04  0.000E+00  0.000E+00  1.234E-01   1.3E+00
   33   89  1.551E+02  0.000E+00  0.000E+00  0.000E+00  0.000E+00  5.644E-01  0.000E+00   0.0E+00
   33   90  1.549E+02  0.000E+00  0.000E+00  0.000E+00  5.957E+00  5.017E-02  0.000E+00   0.0E+00
   33   92  1.545E+02  0.000E+00  0.000E+00  0.000E+00  1.009E+00  9.064E-02  0.000E+00   0.0E+00
   33   93  1.543E+02  0.000E+00  0.000E+00  0.000E+00  4.754E+02  0.000E+00  0.000E+00   0.0E+00
   33   94  1.540E+02  0.000E+00  0.000E+00  0.000E+00  1.289E+02  7.241E-03  0.000E+00   0.0E+00
   33   95  1.538E+02  0.000E+00  0.000E+00  0.000E+00  6.232E+02  0.000E+00  0.000E+00   0.0E+00
   33   96  1.533E+02  1.957E+08  2.297E-04  3.478E-04  0.000E+00  0.000E+00  0.000E+00   1.4E+00
   33   97  1.521E+02  0.000E+00  0.000E+00  0.000E+00  1.840E+03  2.947E-02  0.000E+00   0.0E+00
   33   98  1.501E+02  6.726E+06  2.272E-05  3.369E-05  0.000E+00  0.000E+00  9.424E-03   1.1E+00
   33  101  1.501E+02  8.749E+07  4.922E-04  7.295E-04  0.000E+00  0.000E+00  6.518E-01   1.2E+00
   33  102  1.499E+02  0.000E+00  0.000E+00  0.000E+00  0.000E+00  0.000E+00  3.481E-01   0.0E+00
   33  103  1.498E+02  6.576E+07  3.688E-04  5.457E-04  0.000E+00  0.000E+00  7.828E-02   1.2E+00
   33  104  1.498E+02  0.000E+00  0.000E+00  0.000E+00  2.169E+02  2.860E-05  0.000E+00   0.0E+00
   33  105  1.498E+02  0.000E+00  0.000E+00  0.000E+00  0.000E+00  0.000E+00  2.702E-03   0.0E+00
   33  106  1.498E+02  0.000E+00  0.000E+00  0.000E+00  1.684E+04  0.000E+00  0.000E+00   0.0E+00
   33  110  1.496E+02  0.000E+00  0.000E+00  0.000E+00  7.377E+03  0.000E+00  0.000E+00   0.0E+00
   33  114  1.459E+02  0.000E+00  0.000E+00  0.000E+00  7.847E+02  4.081E-03  0.000E+00   0.0E+00
   33  115  1.459E+02  0.000E+00  0.000E+00  0.000E+00  7.761E+02  9.789E-05  0.000E+00   0.0E+00
   33  116  1.457E+02  0.000E+00  0.000E+00  0.000E+00  2.382E+03  0.000E+00  0.000E+00   0.0E+00
   33  117  1.444E+02  0.000E+00  0.000E+00  0.000E+00  5.485E+03  7.491E-02  0.000E+00   0.0E+00
   33  118  1.419E+02  0.000E+00  0.000E+00  0.000E+00  0.000E+00  0.000E+00  2.203E-04   0.0E+00
   33  120  1.419E+02  0.000E+00  0.000E+00  0.000E+00  0.000E+00  0.000E+00  4.423E-01   0.0E+00
   33  121  1.418E+02  5.076E+07  2.551E-04  3.574E-04  0.000E+00  0.000E+00  1.092E-02   1.2E+00
   33  122  1.416E+02  0.000E+00  0.000E+00  0.000E+00  9.593E+03  0.000E+00  0.000E+00   0.0E+00
   34   35  3.464E+04  0.000E+00  0.000E+00  0.000E+00  5.910E-09  2.137E-01  0.000E+00   0.0E+00
   34   36  2.679E+03  0.000E+00  0.000E+00  0.000E+00  6.358E-03  0.000E+00  0.000E+00   0.0E+00
   34   37  2.559E+03  0.000E+00  0.000E+00  0.000E+00  3.468E-03  8.107E+02  0.000E+00   0.0E+00
   34   38  1.467E+03  5.348E+08  1.035E-01  2.499E+00  0.000E+00  0.000E+00  1.121E-02   1.0E+00
   34   39  1.382E+03  2.742E+08  7.844E-02  1.784E+00  0.000E+00  0.000E+00  2.364E-04   1.0E+00
   34   40  1.382E+03  6.590E+08  2.640E-01  6.003E+00  0.000E+00  0.000E+00  1.537E-02   1.1E+00
   34   41  1.293E+03  5.732E+07  8.614E-03  1.833E-01  0.000E+00  0.000E+00  3.018E-02   9.5E-01
   34   42  1.254E+03  5.440E+08  1.282E-01  2.647E+00  0.000E+00  0.000E+00  4.461E-02   9.7E-01
   34   43  1.031E+03  0.000E+00  0.000E+00  0.000E+00  0.000E+00  0.000E+00  1.257E-01   0.0E+00
   34   44  9.472E+02  3.522E+06  2.842E-04  4.431E-03  0.000E+00  0.000E+00  2.839E-03   8.3E-01
   34   45  9.050E+02  4.329E+07  5.316E-03  7.919E-02  0.000E+00  0.000E+00  4.852E-04   8.6E-01
   34   46  8.767E+02  5.511E+07  3.810E-03  5.499E-02  0.000E+00  0.000E+00  3.337E-03   8.2E-01
   34   47  8.110E+02  2.193E+08  3.027E-02  4.041E-01  0.000E+00  0.000E+00  2.008E-02   1.1E+00
   34   48  8.003E+02  1.968E+06  1.133E-04  1.493E-03  0.000E+00  0.000E+00  7.185E-04   1.3E+00
   34   49  8.005E+02  2.869E+07  2.756E-03  3.631E-02  0.000E+00  0.000E+00  8.707E-05   1.2E+00
   34   50  6.948E+02  0.000E+00  0.000E+00  0.000E+00  0.000E+00  0.000E+00  3.791E-01   0.0E+00
   34   51  6.777E+02  2.806E+03  1.932E-07  2.155E-06  0.000E+00  0.000E+00  1.084E-02   4.2E+00
   34   52  6.213E+02  0.000E+00  0.000E+00  0.000E+00  2.342E+04  0.000E+00  0.000E+00   0.0E+00
   34   53  6.136E+02  0.000E+00  0.000E+00  0.000E+00  2.381E+04  1.067E+00  0.000E+00   0.0E+00
   34   54  6.035E+02  0.000E+00  0.000E+00  0.000E+00  2.689E+04  0.000E+00  0.000E+00   0.0E+00
   34   55  6.012E+02  0.000E+00  0.000E+00  0.000E+00  1.944E+04  3.822E-02  0.000E+00   0.0E+00
   34   56  5.958E+02  0.000E+00  0.000E+00  0.000E+00  1.316E+04  5.470E-03  0.000E+00   0.0E+00
   34   57  5.845E+02  0.000E+00  0.000E+00  0.000E+00  8.538E+03  7.117E-03  0.000E+00   0.0E+00
   34   58  5.790E+02  0.000E+00  0.000E+00  0.000E+00  1.755E+04  3.809E-02  0.000E+00   0.0E+00
   34   59  5.413E+02  0.000E+00  0.000E+00  0.000E+00  1.793E+03  2.208E+00  0.000E+00   0.0E+00
   34   61  4.899E+02  0.000E+00  0.000E+00  0.000E+00  0.000E+00  0.000E+00  9.743E-08   0.0E+00
   34   62  4.876E+02  0.000E+00  0.000E+00  0.000E+00  1.194E+02  3.394E-03  0.000E+00   0.0E+00
   34   63  4.835E+02  1.347E+03  6.606E-08  5.257E-07  0.000E+00  0.000E+00  1.360E-05   1.1E+00
   34   64  4.830E+02  0.000E+00  0.000E+00  0.000E+00  0.000E+00  0.000E+00  6.582E-05   0.0E+00
   34   65  4.853E+02  0.000E+00  0.000E+00  0.000E+00  1.390E+03  1.635E-01  0.000E+00   0.0E+00
   34   66  4.822E+02  0.000E+00  0.000E+00  0.000E+00  4.903E+02  3.129E-02  0.000E+00   0.0E+00
   34   67  4.788E+02  4.320E+05  1.485E-05  1.170E-04  0.000E+00  0.000E+00  3.848E-04   1.1E+00
   34   68  4.782E+02  5.499E+06  2.640E-04  2.078E-03  0.000E+00  0.000E+00  1.753E-03   1.1E+00
   34   69  4.757E+02  3.232E+05  6.580E-06  5.152E-05  0.000E+00  0.000E+00  1.893E-04   1.1E+00
   34   70  4.756E+02  1.904E+06  6.457E-05  5.055E-04  0.000E+00  0.000E+00  1.218E-03   1.1E+00
   34   71  4.502E+02  0.000E+00  0.000E+00  0.000E+00  3.103E+02  1.456E+00  0.000E+00   0.0E+00
   34   72  4.118E+02  4.316E+01  1.536E-09  1.041E-08  0.000E+00  0.000E+00  6.274E-06   1.5E+00
   34   73  4.113E+02  0.000E+00  0.000E+00  0.000E+00  0.000E+00  0.000E+00  3.701E-05   0.0E+00
   34   74  4.071E+02  3.300E+05  8.200E-06  5.495E-05  0.000E+00  0.000E+00  3.329E-04   1.1E+00
   34   75  4.067E+02  3.333E+06  1.157E-04  7.745E-04  0.000E+00  0.000E+00  1.043E-03   1.1E+00
   34   76  2.171E+02  0.000E+00  0.000E+00  0.000E+00  2.764E+02  7.122E-02  0.000E+00   0.0E+00
   34   77  2.163E+02  0.000E+00  0.000E+00  0.000E+00  2.171E+02  5.912E-01  0.000E+00   0.0E+00
   34   78  2.022E+02  1.175E+10  4.324E-02  1.439E-01  0.000E+00  0.000E+00  1.010E+01   9.7E-01
   34   79  2.010E+02  4.940E+09  2.994E-02  9.907E-02  0.000E+00  0.000E+00  6.135E-02   9.9E-01
   34   80  2.009E+02  1.100E+10  9.325E-02  3.084E-01  0.000E+00  0.000E+00  1.162E+01   9.7E-01
   34   81  2.003E+02  7.321E+08  2.642E-03  8.709E-03  0.000E+00  0.000E+00  1.487E+01   1.0E+00
   34   82  2.007E+02  0.000E+00  0.000E+00  0.000E+00  2.039E+03  0.000E+00  0.000E+00   0.0E+00
   34   83  1.999E+02  5.618E+09  3.365E-02  1.107E-01  0.000E+00  0.000E+00  1.965E+01   1.0E+00
   34   84  2.003E+02  0.000E+00  0.000E+00  0.000E+00  1.041E+03  1.843E-02  0.000E+00   0.0E+00
   34   85  1.954E+02  0.000E+00  0.000E+00  0.000E+00  0.000E+00  0.000E+00  1.817E+01   0.0E+00
   34   86  1.871E+02  1.246E+04  3.923E-08  1.208E-07  0.000E+00  0.000E+00  2.560E-02   9.5E-01
   34   87  1.866E+02  9.332E+05  2.921E-06  8.971E-06  0.000E+00  0.000E+00  9.370E-02   9.2E+00
   34   88  1.863E+02  1.116E+06  5.807E-06  1.781E-05  0.000E+00  0.000E+00  9.962E-04   3.4E+00
   34   89  1.854E+02  0.000E+00  0.000E+00  0.000E+00  2.544E+06  0.000E+00  0.000E+00   0.0E+00
   34   90  1.851E+02  0.000E+00  0.000E+00  0.000E+00  2.459E+06  1.939E-02  0.000E+00   0.0E+00
   34   91  1.847E+02  0.000E+00  0.000E+00  0.000E+00  2.492E+06  0.000E+00  0.000E+00   0.0E+00
   34   92  1.845E+02  0.000E+00  0.000E+00  0.000E+00  1.799E+06  5.024E-03  0.000E+00   0.0E+00
   34   93  1.843E+02  0.000E+00  0.000E+00  0.000E+00  1.143E+06  1.568E-04  0.000E+00   0.0E+00
   34   94  1.838E+02  0.000E+00  0.000E+00  0.000E+00  6.461E+05  3.538E-04  0.000E+00   0.0E+00
   34   95  1.835E+02  0.000E+00  0.000E+00  0.000E+00  1.279E+06  4.381E-03  0.000E+00   0.0E+00
   34   96  1.828E+02  0.000E+00  0.000E+00  0.000E+00  0.000E+00  0.000E+00  1.254E-01   0.0E+00
   34   97  1.811E+02  0.000E+00  0.000E+00  0.000E+00  4.566E+04  3.573E-01  0.000E+00   0.0E+00
   34   98  1.783E+02  4.381E+05  1.253E-06  3.677E-06  0.000E+00  0.000E+00  8.337E-04   1.0E+00
   34  100  1.783E+02  0.000E+00  0.000E+00  0.000E+00  0.000E+00  0.000E+00  1.048E-05   0.0E+00
   34  101  1.782E+02  2.893E+06  1.378E-05  4.041E-05  0.000E+00  0.000E+00  2.491E-02   1.0E+00
   34  102  1.779E+02  7.295E+06  4.848E-05  1.420E-04  0.000E+00  0.000E+00  3.075E-02   1.0E+00
   34  103  1.779E+02  2.009E+05  9.528E-07  2.790E-06  0.000E+00  0.000E+00  1.955E-03   1.0E+00
   34  104  1.778E+02  0.000E+00  0.000E+00  0.000E+00  1.371E+02  4.725E-08  0.000E+00   0.0E+00
   34  105  1.778E+02  2.063E+04  1.370E-07  4.009E-07  0.000E+00  0.000E+00  1.064E-03   1.0E+00
   34  106  1.778E+02  0.000E+00  0.000E+00  0.000E+00  4.317E+02  1.217E-07  0.000E+00   0.0E+00
   34  107  1.778E+02  0.000E+00  0.000E+00  0.000E+00  0.000E+00  0.000E+00  3.891E-03   0.0E+00
   34  110  1.776E+02  0.000E+00  0.000E+00  0.000E+00  9.437E+01  9.936E-07  0.000E+00   0.0E+00
   34  111  1.776E+02  0.000E+00  0.000E+00  0.000E+00  8.160E+02  0.000E+00  0.000E+00   0.0E+00
   34  112  1.775E+02  0.000E+00  0.000E+00  0.000E+00  1.027E+00  0.000E+00  0.000E+00   0.0E+00
   34  114  1.724E+02  0.000E+00  0.000E+00  0.000E+00  2.584E+02  8.774E-05  0.000E+00   0.0E+00
   34  115  1.723E+02  0.000E+00  0.000E+00  0.000E+00  6.175E+03  1.021E-02  0.000E+00   0.0E+00
   34  116  1.721E+02  0.000E+00  0.000E+00  0.000E+00  1.813E+03  2.690E-03  0.000E+00   0.0E+00
   34  117  1.703E+02  0.000E+00  0.000E+00  0.000E+00  1.834E+03  2.094E-01  0.000E+00   0.0E+00
   34  118  1.669E+02  6.298E+03  3.682E-08  1.011E-07  0.000E+00  0.000E+00  3.970E-05   1.1E+00
   34  119  1.669E+02  0.000E+00  0.000E+00  0.000E+00  0.000E+00  0.000E+00  1.215E-03   0.0E+00
   34  120  1.668E+02  5.775E+06  3.371E-05  9.254E-05  0.000E+00  0.000E+00  4.838E-02   1.0E+00
   34  121  1.667E+02  5.805E+05  2.419E-06  6.640E-06  0.000E+00  0.000E+00  5.143E-04   1.0E+00
   34  122  1.665E+02  0.000E+00  0.000E+00  0.000E+00  1.116E+02  3.501E-07  0.000E+00   0.0E+00
   34  123  1.664E+02  0.000E+00  0.000E+00  0.000E+00  7.618E+02  0.000E+00  0.000E+00   0.0E+00
   34  124  1.664E+02  0.000E+00  0.000E+00  0.000E+00  5.229E+00  0.000E+00  0.000E+00   0.0E+00
   35   36  2.903E+03  0.000E+00  0.000E+00  0.000E+00  0.000E+00  8.652E+02  0.000E+00   0.0E+00
   35   37  2.763E+03  0.000E+00  0.000E+00  0.000E+00  1.017E-03  1.522E+02  0.000E+00   0.0E+00
   35   38  1.532E+03  3.660E+07  1.288E-02  1.948E-01  0.000E+00  0.000E+00  9.706E-04   1.1E+00
   35   39  1.439E+03  3.552E+08  1.838E-01  2.612E+00  0.000E+00  0.000E+00  6.274E-05   1.1E+00
   35   40  1.439E+03  0.000E+00  0.000E+00  0.000E+00  0.000E+00  0.000E+00  1.931E-02   0.0E+00
   35   41  1.343E+03  6.832E+08  1.846E-01  2.448E+00  0.000E+00  0.000E+00  2.977E-03   1.1E+00
   35   42  1.301E+03  3.458E+08  1.462E-01  1.879E+00  0.000E+00  0.000E+00  1.590E-02   1.0E+00
   35   43  1.062E+03  1.224E+09  6.907E-02  7.247E-01  0.000E+00  0.000E+00  0.000E+00   8.7E-01
   35   44  9.738E+02  2.274E+07  3.233E-03  3.109E-02  0.000E+00  0.000E+00  1.260E-04   1.0E+00
   35   45  9.293E+02  2.774E+06  5.985E-04  5.493E-03  0.000E+00  0.000E+00  6.927E-05   1.2E+00
   35   46  8.995E+02  8.560E+03  1.038E-06  9.224E-06  0.000E+00  0.000E+00  3.436E-03   3.0E+01
   35   47  8.305E+02  0.000E+00  0.000E+00  0.000E+00  0.000E+00  0.000E+00  1.449E-02   0.0E+00
   35   48  8.192E+02  2.373E+07  2.388E-03  1.932E-02  0.000E+00  0.000E+00  1.275E-04   1.1E+00
   35   49  8.194E+02  6.098E+07  1.023E-02  8.279E-02  0.000E+00  0.000E+00  4.060E-04   1.1E+00
   35   50  7.090E+02  1.424E+09  3.578E-02  2.506E-01  0.000E+00  0.000E+00  0.000E+00   7.1E-01
   35   51  6.912E+02  6.704E+07  8.003E-03  5.463E-02  0.000E+00  0.000E+00  3.088E-03   1.0E+00
   35   52  6.326E+02  0.000E+00  0.000E+00  0.000E+00  0.000E+00  2.981E+00  0.000E+00   0.0E+00
   35   53  6.247E+02  0.000E+00  0.000E+00  0.000E+00  7.283E+02  8.428E-01  0.000E+00   0.0E+00
   35   55  6.118E+02  0.000E+00  0.000E+00  0.000E+00  6.852E+03  2.256E-02  0.000E+00   0.0E+00
   35   56  6.062E+02  0.000E+00  0.000E+00  0.000E+00  1.448E+04  0.000E+00  0.000E+00   0.0E+00
   35   57  5.945E+02  0.000E+00  0.000E+00  0.000E+00  2.064E+04  1.838E-01  0.000E+00   0.0E+00
   35   58  5.889E+02  0.000E+00  0.000E+00  0.000E+00  1.431E+04  0.000E+00  0.000E+00   0.0E+00
   35   59  5.499E+02  0.000E+00  0.000E+00  0.000E+00  3.958E+04  1.528E-03  0.000E+00   0.0E+00
   35   62  4.945E+02  0.000E+00  0.000E+00  0.000E+00  1.107E+02  9.586E-02  0.000E+00   0.0E+00
   35   63  4.903E+02  0.000E+00  0.000E+00  0.000E+00  0.000E+00  0.000E+00  5.089E-04   0.0E+00
   35   65  4.922E+02  0.000E+00  0.000E+00  0.000E+00  6.926E+01  5.243E-01  0.000E+00   0.0E+00
   35   66  4.890E+02  0.000E+00  0.000E+00  0.000E+00  2.598E+01  0.000E+00  0.000E+00   0.0E+00
   35   67  4.855E+02  1.052E+05  6.197E-06  2.971E-05  0.000E+00  0.000E+00  6.398E-04   9.2E-01
   35   68  4.849E+02  0.000E+00  0.000E+00  0.000E+00  0.000E+00  0.000E+00  1.592E-04   0.0E+00
   35   69  4.823E+02  1.718E+06  5.990E-05  2.853E-04  0.000E+00  0.000E+00  1.238E-04   1.1E+00
   35   70  4.822E+02  3.344E+06  1.943E-04  9.255E-04  0.000E+00  0.000E+00  4.709E-03   1.1E+00
   35   71  4.561E+02  0.000E+00  0.000E+00  0.000E+00  1.265E+04  1.392E+00  0.000E+00   0.0E+00
   35   72  4.167E+02  0.000E+00  0.000E+00  0.000E+00  0.000E+00  0.000E+00  3.472E-04   0.0E+00
   35   74  4.119E+02  2.902E+05  1.231E-05  5.007E-05  0.000E+00  0.000E+00  1.152E-03   1.1E+00
   35   75  4.115E+02  0.000E+00  0.000E+00  0.000E+00  0.000E+00  0.000E+00  8.292E-06   0.0E+00
   35   76  2.185E+02  0.000E+00  0.000E+00  0.000E+00  1.391E+02  2.521E-01  0.000E+00   0.0E+00
   35   77  2.177E+02  0.000E+00  0.000E+00  0.000E+00  3.101E+03  2.804E-02  0.000E+00   0.0E+00
   35   78  2.034E+02  1.026E+09  6.365E-03  1.279E-02  0.000E+00  0.000E+00  1.708E+00   9.0E-01
   35   79  2.022E+02  6.476E+09  6.617E-02  1.321E-01  0.000E+00  0.000E+00  2.755E-02   9.7E-01
   35   80  2.021E+02  0.000E+00  0.000E+00  0.000E+00  0.000E+00  0.000E+00  1.832E+01   0.0E+00
   35   81  2.014E+02  1.026E+10  6.241E-02  1.242E-01  0.000E+00  0.000E+00  1.783E+00   9.6E-01
   35   82  2.019E+02  0.000E+00  0.000E+00  0.000E+00  0.000E+00  8.282E-01  0.000E+00   0.0E+00
   35   83  2.010E+02  4.751E+09  4.798E-02  9.526E-02  0.000E+00  0.000E+00  8.654E+00   9.9E-01
   35   84  2.015E+02  0.000E+00  0.000E+00  0.000E+00  5.595E+03  6.922E-02  0.000E+00   0.0E+00
   35   85  1.965E+02  6.820E+09  1.316E-02  2.554E-02  0.000E+00  0.000E+00  0.000E+00   1.2E+00
   35   86  1.881E+02  5.445E+06  2.889E-05  5.366E-05  0.000E+00  0.000E+00  3.849E-04   1.4E+00
   35   87  1.876E+02  6.671E+06  3.518E-05  6.518E-05  0.000E+00  0.000E+00  3.340E-02   1.5E+00
   35   88  1.873E+02  1.385E+07  1.215E-04  2.247E-04  0.000E+00  0.000E+00  3.480E-02   1.1E+00
   35   89  1.864E+02  0.000E+00  0.000E+00  0.000E+00  0.000E+00  1.235E-01  0.000E+00   0.0E+00
   35   90  1.860E+02  0.000E+00  0.000E+00  0.000E+00  4.979E+04  7.337E-02  0.000E+00   0.0E+00
   35   92  1.855E+02  0.000E+00  0.000E+00  0.000E+00  6.680E+05  6.169E-03  0.000E+00   0.0E+00
   35   93  1.853E+02  0.000E+00  0.000E+00  0.000E+00  1.344E+06  0.000E+00  0.000E+00   0.0E+00
   35   94  1.848E+02  0.000E+00  0.000E+00  0.000E+00  1.772E+06  2.643E-02  0.000E+00   0.0E+00
   35   95  1.845E+02  0.000E+00  0.000E+00  0.000E+00  1.131E+06  0.000E+00  0.000E+00   0.0E+00
   35   96  1.837E+02  6.618E+06  1.117E-05  2.026E-05  0.000E+00  0.000E+00  0.000E+00   1.6E+01
   35   97  1.820E+02  0.000E+00  0.000E+00  0.000E+00  2.206E+06  1.978E-02  0.000E+00   0.0E+00
   35   98  1.792E+02  2.510E+06  1.209E-05  2.139E-05  0.000E+00  0.000E+00  6.673E-03   1.0E+00
   35  101  1.791E+02  1.733E+05  1.389E-06  2.458E-06  0.000E+00  0.000E+00  5.652E-03   1.4E+00
   35  102  1.789E+02  0.000E+00  0.000E+00  0.000E+00  0.000E+00  0.000E+00  2.443E-02   0.0E+00
   35  103  1.788E+02  1.286E+07  1.027E-04  1.814E-04  0.000E+00  0.000E+00  6.460E-03   1.1E+00
   35  104  1.788E+02  0.000E+00  0.000E+00  0.000E+00  3.677E+02  8.539E-06  0.000E+00   0.0E+00
   35  105  1.788E+02  0.000E+00  0.000E+00  0.000E+00  0.000E+00  0.000E+00  1.182E-02   0.0E+00
   35  106  1.787E+02  0.000E+00  0.000E+00  0.000E+00  3.423E+03  0.000E+00  0.000E+00   0.0E+00
   35  110  1.785E+02  0.000E+00  0.000E+00  0.000E+00  4.806E+03  0.000E+00  0.000E+00   0.0E+00
   35  114  1.733E+02  0.000E+00  0.000E+00  0.000E+00  4.980E+02  3.238E-03  0.000E+00   0.0E+00
   35  115  1.732E+02  0.000E+00  0.000E+00  0.000E+00  4.347E+02  5.964E-02  0.000E+00   0.0E+00
   35  116  1.729E+02  0.000E+00  0.000E+00  0.000E+00  4.140E+03  0.000E+00  0.000E+00   0.0E+00
   35  117  1.711E+02  0.000E+00  0.000E+00  0.000E+00  2.013E+04  1.960E-01  0.000E+00   0.0E+00
   35  118  1.677E+02  0.000E+00  0.000E+00  0.000E+00  0.000E+00  0.000E+00  2.300E-03   0.0E+00
   35  120  1.676E+02  0.000E+00  0.000E+00  0.000E+00  0.000E+00  0.000E+00  4.618E-03   0.0E+00
   35  121  1.675E+02  7.447E+06  5.223E-05  8.642E-05  0.000E+00  0.000E+00  9.035E-03   1.1E+00
   35  122  1.673E+02  0.000E+00  0.000E+00  0.000E+00  4.289E+03  0.000E+00  0.000E+00   0.0E+00
   36   37  5.732E+04  0.000E+00  0.000E+00  0.000E+00  0.000E+00  5.812E-02  0.000E+00   0.0E+00
   36   38  3.242E+03  5.113E+05  2.417E-03  2.580E-02  0.000E+00  0.000E+00  0.000E+00   2.0E+00
   36   39  2.853E+03  0.000E+00  0.000E+00  0.000E+00  0.000E+00  0.000E+00  2.729E-06   0.0E+00
   36   41  2.498E+03  3.963E+05  1.112E-03  9.146E-03  0.000E+00  0.000E+00  0.000E+00   2.2E+00
   36   42  2.357E+03  0.000E+00  0.000E+00  0.000E+00  0.000E+00  0.000E+00  9.297E-07   0.0E+00
   36   44  1.465E+03  2.367E+08  2.286E-01  1.102E+00  0.000E+00  0.000E+00  0.000E+00   1.1E+00
   36   45  1.367E+03  0.000E+00  0.000E+00  0.000E+00  0.000E+00  0.000E+00  1.278E-02   0.0E+00
   36   46  1.303E+03  3.209E+08  2.451E-01  1.052E+00  0.000E+00  0.000E+00  0.000E+00   9.9E-01
   36   48  1.141E+03  2.551E+08  1.494E-01  5.613E-01  0.000E+00  0.000E+00  0.000E+00   1.1E+00
   36   49  1.142E+03  0.000E+00  0.000E+00  0.000E+00  0.000E+00  0.000E+00  9.754E-03   0.0E+00
   36   51  9.071E+02  0.000E+00  0.000E+00  0.000E+00  0.000E+00  0.000E+00  3.872E-03   0.0E+00
   36   53  7.960E+02  0.000E+00  0.000E+00  0.000E+00  0.000E+00  2.395E-02  0.000E+00   0.0E+00
   36   55  7.751E+02  0.000E+00  0.000E+00  0.000E+00  8.358E+01  0.000E+00  0.000E+00   0.0E+00
   36   57  7.477E+02  0.000E+00  0.000E+00  0.000E+00  4.727E+01  0.000E+00  0.000E+00   0.0E+00
   36   59  6.785E+02  0.000E+00  0.000E+00  0.000E+00  0.000E+00  2.281E-01  0.000E+00   0.0E+00
   36   62  5.960E+02  0.000E+00  0.000E+00  0.000E+00  1.457E+04  0.000E+00  0.000E+00   0.0E+00
   36   65  5.927E+02  0.000E+00  0.000E+00  0.000E+00  1.410E+04  0.000E+00  0.000E+00   0.0E+00
   36   67  5.830E+02  0.000E+00  0.000E+00  0.000E+00  0.000E+00  0.000E+00  1.468E-06   0.0E+00
   36   69  5.784E+02  2.786E+06  4.192E-04  7.983E-04  0.000E+00  0.000E+00  0.000E+00   1.1E+00
   36   70  5.783E+02  0.000E+00  0.000E+00  0.000E+00  0.000E+00  0.000E+00  7.960E-04   0.0E+00
   36   71  5.412E+02  0.000E+00  0.000E+00  0.000E+00  0.000E+00  2.041E+00  0.000E+00   0.0E+00
   36   74  4.800E+02  0.000E+00  0.000E+00  0.000E+00  0.000E+00  0.000E+00  3.224E-05   0.0E+00
   36   76  2.363E+02  0.000E+00  0.000E+00  0.000E+00  1.308E+02  0.000E+00  0.000E+00   0.0E+00
   36   77  2.353E+02  0.000E+00  0.000E+00  0.000E+00  0.000E+00  3.444E-02  0.000E+00   0.0E+00
   36   78  2.187E+02  9.957E+07  2.143E-03  1.543E-03  0.000E+00  0.000E+00  0.000E+00   7.5E-01
   36   79  2.174E+02  0.000E+00  0.000E+00  0.000E+00  0.000E+00  0.000E+00  1.679E-02   0.0E+00
   36   81  2.165E+02  5.371E+06  1.132E-04  8.066E-05  0.000E+00  0.000E+00  0.000E+00   5.7E-01
   36   83  2.160E+02  0.000E+00  0.000E+00  0.000E+00  0.000E+00  0.000E+00  3.647E-04   0.0E+00
   36   84  2.165E+02  0.000E+00  0.000E+00  0.000E+00  0.000E+00  1.737E-03  0.000E+00   0.0E+00
   36   86  2.011E+02  3.977E+09  7.236E-02  4.791E-02  0.000E+00  0.000E+00  0.000E+00   9.8E-01
   36   87  2.005E+02  7.143E+09  1.292E-01  8.527E-02  0.000E+00  0.000E+00  0.000E+00   9.9E-01
   36   88  2.002E+02  0.000E+00  0.000E+00  0.000E+00  0.000E+00  0.000E+00  1.159E+01   0.0E+00
   36   90  1.988E+02  0.000E+00  0.000E+00  0.000E+00  0.000E+00  7.569E-04  0.000E+00   0.0E+00
   36   92  1.981E+02  0.000E+00  0.000E+00  0.000E+00  8.534E+03  0.000E+00  0.000E+00   0.0E+00
   36   94  1.973E+02  0.000E+00  0.000E+00  0.000E+00  3.371E+03  0.000E+00  0.000E+00   0.0E+00
   36   97  1.942E+02  0.000E+00  0.000E+00  0.000E+00  0.000E+00  1.651E-01  0.000E+00   0.0E+00
   36   98  1.910E+02  1.455E+07  2.387E-04  1.501E-04  0.000E+00  0.000E+00  0.000E+00   1.0E+00
   36  101  1.909E+02  0.000E+00  0.000E+00  0.000E+00  0.000E+00  0.000E+00  1.877E-03   0.0E+00
   36  103  1.905E+02  0.000E+00  0.000E+00  0.000E+00  0.000E+00  0.000E+00  7.118E-03   0.0E+00
   36  104  1.905E+02  0.000E+00  0.000E+00  0.000E+00  7.247E+02  0.000E+00  0.000E+00   0.0E+00
   36  114  1.843E+02  0.000E+00  0.000E+00  0.000E+00  1.144E+06  0.000E+00  0.000E+00   0.0E+00
   36  115  1.842E+02  0.000E+00  0.000E+00  0.000E+00  1.329E+06  0.000E+00  0.000E+00   0.0E+00
   36  117  1.818E+02  0.000E+00  0.000E+00  0.000E+00  0.000E+00  2.822E-01  0.000E+00   0.0E+00
   36  121  1.778E+02  0.000E+00  0.000E+00  0.000E+00  0.000E+00  0.000E+00  6.534E-06   0.0E+00
   37   38  3.437E+03  5.445E+05  9.640E-04  3.272E-02  0.000E+00  0.000E+00  1.483E-05   1.7E+00
   37   39  3.002E+03  3.862E+04  8.696E-05  2.578E-03  0.000E+00  0.000E+00  3.501E-06   3.7E+00
   37   40  3.002E+03  0.000E+00  0.000E+00  0.000E+00  0.000E+00  0.000E+00  2.050E-06   0.0E+00
   37   41  2.612E+03  9.337E+04  9.548E-05  2.463E-03  0.000E+00  0.000E+00  9.440E-07   1.9E-01
   37   42  2.458E+03  6.834E+05  1.032E-03  2.506E-02  0.000E+00  0.000E+00  2.161E-09   1.9E+00
   37   43  1.726E+03  7.842E+07  1.168E-02  1.990E-01  0.000E+00  0.000E+00  0.000E+00   1.2E+00
   37   44  1.504E+03  1.752E+08  5.939E-02  8.821E-01  0.000E+00  0.000E+00  1.145E-03   1.1E+00
   37   45  1.400E+03  4.940E+08  2.420E-01  3.346E+00  0.000E+00  0.000E+00  1.644E-02   1.0E+00
   37   46  1.334E+03  4.556E+08  1.214E-01  1.600E+00  0.000E+00  0.000E+00  4.348E-02   1.0E+00
   37   47  1.187E+03  0.000E+00  0.000E+00  0.000E+00  0.000E+00  0.000E+00  2.332E-05   0.0E+00
   37   48  1.164E+03  8.478E+07  1.723E-02  1.982E-01  0.000E+00  0.000E+00  3.633E-03   1.1E+00
   37   49  1.165E+03  2.875E+08  9.747E-02  1.121E+00  0.000E+00  0.000E+00  1.456E-02   1.1E+00
   37   50  9.538E+02  1.760E+09  7.998E-02  7.534E-01  0.000E+00  0.000E+00  0.000E+00   8.0E-01
   37   51  9.217E+02  6.602E+07  1.401E-02  1.276E-01  0.000E+00  0.000E+00  6.137E-03   1.0E+00
   37   52  8.205E+02  0.000E+00  0.000E+00  0.000E+00  0.000E+00  1.655E-01  0.000E+00   0.0E+00
   37   53  8.072E+02  0.000E+00  0.000E+00  0.000E+00  7.673E+01  1.704E-01  0.000E+00   0.0E+00
   37   55  7.857E+02  0.000E+00  0.000E+00  0.000E+00  6.418E+01  1.604E-01  0.000E+00   0.0E+00
   37   56  7.766E+02  0.000E+00  0.000E+00  0.000E+00  6.281E+00  0.000E+00  0.000E+00   0.0E+00
   37   57  7.575E+02  0.000E+00  0.000E+00  0.000E+00  2.836E+00  5.178E-02  0.000E+00   0.0E+00
   37   58  7.484E+02  0.000E+00  0.000E+00  0.000E+00  6.447E+01  0.000E+00  0.000E+00   0.0E+00
   37   59  6.866E+02  0.000E+00  0.000E+00  0.000E+00  9.897E+02  2.759E-01  0.000E+00   0.0E+00
   37   62  6.023E+02  0.000E+00  0.000E+00  0.000E+00  1.319E+04  1.236E-02  0.000E+00   0.0E+00
   37   63  5.961E+02  0.000E+00  0.000E+00  0.000E+00  0.000E+00  0.000E+00  6.854E-05   0.0E+00
   37   65  5.989E+02  0.000E+00  0.000E+00  0.000E+00  1.399E+04  1.696E+00  0.000E+00   0.0E+00
   37   66  5.941E+02  0.000E+00  0.000E+00  0.000E+00  2.932E+04  0.000E+00  0.000E+00   0.0E+00
   37   67  5.890E+02  6.389E+05  5.538E-05  3.221E-04  0.000E+00  0.000E+00  7.974E-05   1.2E+00
   37   68  5.881E+02  0.000E+00  0.000E+00  0.000E+00  0.000E+00  0.000E+00  8.473E-04   0.0E+00
   37   69  5.843E+02  1.209E+06  6.189E-05  3.572E-04  0.000E+00  0.000E+00  8.812E-05   1.1E+00
   37   70  5.842E+02  8.863E+05  7.558E-05  4.361E-04  0.000E+00  0.000E+00  2.033E-05   1.1E+00
   37   71  5.463E+02  0.000E+00  0.000E+00  0.000E+00  4.265E+04  5.347E-01  0.000E+00   0.0E+00
   37   72  4.908E+02  0.000E+00  0.000E+00  0.000E+00  0.000E+00  0.000E+00  5.584E-05   0.0E+00
   37   74  4.841E+02  1.463E+06  8.565E-05  4.095E-04  0.000E+00  0.000E+00  5.580E-05   1.1E+00
   37   75  4.835E+02  0.000E+00  0.000E+00  0.000E+00  0.000E+00  0.000E+00  1.342E-04   0.0E+00
   37   76  2.373E+02  0.000E+00  0.000E+00  0.000E+00  1.808E+02  1.967E-01  0.000E+00   0.0E+00
   37   77  2.363E+02  0.000E+00  0.000E+00  0.000E+00  2.282E+03  3.444E-05  0.000E+00   0.0E+00
   37   78  2.196E+02  1.176E+08  8.498E-04  1.843E-03  0.000E+00  0.000E+00  5.074E-01   8.0E-01
   37   79  2.182E+02  1.612E+06  1.918E-05  4.133E-05  0.000E+00  0.000E+00  3.518E-02   1.6E+00
   37   80  2.181E+02  0.000E+00  0.000E+00  0.000E+00  0.000E+00  0.000E+00  1.048E-01   0.0E+00
   37   81  2.173E+02  7.816E+06  5.533E-05  1.187E-04  0.000E+00  0.000E+00  2.430E-02   4.2E-01
   37   82  2.178E+02  0.000E+00  0.000E+00  0.000E+00  0.000E+00  1.507E-02  0.000E+00   0.0E+00
   37   83  2.168E+02  4.491E+07  5.275E-04  1.129E-03  0.000E+00  0.000E+00  2.289E-02   7.6E-01
   37   84  2.173E+02  0.000E+00  0.000E+00  0.000E+00  6.618E+02  3.897E-04  0.000E+00   0.0E+00
   37   85  2.116E+02  1.284E+09  2.871E-03  5.998E-03  0.000E+00  0.000E+00  0.000E+00   7.9E-01
   37   86  2.018E+02  7.590E+09  4.636E-02  9.242E-02  0.000E+00  0.000E+00  1.633E-02   9.6E-01
   37   87  2.012E+02  4.049E+09  2.458E-02  4.884E-02  0.000E+00  0.000E+00  2.961E+01   9.7E-01
   37   88  2.009E+02  1.090E+10  1.100E-01  2.183E-01  0.000E+00  0.000E+00  1.752E+01   9.8E-01
   37   89  1.999E+02  0.000E+00  0.000E+00  0.000E+00  0.000E+00  1.894E-02  0.000E+00   0.0E+00
   37   90  1.995E+02  0.000E+00  0.000E+00  0.000E+00  1.133E+04  1.124E-02  0.000E+00   0.0E+00
   37   92  1.988E+02  0.000E+00  0.000E+00  0.000E+00  3.540E+03  1.330E-05  0.000E+00   0.0E+00
   37   93  1.986E+02  0.000E+00  0.000E+00  0.000E+00  2.219E+01  0.000E+00  0.000E+00   0.0E+00
   37   94  1.980E+02  0.000E+00  0.000E+00  0.000E+00  6.681E+02  8.142E-03  0.000E+00   0.0E+00
   37   95  1.977E+02  0.000E+00  0.000E+00  0.000E+00  9.898E+03  0.000E+00  0.000E+00   0.0E+00
   37   96  1.968E+02  7.035E+09  1.362E-02  2.648E-02  0.000E+00  0.000E+00  0.000E+00   1.2E+00
   37   97  1.949E+02  0.000E+00  0.000E+00  0.000E+00  4.553E+04  9.466E-02  0.000E+00   0.0E+00
   37   98  1.916E+02  6.857E+06  3.776E-05  7.147E-05  0.000E+00  0.000E+00  4.789E-04   1.0E+00
   37  101  1.916E+02  2.982E+07  2.734E-04  5.173E-04  0.000E+00  0.000E+00  1.176E-01   1.0E+00
   37  102  1.912E+02  0.000E+00  0.000E+00  0.000E+00  0.000E+00  0.000E+00  4.443E-02   0.0E+00
   37  103  1.912E+02  6.294E+06  5.747E-05  1.085E-04  0.000E+00  0.000E+00  3.125E-02   1.1E+00
   37  104  1.911E+02  0.000E+00  0.000E+00  0.000E+00  4.430E+02  9.623E-06  0.000E+00   0.0E+00
   37  105  1.911E+02  0.000E+00  0.000E+00  0.000E+00  0.000E+00  0.000E+00  3.531E-03   0.0E+00
   37  106  1.911E+02  0.000E+00  0.000E+00  0.000E+00  4.679E+03  0.000E+00  0.000E+00   0.0E+00
   37  110  1.908E+02  0.000E+00  0.000E+00  0.000E+00  7.910E+02  0.000E+00  0.000E+00   0.0E+00
   37  114  1.849E+02  0.000E+00  0.000E+00  0.000E+00  1.340E+06  3.526E-04  0.000E+00   0.0E+00
   37  115  1.848E+02  0.000E+00  0.000E+00  0.000E+00  1.131E+06  8.825E-02  0.000E+00   0.0E+00
   37  116  1.845E+02  0.000E+00  0.000E+00  0.000E+00  2.469E+06  0.000E+00  0.000E+00   0.0E+00
   37  117  1.824E+02  0.000E+00  0.000E+00  0.000E+00  2.288E+06  7.435E-02  0.000E+00   0.0E+00
   37  118  1.785E+02  0.000E+00  0.000E+00  0.000E+00  0.000E+00  0.000E+00  3.959E-04   0.0E+00
   37  120  1.784E+02  0.000E+00  0.000E+00  0.000E+00  0.000E+00  0.000E+00  1.179E-03   0.0E+00
   37  121  1.784E+02  8.923E+05  7.092E-06  1.249E-05  0.000E+00  0.000E+00  9.139E-04   1.2E+00
   37  122  1.780E+02  0.000E+00  0.000E+00  0.000E+00  1.325E+03  0.000E+00  0.000E+00   0.0E+00
   38   39  2.374E+04  0.000E+00  0.000E+00  0.000E+00  5.305E-05  4.119E-02  0.000E+00   0.0E+00
   38   40  2.374E+04  0.000E+00  0.000E+00  0.000E+00  1.807E-04  0.000E+00  0.000E+00   0.0E+00
   38   41  1.088E+04  0.000E+00  0.000E+00  0.000E+00  5.293E-04  8.782E-02  0.000E+00   0.0E+00
   38   42  8.636E+03  0.000E+00  0.000E+00  0.000E+00  9.884E-04  2.906E+00  0.000E+00   0.0E+00
   38   43  3.468E+03  0.000E+00  0.000E+00  0.000E+00  0.000E+00  2.153E+02  0.000E+00   0.0E+00
   38   44  2.674E+03  0.000E+00  0.000E+00  0.000E+00  1.237E-03  3.076E+01  0.000E+00   0.0E+00
   38   45  2.363E+03  0.000E+00  0.000E+00  0.000E+00  1.050E-01  1.831E+01  0.000E+00   0.0E+00
   38   46  2.179E+03  0.000E+00  0.000E+00  0.000E+00  1.774E-03  2.664E+02  0.000E+00   0.0E+00
   38   47  1.814E+03  0.000E+00  0.000E+00  0.000E+00  8.198E+00  0.000E+00  0.000E+00   0.0E+00
   38   48  1.761E+03  0.000E+00  0.000E+00  0.000E+00  9.655E+00  4.710E+00  0.000E+00   0.0E+00
   38   49  1.762E+03  0.000E+00  0.000E+00  0.000E+00  8.013E+00  5.659E+00  0.000E+00   0.0E+00
   38   50  1.320E+03  0.000E+00  0.000E+00  0.000E+00  0.000E+00  6.296E+02  0.000E+00   0.0E+00
   38   51  1.260E+03  0.000E+00  0.000E+00  0.000E+00  3.430E-01  4.924E-01  0.000E+00   0.0E+00
   38   52  1.078E+03  1.569E+09  9.109E-02  9.696E-01  0.000E+00  0.000E+00  0.000E+00   1.0E+00
   38   53  1.055E+03  1.329E+09  2.217E-01  2.310E+00  0.000E+00  0.000E+00  2.884E-02   1.0E+00
   38   55  1.019E+03  7.602E+08  1.971E-01  1.983E+00  0.000E+00  0.000E+00  2.415E-02   1.0E+00
   38   56  1.003E+03  0.000E+00  0.000E+00  0.000E+00  0.000E+00  0.000E+00  3.278E-03   0.0E+00
   38   57  9.717E+02  2.630E+07  6.205E-03  5.955E-02  0.000E+00  0.000E+00  1.500E-02   1.0E+00
   38   58  9.567E+02  0.000E+00  0.000E+00  0.000E+00  0.000E+00  0.000E+00  1.064E-02   0.0E+00
   38   59  8.580E+02  8.992E+05  9.924E-05  8.409E-04  0.000E+00  0.000E+00  3.062E-01   3.6E-01
   38   62  7.303E+02  2.850E+05  3.799E-05  2.740E-04  0.000E+00  0.000E+00  1.588E-03   8.6E-01
   38   63  7.212E+02  0.000E+00  0.000E+00  0.000E+00  1.327E+02  0.000E+00  0.000E+00   0.0E+00
   38   65  7.253E+02  7.329E+06  9.634E-04  6.901E-03  0.000E+00  0.000E+00  1.126E-02   8.8E-01
   38   66  7.183E+02  0.000E+00  0.000E+00  0.000E+00  0.000E+00  0.000E+00  4.087E-03   0.0E+00
   38   67  7.108E+02  0.000E+00  0.000E+00  0.000E+00  1.648E+03  7.748E-05  0.000E+00   0.0E+00
   38   68  7.096E+02  0.000E+00  0.000E+00  0.000E+00  2.353E+03  0.000E+00  0.000E+00   0.0E+00
   38   69  7.040E+02  0.000E+00  0.000E+00  0.000E+00  7.586E+03  2.881E-02  0.000E+00   0.0E+00
   38   70  7.038E+02  0.000E+00  0.000E+00  0.000E+00  3.674E+03  2.073E-02  0.000E+00   0.0E+00
   38   71  6.496E+02  1.310E+07  8.289E-04  5.318E-03  0.000E+00  0.000E+00  2.214E-01   5.7E-01
   38   72  5.725E+02  0.000E+00  0.000E+00  0.000E+00  2.048E-02  0.000E+00  0.000E+00   0.0E+00
   38   74  5.635E+02  0.000E+00  0.000E+00  0.000E+00  1.895E+02  1.061E-02  0.000E+00   0.0E+00
   38   75  5.627E+02  0.000E+00  0.000E+00  0.000E+00  5.099E+02  0.000E+00  0.000E+00   0.0E+00
   38   76  2.549E+02  6.541E+09  1.062E-01  2.673E-01  0.000E+00  0.000E+00  4.012E+00   1.0E+00
   38   77  2.538E+02  8.352E+08  8.062E-03  2.021E-02  0.000E+00  0.000E+00  1.172E+00   1.1E+00
   38   78  2.346E+02  0.000E+00  0.000E+00  0.000E+00  6.972E+03  1.051E+00  0.000E+00   0.0E+00
   38   79  2.330E+02  0.000E+00  0.000E+00  0.000E+00  2.052E+05  9.865E-01  0.000E+00   0.0E+00
   38   80  2.328E+02  0.000E+00  0.000E+00  0.000E+00  6.531E+05  0.000E+00  0.000E+00   0.0E+00
   38   81  2.320E+02  0.000E+00  0.000E+00  0.000E+00  4.589E+04  8.714E+00  0.000E+00   0.0E+00
   38   82  2.325E+02  4.503E+08  1.216E-03  2.793E-03  0.000E+00  0.000E+00  0.000E+00   1.2E+00
   38   83  2.314E+02  0.000E+00  0.000E+00  0.000E+00  1.903E+04  8.153E+00  0.000E+00   0.0E+00
   38   84  2.320E+02  2.264E+08  1.827E-03  4.187E-03  0.000E+00  0.000E+00  8.587E-01   1.1E+00
   38   85  2.254E+02  0.000E+00  0.000E+00  0.000E+00  0.000E+00  3.801E+00  0.000E+00   0.0E+00
   38   86  2.144E+02  0.000E+00  0.000E+00  0.000E+00  1.472E+04  8.226E-02  0.000E+00   0.0E+00
   38   87  2.137E+02  0.000E+00  0.000E+00  0.000E+00  1.931E+03  3.119E-01  0.000E+00   0.0E+00
   38   88  2.134E+02  0.000E+00  0.000E+00  0.000E+00  7.210E+03  1.446E-01  0.000E+00   0.0E+00
   38   89  2.123E+02  1.855E+10  4.177E-02  8.758E-02  0.000E+00  0.000E+00  0.000E+00   9.8E-01
   38   90  2.118E+02  1.399E+10  9.408E-02  1.968E-01  0.000E+00  0.000E+00  6.133E+00   1.0E+00
   38   92  2.110E+02  6.989E+09  7.775E-02  1.620E-01  0.000E+00  0.000E+00  4.765E+00   1.0E+00
   38   93  2.108E+02  0.000E+00  0.000E+00  0.000E+00  0.000E+00  0.000E+00  6.518E-01   0.0E+00
   38   94  2.101E+02  1.813E+08  1.999E-03  4.148E-03  0.000E+00  0.000E+00  2.423E+00   9.7E-01
   38   95  2.098E+02  0.000E+00  0.000E+00  0.000E+00  0.000E+00  0.000E+00  1.547E+00   0.0E+00
   38   96  2.088E+02  0.000E+00  0.000E+00  0.000E+00  0.000E+00  9.274E+00  0.000E+00   0.0E+00
   38   97  2.066E+02  5.771E+07  3.692E-04  7.533E-04  0.000E+00  0.000E+00  2.534E+01   1.2E+00
   38   98  2.030E+02  0.000E+00  0.000E+00  0.000E+00  4.291E+06  1.051E-02  0.000E+00   0.0E+00
   38  101  2.029E+02  0.000E+00  0.000E+00  0.000E+00  2.597E+06  7.012E-04  0.000E+00   0.0E+00
   38  102  2.025E+02  0.000E+00  0.000E+00  0.000E+00  1.466E+06  0.000E+00  0.000E+00   0.0E+00
   38  103  2.024E+02  0.000E+00  0.000E+00  0.000E+00  4.555E+05  6.136E-04  0.000E+00   0.0E+00
   38  104  2.024E+02  6.988E+05  7.151E-06  1.429E-05  0.000E+00  0.000E+00  5.816E-04   1.1E+00
   38  105  2.024E+02  0.000E+00  0.000E+00  0.000E+00  3.862E+04  0.000E+00  0.000E+00   0.0E+00
   38  106  2.024E+02  0.000E+00  0.000E+00  0.000E+00  0.000E+00  0.000E+00  4.514E-04   0.0E+00
   38  110  2.020E+02  0.000E+00  0.000E+00  0.000E+00  0.000E+00  0.000E+00  6.160E-04   0.0E+00
   38  114  1.954E+02  1.547E+06  1.475E-05  2.846E-05  0.000E+00  0.000E+00  5.539E-03   1.1E+00
   38  115  1.952E+02  1.487E+08  1.417E-03  2.732E-03  0.000E+00  0.000E+00  6.187E-01   1.1E+00
   38  116  1.949E+02  0.000E+00  0.000E+00  0.000E+00  0.000E+00  0.000E+00  7.672E-02   0.0E+00
   38  117  1.926E+02  1.644E+07  9.145E-05  1.740E-04  0.000E+00  0.000E+00  2.933E-01   6.0E-01
   38  118  1.883E+02  0.000E+00  0.000E+00  0.000E+00  6.524E+00  0.000E+00  0.000E+00   0.0E+00
   38  120  1.882E+02  0.000E+00  0.000E+00  0.000E+00  9.088E+04  0.000E+00  0.000E+00   0.0E+00
   38  121  1.881E+02  0.000E+00  0.000E+00  0.000E+00  2.839E+04  3.137E-03  0.000E+00   0.0E+00
   38  122  1.878E+02  0.000E+00  0.000E+00  0.000E+00  0.000E+00  0.000E+00  2.553E-06   0.0E+00
   39   40  2.272E+08  0.000E+00  0.000E+00  0.000E+00  1.180E-24  8.918E-13  0.000E+00   0.0E+00
   39   41  2.008E+04  0.000E+00  0.000E+00  0.000E+00  4.682E-04  1.140E+00  0.000E+00   0.0E+00
   39   42  1.357E+04  0.000E+00  0.000E+00  0.000E+00  3.428E-03  1.177E+00  0.000E+00   0.0E+00
   39   43  4.061E+03  0.000E+00  0.000E+00  0.000E+00  2.131E+00  0.000E+00  0.000E+00   0.0E+00
   39   44  3.013E+03  0.000E+00  0.000E+00  0.000E+00  1.004E-01  4.856E+02  0.000E+00   0.0E+00
   39   45  2.624E+03  0.000E+00  0.000E+00  0.000E+00  8.390E-02  1.191E+00  0.000E+00   0.0E+00
   39   46  2.399E+03  0.000E+00  0.000E+00  0.000E+00  5.815E-02  3.546E+01  0.000E+00   0.0E+00
   39   47  1.964E+03  0.000E+00  0.000E+00  0.000E+00  3.857E-01  5.320E-02  0.000E+00   0.0E+00
   39   48  1.902E+03  0.000E+00  0.000E+00  0.000E+00  4.616E-01  2.205E+02  0.000E+00   0.0E+00
   39   49  1.903E+03  0.000E+00  0.000E+00  0.000E+00  6.248E-01  4.874E-01  0.000E+00   0.0E+00
   39   50  1.398E+03  0.000E+00  0.000E+00  0.000E+00  9.501E+01  0.000E+00  0.000E+00   0.0E+00
   39   51  1.330E+03  0.000E+00  0.000E+00  0.000E+00  2.920E+00  2.364E-01  0.000E+00   0.0E+00
   39   52  1.129E+03  0.000E+00  0.000E+00  0.000E+00  0.000E+00  0.000E+00  3.960E-03   0.0E+00
   39   53  1.104E+03  1.073E+08  1.177E-02  2.138E-01  0.000E+00  0.000E+00  5.017E-03   1.3E+00
   39   54  1.072E+03  0.000E+00  0.000E+00  0.000E+00  0.000E+00  0.000E+00  4.899E-02   0.0E+00
   39   55  1.064E+03  9.358E+07  1.589E-02  2.784E-01  0.000E+00  0.000E+00  9.895E-03   8.7E-01
   39   56  1.048E+03  1.577E+09  3.632E-01  6.263E+00  0.000E+00  0.000E+00  3.702E-03   1.0E+00
   39   57  1.013E+03  7.198E+08  1.108E-01  1.848E+00  0.000E+00  0.000E+00  6.920E-04   9.7E-01
   39   58  9.969E+02  4.276E+07  8.920E-03  1.464E-01  0.000E+00  0.000E+00  2.568E-02   9.4E-01
   39   59  8.902E+02  9.364E+07  6.675E-03  9.780E-02  0.000E+00  0.000E+00  1.754E-04   9.3E-01
   39   61  7.592E+02  0.000E+00  0.000E+00  0.000E+00  5.862E+03  0.000E+00  0.000E+00   0.0E+00
   39   62  7.535E+02  4.737E+06  4.032E-04  5.001E-03  0.000E+00  0.000E+00  1.070E-04   4.8E-01
   39   63  7.437E+02  0.000E+00  0.000E+00  0.000E+00  3.543E+03  1.597E-01  0.000E+00   0.0E+00
   39   64  7.427E+02  0.000E+00  0.000E+00  0.000E+00  5.334E+01  0.000E+00  0.000E+00   0.0E+00
   39   65  7.482E+02  1.717E+07  1.441E-03  1.774E-02  0.000E+00  0.000E+00  7.798E-03   9.4E-01
   39   66  7.407E+02  5.399E+05  6.217E-05  7.580E-04  0.000E+00  0.000E+00  3.992E-03   9.3E-01
   39   67  7.327E+02  0.000E+00  0.000E+00  0.000E+00  1.575E+03  3.493E-01  0.000E+00   0.0E+00
   39   68  7.314E+02  0.000E+00  0.000E+00  0.000E+00  1.651E+02  1.467E-03  0.000E+00   0.0E+00
   39   69  7.255E+02  0.000E+00  0.000E+00  0.000E+00  4.926E+02  9.085E-02  0.000E+00   0.0E+00
   39   70  7.254E+02  0.000E+00  0.000E+00  0.000E+00  1.420E+02  1.480E-02  0.000E+00   0.0E+00
   39   71  6.678E+02  3.246E+06  1.302E-04  1.432E-03  0.000E+00  0.000E+00  5.968E-04   1.4E-05
   39   72  5.867E+02  0.000E+00  0.000E+00  0.000E+00  1.059E+00  1.342E-01  0.000E+00   0.0E+00
   39   73  5.857E+02  0.000E+00  0.000E+00  0.000E+00  1.337E+02  0.000E+00  0.000E+00   0.0E+00
   39   74  5.772E+02  0.000E+00  0.000E+00  0.000E+00  2.564E+01  9.189E-01  0.000E+00   0.0E+00
   39   75  5.763E+02  0.000E+00  0.000E+00  0.000E+00  2.460E+01  3.065E-01  0.000E+00   0.0E+00
   39   76  2.576E+02  4.667E+09  4.645E-02  1.970E-01  0.000E+00  0.000E+00  1.140E-01   1.0E+00
   39   77  2.565E+02  1.150E+10  6.804E-02  2.873E-01  0.000E+00  0.000E+00  7.875E-02   1.0E+00
   39   78  2.369E+02  0.000E+00  0.000E+00  0.000E+00  3.627E+05  6.184E-02  0.000E+00   0.0E+00
   39   79  2.353E+02  0.000E+00  0.000E+00  0.000E+00  1.567E+04  6.741E-03  0.000E+00   0.0E+00
   39   80  2.351E+02  0.000E+00  0.000E+00  0.000E+00  3.252E+05  1.211E+01  0.000E+00   0.0E+00
   39   81  2.342E+02  0.000E+00  0.000E+00  0.000E+00  6.362E+05  1.405E+00  0.000E+00   0.0E+00
   39   82  2.348E+02  0.000E+00  0.000E+00  0.000E+00  0.000E+00  0.000E+00  1.111E-01   0.0E+00
   39   83  2.337E+02  0.000E+00  0.000E+00  0.000E+00  6.553E+05  9.361E+00  0.000E+00   0.0E+00
   39   84  2.343E+02  6.673E+07  3.295E-04  1.271E-03  0.000E+00  0.000E+00  1.209E-01   1.2E+00
   39   85  2.276E+02  0.000E+00  0.000E+00  0.000E+00  1.058E+06  0.000E+00  0.000E+00   0.0E+00
   39   86  2.164E+02  0.000E+00  0.000E+00  0.000E+00  2.242E+03  5.500E-01  0.000E+00   0.0E+00
   39   87  2.157E+02  0.000E+00  0.000E+00  0.000E+00  3.420E+02  4.465E-03  0.000E+00   0.0E+00
   39   88  2.154E+02  0.000E+00  0.000E+00  0.000E+00  3.188E+03  1.669E-03  0.000E+00   0.0E+00
   39   89  2.142E+02  0.000E+00  0.000E+00  0.000E+00  0.000E+00  0.000E+00  1.954E+00   0.0E+00
   39   90  2.137E+02  2.111E+09  8.670E-03  3.049E-02  0.000E+00  0.000E+00  1.860E+00   7.5E-01
   39   91  2.131E+02  0.000E+00  0.000E+00  0.000E+00  0.000E+00  0.000E+00  1.347E+01   0.0E+00
   39   92  2.129E+02  7.959E+08  5.408E-03  1.895E-02  0.000E+00  0.000E+00  2.254E+00   1.2E+00
   39   93  2.127E+02  1.609E+10  1.527E-01  5.345E-01  0.000E+00  0.000E+00  9.505E-01   9.8E-01
   39   94  2.120E+02  5.986E+09  4.032E-02  1.407E-01  0.000E+00  0.000E+00  1.186E-01   1.0E+00
   39   95  2.116E+02  3.322E+08  3.123E-03  1.088E-02  0.000E+00  0.000E+00  4.765E+00   1.1E+00
   39   96  2.106E+02  0.000E+00  0.000E+00  0.000E+00  4.327E+04  0.000E+00  0.000E+00   0.0E+00
   39   97  2.084E+02  4.495E+08  1.756E-03  6.022E-03  0.000E+00  0.000E+00  1.483E-02   1.0E+00
   39   98  2.047E+02  0.000E+00  0.000E+00  0.000E+00  3.456E+05  4.178E-01  0.000E+00   0.0E+00
   39  100  2.047E+02  0.000E+00  0.000E+00  0.000E+00  4.372E+06  0.000E+00  0.000E+00   0.0E+00
   39  101  2.046E+02  0.000E+00  0.000E+00  0.000E+00  2.314E+05  3.796E-02  0.000E+00   0.0E+00
   39  102  2.042E+02  0.000E+00  0.000E+00  0.000E+00  1.502E+05  6.674E-03  0.000E+00   0.0E+00
   39  103  2.042E+02  0.000E+00  0.000E+00  0.000E+00  8.646E+05  8.839E-02  0.000E+00   0.0E+00
   39  104  2.041E+02  1.904E+07  1.189E-04  3.996E-04  0.000E+00  0.000E+00  4.023E-02   1.1E+00
   39  105  2.041E+02  0.000E+00  0.000E+00  0.000E+00  2.235E+06  6.267E-02  0.000E+00   0.0E+00
   39  106  2.041E+02  4.441E+07  3.883E-04  1.304E-03  0.000E+00  0.000E+00  2.562E-01   1.1E+00
   39  107  2.041E+02  0.000E+00  0.000E+00  0.000E+00  2.689E+04  0.000E+00  0.000E+00   0.0E+00
   39  110  2.038E+02  2.952E+07  2.573E-04  8.629E-04  0.000E+00  0.000E+00  4.238E-03   1.1E+00
   39  111  2.038E+02  0.000E+00  0.000E+00  0.000E+00  0.000E+00  0.000E+00  2.082E-05   0.0E+00
   39  112  2.036E+02  0.000E+00  0.000E+00  0.000E+00  0.000E+00  0.000E+00  2.056E-02   0.0E+00
   39  114  1.970E+02  7.009E+06  4.078E-05  1.322E-04  0.000E+00  0.000E+00  4.392E-04   1.6E-01
   39  115  1.969E+02  2.531E+07  1.471E-04  4.766E-04  0.000E+00  0.000E+00  1.265E-01   8.6E-01
   39  116  1.966E+02  3.572E+07  2.897E-04  9.371E-04  0.000E+00  0.000E+00  1.988E-01   1.2E+00
   39  117  1.942E+02  2.855E+07  9.684E-05  3.096E-04  0.000E+00  0.000E+00  2.514E-03   3.3E-02
   39  118  1.898E+02  0.000E+00  0.000E+00  0.000E+00  1.805E+03  2.707E-02  0.000E+00   0.0E+00
   39  119  1.898E+02  0.000E+00  0.000E+00  0.000E+00  3.183E+04  0.000E+00  0.000E+00   0.0E+00
   39  120  1.897E+02  0.000E+00  0.000E+00  0.000E+00  8.846E+03  5.873E-02  0.000E+00   0.0E+00
   39  121  1.896E+02  0.000E+00  0.000E+00  0.000E+00  4.527E+03  2.480E-01  0.000E+00   0.0E+00
   39  122  1.893E+02  3.338E+07  2.509E-04  7.818E-04  0.000E+00  0.000E+00  4.366E-02   1.1E+00
   39  123  1.892E+02  0.000E+00  0.000E+00  0.000E+00  0.000E+00  0.000E+00  2.805E-02   0.0E+00
   39  124  1.892E+02  0.000E+00  0.000E+00  0.000E+00  0.000E+00  0.000E+00  8.179E-03   0.0E+00
   40   41  2.008E+04  0.000E+00  0.000E+00  0.000E+00  9.168E-05  0.000E+00  0.000E+00   0.0E+00
   40   42  1.357E+04  0.000E+00  0.000E+00  0.000E+00  3.533E-03  6.947E-02  0.000E+00   0.0E+00
   40   44  3.013E+03  0.000E+00  0.000E+00  0.000E+00  3.103E-02  0.000E+00  0.000E+00   0.0E+00
   40   45  2.624E+03  0.000E+00  0.000E+00  0.000E+00  4.424E-01  4.938E+02  0.000E+00   0.0E+00
   40   46  2.399E+03  0.000E+00  0.000E+00  0.000E+00  1.702E+00  0.000E+00  0.000E+00   0.0E+00
   40   47  1.964E+03  0.000E+00  0.000E+00  0.000E+00  1.393E+00  3.066E-07  0.000E+00   0.0E+00
   40   48  1.902E+03  0.000E+00  0.000E+00  0.000E+00  9.855E-03  0.000E+00  0.000E+00   0.0E+00
   40   49  1.903E+03  0.000E+00  0.000E+00  0.000E+00  2.713E-01  1.951E+02  0.000E+00   0.0E+00
   40   51  1.330E+03  0.000E+00  0.000E+00  0.000E+00  3.175E-03  2.776E+01  0.000E+00   0.0E+00
   40   53  1.104E+03  0.000E+00  0.000E+00  0.000E+00  0.000E+00  0.000E+00  8.735E-04   0.0E+00
   40   54  1.072E+03  1.727E+09  3.824E-01  9.445E+00  0.000E+00  0.000E+00  1.541E-01   1.0E+00
   40   55  1.064E+03  5.520E+07  6.696E-03  1.642E-01  0.000E+00  0.000E+00  2.384E-02   1.5E+00
   40   56  1.048E+03  2.902E+08  4.775E-02  1.153E+00  0.000E+00  0.000E+00  5.373E-04   9.9E-01
   40   57  1.013E+03  3.976E+07  4.371E-03  1.021E-01  0.000E+00  0.000E+00  8.117E-03   9.1E-01
   40   58  9.969E+02  4.060E+08  6.050E-02  1.390E+00  0.000E+00  0.000E+00  1.499E-01   9.1E-01
   40   59  8.902E+02  0.000E+00  0.000E+00  0.000E+00  0.000E+00  0.000E+00  3.438E-03   0.0E+00
   40   60  7.595E+02  0.000E+00  0.000E+00  0.000E+00  7.188E+03  0.000E+00  0.000E+00   0.0E+00
   40   61  7.592E+02  0.000E+00  0.000E+00  0.000E+00  6.504E+02  3.012E-04  0.000E+00   0.0E+00
   40   62  7.535E+02  4.463E+05  2.713E-05  4.711E-04  0.000E+00  0.000E+00  6.358E-04   7.9E-01
   40   63  7.437E+02  0.000E+00  0.000E+00  0.000E+00  4.968E+02  1.488E-02  0.000E+00   0.0E+00
   40   64  7.427E+02  0.000E+00  0.000E+00  0.000E+00  2.995E+03  3.903E-01  0.000E+00   0.0E+00
   40   65  7.482E+02  2.065E+07  1.238E-03  2.134E-02  0.000E+00  0.000E+00  8.145E-03   3.2E-01
   40   66  7.407E+02  1.407E+07  1.157E-03  1.975E-02  0.000E+00  0.000E+00  1.585E-03   5.7E-01
   40   67  7.327E+02  0.000E+00  0.000E+00  0.000E+00  1.759E+02  2.148E-02  0.000E+00   0.0E+00
   40   68  7.314E+02  0.000E+00  0.000E+00  0.000E+00  8.026E+02  7.749E-01  0.000E+00   0.0E+00
   40   69  7.255E+02  0.000E+00  0.000E+00  0.000E+00  3.053E+01  0.000E+00  0.000E+00   0.0E+00
   40   70  7.254E+02  0.000E+00  0.000E+00  0.000E+00  1.249E+02  1.379E-02  0.000E+00   0.0E+00
   40   71  6.678E+02  0.000E+00  0.000E+00  0.000E+00  0.000E+00  0.000E+00  6.100E-05   0.0E+00
   40   72  5.867E+02  0.000E+00  0.000E+00  0.000E+00  5.425E+00  1.645E-02  0.000E+00   0.0E+00
   40   73  5.857E+02  0.000E+00  0.000E+00  0.000E+00  3.561E+01  3.252E-01  0.000E+00   0.0E+00
   40   74  5.772E+02  0.000E+00  0.000E+00  0.000E+00  1.145E+00  1.045E-01  0.000E+00   0.0E+00
   40   75  5.763E+02  0.000E+00  0.000E+00  0.000E+00  4.812E+00  1.268E+00  0.000E+00   0.0E+00
   40   76  2.576E+02  1.640E+10  1.166E-01  6.922E-01  0.000E+00  0.000E+00  1.065E+01   1.0E+00
   40   77  2.565E+02  0.000E+00  0.000E+00  0.000E+00  0.000E+00  0.000E+00  2.609E+01   0.0E+00
   40   78  2.369E+02  0.000E+00  0.000E+00  0.000E+00  1.542E+06  0.000E+00  0.000E+00   0.0E+00
   40   79  2.353E+02  0.000E+00  0.000E+00  0.000E+00  4.815E+05  2.680E+01  0.000E+00   0.0E+00
   40   80  2.351E+02  0.000E+00  0.000E+00  0.000E+00  4.714E+05  2.210E-01  0.000E+00   0.0E+00
   40   81  2.342E+02  0.000E+00  0.000E+00  0.000E+00  1.121E+05  0.000E+00  0.000E+00   0.0E+00
   40   83  2.337E+02  0.000E+00  0.000E+00  0.000E+00  5.799E+05  8.990E-04  0.000E+00   0.0E+00
   40   84  2.343E+02  0.000E+00  0.000E+00  0.000E+00  0.000E+00  0.000E+00  6.048E-02   0.0E+00
   40   86  2.164E+02  0.000E+00  0.000E+00  0.000E+00  1.602E+02  0.000E+00  0.000E+00   0.0E+00
   40   87  2.157E+02  0.000E+00  0.000E+00  0.000E+00  3.781E+03  0.000E+00  0.000E+00   0.0E+00
   40   88  2.154E+02  0.000E+00  0.000E+00  0.000E+00  2.241E+02  3.534E-01  0.000E+00   0.0E+00
   40   90  2.137E+02  0.000E+00  0.000E+00  0.000E+00  0.000E+00  0.000E+00  2.987E-01   0.0E+00
   40   91  2.131E+02  1.927E+10  1.687E-01  8.288E-01  0.000E+00  0.000E+00  4.336E+01   9.8E-01
   40   92  2.129E+02  1.195E+09  5.799E-03  2.845E-02  0.000E+00  0.000E+00  8.133E+00   6.6E-01
   40   93  2.127E+02  2.841E+09  1.926E-02  9.440E-02  0.000E+00  0.000E+00  9.330E-02   1.0E+00
   40   94  2.120E+02  2.995E+08  1.441E-03  7.040E-03  0.000E+00  0.000E+00  1.618E+00   1.1E+00
   40   95  2.116E+02  2.962E+09  1.989E-02  9.701E-02  0.000E+00  0.000E+00  2.470E+01   1.1E+00
   40   97  2.084E+02  0.000E+00  0.000E+00  0.000E+00  0.000E+00  0.000E+00  1.213E+00   0.0E+00
   40   98  2.047E+02  0.000E+00  0.000E+00  0.000E+00  2.399E+04  0.000E+00  0.000E+00   0.0E+00
   40   99  2.047E+02  0.000E+00  0.000E+00  0.000E+00  5.353E+06  0.000E+00  0.000E+00   0.0E+00
   40  100  2.047E+02  0.000E+00  0.000E+00  0.000E+00  5.107E+05  5.239E-03  0.000E+00   0.0E+00
   40  101  2.046E+02  0.000E+00  0.000E+00  0.000E+00  1.393E+05  5.641E-01  0.000E+00   0.0E+00
   40  102  2.042E+02  0.000E+00  0.000E+00  0.000E+00  5.961E+05  2.398E-01  0.000E+00   0.0E+00
   40  103  2.042E+02  0.000E+00  0.000E+00  0.000E+00  7.611E+04  9.145E-02  0.000E+00   0.0E+00
   40  104  2.041E+02  8.732E+05  3.896E-06  1.832E-05  0.000E+00  0.000E+00  6.712E-04   1.1E+00
   40  105  2.041E+02  0.000E+00  0.000E+00  0.000E+00  2.626E+05  2.054E-02  0.000E+00   0.0E+00
   40  106  2.041E+02  1.264E+07  7.894E-05  3.713E-04  0.000E+00  0.000E+00  1.762E-01   1.1E+00
   40  107  2.041E+02  0.000E+00  0.000E+00  0.000E+00  1.868E+06  1.456E-01  0.000E+00   0.0E+00
   40  108  2.039E+02  0.000E+00  0.000E+00  0.000E+00  0.000E+00  0.000E+00  1.536E-05   0.0E+00
   40  110  2.038E+02  3.861E+06  2.404E-05  1.129E-04  0.000E+00  0.000E+00  9.336E-04   1.1E+00
   40  111  2.038E+02  8.651E+07  6.923E-04  3.251E-03  0.000E+00  0.000E+00  4.364E-01   1.1E+00
   40  112  2.036E+02  1.145E+05  9.154E-07  4.296E-06  0.000E+00  0.000E+00  7.842E-03   1.1E+00
   40  113  2.036E+02  0.000E+00  0.000E+00  0.000E+00  0.000E+00  0.000E+00  5.554E-02   0.0E+00
   40  114  1.970E+02  5.508E+05  2.289E-06  1.039E-05  0.000E+00  0.000E+00  8.107E-06   1.5E-01
   40  115  1.969E+02  2.132E+07  8.848E-05  4.014E-04  0.000E+00  0.000E+00  3.318E-02   4.0E-01
   40  116  1.966E+02  6.077E+04  3.520E-07  1.594E-06  0.000E+00  0.000E+00  5.041E-03   1.0E+02
   40  117  1.942E+02  0.000E+00  0.000E+00  0.000E+00  0.000E+00  0.000E+00  1.879E-01   0.0E+00
   40  118  1.898E+02  0.000E+00  0.000E+00  0.000E+00  1.282E+02  3.270E-03  0.000E+00   0.0E+00
   40  119  1.898E+02  0.000E+00  0.000E+00  0.000E+00  8.797E+02  6.149E-02  0.000E+00   0.0E+00
   40  120  1.897E+02  0.000E+00  0.000E+00  0.000E+00  1.618E+02  3.025E-01  0.000E+00   0.0E+00
   40  121  1.896E+02  0.000E+00  0.000E+00  0.000E+00  3.527E+01  2.076E-02  0.000E+00   0.0E+00
   40  122  1.893E+02  3.887E+06  2.088E-05  9.105E-05  0.000E+00  0.000E+00  8.225E-05   1.1E+00
   40  123  1.892E+02  8.085E+07  5.582E-04  2.434E-03  0.000E+00  0.000E+00  6.218E-01   1.1E+00
   40  124  1.892E+02  6.437E+05  4.443E-06  1.937E-05  0.000E+00  0.000E+00  1.094E-02   1.1E+00
   40  125  1.892E+02  0.000E+00  0.000E+00  0.000E+00  0.000E+00  0.000E+00  1.560E-02   0.0E+00
   41   42  4.187E+04  0.000E+00  0.000E+00  0.000E+00  8.530E-06  3.365E-02  0.000E+00   0.0E+00
   41   43  5.090E+03  0.000E+00  0.000E+00  0.000E+00  0.000E+00  6.815E+01  0.000E+00   0.0E+00
   41   44  3.545E+03  0.000E+00  0.000E+00  0.000E+00  3.151E-02  7.191E+01  0.000E+00   0.0E+00
   41   45  3.018E+03  0.000E+00  0.000E+00  0.000E+00  1.616E-03  2.241E+01  0.000E+00   0.0E+00
   41   46  2.725E+03  0.000E+00  0.000E+00  0.000E+00  6.884E-02  1.610E+02  0.000E+00   0.0E+00
   41   47  2.177E+03  0.000E+00  0.000E+00  0.000E+00  1.946E-02  0.000E+00  0.000E+00   0.0E+00
   41   48  2.101E+03  0.000E+00  0.000E+00  0.000E+00  8.743E-03  5.227E+01  0.000E+00   0.0E+00
   41   49  2.102E+03  0.000E+00  0.000E+00  0.000E+00  4.422E-01  6.080E+00  0.000E+00   0.0E+00
   41   50  1.502E+03  0.000E+00  0.000E+00  0.000E+00  0.000E+00  4.427E+02  0.000E+00   0.0E+00
   41   51  1.424E+03  0.000E+00  0.000E+00  0.000E+00  9.224E-01  1.868E+00  0.000E+00   0.0E+00
   41   52  1.196E+03  7.077E+07  5.061E-03  5.979E-02  0.000E+00  0.000E+00  0.000E+00   1.4E+00
   41   53  1.168E+03  2.428E+07  4.967E-03  5.731E-02  0.000E+00  0.000E+00  5.172E-03   8.8E-01
   41   55  1.124E+03  1.448E+08  4.568E-02  5.071E-01  0.000E+00  0.000E+00  2.065E-03   1.0E+00
   41   56  1.105E+03  0.000E+00  0.000E+00  0.000E+00  0.000E+00  0.000E+00  2.072E-04   0.0E+00
   41   57  1.067E+03  1.139E+09  3.241E-01  3.415E+00  0.000E+00  0.000E+00  3.096E-03   1.0E+00
   41   58  1.049E+03  0.000E+00  0.000E+00  0.000E+00  0.000E+00  0.000E+00  1.026E-01   0.0E+00
   41   59  9.314E+02  1.156E+09  1.504E-01  1.383E+00  0.000E+00  0.000E+00  3.432E-02   8.5E-01
   41   62  7.829E+02  8.396E+05  1.286E-04  9.941E-04  0.000E+00  0.000E+00  5.163E-04   1.5E+00
   41   63  7.723E+02  0.000E+00  0.000E+00  0.000E+00  3.362E+03  0.000E+00  0.000E+00   0.0E+00
   41   65  7.771E+02  6.327E+06  9.548E-04  7.328E-03  0.000E+00  0.000E+00  1.866E-03   8.4E-01
   41   66  7.691E+02  0.000E+00  0.000E+00  0.000E+00  0.000E+00  0.000E+00  8.028E-04   0.0E+00
   41   67  7.605E+02  0.000E+00  0.000E+00  0.000E+00  2.639E+03  1.195E-02  0.000E+00   0.0E+00
   41   68  7.591E+02  0.000E+00  0.000E+00  0.000E+00  1.051E+03  0.000E+00  0.000E+00   0.0E+00
   41   69  7.527E+02  0.000E+00  0.000E+00  0.000E+00  4.291E+02  1.722E-01  0.000E+00   0.0E+00
   41   70  7.525E+02  0.000E+00  0.000E+00  0.000E+00  8.957E+02  3.532E-02  0.000E+00   0.0E+00
   41   71  6.908E+02  2.382E+08  1.704E-02  1.163E-01  0.000E+00  0.000E+00  2.362E-02   5.8E-01
   41   72  6.043E+02  0.000E+00  0.000E+00  0.000E+00  7.048E+01  0.000E+00  0.000E+00   0.0E+00
   41   74  5.942E+02  0.000E+00  0.000E+00  0.000E+00  6.491E+01  6.960E-01  0.000E+00   0.0E+00
   41   75  5.933E+02  0.000E+00  0.000E+00  0.000E+00  3.327E+00  0.000E+00  0.000E+00   0.0E+00
   41   76  2.610E+02  4.541E+08  7.729E-03  1.992E-02  0.000E+00  0.000E+00  5.908E+00   9.7E-01
   41   77  2.598E+02  9.981E+09  1.010E-01  2.592E-01  0.000E+00  0.000E+00  1.228E+00   1.0E+00
   41   78  2.397E+02  0.000E+00  0.000E+00  0.000E+00  5.471E+04  1.812E+01  0.000E+00   0.0E+00
   41   79  2.381E+02  0.000E+00  0.000E+00  0.000E+00  3.615E+05  2.162E+00  0.000E+00   0.0E+00
   41   80  2.379E+02  0.000E+00  0.000E+00  0.000E+00  5.063E+04  0.000E+00  0.000E+00   0.0E+00
   41   81  2.370E+02  0.000E+00  0.000E+00  0.000E+00  4.049E+05  6.948E-02  0.000E+00   0.0E+00
   41   82  2.376E+02  1.761E+08  4.966E-04  1.165E-03  0.000E+00  0.000E+00  0.000E+00   1.1E+00
   41   83  2.364E+02  0.000E+00  0.000E+00  0.000E+00  4.630E+05  2.017E+00  0.000E+00   0.0E+00
   41   84  2.371E+02  9.623E+07  8.108E-04  1.899E-03  0.000E+00  0.000E+00  3.631E-02   9.3E-01
   41   85  2.302E+02  0.000E+00  0.000E+00  0.000E+00  0.000E+00  3.926E-01  0.000E+00   0.0E+00
   41   86  2.188E+02  0.000E+00  0.000E+00  0.000E+00  6.002E+02  1.719E-01  0.000E+00   0.0E+00
   41   87  2.180E+02  0.000E+00  0.000E+00  0.000E+00  6.878E+03  1.323E-01  0.000E+00   0.0E+00
   41   88  2.177E+02  0.000E+00  0.000E+00  0.000E+00  4.449E+03  1.704E-01  0.000E+00   0.0E+00
   41   89  2.165E+02  1.827E+09  4.279E-03  9.150E-03  0.000E+00  0.000E+00  0.000E+00   7.1E-01
   41   90  2.160E+02  3.363E+08  2.352E-03  5.016E-03  0.000E+00  0.000E+00  2.438E+00   1.3E+00
   41   92  2.152E+02  1.764E+09  2.041E-02  4.338E-02  0.000E+00  0.000E+00  8.148E-01   1.0E+00
   41   93  2.149E+02  0.000E+00  0.000E+00  0.000E+00  0.000E+00  0.000E+00  7.597E-02   0.0E+00
   41   94  2.142E+02  1.232E+10  1.413E-01  2.989E-01  0.000E+00  0.000E+00  7.227E-01   9.8E-01
   41   95  2.139E+02  0.000E+00  0.000E+00  0.000E+00  0.000E+00  0.000E+00  2.421E+01   0.0E+00
   41   96  2.129E+02  0.000E+00  0.000E+00  0.000E+00  0.000E+00  2.369E+00  0.000E+00   0.0E+00
   41   97  2.106E+02  6.712E+09  4.462E-02  9.279E-02  0.000E+00  0.000E+00  4.392E+00   1.1E+00
   41   98  2.068E+02  0.000E+00  0.000E+00  0.000E+00  3.120E+05  7.087E-03  0.000E+00   0.0E+00
   41  101  2.067E+02  0.000E+00  0.000E+00  0.000E+00  2.943E+05  3.521E-03  0.000E+00   0.0E+00
   41  102  2.064E+02  0.000E+00  0.000E+00  0.000E+00  5.757E+05  0.000E+00  0.000E+00   0.0E+00
   41  103  2.063E+02  0.000E+00  0.000E+00  0.000E+00  2.238E+06  1.205E-04  0.000E+00   0.0E+00
   41  104  2.062E+02  5.808E+07  6.171E-04  1.257E-03  0.000E+00  0.000E+00  4.969E-02   1.1E+00
   41  105  2.062E+02  0.000E+00  0.000E+00  0.000E+00  2.854E+06  0.000E+00  0.000E+00   0.0E+00
   41  106  2.062E+02  0.000E+00  0.000E+00  0.000E+00  0.000E+00  0.000E+00  2.375E-02   0.0E+00
   41  110  2.059E+02  0.000E+00  0.000E+00  0.000E+00  0.000E+00  0.000E+00  3.479E-02   0.0E+00
   41  114  1.989E+02  6.849E+07  6.773E-04  1.331E-03  0.000E+00  0.000E+00  9.816E-03   9.9E-01
   41  115  1.988E+02  7.878E+05  7.781E-06  1.528E-05  0.000E+00  0.000E+00  3.666E-02   2.1E+00
   41  116  1.985E+02  0.000E+00  0.000E+00  0.000E+00  0.000E+00  0.000E+00  7.565E-02   0.0E+00
   41  117  1.961E+02  2.860E+06  1.649E-05  3.193E-05  0.000E+00  0.000E+00  1.495E-02   1.1E+01
   41  118  1.916E+02  0.000E+00  0.000E+00  0.000E+00  3.283E+04  0.000E+00  0.000E+00   0.0E+00
   41  120  1.915E+02  0.000E+00  0.000E+00  0.000E+00  8.790E+00  0.000E+00  0.000E+00   0.0E+00
   41  121  1.914E+02  0.000E+00  0.000E+00  0.000E+00  2.550E+04  1.693E-01  0.000E+00   0.0E+00
   41  122  1.911E+02  0.000E+00  0.000E+00  0.000E+00  0.000E+00  0.000E+00  9.103E-05   0.0E+00
   42   43  5.795E+03  0.000E+00  0.000E+00  0.000E+00  1.845E-01  0.000E+00  0.000E+00   0.0E+00
   42   44  3.873E+03  0.000E+00  0.000E+00  0.000E+00  3.603E-02  2.217E+00  0.000E+00   0.0E+00
   42   45  3.253E+03  0.000E+00  0.000E+00  0.000E+00  3.520E-02  1.397E+02  0.000E+00   0.0E+00
   42   46  2.914E+03  0.000E+00  0.000E+00  0.000E+00  1.957E-02  3.411E+02  0.000E+00   0.0E+00
   42   47  2.296E+03  0.000E+00  0.000E+00  0.000E+00  3.035E-02  1.211E-02  0.000E+00   0.0E+00
   42   48  2.212E+03  0.000E+00  0.000E+00  0.000E+00  1.345E-02  9.516E+00  0.000E+00   0.0E+00
   42   49  2.214E+03  0.000E+00  0.000E+00  0.000E+00  1.040E-03  6.206E+01  0.000E+00   0.0E+00
   42   50  1.558E+03  0.000E+00  0.000E+00  0.000E+00  7.250E+01  0.000E+00  0.000E+00   0.0E+00
   42   51  1.475E+03  0.000E+00  0.000E+00  0.000E+00  1.631E+00  7.286E+00  0.000E+00   0.0E+00
   42   52  1.231E+03  0.000E+00  0.000E+00  0.000E+00  0.000E+00  0.000E+00  4.314E-05   0.0E+00
   42   53  1.202E+03  1.928E+08  2.505E-02  4.955E-01  0.000E+00  0.000E+00  1.003E-02   1.1E+00
   42   54  1.164E+03  0.000E+00  0.000E+00  0.000E+00  0.000E+00  0.000E+00  3.646E-02   0.0E+00
   42   55  1.155E+03  6.379E+08  1.276E-01  2.425E+00  0.000E+00  0.000E+00  7.335E-02   1.0E+00
   42   56  1.135E+03  2.723E+06  7.365E-04  1.376E-02  0.000E+00  0.000E+00  2.498E-04   1.1E+00
   42   57  1.095E+03  1.699E+06  3.054E-04  5.505E-03  0.000E+00  0.000E+00  1.936E-02   1.2E+00
   42   58  1.076E+03  1.433E+09  3.483E-01  6.168E+00  0.000E+00  0.000E+00  4.255E-02   1.0E+00
   42   59  9.526E+02  2.814E+04  2.297E-06  3.602E-05  0.000E+00  0.000E+00  9.610E-02   1.1E+01
   42   61  8.042E+02  0.000E+00  0.000E+00  0.000E+00  5.621E+02  0.000E+00  0.000E+00   0.0E+00
   42   62  7.978E+02  1.091E+06  1.041E-04  1.367E-03  0.000E+00  0.000E+00  1.232E-03   7.6E-01
   42   63  7.868E+02  0.000E+00  0.000E+00  0.000E+00  2.775E+01  5.191E-03  0.000E+00   0.0E+00
   42   64  7.857E+02  0.000E+00  0.000E+00  0.000E+00  4.052E+03  0.000E+00  0.000E+00   0.0E+00
   42   65  7.918E+02  5.746E+07  5.401E-03  7.040E-02  0.000E+00  0.000E+00  1.401E-02   8.5E-01
   42   66  7.835E+02  5.966E+04  7.687E-06  9.913E-05  0.000E+00  0.000E+00  1.235E-04   2.5E+00
   42   67  7.745E+02  0.000E+00  0.000E+00  0.000E+00  4.485E+02  2.542E-02  0.000E+00   0.0E+00
   42   68  7.731E+02  0.000E+00  0.000E+00  0.000E+00  3.356E+03  1.720E-03  0.000E+00   0.0E+00
   42   69  7.665E+02  0.000E+00  0.000E+00  0.000E+00  6.352E+02  6.243E-04  0.000E+00   0.0E+00
   42   70  7.663E+02  0.000E+00  0.000E+00  0.000E+00  1.354E+03  3.091E-01  0.000E+00   0.0E+00
   42   71  7.024E+02  7.727E+06  3.429E-04  3.965E-03  0.000E+00  0.000E+00  1.003E-01   1.5E+00
   42   72  6.132E+02  0.000E+00  0.000E+00  0.000E+00  1.899E+00  3.307E-03  0.000E+00   0.0E+00
   42   73  6.122E+02  0.000E+00  0.000E+00  0.000E+00  7.752E-01  0.000E+00  0.000E+00   0.0E+00
   42   74  6.028E+02  0.000E+00  0.000E+00  0.000E+00  3.906E-03  6.557E-04  0.000E+00   0.0E+00
   42   75  6.019E+02  0.000E+00  0.000E+00  0.000E+00  1.162E+00  1.362E-01  0.000E+00   0.0E+00
   42   76  2.626E+02  6.769E+09  7.000E-02  3.026E-01  0.000E+00  0.000E+00  1.326E+01   9.9E-01
   42   77  2.614E+02  8.153E+09  5.012E-02  2.157E-01  0.000E+00  0.000E+00  8.641E+00   1.0E+00
   42   78  2.411E+02  0.000E+00  0.000E+00  0.000E+00  3.891E+04  2.892E+00  0.000E+00   0.0E+00
   42   79  2.394E+02  0.000E+00  0.000E+00  0.000E+00  6.845E+05  7.014E+00  0.000E+00   0.0E+00
   42   80  2.393E+02  0.000E+00  0.000E+00  0.000E+00  4.698E+05  2.631E-01  0.000E+00   0.0E+00
   42   81  2.384E+02  0.000E+00  0.000E+00  0.000E+00  7.421E+05  6.853E+00  0.000E+00   0.0E+00
   42   82  2.389E+02  0.000E+00  0.000E+00  0.000E+00  0.000E+00  0.000E+00  3.603E-02   0.0E+00
   42   83  2.378E+02  0.000E+00  0.000E+00  0.000E+00  1.300E+04  2.126E-02  0.000E+00   0.0E+00
   42   84  2.384E+02  8.882E+07  4.542E-04  1.782E-03  0.000E+00  0.000E+00  1.143E-01   1.1E+00
   42   85  2.315E+02  0.000E+00  0.000E+00  0.000E+00  7.088E+05  0.000E+00  0.000E+00   0.0E+00
   42   86  2.199E+02  0.000E+00  0.000E+00  0.000E+00  1.900E+03  5.310E-02  0.000E+00   0.0E+00
   42   87  2.192E+02  0.000E+00  0.000E+00  0.000E+00  1.484E+02  6.912E-01  0.000E+00   0.0E+00
   42   88  2.188E+02  0.000E+00  0.000E+00  0.000E+00  1.954E+03  2.333E-01  0.000E+00   0.0E+00
   42   89  2.176E+02  0.000E+00  0.000E+00  0.000E+00  0.000E+00  0.000E+00  4.172E-03   0.0E+00
   42   90  2.171E+02  3.473E+09  1.472E-02  5.261E-02  0.000E+00  0.000E+00  5.246E+00   9.3E-01
   42   91  2.166E+02  0.000E+00  0.000E+00  0.000E+00  0.000E+00  0.000E+00  1.569E+01   0.0E+00
   42   92  2.163E+02  9.240E+09  6.481E-02  2.307E-01  0.000E+00  0.000E+00  2.812E+01   9.9E-01
   42   93  2.160E+02  3.781E+07  3.704E-04  1.317E-03  0.000E+00  0.000E+00  9.907E-02   9.6E-01
   42   94  2.153E+02  1.831E+07  1.273E-04  4.512E-04  0.000E+00  0.000E+00  5.900E+00   7.9E-01
   42   95  2.150E+02  1.576E+10  1.529E-01  5.412E-01  0.000E+00  0.000E+00  1.186E+01   9.9E-01
   42   96  2.139E+02  0.000E+00  0.000E+00  0.000E+00  8.722E+04  0.000E+00  0.000E+00   0.0E+00
   42   97  2.116E+02  6.582E+07  2.652E-04  9.237E-04  0.000E+00  0.000E+00  1.483E+01   3.8E-01
   42   98  2.079E+02  0.000E+00  0.000E+00  0.000E+00  4.891E+05  1.060E-02  0.000E+00   0.0E+00
   42  100  2.078E+02  0.000E+00  0.000E+00  0.000E+00  5.030E+05  0.000E+00  0.000E+00   0.0E+00
   42  101  2.077E+02  0.000E+00  0.000E+00  0.000E+00  1.279E+06  3.397E-02  0.000E+00   0.0E+00
   42  102  2.074E+02  0.000E+00  0.000E+00  0.000E+00  2.633E+06  2.050E-05  0.000E+00   0.0E+00
   42  103  2.073E+02  0.000E+00  0.000E+00  0.000E+00  1.290E+05  9.406E-03  0.000E+00   0.0E+00
   42  104  2.072E+02  3.238E+05  2.085E-06  7.111E-06  0.000E+00  0.000E+00  1.814E-05   1.1E+00
   42  105  2.072E+02  0.000E+00  0.000E+00  0.000E+00  2.243E+03  3.857E-06  0.000E+00   0.0E+00
   42  106  2.072E+02  7.239E+06  6.524E-05  2.225E-04  0.000E+00  0.000E+00  4.719E-02   1.1E+00
   42  107  2.072E+02  0.000E+00  0.000E+00  0.000E+00  3.506E+06  0.000E+00  0.000E+00   0.0E+00
   42  110  2.069E+02  6.150E+05  5.525E-06  1.881E-05  0.000E+00  0.000E+00  2.575E-03   1.1E+00
   42  111  2.069E+02  0.000E+00  0.000E+00  0.000E+00  0.000E+00  0.000E+00  1.171E-02   0.0E+00
   42  112  2.067E+02  0.000E+00  0.000E+00  0.000E+00  0.000E+00  0.000E+00  6.082E-04   0.0E+00
   42  114  1.999E+02  2.069E+06  1.239E-05  4.078E-05  0.000E+00  0.000E+00  6.760E-03   1.7E+00
   42  115  1.998E+02  1.891E+07  1.131E-04  3.720E-04  0.000E+00  0.000E+00  1.612E-01   1.7E+00
   42  116  1.994E+02  8.746E+06  7.302E-05  2.397E-04  0.000E+00  0.000E+00  2.857E-02   8.9E-01
   42  117  1.970E+02  2.857E+07  9.976E-05  3.235E-04  0.000E+00  0.000E+00  2.544E-01   3.9E-01
   42  118  1.925E+02  0.000E+00  0.000E+00  0.000E+00  7.144E+02  8.295E-04  0.000E+00   0.0E+00
   42  119  1.925E+02  0.000E+00  0.000E+00  0.000E+00  1.346E+03  0.000E+00  0.000E+00   0.0E+00
   42  120  1.924E+02  0.000E+00  0.000E+00  0.000E+00  6.023E+03  3.765E-02  0.000E+00   0.0E+00
   42  121  1.923E+02  0.000E+00  0.000E+00  0.000E+00  1.819E+03  3.801E-05  0.000E+00   0.0E+00
   42  122  1.919E+02  9.964E+05  7.705E-06  2.434E-05  0.000E+00  0.000E+00  1.231E-03   1.1E+00
   42  123  1.919E+02  0.000E+00  0.000E+00  0.000E+00  0.000E+00  0.000E+00  1.976E-03   0.0E+00
   42  124  1.919E+02  0.000E+00  0.000E+00  0.000E+00  0.000E+00  0.000E+00  2.140E-04   0.0E+00
   43   44  1.168E+04  0.000E+00  0.000E+00  0.000E+00  0.000E+00  3.988E-01  0.000E+00   0.0E+00
   43   45  7.415E+03  0.000E+00  0.000E+00  0.000E+00  9.158E-03  0.000E+00  0.000E+00   0.0E+00
   43   46  5.864E+03  0.000E+00  0.000E+00  0.000E+00  0.000E+00  4.258E+01  0.000E+00   0.0E+00
   43   48  3.578E+03  0.000E+00  0.000E+00  0.000E+00  0.000E+00  4.683E+00  0.000E+00   0.0E+00
   43   49  3.582E+03  0.000E+00  0.000E+00  0.000E+00  9.114E-02  0.000E+00  0.000E+00   0.0E+00
   43   51  1.978E+03  0.000E+00  0.000E+00  0.000E+00  5.431E-01  0.000E+00  0.000E+00   0.0E+00
   43   53  1.516E+03  1.573E+07  1.626E-02  8.117E-02  0.000E+00  0.000E+00  0.000E+00   1.2E+00
   43   55  1.442E+03  0.000E+00  0.000E+00  0.000E+00  0.000E+00  0.000E+00  7.459E-03   0.0E+00
   43   57  1.350E+03  0.000E+00  0.000E+00  0.000E+00  0.000E+00  0.000E+00  2.938E-03   0.0E+00
   43   59  1.140E+03  7.686E+08  4.493E-01  1.686E+00  0.000E+00  0.000E+00  0.000E+00   9.8E-01
   43   62  9.252E+02  0.000E+00  0.000E+00  0.000E+00  0.000E+00  0.000E+00  1.205E-03   0.0E+00
   43   65  9.171E+02  0.000E+00  0.000E+00  0.000E+00  0.000E+00  0.000E+00  2.801E-02   0.0E+00
   43   67  8.940E+02  0.000E+00  0.000E+00  0.000E+00  4.854E+02  0.000E+00  0.000E+00   0.0E+00
   43   69  8.833E+02  0.000E+00  0.000E+00  0.000E+00  0.000E+00  3.756E-02  0.000E+00   0.0E+00
   43   70  8.831E+02  0.000E+00  0.000E+00  0.000E+00  6.127E+02  0.000E+00  0.000E+00   0.0E+00
   43   71  7.993E+02  9.919E+07  2.850E-02  7.500E-02  0.000E+00  0.000E+00  0.000E+00   1.2E+00
   43   74  6.728E+02  0.000E+00  0.000E+00  0.000E+00  1.917E+03  0.000E+00  0.000E+00   0.0E+00
   43   76  2.751E+02  0.000E+00  0.000E+00  0.000E+00  0.000E+00  0.000E+00  2.893E+00   0.0E+00
   43   77  2.738E+02  3.456E+09  1.165E-01  1.050E-01  0.000E+00  0.000E+00  0.000E+00   9.1E-01
   43   78  2.516E+02  0.000E+00  0.000E+00  0.000E+00  0.000E+00  2.341E+00  0.000E+00   0.0E+00
   43   79  2.498E+02  0.000E+00  0.000E+00  0.000E+00  1.621E+05  0.000E+00  0.000E+00   0.0E+00
   43   81  2.486E+02  0.000E+00  0.000E+00  0.000E+00  0.000E+00  2.168E+00  0.000E+00   0.0E+00
   43   83  2.480E+02  0.000E+00  0.000E+00  0.000E+00  1.210E+05  0.000E+00  0.000E+00   0.0E+00
   43   84  2.486E+02  6.649E+08  1.849E-02  1.514E-02  0.000E+00  0.000E+00  0.000E+00   1.1E+00
   43   86  2.286E+02  0.000E+00  0.000E+00  0.000E+00  0.000E+00  2.149E-03  0.000E+00   0.0E+00
   43   87  2.278E+02  0.000E+00  0.000E+00  0.000E+00  0.000E+00  6.481E-03  0.000E+00   0.0E+00
   43   88  2.274E+02  0.000E+00  0.000E+00  0.000E+00  1.141E+05  0.000E+00  0.000E+00   0.0E+00
   43   90  2.255E+02  3.755E+08  8.590E-03  6.378E-03  0.000E+00  0.000E+00  0.000E+00   9.0E-01
   43   92  2.247E+02  0.000E+00  0.000E+00  0.000E+00  0.000E+00  0.000E+00  1.091E+01   0.0E+00
   43   94  2.236E+02  0.000E+00  0.000E+00  0.000E+00  0.000E+00  0.000E+00  2.738E+00   0.0E+00
   43   97  2.197E+02  9.808E+09  2.128E-01  1.539E-01  0.000E+00  0.000E+00  0.000E+00   9.9E-01
   43   98  2.156E+02  0.000E+00  0.000E+00  0.000E+00  0.000E+00  1.582E-03  0.000E+00   0.0E+00
   43  101  2.155E+02  0.000E+00  0.000E+00  0.000E+00  6.063E+05  0.000E+00  0.000E+00   0.0E+00
   43  103  2.150E+02  0.000E+00  0.000E+00  0.000E+00  1.062E+06  0.000E+00  0.000E+00   0.0E+00
   43  104  2.149E+02  0.000E+00  0.000E+00  0.000E+00  0.000E+00  0.000E+00  5.784E-05   0.0E+00
   43  114  2.070E+02  0.000E+00  0.000E+00  0.000E+00  0.000E+00  0.000E+00  1.794E-01   0.0E+00
   43  115  2.069E+02  0.000E+00  0.000E+00  0.000E+00  0.000E+00  0.000E+00  2.128E+00   0.0E+00
   43  117  2.040E+02  1.345E+09  2.517E-02  1.690E-02  0.000E+00  0.000E+00  0.000E+00   9.6E-01
   43  121  1.989E+02  0.000E+00  0.000E+00  0.000E+00  8.099E+05  0.000E+00  0.000E+00   0.0E+00
   44   45  2.032E+04  0.000E+00  0.000E+00  0.000E+00  1.823E-04  1.279E+00  0.000E+00   0.0E+00
   44   46  1.178E+04  0.000E+00  0.000E+00  0.000E+00  8.412E-03  1.297E-02  0.000E+00   0.0E+00
   44   47  5.642E+03  0.000E+00  0.000E+00  0.000E+00  1.153E-04  0.000E+00  0.000E+00   0.0E+00
   44   48  5.160E+03  0.000E+00  0.000E+00  0.000E+00  2.757E-02  8.343E-01  0.000E+00   0.0E+00
   44   49  5.167E+03  0.000E+00  0.000E+00  0.000E+00  2.473E-02  1.544E+00  0.000E+00   0.0E+00
   44   50  2.608E+03  0.000E+00  0.000E+00  0.000E+00  0.000E+00  1.810E+01  0.000E+00   0.0E+00
   44   51  2.381E+03  0.000E+00  0.000E+00  0.000E+00  4.984E-02  2.565E+00  0.000E+00   0.0E+00
   44   52  1.806E+03  1.124E+07  1.831E-03  3.265E-02  0.000E+00  0.000E+00  0.000E+00   1.8E-04
   44   53  1.742E+03  1.114E+05  5.072E-05  8.728E-04  0.000E+00  0.000E+00  2.624E-05   3.3E+01
   44   55  1.646E+03  5.254E+05  3.555E-04  5.778E-03  0.000E+00  0.000E+00  3.321E-05   3.4E+00
   44   56  1.606E+03  0.000E+00  0.000E+00  0.000E+00  0.000E+00  0.000E+00  5.753E-05   0.0E+00
   44   57  1.526E+03  1.320E+06  7.685E-04  1.159E-02  0.000E+00  0.000E+00  2.408E-06   4.3E-01
   44   58  1.490E+03  0.000E+00  0.000E+00  0.000E+00  0.000E+00  0.000E+00  2.600E-04   0.0E+00
   44   59  1.263E+03  1.814E+06  4.340E-04  5.416E-03  0.000E+00  0.000E+00  6.521E-05   2.0E+00
   44   62  1.005E+03  1.480E+09  3.732E-01  3.704E+00  0.000E+00  0.000E+00  2.913E-03   1.0E+00
   44   63  9.875E+02  0.000E+00  0.000E+00  0.000E+00  1.194E+01  0.000E+00  0.000E+00   0.0E+00
   44   65  9.953E+02  1.970E+07  4.875E-03  4.792E-02  0.000E+00  0.000E+00  1.569E-03   9.5E-01
   44   66  9.822E+02  0.000E+00  0.000E+00  0.000E+00  0.000E+00  0.000E+00  6.697E-02   0.0E+00
   44   67  9.682E+02  0.000E+00  0.000E+00  0.000E+00  3.197E+00  2.156E-01  0.000E+00   0.0E+00
   44   68  9.659E+02  0.000E+00  0.000E+00  0.000E+00  2.687E+00  0.000E+00  0.000E+00   0.0E+00
   44   69  9.556E+02  0.000E+00  0.000E+00  0.000E+00  1.132E+01  3.420E-02  0.000E+00   0.0E+00
   44   70  9.553E+02  0.000E+00  0.000E+00  0.000E+00  1.827E+01  1.433E-02  0.000E+00   0.0E+00
   44   71  8.580E+02  5.468E+08  6.035E-02  5.114E-01  0.000E+00  0.000E+00  1.332E-02   8.1E-01
   44   72  7.285E+02  0.000E+00  0.000E+00  0.000E+00  6.025E+03  0.000E+00  0.000E+00   0.0E+00
   44   74  7.139E+02  0.000E+00  0.000E+00  0.000E+00  1.641E+03  1.483E+01  0.000E+00   0.0E+00
   44   75  7.126E+02  0.000E+00  0.000E+00  0.000E+00  6.835E+01  0.000E+00  0.000E+00   0.0E+00
   44   76  2.817E+02  7.647E+06  1.517E-04  4.220E-04  0.000E+00  0.000E+00  1.159E-01   8.6E-01
   44   77  2.804E+02  1.004E+08  1.183E-03  3.275E-03  0.000E+00  0.000E+00  2.345E-02   1.0E+00
   44   78  2.571E+02  0.000E+00  0.000E+00  0.000E+00  3.654E+03  6.113E-01  0.000E+00   0.0E+00
   44   79  2.552E+02  0.000E+00  0.000E+00  0.000E+00  3.707E+03  5.254E-02  0.000E+00   0.0E+00
   44   80  2.550E+02  0.000E+00  0.000E+00  0.000E+00  7.937E+02  0.000E+00  0.000E+00   0.0E+00
   44   81  2.540E+02  0.000E+00  0.000E+00  0.000E+00  8.934E+03  1.184E-01  0.000E+00   0.0E+00
   44   82  2.546E+02  1.517E+10  4.916E-02  1.236E-01  0.000E+00  0.000E+00  0.000E+00   1.0E+00
   44   83  2.533E+02  0.000E+00  0.000E+00  0.000E+00  1.006E+04  5.203E-06  0.000E+00   0.0E+00
   44   84  2.541E+02  3.772E+09  3.650E-02  9.159E-02  0.000E+00  0.000E+00  8.191E-01   1.0E+00
   44   85  2.462E+02  0.000E+00  0.000E+00  0.000E+00  0.000E+00  1.605E+00  0.000E+00   0.0E+00
   44   86  2.331E+02  0.000E+00  0.000E+00  0.000E+00  4.910E+04  6.950E-04  0.000E+00   0.0E+00
   44   87  2.323E+02  0.000E+00  0.000E+00  0.000E+00  9.828E+05  6.592E+00  0.000E+00   0.0E+00
   44   88  2.319E+02  0.000E+00  0.000E+00  0.000E+00  3.041E+05  1.388E+01  0.000E+00   0.0E+00
   44   89  2.306E+02  1.401E+06  3.722E-06  8.477E-06  0.000E+00  0.000E+00  0.000E+00   1.8E+02
   44   90  2.300E+02  1.496E+08  1.186E-03  2.694E-03  0.000E+00  0.000E+00  1.718E-04   1.5E-02
   44   92  2.291E+02  7.851E+07  1.030E-03  2.329E-03  0.000E+00  0.000E+00  2.514E-02   4.6E-01
   44   93  2.288E+02  0.000E+00  0.000E+00  0.000E+00  0.000E+00  0.000E+00  3.321E-02   0.0E+00
   44   94  2.280E+02  9.955E+07  1.293E-03  2.912E-03  0.000E+00  0.000E+00  5.912E-02   1.3E+00
   44   95  2.276E+02  0.000E+00  0.000E+00  0.000E+00  0.000E+00  0.000E+00  4.408E-01   0.0E+00
   44   96  2.265E+02  0.000E+00  0.000E+00  0.000E+00  0.000E+00  4.199E-01  0.000E+00   0.0E+00
   44   97  2.239E+02  7.838E+06  5.889E-05  1.302E-04  0.000E+00  0.000E+00  1.961E-02   1.4E+00
   44   98  2.196E+02  0.000E+00  0.000E+00  0.000E+00  8.079E+03  5.263E-04  0.000E+00   0.0E+00
   44  101  2.195E+02  0.000E+00  0.000E+00  0.000E+00  7.192E+03  2.329E-04  0.000E+00   0.0E+00
   44  102  2.191E+02  0.000E+00  0.000E+00  0.000E+00  1.038E+04  0.000E+00  0.000E+00   0.0E+00
   44  103  2.190E+02  0.000E+00  0.000E+00  0.000E+00  4.227E+04  7.796E-04  0.000E+00   0.0E+00
   44  104  2.189E+02  1.548E+09  1.854E-02  4.010E-02  0.000E+00  0.000E+00  1.206E+00   1.1E+00
   44  105  2.189E+02  0.000E+00  0.000E+00  0.000E+00  3.644E+04  0.000E+00  0.000E+00   0.0E+00
   44  106  2.189E+02  0.000E+00  0.000E+00  0.000E+00  0.000E+00  0.000E+00  6.743E-01   0.0E+00
   44  110  2.186E+02  0.000E+00  0.000E+00  0.000E+00  0.000E+00  0.000E+00  9.264E-01   0.0E+00
   44  114  2.108E+02  1.234E+10  1.370E-01  2.853E-01  0.000E+00  0.000E+00  5.945E-01   1.0E+00
   44  115  2.106E+02  3.523E+08  3.906E-03  8.125E-03  0.000E+00  0.000E+00  2.856E-01   1.0E+00
   44  116  2.103E+02  0.000E+00  0.000E+00  0.000E+00  0.000E+00  0.000E+00  1.126E+01   0.0E+00
   44  117  2.076E+02  2.238E+09  1.446E-02  2.964E-02  0.000E+00  0.000E+00  1.020E+00   1.1E+00
   44  118  2.026E+02  0.000E+00  0.000E+00  0.000E+00  3.607E+06  0.000E+00  0.000E+00   0.0E+00
   44  120  2.024E+02  0.000E+00  0.000E+00  0.000E+00  4.950E+04  0.000E+00  0.000E+00   0.0E+00
   44  121  2.024E+02  0.000E+00  0.000E+00  0.000E+00  8.640E+05  2.182E+00  0.000E+00   0.0E+00
   44  122  2.019E+02  0.000E+00  0.000E+00  0.000E+00  0.000E+00  0.000E+00  8.475E-05   0.0E+00
   45   46  2.803E+04  0.000E+00  0.000E+00  0.000E+00  8.899E-05  1.761E-01  0.000E+00   0.0E+00
   45   47  7.811E+03  0.000E+00  0.000E+00  0.000E+00  2.133E-04  4.792E+00  0.000E+00   0.0E+00
   45   48  6.916E+03  0.000E+00  0.000E+00  0.000E+00  3.605E-03  1.833E+00  0.000E+00   0.0E+00
   45   49  6.929E+03  0.000E+00  0.000E+00  0.000E+00  1.010E-02  3.019E-03  0.000E+00   0.0E+00
   45   50  2.992E+03  0.000E+00  0.000E+00  0.000E+00  1.154E+01  0.000E+00  0.000E+00   0.0E+00
   45   51  2.698E+03  0.000E+00  0.000E+00  0.000E+00  1.352E-01  8.103E-01  0.000E+00   0.0E+00
   45   52  1.982E+03  0.000E+00  0.000E+00  0.000E+00  0.000E+00  0.000E+00  4.032E-06   0.0E+00
   45   53  1.906E+03  1.042E+07  3.404E-03  1.068E-01  0.000E+00  0.000E+00  1.748E-04   9.1E-02
   45   54  1.812E+03  0.000E+00  0.000E+00  0.000E+00  0.000E+00  0.000E+00  2.208E-05   0.0E+00
   45   55  1.791E+03  1.074E+06  5.161E-04  1.521E-02  0.000E+00  0.000E+00  6.757E-05   7.5E+00
   45   56  1.744E+03  1.391E+06  8.881E-04  2.549E-02  0.000E+00  0.000E+00  2.393E-05   8.2E-01
   45   57  1.651E+03  8.597E+05  3.511E-04  9.540E-03  0.000E+00  0.000E+00  6.452E-09   1.8E+00
   45   58  1.608E+03  1.495E+04  8.111E-06  2.147E-04  0.000E+00  0.000E+00  8.096E-05   5.6E+00
   45   59  1.347E+03  8.888E+06  1.451E-03  3.218E-02  0.000E+00  0.000E+00  5.630E-04   1.7E-01
   45   61  1.068E+03  0.000E+00  0.000E+00  0.000E+00  1.434E+01  0.000E+00  0.000E+00   0.0E+00
   45   62  1.057E+03  1.706E+08  2.858E-02  4.972E-01  0.000E+00  0.000E+00  8.482E-04   1.1E+00
   45   63  1.038E+03  0.000E+00  0.000E+00  0.000E+00  5.807E+00  4.893E-01  0.000E+00   0.0E+00
   45   64  1.036E+03  0.000E+00  0.000E+00  0.000E+00  1.203E+00  0.000E+00  0.000E+00   0.0E+00
   45   65  1.047E+03  1.714E+08  2.815E-02  4.850E-01  0.000E+00  0.000E+00  5.512E-02   1.0E+00
   45   66  1.032E+03  1.554E+09  3.474E-01  5.902E+00  0.000E+00  0.000E+00  1.768E-01   1.0E+00
   45   67  1.017E+03  0.000E+00  0.000E+00  0.000E+00  2.975E+00  1.303E+00  0.000E+00   0.0E+00
   45   68  1.014E+03  0.000E+00  0.000E+00  0.000E+00  2.007E-02  6.279E-02  0.000E+00   0.0E+00
   45   69  1.003E+03  0.000E+00  0.000E+00  0.000E+00  1.621E+01  1.475E+00  0.000E+00   0.0E+00
   45   70  1.002E+03  0.000E+00  0.000E+00  0.000E+00  1.007E+01  2.932E-02  0.000E+00   0.0E+00
   45   71  8.959E+02  4.052E+07  2.926E-03  4.314E-02  0.000E+00  0.000E+00  1.006E-03   9.0E-01
   45   72  7.556E+02  0.000E+00  0.000E+00  0.000E+00  8.291E+02  5.783E-01  0.000E+00   0.0E+00
   45   73  7.541E+02  0.000E+00  0.000E+00  0.000E+00  5.966E+03  0.000E+00  0.000E+00   0.0E+00
   45   74  7.399E+02  0.000E+00  0.000E+00  0.000E+00  4.953E+02  6.711E+00  0.000E+00   0.0E+00
   45   75  7.385E+02  0.000E+00  0.000E+00  0.000E+00  1.220E+03  1.066E+01  0.000E+00   0.0E+00
   45   76  2.857E+02  1.455E+08  1.780E-03  8.372E-03  0.000E+00  0.000E+00  2.763E-03   8.8E-01
   45   77  2.843E+02  4.026E+07  2.926E-04  1.369E-03  0.000E+00  0.000E+00  6.360E-03   9.1E-01
   45   78  2.604E+02  0.000E+00  0.000E+00  0.000E+00  1.311E-01  2.036E-03  0.000E+00   0.0E+00
   45   79  2.585E+02  0.000E+00  0.000E+00  0.000E+00  2.014E+03  4.823E-03  0.000E+00   0.0E+00
   45   80  2.583E+02  0.000E+00  0.000E+00  0.000E+00  9.857E+03  1.812E-01  0.000E+00   0.0E+00
   45   81  2.572E+02  0.000E+00  0.000E+00  0.000E+00  8.848E+02  3.668E-02  0.000E+00   0.0E+00
   45   82  2.579E+02  0.000E+00  0.000E+00  0.000E+00  0.000E+00  0.000E+00  2.970E+01   0.0E+00
   45   83  2.565E+02  0.000E+00  0.000E+00  0.000E+00  1.444E+04  2.951E-04  0.000E+00   0.0E+00
   45   84  2.573E+02  1.514E+10  9.017E-02  3.819E-01  0.000E+00  0.000E+00  1.480E+01   1.0E+00
   45   85  2.492E+02  0.000E+00  0.000E+00  0.000E+00  7.265E+04  0.000E+00  0.000E+00   0.0E+00
   45   86  2.358E+02  0.000E+00  0.000E+00  0.000E+00  7.620E+05  1.300E+01  0.000E+00   0.0E+00
   45   87  2.350E+02  0.000E+00  0.000E+00  0.000E+00  4.125E+05  9.725E-02  0.000E+00   0.0E+00
   45   88  2.346E+02  0.000E+00  0.000E+00  0.000E+00  5.303E+05  2.930E-01  0.000E+00   0.0E+00
   45   89  2.332E+02  0.000E+00  0.000E+00  0.000E+00  0.000E+00  0.000E+00  2.858E-02   0.0E+00
   45   90  2.326E+02  5.108E+07  2.486E-04  9.519E-04  0.000E+00  0.000E+00  1.266E-02   6.9E+00
   45   91  2.320E+02  0.000E+00  0.000E+00  0.000E+00  0.000E+00  0.000E+00  1.291E-01   0.0E+00
   45   92  2.317E+02  3.383E+08  2.723E-03  1.038E-02  0.000E+00  0.000E+00  1.127E+00   2.9E-01
   45   93  2.314E+02  1.491E+08  1.676E-03  6.385E-03  0.000E+00  0.000E+00  3.834E-02   1.1E+00
   45   94  2.306E+02  1.108E+08  8.832E-04  3.352E-03  0.000E+00  0.000E+00  2.220E-03   7.2E-01
   45   95  2.302E+02  2.660E+04  2.959E-07  1.121E-06  0.000E+00  0.000E+00  6.500E-02   9.9E+01
   45   96  2.290E+02  0.000E+00  0.000E+00  0.000E+00  1.383E+06  0.000E+00  0.000E+00   0.0E+00
   45   97  2.264E+02  1.252E+06  5.772E-06  2.151E-05  0.000E+00  0.000E+00  4.856E-04   4.3E+01
   45   98  2.221E+02  0.000E+00  0.000E+00  0.000E+00  1.695E+04  1.717E-01  0.000E+00   0.0E+00
   45  100  2.220E+02  0.000E+00  0.000E+00  0.000E+00  5.122E+04  0.000E+00  0.000E+00   0.0E+00
   45  101  2.219E+02  0.000E+00  0.000E+00  0.000E+00  1.623E+04  6.945E-02  0.000E+00   0.0E+00
   45  102  2.215E+02  0.000E+00  0.000E+00  0.000E+00  1.238E+04  5.423E-02  0.000E+00   0.0E+00
   45  103  2.214E+02  0.000E+00  0.000E+00  0.000E+00  1.706E+04  1.580E-01  0.000E+00   0.0E+00
   45  104  2.213E+02  2.899E+08  2.129E-03  7.758E-03  0.000E+00  0.000E+00  3.456E-01   1.0E+00
   45  105  2.213E+02  0.000E+00  0.000E+00  0.000E+00  2.803E+04  9.899E-02  0.000E+00   0.0E+00
   45  106  2.213E+02  1.382E+09  1.420E-02  5.174E-02  0.000E+00  0.000E+00  7.268E+00   1.0E+00
   45  107  2.213E+02  0.000E+00  0.000E+00  0.000E+00  4.049E+03  0.000E+00  0.000E+00   0.0E+00
   45  110  2.209E+02  1.424E+08  1.458E-03  5.304E-03  0.000E+00  0.000E+00  1.384E-02   1.1E+00
   45  111  2.209E+02  0.000E+00  0.000E+00  0.000E+00  0.000E+00  0.000E+00  2.803E-01   0.0E+00
   45  112  2.208E+02  0.000E+00  0.000E+00  0.000E+00  0.000E+00  0.000E+00  9.264E-02   0.0E+00
   45  114  2.130E+02  2.094E+09  1.424E-02  4.992E-02  0.000E+00  0.000E+00  4.250E-02   9.3E-01
   45  115  2.128E+02  1.708E+09  1.160E-02  4.065E-02  0.000E+00  0.000E+00  1.335E+01   9.5E-01
   45  116  2.125E+02  1.441E+10  1.365E-01  4.775E-01  0.000E+00  0.000E+00  3.876E+01   1.0E+00
   45  117  2.097E+02  2.923E+08  1.157E-03  3.993E-03  0.000E+00  0.000E+00  1.671E-05   1.4E+00
   45  118  2.046E+02  0.000E+00  0.000E+00  0.000E+00  6.444E+05  4.075E-02  0.000E+00   0.0E+00
   45  119  2.046E+02  0.000E+00  0.000E+00  0.000E+00  4.192E+06  0.000E+00  0.000E+00   0.0E+00
   45  120  2.044E+02  0.000E+00  0.000E+00  0.000E+00  7.349E+05  1.601E+00  0.000E+00   0.0E+00
   45  121  2.044E+02  0.000E+00  0.000E+00  0.000E+00  2.789E+05  7.556E-01  0.000E+00   0.0E+00
   45  122  2.040E+02  1.399E+08  1.222E-03  4.102E-03  0.000E+00  0.000E+00  2.032E-01   1.1E+00
   45  123  2.040E+02  0.000E+00  0.000E+00  0.000E+00  0.000E+00  0.000E+00  9.082E-02   0.0E+00
   45  124  2.039E+02  0.000E+00  0.000E+00  0.000E+00  0.000E+00  0.000E+00  3.635E-02   0.0E+00
   46   47  1.083E+04  0.000E+00  0.000E+00  0.000E+00  5.754E-05  0.000E+00  0.000E+00   0.0E+00
   46   48  9.181E+03  0.000E+00  0.000E+00  0.000E+00  8.158E-03  3.700E-01  0.000E+00   0.0E+00
   46   49  9.203E+03  0.000E+00  0.000E+00  0.000E+00  4.900E-03  6.008E-02  0.000E+00   0.0E+00
   46   50  3.349E+03  0.000E+00  0.000E+00  0.000E+00  0.000E+00  1.126E+02  0.000E+00   0.0E+00
   46   51  2.985E+03  0.000E+00  0.000E+00  0.000E+00  3.554E-02  3.353E-01  0.000E+00   0.0E+00
   46   52  2.132E+03  7.423E+06  1.687E-03  3.553E-02  0.000E+00  0.000E+00  0.000E+00   1.0E+00
   46   53  2.045E+03  1.204E+06  7.548E-04  1.524E-02  0.000E+00  0.000E+00  3.150E-05   1.9E+00
   46   55  1.913E+03  4.547E+05  4.156E-04  7.852E-03  0.000E+00  0.000E+00  9.911E-05   2.0E+00
   46   56  1.860E+03  0.000E+00  0.000E+00  0.000E+00  0.000E+00  0.000E+00  1.819E-05   0.0E+00
   46   57  1.754E+03  4.212E+03  3.237E-06  5.608E-05  0.000E+00  0.000E+00  2.434E-05   3.5E-01
   46   58  1.706E+03  0.000E+00  0.000E+00  0.000E+00  0.000E+00  0.000E+00  4.378E-05   0.0E+00
   46   59  1.415E+03  1.628E+07  4.889E-03  6.833E-02  0.000E+00  0.000E+00  7.168E-04   1.7E+00
   46   62  1.098E+03  5.172E+05  1.559E-04  1.692E-03  0.000E+00  0.000E+00  7.562E-04   1.2E+00
   46   63  1.078E+03  0.000E+00  0.000E+00  0.000E+00  5.319E-02  0.000E+00  0.000E+00   0.0E+00
   46   65  1.087E+03  1.441E+09  4.256E-01  4.570E+00  0.000E+00  0.000E+00  1.558E-01   1.0E+00
   46   66  1.072E+03  0.000E+00  0.000E+00  0.000E+00  0.000E+00  0.000E+00  1.326E-02   0.0E+00
   46   67  1.055E+03  0.000E+00  0.000E+00  0.000E+00  4.736E+00  5.238E-03  0.000E+00   0.0E+00
   46   68  1.052E+03  0.000E+00  0.000E+00  0.000E+00  1.844E+01  0.000E+00  0.000E+00   0.0E+00
   46   69  1.040E+03  0.000E+00  0.000E+00  0.000E+00  3.929E+01  1.745E-02  0.000E+00   0.0E+00
   46   70  1.040E+03  0.000E+00  0.000E+00  0.000E+00  2.138E+01  3.083E-02  0.000E+00   0.0E+00
   46   71  9.255E+02  6.888E+08  8.845E-02  8.084E-01  0.000E+00  0.000E+00  5.006E-03   8.4E-01
   46   72  7.765E+02  0.000E+00  0.000E+00  0.000E+00  2.051E+01  0.000E+00  0.000E+00   0.0E+00
   46   74  7.600E+02  0.000E+00  0.000E+00  0.000E+00  2.005E+03  4.484E-01  0.000E+00   0.0E+00
   46   75  7.585E+02  0.000E+00  0.000E+00  0.000E+00  5.754E+03  0.000E+00  0.000E+00   0.0E+00
   46   76  2.886E+02  1.230E+08  2.560E-03  7.299E-03  0.000E+00  0.000E+00  8.948E-02   8.5E-01
   46   77  2.872E+02  9.726E+05  1.203E-05  3.412E-05  0.000E+00  0.000E+00  1.101E-01   2.2E+00
   46   78  2.629E+02  0.000E+00  0.000E+00  0.000E+00  2.332E+00  6.440E-01  0.000E+00   0.0E+00
   46   79  2.609E+02  0.000E+00  0.000E+00  0.000E+00  2.938E+03  8.433E-02  0.000E+00   0.0E+00
   46   80  2.607E+02  0.000E+00  0.000E+00  0.000E+00  1.403E+04  0.000E+00  0.000E+00   0.0E+00
   46   81  2.596E+02  0.000E+00  0.000E+00  0.000E+00  1.598E+02  2.788E-01  0.000E+00   0.0E+00
   46   82  2.603E+02  1.367E+10  4.628E-02  1.190E-01  0.000E+00  0.000E+00  0.000E+00   1.0E+00
   46   83  2.589E+02  0.000E+00  0.000E+00  0.000E+00  3.208E+01  1.956E-02  0.000E+00   0.0E+00
   46   84  2.597E+02  6.573E+09  6.645E-02  1.704E-01  0.000E+00  0.000E+00  1.674E+01   1.0E+00
   46   85  2.514E+02  0.000E+00  0.000E+00  0.000E+00  0.000E+00  2.162E+01  0.000E+00   0.0E+00
   46   86  2.379E+02  0.000E+00  0.000E+00  0.000E+00  9.234E+05  2.944E+00  0.000E+00   0.0E+00
   46   87  2.370E+02  0.000E+00  0.000E+00  0.000E+00  1.502E+05  1.007E+00  0.000E+00   0.0E+00
   46   88  2.366E+02  0.000E+00  0.000E+00  0.000E+00  5.247E+05  2.178E+00  0.000E+00   0.0E+00
   46   89  2.352E+02  6.428E+08  1.777E-03  4.126E-03  0.000E+00  0.000E+00  0.000E+00   1.1E+00
   46   90  2.346E+02  2.858E+08  2.357E-03  5.460E-03  0.000E+00  0.000E+00  2.537E-01   7.6E-01
   46   92  2.336E+02  3.370E+06  4.597E-05  1.061E-04  0.000E+00  0.000E+00  9.764E-02   1.9E+00
   46   93  2.333E+02  0.000E+00  0.000E+00  0.000E+00  0.000E+00  0.000E+00  4.908E-02   0.0E+00
   46   94  2.325E+02  5.006E+04  6.763E-07  1.553E-06  0.000E+00  0.000E+00  8.236E-02   3.1E+00
   46   95  2.321E+02  0.000E+00  0.000E+00  0.000E+00  0.000E+00  0.000E+00  1.074E-01   0.0E+00
   46   96  2.309E+02  0.000E+00  0.000E+00  0.000E+00  0.000E+00  5.317E+00  0.000E+00   0.0E+00
   46   97  2.282E+02  1.523E+08  1.189E-03  2.679E-03  0.000E+00  0.000E+00  8.268E-01   6.0E-01
   46   98  2.238E+02  0.000E+00  0.000E+00  0.000E+00  7.718E+04  5.878E-03  0.000E+00   0.0E+00
   46  101  2.237E+02  0.000E+00  0.000E+00  0.000E+00  4.571E+04  2.039E-03  0.000E+00   0.0E+00
   46  102  2.233E+02  0.000E+00  0.000E+00  0.000E+00  1.804E+04  0.000E+00  0.000E+00   0.0E+00
   46  103  2.232E+02  0.000E+00  0.000E+00  0.000E+00  1.989E+03  4.214E-06  0.000E+00   0.0E+00
   46  104  2.231E+02  4.803E+07  5.973E-04  1.316E-03  0.000E+00  0.000E+00  4.110E-02   1.0E+00
   46  105  2.231E+02  0.000E+00  0.000E+00  0.000E+00  3.444E+00  0.000E+00  0.000E+00   0.0E+00
   46  106  2.231E+02  0.000E+00  0.000E+00  0.000E+00  0.000E+00  0.000E+00  2.603E-02   0.0E+00
   46  110  2.227E+02  0.000E+00  0.000E+00  0.000E+00  0.000E+00  0.000E+00  3.026E-02   0.0E+00
   46  114  2.146E+02  8.682E+07  9.992E-04  2.118E-03  0.000E+00  0.000E+00  2.128E-02   9.6E-01
   46  115  2.145E+02  1.667E+10  1.916E-01  4.059E-01  0.000E+00  0.000E+00  4.651E+01   9.9E-01
   46  116  2.141E+02  0.000E+00  0.000E+00  0.000E+00  0.000E+00  0.000E+00  3.642E+00   0.0E+00
   46  117  2.113E+02  4.189E+09  2.804E-02  5.852E-02  0.000E+00  0.000E+00  2.088E-01   1.1E+00
   46  118  2.061E+02  0.000E+00  0.000E+00  0.000E+00  6.325E+03  0.000E+00  0.000E+00   0.0E+00
   46  120  2.059E+02  0.000E+00  0.000E+00  0.000E+00  4.270E+06  0.000E+00  0.000E+00   0.0E+00
   46  121  2.059E+02  0.000E+00  0.000E+00  0.000E+00  1.513E+06  7.078E-02  0.000E+00   0.0E+00
   46  122  2.055E+02  0.000E+00  0.000E+00  0.000E+00  0.000E+00  0.000E+00  1.980E-05   0.0E+00
   47   48  6.036E+04  0.000E+00  0.000E+00  0.000E+00  2.466E-08  0.000E+00  0.000E+00   0.0E+00
   47   49  6.134E+04  0.000E+00  0.000E+00  0.000E+00  1.193E-07  9.470E-02  0.000E+00   0.0E+00
   47   51  4.121E+03  0.000E+00  0.000E+00  0.000E+00  2.132E-04  1.206E-01  0.000E+00   0.0E+00
   47   53  2.521E+03  0.000E+00  0.000E+00  0.000E+00  0.000E+00  0.000E+00  4.730E-07   0.0E+00
   47   54  2.359E+03  6.782E+06  7.274E-03  3.954E-01  0.000E+00  0.000E+00  1.624E-04   1.4E+00
   47   55  2.323E+03  8.435E+06  4.875E-03  2.610E-01  0.000E+00  0.000E+00  2.546E-04   6.6E-02
   47   56  2.245E+03  5.462E+05  4.127E-04  2.135E-02  0.000E+00  0.000E+00  3.002E-06   2.8E+00
   47   57  2.093E+03  8.828E+02  4.141E-07  1.997E-05  0.000E+00  0.000E+00  6.329E-06   2.6E+02
   47   58  2.024E+03  3.673E+04  2.257E-05  1.053E-03  0.000E+00  0.000E+00  4.215E-06   5.5E+01
   47   59  1.628E+03  0.000E+00  0.000E+00  0.000E+00  0.000E+00  0.000E+00  4.718E-04   0.0E+00
   47   60  1.238E+03  0.000E+00  0.000E+00  0.000E+00  2.663E+01  0.000E+00  0.000E+00   0.0E+00
   47   61  1.238E+03  0.000E+00  0.000E+00  0.000E+00  2.057E+00  1.827E-02  0.000E+00   0.0E+00
   47   62  1.222E+03  6.255E+03  1.001E-06  2.820E-05  0.000E+00  0.000E+00  9.896E-06   7.3E-01
   47   63  1.197E+03  0.000E+00  0.000E+00  0.000E+00  8.161E-02  3.705E-01  0.000E+00   0.0E+00
   47   64  1.194E+03  0.000E+00  0.000E+00  0.000E+00  3.153E-01  9.927E+00  0.000E+00   0.0E+00
   47   65  1.208E+03  1.265E+07  1.978E-03  5.509E-02  0.000E+00  0.000E+00  1.934E-03   6.5E-02
   47   66  1.189E+03  7.140E+05  1.514E-04  4.148E-03  0.000E+00  0.000E+00  3.692E-04   2.3E-03
   47   67  1.169E+03  0.000E+00  0.000E+00  0.000E+00  1.334E+00  2.422E+00  0.000E+00   0.0E+00
   47   68  1.166E+03  0.000E+00  0.000E+00  0.000E+00  6.886E+00  1.978E+01  0.000E+00   0.0E+00
   47   69  1.150E+03  0.000E+00  0.000E+00  0.000E+00  1.688E+00  0.000E+00  0.000E+00   0.0E+00
   47   70  1.150E+03  0.000E+00  0.000E+00  0.000E+00  6.319E+00  2.335E+01  0.000E+00   0.0E+00
   47   71  1.012E+03  0.000E+00  0.000E+00  0.000E+00  0.000E+00  0.000E+00  4.769E-03   0.0E+00
   47   72  8.365E+02  0.000E+00  0.000E+00  0.000E+00  8.113E-01  6.634E-01  0.000E+00   0.0E+00
   47   73  8.346E+02  0.000E+00  0.000E+00  0.000E+00  5.745E+00  1.180E+01  0.000E+00   0.0E+00
   47   74  8.174E+02  0.000E+00  0.000E+00  0.000E+00  5.894E+00  2.818E+00  0.000E+00   0.0E+00
   47   75  8.156E+02  0.000E+00  0.000E+00  0.000E+00  2.524E+01  4.567E+01  0.000E+00   0.0E+00
   47   76  2.965E+02  6.142E+08  5.784E-03  3.953E-02  0.000E+00  0.000E+00  2.544E-01   9.3E-01
   47   77  2.950E+02  0.000E+00  0.000E+00  0.000E+00  0.000E+00  0.000E+00  8.979E-01   0.0E+00
   47   78  2.694E+02  0.000E+00  0.000E+00  0.000E+00  4.620E+04  0.000E+00  0.000E+00   0.0E+00
   47   79  2.673E+02  0.000E+00  0.000E+00  0.000E+00  1.452E+04  6.105E-01  0.000E+00   0.0E+00
   47   80  2.671E+02  0.000E+00  0.000E+00  0.000E+00  1.431E+04  2.643E-03  0.000E+00   0.0E+00
   47   81  2.660E+02  0.000E+00  0.000E+00  0.000E+00  3.555E+03  0.000E+00  0.000E+00   0.0E+00
   47   83  2.652E+02  0.000E+00  0.000E+00  0.000E+00  1.822E+04  8.871E-05  0.000E+00   0.0E+00
   47   84  2.660E+02  0.000E+00  0.000E+00  0.000E+00  0.000E+00  0.000E+00  2.457E-03   0.0E+00
   47   86  2.432E+02  0.000E+00  0.000E+00  0.000E+00  5.545E+01  0.000E+00  0.000E+00   0.0E+00
   47   87  2.423E+02  0.000E+00  0.000E+00  0.000E+00  3.929E+03  0.000E+00  0.000E+00   0.0E+00
   47   88  2.419E+02  0.000E+00  0.000E+00  0.000E+00  5.320E+02  1.997E+00  0.000E+00   0.0E+00
   47   90  2.398E+02  0.000E+00  0.000E+00  0.000E+00  0.000E+00  0.000E+00  1.462E-02   0.0E+00
   47   91  2.391E+02  1.016E+09  1.120E-02  6.169E-02  0.000E+00  0.000E+00  1.657E+00   9.5E-01
   47   92  2.388E+02  3.156E+05  1.927E-06  1.060E-05  0.000E+00  0.000E+00  6.202E-02   1.1E+03
   47   93  2.385E+02  1.836E+08  1.566E-03  8.605E-03  0.000E+00  0.000E+00  2.215E-02   6.1E-01
   47   94  2.376E+02  2.793E+07  1.689E-04  9.246E-04  0.000E+00  0.000E+00  7.677E-02   2.2E-01
   47   95  2.372E+02  2.624E+08  2.213E-03  1.210E-02  0.000E+00  0.000E+00  1.638E+00   2.8E-01
   47   97  2.331E+02  0.000E+00  0.000E+00  0.000E+00  0.000E+00  0.000E+00  5.306E-02   0.0E+00
   47   98  2.285E+02  0.000E+00  0.000E+00  0.000E+00  3.820E+03  0.000E+00  0.000E+00   0.0E+00
   47   99  2.285E+02  0.000E+00  0.000E+00  0.000E+00  1.778E+05  0.000E+00  0.000E+00   0.0E+00
   47  100  2.285E+02  0.000E+00  0.000E+00  0.000E+00  1.612E+04  5.404E-03  0.000E+00   0.0E+00
   47  101  2.284E+02  0.000E+00  0.000E+00  0.000E+00  1.855E+04  3.227E+00  0.000E+00   0.0E+00
   47  102  2.280E+02  0.000E+00  0.000E+00  0.000E+00  3.688E+04  3.382E+00  0.000E+00   0.0E+00
   47  103  2.279E+02  0.000E+00  0.000E+00  0.000E+00  3.481E+03  7.763E-01  0.000E+00   0.0E+00
   47  104  2.278E+02  4.396E+07  2.443E-04  1.282E-03  0.000E+00  0.000E+00  3.385E-02   1.0E+00
   47  105  2.278E+02  0.000E+00  0.000E+00  0.000E+00  4.891E+03  1.347E-01  0.000E+00   0.0E+00
   47  106  2.278E+02  6.459E+08  5.023E-03  2.637E-02  0.000E+00  0.000E+00  7.815E+00   1.0E+00
   47  107  2.277E+02  0.000E+00  0.000E+00  0.000E+00  3.859E+04  1.842E+00  0.000E+00   0.0E+00
   47  108  2.276E+02  0.000E+00  0.000E+00  0.000E+00  0.000E+00  0.000E+00  4.811E-04   0.0E+00
   47  110  2.274E+02  1.861E+08  1.442E-03  7.556E-03  0.000E+00  0.000E+00  5.973E-02   1.0E+00
   47  111  2.274E+02  4.266E+09  4.250E-02  2.227E-01  0.000E+00  0.000E+00  1.766E+01   1.0E+00
   47  112  2.272E+02  5.532E+06  5.504E-05  2.882E-04  0.000E+00  0.000E+00  3.374E-01   1.0E+00
   47  113  2.272E+02  0.000E+00  0.000E+00  0.000E+00  0.000E+00  0.000E+00  2.476E+00   0.0E+00
   47  114  2.189E+02  5.406E+05  2.775E-06  1.400E-05  0.000E+00  0.000E+00  1.519E-02   1.3E+00
   47  115  2.188E+02  1.284E+08  6.583E-04  3.319E-03  0.000E+00  0.000E+00  6.102E-01   6.1E-01
   47  116  2.184E+02  9.214E+06  6.589E-05  3.316E-04  0.000E+00  0.000E+00  7.060E-02   2.8E-01
   47  117  2.155E+02  0.000E+00  0.000E+00  0.000E+00  0.000E+00  0.000E+00  3.716E-01   0.0E+00
   47  118  2.101E+02  0.000E+00  0.000E+00  0.000E+00  2.001E+00  6.806E-02  0.000E+00   0.0E+00
   47  119  2.101E+02  0.000E+00  0.000E+00  0.000E+00  5.267E+01  7.534E-01  0.000E+00   0.0E+00
   47  120  2.099E+02  0.000E+00  0.000E+00  0.000E+00  2.105E+03  3.537E+00  0.000E+00   0.0E+00
   47  121  2.099E+02  0.000E+00  0.000E+00  0.000E+00  4.784E+02  2.884E-01  0.000E+00   0.0E+00
   47  122  2.094E+02  1.452E+08  9.548E-04  4.608E-03  0.000E+00  0.000E+00  1.084E-02   1.0E+00
   47  123  2.094E+02  3.024E+09  2.557E-02  1.234E-01  0.000E+00  0.000E+00  2.036E+01   1.0E+00
   47  124  2.094E+02  2.423E+07  2.048E-04  9.883E-04  0.000E+00  0.000E+00  3.768E-01   1.0E+00
   47  125  2.094E+02  0.000E+00  0.000E+00  0.000E+00  0.000E+00  0.000E+00  5.913E-01   0.0E+00
   48   49  3.792E+06  0.000E+00  0.000E+00  0.000E+00  3.719E-16  6.841E-07  0.000E+00   0.0E+00
   48   50  5.273E+03  0.000E+00  0.000E+00  0.000E+00  0.000E+00  7.333E-01  0.000E+00   0.0E+00
   48   51  4.423E+03  0.000E+00  0.000E+00  0.000E+00  7.606E-04  4.515E-01  0.000E+00   0.0E+00
   48   52  2.778E+03  6.462E+06  2.491E-03  6.834E-02  0.000E+00  0.000E+00  0.000E+00   3.9E-01
   48   53  2.631E+03  2.632E+06  2.731E-03  7.095E-02  0.000E+00  0.000E+00  1.573E-05   1.3E-01
   48   55  2.416E+03  2.069E+05  3.017E-04  7.200E-03  0.000E+00  0.000E+00  2.782E-06   1.9E-02
   48   56  2.332E+03  0.000E+00  0.000E+00  0.000E+00  0.000E+00  0.000E+00  6.085E-07   0.0E+00
   48   57  2.168E+03  2.213E+06  2.599E-03  5.565E-02  0.000E+00  0.000E+00  7.782E-06   1.1E+00
   48   58  2.095E+03  0.000E+00  0.000E+00  0.000E+00  0.000E+00  0.000E+00  1.295E-05   0.0E+00
   48   59  1.673E+03  1.492E+06  6.259E-04  1.034E-02  0.000E+00  0.000E+00  1.812E-06   2.2E+00
   48   62  1.248E+03  2.257E+08  8.779E-02  1.082E+00  0.000E+00  0.000E+00  3.502E-04   1.1E+00
   48   63  1.221E+03  0.000E+00  0.000E+00  0.000E+00  5.197E+00  0.000E+00  0.000E+00   0.0E+00
   48   65  1.233E+03  2.121E+07  8.060E-03  9.816E-02  0.000E+00  0.000E+00  1.306E-04   1.0E+00
   48   66  1.213E+03  0.000E+00  0.000E+00  0.000E+00  0.000E+00  0.000E+00  8.619E-03   0.0E+00
   48   67  1.192E+03  0.000E+00  0.000E+00  0.000E+00  2.073E+00  6.741E-04  0.000E+00   0.0E+00
   48   68  1.188E+03  0.000E+00  0.000E+00  0.000E+00  2.334E-01  0.000E+00  0.000E+00   0.0E+00
   48   69  1.173E+03  0.000E+00  0.000E+00  0.000E+00  3.993E+00  6.302E-05  0.000E+00   0.0E+00
   48   70  1.172E+03  0.000E+00  0.000E+00  0.000E+00  3.443E+00  4.741E-02  0.000E+00   0.0E+00
   48   71  1.029E+03  3.897E+07  6.188E-03  6.290E-02  0.000E+00  0.000E+00  1.116E-03   8.4E-01
   48   72  8.483E+02  0.000E+00  0.000E+00  0.000E+00  8.329E+02  0.000E+00  0.000E+00   0.0E+00
   48   74  8.286E+02  0.000E+00  0.000E+00  0.000E+00  1.189E+02  6.687E+01  0.000E+00   0.0E+00
   48   75  8.268E+02  0.000E+00  0.000E+00  0.000E+00  6.642E+01  0.000E+00  0.000E+00   0.0E+00
   48   76  2.980E+02  1.756E+06  3.898E-05  1.147E-04  0.000E+00  0.000E+00  1.294E-02   1.0E+00
   48   77  2.965E+02  4.516E+07  5.950E-04  1.742E-03  0.000E+00  0.000E+00  6.338E-03   9.3E-01
   48   78  2.706E+02  0.000E+00  0.000E+00  0.000E+00  3.443E+03  2.628E-04  0.000E+00   0.0E+00
   48   79  2.685E+02  0.000E+00  0.000E+00  0.000E+00  1.202E+03  6.192E-01  0.000E+00   0.0E+00
   48   80  2.683E+02  0.000E+00  0.000E+00  0.000E+00  1.096E+02  0.000E+00  0.000E+00   0.0E+00
   48   81  2.671E+02  0.000E+00  0.000E+00  0.000E+00  4.900E+02  1.683E-01  0.000E+00   0.0E+00
   48   82  2.679E+02  6.398E+09  2.294E-02  6.069E-02  0.000E+00  0.000E+00  0.000E+00   9.9E-01
   48   83  2.664E+02  0.000E+00  0.000E+00  0.000E+00  7.650E+02  5.276E-03  0.000E+00   0.0E+00
   48   84  2.672E+02  7.332E+08  7.849E-03  2.072E-02  0.000E+00  0.000E+00  7.772E-01   1.0E+00
   48   85  2.585E+02  0.000E+00  0.000E+00  0.000E+00  0.000E+00  4.152E-01  0.000E+00   0.0E+00
   48   86  2.442E+02  0.000E+00  0.000E+00  0.000E+00  4.293E+04  2.223E-01  0.000E+00   0.0E+00
   48   87  2.433E+02  0.000E+00  0.000E+00  0.000E+00  3.244E+05  7.162E-01  0.000E+00   0.0E+00
   48   88  2.429E+02  0.000E+00  0.000E+00  0.000E+00  5.362E+04  2.414E+00  0.000E+00   0.0E+00
   48   89  2.414E+02  4.032E+07  1.174E-04  2.797E-04  0.000E+00  0.000E+00  0.000E+00   7.7E+00
   48   90  2.407E+02  1.604E+07  1.393E-04  3.312E-04  0.000E+00  0.000E+00  2.537E-03   5.5E+00
   48   92  2.397E+02  3.451E+06  4.956E-05  1.173E-04  0.000E+00  0.000E+00  2.718E-03   6.3E-01
   48   93  2.394E+02  0.000E+00  0.000E+00  0.000E+00  0.000E+00  0.000E+00  1.318E-02   0.0E+00
   48   94  2.386E+02  9.084E+07  1.292E-03  3.043E-03  0.000E+00  0.000E+00  8.369E-03   1.3E+00
   48   95  2.381E+02  0.000E+00  0.000E+00  0.000E+00  0.000E+00  0.000E+00  7.618E-02   0.0E+00
   48   96  2.369E+02  0.000E+00  0.000E+00  0.000E+00  0.000E+00  1.081E-01  0.000E+00   0.0E+00
   48   97  2.340E+02  1.208E+08  9.915E-04  2.292E-03  0.000E+00  0.000E+00  1.121E-01   5.7E-01
   48   98  2.294E+02  0.000E+00  0.000E+00  0.000E+00  1.104E+04  9.419E-05  0.000E+00   0.0E+00
   48  101  2.293E+02  0.000E+00  0.000E+00  0.000E+00  9.659E+03  6.986E-05  0.000E+00   0.0E+00
   48  102  2.288E+02  0.000E+00  0.000E+00  0.000E+00  1.691E+01  0.000E+00  0.000E+00   0.0E+00
   48  103  2.287E+02  0.000E+00  0.000E+00  0.000E+00  2.173E+02  1.681E-02  0.000E+00   0.0E+00
   48  104  2.286E+02  6.487E+09  8.474E-02  1.914E-01  0.000E+00  0.000E+00  4.935E+00   1.0E+00
   48  105  2.286E+02  0.000E+00  0.000E+00  0.000E+00  1.372E+04  0.000E+00  0.000E+00   0.0E+00
   48  106  2.286E+02  0.000E+00  0.000E+00  0.000E+00  0.000E+00  0.000E+00  2.377E+00   0.0E+00
   48  110  2.282E+02  0.000E+00  0.000E+00  0.000E+00  0.000E+00  0.000E+00  3.738E+00   0.0E+00
   48  114  2.198E+02  4.505E+09  5.435E-02  1.180E-01  0.000E+00  0.000E+00  2.433E-01   9.4E-01
   48  115  2.196E+02  5.994E+08  7.222E-03  1.566E-02  0.000E+00  0.000E+00  1.165E-01   9.4E-01
   48  116  2.192E+02  0.000E+00  0.000E+00  0.000E+00  0.000E+00  0.000E+00  4.627E+00   0.0E+00
   48  117  2.163E+02  4.950E+08  3.472E-03  7.416E-03  0.000E+00  0.000E+00  2.499E-01   9.9E-01
   48  118  2.109E+02  0.000E+00  0.000E+00  0.000E+00  1.070E+06  0.000E+00  0.000E+00   0.0E+00
   48  120  2.107E+02  0.000E+00  0.000E+00  0.000E+00  9.818E+04  0.000E+00  0.000E+00   0.0E+00
   48  121  2.106E+02  0.000E+00  0.000E+00  0.000E+00  1.636E+05  4.067E+00  0.000E+00   0.0E+00
   48  122  2.102E+02  0.000E+00  0.000E+00  0.000E+00  0.000E+00  0.000E+00  2.042E-05   0.0E+00
   49   50  5.265E+03  0.000E+00  0.000E+00  0.000E+00  1.279E-01  0.000E+00  0.000E+00   0.0E+00
   49   51  4.417E+03  0.000E+00  0.000E+00  0.000E+00  2.384E-03  1.432E-01  0.000E+00   0.0E+00
   49   52  2.776E+03  0.000E+00  0.000E+00  0.000E+00  0.000E+00  0.000E+00  2.544E-07   0.0E+00
   49   53  2.629E+03  4.607E+06  2.864E-03  1.239E-01  0.000E+00  0.000E+00  4.220E-05   3.1E-01
   49   54  2.453E+03  0.000E+00  0.000E+00  0.000E+00  0.000E+00  0.000E+00  7.008E-06   0.0E+00
   49   55  2.415E+03  2.005E+06  1.752E-03  6.965E-02  0.000E+00  0.000E+00  6.756E-05   5.3E-02
   49   56  2.330E+03  3.572E+06  4.072E-03  1.562E-01  0.000E+00  0.000E+00  2.233E-05   1.3E+00
   49   57  2.167E+03  3.109E+05  2.188E-04  7.804E-03  0.000E+00  0.000E+00  5.064E-07   4.9E+00
   49   58  2.094E+03  1.026E+05  9.442E-05  3.254E-03  0.000E+00  0.000E+00  4.231E-05   2.6E-02
   49   59  1.672E+03  4.815E+03  1.211E-06  3.335E-05  0.000E+00  0.000E+00  1.542E-04   4.0E+02
   49   61  1.263E+03  0.000E+00  0.000E+00  0.000E+00  6.180E+00  0.000E+00  0.000E+00   0.0E+00
   49   62  1.247E+03  3.665E+07  8.550E-03  1.755E-01  0.000E+00  0.000E+00  2.181E-05   8.8E-01
   49   63  1.221E+03  0.000E+00  0.000E+00  0.000E+00  4.907E-01  3.390E+00  0.000E+00   0.0E+00
   49   64  1.218E+03  0.000E+00  0.000E+00  0.000E+00  3.127E+00  0.000E+00  0.000E+00   0.0E+00
   49   65  1.233E+03  3.607E+07  8.217E-03  1.667E-01  0.000E+00  0.000E+00  6.644E-03   8.2E-01
   49   66  1.213E+03  2.594E+08  8.008E-02  1.599E+00  0.000E+00  0.000E+00  2.265E-02   1.1E+00
   49   67  1.191E+03  0.000E+00  0.000E+00  0.000E+00  2.949E-01  6.496E+00  0.000E+00   0.0E+00
   49   68  1.188E+03  0.000E+00  0.000E+00  0.000E+00  2.998E+00  1.961E-01  0.000E+00   0.0E+00
   49   69  1.172E+03  0.000E+00  0.000E+00  0.000E+00  8.361E+00  8.599E+00  0.000E+00   0.0E+00
   49   70  1.172E+03  0.000E+00  0.000E+00  0.000E+00  1.364E+00  9.876E-01  0.000E+00   0.0E+00
   49   71  1.029E+03  5.249E+05  4.999E-05  8.466E-04  0.000E+00  0.000E+00  1.580E-05   1.6E+01
   49   72  8.481E+02  0.000E+00  0.000E+00  0.000E+00  1.685E+02  4.321E+00  0.000E+00   0.0E+00
   49   73  8.462E+02  0.000E+00  0.000E+00  0.000E+00  9.058E+02  0.000E+00  0.000E+00   0.0E+00
   49   74  8.284E+02  0.000E+00  0.000E+00  0.000E+00  2.572E+01  3.726E+01  0.000E+00   0.0E+00
   49   75  8.266E+02  0.000E+00  0.000E+00  0.000E+00  2.124E+02  2.884E+01  0.000E+00   0.0E+00
   49   76  2.980E+02  4.996E+07  6.651E-04  3.263E-03  0.000E+00  0.000E+00  2.673E-03   9.8E-01
   49   77  2.965E+02  1.767E+08  1.397E-03  6.818E-03  0.000E+00  0.000E+00  8.732E-05   9.3E-01
   49   78  2.706E+02  0.000E+00  0.000E+00  0.000E+00  9.197E+03  9.989E-02  0.000E+00   0.0E+00
   49   79  2.685E+02  0.000E+00  0.000E+00  0.000E+00  7.065E+02  2.750E-03  0.000E+00   0.0E+00
   49   80  2.683E+02  0.000E+00  0.000E+00  0.000E+00  2.448E+03  1.121E+00  0.000E+00   0.0E+00
   49   81  2.671E+02  0.000E+00  0.000E+00  0.000E+00  8.227E+03  7.109E-02  0.000E+00   0.0E+00
   49   82  2.678E+02  0.000E+00  0.000E+00  0.000E+00  0.000E+00  0.000E+00  8.514E+00   0.0E+00
   49   83  2.664E+02  0.000E+00  0.000E+00  0.000E+00  4.654E+03  3.169E-02  0.000E+00   0.0E+00
   49   84  2.672E+02  4.434E+09  2.848E-02  1.252E-01  0.000E+00  0.000E+00  4.085E+00   9.9E-01
   49   85  2.585E+02  0.000E+00  0.000E+00  0.000E+00  8.990E+04  0.000E+00  0.000E+00   0.0E+00
   49   86  2.441E+02  0.000E+00  0.000E+00  0.000E+00  1.923E+05  1.013E+01  0.000E+00   0.0E+00
   49   87  2.432E+02  0.000E+00  0.000E+00  0.000E+00  1.032E+05  2.294E-02  0.000E+00   0.0E+00
   49   88  2.429E+02  0.000E+00  0.000E+00  0.000E+00  1.539E+05  7.462E-02  0.000E+00   0.0E+00
   49   89  2.413E+02  0.000E+00  0.000E+00  0.000E+00  0.000E+00  0.000E+00  5.829E-02   0.0E+00
   49   90  2.407E+02  8.021E+06  4.180E-05  1.656E-04  0.000E+00  0.000E+00  8.855E-03   2.8E+01
   49   91  2.400E+02  0.000E+00  0.000E+00  0.000E+00  0.000E+00  0.000E+00  1.720E-01   0.0E+00
   49   92  2.397E+02  1.752E+07  1.509E-04  5.954E-04  0.000E+00  0.000E+00  2.502E-02   2.1E+00
   49   93  2.394E+02  3.480E+08  4.186E-03  1.650E-02  0.000E+00  0.000E+00  5.745E-02   1.0E+00
   49   94  2.385E+02  1.529E+08  1.304E-03  5.121E-03  0.000E+00  0.000E+00  2.499E-03   4.6E-01
   49   95  2.381E+02  5.759E+06  6.853E-05  2.686E-04  0.000E+00  0.000E+00  4.158E-02   1.2E-02
   49   96  2.369E+02  0.000E+00  0.000E+00  0.000E+00  3.787E+05  0.000E+00  0.000E+00   0.0E+00
   49   97  2.340E+02  7.707E+07  3.796E-04  1.462E-03  0.000E+00  0.000E+00  9.192E-02   7.5E-02
   49   98  2.294E+02  0.000E+00  0.000E+00  0.000E+00  2.246E+04  1.543E+00  0.000E+00   0.0E+00
   49  100  2.293E+02  0.000E+00  0.000E+00  0.000E+00  4.318E+04  0.000E+00  0.000E+00   0.0E+00
   49  101  2.292E+02  0.000E+00  0.000E+00  0.000E+00  7.192E+03  3.365E-01  0.000E+00   0.0E+00
   49  102  2.288E+02  0.000E+00  0.000E+00  0.000E+00  2.078E+03  4.635E-02  0.000E+00   0.0E+00
   49  103  2.287E+02  0.000E+00  0.000E+00  0.000E+00  5.415E+03  1.035E+00  0.000E+00   0.0E+00
   49  104  2.286E+02  1.221E+09  9.569E-03  3.601E-02  0.000E+00  0.000E+00  1.933E+00   1.0E+00
   49  105  2.286E+02  0.000E+00  0.000E+00  0.000E+00  1.672E+04  5.982E-01  0.000E+00   0.0E+00
   49  106  2.286E+02  3.580E+09  3.927E-02  1.478E-01  0.000E+00  0.000E+00  1.874E+01   1.0E+00
   49  107  2.286E+02  0.000E+00  0.000E+00  0.000E+00  3.037E+03  0.000E+00  0.000E+00   0.0E+00
   49  110  2.282E+02  1.427E+09  1.560E-02  5.859E-02  0.000E+00  0.000E+00  4.407E-02   1.0E+00
   49  111  2.282E+02  0.000E+00  0.000E+00  0.000E+00  0.000E+00  0.000E+00  2.268E-01   0.0E+00
   49  112  2.280E+02  0.000E+00  0.000E+00  0.000E+00  0.000E+00  0.000E+00  8.162E-01   0.0E+00
   49  114  2.197E+02  5.818E+08  4.212E-03  1.523E-02  0.000E+00  0.000E+00  3.588E-02   1.2E+00
   49  115  2.196E+02  5.346E+08  3.864E-03  1.397E-02  0.000E+00  0.000E+00  4.476E+00   1.2E+00
   49  116  2.192E+02  4.958E+09  5.000E-02  1.804E-01  0.000E+00  0.000E+00  1.256E+01   9.4E-01
   49  117  2.163E+02  2.881E+08  1.212E-03  4.315E-03  0.000E+00  0.000E+00  5.725E-04   1.1E-01
   49  118  2.109E+02  0.000E+00  0.000E+00  0.000E+00  1.863E+05  3.445E-01  0.000E+00   0.0E+00
   49  119  2.108E+02  0.000E+00  0.000E+00  0.000E+00  1.178E+06  0.000E+00  0.000E+00   0.0E+00
   49  120  2.107E+02  0.000E+00  0.000E+00  0.000E+00  2.300E+05  1.716E+00  0.000E+00   0.0E+00
   49  121  2.106E+02  0.000E+00  0.000E+00  0.000E+00  6.544E+04  2.691E+00  0.000E+00   0.0E+00
   49  122  2.102E+02  1.060E+09  9.825E-03  3.399E-02  0.000E+00  0.000E+00  1.408E+00   1.0E+00
   49  123  2.101E+02  0.000E+00  0.000E+00  0.000E+00  0.000E+00  0.000E+00  6.998E-01   0.0E+00
   49  124  2.101E+02  0.000E+00  0.000E+00  0.000E+00  0.000E+00  0.000E+00  2.746E-01   0.0E+00
   50   51  2.743E+04  0.000E+00  0.000E+00  0.000E+00  7.373E-06  0.000E+00  0.000E+00   0.0E+00
   50   53  5.251E+03  1.975E+03  2.449E-05  4.234E-04  0.000E+00  0.000E+00  0.000E+00   2.3E+01
   50   55  4.460E+03  0.000E+00  0.000E+00  0.000E+00  0.000E+00  0.000E+00  1.631E-05   0.0E+00
   50   57  3.682E+03  0.000E+00  0.000E+00  0.000E+00  0.000E+00  0.000E+00  6.170E-06   0.0E+00
   50   59  2.451E+03  3.143E+06  8.491E-03  6.851E-02  0.000E+00  0.000E+00  0.000E+00   2.5E-01
   50   62  1.635E+03  0.000E+00  0.000E+00  0.000E+00  0.000E+00  0.000E+00  4.713E-04   0.0E+00
   50   65  1.610E+03  0.000E+00  0.000E+00  0.000E+00  0.000E+00  0.000E+00  1.424E-03   0.0E+00
   50   67  1.540E+03  0.000E+00  0.000E+00  0.000E+00  1.104E+01  0.000E+00  0.000E+00   0.0E+00
   50   69  1.508E+03  0.000E+00  0.000E+00  0.000E+00  0.000E+00  1.387E-03  0.000E+00   0.0E+00
   50   70  1.508E+03  0.000E+00  0.000E+00  0.000E+00  1.573E+01  0.000E+00  0.000E+00   0.0E+00
   50   71  1.279E+03  5.547E+08  4.080E-01  1.718E+00  0.000E+00  0.000E+00  0.000E+00   8.7E-01
   50   74  9.831E+02  0.000E+00  0.000E+00  0.000E+00  6.651E+02  0.000E+00  0.000E+00   0.0E+00
   50   76  3.159E+02  0.000E+00  0.000E+00  0.000E+00  0.000E+00  0.000E+00  1.136E+00   0.0E+00
   50   77  3.141E+02  1.800E+09  7.990E-02  8.263E-02  0.000E+00  0.000E+00  0.000E+00   7.5E-01
   50   78  2.852E+02  0.000E+00  0.000E+00  0.000E+00  0.000E+00  7.177E+00  0.000E+00   0.0E+00
   50   79  2.829E+02  0.000E+00  0.000E+00  0.000E+00  4.838E+04  0.000E+00  0.000E+00   0.0E+00
   50   81  2.814E+02  0.000E+00  0.000E+00  0.000E+00  0.000E+00  3.735E+00  0.000E+00   0.0E+00
   50   83  2.806E+02  0.000E+00  0.000E+00  0.000E+00  4.642E+04  0.000E+00  0.000E+00   0.0E+00
   50   84  2.815E+02  3.977E+09  1.417E-01  1.313E-01  0.000E+00  0.000E+00  0.000E+00   8.5E-01
   50   86  2.560E+02  0.000E+00  0.000E+00  0.000E+00  0.000E+00  4.235E-03  0.000E+00   0.0E+00
   50   87  2.550E+02  0.000E+00  0.000E+00  0.000E+00  0.000E+00  2.591E+01  0.000E+00   0.0E+00
   50   88  2.546E+02  0.000E+00  0.000E+00  0.000E+00  2.766E+05  0.000E+00  0.000E+00   0.0E+00
   50   90  2.522E+02  1.420E+05  4.064E-06  3.375E-06  0.000E+00  0.000E+00  0.000E+00   5.3E+00
   50   92  2.511E+02  0.000E+00  0.000E+00  0.000E+00  0.000E+00  0.000E+00  6.284E+00   0.0E+00
   50   94  2.499E+02  0.000E+00  0.000E+00  0.000E+00  0.000E+00  0.000E+00  1.118E+00   0.0E+00
   50   97  2.449E+02  1.812E+09  4.888E-02  3.941E-02  0.000E+00  0.000E+00  0.000E+00   1.0E+00
   50   98  2.399E+02  0.000E+00  0.000E+00  0.000E+00  0.000E+00  3.697E-03  0.000E+00   0.0E+00
   50  101  2.397E+02  0.000E+00  0.000E+00  0.000E+00  1.961E+05  0.000E+00  0.000E+00   0.0E+00
   50  103  2.391E+02  0.000E+00  0.000E+00  0.000E+00  4.006E+05  0.000E+00  0.000E+00   0.0E+00
   50  104  2.390E+02  0.000E+00  0.000E+00  0.000E+00  0.000E+00  0.000E+00  1.048E-04   0.0E+00
   50  114  2.293E+02  0.000E+00  0.000E+00  0.000E+00  0.000E+00  0.000E+00  8.342E-01   0.0E+00
   50  115  2.291E+02  0.000E+00  0.000E+00  0.000E+00  0.000E+00  0.000E+00  4.631E+00   0.0E+00
   50  117  2.255E+02  1.046E+10  2.393E-01  1.777E-01  0.000E+00  0.000E+00  0.000E+00   1.0E+00
   50  121  2.194E+02  0.000E+00  0.000E+00  0.000E+00  1.617E+06  0.000E+00  0.000E+00   0.0E+00
   51   52  7.468E+03  0.000E+00  0.000E+00  0.000E+00  0.000E+00  0.000E+00  4.131E-07   0.0E+00
   51   53  6.494E+03  6.370E+03  2.416E-05  2.583E-03  0.000E+00  0.000E+00  7.366E-07   3.9E-02
   51   54  5.518E+03  0.000E+00  0.000E+00  0.000E+00  0.000E+00  0.000E+00  2.952E-07   0.0E+00
   51   55  5.326E+03  6.315E+03  2.685E-05  2.354E-03  0.000E+00  0.000E+00  1.159E-06   2.2E-01
   51   56  4.932E+03  7.623E+04  3.893E-04  3.161E-02  0.000E+00  0.000E+00  5.431E-11   3.9E+00
   51   57  4.253E+03  2.152E+04  5.835E-05  4.085E-03  0.000E+00  0.000E+00  2.593E-07   7.8E-01
   51   58  3.979E+03  2.038E+05  6.775E-04  4.437E-02  0.000E+00  0.000E+00  1.292E-06   3.0E+00
   51   59  2.691E+03  4.075E+06  2.655E-03  1.176E-01  0.000E+00  0.000E+00  4.859E-05   3.9E-01
   51   61  1.769E+03  0.000E+00  0.000E+00  0.000E+00  9.601E-01  0.000E+00  0.000E+00   0.0E+00
   51   62  1.738E+03  2.674E+05  1.211E-04  3.465E-03  0.000E+00  0.000E+00  1.959E-05   2.6E+00
   51   63  1.687E+03  0.000E+00  0.000E+00  0.000E+00  2.506E-01  3.361E+00  0.000E+00   0.0E+00
   51   64  1.682E+03  0.000E+00  0.000E+00  0.000E+00  4.010E-01  0.000E+00  0.000E+00   0.0E+00
   51   65  1.710E+03  2.931E+05  1.285E-04  3.617E-03  0.000E+00  0.000E+00  7.557E-05   2.4E+00
   51   66  1.672E+03  1.049E+07  6.154E-03  1.693E-01  0.000E+00  0.000E+00  4.117E-04   1.3E+00
   51   67  1.631E+03  0.000E+00  0.000E+00  0.000E+00  1.205E+00  6.639E+00  0.000E+00   0.0E+00
   51   68  1.625E+03  0.000E+00  0.000E+00  0.000E+00  1.511E-01  4.116E-01  0.000E+00   0.0E+00
   51   69  1.596E+03  0.000E+00  0.000E+00  0.000E+00  4.505E-05  1.015E+01  0.000E+00   0.0E+00
   51   70  1.595E+03  0.000E+00  0.000E+00  0.000E+00  1.585E+00  9.765E-01  0.000E+00   0.0E+00
   51   71  1.341E+03  3.880E+07  6.280E-03  1.387E-01  0.000E+00  0.000E+00  9.337E-04   5.4E-01
   51   72  1.050E+03  0.000E+00  0.000E+00  0.000E+00  8.324E-01  5.432E+00  0.000E+00   0.0E+00
   51   73  1.047E+03  0.000E+00  0.000E+00  0.000E+00  2.975E+01  0.000E+00  0.000E+00   0.0E+00
   51   74  1.020E+03  0.000E+00  0.000E+00  0.000E+00  1.058E+01  8.585E+00  0.000E+00   0.0E+00
   51   75  1.017E+03  0.000E+00  0.000E+00  0.000E+00  1.475E+00  4.770E+01  0.000E+00   0.0E+00
   51   76  3.195E+02  1.900E+04  2.908E-07  1.530E-06  0.000E+00  0.000E+00  3.929E-02   1.8E+00
   51   77  3.178E+02  2.030E+08  1.844E-03  9.645E-03  0.000E+00  0.000E+00  3.257E-02   9.5E-01
   51   78  2.882E+02  0.000E+00  0.000E+00  0.000E+00  4.103E+01  5.326E-02  0.000E+00   0.0E+00
   51   79  2.858E+02  0.000E+00  0.000E+00  0.000E+00  2.872E+03  2.277E-02  0.000E+00   0.0E+00
   51   80  2.856E+02  0.000E+00  0.000E+00  0.000E+00  1.298E-01  8.979E-02  0.000E+00   0.0E+00
   51   81  2.843E+02  0.000E+00  0.000E+00  0.000E+00  3.547E+03  1.256E-02  0.000E+00   0.0E+00
   51   82  2.851E+02  0.000E+00  0.000E+00  0.000E+00  0.000E+00  0.000E+00  6.417E-01   0.0E+00
   51   83  2.835E+02  0.000E+00  0.000E+00  0.000E+00  2.701E+03  2.995E-01  0.000E+00   0.0E+00
   51   84  2.844E+02  4.812E+08  3.501E-03  1.639E-02  0.000E+00  0.000E+00  3.172E-01   9.9E-01
   51   85  2.746E+02  0.000E+00  0.000E+00  0.000E+00  1.418E+04  0.000E+00  0.000E+00   0.0E+00
   51   86  2.584E+02  0.000E+00  0.000E+00  0.000E+00  1.811E+04  2.335E-03  0.000E+00   0.0E+00
   51   87  2.574E+02  0.000E+00  0.000E+00  0.000E+00  9.862E+03  2.430E-01  0.000E+00   0.0E+00
   51   88  2.570E+02  0.000E+00  0.000E+00  0.000E+00  1.240E+04  1.352E-01  0.000E+00   0.0E+00
   51   89  2.553E+02  0.000E+00  0.000E+00  0.000E+00  0.000E+00  0.000E+00  5.177E-03   0.0E+00
   51   90  2.546E+02  8.868E+04  5.169E-07  2.166E-06  0.000E+00  0.000E+00  4.568E-04   6.3E+00
   51   91  2.538E+02  0.000E+00  0.000E+00  0.000E+00  0.000E+00  0.000E+00  3.092E-01   0.0E+00
   51   92  2.535E+02  1.175E+07  1.132E-04  4.722E-04  0.000E+00  0.000E+00  3.097E-02   2.2E-01
   51   93  2.531E+02  1.135E+08  1.527E-03  6.361E-03  0.000E+00  0.000E+00  1.297E-03   8.6E-01
   51   94  2.521E+02  4.522E+07  4.310E-04  1.789E-03  0.000E+00  0.000E+00  4.356E-02   2.6E-01
   51   95  2.517E+02  1.252E+08  1.664E-03  6.895E-03  0.000E+00  0.000E+00  6.965E-04   8.6E-01
   51   96  2.503E+02  0.000E+00  0.000E+00  0.000E+00  6.079E+04  0.000E+00  0.000E+00   0.0E+00
   51   97  2.471E+02  1.241E+07  6.816E-05  2.772E-04  0.000E+00  0.000E+00  1.616E-02   3.4E+00
   51   98  2.420E+02  0.000E+00  0.000E+00  0.000E+00  7.948E+00  8.560E-01  0.000E+00   0.0E+00
   51  100  2.419E+02  0.000E+00  0.000E+00  0.000E+00  3.250E+04  0.000E+00  0.000E+00   0.0E+00
   51  101  2.418E+02  0.000E+00  0.000E+00  0.000E+00  1.184E+04  1.541E-01  0.000E+00   0.0E+00
   51  102  2.413E+02  0.000E+00  0.000E+00  0.000E+00  4.242E+02  7.593E-02  0.000E+00   0.0E+00
   51  103  2.412E+02  0.000E+00  0.000E+00  0.000E+00  2.201E+04  6.986E-01  0.000E+00   0.0E+00
   51  104  2.411E+02  1.392E+05  1.213E-06  4.814E-06  0.000E+00  0.000E+00  4.980E-01   1.1E+00
   51  105  2.411E+02  0.000E+00  0.000E+00  0.000E+00  1.142E+03  4.569E-01  0.000E+00   0.0E+00
   51  106  2.411E+02  4.283E+09  5.225E-02  2.074E-01  0.000E+00  0.000E+00  1.801E+01   1.0E+00
   51  107  2.411E+02  0.000E+00  0.000E+00  0.000E+00  1.058E+04  0.000E+00  0.000E+00   0.0E+00
   51  110  2.406E+02  2.628E+09  3.194E-02  1.265E-01  0.000E+00  0.000E+00  2.886E+00   1.0E+00
   51  111  2.406E+02  0.000E+00  0.000E+00  0.000E+00  0.000E+00  0.000E+00  7.262E+00   0.0E+00
   51  112  2.404E+02  0.000E+00  0.000E+00  0.000E+00  0.000E+00  0.000E+00  1.488E+00   0.0E+00
   51  114  2.312E+02  9.350E+07  7.495E-04  2.853E-03  0.000E+00  0.000E+00  1.323E-04   5.7E-01
   51  115  2.311E+02  7.948E+07  6.362E-04  2.420E-03  0.000E+00  0.000E+00  4.530E-01   5.7E-01
   51  116  2.306E+02  5.419E+08  6.049E-03  2.296E-02  0.000E+00  0.000E+00  1.249E+00   9.2E-01
   51  117  2.274E+02  3.550E+07  1.652E-04  6.182E-04  0.000E+00  0.000E+00  3.772E-02   7.4E-01
   51  118  2.214E+02  0.000E+00  0.000E+00  0.000E+00  1.172E+04  1.499E-01  0.000E+00   0.0E+00
   51  119  2.213E+02  0.000E+00  0.000E+00  0.000E+00  1.007E+05  0.000E+00  0.000E+00   0.0E+00
   51  120  2.212E+02  0.000E+00  0.000E+00  0.000E+00  1.373E+04  1.741E+00  0.000E+00   0.0E+00
   51  121  2.211E+02  0.000E+00  0.000E+00  0.000E+00  1.684E+04  4.061E-01  0.000E+00   0.0E+00
   51  122  2.207E+02  1.442E+09  1.473E-02  5.351E-02  0.000E+00  0.000E+00  1.729E+00   1.0E+00
   51  123  2.206E+02  0.000E+00  0.000E+00  0.000E+00  0.000E+00  0.000E+00  8.214E-01   0.0E+00
   51  124  2.206E+02  0.000E+00  0.000E+00  0.000E+00  0.000E+00  0.000E+00  3.348E-01   0.0E+00
   52   53  4.980E+04  0.000E+00  0.000E+00  0.000E+00  0.000E+00  1.292E-01  0.000E+00   0.0E+00
   52   55  1.857E+04  0.000E+00  0.000E+00  0.000E+00  1.942E-04  0.000E+00  0.000E+00   0.0E+00
   52   57  9.878E+03  0.000E+00  0.000E+00  0.000E+00  1.673E-03  0.000E+00  0.000E+00   0.0E+00
   52   59  4.208E+03  0.000E+00  0.000E+00  0.000E+00  0.000E+00  1.331E+01  0.000E+00   0.0E+00
   52   62  2.265E+03  0.000E+00  0.000E+00  0.000E+00  8.439E-02  0.000E+00  0.000E+00   0.0E+00
   52   65  2.218E+03  0.000E+00  0.000E+00  0.000E+00  3.212E-01  0.000E+00  0.000E+00   0.0E+00
   52   67  2.088E+03  0.000E+00  0.000E+00  0.000E+00  0.000E+00  0.000E+00  5.460E-04   0.0E+00
   52   69  2.030E+03  8.192E+07  1.518E-01  1.015E+00  0.000E+00  0.000E+00  0.000E+00   8.2E-01
   52   70  2.029E+03  0.000E+00  0.000E+00  0.000E+00  0.000E+00  0.000E+00  2.458E-04   0.0E+00
   52   71  1.635E+03  0.000E+00  0.000E+00  0.000E+00  0.000E+00  2.184E+02  0.000E+00   0.0E+00
   52   74  1.181E+03  0.000E+00  0.000E+00  0.000E+00  0.000E+00  0.000E+00  3.200E-07   0.0E+00
   52   76  3.338E+02  0.000E+00  0.000E+00  0.000E+00  4.532E+04  0.000E+00  0.000E+00   0.0E+00
   52   77  3.319E+02  0.000E+00  0.000E+00  0.000E+00  0.000E+00  2.612E-01  0.000E+00   0.0E+00
   52   78  2.998E+02  2.229E+09  9.011E-02  8.894E-02  0.000E+00  0.000E+00  0.000E+00   1.0E+00
   52   79  2.972E+02  0.000E+00  0.000E+00  0.000E+00  0.000E+00  0.000E+00  6.899E-02   0.0E+00
   52   81  2.956E+02  1.644E+08  6.458E-03  6.284E-03  0.000E+00  0.000E+00  0.000E+00   1.1E+00
   52   83  2.947E+02  0.000E+00  0.000E+00  0.000E+00  0.000E+00  0.000E+00  6.878E-05   0.0E+00
   52   84  2.957E+02  0.000E+00  0.000E+00  0.000E+00  0.000E+00  2.090E-02  0.000E+00   0.0E+00
   52   86  2.677E+02  4.971E+06  1.602E-04  1.412E-04  0.000E+00  0.000E+00  0.000E+00   6.6E-01
   52   87  2.666E+02  2.823E+07  9.024E-04  7.920E-04  0.000E+00  0.000E+00  0.000E+00   1.1E+00
   52   88  2.661E+02  0.000E+00  0.000E+00  0.000E+00  0.000E+00  0.000E+00  3.515E-03   0.0E+00
   52   90  2.635E+02  0.000E+00  0.000E+00  0.000E+00  0.000E+00  2.656E-02  0.000E+00   0.0E+00
   52   92  2.624E+02  0.000E+00  0.000E+00  0.000E+00  1.276E+05  0.000E+00  0.000E+00   0.0E+00
   52   94  2.610E+02  0.000E+00  0.000E+00  0.000E+00  4.656E+04  0.000E+00  0.000E+00   0.0E+00
   52   97  2.556E+02  0.000E+00  0.000E+00  0.000E+00  0.000E+00  1.892E-01  0.000E+00   0.0E+00
   52   98  2.501E+02  2.379E+10  6.692E-01  5.509E-01  0.000E+00  0.000E+00  0.000E+00   1.0E+00
   52  101  2.499E+02  0.000E+00  0.000E+00  0.000E+00  0.000E+00  0.000E+00  2.202E+00   0.0E+00
   52  103  2.492E+02  0.000E+00  0.000E+00  0.000E+00  0.000E+00  0.000E+00  1.424E+01   0.0E+00
   52  104  2.492E+02  0.000E+00  0.000E+00  0.000E+00  1.643E+06  0.000E+00  0.000E+00   0.0E+00
   52  114  2.386E+02  0.000E+00  0.000E+00  0.000E+00  2.616E+02  0.000E+00  0.000E+00   0.0E+00
   52  115  2.384E+02  0.000E+00  0.000E+00  0.000E+00  2.087E+03  0.000E+00  0.000E+00   0.0E+00
   52  117  2.346E+02  0.000E+00  0.000E+00  0.000E+00  0.000E+00  1.582E+00  0.000E+00   0.0E+00
   52  121  2.279E+02  0.000E+00  0.000E+00  0.000E+00  0.000E+00  0.000E+00  5.474E-03   0.0E+00
   53   55  2.960E+04  0.000E+00  0.000E+00  0.000E+00  1.900E-05  4.828E-01  0.000E+00   0.0E+00
   53   56  2.052E+04  0.000E+00  0.000E+00  0.000E+00  4.992E-05  0.000E+00  0.000E+00   0.0E+00
   53   57  1.232E+04  0.000E+00  0.000E+00  0.000E+00  1.847E-04  2.850E-01  0.000E+00   0.0E+00
   53   58  1.028E+04  0.000E+00  0.000E+00  0.000E+00  2.741E-03  0.000E+00  0.000E+00   0.0E+00
   53   59  4.596E+03  0.000E+00  0.000E+00  0.000E+00  8.328E-02  3.207E+01  0.000E+00   0.0E+00
   53   62  2.373E+03  0.000E+00  0.000E+00  0.000E+00  3.454E-02  3.077E+01  0.000E+00   0.0E+00
   53   63  2.279E+03  0.000E+00  0.000E+00  0.000E+00  0.000E+00  0.000E+00  1.726E-04   0.0E+00
   53   65  2.321E+03  0.000E+00  0.000E+00  0.000E+00  3.261E-02  7.996E+01  0.000E+00   0.0E+00
   53   66  2.251E+03  0.000E+00  0.000E+00  0.000E+00  2.852E-01  0.000E+00  0.000E+00   0.0E+00
   53   67  2.179E+03  2.864E+07  3.397E-02  7.310E-01  0.000E+00  0.000E+00  1.763E-04   8.6E-01
   53   68  2.168E+03  0.000E+00  0.000E+00  0.000E+00  0.000E+00  0.000E+00  8.167E-06   0.0E+00
   53   69  2.116E+03  6.972E+07  4.681E-02  9.785E-01  0.000E+00  0.000E+00  4.094E-04   8.2E-01
   53   70  2.115E+03  5.626E+07  6.288E-02  1.313E+00  0.000E+00  0.000E+00  2.104E-03   8.3E-01
   53   71  1.690E+03  0.000E+00  0.000E+00  0.000E+00  1.047E+00  4.006E+02  0.000E+00   0.0E+00
   53   72  1.252E+03  0.000E+00  0.000E+00  0.000E+00  0.000E+00  0.000E+00  1.009E-04   0.0E+00
   53   74  1.210E+03  1.118E+07  4.086E-03  4.881E-02  0.000E+00  0.000E+00  1.732E-04   8.2E-01
   53   75  1.206E+03  0.000E+00  0.000E+00  0.000E+00  0.000E+00  0.000E+00  2.226E-04   0.0E+00
   53   76  3.361E+02  0.000E+00  0.000E+00  0.000E+00  1.276E+05  8.899E-02  0.000E+00   0.0E+00
   53   77  3.341E+02  0.000E+00  0.000E+00  0.000E+00  7.144E+03  2.926E-01  0.000E+00   0.0E+00
   53   78  3.016E+02  5.270E+09  7.187E-02  2.141E-01  0.000E+00  0.000E+00  1.385E+00   1.0E+00
   53   79  2.990E+02  3.682E+08  8.224E-03  2.429E-02  0.000E+00  0.000E+00  1.878E-01   1.1E+00
   53   80  2.988E+02  0.000E+00  0.000E+00  0.000E+00  0.000E+00  0.000E+00  3.087E-02   0.0E+00
   53   81  2.973E+02  1.226E+08  1.625E-03  4.773E-03  0.000E+00  0.000E+00  4.299E-01   1.1E+00
   53   82  2.982E+02  0.000E+00  0.000E+00  0.000E+00  0.000E+00  3.647E-02  0.000E+00   0.0E+00
   53   83  2.964E+02  6.324E+08  1.388E-02  4.065E-02  0.000E+00  0.000E+00  5.466E-01   1.1E+00
[truncated: 202,763 more chars]
