# Supplementary material
Source: MDPI journal article supplement (https://www.mdpi.com/2218-2004/6/2/25)
Supplement: s1 [file s1 › atom-kma/tab6.dat]

Table 6. Transition wavelengths (Lambda_ij in Angstrom), radiative rates (A_ji in sec-1), oscillator 
         strengths (f_ij, dimensionless), and line strengths (S, in atomic units) for electric 
         dipole (E1), and A_ji for E2, M1 and M2 transitions in Y XXX. I and J are the lower and
         upper levels of a transition -- see Table 3 for their definitions.
    
    I    J  Lambda     A (E1)     f (E1)     S (E1)     A (E2)     A (M1)     A (M2)      R (E1)
    1    2  6.212E+00  0.000E+00  0.000E+00  0.000E+00  0.000E+00  0.000E+00  1.133E+07   0.0E+00
    1    3  6.201E+00  7.791E+12  1.347E-01  2.750E-03  0.000E+00  0.000E+00  0.000E+00   9.8E-01
    1    4  6.036E+00  0.000E+00  0.000E+00  0.000E+00  0.000E+00  2.716E+07  0.000E+00   0.0E+00
    1    5  6.028E+00  0.000E+00  0.000E+00  0.000E+00  1.212E+10  0.000E+00  0.000E+00   0.0E+00
    1    7  5.976E+00  0.000E+00  0.000E+00  0.000E+00  0.000E+00  2.612E+06  0.000E+00   0.0E+00
    1    9  5.971E+00  5.295E+12  8.492E-02  1.669E-03  0.000E+00  0.000E+00  0.000E+00   9.8E-01
    1   10  5.962E+00  0.000E+00  0.000E+00  0.000E+00  1.207E+10  0.000E+00  0.000E+00   0.0E+00
    1   12  5.810E+00  0.000E+00  0.000E+00  0.000E+00  0.000E+00  9.393E+05  0.000E+00   0.0E+00
    1   14  5.772E+00  2.314E+11  3.467E-03  6.588E-05  0.000E+00  0.000E+00  0.000E+00   9.9E-01
    1   16  5.758E+00  0.000E+00  0.000E+00  0.000E+00  0.000E+00  0.000E+00  1.542E+08   0.0E+00
    1   18  5.756E+00  0.000E+00  0.000E+00  0.000E+00  0.000E+00  1.680E+07  0.000E+00   0.0E+00
    1   19  5.752E+00  0.000E+00  0.000E+00  0.000E+00  1.360E+10  0.000E+00  0.000E+00   0.0E+00
    1   20  5.748E+00  0.000E+00  0.000E+00  0.000E+00  0.000E+00  0.000E+00  2.417E+08   0.0E+00
    1   23  5.704E+00  1.170E+14  1.711E+00  3.213E-02  0.000E+00  0.000E+00  0.000E+00   9.9E-01
    1   24  5.560E+00  0.000E+00  0.000E+00  0.000E+00  0.000E+00  0.000E+00  1.046E+07   0.0E+00
    1   25  5.549E+00  0.000E+00  0.000E+00  0.000E+00  0.000E+00  0.000E+00  5.876E+07   0.0E+00
    1   27  5.527E+00  1.278E+14  1.756E+00  3.195E-02  0.000E+00  0.000E+00  0.000E+00   9.9E-01
    1   28  5.437E+00  0.000E+00  0.000E+00  0.000E+00  0.000E+00  2.951E+06  0.000E+00   0.0E+00
    1   31  5.297E+00  8.047E+12  1.015E-01  1.771E-03  0.000E+00  0.000E+00  0.000E+00   1.0E+00
    1   32  5.255E+00  0.000E+00  0.000E+00  0.000E+00  0.000E+00  0.000E+00  5.146E+07   0.0E+00
    1   33  5.249E+00  2.487E+13  3.082E-01  5.326E-03  0.000E+00  0.000E+00  0.000E+00   1.0E+00
    1   34  5.096E+00  0.000E+00  0.000E+00  0.000E+00  0.000E+00  3.141E+05  0.000E+00   0.0E+00
    1   35  5.094E+00  0.000E+00  0.000E+00  0.000E+00  6.792E+09  0.000E+00  0.000E+00   0.0E+00
    1   37  5.070E+00  0.000E+00  0.000E+00  0.000E+00  1.910E+11  0.000E+00  0.000E+00   0.0E+00
    1   38  4.572E+00  0.000E+00  0.000E+00  0.000E+00  0.000E+00  0.000E+00  6.736E+06   0.0E+00
    1   39  4.570E+00  2.603E+12  2.445E-02  3.679E-04  0.000E+00  0.000E+00  0.000E+00   9.4E-01
    1   40  4.532E+00  0.000E+00  0.000E+00  0.000E+00  0.000E+00  1.509E+07  0.000E+00   0.0E+00
    1   41  4.530E+00  0.000E+00  0.000E+00  0.000E+00  4.685E+09  0.000E+00  0.000E+00   0.0E+00
    1   43  4.518E+00  0.000E+00  0.000E+00  0.000E+00  0.000E+00  3.076E+06  0.000E+00   0.0E+00
    1   44  4.515E+00  0.000E+00  0.000E+00  0.000E+00  4.666E+09  0.000E+00  0.000E+00   0.0E+00
    1   47  4.473E+00  1.232E+11  1.108E-03  1.632E-05  0.000E+00  0.000E+00  0.000E+00   9.7E-01
    1   49  4.470E+00  0.000E+00  0.000E+00  0.000E+00  0.000E+00  0.000E+00  4.720E+07   0.0E+00
    1   51  4.468E+00  0.000E+00  0.000E+00  0.000E+00  0.000E+00  0.000E+00  1.694E+08   0.0E+00
    1   53  4.457E+00  5.627E+13  5.028E-01  7.379E-03  0.000E+00  0.000E+00  0.000E+00   9.8E-01
    1   54  4.445E+00  0.000E+00  0.000E+00  0.000E+00  0.000E+00  6.868E+04  0.000E+00   0.0E+00
    1   56  4.444E+00  0.000E+00  0.000E+00  0.000E+00  6.124E+09  0.000E+00  0.000E+00   0.0E+00
    1   59  4.442E+00  0.000E+00  0.000E+00  0.000E+00  8.106E+10  0.000E+00  0.000E+00   0.0E+00
    1   63  4.442E+00  4.538E+08  4.026E-06  5.887E-08  0.000E+00  0.000E+00  0.000E+00   7.4E-02
    1   64  4.404E+00  0.000E+00  0.000E+00  0.000E+00  0.000E+00  6.172E+05  0.000E+00   0.0E+00
    1   66  4.392E+00  0.000E+00  0.000E+00  0.000E+00  0.000E+00  7.599E+06  0.000E+00   0.0E+00
    1   67  4.391E+00  0.000E+00  0.000E+00  0.000E+00  5.185E+09  0.000E+00  0.000E+00   0.0E+00
    1   68  4.348E+00  0.000E+00  0.000E+00  0.000E+00  0.000E+00  0.000E+00  4.712E+06   0.0E+00
    1   69  4.345E+00  0.000E+00  0.000E+00  0.000E+00  0.000E+00  0.000E+00  3.947E+07   0.0E+00
    1   71  4.341E+00  3.645E+13  3.089E-01  4.415E-03  0.000E+00  0.000E+00  0.000E+00   9.8E-01
    1   73  4.321E+00  0.000E+00  0.000E+00  0.000E+00  4.337E+10  0.000E+00  0.000E+00   0.0E+00
    1   76  4.142E+00  0.000E+00  0.000E+00  0.000E+00  0.000E+00  2.683E+06  0.000E+00   0.0E+00
    1   79  4.108E+00  6.095E+12  4.626E-02  6.257E-04  0.000E+00  0.000E+00  0.000E+00   9.7E-01
    1   80  4.100E+00  0.000E+00  0.000E+00  0.000E+00  0.000E+00  0.000E+00  4.307E+07   0.0E+00
    1   81  4.096E+00  1.361E+13  1.027E-01  1.385E-03  0.000E+00  0.000E+00  0.000E+00   9.6E-01
    1   82  4.094E+00  1.530E+12  1.153E-02  1.554E-04  0.000E+00  0.000E+00  0.000E+00   1.1E+00
    1   83  4.093E+00  0.000E+00  0.000E+00  0.000E+00  0.000E+00  0.000E+00  1.039E+07   0.0E+00
    1   84  4.078E+00  0.000E+00  0.000E+00  0.000E+00  0.000E+00  7.559E+06  0.000E+00   0.0E+00
    1   85  4.078E+00  0.000E+00  0.000E+00  0.000E+00  4.121E+09  0.000E+00  0.000E+00   0.0E+00
    1   87  4.073E+00  0.000E+00  0.000E+00  0.000E+00  0.000E+00  2.142E+06  0.000E+00   0.0E+00
    1   88  4.072E+00  0.000E+00  0.000E+00  0.000E+00  4.314E+09  0.000E+00  0.000E+00   0.0E+00
    1   90  4.060E+00  0.000E+00  0.000E+00  0.000E+00  0.000E+00  2.209E+05  0.000E+00   0.0E+00
    1   91  4.060E+00  0.000E+00  0.000E+00  0.000E+00  4.615E+08  0.000E+00  0.000E+00   0.0E+00
    1   94  4.055E+00  3.708E+10  2.742E-04  3.660E-06  0.000E+00  0.000E+00  0.000E+00   9.6E-01
    1   96  4.054E+00  0.000E+00  0.000E+00  0.000E+00  0.000E+00  0.000E+00  1.795E+07   0.0E+00
    1   98  4.053E+00  0.000E+00  0.000E+00  0.000E+00  0.000E+00  0.000E+00  1.017E+08   0.0E+00
    1   99  4.054E+00  0.000E+00  0.000E+00  0.000E+00  5.670E+10  0.000E+00  0.000E+00   0.0E+00
    1  101  4.049E+00  2.818E+13  2.077E-01  2.769E-03  0.000E+00  0.000E+00  0.000E+00   9.7E-01
    1  102  4.044E+00  0.000E+00  0.000E+00  0.000E+00  0.000E+00  0.000E+00  1.852E+03   0.0E+00
    1  105  4.043E+00  0.000E+00  0.000E+00  0.000E+00  0.000E+00  2.972E+04  0.000E+00   0.0E+00
    1  107  4.043E+00  0.000E+00  0.000E+00  0.000E+00  2.482E+07  0.000E+00  0.000E+00   0.0E+00
    1  110  4.042E+00  0.000E+00  0.000E+00  0.000E+00  5.045E+10  0.000E+00  0.000E+00   0.0E+00
    1  120  4.035E+00  0.000E+00  0.000E+00  0.000E+00  0.000E+00  0.000E+00  5.833E+02   0.0E+00
    1  123  3.990E+00  3.816E+11  2.733E-03  3.590E-05  0.000E+00  0.000E+00  0.000E+00   8.3E-01
    1  124  3.975E+00  0.000E+00  0.000E+00  0.000E+00  0.000E+00  3.987E+05  0.000E+00   0.0E+00
    1  126  3.970E+00  0.000E+00  0.000E+00  0.000E+00  0.000E+00  4.065E+06  0.000E+00   0.0E+00
    1  127  3.970E+00  0.000E+00  0.000E+00  0.000E+00  2.774E+09  0.000E+00  0.000E+00   0.0E+00
    1  128  3.952E+00  0.000E+00  0.000E+00  0.000E+00  0.000E+00  0.000E+00  2.570E+06   0.0E+00
    1  129  3.951E+00  0.000E+00  0.000E+00  0.000E+00  0.000E+00  0.000E+00  2.334E+07   0.0E+00
    1  131  3.950E+00  1.609E+13  1.129E-01  1.468E-03  0.000E+00  0.000E+00  0.000E+00   9.7E-01
    1  133  3.941E+00  0.000E+00  0.000E+00  0.000E+00  3.073E+10  0.000E+00  0.000E+00   0.0E+00
    2    3  3.478E+03  0.000E+00  0.000E+00  0.000E+00  1.156E-04  1.974E+02  0.000E+00   0.0E+00
    2    4  2.136E+02  9.040E+09  3.709E-02  1.304E-01  0.000E+00  0.000E+00  1.517E+00   1.1E+00
    2    5  2.033E+02  5.557E+09  3.444E-02  1.153E-01  0.000E+00  0.000E+00  6.522E-03   1.0E+00
    2    6  1.579E+02  2.449E+10  1.282E-01  3.334E-01  0.000E+00  0.000E+00  4.618E+01   1.0E+00
    2    7  1.573E+02  6.557E+08  1.459E-03  3.776E-03  0.000E+00  0.000E+00  1.036E+02   1.4E+00
    2    8  1.576E+02  0.000E+00  0.000E+00  0.000E+00  1.912E+03  0.000E+00  0.000E+00   0.0E+00
    2    9  1.542E+02  0.000E+00  0.000E+00  0.000E+00  1.015E+03  3.850E+06  0.000E+00   0.0E+00
    2   10  1.479E+02  1.575E+10  5.167E-02  1.258E-01  0.000E+00  0.000E+00  1.052E+02   9.8E-01
    2   11  1.201E+02  0.000E+00  0.000E+00  0.000E+00  0.000E+00  0.000E+00  4.051E+02   0.0E+00
    2   12  8.975E+01  1.078E+08  7.815E-05  1.155E-04  0.000E+00  0.000E+00  2.721E+00   7.0E-01
    2   13  8.298E+01  0.000E+00  0.000E+00  0.000E+00  1.151E+06  0.000E+00  0.000E+00   0.0E+00
    2   14  8.143E+01  0.000E+00  0.000E+00  0.000E+00  1.246E+06  3.699E+03  0.000E+00   0.0E+00
    2   15  7.941E+01  0.000E+00  0.000E+00  0.000E+00  6.046E+05  1.808E+01  0.000E+00   0.0E+00
    2   16  7.874E+01  0.000E+00  0.000E+00  0.000E+00  1.464E+06  1.968E+01  0.000E+00   0.0E+00
    2   17  7.863E+01  0.000E+00  0.000E+00  0.000E+00  1.495E+06  0.000E+00  0.000E+00   0.0E+00
    2   18  7.845E+01  2.310E+09  1.279E-03  1.652E-03  0.000E+00  0.000E+00  1.556E+00   6.4E-01
    2   19  7.771E+01  1.429E+08  1.294E-04  1.655E-04  0.000E+00  0.000E+00  2.867E-03   6.4E-01
    2   20  7.703E+01  0.000E+00  0.000E+00  0.000E+00  8.111E+03  4.751E+01  0.000E+00   0.0E+00
    2   21  7.641E+01  0.000E+00  0.000E+00  0.000E+00  0.000E+00  0.000E+00  5.476E+02   0.0E+00
    2   22  7.527E+01  0.000E+00  0.000E+00  0.000E+00  1.055E+06  5.175E+01  0.000E+00   0.0E+00
    2   23  6.971E+01  0.000E+00  0.000E+00  0.000E+00  2.074E+04  1.431E+04  0.000E+00   0.0E+00
    2   24  5.294E+01  0.000E+00  0.000E+00  0.000E+00  9.989E+02  6.415E+00  0.000E+00   0.0E+00
    2   25  5.199E+01  0.000E+00  0.000E+00  0.000E+00  4.946E+04  3.328E+02  0.000E+00   0.0E+00
    2   26  5.161E+01  0.000E+00  0.000E+00  0.000E+00  1.535E+04  7.581E+01  0.000E+00   0.0E+00
    2   27  5.010E+01  0.000E+00  0.000E+00  0.000E+00  2.790E+04  2.716E+03  0.000E+00   0.0E+00
    2   28  4.361E+01  3.107E+11  5.315E-02  3.816E-02  0.000E+00  0.000E+00  9.042E+03   6.2E-01
    2   29  4.187E+01  0.000E+00  0.000E+00  0.000E+00  0.000E+00  0.000E+00  1.895E+04   0.0E+00
    2   30  3.608E+01  0.000E+00  0.000E+00  0.000E+00  9.579E+02  0.000E+00  0.000E+00   0.0E+00
    2   31  3.596E+01  0.000E+00  0.000E+00  0.000E+00  5.429E+02  1.250E+04  0.000E+00   0.0E+00
    2   32  3.413E+01  0.000E+00  0.000E+00  0.000E+00  3.980E+03  8.756E+00  0.000E+00   0.0E+00
    2   33  3.386E+01  0.000E+00  0.000E+00  0.000E+00  3.318E+03  1.054E+04  0.000E+00   0.0E+00
    2   34  2.837E+01  1.107E+04  8.013E-10  3.742E-10  0.000E+00  0.000E+00  2.337E+01   5.3E-03
    2   35  2.830E+01  2.469E+04  2.965E-09  1.381E-09  0.000E+00  0.000E+00  7.952E+01   1.4E+00
    2   36  2.812E+01  9.319E+06  1.547E-06  7.159E-07  0.000E+00  0.000E+00  1.653E+02   3.2E-01
    2   37  2.757E+01  1.867E+06  2.128E-07  9.660E-08  0.000E+00  0.000E+00  5.223E+00   7.8E-01
    2   38  1.732E+01  0.000E+00  0.000E+00  0.000E+00  2.451E+05  1.419E+04  0.000E+00   0.0E+00
    2   39  1.729E+01  0.000E+00  0.000E+00  0.000E+00  1.897E+05  2.790E+04  0.000E+00   0.0E+00
    2   40  1.675E+01  2.446E+12  6.177E-02  1.703E-02  0.000E+00  0.000E+00  3.764E+04   1.0E+00
    2   41  1.674E+01  1.267E+12  5.322E-02  1.466E-02  0.000E+00  0.000E+00  1.123E+02   1.0E+00
    2   42  1.658E+01  2.379E+12  1.372E-01  3.743E-02  0.000E+00  0.000E+00  3.751E+05   1.0E+00
    2   43  1.657E+01  1.124E+11  2.776E-03  7.572E-04  0.000E+00  0.000E+00  8.131E+05   9.7E-01
    2   44  1.653E+01  1.159E+12  4.750E-02  1.293E-02  0.000E+00  0.000E+00  6.414E+05   1.0E+00
    2   45  1.636E+01  0.000E+00  0.000E+00  0.000E+00  0.000E+00  0.000E+00  8.692E+05   0.0E+00
    2   46  1.600E+01  0.000E+00  0.000E+00  0.000E+00  4.725E+09  0.000E+00  0.000E+00   0.0E+00
    2   47  1.598E+01  0.000E+00  0.000E+00  0.000E+00  4.685E+09  2.942E+02  0.000E+00   0.0E+00
    2   48  1.595E+01  0.000E+00  0.000E+00  0.000E+00  2.012E+09  4.896E+02  0.000E+00   0.0E+00
    2   49  1.594E+01  0.000E+00  0.000E+00  0.000E+00  4.614E+09  1.721E+02  0.000E+00   0.0E+00
    2   50  1.594E+01  0.000E+00  0.000E+00  0.000E+00  4.681E+09  0.000E+00  0.000E+00   0.0E+00
    2   51  1.591E+01  0.000E+00  0.000E+00  0.000E+00  4.622E+07  9.916E+01  0.000E+00   0.0E+00
    2   52  1.588E+01  0.000E+00  0.000E+00  0.000E+00  2.628E+09  2.323E-02  0.000E+00   0.0E+00
    2   53  1.578E+01  0.000E+00  0.000E+00  0.000E+00  1.423E+07  4.004E+02  0.000E+00   0.0E+00
    2   54  1.562E+01  6.047E+07  1.328E-06  3.414E-07  0.000E+00  0.000E+00  1.913E+01   9.9E-01
    2   55  1.562E+01  0.000E+00  0.000E+00  0.000E+00  0.000E+00  0.000E+00  5.186E-01   0.0E+00
    2   56  1.561E+01  4.526E+08  1.653E-05  4.249E-06  0.000E+00  0.000E+00  3.045E+02   1.0E+00
    2   58  1.560E+01  3.308E+08  1.688E-05  4.334E-06  0.000E+00  0.000E+00  6.092E+01   9.9E-01
    2   59  1.559E+01  6.594E+06  2.403E-07  6.165E-08  0.000E+00  0.000E+00  2.033E+02   9.9E-01
    2   60  1.559E+01  7.400E+08  3.773E-05  9.679E-06  0.000E+00  0.000E+00  3.853E+02   9.9E-01
    2   61  1.560E+01  0.000E+00  0.000E+00  0.000E+00  1.073E+06  0.000E+00  0.000E+00   0.0E+00
    2   62  1.558E+01  0.000E+00  0.000E+00  0.000E+00  0.000E+00  0.000E+00  1.705E+02   0.0E+00
    2   63  1.559E+01  0.000E+00  0.000E+00  0.000E+00  1.807E+05  2.462E+01  0.000E+00   0.0E+00
    2   64  1.514E+01  7.573E+07  1.561E-06  3.888E-07  0.000E+00  0.000E+00  4.588E+00   1.3E+00
    2   65  1.502E+01  0.000E+00  0.000E+00  0.000E+00  0.000E+00  0.000E+00  2.944E+03   0.0E+00
    2   66  1.499E+01  4.026E+08  8.135E-06  2.007E-06  0.000E+00  0.000E+00  4.674E+01   2.5E+00
    2   67  1.498E+01  5.708E+06  1.920E-07  4.735E-08  0.000E+00  0.000E+00  5.258E+00   3.1E+00
    2   68  1.449E+01  0.000E+00  0.000E+00  0.000E+00  2.874E+04  2.312E+01  0.000E+00   0.0E+00
    2   69  1.446E+01  0.000E+00  0.000E+00  0.000E+00  1.394E+06  3.198E+01  0.000E+00   0.0E+00
    2   70  1.444E+01  0.000E+00  0.000E+00  0.000E+00  4.080E+05  4.648E-03  0.000E+00   0.0E+00
    2   71  1.441E+01  0.000E+00  0.000E+00  0.000E+00  8.314E+05  3.071E+02  0.000E+00   0.0E+00
    2   72  1.420E+01  1.114E+07  4.712E-07  1.101E-07  0.000E+00  0.000E+00  3.767E-01   1.0E+00
    2   73  1.419E+01  5.442E+07  1.643E-06  3.838E-07  0.000E+00  0.000E+00  1.188E+01   9.8E-01
    2   74  1.418E+01  0.000E+00  0.000E+00  0.000E+00  0.000E+00  0.000E+00  4.479E+01   0.0E+00
    2   75  1.418E+01  5.017E+08  2.118E-05  4.946E-06  0.000E+00  0.000E+00  6.358E+02   9.9E-01
    2   76  1.243E+01  6.945E+09  9.658E-05  1.977E-05  0.000E+00  0.000E+00  1.999E+03   9.5E-01
    2   77  1.238E+01  0.000E+00  0.000E+00  0.000E+00  0.000E+00  0.000E+00  3.243E+01   0.0E+00
    2   78  1.213E+01  0.000E+00  0.000E+00  0.000E+00  2.705E+06  0.000E+00  0.000E+00   0.0E+00
    2   79  1.213E+01  0.000E+00  0.000E+00  0.000E+00  1.567E+06  5.751E+03  0.000E+00   0.0E+00
    2   80  1.206E+01  0.000E+00  0.000E+00  0.000E+00  9.111E+05  8.248E+03  0.000E+00   0.0E+00
    2   81  1.203E+01  0.000E+00  0.000E+00  0.000E+00  4.042E+05  4.794E+03  0.000E+00   0.0E+00
    2   82  1.201E+01  0.000E+00  0.000E+00  0.000E+00  1.628E+05  2.283E+04  0.000E+00   0.0E+00
    2   83  1.200E+01  0.000E+00  0.000E+00  0.000E+00  1.629E+05  8.626E+03  0.000E+00   0.0E+00
    2   84  1.187E+01  1.332E+12  1.690E-02  3.303E-03  0.000E+00  0.000E+00  2.551E+04   1.0E+00
    2   85  1.187E+01  6.899E+11  1.458E-02  2.849E-03  0.000E+00  0.000E+00  3.290E+02   1.0E+00
    2   86  1.183E+01  1.350E+12  3.968E-02  7.729E-03  0.000E+00  0.000E+00  4.223E+05   9.9E-01
    2   87  1.183E+01  9.265E+10  1.166E-03  2.270E-04  0.000E+00  0.000E+00  9.116E+05   9.4E-01
    2   88  1.182E+01  6.773E+11  1.419E-02  2.760E-03  0.000E+00  0.000E+00  7.147E+05   1.0E+00
    2   89  1.178E+01  0.000E+00  0.000E+00  0.000E+00  0.000E+00  0.000E+00  1.029E+06   0.0E+00
    2   90  1.172E+01  1.212E+08  1.498E-06  2.891E-07  0.000E+00  0.000E+00  2.252E+03   8.7E-01
    2   91  1.172E+01  1.446E+09  2.976E-05  5.740E-06  0.000E+00  0.000E+00  1.235E+03   8.6E-01
    2   92  1.170E+01  8.329E+09  2.393E-04  4.609E-05  0.000E+00  0.000E+00  2.986E+02   8.4E-01
    2   93  1.168E+01  0.000E+00  0.000E+00  0.000E+00  2.078E+09  0.000E+00  0.000E+00   0.0E+00
    2   94  1.168E+01  0.000E+00  0.000E+00  0.000E+00  2.074E+09  3.745E+02  0.000E+00   0.0E+00
    2   95  1.167E+01  0.000E+00  0.000E+00  0.000E+00  8.820E+08  6.806E+02  0.000E+00   0.0E+00
    2   96  1.167E+01  0.000E+00  0.000E+00  0.000E+00  2.014E+09  2.617E+02  0.000E+00   0.0E+00
    2   97  1.167E+01  0.000E+00  0.000E+00  0.000E+00  2.097E+09  0.000E+00  0.000E+00   0.0E+00
    2   98  1.166E+01  0.000E+00  0.000E+00  0.000E+00  6.470E+07  1.096E+02  0.000E+00   0.0E+00
    2   99  1.167E+01  2.049E+08  4.182E-06  8.033E-07  0.000E+00  0.000E+00  4.466E+02   1.0E+00
    2  100  1.165E+01  0.000E+00  0.000E+00  0.000E+00  1.202E+09  2.427E-01  0.000E+00   0.0E+00
    2  101  1.162E+01  0.000E+00  0.000E+00  0.000E+00  2.634E+06  1.856E+02  0.000E+00   0.0E+00
    2  102  1.159E+01  0.000E+00  0.000E+00  0.000E+00  4.062E+05  3.629E+00  0.000E+00   0.0E+00
    2  103  1.159E+01  0.000E+00  0.000E+00  0.000E+00  1.123E+06  5.143E-02  0.000E+00   0.0E+00
    2  104  1.158E+01  0.000E+00  0.000E+00  0.000E+00  0.000E+00  0.000E+00  7.978E-01   0.0E+00
    2  105  1.158E+01  2.727E+07  3.289E-07  6.268E-08  0.000E+00  0.000E+00  4.897E+01   9.5E-01
    2  107  1.158E+01  1.641E+08  3.297E-06  6.283E-07  0.000E+00  0.000E+00  2.244E+02   9.9E-01
    2  108  1.157E+01  4.000E+07  1.125E-06  2.143E-07  0.000E+00  0.000E+00  8.683E+00   1.0E+00
    2  109  1.157E+01  0.000E+00  0.000E+00  0.000E+00  5.295E+05  4.512E-02  0.000E+00   0.0E+00
    2  110  1.157E+01  2.508E+07  5.035E-07  9.591E-08  0.000E+00  0.000E+00  2.962E+02   9.8E-01
    2  111  1.157E+01  0.000E+00  0.000E+00  0.000E+00  3.882E+06  0.000E+00  0.000E+00   0.0E+00
    2  112  1.157E+01  3.996E+08  1.123E-05  2.139E-06  0.000E+00  0.000E+00  4.603E+02   1.0E+00
    2  113  1.157E+01  0.000E+00  0.000E+00  0.000E+00  0.000E+00  0.000E+00  1.160E+02   0.0E+00
    2  116  1.156E+01  0.000E+00  0.000E+00  0.000E+00  1.508E+04  0.000E+00  0.000E+00   0.0E+00
    2  118  1.152E+01  0.000E+00  0.000E+00  0.000E+00  2.442E+06  4.008E-04  0.000E+00   0.0E+00
    2  119  1.152E+01  0.000E+00  0.000E+00  0.000E+00  1.265E+07  0.000E+00  0.000E+00   0.0E+00
    2  120  1.151E+01  0.000E+00  0.000E+00  0.000E+00  6.383E+05  5.647E+00  0.000E+00   0.0E+00
    2  121  1.150E+01  0.000E+00  0.000E+00  0.000E+00  1.254E+06  1.436E-01  0.000E+00   0.0E+00
    2  122  1.116E+01  0.000E+00  0.000E+00  0.000E+00  1.588E+05  0.000E+00  0.000E+00   0.0E+00
    2  123  1.116E+01  0.000E+00  0.000E+00  0.000E+00  8.203E+04  7.997E+01  0.000E+00   0.0E+00
    2  124  1.104E+01  2.447E+06  2.683E-08  4.875E-09  0.000E+00  0.000E+00  3.646E+01   6.0E+00
    2  125  1.101E+01  0.000E+00  0.000E+00  0.000E+00  0.000E+00  0.000E+00  3.192E+02   0.0E+00
    2  126  1.100E+01  1.730E+07  1.883E-07  3.410E-08  0.000E+00  0.000E+00  3.466E+02   7.8E+00
    2  127  1.100E+01  4.695E+07  8.512E-07  1.541E-07  0.000E+00  0.000E+00  1.747E+01   6.9E-04
    2  128  1.087E+01  0.000E+00  0.000E+00  0.000E+00  2.130E+03  1.400E+01  0.000E+00   0.0E+00
    2  129  1.086E+01  0.000E+00  0.000E+00  0.000E+00  6.071E+04  2.728E+01  0.000E+00   0.0E+00
    2  130  1.085E+01  0.000E+00  0.000E+00  0.000E+00  2.104E+04  8.712E-02  0.000E+00   0.0E+00
    2  131  1.085E+01  0.000E+00  0.000E+00  0.000E+00  3.593E+04  1.354E+02  0.000E+00   0.0E+00
    2  132  1.078E+01  5.024E+06  1.226E-07  2.177E-08  0.000E+00  0.000E+00  2.523E-01   9.2E-01
    2  133  1.078E+01  2.586E+07  4.506E-07  7.996E-08  0.000E+00  0.000E+00  6.147E+00   8.7E-01
    2  134  1.078E+01  0.000E+00  0.000E+00  0.000E+00  0.000E+00  0.000E+00  2.922E+01   0.0E+00
    2  135  1.078E+01  2.322E+08  5.662E-06  1.005E-06  0.000E+00  0.000E+00  4.220E+02   8.8E-01
    2  136  1.077E+01  0.000E+00  0.000E+00  0.000E+00  2.381E+03  0.000E+00  0.000E+00   0.0E+00
    2  137  1.077E+01  0.000E+00  0.000E+00  0.000E+00  2.851E+04  6.112E-03  0.000E+00   0.0E+00
    2  139  1.077E+01  0.000E+00  0.000E+00  0.000E+00  1.845E+05  0.000E+00  0.000E+00   0.0E+00
    3    4  2.275E+02  3.012E+08  2.338E-03  5.253E-03  0.000E+00  0.000E+00  4.761E-02   8.6E-01
    3    5  2.159E+02  4.842E+09  5.642E-02  1.203E-01  0.000E+00  0.000E+00  3.255E-07   1.1E+00
    3    6  1.654E+02  0.000E+00  0.000E+00  0.000E+00  0.000E+00  0.000E+00  5.380E+01   0.0E+00
    3    7  1.647E+02  2.040E+10  8.296E-02  1.350E-01  0.000E+00  0.000E+00  8.430E+00   1.1E+00
    3    8  1.651E+02  0.000E+00  0.000E+00  0.000E+00  0.000E+00  4.333E+06  0.000E+00   0.0E+00
    3    9  1.614E+02  0.000E+00  0.000E+00  0.000E+00  5.808E+02  7.368E+05  0.000E+00   0.0E+00
    3   10  1.545E+02  1.302E+10  7.766E-02  1.185E-01  0.000E+00  0.000E+00  3.674E+01   1.0E+00
    3   11  1.244E+02  5.023E+10  3.887E-02  4.777E-02  0.000E+00  0.000E+00  0.000E+00   9.1E-01
    3   12  9.213E+01  7.044E+07  8.964E-05  8.156E-05  0.000E+00  0.000E+00  1.207E+00   1.6E+00
    3   13  8.501E+01  0.000E+00  0.000E+00  0.000E+00  0.000E+00  8.539E+03  0.000E+00   0.0E+00
    3   14  8.339E+01  0.000E+00  0.000E+00  0.000E+00  9.692E+03  2.056E+03  0.000E+00   0.0E+00
    3   15  8.127E+01  0.000E+00  0.000E+00  0.000E+00  7.242E+05  0.000E+00  0.000E+00   0.0E+00
    3   16  8.057E+01  0.000E+00  0.000E+00  0.000E+00  8.074E+03  2.384E+02  0.000E+00   0.0E+00
    3   18  8.026E+01  1.067E+08  1.030E-04  8.169E-05  0.000E+00  0.000E+00  2.058E+01   1.1E+00
    3   19  7.949E+01  5.620E+07  8.871E-05  6.964E-05  0.000E+00  0.000E+00  1.805E+00   4.4E-01
    3   20  7.878E+01  0.000E+00  0.000E+00  0.000E+00  1.444E+06  8.600E+01  0.000E+00   0.0E+00
    3   21  7.812E+01  2.357E+10  7.189E-03  5.547E-03  0.000E+00  0.000E+00  0.000E+00   7.9E-01
    3   22  7.694E+01  0.000E+00  0.000E+00  0.000E+00  7.232E+05  0.000E+00  0.000E+00   0.0E+00
    3   23  7.114E+01  0.000E+00  0.000E+00  0.000E+00  2.601E+06  1.161E+03  0.000E+00   0.0E+00
    3   24  5.376E+01  0.000E+00  0.000E+00  0.000E+00  2.188E+03  1.012E+02  0.000E+00   0.0E+00
    3   25  5.278E+01  0.000E+00  0.000E+00  0.000E+00  1.433E+03  1.374E+03  0.000E+00   0.0E+00
    3   26  5.239E+01  0.000E+00  0.000E+00  0.000E+00  1.836E+03  0.000E+00  0.000E+00   0.0E+00
    3   27  5.083E+01  0.000E+00  0.000E+00  0.000E+00  4.235E+05  4.034E+03  0.000E+00   0.0E+00
    3   28  4.417E+01  6.744E+10  1.972E-02  8.603E-03  0.000E+00  0.000E+00  1.046E+04   6.2E-01
    3   29  4.238E+01  2.739E+11  2.458E-02  1.029E-02  0.000E+00  0.000E+00  0.000E+00   5.9E-01
    3   30  3.646E+01  0.000E+00  0.000E+00  0.000E+00  0.000E+00  2.502E+04  0.000E+00   0.0E+00
    3   31  3.634E+01  0.000E+00  0.000E+00  0.000E+00  8.408E+03  8.540E+02  0.000E+00   0.0E+00
    3   32  3.447E+01  0.000E+00  0.000E+00  0.000E+00  1.941E+03  5.093E+02  0.000E+00   0.0E+00
    3   33  3.419E+01  0.000E+00  0.000E+00  0.000E+00  7.385E+03  1.022E+03  0.000E+00   0.0E+00
    3   34  2.860E+01  5.022E+05  6.161E-08  1.741E-08  0.000E+00  0.000E+00  1.614E+01   4.1E-01
    3   35  2.853E+01  1.028E+06  2.092E-07  5.895E-08  0.000E+00  0.000E+00  7.288E+01   1.8E-02
    3   36  2.835E+01  0.000E+00  0.000E+00  0.000E+00  0.000E+00  0.000E+00  1.063E+02   0.0E+00
    3   37  2.779E+01  8.485E+08  1.638E-04  4.496E-05  0.000E+00  0.000E+00  1.324E+01   6.7E-01
    3   38  1.741E+01  0.000E+00  0.000E+00  0.000E+00  1.128E+05  1.692E+04  0.000E+00   0.0E+00
    3   39  1.738E+01  0.000E+00  0.000E+00  0.000E+00  3.544E+06  3.612E+03  0.000E+00   0.0E+00
    3   40  1.683E+01  1.376E+11  5.847E-03  9.722E-04  0.000E+00  0.000E+00  2.849E+03   1.0E+00
    3   41  1.682E+01  1.368E+12  9.665E-02  1.605E-02  0.000E+00  0.000E+00  4.497E+01   9.9E-01
    3   42  1.666E+01  0.000E+00  0.000E+00  0.000E+00  0.000E+00  0.000E+00  5.582E+05   0.0E+00
    3   43  1.665E+01  2.239E+12  9.305E-02  1.530E-02  0.000E+00  0.000E+00  8.411E+04   9.9E-01
    3   44  1.661E+01  1.127E+12  7.774E-02  1.276E-02  0.000E+00  0.000E+00  2.743E+05   1.0E+00
    3   45  1.644E+01  2.149E+12  2.901E-02  4.709E-03  0.000E+00  0.000E+00  0.000E+00   1.0E+00
    3   46  1.607E+01  0.000E+00  0.000E+00  0.000E+00  0.000E+00  4.792E+01  0.000E+00   0.0E+00
    3   47  1.605E+01  0.000E+00  0.000E+00  0.000E+00  1.622E+07  4.718E+02  0.000E+00   0.0E+00
    3   48  1.603E+01  0.000E+00  0.000E+00  0.000E+00  2.655E+09  0.000E+00  0.000E+00   0.0E+00
    3   49  1.601E+01  0.000E+00  0.000E+00  0.000E+00  4.199E+07  2.474E+02  0.000E+00   0.0E+00
    3   51  1.598E+01  0.000E+00  0.000E+00  0.000E+00  4.526E+09  5.175E+01  0.000E+00   0.0E+00
    3   52  1.596E+01  0.000E+00  0.000E+00  0.000E+00  1.994E+09  0.000E+00  0.000E+00   0.0E+00
    3   53  1.585E+01  0.000E+00  0.000E+00  0.000E+00  4.549E+09  2.532E+02  0.000E+00   0.0E+00
    3   54  1.569E+01  4.267E+08  1.576E-05  2.442E-06  0.000E+00  0.000E+00  2.286E+02   9.8E-01
    3   56  1.568E+01  1.182E+05  7.261E-09  1.124E-09  0.000E+00  0.000E+00  5.975E+02   2.4E+00
    3   58  1.566E+01  0.000E+00  0.000E+00  0.000E+00  0.000E+00  0.000E+00  5.251E+00   0.0E+00
    3   59  1.566E+01  7.062E+09  4.328E-04  6.693E-05  0.000E+00  0.000E+00  1.092E+03   1.0E+00
    3   60  1.566E+01  0.000E+00  0.000E+00  0.000E+00  0.000E+00  0.000E+00  2.775E+03   0.0E+00
    3   61  1.567E+01  0.000E+00  0.000E+00  0.000E+00  0.000E+00  1.406E+03  0.000E+00   0.0E+00
    3   63  1.565E+01  0.000E+00  0.000E+00  0.000E+00  8.224E+07  2.431E+02  0.000E+00   0.0E+00
    3   64  1.520E+01  9.375E+08  3.248E-05  4.877E-06  0.000E+00  0.000E+00  4.232E+01   1.3E+00
    3   65  1.508E+01  1.548E+09  1.760E-05  2.621E-06  0.000E+00  0.000E+00  0.000E+00   1.6E+00
    3   66  1.505E+01  1.131E+08  3.842E-06  5.711E-07  0.000E+00  0.000E+00  1.812E+03   2.4E+00
    3   67  1.504E+01  1.592E+09  9.004E-05  1.338E-05  0.000E+00  0.000E+00  5.353E+02   1.2E+00
    3   68  1.455E+01  0.000E+00  0.000E+00  0.000E+00  1.615E+06  7.554E-03  0.000E+00   0.0E+00
    3   69  1.452E+01  0.000E+00  0.000E+00  0.000E+00  1.052E+06  1.603E+01  0.000E+00   0.0E+00
    3   70  1.451E+01  0.000E+00  0.000E+00  0.000E+00  3.581E+06  0.000E+00  0.000E+00   0.0E+00
    3   71  1.447E+01  0.000E+00  0.000E+00  0.000E+00  2.207E+06  7.675E+01  0.000E+00   0.0E+00
    3   72  1.426E+01  0.000E+00  0.000E+00  0.000E+00  0.000E+00  0.000E+00  1.154E+02   0.0E+00
    3   73  1.425E+01  2.883E+09  1.462E-04  2.058E-05  0.000E+00  0.000E+00  4.494E+02   1.0E+00
    3   75  1.424E+01  0.000E+00  0.000E+00  0.000E+00  0.000E+00  0.000E+00  3.658E+02   0.0E+00
    3   76  1.248E+01  1.298E+09  3.031E-05  3.735E-06  0.000E+00  0.000E+00  2.602E+02   8.8E-01
    3   77  1.243E+01  3.304E+08  2.549E-06  3.128E-07  0.000E+00  0.000E+00  0.000E+00   1.0E+00
    3   78  1.218E+01  0.000E+00  0.000E+00  0.000E+00  0.000E+00  7.190E+01  0.000E+00   0.0E+00
    3   79  1.217E+01  0.000E+00  0.000E+00  0.000E+00  2.642E+03  1.380E+02  0.000E+00   0.0E+00
    3   80  1.210E+01  0.000E+00  0.000E+00  0.000E+00  4.553E+05  5.750E+03  0.000E+00   0.0E+00
    3   81  1.207E+01  0.000E+00  0.000E+00  0.000E+00  1.658E+06  6.401E+02  0.000E+00   0.0E+00
    3   82  1.205E+01  0.000E+00  0.000E+00  0.000E+00  4.978E+04  4.532E+03  0.000E+00   0.0E+00
    3   83  1.204E+01  0.000E+00  0.000E+00  0.000E+00  8.445E+04  1.360E+04  0.000E+00   0.0E+00
    3   84  1.191E+01  1.057E+11  2.249E-03  2.647E-04  0.000E+00  0.000E+00  1.724E+03   1.0E+00
    3   85  1.191E+01  7.750E+11  2.749E-02  3.234E-03  0.000E+00  0.000E+00  1.012E+02   9.8E-01
    3   86  1.187E+01  0.000E+00  0.000E+00  0.000E+00  0.000E+00  0.000E+00  6.150E+05   0.0E+00
    3   87  1.187E+01  1.258E+12  2.656E-02  3.113E-03  0.000E+00  0.000E+00  9.249E+04   9.7E-01
    3   88  1.186E+01  6.314E+11  2.220E-02  2.600E-03  0.000E+00  0.000E+00  3.101E+05   1.0E+00
    3   89  1.182E+01  1.291E+12  9.005E-03  1.051E-03  0.000E+00  0.000E+00  0.000E+00   1.0E+00
    3   90  1.176E+01  1.960E+09  4.065E-05  4.723E-06  0.000E+00  0.000E+00  6.837E+02   8.6E-01
    3   91  1.176E+01  2.545E+09  8.789E-05  1.020E-05  0.000E+00  0.000E+00  5.764E+02   8.7E-01
    3   92  1.174E+01  0.000E+00  0.000E+00  0.000E+00  0.000E+00  0.000E+00  6.150E+03   0.0E+00
    3   93  1.172E+01  0.000E+00  0.000E+00  0.000E+00  0.000E+00  9.416E+01  0.000E+00   0.0E+00
    3   94  1.172E+01  0.000E+00  0.000E+00  0.000E+00  3.561E+06  7.629E+02  0.000E+00   0.0E+00
    3   95  1.171E+01  0.000E+00  0.000E+00  0.000E+00  1.195E+09  0.000E+00  0.000E+00   0.0E+00
    3   96  1.171E+01  0.000E+00  0.000E+00  0.000E+00  6.006E+07  2.448E+02  0.000E+00   0.0E+00
    3   98  1.170E+01  0.000E+00  0.000E+00  0.000E+00  1.997E+09  6.417E+01  0.000E+00   0.0E+00
    3   99  1.171E+01  1.774E+09  6.075E-05  7.024E-06  0.000E+00  0.000E+00  1.036E+03   1.1E+00
    3  100  1.169E+01  0.000E+00  0.000E+00  0.000E+00  8.932E+08  0.000E+00  0.000E+00   0.0E+00
    3  101  1.166E+01  0.000E+00  0.000E+00  0.000E+00  2.186E+09  1.255E+02  0.000E+00   0.0E+00
    3  102  1.163E+01  0.000E+00  0.000E+00  0.000E+00  1.198E+06  4.657E-02  0.000E+00   0.0E+00
    3  103  1.162E+01  0.000E+00  0.000E+00  0.000E+00  1.125E+05  0.000E+00  0.000E+00   0.0E+00
    3  105  1.162E+01  1.922E+08  3.889E-06  4.462E-07  0.000E+00  0.000E+00  2.627E+02   9.8E-01
    3  107  1.161E+01  2.319E+08  7.817E-06  8.968E-07  0.000E+00  0.000E+00  1.377E+02   1.0E+00
    3  108  1.161E+01  0.000E+00  0.000E+00  0.000E+00  0.000E+00  0.000E+00  1.195E+02   0.0E+00
    3  109  1.161E+01  0.000E+00  0.000E+00  0.000E+00  2.174E+06  0.000E+00  0.000E+00   0.0E+00
    3  110  1.161E+01  2.544E+09  8.568E-05  9.825E-06  0.000E+00  0.000E+00  1.196E+03   1.0E+00
    3  112  1.161E+01  0.000E+00  0.000E+00  0.000E+00  0.000E+00  0.000E+00  1.781E+03   0.0E+00
    3  118  1.156E+01  0.000E+00  0.000E+00  0.000E+00  1.720E+06  0.000E+00  0.000E+00   0.0E+00
    3  120  1.155E+01  0.000E+00  0.000E+00  0.000E+00  1.896E+06  1.100E+00  0.000E+00   0.0E+00
    3  121  1.154E+01  0.000E+00  0.000E+00  0.000E+00  2.219E+06  0.000E+00  0.000E+00   0.0E+00
    3  122  1.120E+01  0.000E+00  0.000E+00  0.000E+00  0.000E+00  8.076E+02  0.000E+00   0.0E+00
    3  123  1.119E+01  0.000E+00  0.000E+00  0.000E+00  3.781E+05  2.226E+02  0.000E+00   0.0E+00
    3  124  1.107E+01  7.819E+08  1.438E-05  1.572E-06  0.000E+00  0.000E+00  8.330E+00   1.5E+00
    3  125  1.105E+01  2.752E+08  1.678E-06  1.831E-07  0.000E+00  0.000E+00  0.000E+00   2.1E-01
    3  126  1.103E+01  1.652E+08  3.015E-06  3.286E-07  0.000E+00  0.000E+00  1.561E+03   2.2E+00
    3  127  1.103E+01  1.120E+09  3.407E-05  3.712E-06  0.000E+00  0.000E+00  6.007E+02   1.3E+00
    3  128  1.090E+01  0.000E+00  0.000E+00  0.000E+00  1.231E+06  2.633E-03  0.000E+00   0.0E+00
    3  129  1.089E+01  0.000E+00  0.000E+00  0.000E+00  8.549E+05  3.004E+00  0.000E+00   0.0E+00
    3  130  1.089E+01  0.000E+00  0.000E+00  0.000E+00  1.992E+06  0.000E+00  0.000E+00   0.0E+00
    3  131  1.088E+01  0.000E+00  0.000E+00  0.000E+00  1.830E+04  1.524E+01  0.000E+00   0.0E+00
    3  132  1.082E+01  0.000E+00  0.000E+00  0.000E+00  0.000E+00  0.000E+00  7.840E+01   0.0E+00
    3  133  1.081E+01  1.268E+09  3.706E-05  3.958E-06  0.000E+00  0.000E+00  3.100E+02   1.0E+00
    3  135  1.081E+01  0.000E+00  0.000E+00  0.000E+00  0.000E+00  0.000E+00  2.805E+02   0.0E+00
    3  137  1.080E+01  0.000E+00  0.000E+00  0.000E+00  1.447E+06  0.000E+00  0.000E+00   0.0E+00
    4    5  4.246E+03  0.000E+00  0.000E+00  0.000E+00  3.261E-05  4.065E+01  0.000E+00   0.0E+00
    4    6  6.064E+02  0.000E+00  0.000E+00  0.000E+00  4.947E+01  0.000E+00  0.000E+00   0.0E+00
    4    7  5.966E+02  0.000E+00  0.000E+00  0.000E+00  3.093E+00  2.739E+04  0.000E+00   0.0E+00
    4    8  6.022E+02  1.206E+06  2.186E-05  1.300E-04  0.000E+00  0.000E+00  0.000E+00   3.4E+00
    4    9  5.550E+02  6.426E+05  2.968E-05  1.627E-04  0.000E+00  0.000E+00  1.746E-03   3.6E+00
    4   10  4.815E+02  0.000E+00  0.000E+00  0.000E+00  3.899E+01  3.386E+04  0.000E+00   0.0E+00
    4   11  2.746E+02  0.000E+00  0.000E+00  0.000E+00  0.000E+00  7.147E+05  0.000E+00   0.0E+00
    4   12  1.548E+02  0.000E+00  0.000E+00  0.000E+00  3.406E+02  6.780E+05  0.000E+00   0.0E+00
    4   13  1.357E+02  3.048E+10  2.806E-02  3.761E-02  0.000E+00  0.000E+00  0.000E+00   1.1E+00
    4   14  1.316E+02  2.545E+10  6.610E-02  8.592E-02  0.000E+00  0.000E+00  1.190E+01   1.1E+00
    4   15  1.264E+02  0.000E+00  0.000E+00  0.000E+00  0.000E+00  0.000E+00  5.035E+00   0.0E+00
    4   16  1.247E+02  1.385E+10  5.386E-02  6.635E-02  0.000E+00  0.000E+00  1.054E+01   9.9E-01
    4   18  1.240E+02  0.000E+00  0.000E+00  0.000E+00  2.508E+01  1.212E+05  0.000E+00   0.0E+00
    4   19  1.222E+02  0.000E+00  0.000E+00  0.000E+00  3.394E+01  1.692E+04  0.000E+00   0.0E+00
    4   20  1.205E+02  2.014E+09  7.306E-03  8.694E-03  0.000E+00  0.000E+00  5.958E+01   1.1E+00
    4   21  1.190E+02  0.000E+00  0.000E+00  0.000E+00  0.000E+00  4.458E+06  0.000E+00   0.0E+00
    4   22  1.162E+02  0.000E+00  0.000E+00  0.000E+00  0.000E+00  0.000E+00  9.483E+00   0.0E+00
    4   23  1.035E+02  3.122E+09  5.014E-03  5.125E-03  0.000E+00  0.000E+00  3.075E+02   8.2E-01
    4   24  7.040E+01  5.054E+07  6.258E-05  4.351E-05  0.000E+00  0.000E+00  1.240E+00   7.7E-01
    4   25  6.871E+01  7.475E+07  8.819E-05  5.985E-05  0.000E+00  0.000E+00  8.307E+00   6.6E-01
    4   26  6.806E+01  0.000E+00  0.000E+00  0.000E+00  0.000E+00  0.000E+00  3.378E+00   0.0E+00
    4   27  6.545E+01  4.004E+06  2.572E-06  1.662E-06  0.000E+00  0.000E+00  7.877E+01   2.8E-01
    4   28  5.481E+01  0.000E+00  0.000E+00  0.000E+00  1.077E+03  7.618E+03  0.000E+00   0.0E+00
    4   29  5.208E+01  0.000E+00  0.000E+00  0.000E+00  0.000E+00  1.004E+04  0.000E+00   0.0E+00
    4   30  4.342E+01  3.010E+11  2.835E-02  1.216E-02  0.000E+00  0.000E+00  0.000E+00   6.2E-01
    4   31  4.324E+01  4.964E+10  1.392E-02  5.943E-03  0.000E+00  0.000E+00  1.024E+04   6.4E-01
    4   32  4.063E+01  7.645E+08  3.153E-04  1.265E-04  0.000E+00  0.000E+00  8.219E+02   2.7E-01
    4   33  4.024E+01  1.810E+09  4.395E-04  1.747E-04  0.000E+00  0.000E+00  1.271E+02   7.0E-01
    4   34  3.272E+01  0.000E+00  0.000E+00  0.000E+00  1.216E+06  1.586E+03  0.000E+00   0.0E+00
    4   35  3.262E+01  0.000E+00  0.000E+00  0.000E+00  6.670E+05  7.334E+00  0.000E+00   0.0E+00
    4   36  3.238E+01  0.000E+00  0.000E+00  0.000E+00  1.961E+05  0.000E+00  0.000E+00   0.0E+00
    4   37  3.166E+01  0.000E+00  0.000E+00  0.000E+00  3.252E+03  1.050E+00  0.000E+00   0.0E+00
    4   38  1.885E+01  5.456E+11  4.843E-02  9.014E-03  0.000E+00  0.000E+00  8.643E+03   1.0E+00
    4   39  1.881E+01  2.416E+10  1.282E-03  2.382E-04  0.000E+00  0.000E+00  3.445E+03   9.7E-01
    4   40  1.818E+01  0.000E+00  0.000E+00  0.000E+00  1.400E+07  3.634E+02  0.000E+00   0.0E+00
    4   41  1.816E+01  0.000E+00  0.000E+00  0.000E+00  3.338E+07  1.209E+04  0.000E+00   0.0E+00
    4   42  1.797E+01  0.000E+00  0.000E+00  0.000E+00  8.512E+08  0.000E+00  0.000E+00   0.0E+00
    4   43  1.796E+01  0.000E+00  0.000E+00  0.000E+00  3.195E+07  3.159E+05  0.000E+00   0.0E+00
    4   44  1.792E+01  0.000E+00  0.000E+00  0.000E+00  2.158E+08  2.506E+05  0.000E+00   0.0E+00
    4   45  1.772E+01  0.000E+00  0.000E+00  0.000E+00  0.000E+00  2.653E+05  0.000E+00   0.0E+00
    4   46  1.730E+01  5.505E+12  8.229E-02  1.406E-02  0.000E+00  0.000E+00  0.000E+00   9.9E-01
    4   47  1.727E+01  4.013E+12  1.794E-01  3.060E-02  0.000E+00  0.000E+00  7.542E+04   9.9E-01
    4   48  1.724E+01  0.000E+00  0.000E+00  0.000E+00  0.000E+00  0.000E+00  3.637E+04   0.0E+00
    4   49  1.723E+01  1.965E+12  1.456E-01  2.478E-02  0.000E+00  0.000E+00  2.521E+04   1.0E+00
    4   51  1.719E+01  5.643E+10  4.168E-03  7.077E-04  0.000E+00  0.000E+00  3.620E+05   9.8E-01
    4   52  1.716E+01  0.000E+00  0.000E+00  0.000E+00  0.000E+00  0.000E+00  4.088E+04   0.0E+00
    4   53  1.704E+01  1.375E+11  5.985E-03  1.007E-03  0.000E+00  0.000E+00  7.846E+05   1.0E+00
    4   54  1.686E+01  0.000E+00  0.000E+00  0.000E+00  6.533E+09  3.089E+02  0.000E+00   0.0E+00
    4   56  1.684E+01  0.000E+00  0.000E+00  0.000E+00  3.664E+09  1.951E+01  0.000E+00   0.0E+00
    4   58  1.682E+01  0.000E+00  0.000E+00  0.000E+00  2.071E+09  0.000E+00  0.000E+00   0.0E+00
    4   59  1.682E+01  0.000E+00  0.000E+00  0.000E+00  8.377E+08  3.375E+01  0.000E+00   0.0E+00
    4   60  1.681E+01  0.000E+00  0.000E+00  0.000E+00  4.319E+06  0.000E+00  0.000E+00   0.0E+00
    4   61  1.683E+01  3.098E+06  4.384E-08  7.287E-09  0.000E+00  0.000E+00  0.000E+00   1.1E+02
    4   63  1.681E+01  2.692E+09  1.141E-04  1.894E-05  0.000E+00  0.000E+00  7.945E+03   1.4E+00
    4   64  1.629E+01  0.000E+00  0.000E+00  0.000E+00  1.090E+07  1.873E+03  0.000E+00   0.0E+00
    4   65  1.615E+01  0.000E+00  0.000E+00  0.000E+00  0.000E+00  1.007E+04  0.000E+00   0.0E+00
    4   66  1.612E+01  0.000E+00  0.000E+00  0.000E+00  1.647E+06  8.505E+00  0.000E+00   0.0E+00
    4   67  1.611E+01  0.000E+00  0.000E+00  0.000E+00  3.394E+06  2.414E+02  0.000E+00   0.0E+00
    4   68  1.554E+01  9.574E+07  5.779E-06  8.870E-07  0.000E+00  0.000E+00  1.572E+01   1.3E+00
    4   69  1.551E+01  1.141E+10  6.856E-04  1.050E-04  0.000E+00  0.000E+00  6.916E+03   1.1E+00
    4   70  1.549E+01  0.000E+00  0.000E+00  0.000E+00  0.000E+00  0.000E+00  1.072E+03   0.0E+00
    4   71  1.546E+01  2.184E+09  7.825E-05  1.195E-05  0.000E+00  0.000E+00  1.167E+03   1.2E+00
    4   72  1.521E+01  0.000E+00  0.000E+00  0.000E+00  5.076E+03  0.000E+00  0.000E+00   0.0E+00
    4   73  1.520E+01  0.000E+00  0.000E+00  0.000E+00  4.725E+06  4.043E+01  0.000E+00   0.0E+00
    4   75  1.519E+01  0.000E+00  0.000E+00  0.000E+00  2.679E+07  0.000E+00  0.000E+00   0.0E+00
    4   76  1.320E+01  0.000E+00  0.000E+00  0.000E+00  8.253E+04  2.146E+02  0.000E+00   0.0E+00
    4   77  1.314E+01  0.000E+00  0.000E+00  0.000E+00  0.000E+00  4.496E+03  0.000E+00   0.0E+00
    4   78  1.286E+01  1.177E+10  9.731E-05  1.236E-05  0.000E+00  0.000E+00  0.000E+00   1.1E+00
    4   79  1.286E+01  2.856E+09  7.084E-05  8.999E-06  0.000E+00  0.000E+00  9.492E+01   1.6E+00
    4   80  1.278E+01  1.600E+11  6.525E-03  8.233E-04  0.000E+00  0.000E+00  8.030E+03   1.0E+00
    4   81  1.274E+01  9.209E+09  2.243E-04  2.823E-05  0.000E+00  0.000E+00  7.093E+03   1.2E+00
    4   82  1.272E+01  8.306E+09  2.015E-04  2.531E-05  0.000E+00  0.000E+00  3.852E+02   8.8E-01
    4   83  1.271E+01  1.006E+11  4.062E-03  5.099E-04  0.000E+00  0.000E+00  1.474E+03   1.0E+00
    4   84  1.257E+01  0.000E+00  0.000E+00  0.000E+00  8.928E+06  8.370E+02  0.000E+00   0.0E+00
    4   85  1.257E+01  0.000E+00  0.000E+00  0.000E+00  1.912E+07  1.097E+04  0.000E+00   0.0E+00
    4   86  1.253E+01  0.000E+00  0.000E+00  0.000E+00  4.941E+08  0.000E+00  0.000E+00   0.0E+00
    4   87  1.252E+01  0.000E+00  0.000E+00  0.000E+00  1.823E+07  2.189E+05  0.000E+00   0.0E+00
    4   88  1.251E+01  0.000E+00  0.000E+00  0.000E+00  1.229E+08  1.779E+05  0.000E+00   0.0E+00
    4   89  1.246E+01  0.000E+00  0.000E+00  0.000E+00  0.000E+00  1.866E+05  0.000E+00   0.0E+00
    4   90  1.240E+01  0.000E+00  0.000E+00  0.000E+00  4.980E+05  6.329E+02  0.000E+00   0.0E+00
    4   91  1.240E+01  0.000E+00  0.000E+00  0.000E+00  2.019E+06  3.291E+01  0.000E+00   0.0E+00
    4   92  1.238E+01  0.000E+00  0.000E+00  0.000E+00  4.585E+05  0.000E+00  0.000E+00   0.0E+00
    4   93  1.236E+01  2.949E+12  2.251E-02  2.747E-03  0.000E+00  0.000E+00  0.000E+00   9.8E-01
    4   94  1.235E+01  2.149E+12  4.915E-02  5.996E-03  0.000E+00  0.000E+00  6.643E+04   1.0E+00
    4   95  1.235E+01  0.000E+00  0.000E+00  0.000E+00  0.000E+00  0.000E+00  3.910E+04   0.0E+00
    4   96  1.234E+01  1.082E+12  4.119E-02  5.021E-03  0.000E+00  0.000E+00  1.261E+04   1.0E+00
    4   98  1.233E+01  1.001E+10  3.805E-04  4.635E-05  0.000E+00  0.000E+00  3.945E+05   9.3E-01
    4   99  1.234E+01  0.000E+00  0.000E+00  0.000E+00  2.185E+04  4.465E+02  0.000E+00   0.0E+00
    4  100  1.233E+01  0.000E+00  0.000E+00  0.000E+00  0.000E+00  0.000E+00  4.348E+04   0.0E+00
    4  101  1.229E+01  6.793E+10  1.539E-03  1.869E-04  0.000E+00  0.000E+00  8.802E+05   1.1E+00
    4  102  1.226E+01  2.464E+07  9.249E-07  1.120E-07  0.000E+00  0.000E+00  1.974E+02   1.3E+00
    4  103  1.225E+01  0.000E+00  0.000E+00  0.000E+00  0.000E+00  0.000E+00  1.876E-01   0.0E+00
    4  105  1.224E+01  0.000E+00  0.000E+00  0.000E+00  6.552E+08  1.157E+02  0.000E+00   0.0E+00
    4  107  1.224E+01  0.000E+00  0.000E+00  0.000E+00  4.361E+08  2.844E+01  0.000E+00   0.0E+00
    4  108  1.224E+01  0.000E+00  0.000E+00  0.000E+00  1.903E+08  0.000E+00  0.000E+00   0.0E+00
    4  109  1.224E+01  0.000E+00  0.000E+00  0.000E+00  0.000E+00  0.000E+00  5.991E+01   0.0E+00
    4  110  1.223E+01  0.000E+00  0.000E+00  0.000E+00  1.426E+07  5.953E+00  0.000E+00   0.0E+00
    4  112  1.223E+01  0.000E+00  0.000E+00  0.000E+00  2.404E+07  0.000E+00  0.000E+00   0.0E+00
    4  118  1.218E+01  0.000E+00  0.000E+00  0.000E+00  0.000E+00  0.000E+00  1.103E+02   0.0E+00
    4  120  1.217E+01  1.643E+08  6.077E-06  7.302E-07  0.000E+00  0.000E+00  2.579E+02   1.0E+00
    4  121  1.216E+01  0.000E+00  0.000E+00  0.000E+00  0.000E+00  0.000E+00  1.833E+01   0.0E+00
    4  122  1.178E+01  6.588E+08  4.565E-06  5.310E-07  0.000E+00  0.000E+00  0.000E+00   2.8E+00
    4  123  1.177E+01  5.181E+08  1.077E-05  1.252E-06  0.000E+00  0.000E+00  3.296E+02   1.9E+00
    4  124  1.164E+01  0.000E+00  0.000E+00  0.000E+00  2.925E+06  1.185E+03  0.000E+00   0.0E+00
    4  125  1.161E+01  0.000E+00  0.000E+00  0.000E+00  0.000E+00  6.889E+03  0.000E+00   0.0E+00
    4  126  1.160E+01  0.000E+00  0.000E+00  0.000E+00  6.039E+05  4.617E+01  0.000E+00   0.0E+00
    4  127  1.160E+01  0.000E+00  0.000E+00  0.000E+00  1.147E+06  1.378E+02  0.000E+00   0.0E+00
    4  128  1.145E+01  2.006E+07  6.570E-07  7.428E-08  0.000E+00  0.000E+00  6.345E-01   1.5E+00
    4  129  1.144E+01  7.873E+09  2.574E-04  2.907E-05  0.000E+00  0.000E+00  8.095E+03   1.1E+00
    4  130  1.143E+01  0.000E+00  0.000E+00  0.000E+00  0.000E+00  0.000E+00  1.089E+03   0.0E+00
    4  131  1.143E+01  1.773E+09  3.471E-05  3.917E-06  0.000E+00  0.000E+00  1.087E+02   1.2E+00
    4  132  1.136E+01  0.000E+00  0.000E+00  0.000E+00  3.614E+03  0.000E+00  0.000E+00   0.0E+00
    4  133  1.135E+01  0.000E+00  0.000E+00  0.000E+00  6.959E+05  1.943E+01  0.000E+00   0.0E+00
    4  135  1.135E+01  0.000E+00  0.000E+00  0.000E+00  3.867E+06  0.000E+00  0.000E+00   0.0E+00
    4  137  1.134E+01  0.000E+00  0.000E+00  0.000E+00  0.000E+00  0.000E+00  1.073E+00   0.0E+00
    5    6  7.074E+02  0.000E+00  0.000E+00  0.000E+00  1.331E+01  2.653E+04  0.000E+00   0.0E+00
    5    7  6.941E+02  0.000E+00  0.000E+00  0.000E+00  3.416E+01  1.227E+04  0.000E+00   0.0E+00
    5    8  7.017E+02  0.000E+00  0.000E+00  0.000E+00  0.000E+00  0.000E+00  1.717E-04   0.0E+00
    5    9  6.385E+02  1.752E+04  6.426E-07  6.753E-06  0.000E+00  0.000E+00  1.429E-04   1.3E-01
    5   10  5.431E+02  0.000E+00  0.000E+00  0.000E+00  9.187E+01  2.587E+04  0.000E+00   0.0E+00
    5   11  2.936E+02  0.000E+00  0.000E+00  0.000E+00  3.069E+03  0.000E+00  0.000E+00   0.0E+00
    5   12  1.607E+02  0.000E+00  0.000E+00  0.000E+00  1.578E+03  3.626E+06  0.000E+00   0.0E+00
    5   13  1.402E+02  0.000E+00  0.000E+00  0.000E+00  0.000E+00  0.000E+00  3.709E+00   0.0E+00
    5   14  1.358E+02  3.239E+09  5.375E-03  1.202E-02  0.000E+00  0.000E+00  1.179E+01   1.1E+00
    5   15  1.303E+02  3.161E+10  1.126E-01  2.416E-01  0.000E+00  0.000E+00  4.369E+00   1.0E+00
    5   16  1.285E+02  1.056E+10  2.615E-02  5.531E-02  0.000E+00  0.000E+00  1.958E+01   1.0E+00
    5   17  1.282E+02  0.000E+00  0.000E+00  0.000E+00  0.000E+00  0.000E+00  6.788E+01   0.0E+00
    5   18  1.277E+02  0.000E+00  0.000E+00  0.000E+00  1.974E+02  1.328E+03  0.000E+00   0.0E+00
    5   19  1.258E+02  0.000E+00  0.000E+00  0.000E+00  1.465E+02  2.156E+02  0.000E+00   0.0E+00
    5   20  1.240E+02  7.032E+09  1.621E-02  3.310E-02  0.000E+00  0.000E+00  4.357E+00   9.8E-01
    5   21  1.224E+02  0.000E+00  0.000E+00  0.000E+00  3.442E+03  0.000E+00  0.000E+00   0.0E+00
    5   22  1.195E+02  7.870E+07  2.360E-04  4.642E-04  0.000E+00  0.000E+00  5.364E+01   9.2E-01
    5   23  1.061E+02  1.144E+09  1.158E-03  2.023E-03  0.000E+00  0.000E+00  2.315E+00   1.5E+00
    5   24  7.158E+01  6.935E+07  5.327E-05  6.277E-05  0.000E+00  0.000E+00  1.031E-01   7.5E-01
    5   25  6.984E+01  1.902E+08  1.391E-04  1.600E-04  0.000E+00  0.000E+00  8.584E+00   7.1E-01
    5   26  6.917E+01  2.136E+07  2.144E-05  2.442E-05  0.000E+00  0.000E+00  1.406E+00   5.1E-01
    5   27  6.648E+01  8.701E+08  3.459E-04  3.785E-04  0.000E+00  0.000E+00  2.530E-02   2.5E-01
    5   28  5.552E+01  0.000E+00  0.000E+00  0.000E+00  1.161E+04  6.953E+03  0.000E+00   0.0E+00
    5   29  5.272E+01  0.000E+00  0.000E+00  0.000E+00  4.556E+04  0.000E+00  0.000E+00   0.0E+00
    5   30  4.387E+01  0.000E+00  0.000E+00  0.000E+00  0.000E+00  0.000E+00  2.050E+04   0.0E+00
    5   31  4.369E+01  2.949E+11  5.063E-02  3.641E-02  0.000E+00  0.000E+00  1.005E+04   6.0E-01
    5   32  4.102E+01  4.889E+08  1.233E-04  8.327E-05  0.000E+00  0.000E+00  1.598E+01   1.7E-01
    5   33  4.062E+01  2.065E+09  3.066E-04  2.050E-04  0.000E+00  0.000E+00  1.515E+02   7.2E-01
    5   34  3.297E+01  0.000E+00  0.000E+00  0.000E+00  3.940E+04  7.224E+03  0.000E+00   0.0E+00
    5   35  3.288E+01  0.000E+00  0.000E+00  0.000E+00  6.147E+04  2.528E+01  0.000E+00   0.0E+00
    5   36  3.263E+01  0.000E+00  0.000E+00  0.000E+00  3.287E+04  1.514E+02  0.000E+00   0.0E+00
    5   37  3.190E+01  0.000E+00  0.000E+00  0.000E+00  8.981E+01  3.206E+01  0.000E+00   0.0E+00
    5   38  1.893E+01  4.425E+11  2.378E-02  7.409E-03  0.000E+00  0.000E+00  4.799E+01   1.0E+00
    5   39  1.890E+01  7.692E+11  2.471E-02  7.686E-03  0.000E+00  0.000E+00  4.696E-01   1.0E+00
    5   40  1.826E+01  0.000E+00  0.000E+00  0.000E+00  3.906E+07  2.330E+03  0.000E+00   0.0E+00
    5   41  1.824E+01  0.000E+00  0.000E+00  0.000E+00  6.089E+05  3.864E+03  0.000E+00   0.0E+00
    5   42  1.805E+01  0.000E+00  0.000E+00  0.000E+00  4.812E+08  4.310E+05  0.000E+00   0.0E+00
    5   43  1.804E+01  0.000E+00  0.000E+00  0.000E+00  1.084E+09  7.905E+04  0.000E+00   0.0E+00
    5   44  1.800E+01  0.000E+00  0.000E+00  0.000E+00  8.533E+08  2.336E+05  0.000E+00   0.0E+00
    5   45  1.779E+01  0.000E+00  0.000E+00  0.000E+00  1.235E+09  0.000E+00  0.000E+00   0.0E+00
    5   46  1.737E+01  0.000E+00  0.000E+00  0.000E+00  0.000E+00  0.000E+00  7.068E+04   0.0E+00
    5   47  1.734E+01  6.662E+11  1.802E-02  5.143E-03  0.000E+00  0.000E+00  9.584E+04   9.8E-01
    5   48  1.731E+01  4.707E+12  2.961E-01  8.436E-02  0.000E+00  0.000E+00  3.410E+04   9.9E-01
    5   49  1.730E+01  1.787E+12  8.014E-02  2.281E-02  0.000E+00  0.000E+00  1.303E+05   1.0E+00
    5   50  1.729E+01  0.000E+00  0.000E+00  0.000E+00  0.000E+00  0.000E+00  5.039E+05   0.0E+00
    5   51  1.726E+01  5.112E+11  2.284E-02  6.490E-03  0.000E+00  0.000E+00  4.907E+04   1.0E+00
    5   52  1.723E+01  9.092E+09  5.665E-04  1.607E-04  0.000E+00  0.000E+00  2.743E+05   1.0E+00
    5   53  1.711E+01  9.761E+10  2.570E-03  7.239E-04  0.000E+00  0.000E+00  1.011E+04   9.1E-01
    5   54  1.692E+01  0.000E+00  0.000E+00  0.000E+00  6.164E+08  5.427E+02  0.000E+00   0.0E+00
    5   55  1.692E+01  0.000E+00  0.000E+00  0.000E+00  6.242E+09  0.000E+00  0.000E+00   0.0E+00
    5   56  1.691E+01  0.000E+00  0.000E+00  0.000E+00  1.132E+09  2.813E+01  0.000E+00   0.0E+00
    5   58  1.689E+01  0.000E+00  0.000E+00  0.000E+00  3.383E+09  1.487E+01  0.000E+00   0.0E+00
    5   59  1.688E+01  0.000E+00  0.000E+00  0.000E+00  7.150E+08  1.362E+01  0.000E+00   0.0E+00
    5   60  1.688E+01  0.000E+00  0.000E+00  0.000E+00  3.423E+08  2.377E+01  0.000E+00   0.0E+00
    5   61  1.690E+01  0.000E+00  0.000E+00  0.000E+00  0.000E+00  0.000E+00  1.325E+03   0.0E+00
    5   62  1.687E+01  0.000E+00  0.000E+00  0.000E+00  4.769E+07  0.000E+00  0.000E+00   0.0E+00
    5   63  1.688E+01  1.394E+09  3.573E-05  9.927E-06  0.000E+00  0.000E+00  2.354E+00   1.2E+00
    5   64  1.635E+01  0.000E+00  0.000E+00  0.000E+00  7.320E+05  3.344E+03  0.000E+00   0.0E+00
    5   65  1.621E+01  0.000E+00  0.000E+00  0.000E+00  2.898E+06  0.000E+00  0.000E+00   0.0E+00
    5   66  1.618E+01  0.000E+00  0.000E+00  0.000E+00  2.444E+02  7.832E+00  0.000E+00   0.0E+00
    5   67  1.617E+01  0.000E+00  0.000E+00  0.000E+00  9.076E+05  2.946E+01  0.000E+00   0.0E+00
    5   68  1.560E+01  1.479E+08  5.396E-06  1.386E-06  0.000E+00  0.000E+00  6.605E+00   6.2E-01
    5   69  1.556E+01  8.373E+08  3.040E-05  7.788E-06  0.000E+00  0.000E+00  1.014E+03   1.2E+00
    5   70  1.555E+01  1.293E+09  6.562E-05  1.680E-05  0.000E+00  0.000E+00  1.250E+03   9.4E-01
    5   71  1.551E+01  9.938E+06  2.152E-07  5.495E-08  0.000E+00  0.000E+00  3.785E+01   2.4E+01
    5   72  1.526E+01  0.000E+00  0.000E+00  0.000E+00  3.083E+05  3.069E+00  0.000E+00   0.0E+00
    5   73  1.526E+01  0.000E+00  0.000E+00  0.000E+00  1.116E+06  1.759E+02  0.000E+00   0.0E+00
    5   74  1.525E+01  0.000E+00  0.000E+00  0.000E+00  5.152E+06  0.000E+00  0.000E+00   0.0E+00
    5   75  1.525E+01  0.000E+00  0.000E+00  0.000E+00  1.896E+06  5.103E+00  0.000E+00   0.0E+00
    5   76  1.324E+01  0.000E+00  0.000E+00  0.000E+00  1.228E+06  7.647E+01  0.000E+00   0.0E+00
    5   77  1.318E+01  0.000E+00  0.000E+00  0.000E+00  3.821E+04  0.000E+00  0.000E+00   0.0E+00
    5   78  1.290E+01  0.000E+00  0.000E+00  0.000E+00  0.000E+00  0.000E+00  9.341E+01   0.0E+00
    5   79  1.290E+01  2.116E+10  3.167E-04  6.726E-05  0.000E+00  0.000E+00  9.509E-01   7.5E-01
    5   80  1.281E+01  9.923E+10  2.443E-03  5.153E-04  0.000E+00  0.000E+00  1.934E+01   9.5E-01
    5   81  1.278E+01  7.506E+10  1.103E-03  2.321E-04  0.000E+00  0.000E+00  3.617E+01   1.1E+00
    5   82  1.276E+01  2.677E+11  3.919E-03  8.230E-04  0.000E+00  0.000E+00  1.052E+01   1.0E+00
    5   83  1.275E+01  1.103E+11  2.687E-03  5.640E-04  0.000E+00  0.000E+00  8.599E+00   1.1E+00
    5   84  1.261E+01  0.000E+00  0.000E+00  0.000E+00  1.855E+07  4.960E+03  0.000E+00   0.0E+00
    5   85  1.261E+01  0.000E+00  0.000E+00  0.000E+00  1.506E+06  4.939E+03  0.000E+00   0.0E+00
    5   86  1.256E+01  0.000E+00  0.000E+00  0.000E+00  2.724E+08  2.965E+05  0.000E+00   0.0E+00
    5   87  1.256E+01  0.000E+00  0.000E+00  0.000E+00  6.246E+08  5.785E+04  0.000E+00   0.0E+00
    5   88  1.255E+01  0.000E+00  0.000E+00  0.000E+00  4.670E+08  1.594E+05  0.000E+00   0.0E+00
    5   89  1.250E+01  0.000E+00  0.000E+00  0.000E+00  7.454E+08  0.000E+00  0.000E+00   0.0E+00
    5   90  1.244E+01  0.000E+00  0.000E+00  0.000E+00  3.642E+06  3.837E+01  0.000E+00   0.0E+00
    5   91  1.243E+01  0.000E+00  0.000E+00  0.000E+00  2.114E+06  1.032E+02  0.000E+00   0.0E+00
    5   92  1.241E+01  0.000E+00  0.000E+00  0.000E+00  1.187E+06  2.521E+03  0.000E+00   0.0E+00
    5   93  1.240E+01  0.000E+00  0.000E+00  0.000E+00  0.000E+00  0.000E+00  7.849E+04   0.0E+00
    5   94  1.239E+01  3.783E+11  5.223E-03  1.065E-03  0.000E+00  0.000E+00  1.002E+05   9.4E-01
    5   95  1.238E+01  2.537E+12  8.165E-02  1.664E-02  0.000E+00  0.000E+00  3.556E+04   9.9E-01
    5   96  1.238E+01  1.028E+12  2.362E-02  4.812E-03  0.000E+00  0.000E+00  1.207E+05   1.0E+00
    5   97  1.238E+01  0.000E+00  0.000E+00  0.000E+00  0.000E+00  0.000E+00  5.324E+05   0.0E+00
    5   98  1.237E+01  2.045E+11  4.692E-03  9.553E-04  0.000E+00  0.000E+00  6.553E+04   1.0E+00
    5   99  1.238E+01  0.000E+00  0.000E+00  0.000E+00  9.380E+05  6.118E+02  0.000E+00   0.0E+00
    5  100  1.236E+01  3.655E+09  1.172E-04  2.385E-05  0.000E+00  0.000E+00  2.942E+05   1.1E+00
    5  101  1.233E+01  5.278E+10  7.218E-04  1.465E-04  0.000E+00  0.000E+00  1.281E+04   8.7E-01
    5  102  1.229E+01  4.209E+07  9.534E-07  1.929E-07  0.000E+00  0.000E+00  2.860E+02   1.3E+00
    5  103  1.229E+01  8.695E+08  2.755E-05  5.571E-06  0.000E+00  0.000E+00  1.399E+02   1.1E+00
    5  104  1.228E+01  0.000E+00  0.000E+00  0.000E+00  5.933E+08  0.000E+00  0.000E+00   0.0E+00
    5  105  1.228E+01  0.000E+00  0.000E+00  0.000E+00  6.480E+07  1.733E+02  0.000E+00   0.0E+00
    5  107  1.227E+01  0.000E+00  0.000E+00  0.000E+00  1.518E+08  1.507E+01  0.000E+00   0.0E+00
    5  108  1.227E+01  0.000E+00  0.000E+00  0.000E+00  3.489E+08  1.322E+01  0.000E+00   0.0E+00
    5  109  1.227E+01  3.502E+07  1.107E-06  2.237E-07  0.000E+00  0.000E+00  6.255E+02   5.2E-01
    5  110  1.227E+01  0.000E+00  0.000E+00  0.000E+00  2.905E+07  3.853E+00  0.000E+00   0.0E+00
    5  111  1.227E+01  0.000E+00  0.000E+00  0.000E+00  0.000E+00  0.000E+00  3.863E+01   0.0E+00
    5  112  1.227E+01  0.000E+00  0.000E+00  0.000E+00  5.828E+05  3.119E+00  0.000E+00   0.0E+00
    5  113  1.227E+01  0.000E+00  0.000E+00  0.000E+00  3.611E+06  0.000E+00  0.000E+00   0.0E+00
    5  116  1.226E+01  0.000E+00  0.000E+00  0.000E+00  0.000E+00  0.000E+00  1.779E+01   0.0E+00
    5  118  1.221E+01  1.305E+09  4.085E-05  8.212E-06  0.000E+00  0.000E+00  2.721E+03   1.1E+00
    5  119  1.221E+01  0.000E+00  0.000E+00  0.000E+00  0.000E+00  0.000E+00  7.686E+02   0.0E+00
    5  120  1.220E+01  2.837E+08  6.332E-06  1.272E-06  0.000E+00  0.000E+00  5.055E+02   1.0E+00
    5  121  1.219E+01  4.215E+08  1.315E-05  2.639E-06  0.000E+00  0.000E+00  1.159E+02   1.0E+00
    5  122  1.181E+01  0.000E+00  0.000E+00  0.000E+00  0.000E+00  0.000E+00  8.012E+02   0.0E+00
    5  123  1.181E+01  7.091E+07  8.890E-07  1.728E-07  0.000E+00  0.000E+00  1.881E+02   3.5E+00
    5  124  1.167E+01  0.000E+00  0.000E+00  0.000E+00  1.548E+06  2.137E+03  0.000E+00   0.0E+00
    5  125  1.164E+01  0.000E+00  0.000E+00  0.000E+00  2.766E+06  0.000E+00  0.000E+00   0.0E+00
    5  126  1.163E+01  0.000E+00  0.000E+00  0.000E+00  4.546E+05  6.030E-02  0.000E+00   0.0E+00
    5  127  1.163E+01  0.000E+00  0.000E+00  0.000E+00  8.560E+04  3.927E+01  0.000E+00   0.0E+00
    5  128  1.148E+01  2.737E+08  5.407E-06  1.022E-06  0.000E+00  0.000E+00  2.323E+01   4.9E-01
    5  129  1.147E+01  3.433E+08  6.769E-06  1.278E-06  0.000E+00  0.000E+00  7.321E+02   1.0E+00
    5  130  1.147E+01  1.247E+09  3.441E-05  6.493E-06  0.000E+00  0.000E+00  1.501E+03   1.1E+00
    5  131  1.146E+01  3.693E+08  4.361E-06  8.226E-07  0.000E+00  0.000E+00  5.660E+00   3.0E-01
    5  132  1.139E+01  0.000E+00  0.000E+00  0.000E+00  1.620E+05  4.648E-01  0.000E+00   0.0E+00
    5  133  1.139E+01  0.000E+00  0.000E+00  0.000E+00  2.707E+04  6.088E+01  0.000E+00   0.0E+00
    5  134  1.138E+01  0.000E+00  0.000E+00  0.000E+00  5.808E+05  0.000E+00  0.000E+00   0.0E+00
    5  135  1.138E+01  0.000E+00  0.000E+00  0.000E+00  5.417E+05  2.701E+00  0.000E+00   0.0E+00
    5  136  1.137E+01  0.000E+00  0.000E+00  0.000E+00  0.000E+00  0.000E+00  5.882E+00   0.0E+00
    5  137  1.137E+01  3.699E+04  1.004E-09  1.880E-10  0.000E+00  0.000E+00  1.394E+01   7.6E+01
    5  139  1.137E+01  0.000E+00  0.000E+00  0.000E+00  0.000E+00  0.000E+00  3.190E-01   0.0E+00
    6    7  3.694E+04  0.000E+00  0.000E+00  0.000E+00  2.226E-09  0.000E+00  0.000E+00   0.0E+00
    6    9  6.548E+03  0.000E+00  0.000E+00  0.000E+00  0.000E+00  0.000E+00  1.007E-09   0.0E+00
    6   10  2.337E+03  0.000E+00  0.000E+00  0.000E+00  6.777E-02  6.917E-02  0.000E+00   0.0E+00
    6   12  2.079E+02  0.000E+00  0.000E+00  0.000E+00  7.774E+00  0.000E+00  0.000E+00   0.0E+00
    6   14  1.681E+02  0.000E+00  0.000E+00  0.000E+00  0.000E+00  0.000E+00  2.122E-01   0.0E+00
    6   15  1.597E+02  2.981E+09  1.140E-02  4.197E-02  0.000E+00  0.000E+00  4.426E-02   1.0E+00
    6   16  1.570E+02  1.181E+09  3.119E-03  1.129E-02  0.000E+00  0.000E+00  7.962E+00   1.0E+00
    6   17  1.566E+02  2.186E+10  1.033E-01  3.729E-01  0.000E+00  0.000E+00  9.488E+01   1.1E+00
    6   18  1.559E+02  0.000E+00  0.000E+00  0.000E+00  4.284E+03  0.000E+00  0.000E+00   0.0E+00
    6   19  1.530E+02  0.000E+00  0.000E+00  0.000E+00  1.212E+03  3.310E+06  0.000E+00   0.0E+00
    6   20  1.504E+02  2.971E+07  7.194E-05  2.493E-04  0.000E+00  0.000E+00  1.661E+01   9.9E-01
    6   22  1.438E+02  5.615E+09  1.741E-02  5.771E-02  0.000E+00  0.000E+00  9.178E+01   1.0E+00
    6   23  1.248E+02  0.000E+00  0.000E+00  0.000E+00  0.000E+00  0.000E+00  2.842E+00   0.0E+00
    6   24  7.964E+01  1.740E+06  1.182E-06  2.169E-06  0.000E+00  0.000E+00  4.288E-01   7.5E-01
    6   25  7.750E+01  5.063E+08  3.256E-04  5.815E-04  0.000E+00  0.000E+00  8.990E-01   8.1E-01
    6   26  7.667E+01  1.289E+08  1.136E-04  2.007E-04  0.000E+00  0.000E+00  4.186E-01   8.2E-01
    6   27  7.337E+01  0.000E+00  0.000E+00  0.000E+00  0.000E+00  0.000E+00  2.978E-01   0.0E+00
    6   28  6.025E+01  0.000E+00  0.000E+00  0.000E+00  1.362E+04  0.000E+00  0.000E+00   0.0E+00
    6   31  4.656E+01  0.000E+00  0.000E+00  0.000E+00  0.000E+00  0.000E+00  3.601E+01   0.0E+00
    6   32  4.354E+01  2.608E+11  5.294E-02  5.312E-02  0.000E+00  0.000E+00  5.412E+03   5.7E-01
    6   33  4.310E+01  0.000E+00  0.000E+00  0.000E+00  0.000E+00  0.000E+00  1.509E+04   0.0E+00
    6   34  3.458E+01  0.000E+00  0.000E+00  0.000E+00  7.671E+02  0.000E+00  0.000E+00   0.0E+00
    6   35  3.448E+01  0.000E+00  0.000E+00  0.000E+00  3.587E+03  3.821E+03  0.000E+00   0.0E+00
    6   36  3.421E+01  0.000E+00  0.000E+00  0.000E+00  6.490E+03  4.069E+00  0.000E+00   0.0E+00
    6   37  3.340E+01  0.000E+00  0.000E+00  0.000E+00  1.310E+02  5.281E+03  0.000E+00   0.0E+00
    6   38  1.945E+01  1.361E+12  5.514E-02  2.472E-02  0.000E+00  0.000E+00  1.701E+05   1.0E+00
    6   39  1.942E+01  0.000E+00  0.000E+00  0.000E+00  0.000E+00  0.000E+00  4.012E+05   0.0E+00
    6   40  1.874E+01  0.000E+00  0.000E+00  0.000E+00  1.942E+09  0.000E+00  0.000E+00   0.0E+00
    6   41  1.872E+01  0.000E+00  0.000E+00  0.000E+00  6.614E+08  7.825E+05  0.000E+00   0.0E+00
    6   42  1.852E+01  0.000E+00  0.000E+00  0.000E+00  5.759E+08  4.097E+04  0.000E+00   0.0E+00
    6   43  1.851E+01  0.000E+00  0.000E+00  0.000E+00  1.041E+08  0.000E+00  0.000E+00   0.0E+00
    6   44  1.847E+01  0.000E+00  0.000E+00  0.000E+00  6.848E+08  1.217E+04  0.000E+00   0.0E+00
    6   47  1.778E+01  0.000E+00  0.000E+00  0.000E+00  0.000E+00  0.000E+00  7.876E+03   0.0E+00
    6   48  1.775E+01  8.300E+11  3.918E-02  1.602E-02  0.000E+00  0.000E+00  1.209E+03   1.0E+00
    6   49  1.773E+01  3.809E+11  1.282E-02  5.238E-03  0.000E+00  0.000E+00  8.732E+04   9.9E-01
    6   50  1.772E+01  5.736E+12  3.473E-01  1.418E-01  0.000E+00  0.000E+00  1.871E+06   9.9E-01
    6   51  1.769E+01  3.799E+09  1.274E-04  5.194E-05  0.000E+00  0.000E+00  3.166E+05   8.9E-01
    6   52  1.766E+01  1.064E+12  4.976E-02  2.025E-02  0.000E+00  0.000E+00  1.189E+06   1.0E+00
    6   53  1.753E+01  0.000E+00  0.000E+00  0.000E+00  0.000E+00  0.000E+00  4.173E+04   0.0E+00
    6   54  1.734E+01  0.000E+00  0.000E+00  0.000E+00  3.414E+07  0.000E+00  0.000E+00   0.0E+00
    6   55  1.733E+01  0.000E+00  0.000E+00  0.000E+00  8.844E+08  1.627E+03  0.000E+00   0.0E+00
    6   56  1.732E+01  0.000E+00  0.000E+00  0.000E+00  2.841E+08  4.695E+02  0.000E+00   0.0E+00
    6   57  1.732E+01  0.000E+00  0.000E+00  0.000E+00  7.508E+09  0.000E+00  0.000E+00   0.0E+00
    6   58  1.730E+01  0.000E+00  0.000E+00  0.000E+00  1.068E+09  2.344E+02  0.000E+00   0.0E+00
    6   59  1.730E+01  0.000E+00  0.000E+00  0.000E+00  2.165E+07  1.821E+02  0.000E+00   0.0E+00
    6   60  1.729E+01  0.000E+00  0.000E+00  0.000E+00  1.439E+08  2.294E+02  0.000E+00   0.0E+00
    6   62  1.728E+01  0.000E+00  0.000E+00  0.000E+00  2.455E+09  1.059E+02  0.000E+00   0.0E+00
    6   63  1.729E+01  0.000E+00  0.000E+00  0.000E+00  0.000E+00  0.000E+00  1.291E+03   0.0E+00
    6   64  1.674E+01  0.000E+00  0.000E+00  0.000E+00  8.847E+04  0.000E+00  0.000E+00   0.0E+00
    6   66  1.656E+01  0.000E+00  0.000E+00  0.000E+00  6.596E+05  0.000E+00  0.000E+00   0.0E+00
    6   67  1.655E+01  0.000E+00  0.000E+00  0.000E+00  3.093E+03  3.476E-01  0.000E+00   0.0E+00
    6   68  1.595E+01  4.761E+06  1.297E-07  4.768E-08  0.000E+00  0.000E+00  1.351E+01   5.2E-01
    6   69  1.591E+01  1.256E+07  3.407E-07  1.249E-07  0.000E+00  0.000E+00  1.782E+01   8.1E+00
    6   70  1.590E+01  1.018E+08  3.857E-06  1.413E-06  0.000E+00  0.000E+00  2.734E+00   1.7E+00
    6   71  1.586E+01  0.000E+00  0.000E+00  0.000E+00  0.000E+00  0.000E+00  2.391E+02   0.0E+00
    6   72  1.560E+01  0.000E+00  0.000E+00  0.000E+00  3.014E+04  5.652E-02  0.000E+00   0.0E+00
    6   73  1.559E+01  0.000E+00  0.000E+00  0.000E+00  1.230E+04  7.917E-01  0.000E+00   0.0E+00
    6   74  1.558E+01  0.000E+00  0.000E+00  0.000E+00  2.596E+05  2.701E+01  0.000E+00   0.0E+00
    6   75  1.558E+01  0.000E+00  0.000E+00  0.000E+00  5.865E+04  1.755E+02  0.000E+00   0.0E+00
    6   76  1.350E+01  0.000E+00  0.000E+00  0.000E+00  3.234E+06  0.000E+00  0.000E+00   0.0E+00
    6   79  1.314E+01  0.000E+00  0.000E+00  0.000E+00  0.000E+00  0.000E+00  1.716E+04   0.0E+00
    6   80  1.305E+01  3.183E+11  5.806E-03  1.746E-03  0.000E+00  0.000E+00  8.759E+04   9.5E-01
    6   81  1.302E+01  0.000E+00  0.000E+00  0.000E+00  0.000E+00  0.000E+00  9.985E+04   0.0E+00
    6   82  1.299E+01  0.000E+00  0.000E+00  0.000E+00  0.000E+00  0.000E+00  2.914E+05   0.0E+00
    6   83  1.298E+01  3.135E+11  5.659E-03  1.693E-03  0.000E+00  0.000E+00  8.534E+04   1.1E+00
    6   84  1.284E+01  0.000E+00  0.000E+00  0.000E+00  1.027E+09  0.000E+00  0.000E+00   0.0E+00
    6   85  1.284E+01  0.000E+00  0.000E+00  0.000E+00  3.391E+08  5.786E+05  0.000E+00   0.0E+00
    6   86  1.279E+01  0.000E+00  0.000E+00  0.000E+00  3.248E+08  4.750E+04  0.000E+00   0.0E+00
    6   87  1.279E+01  0.000E+00  0.000E+00  0.000E+00  9.334E+07  0.000E+00  0.000E+00   0.0E+00
    6   88  1.278E+01  0.000E+00  0.000E+00  0.000E+00  3.571E+08  1.292E+04  0.000E+00   0.0E+00
    6   90  1.266E+01  0.000E+00  0.000E+00  0.000E+00  2.934E+05  0.000E+00  0.000E+00   0.0E+00
    6   91  1.265E+01  0.000E+00  0.000E+00  0.000E+00  2.470E+06  3.664E+03  0.000E+00   0.0E+00
    6   92  1.264E+01  0.000E+00  0.000E+00  0.000E+00  6.440E+06  4.703E+02  0.000E+00   0.0E+00
    6   94  1.261E+01  0.000E+00  0.000E+00  0.000E+00  0.000E+00  0.000E+00  7.581E+03   0.0E+00
    6   95  1.260E+01  4.283E+11  1.020E-02  2.962E-03  0.000E+00  0.000E+00  6.545E+02   1.0E+00
    6   96  1.260E+01  2.060E+11  3.501E-03  1.016E-03  0.000E+00  0.000E+00  7.001E+04   9.5E-01
    6   97  1.260E+01  3.015E+12  9.222E-02  2.677E-02  0.000E+00  0.000E+00  1.966E+06   9.9E-01
    6   98  1.259E+01  8.135E+09  1.381E-04  4.006E-05  0.000E+00  0.000E+00  3.667E+05   7.3E-01
    6   99  1.260E+01  0.000E+00  0.000E+00  0.000E+00  3.437E+05  1.210E+03  0.000E+00   0.0E+00
    6  100  1.258E+01  5.682E+11  1.348E-02  3.910E-03  0.000E+00  0.000E+00  1.236E+06   1.0E+00
    6  101  1.255E+01  0.000E+00  0.000E+00  0.000E+00  0.000E+00  0.000E+00  5.333E+04   0.0E+00
    6  102  1.251E+01  2.336E+06  3.915E-08  1.128E-08  0.000E+00  0.000E+00  2.539E+01   1.2E+00
    6  103  1.250E+01  1.641E+07  3.845E-07  1.108E-07  0.000E+00  0.000E+00  3.504E+01   1.4E+00
    6  104  1.250E+01  0.000E+00  0.000E+00  0.000E+00  7.343E+07  9.440E+02  0.000E+00   0.0E+00
    6  105  1.250E+01  0.000E+00  0.000E+00  0.000E+00  3.384E+06  0.000E+00  0.000E+00   0.0E+00
    6  106  1.249E+01  0.000E+00  0.000E+00  0.000E+00  6.086E+08  0.000E+00  0.000E+00   0.0E+00
    6  107  1.249E+01  0.000E+00  0.000E+00  0.000E+00  2.803E+07  1.735E+02  0.000E+00   0.0E+00
    6  108  1.249E+01  0.000E+00  0.000E+00  0.000E+00  6.360E+07  1.907E+02  0.000E+00   0.0E+00
    6  109  1.249E+01  4.557E+07  1.066E-06  3.068E-07  0.000E+00  0.000E+00  3.523E+02   1.2E+00
    6  110  1.249E+01  0.000E+00  0.000E+00  0.000E+00  2.574E+04  7.913E+01  0.000E+00   0.0E+00
    6  111  1.249E+01  5.078E+08  1.527E-05  4.394E-06  0.000E+00  0.000E+00  1.784E+03   1.2E+00
    6  112  1.249E+01  0.000E+00  0.000E+00  0.000E+00  3.846E+07  9.740E+01  0.000E+00   0.0E+00
    6  113  1.248E+01  0.000E+00  0.000E+00  0.000E+00  1.916E+08  5.044E+01  0.000E+00   0.0E+00
    6  114  1.248E+01  0.000E+00  0.000E+00  0.000E+00  0.000E+00  0.000E+00  6.469E-01   0.0E+00
    6  116  1.248E+01  2.507E+06  7.519E-08  2.162E-08  0.000E+00  0.000E+00  1.274E+01   1.2E+00
    6  117  1.247E+01  0.000E+00  0.000E+00  0.000E+00  0.000E+00  0.000E+00  2.404E+01   0.0E+00
    6  118  1.243E+01  2.854E+08  6.608E-06  1.892E-06  0.000E+00  0.000E+00  5.246E+02   1.0E+00
    6  119  1.242E+01  4.106E+09  1.221E-04  3.495E-05  0.000E+00  0.000E+00  1.098E+04   1.0E+00
    6  120  1.241E+01  1.456E+07  2.404E-07  6.878E-08  0.000E+00  0.000E+00  1.044E+01   1.0E+00
    6  121  1.241E+01  1.316E+08  3.037E-06  8.683E-07  0.000E+00  0.000E+00  5.293E+02   1.0E+00
    6  123  1.201E+01  0.000E+00  0.000E+00  0.000E+00  0.000E+00  0.000E+00  1.992E+02   0.0E+00
    6  124  1.187E+01  0.000E+00  0.000E+00  0.000E+00  1.552E+04  0.000E+00  0.000E+00   0.0E+00
    6  126  1.182E+01  0.000E+00  0.000E+00  0.000E+00  1.673E+06  0.000E+00  0.000E+00   0.0E+00
    6  127  1.182E+01  0.000E+00  0.000E+00  0.000E+00  3.575E+05  5.048E+01  0.000E+00   0.0E+00
    6  128  1.167E+01  1.503E+07  2.191E-07  5.891E-08  0.000E+00  0.000E+00  7.261E+00   6.1E-02
    6  129  1.166E+01  3.448E+08  5.018E-06  1.348E-06  0.000E+00  0.000E+00  3.811E+02   2.7E-02
    6  130  1.165E+01  1.328E+04  2.703E-10  7.260E-11  0.000E+00  0.000E+00  6.574E+01   2.7E+03
    6  131  1.165E+01  0.000E+00  0.000E+00  0.000E+00  0.000E+00  0.000E+00  5.047E+02   0.0E+00
    6  132  1.157E+01  0.000E+00  0.000E+00  0.000E+00  4.104E+03  6.714E-01  0.000E+00   0.0E+00
    6  133  1.157E+01  0.000E+00  0.000E+00  0.000E+00  8.832E+04  1.262E+00  0.000E+00   0.0E+00
    6  134  1.157E+01  0.000E+00  0.000E+00  0.000E+00  1.705E+03  1.335E+01  0.000E+00   0.0E+00
    6  135  1.157E+01  0.000E+00  0.000E+00  0.000E+00  3.737E+05  2.175E+01  0.000E+00   0.0E+00
    6  136  1.156E+01  2.535E+04  6.528E-10  1.739E-10  0.000E+00  0.000E+00  2.032E-01   4.3E+00
    6  137  1.156E+01  1.746E+05  3.497E-09  9.314E-10  0.000E+00  0.000E+00  2.865E+00   4.0E+00
    6  138  1.156E+01  0.000E+00  0.000E+00  0.000E+00  0.000E+00  0.000E+00  9.479E+00   0.0E+00
    6  139  1.156E+01  3.426E+06  8.817E-08  2.348E-08  0.000E+00  0.000E+00  2.397E+01   4.2E+00
    7    8  6.486E+04  3.192E-03  6.038E-09  1.289E-06  0.000E+00  0.000E+00  0.000E+00   8.4E+05
    7    9  7.958E+03  1.983E+02  1.882E-06  1.480E-04  0.000E+00  0.000E+00  1.963E-09   8.4E+01
    7   10  2.495E+03  0.000E+00  0.000E+00  0.000E+00  2.845E-02  2.634E+01  0.000E+00   0.0E+00
    7   11  5.089E+02  0.000E+00  0.000E+00  0.000E+00  0.000E+00  9.417E+03  0.000E+00   0.0E+00
    7   12  2.091E+02  0.000E+00  0.000E+00  0.000E+00  3.337E+01  3.161E+04  0.000E+00   0.0E+00
    7   13  1.757E+02  5.660E+08  8.731E-04  1.515E-03  0.000E+00  0.000E+00  0.000E+00   9.3E-01
    7   14  1.689E+02  6.824E+08  2.918E-03  4.867E-03  0.000E+00  0.000E+00  6.601E+00   9.4E-01
    7   15  1.604E+02  0.000E+00  0.000E+00  0.000E+00  0.000E+00  0.000E+00  5.927E-03   0.0E+00
    7   16  1.577E+02  6.098E+08  3.790E-03  5.903E-03  0.000E+00  0.000E+00  1.213E-01   1.1E+00
    7   18  1.565E+02  0.000E+00  0.000E+00  0.000E+00  1.377E+02  1.874E+06  0.000E+00   0.0E+00
    7   19  1.536E+02  0.000E+00  0.000E+00  0.000E+00  2.507E+02  2.367E+05  0.000E+00   0.0E+00
    7   20  1.510E+02  1.742E+10  9.921E-02  1.479E-01  0.000E+00  0.000E+00  2.104E-04   1.0E+00
    7   21  1.486E+02  0.000E+00  0.000E+00  0.000E+00  0.000E+00  2.199E+05  0.000E+00   0.0E+00
    7   22  1.444E+02  0.000E+00  0.000E+00  0.000E+00  0.000E+00  0.000E+00  8.466E+01   0.0E+00
    7   23  1.252E+02  1.757E+10  4.130E-02  5.108E-02  0.000E+00  0.000E+00  1.450E+02   7.7E-01
    7   24  7.982E+01  1.288E+06  2.050E-06  1.616E-06  0.000E+00  0.000E+00  2.304E-01   1.1E-02
    7   25  7.766E+01  6.358E+06  9.581E-06  7.348E-06  0.000E+00  0.000E+00  1.307E+01   2.7E-01
    7   26  7.682E+01  0.000E+00  0.000E+00  0.000E+00  0.000E+00  0.000E+00  1.248E-01   0.0E+00
    7   27  7.352E+01  1.935E+09  1.568E-03  1.139E-03  0.000E+00  0.000E+00  8.018E+01   2.7E-01
    7   28  6.035E+01  0.000E+00  0.000E+00  0.000E+00  2.011E+03  1.385E+04  0.000E+00   0.0E+00
    7   29  5.706E+01  0.000E+00  0.000E+00  0.000E+00  0.000E+00  1.124E+03  0.000E+00   0.0E+00
    7   30  4.682E+01  2.748E+10  3.011E-03  1.393E-03  0.000E+00  0.000E+00  0.000E+00   5.9E-01
    7   31  4.662E+01  4.805E+08  1.566E-04  7.209E-05  0.000E+00  0.000E+00  4.327E+02   9.4E-01
    7   32  4.360E+01  1.314E+10  6.240E-03  2.687E-03  0.000E+00  0.000E+00  5.566E+03   6.0E-01
    7   33  4.315E+01  1.330E+11  3.713E-02  1.582E-02  0.000E+00  0.000E+00  7.340E+02   6.0E-01
    7   34  3.462E+01  0.000E+00  0.000E+00  0.000E+00  1.093E+05  6.724E+02  0.000E+00   0.0E+00
    7   35  3.451E+01  0.000E+00  0.000E+00  0.000E+00  1.328E+05  6.088E+01  0.000E+00   0.0E+00
    7   36  3.424E+01  0.000E+00  0.000E+00  0.000E+00  2.922E+05  0.000E+00  0.000E+00   0.0E+00
    7   37  3.344E+01  0.000E+00  0.000E+00  0.000E+00  2.663E+05  4.216E+02  0.000E+00   0.0E+00
    7   38  1.946E+01  2.262E+10  2.141E-03  4.115E-04  0.000E+00  0.000E+00  1.492E+05   1.1E+00
    7   39  1.943E+01  8.845E+11  5.004E-02  9.600E-03  0.000E+00  0.000E+00  3.614E+04   1.0E+00
    7   40  1.875E+01  0.000E+00  0.000E+00  0.000E+00  3.949E+07  4.991E+05  0.000E+00   0.0E+00
    7   41  1.873E+01  0.000E+00  0.000E+00  0.000E+00  6.272E+08  5.115E+04  0.000E+00   0.0E+00
    7   42  1.853E+01  0.000E+00  0.000E+00  0.000E+00  2.715E+07  0.000E+00  0.000E+00   0.0E+00
    7   43  1.852E+01  0.000E+00  0.000E+00  0.000E+00  5.417E+08  1.063E+04  0.000E+00   0.0E+00
    7   44  1.848E+01  0.000E+00  0.000E+00  0.000E+00  4.209E+08  6.380E+02  0.000E+00   0.0E+00
    7   45  1.826E+01  0.000E+00  0.000E+00  0.000E+00  0.000E+00  1.040E+05  0.000E+00   0.0E+00
    7   46  1.781E+01  1.905E+11  3.021E-03  5.314E-04  0.000E+00  0.000E+00  0.000E+00   1.0E+00
    7   47  1.778E+01  2.170E+11  1.029E-02  1.807E-03  0.000E+00  0.000E+00  1.786E+05   1.0E+00
    7   48  1.775E+01  0.000E+00  0.000E+00  0.000E+00  0.000E+00  0.000E+00  1.600E+02   0.0E+00
    7   49  1.774E+01  3.230E+09  2.539E-04  4.448E-05  0.000E+00  0.000E+00  1.400E+03   1.0E+00
    7   51  1.770E+01  4.183E+12  3.275E-01  5.727E-02  0.000E+00  0.000E+00  9.451E+00   1.0E+00
    7   52  1.767E+01  0.000E+00  0.000E+00  0.000E+00  0.000E+00  0.000E+00  1.094E+06   0.0E+00
    7   53  1.754E+01  2.107E+12  9.721E-02  1.684E-02  0.000E+00  0.000E+00  9.544E+05   1.0E+00
    7   54  1.735E+01  0.000E+00  0.000E+00  0.000E+00  2.015E+08  6.333E+02  0.000E+00   0.0E+00
    7   56  1.733E+01  0.000E+00  0.000E+00  0.000E+00  7.320E+08  6.195E+02  0.000E+00   0.0E+00
    7   58  1.731E+01  0.000E+00  0.000E+00  0.000E+00  2.709E+08  0.000E+00  0.000E+00   0.0E+00
    7   59  1.731E+01  0.000E+00  0.000E+00  0.000E+00  2.790E+09  2.935E+02  0.000E+00   0.0E+00
    7   60  1.730E+01  0.000E+00  0.000E+00  0.000E+00  4.621E+09  0.000E+00  0.000E+00   0.0E+00
    7   61  1.732E+01  2.548E+08  3.819E-06  6.532E-07  0.000E+00  0.000E+00  0.000E+00   8.2E-01
    7   63  1.730E+01  2.424E+10  1.088E-03  1.858E-04  0.000E+00  0.000E+00  1.444E+04   1.1E+00
    7   64  1.675E+01  0.000E+00  0.000E+00  0.000E+00  2.127E+06  3.167E+00  0.000E+00   0.0E+00
    7   65  1.660E+01  0.000E+00  0.000E+00  0.000E+00  0.000E+00  4.059E+03  0.000E+00   0.0E+00
    7   66  1.657E+01  0.000E+00  0.000E+00  0.000E+00  1.447E+05  4.029E+02  0.000E+00   0.0E+00
    7   67  1.656E+01  0.000E+00  0.000E+00  0.000E+00  4.976E+06  9.538E+02  0.000E+00   0.0E+00
    7   68  1.596E+01  4.510E+09  2.870E-04  4.523E-05  0.000E+00  0.000E+00  9.113E+01   9.6E-01
    7   69  1.592E+01  4.861E+09  3.078E-04  4.839E-05  0.000E+00  0.000E+00  6.200E+03   9.7E-01
    7   70  1.591E+01  0.000E+00  0.000E+00  0.000E+00  0.000E+00  0.000E+00  9.666E+00   0.0E+00
    7   71  1.587E+01  1.429E+09  5.394E-05  8.453E-06  0.000E+00  0.000E+00  1.072E+03   8.1E-02
    7   72  1.561E+01  0.000E+00  0.000E+00  0.000E+00  7.366E+06  0.000E+00  0.000E+00   0.0E+00
    7   73  1.560E+01  0.000E+00  0.000E+00  0.000E+00  1.862E+07  4.276E+01  0.000E+00   0.0E+00
    7   75  1.559E+01  0.000E+00  0.000E+00  0.000E+00  1.040E+07  0.000E+00  0.000E+00   0.0E+00
    7   76  1.350E+01  0.000E+00  0.000E+00  0.000E+00  1.580E+05  1.174E+03  0.000E+00   0.0E+00
    7   77  1.344E+01  0.000E+00  0.000E+00  0.000E+00  0.000E+00  1.794E+02  0.000E+00   0.0E+00
    7   78  1.315E+01  3.045E+09  2.630E-05  3.415E-06  0.000E+00  0.000E+00  0.000E+00   1.7E+00
    7   79  1.315E+01  3.404E+10  8.817E-04  1.145E-04  0.000E+00  0.000E+00  7.172E+02   1.0E+00
    7   80  1.306E+01  1.280E+10  5.452E-04  7.030E-05  0.000E+00  0.000E+00  7.960E+04   1.2E+00
    7   81  1.302E+01  6.371E+10  1.620E-03  2.084E-04  0.000E+00  0.000E+00  1.685E+04   1.1E+00
    7   82  1.300E+01  3.265E+11  8.269E-03  1.062E-03  0.000E+00  0.000E+00  2.078E+04   1.0E+00
    7   83  1.299E+01  9.081E+08  3.828E-05  4.911E-06  0.000E+00  0.000E+00  7.170E+04   9.2E-01
    7   84  1.284E+01  0.000E+00  0.000E+00  0.000E+00  2.496E+07  3.625E+05  0.000E+00   0.0E+00
    7   85  1.284E+01  0.000E+00  0.000E+00  0.000E+00  3.549E+08  3.470E+04  0.000E+00   0.0E+00
    7   86  1.280E+01  0.000E+00  0.000E+00  0.000E+00  1.750E+07  0.000E+00  0.000E+00   0.0E+00
    7   87  1.279E+01  0.000E+00  0.000E+00  0.000E+00  2.998E+08  1.467E+04  0.000E+00   0.0E+00
    7   88  1.278E+01  0.000E+00  0.000E+00  0.000E+00  2.258E+08  2.931E+03  0.000E+00   0.0E+00
    7   89  1.273E+01  0.000E+00  0.000E+00  0.000E+00  0.000E+00  1.209E+05  0.000E+00   0.0E+00
    7   90  1.267E+01  0.000E+00  0.000E+00  0.000E+00  2.758E+06  5.445E+02  0.000E+00   0.0E+00
    7   91  1.266E+01  0.000E+00  0.000E+00  0.000E+00  3.444E+05  3.472E+02  0.000E+00   0.0E+00
    7   92  1.264E+01  0.000E+00  0.000E+00  0.000E+00  1.573E+06  0.000E+00  0.000E+00   0.0E+00
    7   93  1.262E+01  9.070E+10  7.219E-04  8.998E-05  0.000E+00  0.000E+00  0.000E+00   1.1E+00
    7   94  1.261E+01  1.008E+11  2.404E-03  2.995E-04  0.000E+00  0.000E+00  1.710E+05   9.7E-01
    7   95  1.261E+01  0.000E+00  0.000E+00  0.000E+00  0.000E+00  0.000E+00  3.770E+02   0.0E+00
    7   96  1.260E+01  5.930E+09  2.353E-04  2.929E-05  0.000E+00  0.000E+00  1.155E+03   9.4E-01
    7   98  1.259E+01  2.208E+12  8.752E-02  1.089E-02  0.000E+00  0.000E+00  7.561E+00   9.9E-01
    7   99  1.260E+01  0.000E+00  0.000E+00  0.000E+00  5.208E+03  1.057E+01  0.000E+00   0.0E+00
    7  100  1.259E+01  0.000E+00  0.000E+00  0.000E+00  0.000E+00  0.000E+00  1.158E+06   0.0E+00
    7  101  1.255E+01  1.193E+12  2.819E-02  3.495E-03  0.000E+00  0.000E+00  1.070E+06   1.0E+00
    7  102  1.251E+01  6.061E+07  2.371E-06  2.931E-07  0.000E+00  0.000E+00  1.181E+02   1.3E+00
    7  103  1.251E+01  0.000E+00  0.000E+00  0.000E+00  0.000E+00  0.000E+00  3.352E+02   0.0E+00
    7  105  1.250E+01  0.000E+00  0.000E+00  0.000E+00  1.753E+07  3.329E+02  0.000E+00   0.0E+00
    7  107  1.250E+01  0.000E+00  0.000E+00  0.000E+00  1.566E+07  5.214E+02  0.000E+00   0.0E+00
    7  108  1.249E+01  0.000E+00  0.000E+00  0.000E+00  9.850E+07  0.000E+00  0.000E+00   0.0E+00
    7  109  1.249E+01  0.000E+00  0.000E+00  0.000E+00  0.000E+00  0.000E+00  3.808E+02   0.0E+00
    7  110  1.249E+01  0.000E+00  0.000E+00  0.000E+00  2.864E+08  5.891E+01  0.000E+00   0.0E+00
    7  112  1.249E+01  0.000E+00  0.000E+00  0.000E+00  3.153E+08  0.000E+00  0.000E+00   0.0E+00
    7  118  1.243E+01  0.000E+00  0.000E+00  0.000E+00  0.000E+00  0.000E+00  3.538E+02   0.0E+00
    7  120  1.242E+01  4.207E+08  1.621E-05  1.989E-06  0.000E+00  0.000E+00  2.470E+02   1.0E+00
    7  121  1.241E+01  0.000E+00  0.000E+00  0.000E+00  0.000E+00  0.000E+00  1.268E+02   0.0E+00
    7  122  1.201E+01  2.182E+08  1.574E-06  1.867E-07  0.000E+00  0.000E+00  0.000E+00   9.7E-01
    7  123  1.201E+01  3.891E+08  8.414E-06  9.981E-07  0.000E+00  0.000E+00  8.588E+00   1.2E+00
    7  124  1.187E+01  0.000E+00  0.000E+00  0.000E+00  9.020E+05  5.844E+01  0.000E+00   0.0E+00
    7  125  1.184E+01  0.000E+00  0.000E+00  0.000E+00  0.000E+00  2.043E+03  0.000E+00   0.0E+00
    7  126  1.183E+01  0.000E+00  0.000E+00  0.000E+00  1.605E+05  2.810E+01  0.000E+00   0.0E+00
    7  127  1.182E+01  0.000E+00  0.000E+00  0.000E+00  2.394E+06  6.114E+02  0.000E+00   0.0E+00
    7  128  1.167E+01  3.507E+09  1.194E-04  1.376E-05  0.000E+00  0.000E+00  8.512E+01   9.9E-01
    7  129  1.166E+01  3.913E+09  1.329E-04  1.531E-05  0.000E+00  0.000E+00  6.192E+03   1.0E+00
    7  130  1.166E+01  0.000E+00  0.000E+00  0.000E+00  0.000E+00  0.000E+00  3.357E+01   0.0E+00
    7  131  1.165E+01  3.772E+09  7.676E-05  8.831E-06  0.000E+00  0.000E+00  6.188E+00   4.6E-01
    7  132  1.158E+01  0.000E+00  0.000E+00  0.000E+00  9.207E+05  0.000E+00  0.000E+00   0.0E+00
    7  133  1.157E+01  0.000E+00  0.000E+00  0.000E+00  2.338E+06  1.669E+01  0.000E+00   0.0E+00
    7  135  1.157E+01  0.000E+00  0.000E+00  0.000E+00  1.392E+06  0.000E+00  0.000E+00   0.0E+00
    7  137  1.156E+01  0.000E+00  0.000E+00  0.000E+00  0.000E+00  0.000E+00  1.761E+00   0.0E+00
    8    9  7.089E+03  0.000E+00  0.000E+00  0.000E+00  0.000E+00  3.240E+01  0.000E+00   0.0E+00
    8   10  2.403E+03  0.000E+00  0.000E+00  0.000E+00  0.000E+00  0.000E+00  1.190E-09   0.0E+00
    8   12  2.084E+02  3.491E+09  6.820E-02  4.679E-02  0.000E+00  0.000E+00  0.000E+00   1.0E+00
    8   14  1.684E+02  0.000E+00  0.000E+00  0.000E+00  0.000E+00  4.331E+01  0.000E+00   0.0E+00
    8   16  1.573E+02  0.000E+00  0.000E+00  0.000E+00  1.900E+02  0.000E+00  0.000E+00   0.0E+00
    8   18  1.562E+02  1.652E+10  1.811E-01  9.312E-02  0.000E+00  0.000E+00  0.000E+00   1.0E+00
    8   19  1.533E+02  0.000E+00  0.000E+00  0.000E+00  0.000E+00  0.000E+00  5.226E+01   0.0E+00
    8   20  1.506E+02  0.000E+00  0.000E+00  0.000E+00  4.647E-01  0.000E+00  0.000E+00   0.0E+00
    8   23  1.250E+02  0.000E+00  0.000E+00  0.000E+00  0.000E+00  8.672E+02  0.000E+00   0.0E+00
    8   24  7.972E+01  0.000E+00  0.000E+00  0.000E+00  5.538E+05  0.000E+00  0.000E+00   0.0E+00
    8   25  7.757E+01  0.000E+00  0.000E+00  0.000E+00  9.496E+05  0.000E+00  0.000E+00   0.0E+00
    8   27  7.343E+01  0.000E+00  0.000E+00  0.000E+00  0.000E+00  5.162E+03  0.000E+00   0.0E+00
    8   28  6.029E+01  2.615E+10  4.276E-02  8.488E-03  0.000E+00  0.000E+00  0.000E+00   5.1E-01
    8   31  4.659E+01  0.000E+00  0.000E+00  0.000E+00  0.000E+00  2.006E+03  0.000E+00   0.0E+00
    8   32  4.356E+01  0.000E+00  0.000E+00  0.000E+00  9.788E+01  0.000E+00  0.000E+00   0.0E+00
    8   33  4.312E+01  0.000E+00  0.000E+00  0.000E+00  0.000E+00  1.698E+02  0.000E+00   0.0E+00
    8   34  3.460E+01  1.120E+07  6.031E-06  6.869E-07  0.000E+00  0.000E+00  0.000E+00   1.3E+00
    8   35  3.449E+01  0.000E+00  0.000E+00  0.000E+00  0.000E+00  0.000E+00  5.076E+00   0.0E+00
    8   37  3.342E+01  0.000E+00  0.000E+00  0.000E+00  0.000E+00  0.000E+00  2.731E-02   0.0E+00
    8   38  1.946E+01  0.000E+00  0.000E+00  0.000E+00  1.096E+05  0.000E+00  0.000E+00   0.0E+00
    8   39  1.942E+01  0.000E+00  0.000E+00  0.000E+00  0.000E+00  3.813E+01  0.000E+00   0.0E+00
    8   40  1.875E+01  2.050E+09  3.241E-04  2.000E-05  0.000E+00  0.000E+00  0.000E+00   6.7E-01
    8   41  1.872E+01  0.000E+00  0.000E+00  0.000E+00  0.000E+00  0.000E+00  2.313E+01   0.0E+00
    8   43  1.852E+01  2.036E+07  3.140E-06  1.914E-07  0.000E+00  0.000E+00  0.000E+00   1.0E+00
    8   44  1.847E+01  0.000E+00  0.000E+00  0.000E+00  0.000E+00  0.000E+00  6.230E-01   0.0E+00
    8   47  1.778E+01  0.000E+00  0.000E+00  0.000E+00  0.000E+00  3.372E+00  0.000E+00   0.0E+00
    8   49  1.773E+01  0.000E+00  0.000E+00  0.000E+00  2.992E+06  0.000E+00  0.000E+00   0.0E+00
    8   51  1.770E+01  0.000E+00  0.000E+00  0.000E+00  3.784E+04  0.000E+00  0.000E+00   0.0E+00
    8   53  1.754E+01  0.000E+00  0.000E+00  0.000E+00  0.000E+00  1.062E+03  0.000E+00   0.0E+00
    8   54  1.734E+01  2.103E+09  2.845E-04  1.624E-05  0.000E+00  0.000E+00  0.000E+00   9.8E-01
    8   56  1.733E+01  0.000E+00  0.000E+00  0.000E+00  0.000E+00  0.000E+00  6.263E+01   0.0E+00
    8   59  1.730E+01  0.000E+00  0.000E+00  0.000E+00  0.000E+00  0.000E+00  5.816E+02   0.0E+00
    8   63  1.729E+01  0.000E+00  0.000E+00  0.000E+00  0.000E+00  8.375E+03  0.000E+00   0.0E+00
    8   64  1.674E+01  8.849E+11  1.116E-01  6.150E-03  0.000E+00  0.000E+00  0.000E+00   1.0E+00
    8   66  1.656E+01  1.548E+12  1.910E-01  1.041E-02  0.000E+00  0.000E+00  0.000E+00   1.0E+00
    8   67  1.655E+01  0.000E+00  0.000E+00  0.000E+00  0.000E+00  0.000E+00  3.696E+05   0.0E+00
    8   68  1.595E+01  0.000E+00  0.000E+00  0.000E+00  1.880E+09  0.000E+00  0.000E+00   0.0E+00
    8   69  1.591E+01  0.000E+00  0.000E+00  0.000E+00  2.786E+09  0.000E+00  0.000E+00   0.0E+00
    8   71  1.586E+01  0.000E+00  0.000E+00  0.000E+00  0.000E+00  7.080E+01  0.000E+00   0.0E+00
    8   73  1.560E+01  0.000E+00  0.000E+00  0.000E+00  0.000E+00  0.000E+00  2.765E+00   0.0E+00
    8   76  1.350E+01  2.751E+08  2.255E-05  1.002E-06  0.000E+00  0.000E+00  0.000E+00   7.3E-01
    8   79  1.314E+01  0.000E+00  0.000E+00  0.000E+00  0.000E+00  1.056E+02  0.000E+00   0.0E+00
    8   80  1.305E+01  0.000E+00  0.000E+00  0.000E+00  2.078E+05  0.000E+00  0.000E+00   0.0E+00
    8   81  1.302E+01  0.000E+00  0.000E+00  0.000E+00  0.000E+00  4.410E+02  0.000E+00   0.0E+00
    8   82  1.299E+01  0.000E+00  0.000E+00  0.000E+00  0.000E+00  7.580E+01  0.000E+00   0.0E+00
    8   83  1.299E+01  0.000E+00  0.000E+00  0.000E+00  4.443E+03  0.000E+00  0.000E+00   0.0E+00
    8   84  1.284E+01  4.714E+08  3.496E-05  1.478E-06  0.000E+00  0.000E+00  0.000E+00   2.6E-01
    8   85  1.284E+01  0.000E+00  0.000E+00  0.000E+00  0.000E+00  0.000E+00  4.938E-01   0.0E+00
    8   87  1.279E+01  6.532E+06  4.804E-07  2.022E-08  0.000E+00  0.000E+00  0.000E+00   3.0E+00
    8   88  1.278E+01  0.000E+00  0.000E+00  0.000E+00  0.000E+00  0.000E+00  2.803E+00   0.0E+00
    8   90  1.266E+01  4.526E+09  3.265E-04  1.361E-05  0.000E+00  0.000E+00  0.000E+00   1.2E+00
    8   91  1.266E+01  0.000E+00  0.000E+00  0.000E+00  0.000E+00  0.000E+00  3.649E+01   0.0E+00
    8   94  1.261E+01  0.000E+00  0.000E+00  0.000E+00  0.000E+00  3.052E-02  0.000E+00   0.0E+00
    8   96  1.260E+01  0.000E+00  0.000E+00  0.000E+00  1.836E+05  0.000E+00  0.000E+00   0.0E+00
    8   98  1.259E+01  0.000E+00  0.000E+00  0.000E+00  2.956E+03  0.000E+00  0.000E+00   0.0E+00
    8   99  1.260E+01  0.000E+00  0.000E+00  0.000E+00  0.000E+00  0.000E+00  9.400E+02   0.0E+00
    8  101  1.255E+01  0.000E+00  0.000E+00  0.000E+00  0.000E+00  2.250E+02  0.000E+00   0.0E+00
    8  102  1.251E+01  0.000E+00  0.000E+00  0.000E+00  9.176E+06  0.000E+00  0.000E+00   0.0E+00
    8  105  1.250E+01  2.437E+09  1.712E-04  7.042E-06  0.000E+00  0.000E+00  0.000E+00   9.9E-01
    8  107  1.249E+01  0.000E+00  0.000E+00  0.000E+00  0.000E+00  0.000E+00  4.775E+01   0.0E+00
    8  110  1.249E+01  0.000E+00  0.000E+00  0.000E+00  0.000E+00  0.000E+00  5.229E+02   0.0E+00
    8  120  1.242E+01  0.000E+00  0.000E+00  0.000E+00  6.622E+06  0.000E+00  0.000E+00   0.0E+00
    8  123  1.201E+01  0.000E+00  0.000E+00  0.000E+00  0.000E+00  1.161E+04  0.000E+00   0.0E+00
    8  124  1.187E+01  4.888E+11  3.098E-02  1.211E-03  0.000E+00  0.000E+00  0.000E+00   1.0E+00
    8  126  1.182E+01  8.822E+11  5.548E-02  2.160E-03  0.000E+00  0.000E+00  0.000E+00   1.0E+00
    8  127  1.182E+01  0.000E+00  0.000E+00  0.000E+00  0.000E+00  0.000E+00  4.113E+05   0.0E+00
    8  128  1.167E+01  0.000E+00  0.000E+00  0.000E+00  8.345E+08  0.000E+00  0.000E+00   0.0E+00
    8  129  1.166E+01  0.000E+00  0.000E+00  0.000E+00  1.248E+09  0.000E+00  0.000E+00   0.0E+00
    8  131  1.165E+01  0.000E+00  0.000E+00  0.000E+00  0.000E+00  2.986E+02  0.000E+00   0.0E+00
    8  133  1.157E+01  0.000E+00  0.000E+00  0.000E+00  0.000E+00  0.000E+00  1.845E+00   0.0E+00
    9   10  3.635E+03  1.458E+03  4.813E-06  1.728E-04  0.000E+00  0.000E+00  1.225E-12   1.8E+02
    9   11  5.437E+02  3.972E+07  5.868E-04  3.151E-03  0.000E+00  0.000E+00  0.000E+00   2.2E+00
    9   12  2.147E+02  6.223E+09  4.302E-02  9.122E-02  0.000E+00  0.000E+00  4.610E-04   1.1E+00
    9   13  1.797E+02  0.000E+00  0.000E+00  0.000E+00  0.000E+00  6.148E+01  0.000E+00   0.0E+00
    9   14  1.725E+02  0.000E+00  0.000E+00  0.000E+00  1.105E+02  1.662E+02  0.000E+00   0.0E+00
    9   15  1.637E+02  0.000E+00  0.000E+00  0.000E+00  2.408E+00  0.000E+00  0.000E+00   0.0E+00
    9   16  1.609E+02  0.000E+00  0.000E+00  0.000E+00  7.589E+01  3.938E+01  0.000E+00   0.0E+00
    9   18  1.597E+02  7.402E+09  2.829E-02  4.462E-02  0.000E+00  0.000E+00  1.045E+02   1.1E+00
    9   19  1.566E+02  2.522E+10  1.546E-01  2.392E-01  0.000E+00  0.000E+00  7.014E+01   1.0E+00
    9   20  1.539E+02  0.000E+00  0.000E+00  0.000E+00  7.243E+01  1.513E+02  0.000E+00   0.0E+00
    9   21  1.514E+02  2.789E+10  3.196E-02  4.781E-02  0.000E+00  0.000E+00  0.000E+00   8.8E-01
    9   22  1.470E+02  0.000E+00  0.000E+00  0.000E+00  1.208E+02  0.000E+00  0.000E+00   0.0E+00
    9   23  1.272E+02  0.000E+00  0.000E+00  0.000E+00  1.315E+03  6.395E+02  0.000E+00   0.0E+00
    9   24  8.062E+01  0.000E+00  0.000E+00  0.000E+00  7.680E+05  2.872E-01  0.000E+00   0.0E+00
    9   25  7.842E+01  0.000E+00  0.000E+00  0.000E+00  6.064E+05  6.459E+03  0.000E+00   0.0E+00
    9   26  7.757E+01  0.000E+00  0.000E+00  0.000E+00  1.594E+06  0.000E+00  0.000E+00   0.0E+00
    9   27  7.420E+01  0.000E+00  0.000E+00  0.000E+00  2.042E+06  8.345E+02  0.000E+00   0.0E+00
    9   28  6.081E+01  4.697E+10  2.604E-02  1.564E-02  0.000E+00  0.000E+00  5.806E+01   5.0E-01
    9   29  5.747E+01  5.529E+10  9.124E-03  5.178E-03  0.000E+00  0.000E+00  0.000E+00   4.4E-01
    9   30  4.710E+01  0.000E+00  0.000E+00  0.000E+00  0.000E+00  1.173E+03  0.000E+00   0.0E+00
    9   31  4.690E+01  0.000E+00  0.000E+00  0.000E+00  1.290E+04  4.999E+02  0.000E+00   0.0E+00
    9   32  4.383E+01  0.000E+00  0.000E+00  0.000E+00  2.825E+02  6.948E+03  0.000E+00   0.0E+00
    9   33  4.339E+01  0.000E+00  0.000E+00  0.000E+00  1.213E+04  3.859E+01  0.000E+00   0.0E+00
    9   34  3.477E+01  1.087E+07  1.971E-06  6.767E-07  0.000E+00  0.000E+00  3.193E+01   1.1E+00
    9   35  3.466E+01  1.908E+07  5.727E-06  1.960E-06  0.000E+00  0.000E+00  1.671E+00   6.7E-01
    9   36  3.439E+01  0.000E+00  0.000E+00  0.000E+00  0.000E+00  0.000E+00  1.194E+01   0.0E+00
    9   37  3.358E+01  6.140E+08  1.730E-04  5.736E-05  0.000E+00  0.000E+00  1.824E+01   6.3E-01
    9   38  1.951E+01  0.000E+00  0.000E+00  0.000E+00  1.596E+05  3.825E+02  0.000E+00   0.0E+00
    9   39  1.947E+01  0.000E+00  0.000E+00  0.000E+00  1.599E+06  4.593E-01  0.000E+00   0.0E+00
    9   40  1.880E+01  2.268E+09  1.201E-04  2.230E-05  0.000E+00  0.000E+00  1.244E+03   6.9E-01
    9   41  1.877E+01  2.408E+08  2.121E-05  3.933E-06  0.000E+00  0.000E+00  1.125E+02   1.2E+00
    9   42  1.857E+01  0.000E+00  0.000E+00  0.000E+00  0.000E+00  0.000E+00  7.378E+02   0.0E+00
    9   43  1.857E+01  1.315E+07  6.793E-07  1.245E-07  0.000E+00  0.000E+00  1.548E+03   1.2E-02
    9   44  1.852E+01  2.548E+09  2.184E-04  3.994E-05  0.000E+00  0.000E+00  7.230E+01   7.6E-01
    9   45  1.830E+01  1.025E+10  1.715E-04  3.101E-05  0.000E+00  0.000E+00  0.000E+00   8.7E-01
    9   46  1.785E+01  0.000E+00  0.000E+00  0.000E+00  0.000E+00  7.881E+01  0.000E+00   0.0E+00
    9   47  1.782E+01  0.000E+00  0.000E+00  0.000E+00  2.640E+06  1.023E+02  0.000E+00   0.0E+00
    9   48  1.779E+01  0.000E+00  0.000E+00  0.000E+00  4.265E+05  0.000E+00  0.000E+00   0.0E+00
    9   49  1.778E+01  0.000E+00  0.000E+00  0.000E+00  1.103E+06  2.248E+01  0.000E+00   0.0E+00
    9   51  1.774E+01  0.000E+00  0.000E+00  0.000E+00  1.211E+04  5.020E+00  0.000E+00   0.0E+00
    9   52  1.771E+01  0.000E+00  0.000E+00  0.000E+00  4.080E+06  0.000E+00  0.000E+00   0.0E+00
    9   53  1.758E+01  0.000E+00  0.000E+00  0.000E+00  1.122E+06  1.242E+03  0.000E+00   0.0E+00
    9   54  1.739E+01  8.201E+08  3.716E-05  6.380E-06  0.000E+00  0.000E+00  7.860E+01   9.9E-01
    9   56  1.737E+01  4.844E+09  3.651E-04  6.263E-05  0.000E+00  0.000E+00  2.940E+03   9.9E-01
    9   58  1.735E+01  0.000E+00  0.000E+00  0.000E+00  0.000E+00  0.000E+00  5.006E+02   0.0E+00
    9   59  1.734E+01  1.378E+10  1.036E-03  1.774E-04  0.000E+00  0.000E+00  6.255E+03   1.0E+00
    9   60  1.734E+01  0.000E+00  0.000E+00  0.000E+00  0.000E+00  0.000E+00  3.946E+03   0.0E+00
    9   61  1.735E+01  0.000E+00  0.000E+00  0.000E+00  0.000E+00  2.192E+04  0.000E+00   0.0E+00
    9   63  1.734E+01  0.000E+00  0.000E+00  0.000E+00  1.388E+06  1.532E+04  0.000E+00   0.0E+00
    9   64  1.678E+01  1.763E+12  7.445E-02  1.234E-02  0.000E+00  0.000E+00  2.489E+00   9.9E-01
    9   65  1.664E+01  2.449E+12  3.387E-02  5.565E-03  0.000E+00  0.000E+00  0.000E+00   1.0E+00
    9   66  1.660E+01  7.630E+11  3.153E-02  5.169E-03  0.000E+00  0.000E+00  9.270E+05   1.0E+00
    9   67  1.659E+01  2.350E+12  1.617E-01  2.649E-02  0.000E+00  0.000E+00  5.564E+05   1.0E+00
    9   68  1.599E+01  0.000E+00  0.000E+00  0.000E+00  2.763E+09  3.184E+02  0.000E+00   0.0E+00
    9   69  1.595E+01  0.000E+00  0.000E+00  0.000E+00  1.859E+09  2.070E+01  0.000E+00   0.0E+00
    9   70  1.594E+01  0.000E+00  0.000E+00  0.000E+00  4.646E+09  0.000E+00  0.000E+00   0.0E+00
    9   71  1.590E+01  0.000E+00  0.000E+00  0.000E+00  4.646E+09  1.743E+02  0.000E+00   0.0E+00
    9   72  1.564E+01  0.000E+00  0.000E+00  0.000E+00  0.000E+00  0.000E+00  1.358E+01   0.0E+00
    9   73  1.563E+01  8.703E+08  5.312E-05  8.200E-06  0.000E+00  0.000E+00  8.829E+01   1.0E+00
    9   75  1.562E+01  0.000E+00  0.000E+00  0.000E+00  0.000E+00  0.000E+00  1.304E+02   0.0E+00
    9   76  1.352E+01  4.705E+08  1.290E-05  1.723E-06  0.000E+00  0.000E+00  1.876E+02   7.9E-01
    9   77  1.346E+01  2.004E+07  1.815E-07  2.413E-08  0.000E+00  0.000E+00  0.000E+00   1.3E+00
    9   78  1.317E+01  0.000E+00  0.000E+00  0.000E+00  0.000E+00  1.900E+03  0.000E+00   0.0E+00
    9   79  1.317E+01  0.000E+00  0.000E+00  0.000E+00  1.032E+05  1.666E+02  0.000E+00   0.0E+00
    9   80  1.308E+01  0.000E+00  0.000E+00  0.000E+00  2.512E+05  1.024E+03  0.000E+00   0.0E+00
    9   81  1.304E+01  0.000E+00  0.000E+00  0.000E+00  5.734E+03  3.509E+00  0.000E+00   0.0E+00
    9   82  1.302E+01  0.000E+00  0.000E+00  0.000E+00  8.879E+04  1.405E+01  0.000E+00   0.0E+00
    9   83  1.301E+01  0.000E+00  0.000E+00  0.000E+00  2.239E+03  3.626E+01  0.000E+00   0.0E+00
    9   84  1.286E+01  5.210E+08  1.293E-05  1.642E-06  0.000E+00  0.000E+00  2.575E+02   2.3E-01
    9   85  1.286E+01  3.008E+08  1.244E-05  1.580E-06  0.000E+00  0.000E+00  4.709E+01   1.1E+00
    9   86  1.282E+01  0.000E+00  0.000E+00  0.000E+00  0.000E+00  0.000E+00  9.156E+02   0.0E+00
    9   87  1.281E+01  4.562E+08  1.122E-05  1.420E-06  0.000E+00  0.000E+00  8.720E+02   5.9E-01
    9   88  1.280E+01  1.533E+09  6.278E-05  7.938E-06  0.000E+00  0.000E+00  7.483E+01   6.5E-01
    9   89  1.275E+01  2.110E+08  1.714E-06  2.158E-07  0.000E+00  0.000E+00  0.000E+00   2.4E+00
    9   90  1.269E+01  2.431E+09  5.866E-05  7.351E-06  0.000E+00  0.000E+00  2.958E+01   1.1E+00
    9   91  1.268E+01  2.549E+09  1.024E-04  1.282E-05  0.000E+00  0.000E+00  1.047E+03   1.2E+00
    9   92  1.266E+01  0.000E+00  0.000E+00  0.000E+00  0.000E+00  0.000E+00  1.564E+01   0.0E+00
    9   93  1.264E+01  0.000E+00  0.000E+00  0.000E+00  0.000E+00  2.328E+01  0.000E+00   0.0E+00
    9   94  1.263E+01  0.000E+00  0.000E+00  0.000E+00  9.352E+04  6.697E+01  0.000E+00   0.0E+00
    9   95  1.263E+01  0.000E+00  0.000E+00  0.000E+00  1.016E+06  0.000E+00  0.000E+00   0.0E+00
    9   96  1.262E+01  0.000E+00  0.000E+00  0.000E+00  1.262E+05  1.160E+01  0.000E+00   0.0E+00
    9   98  1.261E+01  0.000E+00  0.000E+00  0.000E+00  4.148E+05  2.985E+00  0.000E+00   0.0E+00
    9   99  1.262E+01  2.148E+09  8.551E-05  1.066E-05  0.000E+00  0.000E+00  2.964E+03   1.0E+00
    9  100  1.261E+01  0.000E+00  0.000E+00  0.000E+00  1.649E+06  0.000E+00  0.000E+00   0.0E+00
    9  101  1.257E+01  0.000E+00  0.000E+00  0.000E+00  3.022E+06  2.686E+02  0.000E+00   0.0E+00
    9  102  1.253E+01  0.000E+00  0.000E+00  0.000E+00  5.517E+06  3.275E+00  0.000E+00   0.0E+00
    9  103  1.253E+01  0.000E+00  0.000E+00  0.000E+00  1.993E+07  0.000E+00  0.000E+00   0.0E+00
    9  105  1.252E+01  1.130E+09  2.655E-05  3.283E-06  0.000E+00  0.000E+00  4.172E+01   9.8E-01
    9  107  1.252E+01  1.474E+09  5.768E-05  7.130E-06  0.000E+00  0.000E+00  1.501E+03   9.9E-01
    9  108  1.251E+01  0.000E+00  0.000E+00  0.000E+00  0.000E+00  0.000E+00  1.559E+01   0.0E+00
    9  109  1.252E+01  0.000E+00  0.000E+00  0.000E+00  1.922E+06  0.000E+00  0.000E+00   0.0E+00
    9  110  1.251E+01  8.426E+09  3.295E-04  4.072E-05  0.000E+00  0.000E+00  7.622E+03   1.0E+00
    9  112  1.251E+01  0.000E+00  0.000E+00  0.000E+00  0.000E+00  0.000E+00  3.436E+03   0.0E+00
    9  118  1.245E+01  0.000E+00  0.000E+00  0.000E+00  2.212E+06  0.000E+00  0.000E+00   0.0E+00
    9  120  1.244E+01  0.000E+00  0.000E+00  0.000E+00  3.851E+06  6.930E-01  0.000E+00   0.0E+00
    9  121  1.243E+01  0.000E+00  0.000E+00  0.000E+00  2.558E+06  0.000E+00  0.000E+00   0.0E+00
    9  122  1.203E+01  0.000E+00  0.000E+00  0.000E+00  0.000E+00  2.941E+04  0.000E+00   0.0E+00
    9  123  1.203E+01  0.000E+00  0.000E+00  0.000E+00  9.543E+04  2.114E+04  0.000E+00   0.0E+00
    9  124  1.189E+01  9.807E+11  2.079E-02  2.441E-03  0.000E+00  0.000E+00  3.462E+00   9.8E-01
    9  125  1.186E+01  1.410E+12  9.907E-03  1.160E-03  0.000E+00  0.000E+00  0.000E+00   1.0E+00
    9  126  1.184E+01  4.392E+11  9.237E-03  1.081E-03  0.000E+00  0.000E+00  1.034E+06   9.9E-01
    9  127  1.184E+01  1.337E+12  4.686E-02  5.481E-03  0.000E+00  0.000E+00  6.180E+05   1.0E+00
    9  128  1.169E+01  0.000E+00  0.000E+00  0.000E+00  1.223E+09  5.016E+02  0.000E+00   0.0E+00
    9  129  1.168E+01  0.000E+00  0.000E+00  0.000E+00  8.380E+08  3.977E+01  0.000E+00   0.0E+00
    9  130  1.168E+01  0.000E+00  0.000E+00  0.000E+00  2.089E+09  0.000E+00  0.000E+00   0.0E+00
    9  131  1.167E+01  0.000E+00  0.000E+00  0.000E+00  2.120E+09  1.785E+02  0.000E+00   0.0E+00
    9  132  1.160E+01  0.000E+00  0.000E+00  0.000E+00  0.000E+00  0.000E+00  1.004E+01   0.0E+00
    9  133  1.159E+01  3.086E+08  1.036E-05  1.186E-06  0.000E+00  0.000E+00  6.118E+01   1.1E+00
    9  135  1.159E+01  0.000E+00  0.000E+00  0.000E+00  0.000E+00  0.000E+00  1.164E+02   0.0E+00
    9  137  1.158E+01  0.000E+00  0.000E+00  0.000E+00  5.056E+05  0.000E+00  0.000E+00   0.0E+00
   10   11  6.393E+02  0.000E+00  0.000E+00  0.000E+00  3.832E+01  0.000E+00  0.000E+00   0.0E+00
   10   12  2.282E+02  0.000E+00  0.000E+00  0.000E+00  1.533E+01  2.860E+02  0.000E+00   0.0E+00
   10   13  1.890E+02  0.000E+00  0.000E+00  0.000E+00  0.000E+00  0.000E+00  5.760E-04   0.0E+00
   10   14  1.811E+02  1.852E+09  5.465E-03  1.630E-02  0.000E+00  0.000E+00  3.180E+00   1.2E+00
   10   15  1.714E+02  3.303E+08  2.037E-03  5.749E-03  0.000E+00  0.000E+00  1.298E-02   1.0E+00
   10   16  1.684E+02  5.728E+09  2.434E-02  6.745E-02  0.000E+00  0.000E+00  1.972E+01   1.1E+00
   10   17  1.678E+02  0.000E+00  0.000E+00  0.000E+00  0.000E+00  0.000E+00  2.587E+01   0.0E+00
   10   18  1.670E+02  0.000E+00  0.000E+00  0.000E+00  5.624E+02  1.722E+06  0.000E+00   0.0E+00
   10   19  1.637E+02  0.000E+00  0.000E+00  0.000E+00  4.545E+02  1.073E+06  0.000E+00   0.0E+00
   10   20  1.607E+02  1.962E+09  7.597E-03  2.010E-02  0.000E+00  0.000E+00  4.033E+01   1.1E+00
   10   21  1.580E+02  0.000E+00  0.000E+00  0.000E+00  5.761E+03  0.000E+00  0.000E+00   0.0E+00
   10   22  1.532E+02  1.922E+10  9.473E-02  2.389E-01  0.000E+00  0.000E+00  2.555E+01   1.0E+00
   10   23  1.319E+02  7.044E+07  1.101E-04  2.390E-04  0.000E+00  0.000E+00  9.483E+01   4.0E+00
   10   24  8.245E+01  3.713E+07  3.784E-05  5.136E-05  0.000E+00  0.000E+00  1.210E+00   5.9E-01
   10   25  8.015E+01  6.636E+08  6.391E-04  8.432E-04  0.000E+00  0.000E+00  4.159E+00   6.2E-01
   10   26  7.926E+01  9.660E+06  1.274E-05  1.662E-05  0.000E+00  0.000E+00  3.701E-02   1.1E+00
   10   27  7.575E+01  8.496E+06  4.385E-06  5.468E-06  0.000E+00  0.000E+00  7.635E+01   1.5E+01
   10   28  6.184E+01  0.000E+00  0.000E+00  0.000E+00  2.199E-01  3.743E+04  0.000E+00   0.0E+00
   10   29  5.839E+01  0.000E+00  0.000E+00  0.000E+00  3.243E+04  0.000E+00  0.000E+00   0.0E+00
   10   30  4.772E+01  0.000E+00  0.000E+00  0.000E+00  0.000E+00  0.000E+00  1.217E+01   0.0E+00
   10   31  4.751E+01  1.119E+09  2.272E-04  1.777E-04  0.000E+00  0.000E+00  6.214E+01   8.6E-01
   10   32  4.437E+01  7.652E+10  2.258E-02  1.649E-02  0.000E+00  0.000E+00  6.697E+03   6.6E-01
   10   33  4.391E+01  1.382E+11  2.396E-02  1.732E-02  0.000E+00  0.000E+00  5.619E+03   6.2E-01
   10   34  3.510E+01  0.000E+00  0.000E+00  0.000E+00  6.370E+04  1.874E+02  0.000E+00   0.0E+00
   10   35  3.499E+01  0.000E+00  0.000E+00  0.000E+00  1.430E+05  8.779E+02  0.000E+00   0.0E+00
   10   36  3.472E+01  0.000E+00  0.000E+00  0.000E+00  1.756E+05  1.675E+00  0.000E+00   0.0E+00
   10   37  3.389E+01  0.000E+00  0.000E+00  0.000E+00  1.582E+04  1.286E+03  0.000E+00   0.0E+00
   10   38  1.961E+01  5.282E+11  3.047E-02  9.838E-03  0.000E+00  0.000E+00  1.907E+05   9.9E-01
   10   39  1.958E+01  8.298E+11  2.861E-02  9.220E-03  0.000E+00  0.000E+00  1.256E+05   1.0E+00
   10   40  1.889E+01  0.000E+00  0.000E+00  0.000E+00  4.011E+08  3.643E+05  0.000E+00   0.0E+00
   10   41  1.887E+01  0.000E+00  0.000E+00  0.000E+00  8.536E+08  2.639E+05  0.000E+00   0.0E+00
   10   42  1.867E+01  0.000E+00  0.000E+00  0.000E+00  4.985E+08  1.254E+04  0.000E+00   0.0E+00
   10   43  1.866E+01  0.000E+00  0.000E+00  0.000E+00  6.633E+08  9.045E+04  0.000E+00   0.0E+00
   10   44  1.861E+01  0.000E+00  0.000E+00  0.000E+00  5.031E+05  2.069E+04  0.000E+00   0.0E+00
   10   45  1.839E+01  0.000E+00  0.000E+00  0.000E+00  1.147E+09  0.000E+00  0.000E+00   0.0E+00
   10   46  1.794E+01  0.000E+00  0.000E+00  0.000E+00  0.000E+00  0.000E+00  9.302E-02   0.0E+00
   10   47  1.791E+01  7.819E+11  2.257E-02  6.653E-03  0.000E+00  0.000E+00  1.256E+05   9.8E-01
   10   48  1.788E+01  1.182E+11  7.933E-03  2.335E-03  0.000E+00  0.000E+00  5.675E+02   1.0E+00
   10   49  1.786E+01  1.511E+12  7.230E-02  2.126E-02  0.000E+00  0.000E+00  3.018E+05   9.9E-01
   10   50  1.786E+01  0.000E+00  0.000E+00  0.000E+00  0.000E+00  0.000E+00  7.241E+05   0.0E+00
   10   51  1.783E+01  9.238E+11  4.403E-02  1.292E-02  0.000E+00  0.000E+00  1.088E+06   9.9E-01
   10   52  1.779E+01  4.589E+12  3.050E-01  8.933E-02  0.000E+00  0.000E+00  4.480E+05   1.0E+00
   10   53  1.767E+01  4.661E+10  1.308E-03  3.805E-04  0.000E+00  0.000E+00  7.430E+05   8.5E-01
   10   54  1.747E+01  0.000E+00  0.000E+00  0.000E+00  5.788E+08  6.742E+00  0.000E+00   0.0E+00
   10   55  1.746E+01  0.000E+00  0.000E+00  0.000E+00  7.613E+08  0.000E+00  0.000E+00   0.0E+00
   10   56  1.745E+01  0.000E+00  0.000E+00  0.000E+00  1.716E+09  9.166E+02  0.000E+00   0.0E+00
   10   58  1.743E+01  0.000E+00  0.000E+00  0.000E+00  1.084E+09  9.797E+02  0.000E+00   0.0E+00
   10   59  1.743E+01  0.000E+00  0.000E+00  0.000E+00  1.939E+07  1.938E+02  0.000E+00   0.0E+00
   10   60  1.742E+01  0.000E+00  0.000E+00  0.000E+00  2.368E+09  1.166E+02  0.000E+00   0.0E+00
   10   61  1.744E+01  0.000E+00  0.000E+00  0.000E+00  0.000E+00  0.000E+00  1.849E+01   0.0E+00
   10   62  1.741E+01  0.000E+00  0.000E+00  0.000E+00  4.937E+09  0.000E+00  0.000E+00   0.0E+00
   10   63  1.742E+01  1.916E+09  5.229E-05  1.499E-05  0.000E+00  0.000E+00  1.587E+04   5.9E-01
   10   64  1.686E+01  0.000E+00  0.000E+00  0.000E+00  4.884E+05  1.172E+01  0.000E+00   0.0E+00
   10   65  1.671E+01  0.000E+00  0.000E+00  0.000E+00  9.017E+06  0.000E+00  0.000E+00   0.0E+00
   10   66  1.668E+01  0.000E+00  0.000E+00  0.000E+00  2.956E+03  1.356E+03  0.000E+00   0.0E+00
   10   67  1.667E+01  0.000E+00  0.000E+00  0.000E+00  4.912E+05  7.261E+02  0.000E+00   0.0E+00
   10   68  1.606E+01  6.606E+07  2.554E-06  6.753E-07  0.000E+00  0.000E+00  7.601E+01   1.7E+00
   10   69  1.602E+01  7.302E+08  2.810E-05  7.410E-06  0.000E+00  0.000E+00  5.969E+02   1.6E+00
   10   70  1.601E+01  4.089E+07  2.199E-06  5.796E-07  0.000E+00  0.000E+00  2.332E+01   9.3E-01
   10   71  1.597E+01  7.873E+08  1.806E-05  4.748E-06  0.000E+00  0.000E+00  1.512E+03   3.9E-01
   10   72  1.570E+01  0.000E+00  0.000E+00  0.000E+00  6.340E+04  6.822E-01  0.000E+00   0.0E+00
   10   73  1.570E+01  0.000E+00  0.000E+00  0.000E+00  2.951E+05  5.146E+00  0.000E+00   0.0E+00
   10   74  1.569E+01  0.000E+00  0.000E+00  0.000E+00  4.407E+04  0.000E+00  0.000E+00   0.0E+00
   10   75  1.569E+01  0.000E+00  0.000E+00  0.000E+00  1.037E+06  2.265E+01  0.000E+00   0.0E+00
   10   76  1.357E+01  0.000E+00  0.000E+00  0.000E+00  1.761E+03  4.256E+02  0.000E+00   0.0E+00
   10   77  1.351E+01  0.000E+00  0.000E+00  0.000E+00  1.781E+04  0.000E+00  0.000E+00   0.0E+00
   10   78  1.322E+01  0.000E+00  0.000E+00  0.000E+00  0.000E+00  0.000E+00  8.631E+01   0.0E+00
   10   79  1.322E+01  1.464E+10  2.300E-04  5.002E-05  0.000E+00  0.000E+00  5.010E+03   8.8E-01
   10   80  1.312E+01  1.109E+11  2.864E-03  6.188E-04  0.000E+00  0.000E+00  8.987E+04   9.6E-01
   10   81  1.309E+01  9.135E+10  1.408E-03  3.035E-04  0.000E+00  0.000E+00  2.362E+04   9.9E-01
   10   82  1.306E+01  2.862E+11  4.394E-03  9.450E-04  0.000E+00  0.000E+00  1.030E+05   1.0E+00
   10   83  1.306E+01  1.389E+11  3.550E-03  7.630E-04  0.000E+00  0.000E+00  1.110E+05   1.0E+00
   10   84  1.291E+01  0.000E+00  0.000E+00  0.000E+00  2.351E+08  2.861E+05  0.000E+00   0.0E+00
   10   85  1.291E+01  0.000E+00  0.000E+00  0.000E+00  4.554E+08  1.966E+05  0.000E+00   0.0E+00
   10   86  1.286E+01  0.000E+00  0.000E+00  0.000E+00  2.674E+08  1.397E+04  0.000E+00   0.0E+00
   10   87  1.286E+01  0.000E+00  0.000E+00  0.000E+00  3.259E+08  7.249E+04  0.000E+00   0.0E+00
   10   88  1.285E+01  0.000E+00  0.000E+00  0.000E+00  4.698E+05  2.613E+04  0.000E+00   0.0E+00
   10   89  1.280E+01  0.000E+00  0.000E+00  0.000E+00  7.132E+08  0.000E+00  0.000E+00   0.0E+00
   10   90  1.273E+01  0.000E+00  0.000E+00  0.000E+00  1.342E+05  3.221E+02  0.000E+00   0.0E+00
   10   91  1.272E+01  0.000E+00  0.000E+00  0.000E+00  9.431E+04  9.849E+02  0.000E+00   0.0E+00
   10   92  1.270E+01  0.000E+00  0.000E+00  0.000E+00  6.499E+03  2.843E+02  0.000E+00   0.0E+00
   10   93  1.269E+01  0.000E+00  0.000E+00  0.000E+00  0.000E+00  0.000E+00  1.022E+01   0.0E+00
   10   94  1.268E+01  4.037E+11  5.836E-03  1.218E-03  0.000E+00  0.000E+00  1.228E+05   9.7E-01
   10   95  1.267E+01  6.702E+10  2.259E-03  4.711E-04  0.000E+00  0.000E+00  3.523E+02   9.9E-01
   10   96  1.267E+01  6.976E+11  1.678E-02  3.499E-03  0.000E+00  0.000E+00  2.254E+05   9.8E-01
   10   97  1.266E+01  0.000E+00  0.000E+00  0.000E+00  0.000E+00  0.000E+00  7.574E+05   0.0E+00
   10   98  1.266E+01  5.813E+11  1.396E-02  2.910E-03  0.000E+00  0.000E+00  1.217E+06   9.9E-01
   10   99  1.267E+01  0.000E+00  0.000E+00  0.000E+00  1.593E+06  1.405E+02  0.000E+00   0.0E+00
   10  100  1.265E+01  2.437E+12  8.185E-02  1.704E-02  0.000E+00  0.000E+00  4.761E+05   9.9E-01
   10  101  1.262E+01  3.410E+10  4.882E-04  1.014E-04  0.000E+00  0.000E+00  8.504E+05   7.5E-01
   10  102  1.258E+01  2.928E+05  6.944E-09  1.437E-09  0.000E+00  0.000E+00  1.010E+01   1.1E+00
   10  103  1.257E+01  3.553E+08  1.178E-05  2.438E-06  0.000E+00  0.000E+00  1.038E+02   9.3E-01
   10  104  1.256E+01  0.000E+00  0.000E+00  0.000E+00  5.292E+07  0.000E+00  0.000E+00   0.0E+00
   10  105  1.256E+01  0.000E+00  0.000E+00  0.000E+00  4.336E+07  1.953E+01  0.000E+00   0.0E+00
   10  107  1.256E+01  0.000E+00  0.000E+00  0.000E+00  1.146E+08  4.680E+02  0.000E+00   0.0E+00
   10  108  1.256E+01  0.000E+00  0.000E+00  0.000E+00  2.691E+07  6.833E+02  0.000E+00   0.0E+00
   10  109  1.256E+01  3.420E+08  1.132E-05  2.340E-06  0.000E+00  0.000E+00  1.170E-01   9.1E-01
   10  110  1.255E+01  0.000E+00  0.000E+00  0.000E+00  1.964E+07  3.257E+01  0.000E+00   0.0E+00
   10  111  1.256E+01  0.000E+00  0.000E+00  0.000E+00  0.000E+00  0.000E+00  5.263E+00   0.0E+00
   10  112  1.255E+01  0.000E+00  0.000E+00  0.000E+00  2.422E+08  3.681E-02  0.000E+00   0.0E+00
   10  113  1.255E+01  0.000E+00  0.000E+00  0.000E+00  4.020E+08  0.000E+00  0.000E+00   0.0E+00
   10  116  1.254E+01  0.000E+00  0.000E+00  0.000E+00  0.000E+00  0.000E+00  5.689E+00   0.0E+00
   10  118  1.249E+01  4.720E+06  1.546E-07  3.180E-08  0.000E+00  0.000E+00  2.120E+01   1.2E+00
   10  119  1.249E+01  0.000E+00  0.000E+00  0.000E+00  0.000E+00  0.000E+00  1.789E+01   0.0E+00
   10  120  1.248E+01  8.992E+04  2.100E-09  4.315E-10  0.000E+00  0.000E+00  9.303E-01   1.2E+00
   10  121  1.247E+01  4.280E+07  1.398E-06  2.869E-07  0.000E+00  0.000E+00  1.129E+03   1.0E+00
   10  122  1.207E+01  0.000E+00  0.000E+00  0.000E+00  0.000E+00  0.000E+00  1.766E+01   0.0E+00
   10  123  1.207E+01  2.944E+07  3.857E-07  7.662E-08  0.000E+00  0.000E+00  1.375E+02   1.2E-03
   10  124  1.193E+01  0.000E+00  0.000E+00  0.000E+00  7.597E+01  8.456E+00  0.000E+00   0.0E+00
   10  125  1.190E+01  0.000E+00  0.000E+00  0.000E+00  3.081E+06  0.000E+00  0.000E+00   0.0E+00
   10  126  1.188E+01  0.000E+00  0.000E+00  0.000E+00  3.220E+04  4.314E+02  0.000E+00   0.0E+00
   10  127  1.188E+01  0.000E+00  0.000E+00  0.000E+00  1.681E+05  3.236E+02  0.000E+00   0.0E+00
   10  128  1.173E+01  4.099E+06  8.451E-08  1.631E-08  0.000E+00  0.000E+00  4.904E+00   7.1E+00
   10  129  1.172E+01  1.786E+07  3.676E-07  7.089E-08  0.000E+00  0.000E+00  1.826E+02   8.6E+00
   10  130  1.171E+01  4.343E+07  1.250E-06  2.411E-07  0.000E+00  0.000E+00  4.658E+01   8.2E-01
   10  131  1.170E+01  3.874E+08  4.774E-06  9.197E-07  0.000E+00  0.000E+00  1.572E+02   7.5E-02
   10  132  1.163E+01  0.000E+00  0.000E+00  0.000E+00  3.119E+01  2.624E-01  0.000E+00   0.0E+00
   10  133  1.163E+01  0.000E+00  0.000E+00  0.000E+00  1.908E+05  6.581E-01  0.000E+00   0.0E+00
   10  134  1.163E+01  0.000E+00  0.000E+00  0.000E+00  8.004E+03  0.000E+00  0.000E+00   0.0E+00
   10  135  1.163E+01  0.000E+00  0.000E+00  0.000E+00  9.082E+04  6.018E+00  0.000E+00   0.0E+00
   10  136  1.162E+01  0.000E+00  0.000E+00  0.000E+00  0.000E+00  0.000E+00  1.326E+00   0.0E+00
   10  137  1.161E+01  3.885E+05  1.100E-08  2.104E-09  0.000E+00  0.000E+00  6.934E-01   8.4E-03
   10  139  1.161E+01  0.000E+00  0.000E+00  0.000E+00  0.000E+00  0.000E+00  5.672E+00   0.0E+00
   11   12  3.549E+02  0.000E+00  0.000E+00  0.000E+00  0.000E+00  1.133E+00  0.000E+00   0.0E+00
   11   14  2.528E+02  2.679E+07  7.697E-04  6.405E-04  0.000E+00  0.000E+00  0.000E+00   2.1E+00
   11   16  2.285E+02  0.000E+00  0.000E+00  0.000E+00  0.000E+00  0.000E+00  1.741E+00   0.0E+00
   11   18  2.261E+02  0.000E+00  0.000E+00  0.000E+00  0.000E+00  5.569E+05  0.000E+00   0.0E+00
   11   19  2.200E+02  0.000E+00  0.000E+00  0.000E+00  7.569E+02  0.000E+00  0.000E+00   0.0E+00
   11   20  2.147E+02  0.000E+00  0.000E+00  0.000E+00  0.000E+00  0.000E+00  4.404E+00   0.0E+00
   11   23  1.661E+02  9.675E+09  1.201E-01  6.565E-02  0.000E+00  0.000E+00  0.000E+00   9.8E-01
   11   24  9.466E+01  0.000E+00  0.000E+00  0.000E+00  0.000E+00  0.000E+00  3.846E-01   0.0E+00
   11   25  9.164E+01  0.000E+00  0.000E+00  0.000E+00  0.000E+00  0.000E+00  4.678E+01   0.0E+00
   11   27  8.593E+01  2.130E+09  7.072E-03  2.001E-03  0.000E+00  0.000E+00  0.000E+00   1.3E+00
   11   28  6.847E+01  0.000E+00  0.000E+00  0.000E+00  0.000E+00  1.956E+04  0.000E+00   0.0E+00
   11   31  5.132E+01  3.306E+09  3.916E-03  6.617E-04  0.000E+00  0.000E+00  0.000E+00   3.8E-01
   11   32  4.768E+01  0.000E+00  0.000E+00  0.000E+00  0.000E+00  0.000E+00  1.808E+03   0.0E+00
   11   33  4.715E+01  5.192E+10  5.191E-02  8.058E-03  0.000E+00  0.000E+00  0.000E+00   7.6E-01
   11   34  3.714E+01  0.000E+00  0.000E+00  0.000E+00  0.000E+00  3.789E+02  0.000E+00   0.0E+00
   11   35  3.702E+01  0.000E+00  0.000E+00  0.000E+00  7.583E+04  0.000E+00  0.000E+00   0.0E+00
   11   37  3.579E+01  0.000E+00  0.000E+00  0.000E+00  1.301E+04  0.000E+00  0.000E+00   0.0E+00
   11   38  2.024E+01  0.000E+00  0.000E+00  0.000E+00  0.000E+00  0.000E+00  5.160E+04   0.0E+00
   11   39  2.020E+01  3.743E+11  6.867E-02  4.566E-03  0.000E+00  0.000E+00  0.000E+00   9.5E-01
   11   40  1.947E+01  0.000E+00  0.000E+00  0.000E+00  0.000E+00  1.769E+05  0.000E+00   0.0E+00
   11   41  1.944E+01  0.000E+00  0.000E+00  0.000E+00  2.180E+08  0.000E+00  0.000E+00   0.0E+00
   11   43  1.922E+01  0.000E+00  0.000E+00  0.000E+00  0.000E+00  1.811E+03  0.000E+00   0.0E+00
   11   44  1.917E+01  0.000E+00  0.000E+00  0.000E+00  2.009E+08  0.000E+00  0.000E+00   0.0E+00
   11   47  1.843E+01  1.201E+10  1.835E-03  1.113E-04  0.000E+00  0.000E+00  0.000E+00   8.9E-01
   11   49  1.838E+01  0.000E+00  0.000E+00  0.000E+00  0.000E+00  0.000E+00  1.386E+05   0.0E+00
   11   51  1.834E+01  0.000E+00  0.000E+00  0.000E+00  0.000E+00  0.000E+00  5.191E+05   0.0E+00
   11   53  1.817E+01  2.735E+12  4.060E-01  2.429E-02  0.000E+00  0.000E+00  0.000E+00   1.0E+00
   11   54  1.796E+01  0.000E+00  0.000E+00  0.000E+00  0.000E+00  4.614E+02  0.000E+00   0.0E+00
   11   56  1.794E+01  0.000E+00  0.000E+00  0.000E+00  2.095E+08  0.000E+00  0.000E+00   0.0E+00
   11   59  1.791E+01  0.000E+00  0.000E+00  0.000E+00  2.588E+09  0.000E+00  0.000E+00   0.0E+00
   11   63  1.791E+01  1.623E+11  2.340E-02  1.380E-03  0.000E+00  0.000E+00  0.000E+00   1.0E+00
   11   64  1.732E+01  0.000E+00  0.000E+00  0.000E+00  0.000E+00  1.963E+02  0.000E+00   0.0E+00
   11   66  1.712E+01  0.000E+00  0.000E+00  0.000E+00  0.000E+00  1.557E+04  0.000E+00   0.0E+00
   11   67  1.711E+01  0.000E+00  0.000E+00  0.000E+00  5.224E+07  0.000E+00  0.000E+00   0.0E+00
   11   68  1.647E+01  0.000E+00  0.000E+00  0.000E+00  0.000E+00  0.000E+00  2.364E+03   0.0E+00
   11   69  1.643E+01  0.000E+00  0.000E+00  0.000E+00  0.000E+00  0.000E+00  3.837E+04   0.0E+00
   11   71  1.638E+01  2.352E+11  2.838E-02  1.530E-03  0.000E+00  0.000E+00  0.000E+00   9.8E-01
   11   73  1.609E+01  0.000E+00  0.000E+00  0.000E+00  4.829E+08  0.000E+00  0.000E+00   0.0E+00
   11   76  1.387E+01  0.000E+00  0.000E+00  0.000E+00  0.000E+00  6.503E+01  0.000E+00   0.0E+00
   11   79  1.349E+01  5.361E+09  4.390E-04  1.950E-05  0.000E+00  0.000E+00  0.000E+00   9.4E-01
   11   80  1.340E+01  0.000E+00  0.000E+00  0.000E+00  0.000E+00  0.000E+00  2.406E+04   0.0E+00
   11   81  1.336E+01  3.453E+10  2.774E-03  1.221E-04  0.000E+00  0.000E+00  0.000E+00   9.7E-01
   11   82  1.334E+01  1.383E+11  1.107E-02  4.860E-04  0.000E+00  0.000E+00  0.000E+00   8.6E-01
   11   83  1.333E+01  0.000E+00  0.000E+00  0.000E+00  0.000E+00  0.000E+00  3.093E+04   0.0E+00
   11   84  1.318E+01  0.000E+00  0.000E+00  0.000E+00  0.000E+00  1.261E+05  0.000E+00   0.0E+00
   11   85  1.318E+01  0.000E+00  0.000E+00  0.000E+00  1.158E+08  0.000E+00  0.000E+00   0.0E+00
   11   87  1.312E+01  0.000E+00  0.000E+00  0.000E+00  0.000E+00  6.710E+03  0.000E+00   0.0E+00
   11   88  1.311E+01  0.000E+00  0.000E+00  0.000E+00  1.086E+08  0.000E+00  0.000E+00   0.0E+00
   11   90  1.299E+01  0.000E+00  0.000E+00  0.000E+00  0.000E+00  3.604E-01  0.000E+00   0.0E+00
   11   91  1.298E+01  0.000E+00  0.000E+00  0.000E+00  7.228E+05  0.000E+00  0.000E+00   0.0E+00
   11   94  1.293E+01  2.690E+09  2.024E-04  8.617E-06  0.000E+00  0.000E+00  0.000E+00   7.9E-01
   11   96  1.292E+01  0.000E+00  0.000E+00  0.000E+00  0.000E+00  0.000E+00  1.071E+05   0.0E+00
   11   98  1.291E+01  0.000E+00  0.000E+00  0.000E+00  0.000E+00  0.000E+00  5.892E+05   0.0E+00
   11   99  1.292E+01  0.000E+00  0.000E+00  0.000E+00  1.531E+07  0.000E+00  0.000E+00   0.0E+00
   11  101  1.287E+01  1.508E+12  1.123E-01  4.760E-03  0.000E+00  0.000E+00  0.000E+00   9.8E-01
   11  102  1.283E+01  0.000E+00  0.000E+00  0.000E+00  0.000E+00  0.000E+00  5.190E+01   0.0E+00
   11  105  1.281E+01  0.000E+00  0.000E+00  0.000E+00  0.000E+00  2.469E+02  0.000E+00   0.0E+00
   11  107  1.281E+01  0.000E+00  0.000E+00  0.000E+00  4.704E+03  0.000E+00  0.000E+00   0.0E+00
   11  110  1.281E+01  0.000E+00  0.000E+00  0.000E+00  1.756E+08  0.000E+00  0.000E+00   0.0E+00
   11  120  1.273E+01  0.000E+00  0.000E+00  0.000E+00  0.000E+00  0.000E+00  7.077E+01   0.0E+00
   11  123  1.230E+01  1.764E+10  1.200E-03  4.861E-05  0.000E+00  0.000E+00  0.000E+00   1.3E+00
   11  124  1.216E+01  0.000E+00  0.000E+00  0.000E+00  0.000E+00  2.800E+02  0.000E+00   0.0E+00
   11  126  1.211E+01  0.000E+00  0.000E+00  0.000E+00  0.000E+00  1.617E+04  0.000E+00   0.0E+00
   11  127  1.211E+01  0.000E+00  0.000E+00  0.000E+00  2.799E+07  0.000E+00  0.000E+00   0.0E+00
   11  128  1.195E+01  0.000E+00  0.000E+00  0.000E+00  0.000E+00  0.000E+00  3.008E+03   0.0E+00
   11  129  1.194E+01  0.000E+00  0.000E+00  0.000E+00  0.000E+00  0.000E+00  3.649E+04   0.0E+00
   11  131  1.192E+01  1.582E+11  1.012E-02  3.971E-04  0.000E+00  0.000E+00  0.000E+00   1.0E+00
   11  133  1.184E+01  0.000E+00  0.000E+00  0.000E+00  5.874E+07  0.000E+00  0.000E+00   0.0E+00
   12   13  1.100E+03  6.932E+04  4.193E-06  4.557E-05  0.000E+00  0.000E+00  0.000E+00   6.6E-01
   12   14  8.785E+02  6.692E+04  7.742E-06  6.717E-05  0.000E+00  0.000E+00  1.210E-06   4.1E-01
   12   15  6.892E+02  0.000E+00  0.000E+00  0.000E+00  0.000E+00  0.000E+00  3.012E-05   0.0E+00
   12   16  6.420E+02  6.457E+04  6.649E-06  4.215E-05  0.000E+00  0.000E+00  3.227E-05   4.2E+00
   12   18  6.229E+02  0.000E+00  0.000E+00  0.000E+00  6.520E+01  9.636E+03  0.000E+00   0.0E+00
   12   19  5.792E+02  0.000E+00  0.000E+00  0.000E+00  5.744E+01  4.241E+04  0.000E+00   0.0E+00
   12   20  5.435E+02  8.498E+03  6.273E-07  3.367E-06  0.000E+00  0.000E+00  1.185E-05   1.1E+01
   12   21  5.138E+02  0.000E+00  0.000E+00  0.000E+00  0.000E+00  8.219E+00  0.000E+00   0.0E+00
   12   22  4.665E+02  0.000E+00  0.000E+00  0.000E+00  0.000E+00  0.000E+00  3.224E-04   0.0E+00
   12   23  3.123E+02  2.834E+06  4.142E-05  1.277E-04  0.000E+00  0.000E+00  2.185E-04   2.9E+01
   12   24  1.291E+02  3.245E+10  1.351E-01  1.723E-01  0.000E+00  0.000E+00  5.144E+00   1.0E+00
   12   25  1.236E+02  1.532E+06  5.844E-06  7.131E-06  0.000E+00  0.000E+00  3.142E+01   7.7E-01
   12   26  1.214E+02  0.000E+00  0.000E+00  0.000E+00  0.000E+00  0.000E+00  8.652E+01   0.0E+00
   12   27  1.134E+02  1.625E+10  3.133E-02  3.508E-02  0.000E+00  0.000E+00  1.784E+01   8.5E-01
   12   28  8.483E+01  0.000E+00  0.000E+00  0.000E+00  4.096E+03  8.849E+02  0.000E+00   0.0E+00
   12   29  7.847E+01  0.000E+00  0.000E+00  0.000E+00  0.000E+00  1.474E-01  0.000E+00   0.0E+00
   12   30  6.034E+01  7.365E+10  1.340E-02  7.985E-03  0.000E+00  0.000E+00  0.000E+00   4.4E-01
   12   31  6.000E+01  4.545E+10  2.453E-02  1.454E-02  0.000E+00  0.000E+00  2.399E-01   4.5E-01
   12   32  5.508E+01  1.618E+08  1.226E-04  6.671E-05  0.000E+00  0.000E+00  3.873E+00   5.7E-01
   12   33  5.437E+01  1.748E+09  7.746E-04  4.160E-04  0.000E+00  0.000E+00  2.383E+01   6.5E-01
   12   34  4.149E+01  0.000E+00  0.000E+00  0.000E+00  8.302E+03  5.103E+01  0.000E+00   0.0E+00
   12   35  4.133E+01  0.000E+00  0.000E+00  0.000E+00  3.273E+04  2.164E+03  0.000E+00   0.0E+00
   12   36  4.095E+01  0.000E+00  0.000E+00  0.000E+00  1.330E+04  0.000E+00  0.000E+00   0.0E+00
   12   37  3.980E+01  0.000E+00  0.000E+00  0.000E+00  2.221E+04  8.415E+02  0.000E+00   0.0E+00
   12   38  2.146E+01  1.654E+08  1.903E-05  4.033E-06  0.000E+00  0.000E+00  3.469E+02   9.7E-01
   12   39  2.142E+01  7.058E+08  4.853E-05  1.026E-05  0.000E+00  0.000E+00  1.206E+02   1.0E+00
   12   40  2.060E+01  0.000E+00  0.000E+00  0.000E+00  1.484E+06  2.081E+03  0.000E+00   0.0E+00
   12   41  2.057E+01  0.000E+00  0.000E+00  0.000E+00  7.292E+05  4.853E+02  0.000E+00   0.0E+00
   12   42  2.033E+01  0.000E+00  0.000E+00  0.000E+00  2.892E+05  0.000E+00  0.000E+00   0.0E+00
   12   43  2.032E+01  0.000E+00  0.000E+00  0.000E+00  2.068E+05  5.595E-01  0.000E+00   0.0E+00
   12   44  2.027E+01  0.000E+00  0.000E+00  0.000E+00  6.962E+05  7.704E+01  0.000E+00   0.0E+00
   12   45  2.001E+01  0.000E+00  0.000E+00  0.000E+00  0.000E+00  2.420E+00  0.000E+00   0.0E+00
   12   46  1.947E+01  5.632E+09  1.067E-04  2.052E-05  0.000E+00  0.000E+00  0.000E+00   8.4E-01
   12   47  1.944E+01  3.071E+07  1.740E-06  3.339E-07  0.000E+00  0.000E+00  1.746E+02   2.4E-03
   12   48  1.940E+01  0.000E+00  0.000E+00  0.000E+00  0.000E+00  0.000E+00  7.631E+01   0.0E+00
   12   49  1.938E+01  1.020E+09  9.571E-05  1.832E-05  0.000E+00  0.000E+00  2.323E+01   8.4E-01
   12   51  1.934E+01  3.676E+09  3.435E-04  6.562E-05  0.000E+00  0.000E+00  1.679E+01   1.0E+00
   12   52  1.930E+01  0.000E+00  0.000E+00  0.000E+00  0.000E+00  0.000E+00  1.666E+03   0.0E+00
   12   53  1.915E+01  1.866E+10  1.026E-03  1.940E-04  0.000E+00  0.000E+00  1.283E+03   7.5E-01
   12   54  1.892E+01  0.000E+00  0.000E+00  0.000E+00  1.891E+06  3.069E-02  0.000E+00   0.0E+00
   12   56  1.890E+01  0.000E+00  0.000E+00  0.000E+00  2.086E+06  4.529E+01  0.000E+00   0.0E+00
   12   58  1.887E+01  0.000E+00  0.000E+00  0.000E+00  4.521E+04  0.000E+00  0.000E+00   0.0E+00
   12   59  1.887E+01  0.000E+00  0.000E+00  0.000E+00  5.113E+06  2.152E+01  0.000E+00   0.0E+00
   12   60  1.886E+01  0.000E+00  0.000E+00  0.000E+00  6.222E+06  0.000E+00  0.000E+00   0.0E+00
   12   61  1.888E+01  8.783E+11  1.565E-02  2.918E-03  0.000E+00  0.000E+00  0.000E+00   1.0E+00
   12   63  1.886E+01  5.488E+11  2.927E-02  5.451E-03  0.000E+00  0.000E+00  3.319E+00   1.0E+00
   12   64  1.821E+01  0.000E+00  0.000E+00  0.000E+00  4.117E+02  5.448E+03  0.000E+00   0.0E+00
   12   65  1.803E+01  0.000E+00  0.000E+00  0.000E+00  0.000E+00  7.853E+03  0.000E+00   0.0E+00
   12   66  1.799E+01  0.000E+00  0.000E+00  0.000E+00  1.224E+09  1.618E+05  0.000E+00   0.0E+00
   12   67  1.798E+01  0.000E+00  0.000E+00  0.000E+00  7.290E+08  4.591E+05  0.000E+00   0.0E+00
   12   68  1.728E+01  4.680E+12  3.490E-01  5.956E-02  0.000E+00  0.000E+00  4.099E+04   9.9E-01
   12   69  1.723E+01  3.243E+07  2.406E-06  4.094E-07  0.000E+00  0.000E+00  1.941E+05   1.0E+00
   12   70  1.722E+01  0.000E+00  0.000E+00  0.000E+00  0.000E+00  0.000E+00  4.851E+05   0.0E+00
   12   71  1.717E+01  1.509E+12  6.671E-02  1.131E-02  0.000E+00  0.000E+00  6.858E+04   1.0E+00
   12   72  1.687E+01  0.000E+00  0.000E+00  0.000E+00  6.283E+09  0.000E+00  0.000E+00   0.0E+00
   12   73  1.686E+01  0.000E+00  0.000E+00  0.000E+00  2.522E+09  3.416E+02  0.000E+00   0.0E+00
   12   75  1.684E+01  0.000E+00  0.000E+00  0.000E+00  2.922E+06  0.000E+00  0.000E+00   0.0E+00
   12   76  1.443E+01  0.000E+00  0.000E+00  0.000E+00  1.110E+04  2.051E+01  0.000E+00   0.0E+00
   12   77  1.436E+01  0.000E+00  0.000E+00  0.000E+00  0.000E+00  3.274E+01  0.000E+00   0.0E+00
   12   78  1.403E+01  3.242E+08  3.189E-06  4.419E-07  0.000E+00  0.000E+00  0.000E+00   6.2E-01
   12   79  1.403E+01  8.719E+08  2.572E-05  3.563E-06  0.000E+00  0.000E+00  6.533E+00   3.5E-01
   12   80  1.393E+01  7.337E+07  3.555E-06  4.889E-07  0.000E+00  0.000E+00  8.713E+01   2.2E+00
   12   81  1.389E+01  2.182E+09  6.310E-05  8.655E-06  0.000E+00  0.000E+00  2.700E+02   7.5E-01
   12   82  1.386E+01  3.210E+08  9.244E-06  1.265E-06  0.000E+00  0.000E+00  3.556E+02   1.0E+00
   12   83  1.385E+01  4.220E+08  2.023E-05  2.767E-06  0.000E+00  0.000E+00  4.036E+02   1.3E+00
   12   84  1.368E+01  0.000E+00  0.000E+00  0.000E+00  1.775E+06  1.192E+03  0.000E+00   0.0E+00
   12   85  1.368E+01  0.000E+00  0.000E+00  0.000E+00  1.488E+05  3.580E+02  0.000E+00   0.0E+00
   12   86  1.363E+01  0.000E+00  0.000E+00  0.000E+00  6.659E+04  0.000E+00  0.000E+00   0.0E+00
   12   87  1.362E+01  0.000E+00  0.000E+00  0.000E+00  1.345E+05  9.193E+00  0.000E+00   0.0E+00
   12   88  1.361E+01  0.000E+00  0.000E+00  0.000E+00  7.378E+05  7.006E+01  0.000E+00   0.0E+00
   12   89  1.356E+01  0.000E+00  0.000E+00  0.000E+00  0.000E+00  5.083E+01  0.000E+00   0.0E+00
   12   90  1.348E+01  0.000E+00  0.000E+00  0.000E+00  1.084E+06  3.121E+01  0.000E+00   0.0E+00
   12   91  1.348E+01  0.000E+00  0.000E+00  0.000E+00  4.589E+06  1.235E+02  0.000E+00   0.0E+00
   12   92  1.345E+01  0.000E+00  0.000E+00  0.000E+00  2.193E+06  0.000E+00  0.000E+00   0.0E+00
   12   93  1.343E+01  3.500E+09  3.155E-05  4.186E-06  0.000E+00  0.000E+00  0.000E+00   3.4E-01
   12   94  1.342E+01  1.200E+08  3.241E-06  4.297E-07  0.000E+00  0.000E+00  1.757E+02   5.7E+00
   12   95  1.342E+01  0.000E+00  0.000E+00  0.000E+00  0.000E+00  0.000E+00  4.791E-01   0.0E+00
   12   96  1.341E+01  2.175E+08  9.776E-06  1.295E-06  0.000E+00  0.000E+00  1.585E+01   4.1E-01
   12   98  1.340E+01  4.008E+09  1.799E-04  2.380E-05  0.000E+00  0.000E+00  4.998E+00   9.7E-01
   12   99  1.341E+01  0.000E+00  0.000E+00  0.000E+00  7.713E+05  3.594E+01  0.000E+00   0.0E+00
   12  100  1.339E+01  0.000E+00  0.000E+00  0.000E+00  0.000E+00  0.000E+00  1.859E+03   0.0E+00
   12  101  1.335E+01  3.391E+08  9.066E-06  1.196E-06  0.000E+00  0.000E+00  2.778E+03   3.6E+00
   12  102  1.331E+01  1.776E+09  7.863E-05  1.034E-05  0.000E+00  0.000E+00  5.717E+02   1.1E+00
   12  103  1.330E+01  0.000E+00  0.000E+00  0.000E+00  0.000E+00  0.000E+00  1.874E+02   0.0E+00
   12  105  1.330E+01  0.000E+00  0.000E+00  0.000E+00  2.632E+05  6.315E+00  0.000E+00   0.0E+00
   12  107  1.329E+01  0.000E+00  0.000E+00  0.000E+00  2.515E+05  5.656E-02  0.000E+00   0.0E+00
   12  108  1.329E+01  0.000E+00  0.000E+00  0.000E+00  7.987E+04  0.000E+00  0.000E+00   0.0E+00
   12  109  1.329E+01  0.000E+00  0.000E+00  0.000E+00  0.000E+00  0.000E+00  3.344E+02   0.0E+00
   12  110  1.328E+01  0.000E+00  0.000E+00  0.000E+00  9.055E+04  2.238E+01  0.000E+00   0.0E+00
   12  112  1.328E+01  0.000E+00  0.000E+00  0.000E+00  3.751E+05  0.000E+00  0.000E+00   0.0E+00
   12  118  1.322E+01  0.000E+00  0.000E+00  0.000E+00  0.000E+00  0.000E+00  3.333E+02   0.0E+00
   12  120  1.320E+01  4.241E+09  1.848E-04  2.409E-05  0.000E+00  0.000E+00  1.068E+03   1.0E+00
   12  121  1.319E+01  0.000E+00  0.000E+00  0.000E+00  0.000E+00  0.000E+00  1.178E+03   0.0E+00
   12  122  1.274E+01  4.124E+11  3.348E-03  4.214E-04  0.000E+00  0.000E+00  0.000E+00   1.0E+00
   12  123  1.274E+01  2.682E+11  6.528E-03  8.215E-04  0.000E+00  0.000E+00  4.925E+00   1.0E+00
   12  124  1.259E+01  0.000E+00  0.000E+00  0.000E+00  4.825E+02  6.386E+03  0.000E+00   0.0E+00
   12  125  1.255E+01  0.000E+00  0.000E+00  0.000E+00  0.000E+00  9.835E+03  0.000E+00   0.0E+00
   12  126  1.254E+01  0.000E+00  0.000E+00  0.000E+00  6.871E+08  1.086E+05  0.000E+00   0.0E+00
   12  127  1.253E+01  0.000E+00  0.000E+00  0.000E+00  4.116E+08  3.134E+05  0.000E+00   0.0E+00
   12  128  1.236E+01  2.511E+12  9.587E-02  1.170E-02  0.000E+00  0.000E+00  4.287E+04   9.9E-01
   12  129  1.235E+01  2.484E+07  9.468E-07  1.155E-07  0.000E+00  0.000E+00  2.056E+05   9.7E-01
   12  130  1.235E+01  0.000E+00  0.000E+00  0.000E+00  0.000E+00  0.000E+00  5.147E+05   0.0E+00
   12  131  1.234E+01  8.383E+11  1.913E-02  2.331E-03  0.000E+00  0.000E+00  7.332E+04   1.0E+00
   12  132  1.226E+01  0.000E+00  0.000E+00  0.000E+00  6.039E+08  0.000E+00  0.000E+00   0.0E+00
   12  133  1.225E+01  0.000E+00  0.000E+00  0.000E+00  2.481E+08  1.134E+02  0.000E+00   0.0E+00
   12  135  1.225E+01  0.000E+00  0.000E+00  0.000E+00  3.270E+05  0.000E+00  0.000E+00   0.0E+00
   12  137  1.224E+01  0.000E+00  0.000E+00  0.000E+00  0.000E+00  0.000E+00  4.349E+00   0.0E+00
   13   14  4.359E+03  0.000E+00  0.000E+00  0.000E+00  0.000E+00  1.767E+02  0.000E+00   0.0E+00
   13   16  1.541E+03  0.000E+00  0.000E+00  0.000E+00  8.719E-02  0.000E+00  0.000E+00   0.0E+00
   13   18  1.436E+03  1.003E+05  9.304E-05  4.398E-04  0.000E+00  0.000E+00  0.000E+00   4.2E+00
   13   19  1.223E+03  0.000E+00  0.000E+00  0.000E+00  0.000E+00  0.000E+00  6.800E-07   0.0E+00
   13   20  1.074E+03  0.000E+00  0.000E+00  0.000E+00  5.309E-04  0.000E+00  0.000E+00   0.0E+00
   13   23  4.360E+02  0.000E+00  0.000E+00  0.000E+00  0.000E+00  1.633E+04  0.000E+00   0.0E+00
   13   24  1.463E+02  0.000E+00  0.000E+00  0.000E+00  5.785E+02  0.000E+00  0.000E+00   0.0E+00
   13   25  1.392E+02  0.000E+00  0.000E+00  0.000E+00  2.261E+02  0.000E+00  0.000E+00   0.0E+00
   13   27  1.264E+02  0.000E+00  0.000E+00  0.000E+00  0.000E+00  8.640E+05  0.000E+00   0.0E+00
   13   28  9.192E+01  6.823E+05  2.593E-06  7.847E-07  0.000E+00  0.000E+00  0.000E+00   1.0E+01
   13   31  6.346E+01  0.000E+00  0.000E+00  0.000E+00  0.000E+00  6.438E+03  0.000E+00   0.0E+00
   13   32  5.798E+01  0.000E+00  0.000E+00  0.000E+00  4.638E+02  0.000E+00  0.000E+00   0.0E+00
   13   33  5.720E+01  0.000E+00  0.000E+00  0.000E+00  0.000E+00  5.858E+03  0.000E+00   0.0E+00
   13   34  4.311E+01  3.428E+10  2.866E-02  4.067E-03  0.000E+00  0.000E+00  0.000E+00   6.1E-01
   13   35  4.295E+01  0.000E+00  0.000E+00  0.000E+00  0.000E+00  0.000E+00  1.862E+03   0.0E+00
   13   37  4.129E+01  0.000E+00  0.000E+00  0.000E+00  0.000E+00  0.000E+00  3.222E+02   0.0E+00
   13   38  2.189E+01  0.000E+00  0.000E+00  0.000E+00  4.150E+07  0.000E+00  0.000E+00   0.0E+00
   13   39  2.184E+01  0.000E+00  0.000E+00  0.000E+00  0.000E+00  2.297E+02  0.000E+00   0.0E+00
   13   40  2.099E+01  1.208E+11  2.394E-02  1.655E-03  0.000E+00  0.000E+00  0.000E+00   1.1E+00
   13   41  2.096E+01  0.000E+00  0.000E+00  0.000E+00  0.000E+00  0.000E+00  6.197E+02   0.0E+00
   13   43  2.070E+01  6.587E+09  1.270E-03  8.656E-05  0.000E+00  0.000E+00  0.000E+00   1.0E+00
   13   44  2.065E+01  0.000E+00  0.000E+00  0.000E+00  0.000E+00  0.000E+00  8.991E-01   0.0E+00
   13   47  1.979E+01  0.000E+00  0.000E+00  0.000E+00  0.000E+00  6.374E+03  0.000E+00   0.0E+00
   13   49  1.973E+01  0.000E+00  0.000E+00  0.000E+00  1.867E+08  0.000E+00  0.000E+00   0.0E+00
   13   51  1.969E+01  0.000E+00  0.000E+00  0.000E+00  1.666E+06  0.000E+00  0.000E+00   0.0E+00
   13   53  1.949E+01  0.000E+00  0.000E+00  0.000E+00  0.000E+00  9.088E+02  0.000E+00   0.0E+00
   13   54  1.925E+01  5.709E+12  9.513E-01  6.028E-02  0.000E+00  0.000E+00  0.000E+00   9.9E-01
   13   56  1.923E+01  0.000E+00  0.000E+00  0.000E+00  0.000E+00  0.000E+00  2.074E-03   0.0E+00
   13   59  1.920E+01  0.000E+00  0.000E+00  0.000E+00  0.000E+00  0.000E+00  6.668E+05   0.0E+00
   13   63  1.919E+01  0.000E+00  0.000E+00  0.000E+00  0.000E+00  4.948E+00  0.000E+00   0.0E+00
   13   64  1.851E+01  1.838E+05  2.833E-08  1.727E-09  0.000E+00  0.000E+00  0.000E+00   1.7E-01
   13   66  1.829E+01  9.835E+08  1.480E-04  8.912E-06  0.000E+00  0.000E+00  0.000E+00   1.2E+00
   13   67  1.828E+01  0.000E+00  0.000E+00  0.000E+00  0.000E+00  0.000E+00  1.847E+02   0.0E+00
   13   68  1.755E+01  0.000E+00  0.000E+00  0.000E+00  9.310E+05  0.000E+00  0.000E+00   0.0E+00
   13   69  1.750E+01  0.000E+00  0.000E+00  0.000E+00  2.337E+06  0.000E+00  0.000E+00   0.0E+00
   13   71  1.744E+01  0.000E+00  0.000E+00  0.000E+00  0.000E+00  2.136E+02  0.000E+00   0.0E+00
   13   73  1.712E+01  0.000E+00  0.000E+00  0.000E+00  0.000E+00  0.000E+00  6.557E-01   0.0E+00
   13   76  1.462E+01  1.440E+09  1.385E-04  6.669E-06  0.000E+00  0.000E+00  0.000E+00   1.1E+00
   13   79  1.421E+01  0.000E+00  0.000E+00  0.000E+00  0.000E+00  2.954E+01  0.000E+00   0.0E+00
   13   80  1.410E+01  0.000E+00  0.000E+00  0.000E+00  1.655E+07  0.000E+00  0.000E+00   0.0E+00
   13   81  1.406E+01  0.000E+00  0.000E+00  0.000E+00  0.000E+00  3.262E+03  0.000E+00   0.0E+00
   13   82  1.404E+01  0.000E+00  0.000E+00  0.000E+00  0.000E+00  4.401E+02  0.000E+00   0.0E+00
   13   83  1.403E+01  0.000E+00  0.000E+00  0.000E+00  6.887E+06  0.000E+00  0.000E+00   0.0E+00
   13   84  1.386E+01  4.727E+10  4.082E-03  1.862E-04  0.000E+00  0.000E+00  0.000E+00   1.1E+00
   13   85  1.385E+01  0.000E+00  0.000E+00  0.000E+00  0.000E+00  0.000E+00  5.687E+02   0.0E+00
   13   87  1.380E+01  3.719E+09  3.183E-04  1.445E-05  0.000E+00  0.000E+00  0.000E+00   1.0E+00
   13   88  1.378E+01  0.000E+00  0.000E+00  0.000E+00  0.000E+00  0.000E+00  1.203E+00   0.0E+00
   13   90  1.365E+01  3.059E+10  2.564E-03  1.152E-04  0.000E+00  0.000E+00  0.000E+00   8.3E-01
   13   91  1.364E+01  0.000E+00  0.000E+00  0.000E+00  0.000E+00  0.000E+00  1.710E+01   0.0E+00
   13   94  1.359E+01  0.000E+00  0.000E+00  0.000E+00  0.000E+00  6.454E+03  0.000E+00   0.0E+00
   13   96  1.358E+01  0.000E+00  0.000E+00  0.000E+00  9.004E+07  0.000E+00  0.000E+00   0.0E+00
   13   98  1.357E+01  0.000E+00  0.000E+00  0.000E+00  1.912E+06  0.000E+00  0.000E+00   0.0E+00
   13   99  1.358E+01  0.000E+00  0.000E+00  0.000E+00  0.000E+00  0.000E+00  1.068E+03   0.0E+00
   13  101  1.352E+01  0.000E+00  0.000E+00  0.000E+00  0.000E+00  6.106E+02  0.000E+00   0.0E+00
   13  102  1.347E+01  0.000E+00  0.000E+00  0.000E+00  2.569E+09  0.000E+00  0.000E+00   0.0E+00
   13  105  1.346E+01  2.010E+12  1.637E-01  7.254E-03  0.000E+00  0.000E+00  0.000E+00   9.9E-01
   13  107  1.345E+01  0.000E+00  0.000E+00  0.000E+00  0.000E+00  0.000E+00  3.455E+04   0.0E+00
   13  110  1.345E+01  0.000E+00  0.000E+00  0.000E+00  0.000E+00  0.000E+00  4.643E+05   0.0E+00
   13  120  1.336E+01  0.000E+00  0.000E+00  0.000E+00  5.125E+08  0.000E+00  0.000E+00   0.0E+00
   13  123  1.289E+01  0.000E+00  0.000E+00  0.000E+00  0.000E+00  1.507E+01  0.000E+00   0.0E+00
   13  124  1.273E+01  1.967E+08  1.434E-05  6.011E-07  0.000E+00  0.000E+00  0.000E+00   9.0E-01
   13  126  1.268E+01  6.137E+08  4.438E-05  1.853E-06  0.000E+00  0.000E+00  0.000E+00   1.1E+00
   13  127  1.268E+01  0.000E+00  0.000E+00  0.000E+00  0.000E+00  0.000E+00  2.404E+02   0.0E+00
   13  128  1.250E+01  0.000E+00  0.000E+00  0.000E+00  4.294E+05  0.000E+00  0.000E+00   0.0E+00
   13  129  1.249E+01  0.000E+00  0.000E+00  0.000E+00  9.122E+05  0.000E+00  0.000E+00   0.0E+00
   13  131  1.248E+01  0.000E+00  0.000E+00  0.000E+00  0.000E+00  1.020E+01  0.000E+00   0.0E+00
   13  133  1.239E+01  0.000E+00  0.000E+00  0.000E+00  0.000E+00  0.000E+00  2.265E+01   0.0E+00
   14   15  3.200E+03  0.000E+00  0.000E+00  0.000E+00  5.818E-04  0.000E+00  0.000E+00   0.0E+00
   14   16  2.384E+03  0.000E+00  0.000E+00  0.000E+00  1.204E-02  9.669E+02  0.000E+00   0.0E+00
   14   18  2.142E+03  1.533E+04  1.054E-05  2.229E-04  0.000E+00  0.000E+00  4.815E-07   9.4E+00
   14   19  1.700E+03  3.322E+04  2.398E-05  4.026E-04  0.000E+00  0.000E+00  2.350E-07   9.4E-01
   14   20  1.425E+03  0.000E+00  0.000E+00  0.000E+00  2.148E-03  1.987E+02  0.000E+00   0.0E+00
   14   21  1.238E+03  7.040E+04  5.390E-06  6.590E-05  0.000E+00  0.000E+00  0.000E+00   2.7E+01
   14   22  9.949E+02  0.000E+00  0.000E+00  0.000E+00  4.469E-01  0.000E+00  0.000E+00   0.0E+00
   14   23  4.845E+02  0.000E+00  0.000E+00  0.000E+00  9.592E-01  3.258E+04  0.000E+00   0.0E+00
   14   24  1.513E+02  0.000E+00  0.000E+00  0.000E+00  5.397E+02  1.961E+05  0.000E+00   0.0E+00
   14   25  1.438E+02  0.000E+00  0.000E+00  0.000E+00  1.096E+01  2.335E+05  0.000E+00   0.0E+00
   14   26  1.409E+02  0.000E+00  0.000E+00  0.000E+00  5.862E+02  0.000E+00  0.000E+00   0.0E+00
   14   27  1.302E+02  0.000E+00  0.000E+00  0.000E+00  9.718E+01  1.795E+06  0.000E+00   0.0E+00
   14   28  9.390E+01  1.663E+04  2.198E-08  2.039E-08  0.000E+00  0.000E+00  1.318E-03   5.8E+02
   14   29  8.617E+01  2.750E+05  1.020E-07  8.683E-08  0.000E+00  0.000E+00  0.000E+00   1.1E+01
   14   30  6.479E+01  0.000E+00  0.000E+00  0.000E+00  0.000E+00  2.994E+02  0.000E+00   0.0E+00
   14   31  6.440E+01  0.000E+00  0.000E+00  0.000E+00  5.635E+01  1.561E+04  0.000E+00   0.0E+00
   14   32  5.876E+01  0.000E+00  0.000E+00  0.000E+00  4.026E+02  1.623E+02  0.000E+00   0.0E+00
   14   33  5.796E+01  0.000E+00  0.000E+00  0.000E+00  6.624E+02  5.548E+03  0.000E+00   0.0E+00
   14   34  4.354E+01  8.090E+10  2.300E-02  9.890E-03  0.000E+00  0.000E+00  6.828E+02   6.1E-01
   14   35  4.337E+01  1.629E+10  7.658E-03  3.281E-03  0.000E+00  0.000E+00  4.193E+03   6.0E-01
   14   36  4.295E+01  0.000E+00  0.000E+00  0.000E+00  0.000E+00  0.000E+00  8.333E+02   0.0E+00
   14   37  4.169E+01  1.579E+09  6.856E-04  2.823E-04  0.000E+00  0.000E+00  1.168E+03   6.3E-01
   14   38  2.200E+01  0.000E+00  0.000E+00  0.000E+00  1.217E+08  4.396E+01  0.000E+00   0.0E+00
   14   39  2.195E+01  0.000E+00  0.000E+00  0.000E+00  1.716E+06  3.018E+02  0.000E+00   0.0E+00
   14   40  2.109E+01  2.773E+11  1.850E-02  3.853E-03  0.000E+00  0.000E+00  3.550E+03   1.0E+00
   14   41  2.107E+01  2.162E+10  2.397E-03  4.987E-04  0.000E+00  0.000E+00  2.448E+03   1.1E+00
   14   42  2.081E+01  0.000E+00  0.000E+00  0.000E+00  0.000E+00  0.000E+00  2.224E+02   0.0E+00
   14   43  2.080E+01  1.626E+10  1.055E-03  2.168E-04  0.000E+00  0.000E+00  8.975E+03   1.0E+00
   14   44  2.075E+01  2.938E+10  3.160E-03  6.474E-04  0.000E+00  0.000E+00  3.237E+03   1.1E+00
   14   45  2.047E+01  6.397E+09  1.340E-04  2.709E-05  0.000E+00  0.000E+00  0.000E+00   1.1E+00
   14   46  1.991E+01  0.000E+00  0.000E+00  0.000E+00  0.000E+00  1.116E+03  0.000E+00   0.0E+00
   14   47  1.988E+01  0.000E+00  0.000E+00  0.000E+00  3.202E+08  1.192E+04  0.000E+00   0.0E+00
   14   48  1.984E+01  0.000E+00  0.000E+00  0.000E+00  6.062E+07  0.000E+00  0.000E+00   0.0E+00
   14   49  1.982E+01  0.000E+00  0.000E+00  0.000E+00  1.338E+08  1.654E+04  0.000E+00   0.0E+00
   14   51  1.978E+01  0.000E+00  0.000E+00  0.000E+00  5.665E+06  3.702E+03  0.000E+00   0.0E+00
   14   52  1.973E+01  0.000E+00  0.000E+00  0.000E+00  1.003E+08  0.000E+00  0.000E+00   0.0E+00
   14   53  1.958E+01  0.000E+00  0.000E+00  0.000E+00  8.170E+06  4.306E+01  0.000E+00   0.0E+00
   14   54  1.933E+01  5.664E+12  3.174E-01  6.060E-02  0.000E+00  0.000E+00  4.285E+05   9.9E-01
   14   56  1.931E+01  6.593E+12  6.144E-01  1.172E-01  0.000E+00  0.000E+00  8.014E+05   9.9E-01
   14   58  1.929E+01  0.000E+00  0.000E+00  0.000E+00  0.000E+00  0.000E+00  1.854E+05   0.0E+00
   14   59  1.928E+01  1.940E+11  1.802E-02  3.432E-03  0.000E+00  0.000E+00  1.076E+06   1.0E+00
   14   60  1.927E+01  0.000E+00  0.000E+00  0.000E+00  0.000E+00  0.000E+00  8.896E+04   0.0E+00
   14   61  1.930E+01  0.000E+00  0.000E+00  0.000E+00  0.000E+00  1.028E+02  0.000E+00   0.0E+00
   14   63  1.927E+01  0.000E+00  0.000E+00  0.000E+00  9.639E+05  1.644E+02  0.000E+00   0.0E+00
   14   64  1.859E+01  3.848E+07  1.994E-06  3.661E-07  0.000E+00  0.000E+00  5.822E+01   3.2E+00
   14   65  1.841E+01  4.612E+09  7.812E-05  1.420E-05  0.000E+00  0.000E+00  0.000E+00   1.3E+00
   14   66  1.837E+01  3.824E+08  1.934E-05  3.509E-06  0.000E+00  0.000E+00  3.989E+02   1.1E+00
   14   67  1.836E+01  5.249E+08  4.419E-05  8.012E-06  0.000E+00  0.000E+00  5.958E+01   1.1E+00
   14   68  1.762E+01  0.000E+00  0.000E+00  0.000E+00  6.875E+01  7.521E-01  0.000E+00   0.0E+00
   14   69  1.758E+01  0.000E+00  0.000E+00  0.000E+00  1.479E+05  1.017E+02  0.000E+00   0.0E+00
   14   70  1.756E+01  0.000E+00  0.000E+00  0.000E+00  2.750E+06  0.000E+00  0.000E+00   0.0E+00
   14   71  1.751E+01  0.000E+00  0.000E+00  0.000E+00  6.746E+06  4.692E+02  0.000E+00   0.0E+00
   14   72  1.720E+01  0.000E+00  0.000E+00  0.000E+00  0.000E+00  0.000E+00  1.047E+03   0.0E+00
   14   73  1.719E+01  3.261E+10  2.407E-03  4.085E-04  0.000E+00  0.000E+00  1.634E+03   9.7E-01
   14   75  1.717E+01  0.000E+00  0.000E+00  0.000E+00  0.000E+00  0.000E+00  3.826E+03   0.0E+00
   14   76  1.467E+01  3.515E+09  1.135E-04  1.644E-05  0.000E+00  0.000E+00  4.162E+02   1.1E+00
   14   77  1.460E+01  2.291E+06  2.440E-08  3.519E-09  0.000E+00  0.000E+00  0.000E+00   1.1E+01
   14   78  1.426E+01  0.000E+00  0.000E+00  0.000E+00  0.000E+00  1.357E+03  0.000E+00   0.0E+00
   14   79  1.426E+01  0.000E+00  0.000E+00  0.000E+00  1.508E+06  1.501E+03  0.000E+00   0.0E+00
   14   80  1.415E+01  0.000E+00  0.000E+00  0.000E+00  4.380E+07  1.043E+03  0.000E+00   0.0E+00
   14   81  1.411E+01  0.000E+00  0.000E+00  0.000E+00  1.124E+05  7.161E+02  0.000E+00   0.0E+00
   14   82  1.408E+01  0.000E+00  0.000E+00  0.000E+00  9.026E+05  1.296E+02  0.000E+00   0.0E+00
   14   83  1.407E+01  0.000E+00  0.000E+00  0.000E+00  2.391E+07  1.245E+03  0.000E+00   0.0E+00
   14   84  1.390E+01  1.095E+11  3.172E-03  4.355E-04  0.000E+00  0.000E+00  2.724E+03   1.1E+00
   14   85  1.390E+01  8.753E+09  4.225E-04  5.800E-05  0.000E+00  0.000E+00  2.014E+03   1.1E+00
   14   86  1.385E+01  0.000E+00  0.000E+00  0.000E+00  0.000E+00  0.000E+00  1.806E+02   0.0E+00
   14   87  1.384E+01  7.889E+09  2.265E-04  3.096E-05  0.000E+00  0.000E+00  8.042E+03   1.1E+00
   14   88  1.383E+01  1.245E+10  5.948E-04  8.123E-05  0.000E+00  0.000E+00  2.882E+03   1.1E+00
   14   89  1.377E+01  2.521E+09  2.388E-05  3.247E-06  0.000E+00  0.000E+00  0.000E+00   1.2E+00
   14   90  1.369E+01  3.547E+10  9.973E-04  1.349E-04  0.000E+00  0.000E+00  9.270E+03   8.6E-01
   14   91  1.369E+01  2.497E+10  1.169E-03  1.579E-04  0.000E+00  0.000E+00  9.430E+03   8.2E-01
   14   92  1.366E+01  0.000E+00  0.000E+00  0.000E+00  0.000E+00  0.000E+00  1.881E+02   0.0E+00
   14   93  1.364E+01  0.000E+00  0.000E+00  0.000E+00  0.000E+00  2.605E+03  0.000E+00   0.0E+00
   14   94  1.363E+01  0.000E+00  0.000E+00  0.000E+00  1.508E+08  9.583E+03  0.000E+00   0.0E+00
   14   95  1.362E+01  0.000E+00  0.000E+00  0.000E+00  3.084E+07  0.000E+00  0.000E+00   0.0E+00
   14   96  1.362E+01  0.000E+00  0.000E+00  0.000E+00  5.788E+07  1.306E+04  0.000E+00   0.0E+00
   14   98  1.361E+01  0.000E+00  0.000E+00  0.000E+00  6.049E+06  3.552E+03  0.000E+00   0.0E+00
   14   99  1.362E+01  7.008E+09  3.248E-04  4.369E-05  0.000E+00  0.000E+00  9.022E+03   9.4E-01
   14  100  1.360E+01  0.000E+00  0.000E+00  0.000E+00  5.113E+07  0.000E+00  0.000E+00   0.0E+00
   14  101  1.356E+01  0.000E+00  0.000E+00  0.000E+00  3.105E+06  7.929E-01  0.000E+00   0.0E+00
   14  102  1.352E+01  0.000E+00  0.000E+00  0.000E+00  3.332E+09  2.124E+02  0.000E+00   0.0E+00
   14  103  1.351E+01  0.000E+00  0.000E+00  0.000E+00  1.950E+09  0.000E+00  0.000E+00   0.0E+00
   14  105  1.350E+01  1.978E+12  5.405E-02  7.205E-03  0.000E+00  0.000E+00  3.065E+05   9.9E-01
   14  107  1.349E+01  2.371E+12  1.079E-01  1.438E-02  0.000E+00  0.000E+00  2.471E+05   9.9E-01
   14  108  1.349E+01  0.000E+00  0.000E+00  0.000E+00  0.000E+00  0.000E+00  1.831E+05   0.0E+00
   14  109  1.349E+01  0.000E+00  0.000E+00  0.000E+00  1.234E+09  0.000E+00  0.000E+00   0.0E+00
   14  110  1.349E+01  1.970E+10  8.958E-04  1.193E-04  0.000E+00  0.000E+00  1.126E+06   9.9E-01
   14  112  1.349E+01  0.000E+00  0.000E+00  0.000E+00  0.000E+00  0.000E+00  2.145E+04   0.0E+00
   14  118  1.342E+01  0.000E+00  0.000E+00  0.000E+00  3.003E+08  0.000E+00  0.000E+00   0.0E+00
   14  120  1.340E+01  0.000E+00  0.000E+00  0.000E+00  7.239E+08  6.135E+00  0.000E+00   0.0E+00
   14  121  1.340E+01  0.000E+00  0.000E+00  0.000E+00  1.839E+08  0.000E+00  0.000E+00   0.0E+00
   14  122  1.293E+01  0.000E+00  0.000E+00  0.000E+00  0.000E+00  8.957E+01  0.000E+00   0.0E+00
   14  123  1.293E+01  0.000E+00  0.000E+00  0.000E+00  2.334E+05  6.553E+01  0.000E+00   0.0E+00
   14  124  1.277E+01  1.029E+08  2.515E-06  3.172E-07  0.000E+00  0.000E+00  1.127E+01   1.1E-01
   14  125  1.273E+01  2.142E+09  1.736E-05  2.183E-06  0.000E+00  0.000E+00  0.000E+00   1.7E+00
   14  126  1.272E+01  1.152E+08  2.793E-06  3.508E-07  0.000E+00  0.000E+00  3.534E+02   6.4E-01
   14  127  1.272E+01  5.191E+08  2.097E-05  2.633E-06  0.000E+00  0.000E+00  1.480E+02   1.1E+00
   14  128  1.254E+01  0.000E+00  0.000E+00  0.000E+00  1.910E+03  7.377E-02  0.000E+00   0.0E+00
   14  129  1.253E+01  0.000E+00  0.000E+00  0.000E+00  3.765E+04  4.568E+01  0.000E+00   0.0E+00
   14  130  1.252E+01  0.000E+00  0.000E+00  0.000E+00  1.196E+06  0.000E+00  0.000E+00   0.0E+00
   14  131  1.251E+01  0.000E+00  0.000E+00  0.000E+00  2.872E+06  8.236E+00  0.000E+00   0.0E+00
   14  132  1.243E+01  0.000E+00  0.000E+00  0.000E+00  0.000E+00  0.000E+00  7.706E+02   0.0E+00
   14  133  1.243E+01  1.405E+10  5.419E-04  6.651E-05  0.000E+00  0.000E+00  9.721E+02   9.8E-01
   14  135  1.242E+01  0.000E+00  0.000E+00  0.000E+00  0.000E+00  0.000E+00  2.806E+03   0.0E+00
   14  137  1.241E+01  0.000E+00  0.000E+00  0.000E+00  2.182E+07  0.000E+00  0.000E+00   0.0E+00
   15   16  9.359E+03  0.000E+00  0.000E+00  0.000E+00  1.890E-05  5.060E+00  0.000E+00   0.0E+00
   15   17  8.006E+03  0.000E+00  0.000E+00  0.000E+00  2.438E-05  2.256E+01  0.000E+00   0.0E+00
   15   18  6.476E+03  0.000E+00  0.000E+00  0.000E+00  0.000E+00  0.000E+00  1.215E-09   0.0E+00
   15   19  3.626E+03  2.674E+02  3.766E-07  3.147E-05  0.000E+00  0.000E+00  2.410E-08   2.6E+02
   15   20  2.570E+03  0.000E+00  0.000E+00  0.000E+00  1.512E-02  3.141E+02  0.000E+00   0.0E+00
   15   22  1.444E+03  0.000E+00  0.000E+00  0.000E+00  7.938E-02  7.272E+02  0.000E+00   0.0E+00
   15   23  5.709E+02  0.000E+00  0.000E+00  0.000E+00  3.991E+00  0.000E+00  0.000E+00   0.0E+00
   15   24  1.589E+02  0.000E+00  0.000E+00  0.000E+00  8.786E+02  3.158E+06  0.000E+00   0.0E+00
   15   25  1.505E+02  0.000E+00  0.000E+00  0.000E+00  6.173E+01  1.917E+03  0.000E+00   0.0E+00
   15   26  1.474E+02  0.000E+00  0.000E+00  0.000E+00  1.017E+01  1.306E+03  0.000E+00   0.0E+00
   15   27  1.357E+02  0.000E+00  0.000E+00  0.000E+00  4.349E+03  0.000E+00  0.000E+00   0.0E+00
   15   28  9.674E+01  0.000E+00  0.000E+00  0.000E+00  0.000E+00  0.000E+00  1.022E-01   0.0E+00
   15   31  6.572E+01  0.000E+00  0.000E+00  0.000E+00  1.268E+03  0.000E+00  0.000E+00   0.0E+00
   15   32  5.986E+01  0.000E+00  0.000E+00  0.000E+00  1.325E+03  1.130E+03  0.000E+00   0.0E+00
   15   33  5.903E+01  0.000E+00  0.000E+00  0.000E+00  9.618E+01  0.000E+00  0.000E+00   0.0E+00
   15   34  4.414E+01  0.000E+00  0.000E+00  0.000E+00  0.000E+00  0.000E+00  1.361E+04   0.0E+00
   15   35  4.397E+01  1.969E+11  4.077E-02  4.132E-02  0.000E+00  0.000E+00  4.388E+03   6.2E-01
   15   36  4.354E+01  8.776E+07  2.494E-05  2.502E-05  0.000E+00  0.000E+00  1.230E+01   9.5E-01
   15   37  4.224E+01  5.339E+10  1.020E-02  9.930E-03  0.000E+00  0.000E+00  1.738E+03   5.9E-01
   15   38  2.215E+01  0.000E+00  0.000E+00  0.000E+00  1.208E+08  1.207E+01  0.000E+00   0.0E+00
   15   39  2.210E+01  0.000E+00  0.000E+00  0.000E+00  2.733E+08  0.000E+00  0.000E+00   0.0E+00
   15   40  2.123E+01  0.000E+00  0.000E+00  0.000E+00  0.000E+00  0.000E+00  3.677E+03   0.0E+00
   15   41  2.120E+01  4.445E+11  2.141E-02  1.046E-02  0.000E+00  0.000E+00  2.558E+03   1.0E+00
   15   42  2.095E+01  5.075E+10  3.339E-03  1.612E-03  0.000E+00  0.000E+00  7.281E+01   1.0E+00
   15   43  2.094E+01  0.000E+00  0.000E+00  0.000E+00  0.000E+00  0.000E+00  1.524E-02   0.0E+00
   15   44  2.088E+01  9.139E+09  4.267E-04  2.053E-04  0.000E+00  0.000E+00  1.157E+01   1.0E+00
   15   47  2.000E+01  0.000E+00  0.000E+00  0.000E+00  1.516E+08  0.000E+00  0.000E+00   0.0E+00
   15   48  1.996E+01  0.000E+00  0.000E+00  0.000E+00  2.953E+08  1.213E+04  0.000E+00   0.0E+00
   15   49  1.994E+01  0.000E+00  0.000E+00  0.000E+00  2.212E+08  2.822E+03  0.000E+00   0.0E+00
   15   50  1.993E+01  0.000E+00  0.000E+00  0.000E+00  1.434E+08  1.109E+04  0.000E+00   0.0E+00
   15   51  1.990E+01  0.000E+00  0.000E+00  0.000E+00  1.734E+08  9.258E+02  0.000E+00   0.0E+00
   15   52  1.985E+01  0.000E+00  0.000E+00  0.000E+00  8.828E+07  3.672E+03  0.000E+00   0.0E+00
   15   53  1.970E+01  0.000E+00  0.000E+00  0.000E+00  4.030E+07  0.000E+00  0.000E+00   0.0E+00
   15   54  1.945E+01  0.000E+00  0.000E+00  0.000E+00  0.000E+00  0.000E+00  2.098E+04   0.0E+00
   15   55  1.944E+01  1.079E+13  7.858E-01  3.520E-01  0.000E+00  0.000E+00  4.694E+05   1.0E+00
   15   56  1.943E+01  1.688E+11  6.823E-03  3.055E-03  0.000E+00  0.000E+00  1.089E+05   1.0E+00
   15   57  1.942E+01  0.000E+00  0.000E+00  0.000E+00  0.000E+00  0.000E+00  9.407E+05   0.0E+00
   15   58  1.941E+01  2.161E+12  1.220E-01  5.455E-02  0.000E+00  0.000E+00  4.276E+05   9.9E-01
   15   59  1.940E+01  8.756E+10  3.528E-03  1.577E-03  0.000E+00  0.000E+00  1.834E+04   9.9E-01
   15   60  1.939E+01  1.566E+11  8.831E-03  3.946E-03  0.000E+00  0.000E+00  1.113E+04   1.0E+00
   15   62  1.938E+01  1.809E+11  1.310E-02  5.849E-03  0.000E+00  0.000E+00  4.412E+05   1.0E+00
   15   63  1.939E+01  0.000E+00  0.000E+00  0.000E+00  1.718E+06  0.000E+00  0.000E+00   0.0E+00
   15   64  1.870E+01  0.000E+00  0.000E+00  0.000E+00  0.000E+00  0.000E+00  1.464E+02   0.0E+00
   15   66  1.848E+01  0.000E+00  0.000E+00  0.000E+00  0.000E+00  0.000E+00  5.221E+01   0.0E+00
   15   67  1.846E+01  1.441E+08  5.260E-06  2.238E-06  0.000E+00  0.000E+00  1.492E+02   2.5E+00
   15   68  1.772E+01  0.000E+00  0.000E+00  0.000E+00  1.448E+05  4.050E+02  0.000E+00   0.0E+00
   15   69  1.767E+01  0.000E+00  0.000E+00  0.000E+00  3.088E+05  1.259E+01  0.000E+00   0.0E+00
   15   70  1.766E+01  0.000E+00  0.000E+00  0.000E+00  5.737E+05  6.651E+01  0.000E+00   0.0E+00
   15   71  1.761E+01  0.000E+00  0.000E+00  0.000E+00  1.684E-01  0.000E+00  0.000E+00   0.0E+00
   15   72  1.729E+01  1.326E+08  5.942E-06  2.367E-06  0.000E+00  0.000E+00  1.566E+01   1.7E+00
   15   73  1.728E+01  6.086E+06  1.946E-07  7.748E-08  0.000E+00  0.000E+00  1.949E+02   2.1E-02
   15   74  1.727E+01  1.434E+10  8.245E-04  3.281E-04  0.000E+00  0.000E+00  1.011E+04   9.9E-01
   15   75  1.727E+01  1.403E+09  6.271E-05  2.495E-05  0.000E+00  0.000E+00  2.608E+03   1.1E+00
   15   76  1.474E+01  0.000E+00  0.000E+00  0.000E+00  0.000E+00  0.000E+00  1.140E+01   0.0E+00
   15   79  1.432E+01  0.000E+00  0.000E+00  0.000E+00  6.882E+06  0.000E+00  0.000E+00   0.0E+00
   15   80  1.421E+01  0.000E+00  0.000E+00  0.000E+00  3.080E+07  3.289E+01  0.000E+00   0.0E+00
   15   81  1.417E+01  0.000E+00  0.000E+00  0.000E+00  3.204E+07  0.000E+00  0.000E+00   0.0E+00
   15   82  1.414E+01  0.000E+00  0.000E+00  0.000E+00  1.124E+08  0.000E+00  0.000E+00   0.0E+00
   15   83  1.413E+01  0.000E+00  0.000E+00  0.000E+00  3.591E+07  3.868E+00  0.000E+00   0.0E+00
   15   84  1.396E+01  0.000E+00  0.000E+00  0.000E+00  0.000E+00  0.000E+00  3.425E+03   0.0E+00
   15   85  1.396E+01  1.863E+11  3.888E-03  1.251E-03  0.000E+00  0.000E+00  2.352E+03   1.0E+00
   15   86  1.390E+01  2.168E+10  6.283E-04  2.013E-04  0.000E+00  0.000E+00  1.292E+02   1.0E+00
   15   87  1.390E+01  0.000E+00  0.000E+00  0.000E+00  0.000E+00  0.000E+00  1.734E+00   0.0E+00
   15   88  1.389E+01  3.585E+09  7.404E-05  2.370E-05  0.000E+00  0.000E+00  1.349E+01   9.2E-01
   15   90  1.375E+01  0.000E+00  0.000E+00  0.000E+00  0.000E+00  0.000E+00  3.705E+02   0.0E+00
   15   91  1.374E+01  1.657E+09  3.352E-05  1.062E-05  0.000E+00  0.000E+00  1.261E+03   3.6E+00
   15   92  1.372E+01  1.258E+09  3.551E-05  1.123E-05  0.000E+00  0.000E+00  3.393E+03   5.1E-01
   15   94  1.369E+01  0.000E+00  0.000E+00  0.000E+00  6.569E+07  0.000E+00  0.000E+00   0.0E+00
   15   95  1.368E+01  0.000E+00  0.000E+00  0.000E+00  1.435E+08  1.273E+04  0.000E+00   0.0E+00
   15   96  1.368E+01  0.000E+00  0.000E+00  0.000E+00  1.269E+08  3.488E+03  0.000E+00   0.0E+00
   15   97  1.368E+01  0.000E+00  0.000E+00  0.000E+00  6.692E+07  7.369E+03  0.000E+00   0.0E+00
   15   98  1.367E+01  0.000E+00  0.000E+00  0.000E+00  6.900E+07  9.882E+02  0.000E+00   0.0E+00
   15   99  1.368E+01  4.438E+07  8.892E-07  2.803E-07  0.000E+00  0.000E+00  4.089E+00   4.7E+00
   15  100  1.366E+01  0.000E+00  0.000E+00  0.000E+00  4.468E+07  2.001E+03  0.000E+00   0.0E+00
   15  101  1.362E+01  0.000E+00  0.000E+00  0.000E+00  1.954E+07  0.000E+00  0.000E+00   0.0E+00
   15  102  1.357E+01  0.000E+00  0.000E+00  0.000E+00  3.922E+07  5.360E+02  0.000E+00   0.0E+00
   15  103  1.356E+01  0.000E+00  0.000E+00  0.000E+00  6.176E+07  7.916E+00  0.000E+00   0.0E+00
   15  104  1.356E+01  3.792E+12  1.344E-01  4.198E-02  0.000E+00  0.000E+00  3.515E+05   1.0E+00
   15  105  1.356E+01  0.000E+00  0.000E+00  0.000E+00  0.000E+00  0.000E+00  1.491E+04   0.0E+00
   15  106  1.355E+01  0.000E+00  0.000E+00  0.000E+00  0.000E+00  0.000E+00  6.928E+05   0.0E+00
   15  107  1.355E+01  7.465E+10  1.468E-03  4.585E-04  0.000E+00  0.000E+00  8.850E+04   1.1E+00
   15  108  1.355E+01  8.345E+11  2.297E-02  7.172E-03  0.000E+00  0.000E+00  2.638E+05   9.8E-01
   15  109  1.355E+01  0.000E+00  0.000E+00  0.000E+00  3.288E+08  1.483E+01  0.000E+00   0.0E+00
   15  110  1.355E+01  1.126E+10  2.213E-04  6.908E-05  0.000E+00  0.000E+00  1.727E+03   9.8E-01
   15  111  1.355E+01  0.000E+00  0.000E+00  0.000E+00  1.818E+08  2.898E+00  0.000E+00   0.0E+00
   15  112  1.355E+01  2.003E+08  5.509E-06  1.720E-06  0.000E+00  0.000E+00  5.787E+04   6.2E-01
   15  113  1.354E+01  4.856E+10  1.717E-03  5.360E-04  0.000E+00  0.000E+00  3.151E+05   1.0E+00
   15  114  1.354E+01  0.000E+00  0.000E+00  0.000E+00  7.473E+09  0.000E+00  0.000E+00   0.0E+00
   15  116  1.353E+01  0.000E+00  0.000E+00  0.000E+00  2.031E+09  9.830E+00  0.000E+00   0.0E+00
   15  117  1.353E+01  0.000E+00  0.000E+00  0.000E+00  1.216E+08  0.000E+00  0.000E+00   0.0E+00
   15  118  1.348E+01  0.000E+00  0.000E+00  0.000E+00  6.932E+07  7.431E+00  0.000E+00   0.0E+00
   15  119  1.347E+01  0.000E+00  0.000E+00  0.000E+00  1.985E+07  1.660E+00  0.000E+00   0.0E+00
   15  120  1.346E+01  0.000E+00  0.000E+00  0.000E+00  9.418E+06  8.127E+02  0.000E+00   0.0E+00
   15  121  1.345E+01  0.000E+00  0.000E+00  0.000E+00  9.093E+05  1.642E+01  0.000E+00   0.0E+00
   15  123  1.298E+01  0.000E+00  0.000E+00  0.000E+00  2.047E+05  0.000E+00  0.000E+00   0.0E+00
   15  124  1.282E+01  0.000E+00  0.000E+00  0.000E+00  0.000E+00  0.000E+00  1.101E+02   0.0E+00
   15  126  1.277E+01  0.000E+00  0.000E+00  0.000E+00  0.000E+00  0.000E+00  1.622E+01   0.0E+00
   15  127  1.277E+01  1.649E+07  2.877E-07  8.463E-08  0.000E+00  0.000E+00  4.963E+01   1.3E+01
   15  128  1.259E+01  0.000E+00  0.000E+00  0.000E+00  1.211E+04  2.757E+02  0.000E+00   0.0E+00
   15  129  1.257E+01  0.000E+00  0.000E+00  0.000E+00  2.364E+04  1.127E+01  0.000E+00   0.0E+00
   15  130  1.257E+01  0.000E+00  0.000E+00  0.000E+00  3.377E+05  7.814E+01  0.000E+00   0.0E+00
   15  131  1.256E+01  0.000E+00  0.000E+00  0.000E+00  2.658E+05  0.000E+00  0.000E+00   0.0E+00
   15  132  1.248E+01  1.882E+07  4.394E-07  1.263E-07  0.000E+00  0.000E+00  1.945E+01   5.3E+00
   15  133  1.248E+01  1.586E+08  2.644E-06  7.600E-07  0.000E+00  0.000E+00  3.791E+02   2.3E-02
   15  134  1.247E+01  5.749E+09  1.724E-04  4.955E-05  0.000E+00  0.000E+00  7.908E+03   1.0E+00
   15  135  1.247E+01  4.654E+08  1.086E-05  3.120E-06  0.000E+00  0.000E+00  1.920E+03   1.4E+00
   15  136  1.246E+01  0.000E+00  0.000E+00  0.000E+00  9.624E+05  3.433E-02  0.000E+00   0.0E+00
   15  137  1.246E+01  0.000E+00  0.000E+00  0.000E+00  4.013E+04  7.576E+00  0.000E+00   0.0E+00
   15  138  1.246E+01  0.000E+00  0.000E+00  0.000E+00  1.105E+07  0.000E+00  0.000E+00   0.0E+00
   15  139  1.246E+01  0.000E+00  0.000E+00  0.000E+00  1.104E+06  1.443E+00  0.000E+00   0.0E+00
   16   17  5.539E+04  0.000E+00  0.000E+00  0.000E+00  5.141E-10  0.000E+00  0.000E+00   0.0E+00
   16   18  2.102E+04  2.051E+00  8.152E-08  2.820E-05  0.000E+00  0.000E+00  9.063E-12   2.6E+04
   16   19  5.921E+03  1.695E+02  8.908E-07  8.682E-05  0.000E+00  0.000E+00  3.399E-09   4.9E+02
   16   20  3.544E+03  0.000E+00  0.000E+00  0.000E+00  8.601E-05  6.330E+01  0.000E+00   0.0E+00
   16   21  2.574E+03  0.000E+00  0.000E+00  0.000E+00  0.000E+00  0.000E+00  8.302E-06   0.0E+00
   16   22  1.707E+03  0.000E+00  0.000E+00  0.000E+00  8.567E-02  1.384E+03  0.000E+00   0.0E+00
   16   23  6.080E+02  0.000E+00  0.000E+00  0.000E+00  3.294E-01  1.985E+04  0.000E+00   0.0E+00
   16   24  1.616E+02  0.000E+00  0.000E+00  0.000E+00  2.863E+02  6.873E+05  0.000E+00   0.0E+00
   16   25  1.530E+02  0.000E+00  0.000E+00  0.000E+00  1.664E+01  6.777E+05  0.000E+00   0.0E+00
   16   26  1.498E+02  0.000E+00  0.000E+00  0.000E+00  5.484E+01  1.378E+05  0.000E+00   0.0E+00
   16   27  1.377E+02  0.000E+00  0.000E+00  0.000E+00  7.388E+02  1.280E+06  0.000E+00   0.0E+00
   16   28  9.775E+01  7.488E+06  6.436E-06  1.036E-05  0.000E+00  0.000E+00  6.312E-02   1.7E-01
   16   29  8.939E+01  0.000E+00  0.000E+00  0.000E+00  0.000E+00  0.000E+00  8.724E+00   0.0E+00
   16   30  6.660E+01  0.000E+00  0.000E+00  0.000E+00  4.683E+00  0.000E+00  0.000E+00   0.0E+00
   16   31  6.619E+01  0.000E+00  0.000E+00  0.000E+00  3.516E+02  4.283E+03  0.000E+00   0.0E+00
   16   32  6.025E+01  0.000E+00  0.000E+00  0.000E+00  1.042E+02  6.395E+03  0.000E+00   0.0E+00
   16   33  5.940E+01  0.000E+00  0.000E+00  0.000E+00  2.116E+02  7.472E+02  0.000E+00   0.0E+00
   16   34  4.435E+01  7.876E+10  1.394E-02  1.017E-02  0.000E+00  0.000E+00  2.854E+03   6.1E-01
   16   35  4.418E+01  6.649E+10  1.946E-02  1.415E-02  0.000E+00  0.000E+00  2.647E+03   6.0E-01
   16   36  4.374E+01  6.334E+09  2.543E-03  1.831E-03  0.000E+00  0.000E+00  3.190E+03   6.2E-01
   16   37  4.243E+01  4.535E+09  1.224E-03  8.549E-04  0.000E+00  0.000E+00  2.758E+03   6.1E-01
   16   38  2.220E+01  0.000E+00  0.000E+00  0.000E+00  1.988E+08  4.053E+00  0.000E+00   0.0E+00
   16   39  2.216E+01  0.000E+00  0.000E+00  0.000E+00  1.874E+06  4.985E+01  0.000E+00   0.0E+00
   16   40  2.128E+01  1.956E+11  7.971E-03  2.792E-03  0.000E+00  0.000E+00  4.865E+03   1.0E+00
   16   41  2.125E+01  1.169E+11  7.915E-03  2.769E-03  0.000E+00  0.000E+00  7.406E+03   1.0E+00
   16   42  2.100E+01  1.108E+10  1.025E-03  3.543E-04  0.000E+00  0.000E+00  3.517E+03   1.0E+00
   16   43  2.099E+01  2.310E+10  9.152E-04  3.162E-04  0.000E+00  0.000E+00  7.710E+01   1.0E+00
   16   44  2.093E+01  1.195E+11  7.845E-03  2.702E-03  0.000E+00  0.000E+00  2.324E+04   1.0E+00
   16   45  2.065E+01  0.000E+00  0.000E+00  0.000E+00  0.000E+00  0.000E+00  4.786E+04   0.0E+00
   16   46  2.008E+01  0.000E+00  0.000E+00  0.000E+00  8.998E+08  0.000E+00  0.000E+00   0.0E+00
   16   47  2.005E+01  0.000E+00  0.000E+00  0.000E+00  2.193E+08  2.021E+01  0.000E+00   0.0E+00
   16   48  2.000E+01  0.000E+00  0.000E+00  0.000E+00  1.156E+08  3.450E+03  0.000E+00   0.0E+00
   16   49  1.999E+01  0.000E+00  0.000E+00  0.000E+00  4.932E+07  2.127E+04  0.000E+00   0.0E+00
   16   50  1.998E+01  0.000E+00  0.000E+00  0.000E+00  6.895E+07  0.000E+00  0.000E+00   0.0E+00
   16   51  1.994E+01  0.000E+00  0.000E+00  0.000E+00  1.470E+05  9.888E+01  0.000E+00   0.0E+00
   16   52  1.990E+01  0.000E+00  0.000E+00  0.000E+00  2.012E+08  2.080E+04  0.000E+00   0.0E+00
   16   53  1.974E+01  0.000E+00  0.000E+00  0.000E+00  1.026E+06  6.884E+03  0.000E+00   0.0E+00
   16   54  1.949E+01  8.243E+11  2.817E-02  9.037E-03  0.000E+00  0.000E+00  1.800E+05   9.9E-01
   16   55  1.948E+01  0.000E+00  0.000E+00  0.000E+00  0.000E+00  0.000E+00  1.291E+05   0.0E+00
   16   56  1.947E+01  4.582E+12  2.604E-01  8.344E-02  0.000E+00  0.000E+00  1.464E+06   9.9E-01
   16   58  1.945E+01  6.729E+12  5.341E-01  1.710E-01  0.000E+00  0.000E+00  4.674E+05   9.9E-01
   16   59  1.944E+01  2.412E+11  1.366E-02  4.372E-03  0.000E+00  0.000E+00  5.437E+05   1.0E+00
   16   60  1.943E+01  1.434E+12  1.137E-01  3.636E-02  0.000E+00  0.000E+00  1.637E+06   9.9E-01
   16   61  1.945E+01  0.000E+00  0.000E+00  0.000E+00  1.590E+06  0.000E+00  0.000E+00   0.0E+00
   16   62  1.942E+01  0.000E+00  0.000E+00  0.000E+00  0.000E+00  0.000E+00  2.225E+04   0.0E+00
   16   63  1.943E+01  0.000E+00  0.000E+00  0.000E+00  1.118E+05  5.819E+01  0.000E+00   0.0E+00
   16   64  1.874E+01  3.691E+07  1.166E-06  3.596E-07  0.000E+00  0.000E+00  3.431E+01   2.5E+00
   16   65  1.855E+01  0.000E+00  0.000E+00  0.000E+00  0.000E+00  0.000E+00  2.914E+02   0.0E+00
   16   66  1.851E+01  1.314E+09  4.051E-05  1.234E-05  0.000E+00  0.000E+00  4.003E+02   1.5E+00
   16   67  1.850E+01  3.532E+08  1.812E-05  5.517E-06  0.000E+00  0.000E+00  2.998E+02   1.5E+00
   16   68  1.775E+01  0.000E+00  0.000E+00  0.000E+00  5.717E+05  1.996E+02  0.000E+00   0.0E+00
   16   69  1.771E+01  0.000E+00  0.000E+00  0.000E+00  3.715E+06  1.638E+02  0.000E+00   0.0E+00
   16   70  1.769E+01  0.000E+00  0.000E+00  0.000E+00  8.508E+05  3.561E-01  0.000E+00   0.0E+00
   16   71  1.764E+01  0.000E+00  0.000E+00  0.000E+00  4.259E+05  1.580E+03  0.000E+00   0.0E+00
   16   72  1.732E+01  6.987E+08  4.400E-05  1.254E-05  0.000E+00  0.000E+00  2.556E+02   1.0E+00
   16   73  1.731E+01  1.989E+09  8.937E-05  2.547E-05  0.000E+00  0.000E+00  4.189E+02   8.5E-01
   16   74  1.730E+01  0.000E+00  0.000E+00  0.000E+00  0.000E+00  0.000E+00  4.742E+03   0.0E+00
   16   75  1.730E+01  4.702E+10  2.954E-03  8.410E-04  0.000E+00  0.000E+00  2.723E+04   9.7E-01
   16   76  1.477E+01  2.999E+09  5.882E-05  1.430E-05  0.000E+00  0.000E+00  4.183E+02   1.1E+00
   16   77  1.469E+01  0.000E+00  0.000E+00  0.000E+00  0.000E+00  0.000E+00  7.147E+01   0.0E+00
   16   78  1.434E+01  0.000E+00  0.000E+00  0.000E+00  3.663E+06  0.000E+00  0.000E+00   0.0E+00
   16   79  1.434E+01  0.000E+00  0.000E+00  0.000E+00  1.870E+06  2.278E+03  0.000E+00   0.0E+00
   16   80  1.423E+01  0.000E+00  0.000E+00  0.000E+00  5.912E+07  3.161E+02  0.000E+00   0.0E+00
   16   81  1.419E+01  0.000E+00  0.000E+00  0.000E+00  1.209E+05  2.097E+01  0.000E+00   0.0E+00
   16   82  1.416E+01  0.000E+00  0.000E+00  0.000E+00  8.651E+05  2.772E+02  0.000E+00   0.0E+00
   16   83  1.415E+01  0.000E+00  0.000E+00  0.000E+00  5.111E+07  2.306E+02  0.000E+00   0.0E+00
   16   84  1.398E+01  7.526E+10  1.323E-03  3.046E-04  0.000E+00  0.000E+00  4.133E+03   1.0E+00
   16   85  1.398E+01  4.942E+10  1.448E-03  3.333E-04  0.000E+00  0.000E+00  7.308E+03   1.0E+00
   16   86  1.393E+01  4.354E+09  1.772E-04  4.062E-05  0.000E+00  0.000E+00  2.780E+03   1.1E+00
   16   87  1.392E+01  1.131E+10  1.971E-04  4.517E-05  0.000E+00  0.000E+00  1.024E+02   1.1E+00
   16   88  1.391E+01  5.131E+10  1.488E-03  3.407E-04  0.000E+00  0.000E+00  2.136E+04   1.1E+00
   16   89  1.385E+01  0.000E+00  0.000E+00  0.000E+00  0.000E+00  0.000E+00  4.393E+04   0.0E+00
   16   90  1.377E+01  6.687E+09  1.141E-04  2.588E-05  0.000E+00  0.000E+00  4.641E+03   1.2E+00
   16   91  1.376E+01  2.570E+10  7.298E-04  1.653E-04  0.000E+00  0.000E+00  2.369E+04   8.5E-01
   16   92  1.374E+01  1.838E+10  7.283E-04  1.648E-04  0.000E+00  0.000E+00  1.579E+04   8.3E-01
   16   93  1.372E+01  0.000E+00  0.000E+00  0.000E+00  4.082E+08  0.000E+00  0.000E+00   0.0E+00
   16   94  1.371E+01  0.000E+00  0.000E+00  0.000E+00  1.047E+08  5.788E+01  0.000E+00   0.0E+00
   16   95  1.370E+01  0.000E+00  0.000E+00  0.000E+00  5.043E+07  3.283E+03  0.000E+00   0.0E+00
   16   96  1.370E+01  0.000E+00  0.000E+00  0.000E+00  2.317E+07  1.919E+04  0.000E+00   0.0E+00
   16   97  1.369E+01  0.000E+00  0.000E+00  0.000E+00  3.646E+07  0.000E+00  0.000E+00   0.0E+00
   16   98  1.369E+01  0.000E+00  0.000E+00  0.000E+00  7.998E+04  5.387E+02  0.000E+00   0.0E+00
   16   99  1.370E+01  3.459E+09  9.730E-05  2.194E-05  0.000E+00  0.000E+00  1.057E+04   9.1E-01
   16  100  1.368E+01  0.000E+00  0.000E+00  0.000E+00  9.427E+07  1.550E+04  0.000E+00   0.0E+00
   16  101  1.364E+01  0.000E+00  0.000E+00  0.000E+00  6.103E+05  5.939E+03  0.000E+00   0.0E+00
   16  102  1.359E+01  0.000E+00  0.000E+00  0.000E+00  9.959E+08  2.982E+02  0.000E+00   0.0E+00
   16  103  1.359E+01  0.000E+00  0.000E+00  0.000E+00  1.803E+09  1.186E+02  0.000E+00   0.0E+00
   16  104  1.358E+01  0.000E+00  0.000E+00  0.000E+00  0.000E+00  0.000E+00  9.583E+04   0.0E+00
   16  105  1.358E+01  2.802E+11  4.646E-03  1.038E-03  0.000E+00  0.000E+00  1.270E+05   1.0E+00
   16  107  1.357E+01  1.679E+12  4.637E-02  1.036E-02  0.000E+00  0.000E+00  6.733E+05   9.8E-01
   16  108  1.357E+01  1.656E+12  6.399E-02  1.429E-02  0.000E+00  0.000E+00  6.577E+04   1.0E+00
   16  109  1.357E+01  0.000E+00  0.000E+00  0.000E+00  1.459E+09  1.531E+02  0.000E+00   0.0E+00
   16  110  1.357E+01  1.925E+09  5.312E-05  1.186E-05  0.000E+00  0.000E+00  7.701E+05   9.4E-01
   16  111  1.357E+01  0.000E+00  0.000E+00  0.000E+00  3.216E+09  0.000E+00  0.000E+00   0.0E+00
   16  112  1.356E+01  1.223E+12  4.723E-02  1.055E-02  0.000E+00  0.000E+00  1.466E+06   1.0E+00
   16  113  1.356E+01  0.000E+00  0.000E+00  0.000E+00  0.000E+00  0.000E+00  1.521E+04   0.0E+00
   16  116  1.355E+01  0.000E+00  0.000E+00  0.000E+00  1.221E+09  0.000E+00  0.000E+00   0.0E+00
   16  118  1.349E+01  0.000E+00  0.000E+00  0.000E+00  4.216E+08  3.048E+01  0.000E+00   0.0E+00
   16  119  1.349E+01  0.000E+00  0.000E+00  0.000E+00  3.260E+08  0.000E+00  0.000E+00   0.0E+00
   16  120  1.348E+01  0.000E+00  0.000E+00  0.000E+00  2.465E+08  1.213E+02  0.000E+00   0.0E+00
   16  121  1.347E+01  0.000E+00  0.000E+00  0.000E+00  1.847E+08  4.783E+01  0.000E+00   0.0E+00
   16  122  1.300E+01  0.000E+00  0.000E+00  0.000E+00  1.029E+06  0.000E+00  0.000E+00   0.0E+00
   16  123  1.300E+01  0.000E+00  0.000E+00  0.000E+00  1.326E+05  5.948E+00  0.000E+00   0.0E+00
   16  124  1.284E+01  1.902E+06  2.820E-08  5.960E-09  0.000E+00  0.000E+00  4.483E+01   2.1E+00
   16  125  1.280E+01  0.000E+00  0.000E+00  0.000E+00  0.000E+00  0.000E+00  3.051E+00   0.0E+00
   16  126  1.278E+01  4.447E+08  6.539E-06  1.376E-06  0.000E+00  0.000E+00  2.093E+02   2.6E+00
   16  127  1.278E+01  4.025E+07  9.860E-07  2.075E-07  0.000E+00  0.000E+00  9.588E+01   3.0E+00
   16  128  1.260E+01  0.000E+00  0.000E+00  0.000E+00  2.215E+05  1.042E+02  0.000E+00   0.0E+00
   16  129  1.259E+01  0.000E+00  0.000E+00  0.000E+00  1.485E+06  2.789E+02  0.000E+00   0.0E+00
   16  130  1.259E+01  0.000E+00  0.000E+00  0.000E+00  2.714E+05  3.709E-02  0.000E+00   0.0E+00
   16  131  1.258E+01  0.000E+00  0.000E+00  0.000E+00  2.873E+05  6.317E+02  0.000E+00   0.0E+00
   16  132  1.249E+01  2.758E+08  9.037E-06  1.859E-06  0.000E+00  0.000E+00  1.893E+02   1.1E+00
   16  133  1.249E+01  1.003E+09  2.347E-05  4.826E-06  0.000E+00  0.000E+00  4.060E+02   8.5E-01
   16  134  1.249E+01  0.000E+00  0.000E+00  0.000E+00  0.000E+00  0.000E+00  3.594E+03   0.0E+00
   16  135  1.249E+01  2.016E+10  6.600E-04  1.357E-04  0.000E+00  0.000E+00  2.124E+04   9.8E-01
   16  136  1.248E+01  0.000E+00  0.000E+00  0.000E+00  1.440E+06  0.000E+00  0.000E+00   0.0E+00
   16  137  1.248E+01  0.000E+00  0.000E+00  0.000E+00  2.356E+06  8.778E+00  0.000E+00   0.0E+00
   16  139  1.247E+01  0.000E+00  0.000E+00  0.000E+00  3.436E+07  0.000E+00  0.000E+00   0.0E+00
   17   19  6.629E+03  0.000E+00  0.000E+00  0.000E+00  0.000E+00  0.000E+00  6.917E-12   0.0E+00
   17   20  3.786E+03  0.000E+00  0.000E+00  0.000E+00  8.586E-05  0.000E+00  0.000E+00   0.0E+00
   17   22  1.762E+03  0.000E+00  0.000E+00  0.000E+00  1.228E-01  7.961E+01  0.000E+00   0.0E+00
   17   24  1.621E+02  0.000E+00  0.000E+00  0.000E+00  1.516E+00  0.000E+00  0.000E+00   0.0E+00
   17   25  1.534E+02  0.000E+00  0.000E+00  0.000E+00  2.414E+03  0.000E+00  0.000E+00   0.0E+00
   17   26  1.502E+02  0.000E+00  0.000E+00  0.000E+00  1.140E+03  3.096E+06  0.000E+00   0.0E+00
   17   32  6.031E+01  0.000E+00  0.000E+00  0.000E+00  4.247E+03  0.000E+00  0.000E+00   0.0E+00
   17   35  4.421E+01  0.000E+00  0.000E+00  0.000E+00  0.000E+00  0.000E+00  2.376E+03   0.0E+00
   17   36  4.377E+01  2.291E+11  5.120E-02  6.640E-02  0.000E+00  0.000E+00  4.231E+03   6.3E-01
   17   37  4.246E+01  0.000E+00  0.000E+00  0.000E+00  0.000E+00  0.000E+00  1.156E+04   0.0E+00
   17   38  2.221E+01  0.000E+00  0.000E+00  0.000E+00  3.635E+08  0.000E+00  0.000E+00   0.0E+00
   17   41  2.126E+01  0.000E+00  0.000E+00  0.000E+00  0.000E+00  0.000E+00  4.176E+04   0.0E+00
   17   42  2.100E+01  4.301E+11  2.212E-02  1.377E-02  0.000E+00  0.000E+00  1.042E+05   1.1E+00
   17   44  2.094E+01  0.000E+00  0.000E+00  0.000E+00  0.000E+00  0.000E+00  5.265E+04   0.0E+00
   17   48  2.001E+01  0.000E+00  0.000E+00  0.000E+00  1.842E+08  4.480E+04  0.000E+00   0.0E+00
   17   49  1.999E+01  0.000E+00  0.000E+00  0.000E+00  1.343E+08  0.000E+00  0.000E+00   0.0E+00
   17   50  1.999E+01  0.000E+00  0.000E+00  0.000E+00  5.244E+08  4.414E+04  0.000E+00   0.0E+00
   17   51  1.995E+01  0.000E+00  0.000E+00  0.000E+00  1.303E+06  0.000E+00  0.000E+00   0.0E+00
   17   52  1.990E+01  0.000E+00  0.000E+00  0.000E+00  2.404E+08  8.026E+03  0.000E+00   0.0E+00
   17   55  1.949E+01  5.258E+11  2.993E-02  1.728E-02  0.000E+00  0.000E+00  1.882E+04   1.0E+00
   17   56  1.948E+01  0.000E+00  0.000E+00  0.000E+00  0.000E+00  0.000E+00  7.379E+03   0.0E+00
   17   57  1.947E+01  1.181E+13  8.201E-01  4.731E-01  0.000E+00  0.000E+00  5.728E+06   1.0E+00
   17   58  1.945E+01  1.611E+11  7.110E-03  4.098E-03  0.000E+00  0.000E+00  2.328E+04   1.0E+00
   17   59  1.944E+01  0.000E+00  0.000E+00  0.000E+00  0.000E+00  0.000E+00  9.844E+03   0.0E+00
   17   60  1.944E+01  2.498E+10  1.101E-03  6.341E-04  0.000E+00  0.000E+00  2.674E+05   1.0E+00
   17   62  1.943E+01  1.481E+12  8.377E-02  4.822E-02  0.000E+00  0.000E+00  1.905E+06   9.9E-01
   17   67  1.850E+01  0.000E+00  0.000E+00  0.000E+00  0.000E+00  0.000E+00  3.934E+01   0.0E+00
   17   68  1.776E+01  0.000E+00  0.000E+00  0.000E+00  7.662E+02  0.000E+00  0.000E+00   0.0E+00
   17   69  1.771E+01  0.000E+00  0.000E+00  0.000E+00  2.003E+04  0.000E+00  0.000E+00   0.0E+00
   17   70  1.770E+01  0.000E+00  0.000E+00  0.000E+00  2.498E+04  1.478E+02  0.000E+00   0.0E+00
   17   72  1.733E+01  2.814E+07  9.850E-07  5.057E-07  0.000E+00  0.000E+00  2.037E+01   9.4E-01
   17   73  1.732E+01  0.000E+00  0.000E+00  0.000E+00  0.000E+00  0.000E+00  1.776E+00   0.0E+00
   17   74  1.731E+01  4.572E+08  2.053E-05  1.053E-05  0.000E+00  0.000E+00  1.269E+02   6.9E-01
   17   75  1.730E+01  1.057E+08  3.689E-06  1.892E-06  0.000E+00  0.000E+00  3.775E+02   2.0E+00
   17   80  1.424E+01  0.000E+00  0.000E+00  0.000E+00  9.346E+07  0.000E+00  0.000E+00   0.0E+00
   17   83  1.416E+01  0.000E+00  0.000E+00  0.000E+00  1.032E+08  0.000E+00  0.000E+00   0.0E+00
   17   85  1.398E+01  0.000E+00  0.000E+00  0.000E+00  0.000E+00  0.000E+00  3.940E+04   0.0E+00
   17   86  1.393E+01  1.761E+11  3.984E-03  1.644E-03  0.000E+00  0.000E+00  9.424E+04   1.1E+00
   17   88  1.391E+01  0.000E+00  0.000E+00  0.000E+00  0.000E+00  0.000E+00  4.691E+04   0.0E+00
   17   91  1.377E+01  0.000E+00  0.000E+00  0.000E+00  0.000E+00  0.000E+00  1.872E-03   0.0E+00
   17   92  1.374E+01  1.391E+09  3.065E-05  1.248E-05  0.000E+00  0.000E+00  3.795E+03   4.6E+00
   17   95  1.371E+01  0.000E+00  0.000E+00  0.000E+00  8.676E+07  3.281E+04  0.000E+00   0.0E+00
   17   96  1.370E+01  0.000E+00  0.000E+00  0.000E+00  5.757E+07  0.000E+00  0.000E+00   0.0E+00
   17   97  1.370E+01  0.000E+00  0.000E+00  0.000E+00  2.470E+08  4.604E+04  0.000E+00   0.0E+00
   17   98  1.369E+01  0.000E+00  0.000E+00  0.000E+00  9.778E+05  0.000E+00  0.000E+00   0.0E+00
   17   99  1.370E+01  0.000E+00  0.000E+00  0.000E+00  0.000E+00  0.000E+00  5.499E+01   0.0E+00
   17  100  1.368E+01  0.000E+00  0.000E+00  0.000E+00  1.218E+08  8.463E+03  0.000E+00   0.0E+00
   17  102  1.360E+01  0.000E+00  0.000E+00  0.000E+00  1.497E+06  0.000E+00  0.000E+00   0.0E+00
   17  103  1.359E+01  0.000E+00  0.000E+00  0.000E+00  1.915E+07  4.003E+02  0.000E+00   0.0E+00
   17  104  1.358E+01  1.950E+11  5.392E-03  2.170E-03  0.000E+00  0.000E+00  9.751E+03   9.9E-01
   17  106  1.358E+01  4.132E+12  1.395E-01  5.613E-02  0.000E+00  0.000E+00  4.185E+06   1.0E+00
   17  107  1.357E+01  0.000E+00  0.000E+00  0.000E+00  0.000E+00  0.000E+00  2.662E+03   0.0E+00
   17  108  1.357E+01  4.112E+10  8.833E-04  3.552E-04  0.000E+00  0.000E+00  2.524E+00   1.0E+00
   17  109  1.357E+01  0.000E+00  0.000E+00  0.000E+00  1.903E+07  5.112E+01  0.000E+00   0.0E+00
   17  110  1.357E+01  0.000E+00  0.000E+00  0.000E+00  0.000E+00  0.000E+00  9.170E+03   0.0E+00
   17  111  1.357E+01  0.000E+00  0.000E+00  0.000E+00  2.353E+08  4.644E+00  0.000E+00   0.0E+00
   17  112  1.357E+01  2.176E+10  4.672E-04  1.878E-04  0.000E+00  0.000E+00  2.051E+05   1.1E+00
   17  113  1.357E+01  5.282E+11  1.457E-02  5.858E-03  0.000E+00  0.000E+00  1.422E+06   9.7E-01
   17  114  1.356E+01  0.000E+00  0.000E+00  0.000E+00  5.233E+08  8.510E+02  0.000E+00   0.0E+00
   17  115  1.356E+01  0.000E+00  0.000E+00  0.000E+00  8.505E+09  0.000E+00  0.000E+00   0.0E+00
   17  116  1.356E+01  0.000E+00  0.000E+00  0.000E+00  1.310E+08  1.173E+02  0.000E+00   0.0E+00
   17  117  1.355E+01  0.000E+00  0.000E+00  0.000E+00  1.592E+09  2.572E+01  0.000E+00   0.0E+00
   17  118  1.350E+01  0.000E+00  0.000E+00  0.000E+00  4.733E+06  1.565E+02  0.000E+00   0.0E+00
   17  119  1.349E+01  0.000E+00  0.000E+00  0.000E+00  2.754E+07  7.413E+00  0.000E+00   0.0E+00
   17  120  1.348E+01  0.000E+00  0.000E+00  0.000E+00  3.309E+05  0.000E+00  0.000E+00   0.0E+00
   17  121  1.347E+01  0.000E+00  0.000E+00  0.000E+00  1.785E+06  5.262E+02  0.000E+00   0.0E+00
   17  127  1.279E+01  0.000E+00  0.000E+00  0.000E+00  0.000E+00  0.000E+00  6.354E+01   0.0E+00
   17  128  1.261E+01  0.000E+00  0.000E+00  0.000E+00  4.832E+03  0.000E+00  0.000E+00   0.0E+00
   17  129  1.260E+01  0.000E+00  0.000E+00  0.000E+00  5.504E+05  0.000E+00  0.000E+00   0.0E+00
   17  130  1.259E+01  0.000E+00  0.000E+00  0.000E+00  5.230E+04  1.243E+01  0.000E+00   0.0E+00
   17  132  1.250E+01  5.982E+06  1.090E-07  4.035E-08  0.000E+00  0.000E+00  4.075E+01   2.3E+00
   17  133  1.249E+01  0.000E+00  0.000E+00  0.000E+00  0.000E+00  0.000E+00  7.004E+01   0.0E+00
   17  134  1.249E+01  2.993E+08  7.002E-06  2.592E-06  0.000E+00  0.000E+00  1.268E+02   4.5E-01
   17  135  1.249E+01  4.338E+07  7.894E-07  2.922E-07  0.000E+00  0.000E+00  1.335E+03   3.9E+00
   17  136  1.248E+01  0.000E+00  0.000E+00  0.000E+00  4.686E+02  1.985E-03  0.000E+00   0.0E+00
   17  137  1.248E+01  0.000E+00  0.000E+00  0.000E+00  1.078E+04  2.672E+00  0.000E+00   0.0E+00
   17  138  1.248E+01  0.000E+00  0.000E+00  0.000E+00  6.541E+01  2.794E+00  0.000E+00   0.0E+00
   17  139  1.248E+01  0.000E+00  0.000E+00  0.000E+00  9.224E+04  4.548E+00  0.000E+00   0.0E+00
   18   19  8.242E+03  0.000E+00  0.000E+00  0.000E+00  5.009E-05  8.687E+00  0.000E+00   0.0E+00
   18   20  4.262E+03  2.142E+01  9.723E-08  4.093E-06  0.000E+00  0.000E+00  1.020E-10   1.1E+03
   18   21  2.933E+03  0.000E+00  0.000E+00  0.000E+00  0.000E+00  3.947E+02  0.000E+00   0.0E+00
   18   22  1.858E+03  0.000E+00  0.000E+00  0.000E+00  0.000E+00  0.000E+00  3.909E-07   0.0E+00
   18   23  6.261E+02  2.656E+05  1.561E-05  9.653E-05  0.000E+00  0.000E+00  1.133E-03   5.6E+01
   18   24  1.629E+02  3.557E+08  2.357E-03  3.791E-03  0.000E+00  0.000E+00  1.078E-03   1.0E+00
   18   25  1.541E+02  2.038E+10  1.209E-01  1.841E-01  0.000E+00  0.000E+00  9.885E+01   1.1E+00
   18   26  1.509E+02  0.000E+00  0.000E+00  0.000E+00  0.000E+00  0.000E+00  2.263E+01   0.0E+00
   18   27  1.386E+02  4.626E+09  1.333E-02  1.824E-02  0.000E+00  0.000E+00  1.473E-01   7.9E-01
   18   28  9.821E+01  0.000E+00  0.000E+00  0.000E+00  3.912E+02  1.019E+04  0.000E+00   0.0E+00
   18   29  8.978E+01  0.000E+00  0.000E+00  0.000E+00  0.000E+00  3.153E+03  0.000E+00   0.0E+00
   18   30  6.681E+01  8.157E+08  1.819E-04  1.200E-04  0.000E+00  0.000E+00  0.000E+00   1.6E+00
   18   31  6.640E+01  9.657E+08  6.383E-04  4.185E-04  0.000E+00  0.000E+00  1.227E+01   7.5E-01
   18   32  6.042E+01  2.196E+10  2.003E-02  1.195E-02  0.000E+00  0.000E+00  4.474E-01   4.6E-01
   18   33  5.957E+01  1.794E+10  9.543E-03  5.615E-03  0.000E+00  0.000E+00  4.402E+01   5.3E-01
   18   34  4.445E+01  0.000E+00  0.000E+00  0.000E+00  2.315E+04  1.733E+02  0.000E+00   0.0E+00
   18   35  4.427E+01  0.000E+00  0.000E+00  0.000E+00  8.562E+04  7.216E+00  0.000E+00   0.0E+00
   18   36  4.383E+01  0.000E+00  0.000E+00  0.000E+00  2.669E+05  0.000E+00  0.000E+00   0.0E+00
   18   37  4.252E+01  0.000E+00  0.000E+00  0.000E+00  2.655E+03  6.308E+02  0.000E+00   0.0E+00
   18   38  2.223E+01  3.082E+09  3.804E-04  8.351E-05  0.000E+00  0.000E+00  4.061E+02   7.7E-01
   18   39  2.218E+01  1.081E+08  7.973E-06  1.746E-06  0.000E+00  0.000E+00  2.646E+02   1.7E+00
   18   40  2.130E+01  0.000E+00  0.000E+00  0.000E+00  1.725E+03  1.085E+03  0.000E+00   0.0E+00
   18   41  2.127E+01  0.000E+00  0.000E+00  0.000E+00  1.186E+06  2.830E+02  0.000E+00   0.0E+00
   18   42  2.102E+01  0.000E+00  0.000E+00  0.000E+00  3.358E+06  0.000E+00  0.000E+00   0.0E+00
   18   43  2.101E+01  0.000E+00  0.000E+00  0.000E+00  2.359E+05  6.979E+02  0.000E+00   0.0E+00
   18   44  2.095E+01  0.000E+00  0.000E+00  0.000E+00  5.876E+00  6.974E+02  0.000E+00   0.0E+00
   18   45  2.067E+01  0.000E+00  0.000E+00  0.000E+00  0.000E+00  2.935E+04  0.000E+00   0.0E+00
   18   46  2.010E+01  1.866E+10  3.767E-04  7.478E-05  0.000E+00  0.000E+00  0.000E+00   9.0E-01
   18   47  2.006E+01  1.343E+10  8.106E-04  1.606E-04  0.000E+00  0.000E+00  5.810E+02   9.1E-01
   18   48  2.002E+01  0.000E+00  0.000E+00  0.000E+00  0.000E+00  0.000E+00  3.400E+02   0.0E+00
   18   49  2.000E+01  8.462E+08  8.460E-05  1.671E-05  0.000E+00  0.000E+00  4.219E+02   1.3E+00
   18   51  1.996E+01  1.672E+09  1.665E-04  3.282E-05  0.000E+00  0.000E+00  1.616E+02   1.1E+00
   18   52  1.992E+01  0.000E+00  0.000E+00  0.000E+00  0.000E+00  0.000E+00  1.044E+03   0.0E+00
   18   53  1.976E+01  1.167E+10  6.829E-04  1.332E-04  0.000E+00  0.000E+00  8.341E+01   7.7E-01
   18   54  1.951E+01  0.000E+00  0.000E+00  0.000E+00  2.526E+07  1.163E+00  0.000E+00   0.0E+00
   18   56  1.949E+01  0.000E+00  0.000E+00  0.000E+00  1.577E+07  2.008E+01  0.000E+00   0.0E+00
   18   58  1.946E+01  0.000E+00  0.000E+00  0.000E+00  1.143E+06  0.000E+00  0.000E+00   0.0E+00
   18   59  1.946E+01  0.000E+00  0.000E+00  0.000E+00  4.532E+05  3.290E+00  0.000E+00   0.0E+00
   18   60  1.945E+01  0.000E+00  0.000E+00  0.000E+00  4.238E+06  0.000E+00  0.000E+00   0.0E+00
   18   61  1.947E+01  2.036E+12  3.857E-02  7.418E-03  0.000E+00  0.000E+00  0.000E+00   1.0E+00
   18   63  1.945E+01  3.153E+11  1.788E-02  3.434E-03  0.000E+00  0.000E+00  2.901E+05   1.0E+00
   18   64  1.875E+01  0.000E+00  0.000E+00  0.000E+00  1.207E+09  1.668E+05  0.000E+00   0.0E+00
   18   65  1.857E+01  0.000E+00  0.000E+00  0.000E+00  0.000E+00  9.595E+05  0.000E+00   0.0E+00
   18   66  1.853E+01  0.000E+00  0.000E+00  0.000E+00  6.030E+08  3.418E+04  0.000E+00   0.0E+00
   18   67  1.851E+01  0.000E+00  0.000E+00  0.000E+00  3.530E+08  6.419E+03  0.000E+00   0.0E+00
   18   68  1.777E+01  1.032E+11  8.141E-03  1.429E-03  0.000E+00  0.000E+00  1.545E+01   1.0E+00
   18   69  1.772E+01  5.108E+12  4.008E-01  7.015E-02  0.000E+00  0.000E+00  1.804E+06   9.9E-01
   18   70  1.770E+01  0.000E+00  0.000E+00  0.000E+00  0.000E+00  0.000E+00  3.697E+05   0.0E+00
   18   71  1.766E+01  7.732E+11  3.615E-02  6.304E-03  0.000E+00  0.000E+00  3.243E+01   1.0E+00
   18   72  1.733E+01  0.000E+00  0.000E+00  0.000E+00  2.998E+08  0.000E+00  0.000E+00   0.0E+00
   18   73  1.733E+01  0.000E+00  0.000E+00  0.000E+00  1.147E+09  2.013E+03  0.000E+00   0.0E+00
   18   75  1.731E+01  0.000E+00  0.000E+00  0.000E+00  6.318E+09  0.000E+00  0.000E+00   0.0E+00
   18   76  1.478E+01  0.000E+00  0.000E+00  0.000E+00  1.014E+03  1.468E+02  0.000E+00   0.0E+00
   18   77  1.470E+01  0.000E+00  0.000E+00  0.000E+00  0.000E+00  1.087E+03  0.000E+00   0.0E+00
   18   78  1.435E+01  1.908E+10  1.964E-04  2.784E-05  0.000E+00  0.000E+00  0.000E+00   8.3E-01
   18   79  1.435E+01  6.022E+09  1.859E-04  2.635E-05  0.000E+00  0.000E+00  2.529E+01   1.2E+00
   18   80  1.424E+01  8.322E+08  4.219E-05  5.935E-06  0.000E+00  0.000E+00  3.825E+01   2.0E+00
   18   81  1.420E+01  3.959E+09  1.198E-04  1.680E-05  0.000E+00  0.000E+00  3.775E+03   1.2E+00
   18   82  1.417E+01  3.569E+06  1.075E-07  1.505E-08  0.000E+00  0.000E+00  2.154E+03   1.1E+00
   18   83  1.416E+01  6.909E+09  3.464E-04  4.846E-05  0.000E+00  0.000E+00  1.626E+03   9.9E-01
   18   84  1.399E+01  0.000E+00  0.000E+00  0.000E+00  3.447E+04  8.215E+02  0.000E+00   0.0E+00
   18   85  1.399E+01  0.000E+00  0.000E+00  0.000E+00  3.388E+05  2.049E+02  0.000E+00   0.0E+00
   18   86  1.394E+01  0.000E+00  0.000E+00  0.000E+00  2.938E+05  0.000E+00  0.000E+00   0.0E+00
   18   87  1.393E+01  0.000E+00  0.000E+00  0.000E+00  5.559E+04  2.122E+02  0.000E+00   0.0E+00
   18   88  1.392E+01  0.000E+00  0.000E+00  0.000E+00  1.411E+04  7.475E+02  0.000E+00   0.0E+00
   18   89  1.386E+01  0.000E+00  0.000E+00  0.000E+00  0.000E+00  4.131E+03  0.000E+00   0.0E+00
   18   90  1.378E+01  0.000E+00  0.000E+00  0.000E+00  3.408E+07  9.455E+01  0.000E+00   0.0E+00
   18   91  1.377E+01  0.000E+00  0.000E+00  0.000E+00  2.695E+07  1.170E-02  0.000E+00   0.0E+00
   18   92  1.375E+01  0.000E+00  0.000E+00  0.000E+00  3.072E+07  0.000E+00  0.000E+00   0.0E+00
   18   93  1.373E+01  1.305E+10  1.229E-04  1.667E-05  0.000E+00  0.000E+00  0.000E+00   9.6E-01
   18   94  1.372E+01  1.121E+10  3.163E-04  4.285E-05  0.000E+00  0.000E+00  1.221E+03   8.2E-01
   18   95  1.371E+01  0.000E+00  0.000E+00  0.000E+00  0.000E+00  0.000E+00  1.419E+02   0.0E+00
   18   96  1.371E+01  2.206E+09  1.036E-04  1.402E-05  0.000E+00  0.000E+00  4.368E-03   1.1E+00
   18   98  1.370E+01  2.426E+09  1.137E-04  1.538E-05  0.000E+00  0.000E+00  8.564E+02   1.1E+00
   18   99  1.371E+01  0.000E+00  0.000E+00  0.000E+00  1.600E+06  1.473E+00  0.000E+00   0.0E+00
   18  100  1.369E+01  0.000E+00  0.000E+00  0.000E+00  0.000E+00  0.000E+00  9.686E+02   0.0E+00
   18  101  1.365E+01  1.297E+08  3.622E-06  4.882E-07  0.000E+00  0.000E+00  6.639E+03   4.0E+00
   18  102  1.360E+01  2.317E+08  1.071E-05  1.438E-06  0.000E+00  0.000E+00  1.591E+01   1.1E+00
   18  103  1.359E+01  0.000E+00  0.000E+00  0.000E+00  0.000E+00  0.000E+00  3.875E+00   0.0E+00
   18  105  1.358E+01  0.000E+00  0.000E+00  0.000E+00  1.438E+05  9.142E+00  0.000E+00   0.0E+00
   18  107  1.358E+01  0.000E+00  0.000E+00  0.000E+00  7.966E+03  8.635E+00  0.000E+00   0.0E+00
   18  108  1.358E+01  0.000E+00  0.000E+00  0.000E+00  7.036E+02  0.000E+00  0.000E+00   0.0E+00
   18  109  1.358E+01  0.000E+00  0.000E+00  0.000E+00  0.000E+00  0.000E+00  2.820E+01   0.0E+00
   18  110  1.357E+01  0.000E+00  0.000E+00  0.000E+00  1.506E+04  2.594E+00  0.000E+00   0.0E+00
   18  112  1.357E+01  0.000E+00  0.000E+00  0.000E+00  8.153E-01  0.000E+00  0.000E+00   0.0E+00
   18  118  1.350E+01  0.000E+00  0.000E+00  0.000E+00  0.000E+00  0.000E+00  6.163E+01   0.0E+00
   18  120  1.349E+01  5.632E+08  2.561E-05  3.412E-06  0.000E+00  0.000E+00  3.321E+01   1.0E+00
   18  121  1.348E+01  0.000E+00  0.000E+00  0.000E+00  0.000E+00  0.000E+00  9.849E+00   0.0E+00
   18  122  1.301E+01  9.377E+11  7.933E-03  1.019E-03  0.000E+00  0.000E+00  0.000E+00   1.0E+00
   18  123  1.301E+01  1.512E+11  3.835E-03  4.926E-04  0.000E+00  0.000E+00  2.890E+05   1.0E+00
   18  124  1.285E+01  0.000E+00  0.000E+00  0.000E+00  6.371E+08  1.290E+05  0.000E+00   0.0E+00
   18  125  1.281E+01  0.000E+00  0.000E+00  0.000E+00  0.000E+00  7.605E+05  0.000E+00   0.0E+00
   18  126  1.279E+01  0.000E+00  0.000E+00  0.000E+00  3.286E+08  4.591E+04  0.000E+00   0.0E+00
   18  127  1.279E+01  0.000E+00  0.000E+00  0.000E+00  1.926E+08  7.008E+03  0.000E+00   0.0E+00
   18  128  1.261E+01  5.464E+10  2.172E-03  2.705E-04  0.000E+00  0.000E+00  3.233E+01   1.0E+00
   18  129  1.260E+01  2.693E+12  1.068E-01  1.329E-02  0.000E+00  0.000E+00  1.889E+06   9.9E-01
   18  130  1.260E+01  0.000E+00  0.000E+00  0.000E+00  0.000E+00  0.000E+00  3.892E+05   0.0E+00
   18  131  1.259E+01  4.144E+11  9.843E-03  1.224E-03  0.000E+00  0.000E+00  7.363E+00   1.0E+00
   18  132  1.250E+01  0.000E+00  0.000E+00  0.000E+00  2.377E+07  0.000E+00  0.000E+00   0.0E+00
   18  133  1.250E+01  0.000E+00  0.000E+00  0.000E+00  9.404E+07  1.098E+03  0.000E+00   0.0E+00
   18  135  1.250E+01  0.000E+00  0.000E+00  0.000E+00  5.200E+08  0.000E+00  0.000E+00   0.0E+00
   18  137  1.248E+01  0.000E+00  0.000E+00  0.000E+00  0.000E+00  0.000E+00  6.710E+00   0.0E+00
   19   20  8.828E+03  5.860E+00  6.846E-08  9.948E-06  0.000E+00  0.000E+00  7.949E-11   8.4E+03
   19   21  4.554E+03  0.000E+00  0.000E+00  0.000E+00  5.348E-03  0.000E+00  0.000E+00   0.0E+00
   19   22  2.399E+03  1.912E+02  2.310E-07  9.125E-06  0.000E+00  0.000E+00  4.771E-11   1.3E+01
   19   23  6.776E+02  2.422E+06  1.000E-04  1.115E-03  0.000E+00  0.000E+00  1.274E-04   1.0E+00
   19   24  1.661E+02  2.697E+09  1.116E-02  3.052E-02  0.000E+00  0.000E+00  8.006E-04   1.1E+00
   19   25  1.571E+02  2.077E+09  7.681E-03  1.986E-02  0.000E+00  0.000E+00  3.870E+01   1.1E+00
   19   26  1.537E+02  2.327E+10  1.154E-01  2.918E-01  0.000E+00  0.000E+00  1.244E+02   1.0E+00
   19   27  1.410E+02  5.153E+08  9.213E-04  2.138E-03  0.000E+00  0.000E+00  6.046E-02   1.9E+00
   19   28  9.939E+01  0.000E+00  0.000E+00  0.000E+00  1.804E+03  3.653E+03  0.000E+00   0.0E+00
   19   29  9.077E+01  0.000E+00  0.000E+00  0.000E+00  6.396E+03  0.000E+00  0.000E+00   0.0E+00
   19   30  6.735E+01  0.000E+00  0.000E+00  0.000E+00  0.000E+00  0.000E+00  2.591E+01   0.0E+00
   19   31  6.693E+01  3.292E+08  1.327E-04  1.462E-04  0.000E+00  0.000E+00  3.424E+00   4.3E-02
   19   32  6.087E+01  3.238E+10  1.798E-02  1.802E-02  0.000E+00  0.000E+00  2.938E+00   4.8E-01
   19   33  6.001E+01  5.562E+10  1.802E-02  1.780E-02  0.000E+00  0.000E+00  1.991E-02   4.4E-01
   19   34  4.469E+01  0.000E+00  0.000E+00  0.000E+00  1.842E+03  3.258E-03  0.000E+00   0.0E+00
   19   35  4.451E+01  0.000E+00  0.000E+00  0.000E+00  8.134E+03  1.414E+01  0.000E+00   0.0E+00
   19   36  4.406E+01  0.000E+00  0.000E+00  0.000E+00  1.800E+04  2.663E+03  0.000E+00   0.0E+00
   19   37  4.274E+01  0.000E+00  0.000E+00  0.000E+00  2.434E+01  3.855E+02  0.000E+00   0.0E+00
   19   38  2.228E+01  8.664E+08  6.450E-05  2.366E-05  0.000E+00  0.000E+00  6.816E-01   6.4E-01
   19   39  2.224E+01  7.770E+07  3.456E-06  1.265E-06  0.000E+00  0.000E+00  4.881E+01   1.3E+00
   19   40  2.136E+01  0.000E+00  0.000E+00  0.000E+00  2.181E+05  5.498E+01  0.000E+00   0.0E+00
   19   41  2.133E+01  0.000E+00  0.000E+00  0.000E+00  1.522E+05  1.107E-01  0.000E+00   0.0E+00
   19   42  2.107E+01  0.000E+00  0.000E+00  0.000E+00  3.431E+05  3.235E+01  0.000E+00   0.0E+00
   19   43  2.106E+01  0.000E+00  0.000E+00  0.000E+00  6.303E+04  4.843E-02  0.000E+00   0.0E+00
   19   44  2.100E+01  0.000E+00  0.000E+00  0.000E+00  6.204E+05  2.920E+02  0.000E+00   0.0E+00
   19   45  2.072E+01  0.000E+00  0.000E+00  0.000E+00  1.255E+07  0.000E+00  0.000E+00   0.0E+00
   19   46  2.015E+01  0.000E+00  0.000E+00  0.000E+00  0.000E+00  0.000E+00  3.969E+02   0.0E+00
   19   47  2.011E+01  4.603E+07  1.675E-06  5.545E-07  0.000E+00  0.000E+00  2.246E+01   1.2E+00
   19   48  2.007E+01  2.512E+08  2.124E-05  7.018E-06  0.000E+00  0.000E+00  3.240E+02   1.2E+00
   19   49  2.005E+01  3.297E+09  1.988E-04  6.561E-05  0.000E+00  0.000E+00  1.093E+03   8.2E-01
   19   50  2.005E+01  0.000E+00  0.000E+00  0.000E+00  0.000E+00  0.000E+00  1.766E+02   0.0E+00
   19   51  2.001E+01  2.636E+08  1.582E-05  5.210E-06  0.000E+00  0.000E+00  5.930E+02   4.9E-01
   19   52  1.996E+01  7.108E+07  5.947E-06  1.954E-06  0.000E+00  0.000E+00  2.836E+01   7.1E-01
   19   53  1.980E+01  3.017E+10  1.064E-03  3.470E-04  0.000E+00  0.000E+00  5.807E+03   8.4E-01
   19   54  1.956E+01  0.000E+00  0.000E+00  0.000E+00  6.256E+05  1.090E+02  0.000E+00   0.0E+00
   19   55  1.954E+01  0.000E+00  0.000E+00  0.000E+00  1.701E+06  0.000E+00  0.000E+00   0.0E+00
   19   56  1.953E+01  0.000E+00  0.000E+00  0.000E+00  1.210E+06  8.099E+00  0.000E+00   0.0E+00
   19   58  1.951E+01  0.000E+00  0.000E+00  0.000E+00  1.781E+06  2.286E+01  0.000E+00   0.0E+00
   19   59  1.950E+01  0.000E+00  0.000E+00  0.000E+00  4.839E+05  4.512E-01  0.000E+00   0.0E+00
   19   60  1.950E+01  0.000E+00  0.000E+00  0.000E+00  1.114E+05  1.373E+01  0.000E+00   0.0E+00
   19   61  1.952E+01  0.000E+00  0.000E+00  0.000E+00  0.000E+00  0.000E+00  5.731E+05   0.0E+00
   19   62  1.948E+01  0.000E+00  0.000E+00  0.000E+00  4.893E+04  0.000E+00  0.000E+00   0.0E+00
   19   63  1.949E+01  1.639E+12  5.602E-02  1.798E-02  0.000E+00  0.000E+00  2.800E+05   1.0E+00
   19   64  1.880E+01  0.000E+00  0.000E+00  0.000E+00  1.218E+09  8.662E+05  0.000E+00   0.0E+00
   19   65  1.861E+01  0.000E+00  0.000E+00  0.000E+00  2.401E+09  0.000E+00  0.000E+00   0.0E+00
   19   66  1.857E+01  0.000E+00  0.000E+00  0.000E+00  5.971E+08  8.345E+03  0.000E+00   0.0E+00
   19   67  1.856E+01  0.000E+00  0.000E+00  0.000E+00  8.413E+08  4.644E+04  0.000E+00   0.0E+00
   19   68  1.781E+01  8.674E+11  4.124E-02  1.209E-02  0.000E+00  0.000E+00  5.067E+00   9.9E-01
   19   69  1.776E+01  5.766E+11  2.726E-02  7.970E-03  0.000E+00  0.000E+00  7.776E+05   9.9E-01
   19   70  1.774E+01  5.698E+12  3.765E-01  1.100E-01  0.000E+00  0.000E+00  2.219E+06   1.0E+00
   19   71  1.770E+01  1.510E+11  4.255E-03  1.239E-03  0.000E+00  0.000E+00  7.321E+00   9.4E-01
   19   72  1.737E+01  0.000E+00  0.000E+00  0.000E+00  1.360E+09  1.444E+03  0.000E+00   0.0E+00
   19   73  1.736E+01  0.000E+00  0.000E+00  0.000E+00  4.919E+08  2.383E+01  0.000E+00   0.0E+00
   19   74  1.735E+01  0.000E+00  0.000E+00  0.000E+00  7.454E+09  0.000E+00  0.000E+00   0.0E+00
   19   75  1.735E+01  0.000E+00  0.000E+00  0.000E+00  1.120E+09  3.202E+02  0.000E+00   0.0E+00
   19   76  1.480E+01  0.000E+00  0.000E+00  0.000E+00  6.442E+03  4.015E+02  0.000E+00   0.0E+00
   19   77  1.473E+01  0.000E+00  0.000E+00  0.000E+00  2.277E+05  0.000E+00  0.000E+00   0.0E+00
   19   78  1.438E+01  0.000E+00  0.000E+00  0.000E+00  0.000E+00  0.000E+00  2.932E+02   0.0E+00
   19   79  1.438E+01  5.783E+08  1.075E-05  2.544E-06  0.000E+00  0.000E+00  1.435E+02   1.2E-01
   19   80  1.427E+01  1.997E+08  6.097E-06  1.432E-06  0.000E+00  0.000E+00  4.246E+00   1.2E+00
   19   81  1.423E+01  1.727E+09  3.146E-05  7.369E-06  0.000E+00  0.000E+00  4.358E+02   2.5E-01
   19   82  1.420E+01  4.166E+06  7.555E-08  1.766E-08  0.000E+00  0.000E+00  1.718E+02   4.0E+00
   19   83  1.419E+01  3.091E+08  9.330E-06  2.179E-06  0.000E+00  0.000E+00  7.659E-01   2.5E-01
   19   84  1.402E+01  0.000E+00  0.000E+00  0.000E+00  1.286E+05  2.576E+01  0.000E+00   0.0E+00
   19   85  1.401E+01  0.000E+00  0.000E+00  0.000E+00  5.728E+04  3.659E+00  0.000E+00   0.0E+00
   19   86  1.396E+01  0.000E+00  0.000E+00  0.000E+00  3.430E+04  1.437E+01  0.000E+00   0.0E+00
   19   87  1.395E+01  0.000E+00  0.000E+00  0.000E+00  1.627E+05  1.895E+01  0.000E+00   0.0E+00
   19   88  1.394E+01  0.000E+00  0.000E+00  0.000E+00  1.109E+06  2.796E+02  0.000E+00   0.0E+00
   19   89  1.388E+01  0.000E+00  0.000E+00  0.000E+00  1.758E+06  0.000E+00  0.000E+00   0.0E+00
   19   90  1.381E+01  0.000E+00  0.000E+00  0.000E+00  5.305E+05  1.097E+03  0.000E+00   0.0E+00
   19   91  1.380E+01  0.000E+00  0.000E+00  0.000E+00  1.447E+05  7.465E+01  0.000E+00   0.0E+00
   19   92  1.377E+01  0.000E+00  0.000E+00  0.000E+00  1.726E+05  3.136E+01  0.000E+00   0.0E+00
   19   93  1.375E+01  0.000E+00  0.000E+00  0.000E+00  0.000E+00  0.000E+00  1.002E+02   0.0E+00
   19   94  1.374E+01  3.087E+07  5.243E-07  1.186E-07  0.000E+00  0.000E+00  1.911E+01   7.8E+00
   19   95  1.373E+01  1.037E+09  4.105E-05  9.280E-06  0.000E+00  0.000E+00  3.511E+00   1.1E+00
   19   96  1.373E+01  1.488E+09  4.206E-05  9.504E-06  0.000E+00  0.000E+00  5.942E+02   5.3E-01
   19   97  1.373E+01  0.000E+00  0.000E+00  0.000E+00  0.000E+00  0.000E+00  1.904E+02   0.0E+00
   19   98  1.372E+01  2.369E+07  6.684E-07  1.509E-07  0.000E+00  0.000E+00  5.472E+02   8.4E-01
   19   99  1.373E+01  0.000E+00  0.000E+00  0.000E+00  3.525E+05  2.557E+01  0.000E+00   0.0E+00
   19  100  1.371E+01  3.442E+06  1.358E-07  3.064E-08  0.000E+00  0.000E+00  3.028E+01   2.9E-01
   19  101  1.367E+01  1.154E+09  1.939E-05  4.363E-06  0.000E+00  0.000E+00  3.696E+02   3.4E-02
   19  102  1.362E+01  2.196E+08  6.110E-06  1.370E-06  0.000E+00  0.000E+00  5.367E+01   1.1E+00
   19  103  1.362E+01  1.901E+09  7.396E-05  1.658E-05  0.000E+00  0.000E+00  2.970E+03   1.1E+00
   19  104  1.361E+01  0.000E+00  0.000E+00  0.000E+00  8.995E+04  0.000E+00  0.000E+00   0.0E+00
   19  105  1.361E+01  0.000E+00  0.000E+00  0.000E+00  1.815E+05  8.871E+00  0.000E+00   0.0E+00
   19  107  1.360E+01  0.000E+00  0.000E+00  0.000E+00  8.168E+03  3.184E+00  0.000E+00   0.0E+00
   19  108  1.360E+01  0.000E+00  0.000E+00  0.000E+00  1.563E+05  6.771E+00  0.000E+00   0.0E+00
   19  109  1.360E+01  3.912E+07  1.519E-06  3.401E-07  0.000E+00  0.000E+00  2.297E+02   1.0E+00
   19  110  1.360E+01  0.000E+00  0.000E+00  0.000E+00  3.366E+05  1.627E-02  0.000E+00   0.0E+00
   19  111  1.360E+01  0.000E+00  0.000E+00  0.000E+00  0.000E+00  0.000E+00  2.218E+02   0.0E+00
   19  112  1.360E+01  0.000E+00  0.000E+00  0.000E+00  1.043E+05  1.386E+01  0.000E+00   0.0E+00
   19  113  1.360E+01  0.000E+00  0.000E+00  0.000E+00  2.220E+04  0.000E+00  0.000E+00   0.0E+00
   19  116  1.358E+01  0.000E+00  0.000E+00  0.000E+00  0.000E+00  0.000E+00  2.787E-01   0.0E+00
   19  118  1.353E+01  5.238E+07  2.011E-06  4.478E-07  0.000E+00  0.000E+00  2.339E+00   1.1E+00
   19  119  1.352E+01  0.000E+00  0.000E+00  0.000E+00  0.000E+00  0.000E+00  5.249E+02   0.0E+00
   19  120  1.351E+01  5.189E+08  1.420E-05  3.159E-06  0.000E+00  0.000E+00  5.729E+01   1.0E+00
   19  121  1.350E+01  6.001E+09  2.296E-04  5.102E-05  0.000E+00  0.000E+00  9.202E+03   1.0E+00
   19  122  1.303E+01  0.000E+00  0.000E+00  0.000E+00  0.000E+00  0.000E+00  5.890E+05   0.0E+00
   19  123  1.303E+01  7.760E+11  1.185E-02  2.541E-03  0.000E+00  0.000E+00  2.933E+05   1.0E+00
   19  124  1.287E+01  0.000E+00  0.000E+00  0.000E+00  6.513E+08  6.562E+05  0.000E+00   0.0E+00
   19  125  1.283E+01  0.000E+00  0.000E+00  0.000E+00  1.330E+09  0.000E+00  0.000E+00   0.0E+00
   19  126  1.281E+01  0.000E+00  0.000E+00  0.000E+00  3.292E+08  9.506E+03  0.000E+00   0.0E+00
   19  127  1.281E+01  0.000E+00  0.000E+00  0.000E+00  4.605E+08  5.462E+04  0.000E+00   0.0E+00
   19  128  1.263E+01  4.531E+11  1.084E-02  2.254E-03  0.000E+00  0.000E+00  9.182E+00   9.9E-01
   19  129  1.262E+01  3.078E+11  7.347E-03  1.526E-03  0.000E+00  0.000E+00  8.155E+05   9.9E-01
   19  130  1.261E+01  3.009E+12  1.005E-01  2.087E-02  0.000E+00  0.000E+00  2.331E+06   9.9E-01
   19  131  1.261E+01  8.230E+10  1.176E-03  2.441E-04  0.000E+00  0.000E+00  3.597E+00   9.3E-01
   19  132  1.252E+01  0.000E+00  0.000E+00  0.000E+00  1.070E+08  8.741E+02  0.000E+00   0.0E+00
   19  133  1.252E+01  0.000E+00  0.000E+00  0.000E+00  3.812E+07  2.243E+01  0.000E+00   0.0E+00
   19  134  1.252E+01  0.000E+00  0.000E+00  0.000E+00  5.994E+08  0.000E+00  0.000E+00   0.0E+00
   19  135  1.252E+01  0.000E+00  0.000E+00  0.000E+00  9.106E+07  8.778E+01  0.000E+00   0.0E+00
   19  136  1.250E+01  0.000E+00  0.000E+00  0.000E+00  0.000E+00  0.000E+00  1.713E+00   0.0E+00
   19  137  1.250E+01  2.158E+07  7.078E-07  1.457E-07  0.000E+00  0.000E+00  1.044E+01   1.1E+00
   19  139  1.250E+01  0.000E+00  0.000E+00  0.000E+00  0.000E+00  0.000E+00  1.776E+00   0.0E+00
   20   21  9.405E+03  0.000E+00  0.000E+00  0.000E+00  0.000E+00  0.000E+00  1.696E-08   0.0E+00
   20   22  3.294E+03  0.000E+00  0.000E+00  0.000E+00  1.816E-03  3.696E+01  0.000E+00   0.0E+00
   20   23  7.339E+02  0.000E+00  0.000E+00  0.000E+00  1.506E+01  4.977E+03  0.000E+00   0.0E+00
   20   24  1.693E+02  0.000E+00  0.000E+00  0.000E+00  2.520E+02  3.953E+05  0.000E+00   0.0E+00
   20   25  1.599E+02  0.000E+00  0.000E+00  0.000E+00  2.213E+02  1.102E+06  0.000E+00   0.0E+00
   20   26  1.564E+02  0.000E+00  0.000E+00  0.000E+00  3.560E+02  2.323E+05  0.000E+00   0.0E+00
   20   27  1.433E+02  0.000E+00  0.000E+00  0.000E+00  2.594E+02  7.415E+05  0.000E+00   0.0E+00
   20   28  1.005E+02  6.043E+06  5.493E-06  9.090E-06  0.000E+00  0.000E+00  2.211E-01   1.0E-02
   20   29  9.171E+01  0.000E+00  0.000E+00  0.000E+00  0.000E+00  0.000E+00  4.668E+00   0.0E+00
   20   30  6.787E+01  0.000E+00  0.000E+00  0.000E+00  8.353E+02  0.000E+00  0.000E+00   0.0E+00
   20   31  6.745E+01  0.000E+00  0.000E+00  0.000E+00  7.467E+01  8.532E+03  0.000E+00   0.0E+00
   20   32  6.129E+01  0.000E+00  0.000E+00  0.000E+00  3.411E+02  5.142E+03  0.000E+00   0.0E+00
   20   33  6.042E+01  0.000E+00  0.000E+00  0.000E+00  6.296E+02  1.856E+03  0.000E+00   0.0E+00
   20   34  4.492E+01  5.857E+10  1.063E-02  7.857E-03  0.000E+00  0.000E+00  1.488E+03   6.2E-01
   20   35  4.474E+01  1.533E+08  4.600E-05  3.388E-05  0.000E+00  0.000E+00  3.190E+03   3.8E-01
   20   36  4.429E+01  1.179E+10  4.855E-03  3.539E-03  0.000E+00  0.000E+00  3.996E+03   6.0E-01
   20   37  4.294E+01  1.009E+11  2.790E-02  1.973E-02  0.000E+00  0.000E+00  1.009E-01   5.9E-01
   20   38  2.234E+01  0.000E+00  0.000E+00  0.000E+00  1.004E+06  6.115E+00  0.000E+00   0.0E+00
   20   39  2.229E+01  0.000E+00  0.000E+00  0.000E+00  3.121E+08  1.643E+02  0.000E+00   0.0E+00
   20   40  2.141E+01  4.104E+10  1.692E-03  5.965E-04  0.000E+00  0.000E+00  2.494E+04   1.0E+00
   20   41  2.138E+01  6.186E+10  4.240E-03  1.492E-03  0.000E+00  0.000E+00  1.527E+03   1.0E+00
   20   42  2.112E+01  7.162E+08  6.705E-05  2.331E-05  0.000E+00  0.000E+00  7.446E+03   9.4E-01
   20   43  2.111E+01  4.092E+11  1.640E-02  5.701E-03  0.000E+00  0.000E+00  3.031E-01   1.0E+00
   20   44  2.105E+01  3.699E+10  2.458E-03  8.517E-04  0.000E+00  0.000E+00  3.749E+04   1.0E+00
   20   45  2.077E+01  0.000E+00  0.000E+00  0.000E+00  0.000E+00  0.000E+00  8.701E+04   0.0E+00
   20   46  2.019E+01  0.000E+00  0.000E+00  0.000E+00  6.478E+06  0.000E+00  0.000E+00   0.0E+00
   20   47  2.016E+01  0.000E+00  0.000E+00  0.000E+00  2.205E+03  2.466E+04  0.000E+00   0.0E+00
   20   48  2.012E+01  0.000E+00  0.000E+00  0.000E+00  1.661E+08  1.123E+01  0.000E+00   0.0E+00
   20   49  2.010E+01  0.000E+00  0.000E+00  0.000E+00  1.599E+06  1.785E+04  0.000E+00   0.0E+00
   20   50  2.009E+01  0.000E+00  0.000E+00  0.000E+00  7.066E+05  0.000E+00  0.000E+00   0.0E+00
   20   51  2.005E+01  0.000E+00  0.000E+00  0.000E+00  2.280E+08  2.046E+04  0.000E+00   0.0E+00
   20   52  2.001E+01  0.000E+00  0.000E+00  0.000E+00  9.613E+07  2.974E+02  0.000E+00   0.0E+00
   20   53  1.985E+01  0.000E+00  0.000E+00  0.000E+00  5.479E+08  1.968E+04  0.000E+00   0.0E+00
   20   54  1.960E+01  6.706E+09  2.317E-04  7.474E-05  0.000E+00  0.000E+00  1.040E+05   1.0E+00
   20   55  1.959E+01  0.000E+00  0.000E+00  0.000E+00  0.000E+00  0.000E+00  1.840E+05   0.0E+00
   20   56  1.958E+01  4.635E+10  2.663E-03  8.583E-04  0.000E+00  0.000E+00  1.756E+05   1.0E+00
   20   58  1.955E+01  1.662E+12  1.334E-01  4.294E-02  0.000E+00  0.000E+00  1.845E+02   1.0E+00
   20   59  1.955E+01  1.859E+12  1.065E-01  3.425E-02  0.000E+00  0.000E+00  1.347E+06   9.9E-01
   20   60  1.954E+01  8.823E+12  7.070E-01  2.274E-01  0.000E+00  0.000E+00  6.492E+05   9.9E-01
   20   61  1.956E+01  0.000E+00  0.000E+00  0.000E+00  4.026E+03  0.000E+00  0.000E+00   0.0E+00
   20   62  1.953E+01  0.000E+00  0.000E+00  0.000E+00  0.000E+00  0.000E+00  2.229E+06   0.0E+00
   20   63  1.954E+01  0.000E+00  0.000E+00  0.000E+00  5.704E+06  2.727E+01  0.000E+00   0.0E+00
   20   64  1.884E+01  2.361E+08  7.535E-06  2.336E-06  0.000E+00  0.000E+00  4.049E+01   1.9E+00
   20   65  1.865E+01  0.000E+00  0.000E+00  0.000E+00  0.000E+00  0.000E+00  9.236E+01   0.0E+00
   20   66  1.861E+01  2.457E+08  7.653E-06  2.344E-06  0.000E+00  0.000E+00  6.478E+01   1.2E+00
   20   67  1.859E+01  6.773E+07  3.511E-06  1.075E-06  0.000E+00  0.000E+00  2.371E+01   2.5E+00
   20   68  1.784E+01  0.000E+00  0.000E+00  0.000E+00  2.966E+05  1.219E+02  0.000E+00   0.0E+00
   20   69  1.780E+01  0.000E+00  0.000E+00  0.000E+00  8.429E+04  9.943E+01  0.000E+00   0.0E+00
   20   70  1.778E+01  0.000E+00  0.000E+00  0.000E+00  7.485E+05  4.055E+00  0.000E+00   0.0E+00
   20   71  1.773E+01  0.000E+00  0.000E+00  0.000E+00  1.229E+03  5.340E+00  0.000E+00   0.0E+00
   20   72  1.741E+01  1.299E+10  8.258E-04  2.366E-04  0.000E+00  0.000E+00  1.095E+03   1.0E+00
   20   73  1.740E+01  5.649E+09  2.563E-04  7.339E-05  0.000E+00  0.000E+00  1.313E+03   1.0E+00
   20   74  1.739E+01  0.000E+00  0.000E+00  0.000E+00  0.000E+00  0.000E+00  1.419E+02   0.0E+00
   20   75  1.738E+01  9.895E+09  6.276E-04  1.796E-04  0.000E+00  0.000E+00  7.447E+03   9.4E-01
   20   76  1.483E+01  9.075E+08  1.794E-05  4.380E-06  0.000E+00  0.000E+00  3.246E+02   1.1E+00
   20   77  1.475E+01  0.000E+00  0.000E+00  0.000E+00  0.000E+00  0.000E+00  4.588E+01   0.0E+00
   20   78  1.440E+01  0.000E+00  0.000E+00  0.000E+00  5.452E+05  0.000E+00  0.000E+00   0.0E+00
   20   79  1.440E+01  0.000E+00  0.000E+00  0.000E+00  1.055E+07  1.687E+03  0.000E+00   0.0E+00
   20   80  1.429E+01  0.000E+00  0.000E+00  0.000E+00  2.410E+04  1.561E+02  0.000E+00   0.0E+00
   20   81  1.425E+01  0.000E+00  0.000E+00  0.000E+00  3.146E+07  1.034E+02  0.000E+00   0.0E+00
   20   82  1.422E+01  0.000E+00  0.000E+00  0.000E+00  1.352E+08  2.942E+01  0.000E+00   0.0E+00
   20   83  1.421E+01  0.000E+00  0.000E+00  0.000E+00  9.680E+05  1.019E+02  0.000E+00   0.0E+00
   20   84  1.404E+01  2.324E+10  4.119E-04  9.517E-05  0.000E+00  0.000E+00  2.291E+04   1.0E+00
   20   85  1.404E+01  2.677E+10  7.906E-04  1.827E-04  0.000E+00  0.000E+00  1.180E+03   9.9E-01
   20   86  1.398E+01  4.004E+08  1.642E-05  3.780E-06  0.000E+00  0.000E+00  6.543E+03   7.7E-01
   20   87  1.397E+01  1.641E+11  2.882E-03  6.629E-04  0.000E+00  0.000E+00  2.283E+01   1.0E+00
   20   88  1.396E+01  1.544E+10  4.514E-04  1.037E-04  0.000E+00  0.000E+00  3.539E+04   1.1E+00
   20   89  1.390E+01  0.000E+00  0.000E+00  0.000E+00  0.000E+00  0.000E+00  8.065E+04   0.0E+00
   20   90  1.383E+01  4.740E+08  8.153E-06  1.856E-06  0.000E+00  0.000E+00  1.744E+03   3.9E+00
   20   91  1.382E+01  1.322E+08  3.784E-06  8.607E-07  0.000E+00  0.000E+00  2.597E+03   1.5E+00
   20   92  1.380E+01  1.057E+10  4.222E-04  9.588E-05  0.000E+00  0.000E+00  3.632E+03   8.4E-01
   20   93  1.377E+01  0.000E+00  0.000E+00  0.000E+00  1.963E+06  0.000E+00  0.000E+00   0.0E+00
   20   94  1.376E+01  0.000E+00  0.000E+00  0.000E+00  4.057E+05  1.870E+04  0.000E+00   0.0E+00
   20   95  1.376E+01  0.000E+00  0.000E+00  0.000E+00  7.026E+07  4.973E+01  0.000E+00   0.0E+00
   20   96  1.375E+01  0.000E+00  0.000E+00  0.000E+00  2.402E+06  9.762E+03  0.000E+00   0.0E+00
   20   97  1.375E+01  0.000E+00  0.000E+00  0.000E+00  1.158E+05  0.000E+00  0.000E+00   0.0E+00
   20   98  1.374E+01  0.000E+00  0.000E+00  0.000E+00  1.067E+08  2.216E+04  0.000E+00   0.0E+00
   20   99  1.375E+01  4.800E+09  1.361E-04  3.080E-05  0.000E+00  0.000E+00  1.242E+04   1.2E+00
   20  100  1.373E+01  0.000E+00  0.000E+00  0.000E+00  3.660E+07  9.081E+02  0.000E+00   0.0E+00
   20  101  1.369E+01  0.000E+00  0.000E+00  0.000E+00  2.750E+08  2.264E+04  0.000E+00   0.0E+00
   20  102  1.364E+01  0.000E+00  0.000E+00  0.000E+00  5.170E+06  8.947E+00  0.000E+00   0.0E+00
   20  103  1.364E+01  0.000E+00  0.000E+00  0.000E+00  5.971E+08  1.831E+02  0.000E+00   0.0E+00
   20  104  1.363E+01  0.000E+00  0.000E+00  0.000E+00  0.000E+00  0.000E+00  1.189E+05   0.0E+00
   20  105  1.363E+01  1.672E+09  2.793E-05  6.265E-06  0.000E+00  0.000E+00  7.286E+04   1.4E+00
   20  107  1.362E+01  9.013E+09  2.508E-04  5.625E-05  0.000E+00  0.000E+00  5.963E+03   8.8E-01
   20  108  1.362E+01  1.492E+12  5.812E-02  1.303E-02  0.000E+00  0.000E+00  3.123E+04   1.0E+00
   20  109  1.362E+01  0.000E+00  0.000E+00  0.000E+00  9.657E+08  2.935E+02  0.000E+00   0.0E+00
   20  110  1.362E+01  6.656E+11  1.850E-02  4.148E-03  0.000E+00  0.000E+00  1.107E+06   9.8E-01
   20  111  1.362E+01  0.000E+00  0.000E+00  0.000E+00  1.709E+09  0.000E+00  0.000E+00   0.0E+00
   20  112  1.362E+01  2.200E+12  8.561E-02  1.919E-02  0.000E+00  0.000E+00  4.379E+05   9.9E-01
   20  113  1.362E+01  0.000E+00  0.000E+00  0.000E+00  0.000E+00  0.000E+00  1.670E+06   0.0E+00
   20  116  1.360E+01  0.000E+00  0.000E+00  0.000E+00  5.051E+09  0.000E+00  0.000E+00   0.0E+00
   20  118  1.355E+01  0.000E+00  0.000E+00  0.000E+00  8.038E+07  4.125E+01  0.000E+00   0.0E+00
   20  119  1.354E+01  0.000E+00  0.000E+00  0.000E+00  2.693E+08  0.000E+00  0.000E+00   0.0E+00
   20  120  1.353E+01  0.000E+00  0.000E+00  0.000E+00  2.300E+06  5.563E+02  0.000E+00   0.0E+00
   20  121  1.352E+01  0.000E+00  0.000E+00  0.000E+00  1.936E+08  8.198E+01  0.000E+00   0.0E+00
   20  122  1.305E+01  0.000E+00  0.000E+00  0.000E+00  1.374E+04  0.000E+00  0.000E+00   0.0E+00
   20  123  1.305E+01  0.000E+00  0.000E+00  0.000E+00  9.409E+04  2.922E+01  0.000E+00   0.0E+00
   20  124  1.289E+01  8.453E+07  1.262E-06  2.678E-07  0.000E+00  0.000E+00  1.213E+01   3.7E+00
   20  125  1.285E+01  0.000E+00  0.000E+00  0.000E+00  0.000E+00  0.000E+00  3.844E+01   0.0E+00
   20  126  1.283E+01  1.044E+08  1.547E-06  3.267E-07  0.000E+00  0.000E+00  6.682E+01   1.8E+00
   20  127  1.283E+01  1.990E+07  4.909E-07  1.037E-07  0.000E+00  0.000E+00  5.638E+00   5.0E+00
   20  128  1.265E+01  0.000E+00  0.000E+00  0.000E+00  1.836E+05  2.353E+01  0.000E+00   0.0E+00
   20  129  1.264E+01  0.000E+00  0.000E+00  0.000E+00  6.047E+04  1.195E+02  0.000E+00   0.0E+00
   20  130  1.263E+01  0.000E+00  0.000E+00  0.000E+00  3.291E+05  2.313E+00  0.000E+00   0.0E+00
   20  131  1.262E+01  0.000E+00  0.000E+00  0.000E+00  1.883E+05  5.778E-01  0.000E+00   0.0E+00
   20  132  1.254E+01  5.338E+09  1.762E-04  3.636E-05  0.000E+00  0.000E+00  8.851E+02   1.0E+00
   20  133  1.254E+01  2.044E+09  4.816E-05  9.937E-06  0.000E+00  0.000E+00  8.898E+02   1.1E+00
   20  134  1.253E+01  0.000E+00  0.000E+00  0.000E+00  0.000E+00  0.000E+00  1.607E+02   0.0E+00
   20  135  1.253E+01  4.406E+09  1.453E-04  2.997E-05  0.000E+00  0.000E+00  5.587E+03   9.5E-01
   20  136  1.252E+01  0.000E+00  0.000E+00  0.000E+00  1.150E+07  0.000E+00  0.000E+00   0.0E+00
   20  137  1.252E+01  0.000E+00  0.000E+00  0.000E+00  5.395E+06  2.554E+00  0.000E+00   0.0E+00
   20  139  1.252E+01  0.000E+00  0.000E+00  0.000E+00  7.151E+06  0.000E+00  0.000E+00   0.0E+00
   21   23  7.960E+02  1.318E+06  3.757E-04  9.846E-04  0.000E+00  0.000E+00  0.000E+00   3.6E-01
   21   24  1.724E+02  0.000E+00  0.000E+00  0.000E+00  0.000E+00  0.000E+00  8.626E-01   0.0E+00
   21   25  1.627E+02  0.000E+00  0.000E+00  0.000E+00  0.000E+00  0.000E+00  9.394E+00   0.0E+00
   21   27  1.455E+02  1.370E+10  1.304E-01  6.248E-02  0.000E+00  0.000E+00  0.000E+00   9.8E-01
   21   28  1.016E+02  0.000E+00  0.000E+00  0.000E+00  0.000E+00  3.518E+03  0.000E+00   0.0E+00
   21   31  6.793E+01  1.953E+10  4.054E-02  9.066E-03  0.000E+00  0.000E+00  0.000E+00   6.6E-01
   21   32  6.169E+01  0.000E+00  0.000E+00  0.000E+00  0.000E+00  0.000E+00  1.502E+02   0.0E+00
   21   33  6.081E+01  1.244E+10  2.069E-02  4.142E-03  0.000E+00  0.000E+00  0.000E+00   9.2E-01
   21   34  4.513E+01  0.000E+00  0.000E+00  0.000E+00  0.000E+00  1.024E+02  0.000E+00   0.0E+00
   21   35  4.495E+01  0.000E+00  0.000E+00  0.000E+00  3.281E+03  0.000E+00  0.000E+00   0.0E+00
   21   37  4.314E+01  0.000E+00  0.000E+00  0.000E+00  7.324E+04  0.000E+00  0.000E+00   0.0E+00
   21   38  2.240E+01  0.000E+00  0.000E+00  0.000E+00  0.000E+00  0.000E+00  6.296E+03   0.0E+00
   21   39  2.235E+01  5.651E+10  1.269E-02  9.338E-04  0.000E+00  0.000E+00  0.000E+00   8.4E-01
   21   40  2.146E+01  0.000E+00  0.000E+00  0.000E+00  0.000E+00  3.245E+04  0.000E+00   0.0E+00
   21   41  2.143E+01  0.000E+00  0.000E+00  0.000E+00  2.061E+07  0.000E+00  0.000E+00   0.0E+00
   21   43  2.116E+01  0.000E+00  0.000E+00  0.000E+00  0.000E+00  1.353E+02  0.000E+00   0.0E+00
   21   44  2.110E+01  0.000E+00  0.000E+00  0.000E+00  2.166E+07  0.000E+00  0.000E+00   0.0E+00
   21   47  2.020E+01  1.307E+06  2.399E-07  1.595E-08  0.000E+00  0.000E+00  0.000E+00   1.7E+01
   21   49  2.014E+01  0.000E+00  0.000E+00  0.000E+00  0.000E+00  0.000E+00  1.803E+04   0.0E+00
   21   51  2.010E+01  0.000E+00  0.000E+00  0.000E+00  0.000E+00  0.000E+00  5.777E+04   0.0E+00
   21   53  1.989E+01  3.006E+11  5.350E-02  3.503E-03  0.000E+00  0.000E+00  0.000E+00   1.0E+00
   21   54  1.964E+01  0.000E+00  0.000E+00  0.000E+00  0.000E+00  6.795E+01  0.000E+00   0.0E+00
   21   56  1.962E+01  0.000E+00  0.000E+00  0.000E+00  1.420E+07  0.000E+00  0.000E+00   0.0E+00
   21   59  1.959E+01  0.000E+00  0.000E+00  0.000E+00  2.428E+08  0.000E+00  0.000E+00   0.0E+00
   21   63  1.958E+01  2.580E+11  4.447E-02  2.866E-03  0.000E+00  0.000E+00  0.000E+00   9.3E-01
   21   64  1.888E+01  0.000E+00  0.000E+00  0.000E+00  0.000E+00  2.975E+03  0.000E+00   0.0E+00
   21   66  1.865E+01  0.000E+00  0.000E+00  0.000E+00  0.000E+00  3.024E+05  0.000E+00   0.0E+00
   21   67  1.863E+01  0.000E+00  0.000E+00  0.000E+00  4.300E+08  0.000E+00  0.000E+00   0.0E+00
   21   68  1.788E+01  0.000E+00  0.000E+00  0.000E+00  0.000E+00  0.000E+00  2.503E+04   0.0E+00
   21   69  1.783E+01  0.000E+00  0.000E+00  0.000E+00  0.000E+00  0.000E+00  2.448E+05   0.0E+00
   21   71  1.777E+01  2.849E+12  4.044E-01  2.365E-02  0.000E+00  0.000E+00  0.000E+00   1.0E+00
   21   73  1.743E+01  0.000E+00  0.000E+00  0.000E+00  3.030E+09  0.000E+00  0.000E+00   0.0E+00
   21   76  1.485E+01  0.000E+00  0.000E+00  0.000E+00  0.000E+00  8.966E+02  0.000E+00   0.0E+00
   21   79  1.442E+01  3.385E+08  3.166E-05  1.503E-06  0.000E+00  0.000E+00  0.000E+00   5.7E-01
   21   80  1.431E+01  0.000E+00  0.000E+00  0.000E+00  0.000E+00  0.000E+00  1.435E+03   0.0E+00
   21   81  1.427E+01  1.659E+09  1.520E-04  7.144E-06  0.000E+00  0.000E+00  0.000E+00   6.7E-01
   21   82  1.424E+01  2.782E+10  2.539E-03  1.190E-04  0.000E+00  0.000E+00  0.000E+00   6.3E-01
   21   83  1.423E+01  0.000E+00  0.000E+00  0.000E+00  0.000E+00  0.000E+00  6.839E+03   0.0E+00
   21   84  1.406E+01  0.000E+00  0.000E+00  0.000E+00  0.000E+00  1.963E+04  0.000E+00   0.0E+00
   21   85  1.406E+01  0.000E+00  0.000E+00  0.000E+00  1.183E+07  0.000E+00  0.000E+00   0.0E+00
   21   87  1.399E+01  0.000E+00  0.000E+00  0.000E+00  0.000E+00  9.390E+02  0.000E+00   0.0E+00
   21   88  1.398E+01  0.000E+00  0.000E+00  0.000E+00  1.108E+07  0.000E+00  0.000E+00   0.0E+00
   21   90  1.385E+01  0.000E+00  0.000E+00  0.000E+00  0.000E+00  4.561E+01  0.000E+00   0.0E+00
   21   91  1.384E+01  0.000E+00  0.000E+00  0.000E+00  9.560E+05  0.000E+00  0.000E+00   0.0E+00
   21   94  1.378E+01  4.311E+07  3.683E-06  1.671E-07  0.000E+00  0.000E+00  0.000E+00   2.3E+00
   21   96  1.377E+01  0.000E+00  0.000E+00  0.000E+00  0.000E+00  0.000E+00  1.204E+04   0.0E+00
   21   98  1.376E+01  0.000E+00  0.000E+00  0.000E+00  0.000E+00  0.000E+00  6.305E+04   0.0E+00
   21   99  1.377E+01  0.000E+00  0.000E+00  0.000E+00  1.377E+07  0.000E+00  0.000E+00   0.0E+00
   21  101  1.371E+01  1.659E+11  1.403E-02  6.331E-04  0.000E+00  0.000E+00  0.000E+00   9.5E-01
   21  102  1.366E+01  0.000E+00  0.000E+00  0.000E+00  0.000E+00  0.000E+00  7.290E+00   0.0E+00
   21  105  1.365E+01  0.000E+00  0.000E+00  0.000E+00  0.000E+00  4.669E+01  0.000E+00   0.0E+00
   21  107  1.364E+01  0.000E+00  0.000E+00  0.000E+00  9.029E+03  0.000E+00  0.000E+00   0.0E+00
   21  110  1.364E+01  0.000E+00  0.000E+00  0.000E+00  4.785E+06  0.000E+00  0.000E+00   0.0E+00
   21  120  1.355E+01  0.000E+00  0.000E+00  0.000E+00  0.000E+00  0.000E+00  1.672E+01   0.0E+00
   21  123  1.307E+01  1.554E+11  1.193E-02  5.132E-04  0.000E+00  0.000E+00  0.000E+00   8.7E-01
   21  124  1.290E+01  0.000E+00  0.000E+00  0.000E+00  0.000E+00  3.368E+03  0.000E+00   0.0E+00
   21  126  1.285E+01  0.000E+00  0.000E+00  0.000E+00  0.000E+00  1.882E+05  0.000E+00   0.0E+00
   21  127  1.285E+01  0.000E+00  0.000E+00  0.000E+00  2.480E+08  0.000E+00  0.000E+00   0.0E+00
   21  128  1.267E+01  0.000E+00  0.000E+00  0.000E+00  0.000E+00  0.000E+00  2.597E+04   0.0E+00
   21  129  1.265E+01  0.000E+00  0.000E+00  0.000E+00  0.000E+00  0.000E+00  2.629E+05   0.0E+00
   21  131  1.264E+01  1.528E+12  1.098E-01  4.569E-03  0.000E+00  0.000E+00  0.000E+00   9.8E-01
   21  133  1.255E+01  0.000E+00  0.000E+00  0.000E+00  2.430E+08  0.000E+00  0.000E+00   0.0E+00
   22   23  9.443E+02  0.000E+00  0.000E+00  0.000E+00  5.265E-03  0.000E+00  0.000E+00   0.0E+00
   22   24  1.785E+02  0.000E+00  0.000E+00  0.000E+00  1.828E+01  3.382E+03  0.000E+00   0.0E+00
   22   25  1.681E+02  0.000E+00  0.000E+00  0.000E+00  1.169E+03  1.311E+06  0.000E+00   0.0E+00
   22   26  1.642E+02  0.000E+00  0.000E+00  0.000E+00  4.846E+02  1.204E+06  0.000E+00   0.0E+00
   22   27  1.498E+02  0.000E+00  0.000E+00  0.000E+00  2.040E+00  0.000E+00  0.000E+00   0.0E+00
   22   28  1.037E+02  0.000E+00  0.000E+00  0.000E+00  0.000E+00  0.000E+00  1.047E+00   0.0E+00
   22   31  6.886E+01  0.000E+00  0.000E+00  0.000E+00  1.061E+02  0.000E+00  0.000E+00   0.0E+00
   22   32  6.245E+01  0.000E+00  0.000E+00  0.000E+00  9.219E+02  9.953E+03  0.000E+00   0.0E+00
   22   33  6.154E+01  0.000E+00  0.000E+00  0.000E+00  1.204E+02  0.000E+00  0.000E+00   0.0E+00
   22   34  4.554E+01  0.000E+00  0.000E+00  0.000E+00  0.000E+00  0.000E+00  2.569E+01   0.0E+00
   22   35  4.535E+01  1.646E+10  3.626E-03  3.789E-03  0.000E+00  0.000E+00  1.207E+03   6.2E-01
   22   36  4.489E+01  7.363E+10  2.224E-02  2.301E-02  0.000E+00  0.000E+00  6.610E+03   6.0E-01
   22   37  4.351E+01  9.407E+10  1.907E-02  1.912E-02  0.000E+00  0.000E+00  4.126E+03   5.9E-01
   22   38  2.249E+01  0.000E+00  0.000E+00  0.000E+00  1.560E+08  5.436E+00  0.000E+00   0.0E+00
   22   39  2.245E+01  0.000E+00  0.000E+00  0.000E+00  2.018E+08  0.000E+00  0.000E+00   0.0E+00
   22   40  2.155E+01  0.000E+00  0.000E+00  0.000E+00  0.000E+00  0.000E+00  7.110E+03   0.0E+00
   22   41  2.152E+01  1.212E+09  6.010E-05  2.981E-05  0.000E+00  0.000E+00  1.753E+04   9.0E-01
   22   42  2.126E+01  7.847E+10  5.315E-03  2.604E-03  0.000E+00  0.000E+00  5.332E+04   1.0E+00
   22   43  2.125E+01  0.000E+00  0.000E+00  0.000E+00  0.000E+00  0.000E+00  1.102E+05   0.0E+00
   22   44  2.119E+01  4.028E+11  1.936E-02  9.454E-03  0.000E+00  0.000E+00  2.694E+04   1.0E+00
   22   47  2.028E+01  0.000E+00  0.000E+00  0.000E+00  2.180E+08  0.000E+00  0.000E+00   0.0E+00
   22   48  2.024E+01  0.000E+00  0.000E+00  0.000E+00  8.693E+07  5.630E+03  0.000E+00   0.0E+00
   22   49  2.022E+01  0.000E+00  0.000E+00  0.000E+00  2.006E+08  9.451E+03  0.000E+00   0.0E+00
   22   50  2.021E+01  0.000E+00  0.000E+00  0.000E+00  1.860E+08  4.512E+03  0.000E+00   0.0E+00
   22   51  2.018E+01  0.000E+00  0.000E+00  0.000E+00  1.976E+08  3.793E+04  0.000E+00   0.0E+00
   22   52  2.013E+01  0.000E+00  0.000E+00  0.000E+00  2.077E+08  3.183E+04  0.000E+00   0.0E+00
   22   53  1.997E+01  0.000E+00  0.000E+00  0.000E+00  1.740E+07  0.000E+00  0.000E+00   0.0E+00
   22   54  1.972E+01  0.000E+00  0.000E+00  0.000E+00  0.000E+00  0.000E+00  6.261E+00   0.0E+00
   22   55  1.970E+01  4.993E+11  3.737E-02  1.697E-02  0.000E+00  0.000E+00  3.828E+04   1.0E+00
   22   56  1.969E+01  3.059E+11  1.271E-02  5.767E-03  0.000E+00  0.000E+00  1.912E+05   9.8E-01
   22   57  1.968E+01  0.000E+00  0.000E+00  0.000E+00  0.000E+00  0.000E+00  1.166E+06   0.0E+00
   22   58  1.967E+01  1.176E+12  6.819E-02  3.091E-02  0.000E+00  0.000E+00  1.992E+05   9.9E-01
   22   59  1.966E+01  1.362E+08  5.639E-06  2.555E-06  0.000E+00  0.000E+00  3.340E+05   9.3E-01
   22   60  1.966E+01  1.456E+12  8.431E-02  3.819E-02  0.000E+00  0.000E+00  2.422E+06   9.8E-01
   22   62  1.964E+01  1.011E+13  7.518E-01  3.403E-01  0.000E+00  0.000E+00  3.071E+06   1.0E+00
   22   63  1.965E+01  0.000E+00  0.000E+00  0.000E+00  1.228E+05  0.000E+00  0.000E+00   0.0E+00
   22   64  1.895E+01  0.000E+00  0.000E+00  0.000E+00  0.000E+00  0.000E+00  1.976E+00   0.0E+00
   22   66  1.871E+01  0.000E+00  0.000E+00  0.000E+00  0.000E+00  0.000E+00  1.626E+01   0.0E+00
   22   67  1.870E+01  2.199E+07  8.237E-07  3.550E-07  0.000E+00  0.000E+00  1.156E+01   2.2E+00
   22   68  1.794E+01  0.000E+00  0.000E+00  0.000E+00  1.328E+05  3.547E+00  0.000E+00   0.0E+00
   22   69  1.789E+01  0.000E+00  0.000E+00  0.000E+00  3.940E+05  4.543E+02  0.000E+00   0.0E+00
   22   70  1.788E+01  0.000E+00  0.000E+00  0.000E+00  2.488E+05  3.163E+02  0.000E+00   0.0E+00
   22   71  1.783E+01  0.000E+00  0.000E+00  0.000E+00  4.838E+05  0.000E+00  0.000E+00   0.0E+00
   22   72  1.750E+01  1.786E+08  8.197E-06  3.305E-06  0.000E+00  0.000E+00  8.148E+01   9.3E-01
   22   73  1.749E+01  3.125E+07  1.023E-06  4.125E-07  0.000E+00  0.000E+00  2.956E+00   1.4E+00
   22   74  1.748E+01  6.925E+08  4.078E-05  1.642E-05  0.000E+00  0.000E+00  9.338E+02   1.0E+00
   22   75  1.748E+01  2.658E+08  1.217E-05  4.901E-06  0.000E+00  0.000E+00  2.657E+03   1.6E+00
   22   76  1.489E+01  0.000E+00  0.000E+00  0.000E+00  0.000E+00  0.000E+00  8.936E+01   0.0E+00
   22   79  1.446E+01  0.000E+00  0.000E+00  0.000E+00  3.808E+06  0.000E+00  0.000E+00   0.0E+00
   22   80  1.435E+01  0.000E+00  0.000E+00  0.000E+00  3.883E+07  1.200E+02  0.000E+00   0.0E+00
   22   81  1.431E+01  0.000E+00  0.000E+00  0.000E+00  2.642E+07  0.000E+00  0.000E+00   0.0E+00
   22   82  1.428E+01  0.000E+00  0.000E+00  0.000E+00  8.411E+07  0.000E+00  0.000E+00   0.0E+00
   22   83  1.427E+01  0.000E+00  0.000E+00  0.000E+00  4.930E+07  7.268E+01  0.000E+00   0.0E+00
   22   84  1.410E+01  0.000E+00  0.000E+00  0.000E+00  0.000E+00  0.000E+00  9.377E+03   0.0E+00
   22   85  1.410E+01  9.235E+08  1.965E-05  6.384E-06  0.000E+00  0.000E+00  1.579E+04   7.7E-01
   22   86  1.404E+01  3.521E+10  1.040E-03  3.366E-04  0.000E+00  0.000E+00  5.405E+04   9.9E-01
   22   87  1.403E+01  0.000E+00  0.000E+00  0.000E+00  0.000E+00  0.000E+00  1.006E+05   0.0E+00
   22   88  1.402E+01  1.717E+11  3.615E-03  1.168E-03  0.000E+00  0.000E+00  2.572E+04   1.0E+00
   22   90  1.389E+01  0.000E+00  0.000E+00  0.000E+00  0.000E+00  0.000E+00  1.148E+02   0.0E+00
   22   91  1.388E+01  2.208E+09  4.552E-05  1.456E-05  0.000E+00  0.000E+00  4.836E+03   1.0E+00
   22   92  1.385E+01  1.469E+10  4.228E-04  1.350E-04  0.000E+00  0.000E+00  2.612E+04   9.4E-01
   22   94  1.382E+01  0.000E+00  0.000E+00  0.000E+00  9.897E+07  0.000E+00  0.000E+00   0.0E+00
   22   95  1.381E+01  0.000E+00  0.000E+00  0.000E+00  4.194E+07  4.607E+03  0.000E+00   0.0E+00
   22   96  1.381E+01  0.000E+00  0.000E+00  0.000E+00  8.101E+07  9.538E+03  0.000E+00   0.0E+00
   22   97  1.381E+01  0.000E+00  0.000E+00  0.000E+00  8.378E+07  5.036E+03  0.000E+00   0.0E+00
   22   98  1.380E+01  0.000E+00  0.000E+00  0.000E+00  1.109E+08  3.046E+04  0.000E+00   0.0E+00
   22   99  1.381E+01  5.693E+08  1.162E-05  3.699E-06  0.000E+00  0.000E+00  4.331E+03   4.2E+00
   22  100  1.379E+01  0.000E+00  0.000E+00  0.000E+00  1.012E+08  3.453E+04  0.000E+00   0.0E+00
   22  101  1.375E+01  0.000E+00  0.000E+00  0.000E+00  8.417E+06  0.000E+00  0.000E+00   0.0E+00
   22  102  1.370E+01  0.000E+00  0.000E+00  0.000E+00  4.901E+07  3.460E-01  0.000E+00   0.0E+00
   22  103  1.369E+01  0.000E+00  0.000E+00  0.000E+00  3.602E+08  2.079E+02  0.000E+00   0.0E+00
   22  104  1.369E+01  1.470E+11  5.309E-03  1.674E-03  0.000E+00  0.000E+00  2.013E+04   9.9E-01
   22  105  1.369E+01  0.000E+00  0.000E+00  0.000E+00  0.000E+00  0.000E+00  3.905E+00   0.0E+00
   22  106  1.368E+01  0.000E+00  0.000E+00  0.000E+00  0.000E+00  0.000E+00  8.500E+05   0.0E+00
   22  107  1.368E+01  9.522E+10  1.908E-03  6.016E-04  0.000E+00  0.000E+00  4.858E+04   9.9E-01
   22  108  1.368E+01  1.744E+11  4.893E-03  1.542E-03  0.000E+00  0.000E+00  1.669E+01   9.9E-01
   22  109  1.368E+01  0.000E+00  0.000E+00  0.000E+00  9.978E+07  1.503E+02  0.000E+00   0.0E+00
   22  110  1.367E+01  7.057E+09  1.413E-04  4.453E-05  0.000E+00  0.000E+00  3.227E+05   1.1E+00
   22  111  1.368E+01  0.000E+00  0.000E+00  0.000E+00  2.124E+09  6.788E+01  0.000E+00   0.0E+00
   22  112  1.367E+01  7.385E+11  2.070E-02  6.522E-03  0.000E+00  0.000E+00  1.904E+06   9.7E-01
   22  113  1.367E+01  3.580E+12  1.290E-01  4.065E-02  0.000E+00  0.000E+00  2.261E+06   9.9E-01
   22  114  1.366E+01  0.000E+00  0.000E+00  0.000E+00  5.156E+08  0.000E+00  0.000E+00   0.0E+00
   22  116  1.366E+01  0.000E+00  0.000E+00  0.000E+00  2.799E+07  6.787E+02  0.000E+00   0.0E+00
   22  117  1.366E+01  0.000E+00  0.000E+00  0.000E+00  6.734E+09  0.000E+00  0.000E+00   0.0E+00
   22  118  1.360E+01  0.000E+00  0.000E+00  0.000E+00  4.747E+07  6.914E-01  0.000E+00   0.0E+00
   22  119  1.360E+01  0.000E+00  0.000E+00  0.000E+00  3.389E+08  3.678E-02  0.000E+00   0.0E+00
   22  120  1.359E+01  0.000E+00  0.000E+00  0.000E+00  1.345E+07  3.193E+01  0.000E+00   0.0E+00
   22  121  1.358E+01  0.000E+00  0.000E+00  0.000E+00  5.930E+07  3.741E+02  0.000E+00   0.0E+00
   22  123  1.310E+01  0.000E+00  0.000E+00  0.000E+00  5.034E+04  0.000E+00  0.000E+00   0.0E+00
   22  124  1.294E+01  0.000E+00  0.000E+00  0.000E+00  0.000E+00  0.000E+00  1.609E+01   0.0E+00
   22  126  1.288E+01  0.000E+00  0.000E+00  0.000E+00  0.000E+00  0.000E+00  3.604E+00   0.0E+00
   22  127  1.288E+01  7.392E+06  1.313E-07  3.897E-08  0.000E+00  0.000E+00  1.090E+01   2.8E+00
   22  128  1.270E+01  0.000E+00  0.000E+00  0.000E+00  6.574E+04  2.062E-01  0.000E+00   0.0E+00
   22  129  1.269E+01  0.000E+00  0.000E+00  0.000E+00  9.614E+04  1.651E+02  0.000E+00   0.0E+00
   22  130  1.268E+01  0.000E+00  0.000E+00  0.000E+00  1.004E+05  1.130E+02  0.000E+00   0.0E+00
   22  131  1.267E+01  0.000E+00  0.000E+00  0.000E+00  7.080E+04  0.000E+00  0.000E+00   0.0E+00
   22  132  1.259E+01  7.234E+07  1.718E-06  4.984E-07  0.000E+00  0.000E+00  5.385E+01   7.9E-01
   22  133  1.258E+01  3.287E+05  5.573E-09  1.616E-09  0.000E+00  0.000E+00  2.115E+00   2.8E+01
   22  134  1.258E+01  3.281E+08  1.001E-05  2.902E-06  0.000E+00  0.000E+00  8.827E+02   1.1E+00
   22  135  1.258E+01  4.078E+07  9.676E-07  2.805E-07  0.000E+00  0.000E+00  1.783E+03   2.2E+00
   22  136  1.257E+01  0.000E+00  0.000E+00  0.000E+00  1.658E+05  3.851E-01  0.000E+00   0.0E+00
   22  137  1.257E+01  0.000E+00  0.000E+00  0.000E+00  5.841E+04  1.987E-01  0.000E+00   0.0E+00
   22  138  1.257E+01  0.000E+00  0.000E+00  0.000E+00  1.650E+06  0.000E+00  0.000E+00   0.0E+00
   22  139  1.256E+01  0.000E+00  0.000E+00  0.000E+00  2.454E+05  3.686E+00  0.000E+00   0.0E+00
   23   24  2.201E+02  0.000E+00  0.000E+00  0.000E+00  4.374E+01  2.527E+04  0.000E+00   0.0E+00
   23   25  2.044E+02  0.000E+00  0.000E+00  0.000E+00  4.088E+01  8.506E+05  0.000E+00   0.0E+00
   23   26  1.988E+02  0.000E+00  0.000E+00  0.000E+00  3.631E+02  0.000E+00  0.000E+00   0.0E+00
   23   27  1.780E+02  0.000E+00  0.000E+00  0.000E+00  1.065E+02  2.570E+05  0.000E+00   0.0E+00
   23   28  1.165E+02  7.585E+04  1.543E-07  1.775E-07  0.000E+00  0.000E+00  1.295E-01   8.9E+00
   23   29  1.048E+02  9.114E+08  5.003E-04  5.178E-04  0.000E+00  0.000E+00  0.000E+00   3.5E+00
   23   30  7.479E+01  0.000E+00  0.000E+00  0.000E+00  0.000E+00  2.804E+01  0.000E+00   0.0E+00
   23   31  7.427E+01  0.000E+00  0.000E+00  0.000E+00  1.238E+02  2.933E+03  0.000E+00   0.0E+00
   23   32  6.688E+01  0.000E+00  0.000E+00  0.000E+00  7.182E+01  6.263E+03  0.000E+00   0.0E+00
   23   33  6.584E+01  0.000E+00  0.000E+00  0.000E+00  1.305E+03  2.000E+02  0.000E+00   0.0E+00
   23   34  4.784E+01  2.383E+10  8.178E-03  3.864E-03  0.000E+00  0.000E+00  7.041E+01   5.8E-01
   23   35  4.764E+01  1.096E+10  6.216E-03  2.925E-03  0.000E+00  0.000E+00  5.291E+02   6.1E-01
   23   36  4.713E+01  0.000E+00  0.000E+00  0.000E+00  0.000E+00  0.000E+00  1.747E+03   0.0E+00
   23   37  4.561E+01  3.594E+10  1.869E-02  8.418E-03  0.000E+00  0.000E+00  3.639E+01   4.9E-01
   23   38  2.304E+01  0.000E+00  0.000E+00  0.000E+00  9.138E+05  9.776E+01  0.000E+00   0.0E+00
   23   39  2.299E+01  0.000E+00  0.000E+00  0.000E+00  2.015E+08  5.042E+01  0.000E+00   0.0E+00
   23   40  2.206E+01  2.606E+10  1.901E-03  4.140E-04  0.000E+00  0.000E+00  3.510E+04   8.8E-01
   23   41  2.202E+01  3.253E+09  3.942E-04  8.575E-05  0.000E+00  0.000E+00  9.944E+01   1.1E+00
   23   42  2.175E+01  0.000E+00  0.000E+00  0.000E+00  0.000E+00  0.000E+00  5.696E+01   0.0E+00
   23   43  2.174E+01  1.855E+11  1.314E-02  2.820E-03  0.000E+00  0.000E+00  4.731E+04   8.5E-01
   23   44  2.167E+01  1.602E+08  1.880E-05  4.024E-06  0.000E+00  0.000E+00  2.407E+04   2.3E+00
   23   45  2.138E+01  5.524E+11  1.261E-02  2.663E-03  0.000E+00  0.000E+00  0.000E+00   9.1E-01
   23   46  2.077E+01  0.000E+00  0.000E+00  0.000E+00  0.000E+00  8.087E+04  0.000E+00   0.0E+00
   23   47  2.073E+01  0.000E+00  0.000E+00  0.000E+00  6.986E+06  3.467E+04  0.000E+00   0.0E+00
   23   48  2.069E+01  0.000E+00  0.000E+00  0.000E+00  1.316E+07  0.000E+00  0.000E+00   0.0E+00
   23   49  2.066E+01  0.000E+00  0.000E+00  0.000E+00  8.307E+06  1.351E+03  0.000E+00   0.0E+00
   23   51  2.062E+01  0.000E+00  0.000E+00  0.000E+00  3.403E+08  6.895E+02  0.000E+00   0.0E+00
   23   52  2.057E+01  0.000E+00  0.000E+00  0.000E+00  2.584E+06  0.000E+00  0.000E+00   0.0E+00
   23   53  2.040E+01  0.000E+00  0.000E+00  0.000E+00  2.439E+08  1.149E+04  0.000E+00   0.0E+00
   23   54  2.014E+01  5.301E+10  3.222E-03  6.409E-04  0.000E+00  0.000E+00  7.077E+04   9.6E-01
   23   56  2.011E+01  3.778E+11  3.819E-02  7.586E-03  0.000E+00  0.000E+00  5.942E+05   9.7E-01
   23   58  2.009E+01  0.000E+00  0.000E+00  0.000E+00  0.000E+00  0.000E+00  3.875E+04   0.0E+00
   23   59  2.008E+01  8.938E+12  9.005E-01  1.786E-01  0.000E+00  0.000E+00  1.078E+06   9.9E-01
   23   60  2.007E+01  0.000E+00  0.000E+00  0.000E+00  0.000E+00  0.000E+00  1.822E+06   0.0E+00
   23   61  2.010E+01  0.000E+00  0.000E+00  0.000E+00  0.000E+00  6.718E+00  0.000E+00   0.0E+00
   23   63  2.007E+01  0.000E+00  0.000E+00  0.000E+00  2.017E+07  1.690E+02  0.000E+00   0.0E+00
   23   64  1.933E+01  1.098E+08  6.156E-06  1.175E-06  0.000E+00  0.000E+00  9.597E+00   1.4E+00
   23   65  1.914E+01  1.685E+10  3.085E-04  5.831E-05  0.000E+00  0.000E+00  0.000E+00   1.7E+00
   23   66  1.909E+01  1.442E+08  7.882E-06  1.486E-06  0.000E+00  0.000E+00  1.189E+03   2.1E-01
   23   67  1.908E+01  4.918E+09  4.473E-04  8.428E-05  0.000E+00  0.000E+00  5.039E+02   8.4E-01
   23   68  1.829E+01  0.000E+00  0.000E+00  0.000E+00  2.917E+05  3.878E+02  0.000E+00   0.0E+00
   23   69  1.824E+01  0.000E+00  0.000E+00  0.000E+00  1.963E+05  2.681E+03  0.000E+00   0.0E+00
   23   70  1.822E+01  0.000E+00  0.000E+00  0.000E+00  9.117E+06  0.000E+00  0.000E+00   0.0E+00
   23   71  1.817E+01  0.000E+00  0.000E+00  0.000E+00  2.006E+07  1.284E+01  0.000E+00   0.0E+00
   23   72  1.783E+01  0.000E+00  0.000E+00  0.000E+00  0.000E+00  0.000E+00  3.834E+03   0.0E+00
   23   73  1.782E+01  3.461E+11  2.746E-02  4.832E-03  0.000E+00  0.000E+00  2.198E+04   1.0E+00
   23   75  1.781E+01  0.000E+00  0.000E+00  0.000E+00  0.000E+00  0.000E+00  3.694E+04   0.0E+00
   23   76  1.513E+01  3.154E+08  1.083E-05  1.618E-06  0.000E+00  0.000E+00  2.198E+03   1.0E+00
   23   77  1.505E+01  1.292E+09  1.463E-05  2.175E-06  0.000E+00  0.000E+00  0.000E+00   8.8E-02
   23   78  1.469E+01  0.000E+00  0.000E+00  0.000E+00  0.000E+00  6.833E+02  0.000E+00   0.0E+00
   23   79  1.469E+01  0.000E+00  0.000E+00  0.000E+00  1.111E+07  4.351E+01  0.000E+00   0.0E+00
   23   80  1.458E+01  0.000E+00  0.000E+00  0.000E+00  1.981E+04  2.165E+00  0.000E+00   0.0E+00
   23   81  1.453E+01  0.000E+00  0.000E+00  0.000E+00  3.994E+07  2.909E+01  0.000E+00   0.0E+00
   23   82  1.450E+01  0.000E+00  0.000E+00  0.000E+00  7.739E+07  3.503E+01  0.000E+00   0.0E+00
   23   83  1.449E+01  0.000E+00  0.000E+00  0.000E+00  8.934E+05  1.263E+01  0.000E+00   0.0E+00
   23   84  1.431E+01  1.514E+10  4.651E-04  6.574E-05  0.000E+00  0.000E+00  3.248E+04   7.6E-01
   23   85  1.431E+01  1.306E+09  6.680E-05  9.441E-06  0.000E+00  0.000E+00  5.718E+01   1.0E+00
   23   86  1.425E+01  0.000E+00  0.000E+00  0.000E+00  0.000E+00  0.000E+00  3.043E+00   0.0E+00
   23   87  1.424E+01  8.312E+10  2.529E-03  3.558E-04  0.000E+00  0.000E+00  5.383E+04   7.3E-01
   23   88  1.423E+01  3.347E+07  1.694E-06  2.382E-07  0.000E+00  0.000E+00  2.479E+04   3.0E+00
   23   89  1.417E+01  2.632E+11  2.641E-03  3.696E-04  0.000E+00  0.000E+00  0.000E+00   7.8E-01
   23   90  1.409E+01  1.354E+09  4.032E-05  5.612E-06  0.000E+00  0.000E+00  1.466E+03   1.3E+00
   23   91  1.408E+01  2.406E+09  1.192E-04  1.658E-05  0.000E+00  0.000E+00  9.497E+03   7.6E-01
   23   92  1.406E+01  0.000E+00  0.000E+00  0.000E+00  0.000E+00  0.000E+00  1.778E+04   0.0E+00
   23   93  1.403E+01  0.000E+00  0.000E+00  0.000E+00  0.000E+00  5.788E+04  0.000E+00   0.0E+00
   23   94  1.403E+01  0.000E+00  0.000E+00  0.000E+00  2.570E+06  2.418E+04  0.000E+00   0.0E+00
   23   95  1.402E+01  0.000E+00  0.000E+00  0.000E+00  1.297E+07  0.000E+00  0.000E+00   0.0E+00
   23   96  1.401E+01  0.000E+00  0.000E+00  0.000E+00  8.776E+06  8.365E+02  0.000E+00   0.0E+00
   23   98  1.400E+01  0.000E+00  0.000E+00  0.000E+00  1.564E+08  2.222E+03  0.000E+00   0.0E+00
   23   99  1.401E+01  2.573E+10  1.263E-03  1.748E-04  0.000E+00  0.000E+00  1.223E+04   9.6E-01
   23  100  1.399E+01  0.000E+00  0.000E+00  0.000E+00  6.409E+06  0.000E+00  0.000E+00   0.0E+00
   23  101  1.395E+01  0.000E+00  0.000E+00  0.000E+00  1.296E+08  1.748E+04  0.000E+00   0.0E+00
   23  102  1.390E+01  0.000E+00  0.000E+00  0.000E+00  2.282E+07  1.801E+02  0.000E+00   0.0E+00
   23  103  1.390E+01  0.000E+00  0.000E+00  0.000E+00  2.227E+09  0.000E+00  0.000E+00   0.0E+00
   23  105  1.389E+01  1.674E+10  4.839E-04  6.637E-05  0.000E+00  0.000E+00  4.894E+04   9.3E-01
   23  107  1.388E+01  1.492E+10  7.186E-04  9.852E-05  0.000E+00  0.000E+00  1.511E+05   1.0E+00
   23  108  1.388E+01  0.000E+00  0.000E+00  0.000E+00  0.000E+00  0.000E+00  2.446E+04   0.0E+00
   23  109  1.388E+01  0.000E+00  0.000E+00  0.000E+00  3.190E+09  0.000E+00  0.000E+00   0.0E+00
   23  110  1.388E+01  3.131E+12  1.506E-01  2.064E-02  0.000E+00  0.000E+00  1.036E+06   9.8E-01
   23  112  1.387E+01  0.000E+00  0.000E+00  0.000E+00  0.000E+00  0.000E+00  1.308E+06   0.0E+00
   23  118  1.380E+01  0.000E+00  0.000E+00  0.000E+00  1.862E+08  0.000E+00  0.000E+00   0.0E+00
   23  120  1.379E+01  0.000E+00  0.000E+00  0.000E+00  1.346E+07  4.546E+02  0.000E+00   0.0E+00
   23  121  1.378E+01  0.000E+00  0.000E+00  0.000E+00  6.303E+08  0.000E+00  0.000E+00   0.0E+00
   23  122  1.329E+01  0.000E+00  0.000E+00  0.000E+00  0.000E+00  5.377E+01  0.000E+00   0.0E+00
   23  123  1.328E+01  0.000E+00  0.000E+00  0.000E+00  1.985E+06  1.836E+01  0.000E+00   0.0E+00
   23  124  1.312E+01  2.458E+08  6.339E-06  8.211E-07  0.000E+00  0.000E+00  1.227E+01   6.4E-01
   23  125  1.308E+01  8.024E+09  6.857E-05  8.856E-06  0.000E+00  0.000E+00  0.000E+00   2.5E+00
   23  126  1.306E+01  2.391E+08  6.113E-06  7.885E-07  0.000E+00  0.000E+00  1.038E+03   1.4E-01
   23  127  1.306E+01  2.414E+09  1.028E-04  1.326E-05  0.000E+00  0.000E+00  6.957E+02   8.7E-01
   23  128  1.287E+01  0.000E+00  0.000E+00  0.000E+00  2.055E+05  1.844E+02  0.000E+00   0.0E+00
   23  129  1.286E+01  0.000E+00  0.000E+00  0.000E+00  1.209E+05  6.475E+02  0.000E+00   0.0E+00
   23  130  1.285E+01  0.000E+00  0.000E+00  0.000E+00  4.409E+06  0.000E+00  0.000E+00   0.0E+00
   23  131  1.285E+01  0.000E+00  0.000E+00  0.000E+00  9.830E+06  9.742E+01  0.000E+00   0.0E+00
   23  132  1.276E+01  0.000E+00  0.000E+00  0.000E+00  0.000E+00  0.000E+00  3.216E+03   0.0E+00
   23  133  1.275E+01  1.351E+11  5.492E-03  6.917E-04  0.000E+00  0.000E+00  1.629E+04   1.0E+00
   23  135  1.275E+01  0.000E+00  0.000E+00  0.000E+00  0.000E+00  0.000E+00  2.756E+04   0.0E+00
   23  137  1.274E+01  0.000E+00  0.000E+00  0.000E+00  2.044E+08  0.000E+00  0.000E+00   0.0E+00
   24   25  2.874E+03  0.000E+00  0.000E+00  0.000E+00  1.616E-03  3.082E+01  0.000E+00   0.0E+00
   24   26  2.050E+03  0.000E+00  0.000E+00  0.000E+00  2.547E-02  1.148E+03  0.000E+00   0.0E+00
   24   27  9.316E+02  0.000E+00  0.000E+00  0.000E+00  2.692E+00  5.060E+02  0.000E+00   0.0E+00
   24   28  2.474E+02  4.563E+03  2.513E-08  1.024E-07  0.000E+00  0.000E+00  4.840E-04   5.0E+01
   24   29  2.001E+02  0.000E+00  0.000E+00  0.000E+00  0.000E+00  0.000E+00  1.225E-03   0.0E+00
   24   30  1.133E+02  0.000E+00  0.000E+00  0.000E+00  6.120E+02  0.000E+00  0.000E+00   0.0E+00
   24   31  1.121E+02  0.000E+00  0.000E+00  0.000E+00  2.916E+02  6.825E+02  0.000E+00   0.0E+00
   24   32  9.607E+01  0.000E+00  0.000E+00  0.000E+00  5.521E+01  3.460E+02  0.000E+00   0.0E+00
   24   33  9.394E+01  0.000E+00  0.000E+00  0.000E+00  1.967E+00  6.236E+00  0.000E+00   0.0E+00
   24   34  6.113E+01  5.211E+10  1.752E-02  1.763E-02  0.000E+00  0.000E+00  8.300E-01   5.0E-01
   24   35  6.080E+01  2.269E+10  1.257E-02  1.258E-02  0.000E+00  0.000E+00  4.583E+00   4.8E-01
   24   36  5.997E+01  1.163E+08  8.779E-05  8.666E-05  0.000E+00  0.000E+00  2.565E-01   6.0E-01
   24   37  5.754E+01  8.597E+09  4.267E-03  4.041E-03  0.000E+00  0.000E+00  3.050E-02   4.3E-01
   24   38  2.574E+01  0.000E+00  0.000E+00  0.000E+00  1.304E+04  1.189E+01  0.000E+00   0.0E+00
   24   39  2.567E+01  0.000E+00  0.000E+00  0.000E+00  1.649E+05  2.882E+01  0.000E+00   0.0E+00
   24   40  2.451E+01  1.688E+08  9.121E-06  3.680E-06  0.000E+00  0.000E+00  4.267E+01   6.8E-01
   24   41  2.447E+01  4.078E+08  3.661E-05  1.475E-05  0.000E+00  0.000E+00  8.349E-01   6.6E-01
   24   42  2.413E+01  1.535E+05  1.876E-08  7.451E-09  0.000E+00  0.000E+00  2.374E+01   4.1E+00
   24   43  2.412E+01  5.599E+08  2.930E-05  1.163E-05  0.000E+00  0.000E+00  5.151E-02   7.4E-01
   24   44  2.404E+01  5.793E+07  5.020E-06  1.986E-06  0.000E+00  0.000E+00  5.424E+01   5.7E-01
   24   45  2.367E+01  0.000E+00  0.000E+00  0.000E+00  0.000E+00  0.000E+00  1.597E+01   0.0E+00
   24   46  2.293E+01  0.000E+00  0.000E+00  0.000E+00  8.353E+04  0.000E+00  0.000E+00   0.0E+00
   24   47  2.288E+01  0.000E+00  0.000E+00  0.000E+00  4.679E+05  1.875E+02  0.000E+00   0.0E+00
   24   48  2.283E+01  0.000E+00  0.000E+00  0.000E+00  1.719E+05  2.727E+00  0.000E+00   0.0E+00
   24   49  2.281E+01  0.000E+00  0.000E+00  0.000E+00  1.243E+05  3.556E+01  0.000E+00   0.0E+00
   24   50  2.280E+01  0.000E+00  0.000E+00  0.000E+00  2.244E+02  0.000E+00  0.000E+00   0.0E+00
   24   51  2.275E+01  0.000E+00  0.000E+00  0.000E+00  1.670E+05  1.050E+01  0.000E+00   0.0E+00
   24   52  2.269E+01  0.000E+00  0.000E+00  0.000E+00  9.774E+04  1.881E+01  0.000E+00   0.0E+00
   24   53  2.248E+01  0.000E+00  0.000E+00  0.000E+00  4.062E+06  1.468E+02  0.000E+00   0.0E+00
   24   54  2.216E+01  4.400E+06  1.944E-07  7.092E-08  0.000E+00  0.000E+00  1.958E+02   7.6E-01
   24   55  2.215E+01  0.000E+00  0.000E+00  0.000E+00  0.000E+00  0.000E+00  4.477E+02   0.0E+00
   24   56  2.214E+01  2.029E+08  1.490E-05  5.431E-06  0.000E+00  0.000E+00  4.137E+01   1.2E+00
   24   58  2.211E+01  2.533E+09  2.598E-04  9.452E-05  0.000E+00  0.000E+00  7.964E+00   9.2E-01
   24   59  2.210E+01  4.041E+09  2.958E-04  1.076E-04  0.000E+00  0.000E+00  1.466E+03   1.0E+00
   24   60  2.209E+01  8.761E+09  8.972E-04  3.262E-04  0.000E+00  0.000E+00  2.682E+02   1.0E+00
   24   61  2.212E+01  0.000E+00  0.000E+00  0.000E+00  4.066E+08  0.000E+00  0.000E+00   0.0E+00
   24   62  2.207E+01  0.000E+00  0.000E+00  0.000E+00  0.000E+00  0.000E+00  1.968E+03   0.0E+00
   24   63  2.209E+01  0.000E+00  0.000E+00  0.000E+00  1.888E+08  8.286E+00  0.000E+00   0.0E+00
   24   64  2.119E+01  5.380E+11  2.174E-02  7.586E-03  0.000E+00  0.000E+00  3.163E+03   1.0E+00
   24   65  2.096E+01  0.000E+00  0.000E+00  0.000E+00  0.000E+00  0.000E+00  6.015E+03   0.0E+00
   24   66  2.091E+01  9.650E+09  3.794E-04  1.306E-04  0.000E+00  0.000E+00  2.438E+00   1.1E+00
   24   67  2.089E+01  4.959E+10  3.244E-03  1.116E-03  0.000E+00  0.000E+00  1.692E+00   1.0E+00
   24   68  1.995E+01  0.000E+00  0.000E+00  0.000E+00  4.601E+08  1.651E+04  0.000E+00   0.0E+00
   24   69  1.989E+01  0.000E+00  0.000E+00  0.000E+00  5.643E+07  2.218E+03  0.000E+00   0.0E+00
   24   70  1.986E+01  0.000E+00  0.000E+00  0.000E+00  1.586E+08  1.594E+04  0.000E+00   0.0E+00
   24   71  1.981E+01  0.000E+00  0.000E+00  0.000E+00  3.289E+08  2.385E+03  0.000E+00   0.0E+00
   24   72  1.940E+01  1.107E+13  8.742E-01  2.792E-01  0.000E+00  0.000E+00  6.564E+05   1.0E+00
   24   73  1.939E+01  1.142E+12  6.437E-02  2.054E-02  0.000E+00  0.000E+00  2.349E+05   9.8E-01
   24   74  1.938E+01  0.000E+00  0.000E+00  0.000E+00  0.000E+00  0.000E+00  1.019E+06   0.0E+00
   24   75  1.937E+01  3.254E+09  2.563E-04  8.174E-05  0.000E+00  0.000E+00  1.494E+05   1.0E+00
   24   76  1.625E+01  1.274E+08  3.027E-06  8.097E-07  0.000E+00  0.000E+00  2.271E+01   1.1E+00
   24   77  1.616E+01  0.000E+00  0.000E+00  0.000E+00  0.000E+00  0.000E+00  1.201E+02   0.0E+00
   24   78  1.574E+01  0.000E+00  0.000E+00  0.000E+00  3.354E+03  0.000E+00  0.000E+00   0.0E+00
   24   79  1.574E+01  0.000E+00  0.000E+00  0.000E+00  6.746E+04  4.214E+01  0.000E+00   0.0E+00
   24   80  1.561E+01  0.000E+00  0.000E+00  0.000E+00  7.410E+04  1.388E+01  0.000E+00   0.0E+00
   24   81  1.556E+01  0.000E+00  0.000E+00  0.000E+00  5.166E+05  2.895E+00  0.000E+00   0.0E+00
   24   82  1.553E+01  0.000E+00  0.000E+00  0.000E+00  1.218E+05  3.912E+01  0.000E+00   0.0E+00
   24   83  1.551E+01  0.000E+00  0.000E+00  0.000E+00  1.198E+04  1.608E-01  0.000E+00   0.0E+00
   24   84  1.531E+01  6.797E+07  1.433E-06  3.609E-07  0.000E+00  0.000E+00  6.430E+01   5.9E-01
   24   85  1.531E+01  1.846E+08  6.485E-06  1.634E-06  0.000E+00  0.000E+00  2.024E+00   5.9E-01
   24   86  1.524E+01  9.804E+06  4.778E-07  1.199E-07  0.000E+00  0.000E+00  9.741E+00   1.1E+00
   24   87  1.523E+01  3.920E+08  8.180E-06  2.051E-06  0.000E+00  0.000E+00  4.552E-01   7.0E-01
   24   88  1.522E+01  2.608E+07  9.057E-07  2.269E-07  0.000E+00  0.000E+00  8.111E+01   5.3E-01
   24   89  1.515E+01  0.000E+00  0.000E+00  0.000E+00  0.000E+00  0.000E+00  9.970E+01   0.0E+00
   24   90  1.506E+01  1.891E+09  3.857E-05  9.559E-06  0.000E+00  0.000E+00  3.128E+02   1.9E-02
   24   91  1.505E+01  3.230E+08  1.096E-05  2.715E-06  0.000E+00  0.000E+00  8.503E+01   1.3E-01
   24   92  1.502E+01  4.873E+08  2.307E-05  5.703E-06  0.000E+00  0.000E+00  1.139E+02   1.4E+00
   24   93  1.499E+01  0.000E+00  0.000E+00  0.000E+00  5.334E+05  0.000E+00  0.000E+00   0.0E+00
   24   94  1.498E+01  0.000E+00  0.000E+00  0.000E+00  1.219E+05  1.061E+02  0.000E+00   0.0E+00
   24   95  1.497E+01  0.000E+00  0.000E+00  0.000E+00  1.134E+05  9.541E-01  0.000E+00   0.0E+00
   24   96  1.497E+01  0.000E+00  0.000E+00  0.000E+00  1.393E+04  3.063E+01  0.000E+00   0.0E+00
   24   97  1.496E+01  0.000E+00  0.000E+00  0.000E+00  9.663E+02  0.000E+00  0.000E+00   0.0E+00
   24   98  1.495E+01  0.000E+00  0.000E+00  0.000E+00  1.325E+05  4.818E+00  0.000E+00   0.0E+00
   24   99  1.497E+01  1.768E+08  5.939E-06  1.463E-06  0.000E+00  0.000E+00  2.871E+02   1.3E+00
   24  100  1.494E+01  0.000E+00  0.000E+00  0.000E+00  8.211E+03  1.396E+01  0.000E+00   0.0E+00
   24  101  1.490E+01  0.000E+00  0.000E+00  0.000E+00  2.262E+05  1.543E+01  0.000E+00   0.0E+00
   24  102  1.484E+01  0.000E+00  0.000E+00  0.000E+00  2.829E+03  9.279E+00  0.000E+00   0.0E+00
   24  103  1.483E+01  0.000E+00  0.000E+00  0.000E+00  4.319E+04  4.057E+01  0.000E+00   0.0E+00
   24  104  1.482E+01  0.000E+00  0.000E+00  0.000E+00  0.000E+00  0.000E+00  2.839E+02   0.0E+00
   24  105  1.482E+01  5.295E+06  1.046E-07  2.552E-08  0.000E+00  0.000E+00  2.092E+02   2.8E+01
   24  107  1.482E+01  7.169E+07  2.359E-06  5.754E-07  0.000E+00  0.000E+00  8.975E+00   3.3E+00
   24  108  1.481E+01  3.660E+09  1.686E-04  4.110E-05  0.000E+00  0.000E+00  1.691E+02   9.0E-01
   24  109  1.481E+01  0.000E+00  0.000E+00  0.000E+00  5.520E+06  1.196E+02  0.000E+00   0.0E+00
   24  110  1.481E+01  7.098E+08  2.334E-05  5.689E-06  0.000E+00  0.000E+00  7.248E+02   1.0E+00
   24  111  1.481E+01  0.000E+00  0.000E+00  0.000E+00  8.683E+05  0.000E+00  0.000E+00   0.0E+00
   24  112  1.481E+01  2.184E+09  1.005E-04  2.450E-05  0.000E+00  0.000E+00  2.912E+02   1.0E+00
   24  113  1.481E+01  0.000E+00  0.000E+00  0.000E+00  0.000E+00  0.000E+00  1.867E+03   0.0E+00
   24  116  1.479E+01  0.000E+00  0.000E+00  0.000E+00  8.247E+06  0.000E+00  0.000E+00   0.0E+00
   24  118  1.473E+01  0.000E+00  0.000E+00  0.000E+00  1.304E+06  5.638E+02  0.000E+00   0.0E+00
   24  119  1.472E+01  0.000E+00  0.000E+00  0.000E+00  3.367E+06  0.000E+00  0.000E+00   0.0E+00
   24  120  1.471E+01  0.000E+00  0.000E+00  0.000E+00  4.510E+04  2.564E+01  0.000E+00   0.0E+00
   24  121  1.470E+01  0.000E+00  0.000E+00  0.000E+00  6.326E+05  4.412E+00  0.000E+00   0.0E+00
   24  122  1.414E+01  0.000E+00  0.000E+00  0.000E+00  2.249E+08  0.000E+00  0.000E+00   0.0E+00
   24  123  1.414E+01  0.000E+00  0.000E+00  0.000E+00  1.078E+08  5.365E-01  0.000E+00   0.0E+00
   24  124  1.395E+01  2.194E+11  3.840E-03  8.815E-04  0.000E+00  0.000E+00  2.946E+03   1.1E+00
   24  125  1.390E+01  0.000E+00  0.000E+00  0.000E+00  0.000E+00  0.000E+00  5.521E+03   0.0E+00
   24  126  1.388E+01  3.904E+09  6.769E-05  1.547E-05  0.000E+00  0.000E+00  2.531E+00   1.1E+00
   24  127  1.388E+01  2.046E+10  5.911E-04  1.350E-04  0.000E+00  0.000E+00  9.421E-01   1.1E+00
   24  128  1.367E+01  0.000E+00  0.000E+00  0.000E+00  2.172E+08  1.585E+04  0.000E+00   0.0E+00
   24  129  1.366E+01  0.000E+00  0.000E+00  0.000E+00  2.682E+07  1.128E+03  0.000E+00   0.0E+00
   24  130  1.365E+01  0.000E+00  0.000E+00  0.000E+00  7.482E+07  9.321E+03  0.000E+00   0.0E+00
   24  131  1.364E+01  0.000E+00  0.000E+00  0.000E+00  1.594E+08  2.478E+03  0.000E+00   0.0E+00
   24  132  1.354E+01  3.899E+12  1.501E-01  3.345E-02  0.000E+00  0.000E+00  4.795E+05   1.0E+00
   24  133  1.354E+01  4.119E+11  1.132E-02  2.522E-03  0.000E+00  0.000E+00  1.733E+05   9.8E-01
   24  134  1.353E+01  0.000E+00  0.000E+00  0.000E+00  0.000E+00  0.000E+00  7.546E+05   0.0E+00
   24  135  1.353E+01  1.230E+09  4.729E-05  1.054E-05  0.000E+00  0.000E+00  1.109E+05   1.0E+00
   24  136  1.352E+01  0.000E+00  0.000E+00  0.000E+00  7.648E+09  0.000E+00  0.000E+00   0.0E+00
   24  137  1.352E+01  0.000E+00  0.000E+00  0.000E+00  1.082E+09  2.613E+01  0.000E+00   0.0E+00
   24  139  1.352E+01  0.000E+00  0.000E+00  0.000E+00  5.369E+06  0.000E+00  0.000E+00   0.0E+00
   25   26  7.156E+03  0.000E+00  0.000E+00  0.000E+00  3.329E-05  9.953E+00  0.000E+00   0.0E+00
   25   27  1.378E+03  0.000E+00  0.000E+00  0.000E+00  2.617E-01  4.675E+03  0.000E+00   0.0E+00
   25   28  2.707E+02  1.474E+06  9.718E-06  4.331E-05  0.000E+00  0.000E+00  1.981E-02   9.8E-01
   25   29  2.151E+02  0.000E+00  0.000E+00  0.000E+00  0.000E+00  0.000E+00  1.943E-01   0.0E+00
   25   30  1.179E+02  0.000E+00  0.000E+00  0.000E+00  1.139E+01  0.000E+00  0.000E+00   0.0E+00
   25   31  1.167E+02  0.000E+00  0.000E+00  0.000E+00  1.087E+01  9.201E+02  0.000E+00   0.0E+00
   25   32  9.939E+01  0.000E+00  0.000E+00  0.000E+00  5.017E+01  2.758E+03  0.000E+00   0.0E+00
   25   33  9.711E+01  0.000E+00  0.000E+00  0.000E+00  2.630E+02  8.132E+03  0.000E+00   0.0E+00
   25   34  6.246E+01  6.054E+07  2.124E-05  2.184E-05  0.000E+00  0.000E+00  1.092E+00   3.2E-01
   25   35  6.211E+01  5.812E+09  3.362E-03  3.437E-03  0.000E+00  0.000E+00  1.520E-01   5.0E-01
   25   36  6.125E+01  1.815E+10  1.429E-02  1.441E-02  0.000E+00  0.000E+00  2.852E+01   4.2E-01
   25   37  5.872E+01  1.310E+10  6.769E-03  6.542E-03  0.000E+00  0.000E+00  1.137E+01   4.5E-01
   25   38  2.597E+01  0.000E+00  0.000E+00  0.000E+00  6.183E+05  1.589E+00  0.000E+00   0.0E+00
   25   39  2.591E+01  0.000E+00  0.000E+00  0.000E+00  1.097E+05  2.084E+02  0.000E+00   0.0E+00
   25   40  2.472E+01  2.108E+08  1.159E-05  4.715E-06  0.000E+00  0.000E+00  4.813E-01   1.0E+00
   25   41  2.468E+01  1.918E+08  1.752E-05  7.119E-06  0.000E+00  0.000E+00  9.845E+01   6.7E-01
   25   42  2.433E+01  7.699E+08  9.569E-05  3.833E-05  0.000E+00  0.000E+00  1.782E+02   8.3E-01
   25   43  2.432E+01  4.281E+08  2.278E-05  9.122E-06  0.000E+00  0.000E+00  9.015E+00   8.1E-01
   25   44  2.424E+01  7.517E+08  6.623E-05  2.643E-05  0.000E+00  0.000E+00  2.265E+02   6.7E-01
   25   45  2.387E+01  0.000E+00  0.000E+00  0.000E+00  0.000E+00  0.000E+00  3.814E+03   0.0E+00
   25   46  2.311E+01  0.000E+00  0.000E+00  0.000E+00  2.463E+06  0.000E+00  0.000E+00   0.0E+00
   25   47  2.307E+01  0.000E+00  0.000E+00  0.000E+00  5.330E+05  4.378E+01  0.000E+00   0.0E+00
   25   48  2.301E+01  0.000E+00  0.000E+00  0.000E+00  6.607E+04  4.205E+01  0.000E+00   0.0E+00
   25   49  2.299E+01  0.000E+00  0.000E+00  0.000E+00  4.809E+05  1.445E+02  0.000E+00   0.0E+00
   25   50  2.298E+01  0.000E+00  0.000E+00  0.000E+00  5.410E+05  0.000E+00  0.000E+00   0.0E+00
   25   51  2.293E+01  0.000E+00  0.000E+00  0.000E+00  5.681E+04  9.787E+00  0.000E+00   0.0E+00
   25   52  2.287E+01  0.000E+00  0.000E+00  0.000E+00  8.707E+05  1.113E+01  0.000E+00   0.0E+00
   25   53  2.266E+01  0.000E+00  0.000E+00  0.000E+00  3.022E+06  4.819E+03  0.000E+00   0.0E+00
   25   54  2.234E+01  3.593E+09  1.612E-04  5.928E-05  0.000E+00  0.000E+00  2.080E+02   9.0E-01
   25   55  2.232E+01  0.000E+00  0.000E+00  0.000E+00  0.000E+00  0.000E+00  1.151E+02   0.0E+00
   25   56  2.231E+01  2.058E+10  1.536E-03  5.640E-04  0.000E+00  0.000E+00  6.146E+03   9.6E-01
   25   58  2.228E+01  8.814E+09  9.181E-04  3.367E-04  0.000E+00  0.000E+00  5.821E+02   1.0E+00
   25   59  2.227E+01  4.317E+08  3.209E-05  1.176E-05  0.000E+00  0.000E+00  4.772E+03   7.4E-01
   25   60  2.226E+01  1.382E+10  1.437E-03  5.265E-04  0.000E+00  0.000E+00  5.193E+03   1.1E+00
   25   61  2.229E+01  0.000E+00  0.000E+00  0.000E+00  5.979E+08  0.000E+00  0.000E+00   0.0E+00
   25   62  2.224E+01  0.000E+00  0.000E+00  0.000E+00  0.000E+00  0.000E+00  2.378E+03   0.0E+00
   25   63  2.226E+01  0.000E+00  0.000E+00  0.000E+00  1.276E+08  1.180E+03  0.000E+00   0.0E+00
   25   64  2.135E+01  2.106E+07  8.636E-07  3.035E-07  0.000E+00  0.000E+00  1.524E+04   1.0E+00
   25   65  2.111E+01  0.000E+00  0.000E+00  0.000E+00  0.000E+00  0.000E+00  6.006E+04   0.0E+00
   25   66  2.106E+01  5.364E+11  2.140E-02  7.417E-03  0.000E+00  0.000E+00  1.294E+05   1.0E+00
   25   67  2.104E+01  3.718E+10  2.469E-03  8.550E-04  0.000E+00  0.000E+00  3.291E+04   1.0E+00
   25   68  2.008E+01  0.000E+00  0.000E+00  0.000E+00  5.523E+07  1.715E+03  0.000E+00   0.0E+00
   25   69  2.002E+01  0.000E+00  0.000E+00  0.000E+00  5.882E+08  3.515E+04  0.000E+00   0.0E+00
   25   70  2.000E+01  0.000E+00  0.000E+00  0.000E+00  1.065E+08  3.629E+03  0.000E+00   0.0E+00
   25   71  1.994E+01  0.000E+00  0.000E+00  0.000E+00  2.222E+08  3.266E+04  0.000E+00   0.0E+00
   25   72  1.953E+01  6.338E+10  5.075E-03  1.632E-03  0.000E+00  0.000E+00  2.472E+03   1.0E+00
   25   73  1.952E+01  7.375E+11  4.213E-02  1.354E-02  0.000E+00  0.000E+00  2.385E+00   1.0E+00
   25   74  1.951E+01  0.000E+00  0.000E+00  0.000E+00  0.000E+00  0.000E+00  4.966E+05   0.0E+00
   25   75  1.950E+01  1.128E+13  9.009E-01  2.892E-01  0.000E+00  0.000E+00  5.812E+06   9.9E-01
   25   76  1.634E+01  3.566E+09  8.568E-05  2.305E-05  0.000E+00  0.000E+00  8.551E+02   1.0E+00
   25   77  1.625E+01  0.000E+00  0.000E+00  0.000E+00  0.000E+00  0.000E+00  1.132E+03   0.0E+00
   25   78  1.583E+01  0.000E+00  0.000E+00  0.000E+00  7.732E+06  0.000E+00  0.000E+00   0.0E+00
   25   79  1.582E+01  0.000E+00  0.000E+00  0.000E+00  2.659E+06  4.711E+03  0.000E+00   0.0E+00
   25   80  1.569E+01  0.000E+00  0.000E+00  0.000E+00  2.058E+05  2.214E+00  0.000E+00   0.0E+00
   25   81  1.565E+01  0.000E+00  0.000E+00  0.000E+00  2.162E+06  5.598E+02  0.000E+00   0.0E+00
   25   82  1.561E+01  0.000E+00  0.000E+00  0.000E+00  1.605E+04  3.694E+02  0.000E+00   0.0E+00
   25   83  1.560E+01  0.000E+00  0.000E+00  0.000E+00  1.915E+06  6.545E+00  0.000E+00   0.0E+00
   25   84  1.539E+01  4.804E+08  1.023E-05  2.593E-06  0.000E+00  0.000E+00  4.981E+01   7.8E-01
   25   85  1.539E+01  1.836E+08  6.515E-06  1.650E-06  0.000E+00  0.000E+00  9.973E+01   6.7E-01
   25   86  1.532E+01  1.207E+06  5.946E-08  1.499E-08  0.000E+00  0.000E+00  8.676E+00   1.1E+01
   25   87  1.531E+01  6.926E+08  1.461E-05  3.682E-06  0.000E+00  0.000E+00  2.164E+01   6.6E-01
   25   88  1.530E+01  3.480E+08  1.221E-05  3.075E-06  0.000E+00  0.000E+00  3.839E+02   4.5E-01
   25   89  1.523E+01  0.000E+00  0.000E+00  0.000E+00  0.000E+00  0.000E+00  2.366E+03   0.0E+00
   25   90  1.514E+01  1.448E+09  2.985E-05  7.438E-06  0.000E+00  0.000E+00  4.764E+01   7.3E-01
   25   91  1.512E+01  4.916E+09  1.686E-04  4.197E-05  0.000E+00  0.000E+00  1.056E+03   1.2E+00
   25   92  1.510E+01  1.128E+10  5.397E-04  1.341E-04  0.000E+00  0.000E+00  3.844E+03   1.2E+00
   25   93  1.507E+01  0.000E+00  0.000E+00  0.000E+00  2.528E+06  0.000E+00  0.000E+00   0.0E+00
   25   94  1.506E+01  0.000E+00  0.000E+00  0.000E+00  5.791E+05  5.022E+01  0.000E+00   0.0E+00
   25   95  1.505E+01  0.000E+00  0.000E+00  0.000E+00  3.115E+04  2.738E+01  0.000E+00   0.0E+00
   25   96  1.504E+01  0.000E+00  0.000E+00  0.000E+00  1.846E+04  1.544E+02  0.000E+00   0.0E+00
   25   97  1.504E+01  0.000E+00  0.000E+00  0.000E+00  1.597E+05  0.000E+00  0.000E+00   0.0E+00
   25   98  1.503E+01  0.000E+00  0.000E+00  0.000E+00  1.010E+05  6.338E+01  0.000E+00   0.0E+00
   25   99  1.505E+01  5.480E+08  1.859E-05  4.605E-06  0.000E+00  0.000E+00  3.854E+03   1.4E+00
   25  100  1.502E+01  0.000E+00  0.000E+00  0.000E+00  3.480E+05  4.245E+01  0.000E+00   0.0E+00
   25  101  1.497E+01  0.000E+00  0.000E+00  0.000E+00  1.467E+05  1.400E+03  0.000E+00   0.0E+00
   25  102  1.492E+01  0.000E+00  0.000E+00  0.000E+00  1.657E+06  1.658E+01  0.000E+00   0.0E+00
   25  103  1.491E+01  0.000E+00  0.000E+00  0.000E+00  5.290E+06  5.526E+01  0.000E+00   0.0E+00
   25  104  1.490E+01  0.000E+00  0.000E+00  0.000E+00  0.000E+00  0.000E+00  7.445E+01   0.0E+00
   25  105  1.490E+01  8.365E+08  1.670E-05  4.095E-06  0.000E+00  0.000E+00  1.445E+02   6.7E-01
   25  107  1.489E+01  4.317E+09  1.436E-04  3.519E-05  0.000E+00  0.000E+00  1.520E+03   9.5E-01
   25  108  1.489E+01  1.388E+09  6.460E-05  1.583E-05  0.000E+00  0.000E+00  9.333E+01   9.9E-01
   25  109  1.489E+01  0.000E+00  0.000E+00  0.000E+00  3.138E+05  4.161E+00  0.000E+00   0.0E+00
   25  110  1.489E+01  7.168E+08  2.381E-05  5.834E-06  0.000E+00  0.000E+00  4.239E+03   7.5E-01
   25  111  1.489E+01  0.000E+00  0.000E+00  0.000E+00  2.209E+06  0.000E+00  0.000E+00   0.0E+00
   25  112  1.488E+01  6.563E+09  3.051E-04  7.476E-05  0.000E+00  0.000E+00  5.800E+03   1.0E+00
   25  113  1.488E+01  0.000E+00  0.000E+00  0.000E+00  0.000E+00  0.000E+00  1.335E+03   0.0E+00
   25  116  1.487E+01  0.000E+00  0.000E+00  0.000E+00  1.457E+05  0.000E+00  0.000E+00   0.0E+00
   25  118  1.480E+01  0.000E+00  0.000E+00  0.000E+00  1.656E+07  2.785E+01  0.000E+00   0.0E+00
   25  119  1.479E+01  0.000E+00  0.000E+00  0.000E+00  9.180E+07  0.000E+00  0.000E+00   0.0E+00
   25  120  1.478E+01  0.000E+00  0.000E+00  0.000E+00  5.037E+06  2.811E+01  0.000E+00   0.0E+00
   25  121  1.477E+01  0.000E+00  0.000E+00  0.000E+00  8.343E+06  1.542E+02  0.000E+00   0.0E+00
   25  122  1.421E+01  0.000E+00  0.000E+00  0.000E+00  3.243E+08  0.000E+00  0.000E+00   0.0E+00
   25  123  1.421E+01  0.000E+00  0.000E+00  0.000E+00  7.142E+07  2.495E+02  0.000E+00   0.0E+00
   25  124  1.402E+01  7.498E+06  1.325E-07  3.057E-08  0.000E+00  0.000E+00  1.399E+04   8.7E-01
   25  125  1.397E+01  0.000E+00  0.000E+00  0.000E+00  0.000E+00  0.000E+00  5.732E+04   0.0E+00
   25  126  1.395E+01  2.199E+11  3.851E-03  8.843E-04  0.000E+00  0.000E+00  1.176E+05   1.1E+00
   25  127  1.395E+01  1.543E+10  4.500E-04  1.033E-04  0.000E+00  0.000E+00  2.957E+04   1.0E+00
   25  128  1.374E+01  0.000E+00  0.000E+00  0.000E+00  2.616E+07  1.666E+03  0.000E+00   0.0E+00
   25  129  1.372E+01  0.000E+00  0.000E+00  0.000E+00  2.775E+08  4.257E+04  0.000E+00   0.0E+00
   25  130  1.372E+01  0.000E+00  0.000E+00  0.000E+00  5.002E+07  3.213E+03  0.000E+00   0.0E+00
   25  131  1.371E+01  0.000E+00  0.000E+00  0.000E+00  1.063E+08  2.914E+04  0.000E+00   0.0E+00
   25  132  1.361E+01  2.213E+10  8.600E-04  1.926E-04  0.000E+00  0.000E+00  1.849E+03   1.0E+00
   25  133  1.360E+01  2.601E+11  7.215E-03  1.616E-03  0.000E+00  0.000E+00  1.510E-01   1.0E+00
   25  134  1.360E+01  0.000E+00  0.000E+00  0.000E+00  0.000E+00  0.000E+00  3.657E+05   0.0E+00
   25  135  1.360E+01  3.997E+12  1.551E-01  3.472E-02  0.000E+00  0.000E+00  4.275E+06   9.9E-01
   25  136  1.359E+01  0.000E+00  0.000E+00  0.000E+00  1.087E+08  0.000E+00  0.000E+00   0.0E+00
   25  137  1.358E+01  0.000E+00  0.000E+00  0.000E+00  7.258E+08  8.692E+02  0.000E+00   0.0E+00
   25  139  1.358E+01  0.000E+00  0.000E+00  0.000E+00  7.704E+09  0.000E+00  0.000E+00   0.0E+00
   26   27  1.707E+03  0.000E+00  0.000E+00  0.000E+00  1.395E-02  0.000E+00  0.000E+00   0.0E+00
   26   28  2.814E+02  0.000E+00  0.000E+00  0.000E+00  0.000E+00  0.000E+00  6.633E-03   0.0E+00
   26   31  1.186E+02  0.000E+00  0.000E+00  0.000E+00  3.959E+01  0.000E+00  0.000E+00   0.0E+00
   26   32  1.008E+02  0.000E+00  0.000E+00  0.000E+00  1.038E+02  9.452E+02  0.000E+00   0.0E+00
   26   33  9.845E+01  0.000E+00  0.000E+00  0.000E+00  3.803E+02  0.000E+00  0.000E+00   0.0E+00
   26   34  6.301E+01  0.000E+00  0.000E+00  0.000E+00  0.000E+00  0.000E+00  1.243E+01   0.0E+00
   26   35  6.266E+01  9.345E+09  3.929E-03  5.673E-03  0.000E+00  0.000E+00  3.875E+00   5.3E-01
   26   36  6.178E+01  2.499E+10  1.430E-02  2.036E-02  0.000E+00  0.000E+00  4.111E+00   4.7E-01
   26   37  5.920E+01  4.433E+10  1.664E-02  2.270E-02  0.000E+00  0.000E+00  3.965E-01   4.7E-01
   26   38  2.607E+01  0.000E+00  0.000E+00  0.000E+00  2.482E+05  6.638E-02  0.000E+00   0.0E+00
   26   39  2.600E+01  0.000E+00  0.000E+00  0.000E+00  3.914E+04  0.000E+00  0.000E+00   0.0E+00
   26   40  2.481E+01  0.000E+00  0.000E+00  0.000E+00  0.000E+00  0.000E+00  3.793E+01   0.0E+00
   26   41  2.477E+01  4.250E+08  2.791E-05  1.593E-05  0.000E+00  0.000E+00  2.548E+00   6.5E-01
   26   42  2.442E+01  5.341E+08  4.774E-05  2.686E-05  0.000E+00  0.000E+00  2.200E+01   6.9E-01
   26   43  2.441E+01  0.000E+00  0.000E+00  0.000E+00  0.000E+00  0.000E+00  1.656E+01   0.0E+00
   26   44  2.433E+01  5.496E+07  3.483E-06  1.953E-06  0.000E+00  0.000E+00  4.216E+00   9.6E-01
   26   47  2.314E+01  0.000E+00  0.000E+00  0.000E+00  1.180E+05  0.000E+00  0.000E+00   0.0E+00
   26   48  2.309E+01  0.000E+00  0.000E+00  0.000E+00  1.302E+04  2.938E+00  0.000E+00   0.0E+00
   26   49  2.306E+01  0.000E+00  0.000E+00  0.000E+00  8.098E+05  1.334E+02  0.000E+00   0.0E+00
   26   50  2.305E+01  0.000E+00  0.000E+00  0.000E+00  3.078E+05  1.471E+02  0.000E+00   0.0E+00
   26   51  2.300E+01  0.000E+00  0.000E+00  0.000E+00  1.861E+04  8.953E+01  0.000E+00   0.0E+00
   26   52  2.294E+01  0.000E+00  0.000E+00  0.000E+00  7.427E+04  5.141E+00  0.000E+00   0.0E+00
   26   53  2.273E+01  0.000E+00  0.000E+00  0.000E+00  8.130E+06  0.000E+00  0.000E+00   0.0E+00
   26   54  2.241E+01  0.000E+00  0.000E+00  0.000E+00  0.000E+00  0.000E+00  1.199E+00   0.0E+00
   26   55  2.239E+01  8.505E+09  8.219E-04  4.241E-04  0.000E+00  0.000E+00  1.482E+02   9.9E-01
   26   56  2.238E+01  3.461E+08  1.856E-05  9.572E-06  0.000E+00  0.000E+00  3.299E+02   7.1E-01
   26   57  2.237E+01  0.000E+00  0.000E+00  0.000E+00  0.000E+00  0.000E+00  1.575E+02   0.0E+00
   26   58  2.235E+01  4.433E+09  3.318E-04  1.709E-04  0.000E+00  0.000E+00  9.342E+02   1.0E+00
   26   59  2.234E+01  2.094E+08  1.119E-05  5.759E-06  0.000E+00  0.000E+00  2.370E+01   1.1E+00
   26   60  2.233E+01  3.825E+08  2.859E-05  1.471E-05  0.000E+00  0.000E+00  7.289E+02   1.1E+00
   26   62  2.231E+01  1.318E+09  1.265E-04  6.506E-05  0.000E+00  0.000E+00  6.418E+02   9.1E-01
   26   63  2.233E+01  0.000E+00  0.000E+00  0.000E+00  4.626E+08  0.000E+00  0.000E+00   0.0E+00
   26   64  2.142E+01  0.000E+00  0.000E+00  0.000E+00  0.000E+00  0.000E+00  5.302E+04   0.0E+00
   26   66  2.112E+01  0.000E+00  0.000E+00  0.000E+00  0.000E+00  0.000E+00  3.735E+04   0.0E+00
   26   67  2.110E+01  4.915E+11  2.344E-02  1.140E-02  0.000E+00  0.000E+00  1.340E+05   1.0E+00
   26   68  2.014E+01  0.000E+00  0.000E+00  0.000E+00  2.215E+08  3.552E+04  0.000E+00   0.0E+00
   26   69  2.008E+01  0.000E+00  0.000E+00  0.000E+00  1.482E+08  3.926E+03  0.000E+00   0.0E+00
   26   70  2.006E+01  0.000E+00  0.000E+00  0.000E+00  6.340E+08  4.830E+04  0.000E+00   0.0E+00
   26   71  2.000E+01  0.000E+00  0.000E+00  0.000E+00  5.840E+07  0.000E+00  0.000E+00   0.0E+00
   26   72  1.959E+01  7.203E+11  4.142E-02  1.870E-02  0.000E+00  0.000E+00  4.973E+02   9.9E-01
   26   73  1.957E+01  5.285E+10  2.168E-03  9.780E-04  0.000E+00  0.000E+00  7.366E-01   9.7E-01
   26   74  1.956E+01  1.175E+13  8.666E-01  3.906E-01  0.000E+00  0.000E+00  6.252E+06   1.0E+00
   26   75  1.956E+01  6.202E+11  3.556E-02  1.603E-02  0.000E+00  0.000E+00  9.633E+05   9.8E-01
   26   76  1.638E+01  0.000E+00  0.000E+00  0.000E+00  0.000E+00  0.000E+00  2.103E+00   0.0E+00
   26   79  1.586E+01  0.000E+00  0.000E+00  0.000E+00  3.173E+04  0.000E+00  0.000E+00   0.0E+00
   26   80  1.573E+01  0.000E+00  0.000E+00  0.000E+00  1.244E+05  2.820E+01  0.000E+00   0.0E+00
   26   81  1.568E+01  0.000E+00  0.000E+00  0.000E+00  1.916E+05  0.000E+00  0.000E+00   0.0E+00
   26   82  1.564E+01  0.000E+00  0.000E+00  0.000E+00  1.908E+04  0.000E+00  0.000E+00   0.0E+00
   26   83  1.563E+01  0.000E+00  0.000E+00  0.000E+00  8.591E+04  2.537E+01  0.000E+00   0.0E+00
   26   84  1.542E+01  0.000E+00  0.000E+00  0.000E+00  0.000E+00  0.000E+00  1.973E+01   0.0E+00
   26   85  1.542E+01  3.627E+08  9.237E-06  3.282E-06  0.000E+00  0.000E+00  1.502E-01   4.4E-01
   26   86  1.535E+01  2.235E+08  7.896E-06  2.794E-06  0.000E+00  0.000E+00  8.160E+00   5.9E-01
   26   87  1.535E+01  0.000E+00  0.000E+00  0.000E+00  0.000E+00  0.000E+00  1.265E+01   0.0E+00
   26   88  1.533E+01  8.914E+06  2.244E-07  7.928E-08  0.000E+00  0.000E+00  1.584E+00   2.9E+00
   26   90  1.517E+01  0.000E+00  0.000E+00  0.000E+00  0.000E+00  0.000E+00  7.803E+01   0.0E+00
   26   91  1.516E+01  1.012E+09  2.490E-05  8.698E-06  0.000E+00  0.000E+00  5.026E+02   1.2E-01
   26   92  1.513E+01  2.129E+07  7.307E-07  2.548E-07  0.000E+00  0.000E+00  2.982E+01   7.2E+00
   26   94  1.509E+01  0.000E+00  0.000E+00  0.000E+00  4.894E+05  0.000E+00  0.000E+00   0.0E+00
   26   95  1.508E+01  0.000E+00  0.000E+00  0.000E+00  1.298E+05  1.461E+00  0.000E+00   0.0E+00
   26   96  1.508E+01  0.000E+00  0.000E+00  0.000E+00  1.010E+05  5.158E+01  0.000E+00   0.0E+00
   26   97  1.507E+01  0.000E+00  0.000E+00  0.000E+00  1.425E+05  5.761E+01  0.000E+00   0.0E+00
   26   98  1.506E+01  0.000E+00  0.000E+00  0.000E+00  1.012E+05  9.021E+01  0.000E+00   0.0E+00
   26   99  1.508E+01  1.178E+09  2.868E-05  9.964E-06  0.000E+00  0.000E+00  9.405E+02   1.7E-02
   26  100  1.505E+01  0.000E+00  0.000E+00  0.000E+00  5.101E+03  1.078E+01  0.000E+00   0.0E+00
   26  101  1.501E+01  0.000E+00  0.000E+00  0.000E+00  1.191E+03  0.000E+00  0.000E+00   0.0E+00
   26  102  1.495E+01  0.000E+00  0.000E+00  0.000E+00  8.279E+03  4.436E-02  0.000E+00   0.0E+00
   26  103  1.494E+01  0.000E+00  0.000E+00  0.000E+00  4.892E+04  1.507E+01  0.000E+00   0.0E+00
   26  104  1.493E+01  3.091E+09  1.328E-04  4.571E-05  0.000E+00  0.000E+00  2.296E+02   9.5E-01
   26  105  1.493E+01  0.000E+00  0.000E+00  0.000E+00  0.000E+00  0.000E+00  2.701E+00   0.0E+00
   26  106  1.493E+01  0.000E+00  0.000E+00  0.000E+00  0.000E+00  0.000E+00  6.921E+01   0.0E+00
   26  107  1.492E+01  8.926E+07  2.129E-06  7.321E-07  0.000E+00  0.000E+00  2.402E+02   4.3E-02
   26  108  1.492E+01  1.014E+09  3.386E-05  1.164E-05  0.000E+00  0.000E+00  1.722E+02   1.1E+00
   26  109  1.492E+01  0.000E+00  0.000E+00  0.000E+00  1.032E+06  2.754E+00  0.000E+00   0.0E+00
   26  110  1.492E+01  4.408E+05  1.050E-08  3.611E-09  0.000E+00  0.000E+00  1.928E+02   1.7E+02
   26  111  1.492E+01  0.000E+00  0.000E+00  0.000E+00  3.190E+06  1.809E+02  0.000E+00   0.0E+00
   26  112  1.491E+01  8.020E+07  2.675E-06  9.194E-07  0.000E+00  0.000E+00  1.643E+02   2.3E+00
   26  113  1.491E+01  1.459E+09  6.255E-05  2.150E-05  0.000E+00  0.000E+00  1.503E+03   8.8E-01
   26  114  1.491E+01  0.000E+00  0.000E+00  0.000E+00  7.150E+06  0.000E+00  0.000E+00   0.0E+00
   26  116  1.490E+01  0.000E+00  0.000E+00  0.000E+00  2.433E+06  3.431E-01  0.000E+00   0.0E+00
   26  117  1.490E+01  0.000E+00  0.000E+00  0.000E+00  1.632E+06  0.000E+00  0.000E+00   0.0E+00
   26  118  1.483E+01  0.000E+00  0.000E+00  0.000E+00  6.322E+03  1.554E+01  0.000E+00   0.0E+00
   26  119  1.482E+01  0.000E+00  0.000E+00  0.000E+00  4.630E+05  7.705E+02  0.000E+00   0.0E+00
   26  120  1.481E+01  0.000E+00  0.000E+00  0.000E+00  9.514E+04  2.873E+00  0.000E+00   0.0E+00
   26  121  1.480E+01  0.000E+00  0.000E+00  0.000E+00  2.303E+05  3.046E+01  0.000E+00   0.0E+00
   26  123  1.423E+01  0.000E+00  0.000E+00  0.000E+00  2.609E+08  0.000E+00  0.000E+00   0.0E+00
   26  124  1.404E+01  0.000E+00  0.000E+00  0.000E+00  0.000E+00  0.000E+00  4.949E+04   0.0E+00
   26  126  1.398E+01  0.000E+00  0.000E+00  0.000E+00  0.000E+00  0.000E+00  3.443E+04   0.0E+00
   26  127  1.398E+01  2.041E+11  4.268E-03  1.375E-03  0.000E+00  0.000E+00  1.235E+05   1.1E+00
   26  128  1.376E+01  0.000E+00  0.000E+00  0.000E+00  1.034E+08  2.941E+04  0.000E+00   0.0E+00
   26  129  1.375E+01  0.000E+00  0.000E+00  0.000E+00  7.027E+07  3.638E+03  0.000E+00   0.0E+00
   26  130  1.374E+01  0.000E+00  0.000E+00  0.000E+00  3.027E+08  4.972E+04  0.000E+00   0.0E+00
   26  131  1.373E+01  0.000E+00  0.000E+00  0.000E+00  2.944E+07  0.000E+00  0.000E+00   0.0E+00
   26  132  1.363E+01  2.507E+11  6.984E-03  2.194E-03  0.000E+00  0.000E+00  4.295E+02   9.9E-01
   26  133  1.363E+01  1.899E+10  3.777E-04  1.186E-04  0.000E+00  0.000E+00  1.044E-05   9.3E-01
   26  134  1.362E+01  4.119E+12  1.474E-01  4.628E-02  0.000E+00  0.000E+00  4.586E+06   9.9E-01
   26  135  1.362E+01  2.221E+11  6.182E-03  1.941E-03  0.000E+00  0.000E+00  7.076E+05   9.7E-01
   26  136  1.361E+01  0.000E+00  0.000E+00  0.000E+00  7.417E+08  8.283E+02  0.000E+00   0.0E+00
   26  137  1.361E+01  0.000E+00  0.000E+00  0.000E+00  1.191E+08  1.953E+01  0.000E+00   0.0E+00
   26  138  1.361E+01  0.000E+00  0.000E+00  0.000E+00  8.465E+09  0.000E+00  0.000E+00   0.0E+00
   26  139  1.361E+01  0.000E+00  0.000E+00  0.000E+00  6.715E+08  1.516E+01  0.000E+00   0.0E+00
   27   28  3.369E+02  5.863E+03  9.977E-08  3.320E-07  0.000E+00  0.000E+00  2.114E-03   1.2E+02
   27   29  2.548E+02  1.410E+08  4.575E-04  1.151E-03  0.000E+00  0.000E+00  0.000E+00   5.8E+00
   27   30  1.290E+02  0.000E+00  0.000E+00  0.000E+00  0.000E+00  7.992E+03  0.000E+00   0.0E+00
   27   31  1.274E+02  0.000E+00  0.000E+00  0.000E+00  3.729E+00  3.504E+03  0.000E+00   0.0E+00
   27   32  1.071E+02  0.000E+00  0.000E+00  0.000E+00  8.219E+01  4.039E+02  0.000E+00   0.0E+00
   27   33  1.045E+02  0.000E+00  0.000E+00  0.000E+00  8.057E+02  6.428E+02  0.000E+00   0.0E+00
   27   34  6.543E+01  8.498E+09  5.453E-03  3.524E-03  0.000E+00  0.000E+00  2.890E-01   4.7E-01
   27   35  6.504E+01  8.516E+09  9.002E-03  5.783E-03  0.000E+00  0.000E+00  1.987E+00   3.4E-01
   27   36  6.410E+01  0.000E+00  0.000E+00  0.000E+00  0.000E+00  0.000E+00  4.358E-01   0.0E+00
   27   37  6.133E+01  5.356E+09  5.033E-03  3.049E-03  0.000E+00  0.000E+00  3.713E-01   2.1E-01
   27   38  2.647E+01  0.000E+00  0.000E+00  0.000E+00  1.604E+05  2.299E+01  0.000E+00   0.0E+00
   27   39  2.640E+01  0.000E+00  0.000E+00  0.000E+00  5.939E+06  1.877E+01  0.000E+00   0.0E+00
   27   40  2.517E+01  1.354E+08  1.286E-05  3.198E-06  0.000E+00  0.000E+00  1.640E+03   2.5E-01
   27   41  2.513E+01  5.994E+08  9.460E-05  2.348E-05  0.000E+00  0.000E+00  3.990E+01   5.3E-01
   27   42  2.477E+01  0.000E+00  0.000E+00  0.000E+00  0.000E+00  0.000E+00  4.415E+01   0.0E+00
   27   43  2.476E+01  1.432E+10  1.316E-03  3.218E-04  0.000E+00  0.000E+00  2.072E+03   5.2E-01
   27   44  2.468E+01  1.548E+07  2.355E-06  5.741E-07  0.000E+00  0.000E+00  1.681E+03   5.9E-03
   27   45  2.429E+01  1.713E+09  5.050E-05  1.212E-05  0.000E+00  0.000E+00  0.000E+00   1.5E-06
   27   46  2.351E+01  0.000E+00  0.000E+00  0.000E+00  0.000E+00  1.680E+04  0.000E+00   0.0E+00
   27   47  2.346E+01  0.000E+00  0.000E+00  0.000E+00  4.555E+05  8.286E+03  0.000E+00   0.0E+00
   27   48  2.341E+01  0.000E+00  0.000E+00  0.000E+00  1.785E+05  0.000E+00  0.000E+00   0.0E+00
   27   49  2.338E+01  0.000E+00  0.000E+00  0.000E+00  1.083E+04  1.458E+03  0.000E+00   0.0E+00
   27   51  2.332E+01  0.000E+00  0.000E+00  0.000E+00  1.238E+07  3.085E+01  0.000E+00   0.0E+00
   27   52  2.326E+01  0.000E+00  0.000E+00  0.000E+00  9.955E+04  0.000E+00  0.000E+00   0.0E+00
   27   53  2.304E+01  0.000E+00  0.000E+00  0.000E+00  8.823E+06  6.357E+02  0.000E+00   0.0E+00
   27   54  2.270E+01  1.211E+10  9.359E-04  2.099E-04  0.000E+00  0.000E+00  4.434E+01   9.2E-01
   27   56  2.268E+01  4.047E+10  5.199E-03  1.164E-03  0.000E+00  0.000E+00  2.162E+04   1.0E+00
   27   58  2.264E+01  0.000E+00  0.000E+00  0.000E+00  0.000E+00  0.000E+00  2.946E+03   0.0E+00
   27   59  2.263E+01  2.270E+11  2.906E-02  6.496E-03  0.000E+00  0.000E+00  3.983E+04   9.7E-01
   27   60  2.262E+01  0.000E+00  0.000E+00  0.000E+00  0.000E+00  0.000E+00  3.348E+04   0.0E+00
   27   61  2.265E+01  0.000E+00  0.000E+00  0.000E+00  0.000E+00  3.057E+02  0.000E+00   0.0E+00
   27   63  2.262E+01  0.000E+00  0.000E+00  0.000E+00  1.946E+08  5.692E-01  0.000E+00   0.0E+00
   27   64  2.169E+01  1.402E+11  9.886E-03  2.118E-03  0.000E+00  0.000E+00  3.395E+03   8.9E-01
   27   65  2.144E+01  6.145E+11  1.412E-02  2.990E-03  0.000E+00  0.000E+00  0.000E+00   9.4E-01
   27   66  2.139E+01  6.020E+10  4.128E-03  8.718E-04  0.000E+00  0.000E+00  1.944E+02   9.0E-01
   27   67  2.137E+01  3.598E+09  4.105E-04  8.663E-05  0.000E+00  0.000E+00  7.474E+01   1.2E+00
   27   68  2.038E+01  0.000E+00  0.000E+00  0.000E+00  2.053E+08  1.962E+03  0.000E+00   0.0E+00
   27   69  2.032E+01  0.000E+00  0.000E+00  0.000E+00  1.384E+08  2.743E+04  0.000E+00   0.0E+00
   27   70  2.030E+01  0.000E+00  0.000E+00  0.000E+00  1.715E+07  0.000E+00  0.000E+00   0.0E+00
   27   71  2.024E+01  0.000E+00  0.000E+00  0.000E+00  2.767E+08  1.566E+04  0.000E+00   0.0E+00
   27   72  1.981E+01  0.000E+00  0.000E+00  0.000E+00  0.000E+00  0.000E+00  1.144E+05   0.0E+00
   27   73  1.980E+01  9.459E+12  9.266E-01  1.812E-01  0.000E+00  0.000E+00  4.958E+05   9.9E-01
   27   75  1.978E+01  0.000E+00  0.000E+00  0.000E+00  0.000E+00  0.000E+00  7.641E+05   0.0E+00
   27   76  1.654E+01  8.251E+08  3.384E-05  5.527E-06  0.000E+00  0.000E+00  7.579E+02   1.1E+00
   27   77  1.644E+01  7.108E+09  9.606E-05  1.560E-05  0.000E+00  0.000E+00  0.000E+00   2.6E-01
   27   78  1.601E+01  0.000E+00  0.000E+00  0.000E+00  0.000E+00  1.199E+03  0.000E+00   0.0E+00
   27   79  1.601E+01  0.000E+00  0.000E+00  0.000E+00  1.055E+06  1.725E+02  0.000E+00   0.0E+00
   27   80  1.588E+01  0.000E+00  0.000E+00  0.000E+00  2.597E+05  7.558E+02  0.000E+00   0.0E+00
   27   81  1.583E+01  0.000E+00  0.000E+00  0.000E+00  1.434E+07  8.164E+02  0.000E+00   0.0E+00
   27   82  1.579E+01  0.000E+00  0.000E+00  0.000E+00  1.499E+05  1.905E+02  0.000E+00   0.0E+00
   27   83  1.578E+01  0.000E+00  0.000E+00  0.000E+00  9.326E+05  6.196E+02  0.000E+00   0.0E+00
   27   84  1.556E+01  3.481E+07  1.264E-06  1.943E-07  0.000E+00  0.000E+00  2.223E+03   1.4E-01
   27   85  1.556E+01  1.764E+07  1.067E-06  1.640E-07  0.000E+00  0.000E+00  4.075E+01   5.0E-02
   27   86  1.549E+01  0.000E+00  0.000E+00  0.000E+00  0.000E+00  0.000E+00  7.485E-03   0.0E+00
   27   87  1.548E+01  8.510E+09  3.059E-04  4.678E-05  0.000E+00  0.000E+00  3.484E+03   2.6E-01
   27   88  1.547E+01  7.828E+06  4.682E-07  7.153E-08  0.000E+00  0.000E+00  2.305E+03   1.9E+00
   27   89  1.540E+01  8.774E+09  1.039E-04  1.580E-05  0.000E+00  0.000E+00  0.000E+00   8.8E-02
   27   90  1.531E+01  5.649E+09  1.984E-04  2.999E-05  0.000E+00  0.000E+00  3.335E+02   9.8E-01
   27   91  1.529E+01  8.038E+09  4.697E-04  7.094E-05  0.000E+00  0.000E+00  5.534E+02   1.1E+00
   27   92  1.527E+01  0.000E+00  0.000E+00  0.000E+00  0.000E+00  0.000E+00  4.856E+02   0.0E+00
   27   93  1.524E+01  0.000E+00  0.000E+00  0.000E+00  0.000E+00  7.721E+03  0.000E+00   0.0E+00
   27   94  1.523E+01  0.000E+00  0.000E+00  0.000E+00  2.114E+05  4.041E+03  0.000E+00   0.0E+00
   27   95  1.522E+01  0.000E+00  0.000E+00  0.000E+00  9.622E+04  0.000E+00  0.000E+00   0.0E+00
   27   96  1.521E+01  0.000E+00  0.000E+00  0.000E+00  1.612E+04  8.455E+02  0.000E+00   0.0E+00
   27   98  1.520E+01  0.000E+00  0.000E+00  0.000E+00  6.593E+06  2.435E+01  0.000E+00   0.0E+00
   27   99  1.521E+01  1.040E+09  6.014E-05  9.035E-06  0.000E+00  0.000E+00  7.245E+02   1.1E+00
   27  100  1.519E+01  0.000E+00  0.000E+00  0.000E+00  5.904E+05  0.000E+00  0.000E+00   0.0E+00
   27  101  1.514E+01  0.000E+00  0.000E+00  0.000E+00  2.665E+06  7.388E+02  0.000E+00   0.0E+00
   27  102  1.508E+01  0.000E+00  0.000E+00  0.000E+00  1.525E+06  1.534E+02  0.000E+00   0.0E+00
   27  103  1.507E+01  0.000E+00  0.000E+00  0.000E+00  1.052E+08  0.000E+00  0.000E+00   0.0E+00
   27  105  1.506E+01  2.277E+09  7.744E-05  1.152E-05  0.000E+00  0.000E+00  6.931E+01   8.4E-01
   27  107  1.506E+01  1.675E+09  9.485E-05  1.410E-05  0.000E+00  0.000E+00  5.417E+03   1.1E+00
   27  108  1.505E+01  0.000E+00  0.000E+00  0.000E+00  0.000E+00  0.000E+00  1.326E+00   0.0E+00
   27  109  1.505E+01  0.000E+00  0.000E+00  0.000E+00  1.301E+08  0.000E+00  0.000E+00   0.0E+00
   27  110  1.505E+01  7.029E+10  3.977E-03  5.911E-04  0.000E+00  0.000E+00  3.364E+04   9.1E-01
   27  112  1.505E+01  0.000E+00  0.000E+00  0.000E+00  0.000E+00  0.000E+00  2.228E+04   0.0E+00
   27  118  1.496E+01  0.000E+00  0.000E+00  0.000E+00  4.868E+07  0.000E+00  0.000E+00   0.0E+00
   27  120  1.494E+01  0.000E+00  0.000E+00  0.000E+00  1.157E+07  1.140E+02  0.000E+00   0.0E+00
   27  121  1.493E+01  0.000E+00  0.000E+00  0.000E+00  7.781E+06  0.000E+00  0.000E+00   0.0E+00
   27  122  1.436E+01  0.000E+00  0.000E+00  0.000E+00  0.000E+00  1.433E+01  0.000E+00   0.0E+00
   27  123  1.435E+01  0.000E+00  0.000E+00  0.000E+00  1.194E+08  2.008E+00  0.000E+00   0.0E+00
   27  124  1.416E+01  6.134E+10  1.844E-03  2.578E-04  0.000E+00  0.000E+00  3.428E+03   8.0E-01
   27  125  1.411E+01  2.826E+11  2.813E-03  3.921E-04  0.000E+00  0.000E+00  0.000E+00   8.5E-01
   27  126  1.409E+01  2.669E+10  7.948E-04  1.106E-04  0.000E+00  0.000E+00  1.977E+02   8.0E-01
   27  127  1.409E+01  1.428E+09  7.083E-05  9.856E-06  0.000E+00  0.000E+00  9.897E+01   1.2E+00
   27  128  1.388E+01  0.000E+00  0.000E+00  0.000E+00  9.662E+07  1.918E+03  0.000E+00   0.0E+00
   27  129  1.386E+01  0.000E+00  0.000E+00  0.000E+00  6.566E+07  1.328E+04  0.000E+00   0.0E+00
   27  130  1.385E+01  0.000E+00  0.000E+00  0.000E+00  9.405E+06  0.000E+00  0.000E+00   0.0E+00
   27  131  1.384E+01  0.000E+00  0.000E+00  0.000E+00  1.386E+08  1.491E+04  0.000E+00   0.0E+00
   27  132  1.374E+01  0.000E+00  0.000E+00  0.000E+00  0.000E+00  0.000E+00  8.262E+04   0.0E+00
   27  133  1.374E+01  3.276E+12  1.545E-01  2.096E-02  0.000E+00  0.000E+00  3.615E+05   9.8E-01
   27  135  1.373E+01  0.000E+00  0.000E+00  0.000E+00  0.000E+00  0.000E+00  5.589E+05   0.0E+00
   27  137  1.372E+01  0.000E+00  0.000E+00  0.000E+00  6.230E+09  0.000E+00  0.000E+00   0.0E+00
   28   29  1.046E+03  0.000E+00  0.000E+00  0.000E+00  0.000E+00  8.289E-01  0.000E+00   0.0E+00
   28   30  2.089E+02  1.143E+10  2.493E-02  5.144E-02  0.000E+00  0.000E+00  0.000E+00   1.0E+00
   28   31  2.050E+02  9.164E+09  5.772E-02  1.168E-01  0.000E+00  0.000E+00  1.431E-01   1.0E+00
   28   32  1.570E+02  2.788E+10  1.718E-01  2.664E-01  0.000E+00  0.000E+00  6.538E+01   1.0E+00
   28   33  1.514E+02  7.577E+09  2.605E-02  3.895E-02  0.000E+00  0.000E+00  1.404E+02   1.0E+00
   28   34  8.119E+01  0.000E+00  0.000E+00  0.000E+00  1.256E+06  1.861E+01  0.000E+00   0.0E+00
   28   35  8.061E+01  0.000E+00  0.000E+00  0.000E+00  1.259E+06  1.314E+00  0.000E+00   0.0E+00
   28   36  7.916E+01  0.000E+00  0.000E+00  0.000E+00  1.434E+06  0.000E+00  0.000E+00   0.0E+00
   28   37  7.497E+01  0.000E+00  0.000E+00  0.000E+00  6.734E+04  1.885E+00  0.000E+00   0.0E+00
   28   38  2.873E+01  2.057E+08  4.241E-05  1.203E-05  0.000E+00  0.000E+00  2.015E+01   8.5E-01
   28   39  2.865E+01  1.766E+08  2.173E-05  6.147E-06  0.000E+00  0.000E+00  4.806E+01   8.2E-01
   28   40  2.721E+01  0.000E+00  0.000E+00  0.000E+00  3.661E+04  1.584E+02  0.000E+00   0.0E+00
   28   41  2.716E+01  0.000E+00  0.000E+00  0.000E+00  3.006E+05  1.694E+01  0.000E+00   0.0E+00
   28   42  2.674E+01  0.000E+00  0.000E+00  0.000E+00  4.823E+05  0.000E+00  0.000E+00   0.0E+00
   28   43  2.672E+01  0.000E+00  0.000E+00  0.000E+00  8.751E+04  1.774E+03  0.000E+00   0.0E+00
   28   44  2.663E+01  0.000E+00  0.000E+00  0.000E+00  3.281E+03  5.278E+01  0.000E+00   0.0E+00
   28   45  2.618E+01  0.000E+00  0.000E+00  0.000E+00  0.000E+00  1.756E+01  0.000E+00   0.0E+00
   28   46  2.527E+01  1.095E+10  3.494E-04  8.720E-05  0.000E+00  0.000E+00  0.000E+00   1.0E+00
   28   47  2.522E+01  9.038E+09  8.615E-04  2.145E-04  0.000E+00  0.000E+00  2.935E+02   1.0E+00
   28   48  2.515E+01  0.000E+00  0.000E+00  0.000E+00  0.000E+00  0.000E+00  2.913E+01   0.0E+00
   28   49  2.512E+01  3.860E+09  6.086E-04  1.510E-04  0.000E+00  0.000E+00  2.981E+01   9.9E-01
   28   51  2.505E+01  3.387E+09  5.311E-04  1.314E-04  0.000E+00  0.000E+00  3.413E+02   9.9E-01
   28   52  2.498E+01  0.000E+00  0.000E+00  0.000E+00  0.000E+00  0.000E+00  3.988E+02   0.0E+00
   28   53  2.473E+01  1.598E+09  1.466E-04  3.580E-05  0.000E+00  0.000E+00  2.903E+03   9.6E-01
   28   54  2.434E+01  0.000E+00  0.000E+00  0.000E+00  9.290E+06  2.997E-02  0.000E+00   0.0E+00
   28   56  2.431E+01  0.000E+00  0.000E+00  0.000E+00  7.549E+06  3.344E+00  0.000E+00   0.0E+00
   28   58  2.427E+01  0.000E+00  0.000E+00  0.000E+00  1.235E+06  0.000E+00  0.000E+00   0.0E+00
   28   59  2.426E+01  0.000E+00  0.000E+00  0.000E+00  1.785E+05  6.301E-01  0.000E+00   0.0E+00
   28   60  2.425E+01  0.000E+00  0.000E+00  0.000E+00  3.661E+06  0.000E+00  0.000E+00   0.0E+00
   28   61  2.429E+01  2.082E+09  6.138E-05  1.472E-05  0.000E+00  0.000E+00  0.000E+00   8.9E-01
   28   63  2.425E+01  5.410E+08  4.770E-05  1.142E-05  0.000E+00  0.000E+00  1.567E+02   8.7E-01
   28   64  2.318E+01  0.000E+00  0.000E+00  0.000E+00  2.322E+06  2.155E+03  0.000E+00   0.0E+00
   28   65  2.290E+01  0.000E+00  0.000E+00  0.000E+00  0.000E+00  1.023E+03  0.000E+00   0.0E+00
   28   66  2.283E+01  0.000E+00  0.000E+00  0.000E+00  4.491E+05  9.139E+02  0.000E+00   0.0E+00
   28   67  2.282E+01  0.000E+00  0.000E+00  0.000E+00  1.334E+06  1.288E+02  0.000E+00   0.0E+00
   28   68  2.169E+01  3.521E+08  4.141E-05  8.872E-06  0.000E+00  0.000E+00  2.756E+00   1.0E+00
   28   69  2.162E+01  1.937E+10  2.263E-03  4.832E-04  0.000E+00  0.000E+00  6.159E+03   9.9E-01
   28   70  2.160E+01  0.000E+00  0.000E+00  0.000E+00  0.000E+00  0.000E+00  5.594E+02   0.0E+00
   28   71  2.153E+01  5.115E+09  3.554E-04  7.558E-05  0.000E+00  0.000E+00  8.340E+00   1.0E+00
   28   72  2.105E+01  0.000E+00  0.000E+00  0.000E+00  1.132E+05  0.000E+00  0.000E+00   0.0E+00
   28   73  2.104E+01  0.000E+00  0.000E+00  0.000E+00  7.966E+06  1.033E+01  0.000E+00   0.0E+00
   28   75  2.102E+01  0.000E+00  0.000E+00  0.000E+00  2.187E+07  0.000E+00  0.000E+00   0.0E+00
   28   76  1.739E+01  0.000E+00  0.000E+00  0.000E+00  1.357E+02  1.919E+04  0.000E+00   0.0E+00
   28   77  1.729E+01  0.000E+00  0.000E+00  0.000E+00  0.000E+00  2.867E+04  0.000E+00   0.0E+00
   28   78  1.681E+01  2.573E+12  3.633E-02  6.032E-03  0.000E+00  0.000E+00  0.000E+00   9.9E-01
   28   79  1.681E+01  1.814E+12  7.681E-02  1.275E-02  0.000E+00  0.000E+00  5.035E+03   9.9E-01
   28   80  1.666E+01  1.238E+12  8.585E-02  1.413E-02  0.000E+00  0.000E+00  2.923E+05   9.9E-01
   28   81  1.661E+01  6.554E+11  2.710E-02  4.444E-03  0.000E+00  0.000E+00  7.059E+05   9.9E-01
   28   82  1.657E+01  1.594E+10  6.556E-04  1.073E-04  0.000E+00  0.000E+00  1.998E+05   1.0E+00
   28   83  1.655E+01  1.072E+12  7.341E-02  1.200E-02  0.000E+00  0.000E+00  2.561E+05   9.9E-01
   28   84  1.632E+01  0.000E+00  0.000E+00  0.000E+00  3.197E+06  5.318E+02  0.000E+00   0.0E+00
   28   85  1.631E+01  0.000E+00  0.000E+00  0.000E+00  2.424E+07  8.072E+01  0.000E+00   0.0E+00
   28   86  1.624E+01  0.000E+00  0.000E+00  0.000E+00  5.669E+07  0.000E+00  0.000E+00   0.0E+00
   28   87  1.623E+01  0.000E+00  0.000E+00  0.000E+00  9.296E+06  4.561E+02  0.000E+00   0.0E+00
   28   88  1.622E+01  0.000E+00  0.000E+00  0.000E+00  2.966E+04  1.650E+02  0.000E+00   0.0E+00
   28   89  1.613E+01  0.000E+00  0.000E+00  0.000E+00  0.000E+00  6.776E+01  0.000E+00   0.0E+00
   28   90  1.603E+01  0.000E+00  0.000E+00  0.000E+00  4.403E+09  1.641E+02  0.000E+00   0.0E+00
   28   91  1.602E+01  0.000E+00  0.000E+00  0.000E+00  4.278E+09  3.389E+02  0.000E+00   0.0E+00
   28   92  1.599E+01  0.000E+00  0.000E+00  0.000E+00  4.431E+09  0.000E+00  0.000E+00   0.0E+00
   28   93  1.596E+01  1.542E+10  1.963E-04  3.093E-05  0.000E+00  0.000E+00  0.000E+00   1.0E+00
   28   94  1.595E+01  1.187E+10  4.524E-04  7.125E-05  0.000E+00  0.000E+00  1.229E+03   1.0E+00
   28   95  1.594E+01  0.000E+00  0.000E+00  0.000E+00  0.000E+00  0.000E+00  3.085E+01   0.0E+00
   28   96  1.593E+01  3.965E+09  2.514E-04  3.955E-05  0.000E+00  0.000E+00  3.054E+02   9.9E-01
   28   98  1.591E+01  4.208E+09  2.663E-04  4.186E-05  0.000E+00  0.000E+00  1.011E+03   9.9E-01
   28   99  1.593E+01  0.000E+00  0.000E+00  0.000E+00  1.329E+08  1.102E+02  0.000E+00   0.0E+00
   28  100  1.590E+01  0.000E+00  0.000E+00  0.000E+00  0.000E+00  0.000E+00  4.036E+02   0.0E+00
   28  101  1.585E+01  1.635E+09  6.157E-05  9.639E-06  0.000E+00  0.000E+00  6.170E+03   9.7E-01
   28  102  1.579E+01  3.316E+05  2.065E-08  3.220E-09  0.000E+00  0.000E+00  8.914E-03   1.0E+00
   28  103  1.578E+01  0.000E+00  0.000E+00  0.000E+00  0.000E+00  0.000E+00  4.438E-02   0.0E+00
   28  105  1.577E+01  0.000E+00  0.000E+00  0.000E+00  1.721E+08  8.904E+00  0.000E+00   0.0E+00
   28  107  1.576E+01  0.000E+00  0.000E+00  0.000E+00  1.305E+08  7.744E-01  0.000E+00   0.0E+00
   28  108  1.576E+01  0.000E+00  0.000E+00  0.000E+00  9.328E+06  0.000E+00  0.000E+00   0.0E+00
   28  109  1.576E+01  0.000E+00  0.000E+00  0.000E+00  0.000E+00  0.000E+00  4.884E-01   0.0E+00
   28  110  1.575E+01  0.000E+00  0.000E+00  0.000E+00  2.286E+07  2.862E-04  0.000E+00   0.0E+00
   28  112  1.575E+01  0.000E+00  0.000E+00  0.000E+00  8.920E+07  0.000E+00  0.000E+00   0.0E+00
   28  118  1.566E+01  0.000E+00  0.000E+00  0.000E+00  0.000E+00  0.000E+00  1.443E+00   0.0E+00
   28  120  1.564E+01  6.062E+05  3.704E-08  5.721E-09  0.000E+00  0.000E+00  1.582E-01   9.8E-01
   28  121  1.562E+01  0.000E+00  0.000E+00  0.000E+00  0.000E+00  0.000E+00  1.463E-01   0.0E+00
   28  122  1.500E+01  7.146E+09  8.033E-05  1.190E-05  0.000E+00  0.000E+00  0.000E+00   9.1E-01
   28  123  1.499E+01  3.890E+09  1.311E-04  1.942E-05  0.000E+00  0.000E+00  2.262E+03   9.1E-01
   28  124  1.478E+01  0.000E+00  0.000E+00  0.000E+00  8.333E+06  1.197E+03  0.000E+00   0.0E+00
   28  125  1.473E+01  0.000E+00  0.000E+00  0.000E+00  0.000E+00  1.741E+03  0.000E+00   0.0E+00
   28  126  1.471E+01  0.000E+00  0.000E+00  0.000E+00  1.142E+06  4.117E+02  0.000E+00   0.0E+00
   28  127  1.471E+01  0.000E+00  0.000E+00  0.000E+00  4.907E+06  2.181E+02  0.000E+00   0.0E+00
   28  128  1.447E+01  2.856E+08  1.494E-05  2.136E-06  0.000E+00  0.000E+00  1.679E+01   1.0E+00
   28  129  1.445E+01  1.324E+10  6.910E-04  9.864E-05  0.000E+00  0.000E+00  8.421E+03   9.9E-01
   28  130  1.445E+01  0.000E+00  0.000E+00  0.000E+00  0.000E+00  0.000E+00  5.724E+02   0.0E+00
   28  131  1.444E+01  4.073E+09  1.273E-04  1.815E-05  0.000E+00  0.000E+00  1.869E-01   1.0E+00
   28  132  1.433E+01  0.000E+00  0.000E+00  0.000E+00  6.672E+03  0.000E+00  0.000E+00   0.0E+00
   28  133  1.432E+01  0.000E+00  0.000E+00  0.000E+00  1.340E+05  5.274E+00  0.000E+00   0.0E+00
   28  135  1.432E+01  0.000E+00  0.000E+00  0.000E+00  3.273E+05  0.000E+00  0.000E+00   0.0E+00
   28  137  1.430E+01  0.000E+00  0.000E+00  0.000E+00  0.000E+00  0.000E+00  2.501E-02   0.0E+00
   29   31  2.549E+02  1.440E+09  4.208E-02  3.532E-02  0.000E+00  0.000E+00  0.000E+00   9.8E-01
   29   32  1.848E+02  0.000E+00  0.000E+00  0.000E+00  0.000E+00  0.000E+00  2.049E+01   0.0E+00
   29   33  1.771E+02  1.347E+10  1.900E-01  1.107E-01  0.000E+00  0.000E+00  0.000E+00   1.0E+00
   29   34  8.803E+01  0.000E+00  0.000E+00  0.000E+00  0.000E+00  2.998E+00  0.000E+00   0.0E+00
   29   35  8.734E+01  0.000E+00  0.000E+00  0.000E+00  3.070E+04  0.000E+00  0.000E+00   0.0E+00
   29   37  8.077E+01  0.000E+00  0.000E+00  0.000E+00  1.295E+06  0.000E+00  0.000E+00   0.0E+00
   29   38  2.954E+01  0.000E+00  0.000E+00  0.000E+00  0.000E+00  0.000E+00  2.612E+02   0.0E+00
   29   39  2.945E+01  2.392E+09  9.335E-04  9.052E-05  0.000E+00  0.000E+00  0.000E+00   6.8E-01
   29   40  2.793E+01  0.000E+00  0.000E+00  0.000E+00  0.000E+00  1.132E+03  0.000E+00   0.0E+00
   29   41  2.788E+01  0.000E+00  0.000E+00  0.000E+00  4.873E+05  0.000E+00  0.000E+00   0.0E+00
   29   43  2.742E+01  0.000E+00  0.000E+00  0.000E+00  0.000E+00  1.398E+01  0.000E+00   0.0E+00
   29   44  2.732E+01  0.000E+00  0.000E+00  0.000E+00  5.073E+05  0.000E+00  0.000E+00   0.0E+00
   29   47  2.584E+01  3.350E+06  1.006E-06  8.555E-08  0.000E+00  0.000E+00  0.000E+00   2.3E+00
   29   49  2.574E+01  0.000E+00  0.000E+00  0.000E+00  0.000E+00  0.000E+00  2.502E+02   0.0E+00
   29   51  2.567E+01  0.000E+00  0.000E+00  0.000E+00  0.000E+00  0.000E+00  7.717E+02   0.0E+00
   29   53  2.533E+01  8.102E+09  2.338E-03  1.950E-04  0.000E+00  0.000E+00  0.000E+00   1.4E+00
   29   54  2.492E+01  0.000E+00  0.000E+00  0.000E+00  0.000E+00  6.232E-02  0.000E+00   0.0E+00
   29   56  2.489E+01  0.000E+00  0.000E+00  0.000E+00  9.026E+04  0.000E+00  0.000E+00   0.0E+00
   29   59  2.484E+01  0.000E+00  0.000E+00  0.000E+00  1.325E+06  0.000E+00  0.000E+00   0.0E+00
   29   63  2.483E+01  1.016E+09  2.817E-04  2.302E-05  0.000E+00  0.000E+00  0.000E+00   4.6E-01
   29   64  2.371E+01  0.000E+00  0.000E+00  0.000E+00  0.000E+00  6.503E+00  0.000E+00   0.0E+00
   29   66  2.334E+01  0.000E+00  0.000E+00  0.000E+00  0.000E+00  1.444E+03  0.000E+00   0.0E+00
   29   67  2.333E+01  0.000E+00  0.000E+00  0.000E+00  1.279E+06  0.000E+00  0.000E+00   0.0E+00
   29   68  2.215E+01  0.000E+00  0.000E+00  0.000E+00  0.000E+00  0.000E+00  2.817E+01   0.0E+00
   29   69  2.208E+01  0.000E+00  0.000E+00  0.000E+00  0.000E+00  0.000E+00  5.814E+02   0.0E+00
   29   71  2.198E+01  9.489E+09  2.062E-03  1.492E-04  0.000E+00  0.000E+00  0.000E+00   1.3E+00
   29   73  2.147E+01  0.000E+00  0.000E+00  0.000E+00  2.460E+06  0.000E+00  0.000E+00   0.0E+00
   29   76  1.769E+01  0.000E+00  0.000E+00  0.000E+00  0.000E+00  1.043E+04  0.000E+00   0.0E+00
   29   79  1.708E+01  6.806E+11  8.931E-02  5.022E-03  0.000E+00  0.000E+00  0.000E+00   9.9E-01
   29   80  1.693E+01  0.000E+00  0.000E+00  0.000E+00  0.000E+00  0.000E+00  2.097E+05   0.0E+00
   29   81  1.687E+01  1.204E+12  1.541E-01  8.563E-03  0.000E+00  0.000E+00  0.000E+00   9.8E-01
   29   82  1.683E+01  5.394E+11  6.873E-02  3.808E-03  0.000E+00  0.000E+00  0.000E+00   1.0E+00
   29   83  1.682E+01  0.000E+00  0.000E+00  0.000E+00  0.000E+00  0.000E+00  1.572E+05   0.0E+00
   29   84  1.658E+01  0.000E+00  0.000E+00  0.000E+00  0.000E+00  1.838E+02  0.000E+00   0.0E+00
   29   85  1.657E+01  0.000E+00  0.000E+00  0.000E+00  1.359E+07  0.000E+00  0.000E+00   0.0E+00
   29   87  1.649E+01  0.000E+00  0.000E+00  0.000E+00  0.000E+00  1.308E+01  0.000E+00   0.0E+00
   29   88  1.647E+01  0.000E+00  0.000E+00  0.000E+00  1.818E+07  0.000E+00  0.000E+00   0.0E+00
   29   90  1.628E+01  0.000E+00  0.000E+00  0.000E+00  0.000E+00  3.290E+02  0.000E+00   0.0E+00
   29   91  1.627E+01  0.000E+00  0.000E+00  0.000E+00  1.452E+08  0.000E+00  0.000E+00   0.0E+00
   29   94  1.619E+01  1.844E+06  2.174E-07  1.159E-08  0.000E+00  0.000E+00  0.000E+00   2.2E+00
   29   96  1.618E+01  0.000E+00  0.000E+00  0.000E+00  0.000E+00  0.000E+00  3.513E+00   0.0E+00
   29   98  1.616E+01  0.000E+00  0.000E+00  0.000E+00  0.000E+00  0.000E+00  3.274E+02   0.0E+00
   29   99  1.618E+01  0.000E+00  0.000E+00  0.000E+00  4.314E+09  0.000E+00  0.000E+00   0.0E+00
   29  101  1.609E+01  5.862E+08  6.829E-05  3.618E-06  0.000E+00  0.000E+00  0.000E+00   2.1E+00
   29  102  1.603E+01  0.000E+00  0.000E+00  0.000E+00  0.000E+00  0.000E+00  7.891E-02   0.0E+00
   29  105  1.601E+01  0.000E+00  0.000E+00  0.000E+00  0.000E+00  8.806E+00  0.000E+00   0.0E+00
   29  107  1.600E+01  0.000E+00  0.000E+00  0.000E+00  1.960E+06  0.000E+00  0.000E+00   0.0E+00
   29  110  1.599E+01  0.000E+00  0.000E+00  0.000E+00  4.018E+07  0.000E+00  0.000E+00   0.0E+00
   29  120  1.588E+01  0.000E+00  0.000E+00  0.000E+00  0.000E+00  0.000E+00  3.674E-01   0.0E+00
   29  123  1.521E+01  1.828E+08  1.902E-05  9.526E-07  0.000E+00  0.000E+00  0.000E+00   5.4E-05
   29  124  1.499E+01  0.000E+00  0.000E+00  0.000E+00  0.000E+00  1.740E+01  0.000E+00   0.0E+00
   29  126  1.492E+01  0.000E+00  0.000E+00  0.000E+00  0.000E+00  4.581E+02  0.000E+00   0.0E+00
   29  127  1.492E+01  0.000E+00  0.000E+00  0.000E+00  5.991E+04  0.000E+00  0.000E+00   0.0E+00
   29  128  1.467E+01  0.000E+00  0.000E+00  0.000E+00  0.000E+00  0.000E+00  4.984E+01   0.0E+00
   29  129  1.466E+01  0.000E+00  0.000E+00  0.000E+00  0.000E+00  0.000E+00  2.641E+02   0.0E+00
   29  131  1.464E+01  2.333E+09  2.249E-04  1.084E-05  0.000E+00  0.000E+00  0.000E+00   1.3E+00
   29  133  1.452E+01  0.000E+00  0.000E+00  0.000E+00  5.818E+04  0.000E+00  0.000E+00   0.0E+00
   30   31  1.076E+04  0.000E+00  0.000E+00  0.000E+00  0.000E+00  1.072E+01  0.000E+00   0.0E+00
   30   32  6.320E+02  0.000E+00  0.000E+00  0.000E+00  2.446E+01  0.000E+00  0.000E+00   0.0E+00
   30   33  5.500E+02  0.000E+00  0.000E+00  0.000E+00  0.000E+00  2.688E+04  0.000E+00   0.0E+00
   30   34  1.328E+02  2.160E+10  1.713E-01  7.488E-02  0.000E+00  0.000E+00  0.000E+00   1.1E+00
   30   35  1.312E+02  0.000E+00  0.000E+00  0.000E+00  0.000E+00  0.000E+00  1.057E+00   0.0E+00
   30   37  1.169E+02  0.000E+00  0.000E+00  0.000E+00  0.000E+00  0.000E+00  6.875E+01   0.0E+00
   30   38  3.330E+01  0.000E+00  0.000E+00  0.000E+00  1.460E+03  0.000E+00  0.000E+00   0.0E+00
   30   39  3.320E+01  0.000E+00  0.000E+00  0.000E+00  0.000E+00  8.245E+02  0.000E+00   0.0E+00
   30   40  3.128E+01  3.655E+07  1.608E-05  1.656E-06  0.000E+00  0.000E+00  0.000E+00   1.2E-02
   30   41  3.122E+01  0.000E+00  0.000E+00  0.000E+00  0.000E+00  0.000E+00  2.607E-02   0.0E+00
   30   43  3.064E+01  7.994E+05  3.376E-07  3.406E-08  0.000E+00  0.000E+00  0.000E+00   8.0E+00
   30   44  3.052E+01  0.000E+00  0.000E+00  0.000E+00  0.000E+00  0.000E+00  3.694E+00   0.0E+00
   30   47  2.868E+01  0.000E+00  0.000E+00  0.000E+00  0.000E+00  5.969E+01  0.000E+00   0.0E+00
   30   49  2.855E+01  0.000E+00  0.000E+00  0.000E+00  6.937E+04  0.000E+00  0.000E+00   0.0E+00
   30   51  2.847E+01  0.000E+00  0.000E+00  0.000E+00  1.055E+02  0.000E+00  0.000E+00   0.0E+00
   30   53  2.805E+01  0.000E+00  0.000E+00  0.000E+00  0.000E+00  1.308E+00  0.000E+00   0.0E+00
   30   54  2.756E+01  1.184E+10  4.043E-03  3.668E-04  0.000E+00  0.000E+00  0.000E+00   1.1E+00
   30   56  2.751E+01  0.000E+00  0.000E+00  0.000E+00  0.000E+00  0.000E+00  1.143E+01   0.0E+00
   30   59  2.745E+01  0.000E+00  0.000E+00  0.000E+00  0.000E+00  0.000E+00  4.282E+02   0.0E+00
   30   63  2.743E+01  0.000E+00  0.000E+00  0.000E+00  0.000E+00  6.717E+01  0.000E+00   0.0E+00
   30   64  2.607E+01  5.896E+08  1.803E-04  1.548E-05  0.000E+00  0.000E+00  0.000E+00   4.5E-01
   30   66  2.564E+01  1.056E+09  3.122E-04  2.635E-05  0.000E+00  0.000E+00  0.000E+00   6.3E-01
   30   67  2.561E+01  0.000E+00  0.000E+00  0.000E+00  0.000E+00  0.000E+00  1.640E+02   0.0E+00
   30   68  2.421E+01  0.000E+00  0.000E+00  0.000E+00  1.034E+06  0.000E+00  0.000E+00   0.0E+00
   30   69  2.412E+01  0.000E+00  0.000E+00  0.000E+00  1.127E+06  0.000E+00  0.000E+00   0.0E+00
   30   71  2.400E+01  0.000E+00  0.000E+00  0.000E+00  0.000E+00  4.104E+00  0.000E+00   0.0E+00
   30   73  2.339E+01  0.000E+00  0.000E+00  0.000E+00  0.000E+00  0.000E+00  1.681E-01   0.0E+00
   30   76  1.897E+01  3.021E+11  4.891E-02  3.055E-03  0.000E+00  0.000E+00  0.000E+00   9.9E-01
   30   79  1.828E+01  0.000E+00  0.000E+00  0.000E+00  0.000E+00  7.078E+03  0.000E+00   0.0E+00
   30   80  1.810E+01  0.000E+00  0.000E+00  0.000E+00  2.682E+08  0.000E+00  0.000E+00   0.0E+00
   30   81  1.804E+01  0.000E+00  0.000E+00  0.000E+00  0.000E+00  2.358E+05  0.000E+00   0.0E+00
   30   82  1.799E+01  0.000E+00  0.000E+00  0.000E+00  0.000E+00  5.073E+04  0.000E+00   0.0E+00
   30   83  1.798E+01  0.000E+00  0.000E+00  0.000E+00  2.227E+08  0.000E+00  0.000E+00   0.0E+00
   30   84  1.770E+01  8.490E+08  1.196E-04  6.969E-06  0.000E+00  0.000E+00  0.000E+00   3.8E-01
   30   85  1.770E+01  0.000E+00  0.000E+00  0.000E+00  0.000E+00  0.000E+00  6.189E+01   0.0E+00
   30   87  1.760E+01  1.144E+10  1.593E-03  9.229E-05  0.000E+00  0.000E+00  0.000E+00   1.1E+00
   30   88  1.758E+01  0.000E+00  0.000E+00  0.000E+00  0.000E+00  0.000E+00  8.832E+02   0.0E+00
   30   90  1.737E+01  3.023E+12  4.101E-01  2.345E-02  0.000E+00  0.000E+00  0.000E+00   9.8E-01
   30   91  1.735E+01  0.000E+00  0.000E+00  0.000E+00  0.000E+00  0.000E+00  1.263E+04   0.0E+00
   30   94  1.726E+01  0.000E+00  0.000E+00  0.000E+00  0.000E+00  2.467E+01  0.000E+00   0.0E+00
   30   96  1.724E+01  0.000E+00  0.000E+00  0.000E+00  7.418E+04  0.000E+00  0.000E+00   0.0E+00
   30   98  1.723E+01  0.000E+00  0.000E+00  0.000E+00  3.563E+05  0.000E+00  0.000E+00   0.0E+00
   30   99  1.725E+01  0.000E+00  0.000E+00  0.000E+00  0.000E+00  0.000E+00  2.937E+05   0.0E+00
   30  101  1.715E+01  0.000E+00  0.000E+00  0.000E+00  0.000E+00  1.473E+02  0.000E+00   0.0E+00
   30  102  1.708E+01  0.000E+00  0.000E+00  0.000E+00  7.304E+08  0.000E+00  0.000E+00   0.0E+00
   30  105  1.705E+01  7.768E+10  1.016E-02  5.702E-04  0.000E+00  0.000E+00  0.000E+00   9.4E-01
   30  107  1.705E+01  0.000E+00  0.000E+00  0.000E+00  0.000E+00  0.000E+00  2.425E+03   0.0E+00
   30  110  1.704E+01  0.000E+00  0.000E+00  0.000E+00  0.000E+00  0.000E+00  2.344E+03   0.0E+00
   30  120  1.690E+01  0.000E+00  0.000E+00  0.000E+00  3.004E+09  0.000E+00  0.000E+00   0.0E+00
   30  123  1.615E+01  0.000E+00  0.000E+00  0.000E+00  0.000E+00  3.507E+01  0.000E+00   0.0E+00
   30  124  1.591E+01  3.352E+09  3.814E-04  1.997E-05  0.000E+00  0.000E+00  0.000E+00   7.2E-01
   30  126  1.582E+01  2.603E+09  2.931E-04  1.527E-05  0.000E+00  0.000E+00  0.000E+00   6.8E-01
   30  127  1.582E+01  0.000E+00  0.000E+00  0.000E+00  0.000E+00  0.000E+00  7.781E+02   0.0E+00
   30  128  1.555E+01  0.000E+00  0.000E+00  0.000E+00  2.911E+05  0.000E+00  0.000E+00   0.0E+00
   30  129  1.553E+01  0.000E+00  0.000E+00  0.000E+00  5.630E+05  0.000E+00  0.000E+00   0.0E+00
   30  131  1.551E+01  0.000E+00  0.000E+00  0.000E+00  0.000E+00  2.603E-01  0.000E+00   0.0E+00
   30  133  1.538E+01  0.000E+00  0.000E+00  0.000E+00  0.000E+00  0.000E+00  4.989E-01   0.0E+00
   31   32  6.715E+02  0.000E+00  0.000E+00  0.000E+00  3.056E+01  3.325E+04  0.000E+00   0.0E+00
   31   33  5.797E+02  0.000E+00  0.000E+00  0.000E+00  7.963E+01  1.298E+04  0.000E+00   0.0E+00
   31   34  1.344E+02  1.155E+10  3.131E-02  4.157E-02  0.000E+00  0.000E+00  7.725E+00   1.1E+00
   31   35  1.329E+02  2.705E+10  1.193E-01  1.565E-01  0.000E+00  0.000E+00  2.001E+01   1.1E+00
   31   36  1.290E+02  0.000E+00  0.000E+00  0.000E+00  0.000E+00  0.000E+00  5.268E+01   0.0E+00
   31   37  1.182E+02  6.968E+09  2.433E-02  2.841E-02  0.000E+00  0.000E+00  3.519E+01   9.9E-01
   31   38  3.341E+01  0.000E+00  0.000E+00  0.000E+00  3.000E+03  3.980E+02  0.000E+00   0.0E+00
   31   39  3.330E+01  0.000E+00  0.000E+00  0.000E+00  9.484E+03  2.330E+02  0.000E+00   0.0E+00
   31   40  3.137E+01  9.958E+07  1.469E-05  4.551E-06  0.000E+00  0.000E+00  4.612E+00   2.3E-04
   31   41  3.131E+01  7.652E+07  1.874E-05  5.794E-06  0.000E+00  0.000E+00  1.574E+00   4.1E-01
   31   42  3.075E+01  0.000E+00  0.000E+00  0.000E+00  0.000E+00  0.000E+00  2.921E+01   0.0E+00
   31   43  3.073E+01  1.787E+08  2.530E-05  7.679E-06  0.000E+00  0.000E+00  3.297E+01   1.3E+00
   31   44  3.060E+01  2.288E+08  5.355E-05  1.619E-05  0.000E+00  0.000E+00  2.734E+01   3.9E-01
   31   45  3.001E+01  2.643E+09  1.190E-04  3.526E-05  0.000E+00  0.000E+00  0.000E+00   1.2E+00
   31   46  2.883E+01  0.000E+00  0.000E+00  0.000E+00  0.000E+00  3.278E+00  0.000E+00   0.0E+00
   31   47  2.875E+01  0.000E+00  0.000E+00  0.000E+00  6.148E+04  5.156E+01  0.000E+00   0.0E+00
   31   48  2.867E+01  0.000E+00  0.000E+00  0.000E+00  4.216E+05  0.000E+00  0.000E+00   0.0E+00
   31   49  2.863E+01  0.000E+00  0.000E+00  0.000E+00  5.209E+03  1.098E+02  0.000E+00   0.0E+00
   31   51  2.854E+01  0.000E+00  0.000E+00  0.000E+00  3.391E+05  1.004E+02  0.000E+00   0.0E+00
   31   52  2.845E+01  0.000E+00  0.000E+00  0.000E+00  9.091E+04  0.000E+00  0.000E+00   0.0E+00
   31   53  2.813E+01  0.000E+00  0.000E+00  0.000E+00  5.049E+05  5.641E-01  0.000E+00   0.0E+00
   31   54  2.762E+01  6.410E+09  7.333E-04  2.001E-04  0.000E+00  0.000E+00  2.253E+02   1.1E+00
   31   56  2.758E+01  6.723E+09  1.278E-03  3.482E-04  0.000E+00  0.000E+00  2.556E+02   1.1E+00
   31   58  2.754E+01  0.000E+00  0.000E+00  0.000E+00  0.000E+00  0.000E+00  4.789E+00   0.0E+00
   31   59  2.752E+01  1.729E+09  3.272E-04  8.894E-05  0.000E+00  0.000E+00  1.363E+02   1.1E+00
   31   60  2.751E+01  0.000E+00  0.000E+00  0.000E+00  0.000E+00  0.000E+00  3.257E+02   0.0E+00
   31   61  2.755E+01  0.000E+00  0.000E+00  0.000E+00  0.000E+00  1.936E+03  0.000E+00   0.0E+00
   31   63  2.750E+01  0.000E+00  0.000E+00  0.000E+00  1.101E+04  3.783E+02  0.000E+00   0.0E+00
   31   64  2.614E+01  6.680E+08  6.841E-05  1.766E-05  0.000E+00  0.000E+00  2.043E-02   6.5E-01
   31   65  2.578E+01  1.369E+08  4.546E-06  1.158E-06  0.000E+00  0.000E+00  0.000E+00   8.4E+00
   31   66  2.570E+01  2.326E+08  2.303E-05  5.844E-06  0.000E+00  0.000E+00  2.218E+02   1.0E+00
   31   67  2.567E+01  7.116E+08  1.172E-04  2.972E-05  0.000E+00  0.000E+00  4.142E+01   4.6E-01
   31   68  2.426E+01  0.000E+00  0.000E+00  0.000E+00  1.338E+06  5.143E-03  0.000E+00   0.0E+00
   31   69  2.417E+01  0.000E+00  0.000E+00  0.000E+00  6.275E+05  1.635E+02  0.000E+00   0.0E+00
   31   70  2.414E+01  0.000E+00  0.000E+00  0.000E+00  5.333E+05  0.000E+00  0.000E+00   0.0E+00
   31   71  2.406E+01  0.000E+00  0.000E+00  0.000E+00  3.939E+04  1.193E+01  0.000E+00   0.0E+00
   31   72  2.346E+01  0.000E+00  0.000E+00  0.000E+00  0.000E+00  0.000E+00  1.649E+02   0.0E+00
   31   73  2.344E+01  2.712E+10  3.724E-03  8.623E-04  0.000E+00  0.000E+00  9.682E+02   1.0E+00
   31   75  2.342E+01  0.000E+00  0.000E+00  0.000E+00  0.000E+00  0.000E+00  1.760E+03   0.0E+00
   31   76  1.900E+01  6.854E+11  3.711E-02  6.966E-03  0.000E+00  0.000E+00  2.136E+03   9.9E-01
   31   77  1.888E+01  6.585E+11  1.173E-02  2.187E-03  0.000E+00  0.000E+00  0.000E+00   9.7E-01
   31   78  1.831E+01  0.000E+00  0.000E+00  0.000E+00  0.000E+00  5.419E-01  0.000E+00   0.0E+00
   31   79  1.831E+01  0.000E+00  0.000E+00  0.000E+00  3.167E+07  7.395E+03  0.000E+00   0.0E+00
   31   80  1.814E+01  0.000E+00  0.000E+00  0.000E+00  4.516E+08  2.351E+05  0.000E+00   0.0E+00
   31   81  1.807E+01  0.000E+00  0.000E+00  0.000E+00  8.252E+08  1.039E+05  0.000E+00   0.0E+00
   31   82  1.802E+01  0.000E+00  0.000E+00  0.000E+00  2.062E+08  3.303E+04  0.000E+00   0.0E+00
   31   83  1.801E+01  0.000E+00  0.000E+00  0.000E+00  3.749E+08  2.072E+05  0.000E+00   0.0E+00
   31   84  1.773E+01  5.088E+09  2.397E-04  4.197E-05  0.000E+00  0.000E+00  3.705E+01   1.4E+00
   31   85  1.773E+01  3.639E+10  2.857E-03  5.002E-04  0.000E+00  0.000E+00  7.805E+02   1.0E+00
   31   86  1.764E+01  0.000E+00  0.000E+00  0.000E+00  0.000E+00  0.000E+00  4.636E+03   0.0E+00
   31   87  1.763E+01  4.759E+08  2.217E-05  3.859E-06  0.000E+00  0.000E+00  3.520E+02   7.5E-01
   31   88  1.761E+01  3.459E+09  2.680E-04  4.661E-05  0.000E+00  0.000E+00  1.118E+02   1.3E+00
   31   89  1.751E+01  9.227E+07  1.414E-06  2.445E-07  0.000E+00  0.000E+00  0.000E+00   1.5E+00
   31   90  1.739E+01  1.705E+12  7.735E-02  1.329E-02  0.000E+00  0.000E+00  6.564E+04   9.8E-01
   31   91  1.738E+01  3.736E+12  2.819E-01  4.838E-02  0.000E+00  0.000E+00  1.944E+05   9.8E-01
   31   92  1.734E+01  0.000E+00  0.000E+00  0.000E+00  0.000E+00  0.000E+00  3.909E+05   0.0E+00
   31   93  1.731E+01  0.000E+00  0.000E+00  0.000E+00  0.000E+00  1.971E+00  0.000E+00   0.0E+00
   31   94  1.729E+01  0.000E+00  0.000E+00  0.000E+00  5.367E+05  2.919E+01  0.000E+00   0.0E+00
   31   95  1.728E+01  0.000E+00  0.000E+00  0.000E+00  1.678E+06  0.000E+00  0.000E+00   0.0E+00
   31   96  1.727E+01  0.000E+00  0.000E+00  0.000E+00  4.633E+05  4.737E+01  0.000E+00   0.0E+00
   31   98  1.725E+01  0.000E+00  0.000E+00  0.000E+00  1.524E+05  1.584E+00  0.000E+00   0.0E+00
   31   99  1.727E+01  7.001E+11  5.219E-02  8.903E-03  0.000E+00  0.000E+00  1.502E+05   9.9E-01
   31  100  1.724E+01  0.000E+00  0.000E+00  0.000E+00  9.332E+05  0.000E+00  0.000E+00   0.0E+00
   31  101  1.718E+01  0.000E+00  0.000E+00  0.000E+00  9.454E+05  1.328E+02  0.000E+00   0.0E+00
   31  102  1.710E+01  0.000E+00  0.000E+00  0.000E+00  5.465E+08  6.012E+00  0.000E+00   0.0E+00
   31  103  1.709E+01  0.000E+00  0.000E+00  0.000E+00  1.828E+08  0.000E+00  0.000E+00   0.0E+00
   31  105  1.708E+01  4.414E+10  1.930E-03  3.256E-04  0.000E+00  0.000E+00  1.378E+03   9.4E-01
   31  107  1.707E+01  4.998E+10  3.640E-03  6.137E-04  0.000E+00  0.000E+00  6.769E+03   9.4E-01
   31  108  1.707E+01  0.000E+00  0.000E+00  0.000E+00  0.000E+00  0.000E+00  1.329E+03   0.0E+00
   31  109  1.707E+01  0.000E+00  0.000E+00  0.000E+00  6.614E+08  0.000E+00  0.000E+00   0.0E+00
   31  110  1.706E+01  2.406E+08  1.750E-05  2.950E-06  0.000E+00  0.000E+00  2.777E+03   1.0E+00
   31  112  1.706E+01  0.000E+00  0.000E+00  0.000E+00  0.000E+00  0.000E+00  5.575E+03   0.0E+00
   31  118  1.695E+01  0.000E+00  0.000E+00  0.000E+00  5.051E+09  0.000E+00  0.000E+00   0.0E+00
   31  120  1.693E+01  0.000E+00  0.000E+00  0.000E+00  2.240E+09  1.818E+01  0.000E+00   0.0E+00
   31  121  1.691E+01  0.000E+00  0.000E+00  0.000E+00  2.696E+07  0.000E+00  0.000E+00   0.0E+00
   31  122  1.618E+01  0.000E+00  0.000E+00  0.000E+00  0.000E+00  4.417E+02  0.000E+00   0.0E+00
   31  123  1.618E+01  0.000E+00  0.000E+00  0.000E+00  9.152E+05  1.184E+01  0.000E+00   0.0E+00
   31  124  1.593E+01  3.203E+09  1.218E-04  1.917E-05  0.000E+00  0.000E+00  4.672E+01   8.6E-01
   31  125  1.587E+01  1.153E+08  1.451E-06  2.275E-07  0.000E+00  0.000E+00  0.000E+00   2.2E+00
   31  126  1.585E+01  3.259E+08  1.227E-05  1.920E-06  0.000E+00  0.000E+00  2.236E+02   1.0E+00
   31  127  1.584E+01  1.217E+09  7.631E-05  1.194E-05  0.000E+00  0.000E+00  5.551E+02   5.0E-01
   31  128  1.557E+01  0.000E+00  0.000E+00  0.000E+00  5.732E+05  1.301E+01  0.000E+00   0.0E+00
   31  129  1.555E+01  0.000E+00  0.000E+00  0.000E+00  4.976E+05  5.038E+00  0.000E+00   0.0E+00
   31  130  1.555E+01  0.000E+00  0.000E+00  0.000E+00  8.693E+03  0.000E+00  0.000E+00   0.0E+00
   31  131  1.553E+01  0.000E+00  0.000E+00  0.000E+00  1.909E+03  3.392E+00  0.000E+00   0.0E+00
   31  132  1.540E+01  0.000E+00  0.000E+00  0.000E+00  0.000E+00  0.000E+00  1.738E+02   0.0E+00
   31  133  1.540E+01  5.024E+09  2.977E-04  4.527E-05  0.000E+00  0.000E+00  5.552E+02   1.1E+00
   31  135  1.539E+01  0.000E+00  0.000E+00  0.000E+00  0.000E+00  0.000E+00  6.233E+02   0.0E+00
   31  137  1.537E+01  0.000E+00  0.000E+00  0.000E+00  5.056E+07  0.000E+00  0.000E+00   0.0E+00
   32   33  4.238E+03  0.000E+00  0.000E+00  0.000E+00  1.746E-03  7.155E+01  0.000E+00   0.0E+00
   32   34  1.681E+02  5.227E+08  1.329E-03  3.677E-03  0.000E+00  0.000E+00  2.656E-03   1.2E+00
   32   35  1.656E+02  4.796E+09  1.972E-02  5.377E-02  0.000E+00  0.000E+00  6.643E+00   1.1E+00
   32   36  1.596E+02  2.256E+10  1.207E-01  3.171E-01  0.000E+00  0.000E+00  9.931E+01   1.1E+00
   32   37  1.435E+02  2.571E+08  7.933E-04  1.874E-03  0.000E+00  0.000E+00  4.982E+01   1.2E+00
   32   38  3.516E+01  0.000E+00  0.000E+00  0.000E+00  7.881E+03  2.029E+00  0.000E+00   0.0E+00
   32   39  3.504E+01  0.000E+00  0.000E+00  0.000E+00  5.276E+03  4.771E+00  0.000E+00   0.0E+00
   32   40  3.291E+01  6.167E+08  6.007E-05  3.254E-05  0.000E+00  0.000E+00  1.328E+01   1.0E+00
   32   41  3.284E+01  5.546E+08  8.965E-05  4.846E-05  0.000E+00  0.000E+00  1.928E+00   4.1E-01
   32   42  3.222E+01  6.872E+08  1.498E-04  7.944E-05  0.000E+00  0.000E+00  2.123E+00   3.7E-01
   32   43  3.221E+01  8.384E+06  7.821E-07  4.146E-07  0.000E+00  0.000E+00  7.861E+01   2.6E+00
   32   44  3.207E+01  9.353E+08  1.442E-04  7.610E-05  0.000E+00  0.000E+00  8.527E+01   4.1E-01
   32   45  3.142E+01  0.000E+00  0.000E+00  0.000E+00  0.000E+00  0.000E+00  5.942E+02   0.0E+00
   32   46  3.012E+01  0.000E+00  0.000E+00  0.000E+00  8.325E+05  0.000E+00  0.000E+00   0.0E+00
   32   47  3.004E+01  0.000E+00  0.000E+00  0.000E+00  7.498E+05  2.984E+02  0.000E+00   0.0E+00
   32   48  2.995E+01  0.000E+00  0.000E+00  0.000E+00  3.226E+05  5.264E+00  0.000E+00   0.0E+00
   32   49  2.990E+01  0.000E+00  0.000E+00  0.000E+00  6.066E+05  3.015E+01  0.000E+00   0.0E+00
   32   50  2.989E+01  0.000E+00  0.000E+00  0.000E+00  9.606E+05  0.000E+00  0.000E+00   0.0E+00
   32   51  2.981E+01  0.000E+00  0.000E+00  0.000E+00  1.628E+04  4.174E+00  0.000E+00   0.0E+00
   32   52  2.971E+01  0.000E+00  0.000E+00  0.000E+00  2.599E+05  4.090E+01  0.000E+00   0.0E+00
   32   53  2.935E+01  0.000E+00  0.000E+00  0.000E+00  1.849E+03  2.014E+01  0.000E+00   0.0E+00
   32   54  2.881E+01  3.961E+08  2.958E-05  1.403E-05  0.000E+00  0.000E+00  4.862E+00   1.1E+00
   32   55  2.879E+01  0.000E+00  0.000E+00  0.000E+00  0.000E+00  0.000E+00  1.232E+00   0.0E+00
   32   56  2.877E+01  2.846E+09  3.530E-04  1.672E-04  0.000E+00  0.000E+00  4.591E+02   1.1E+00
   32   58  2.871E+01  2.062E+09  3.569E-04  1.687E-04  0.000E+00  0.000E+00  2.022E+02   1.1E+00
   32   59  2.870E+01  3.606E+07  4.452E-06  2.103E-06  0.000E+00  0.000E+00  3.175E+02   1.1E+00
   32   60  2.868E+01  4.939E+09  8.528E-04  4.027E-04  0.000E+00  0.000E+00  8.235E+02   1.1E+00
   32   61  2.873E+01  0.000E+00  0.000E+00  0.000E+00  3.612E+03  0.000E+00  0.000E+00   0.0E+00
   32   62  2.866E+01  0.000E+00  0.000E+00  0.000E+00  0.000E+00  0.000E+00  1.065E+02   0.0E+00
   32   63  2.868E+01  0.000E+00  0.000E+00  0.000E+00  2.709E+03  3.406E+03  0.000E+00   0.0E+00
   32   64  2.720E+01  3.594E+06  2.391E-07  1.070E-07  0.000E+00  0.000E+00  3.866E-01   7.3E-01
   32   65  2.681E+01  0.000E+00  0.000E+00  0.000E+00  0.000E+00  0.000E+00  1.945E+02   0.0E+00
   32   66  2.672E+01  1.604E+08  1.030E-05  4.531E-06  0.000E+00  0.000E+00  5.295E+00   2.4E-03
   32   67  2.669E+01  8.993E+06  9.607E-07  4.222E-07  0.000E+00  0.000E+00  5.387E+00   2.0E-01
   32   68  2.517E+01  0.000E+00  0.000E+00  0.000E+00  1.608E+04  2.251E+00  0.000E+00   0.0E+00
   32   69  2.508E+01  0.000E+00  0.000E+00  0.000E+00  1.820E+05  2.646E+00  0.000E+00   0.0E+00
   32   70  2.504E+01  0.000E+00  0.000E+00  0.000E+00  1.185E+05  2.559E+01  0.000E+00   0.0E+00
   32   71  2.495E+01  0.000E+00  0.000E+00  0.000E+00  8.493E+04  8.919E+00  0.000E+00   0.0E+00
   32   72  2.431E+01  3.370E+08  4.179E-05  1.673E-05  0.000E+00  0.000E+00  2.419E+01   1.0E+00
   32   73  2.429E+01  2.433E+09  2.152E-04  8.604E-05  0.000E+00  0.000E+00  2.258E+01   1.0E+00
   32   74  2.427E+01  0.000E+00  0.000E+00  0.000E+00  0.000E+00  0.000E+00  2.405E+02   0.0E+00
   32   75  2.427E+01  2.452E+10  3.031E-03  1.211E-03  0.000E+00  0.000E+00  8.049E+03   1.0E+00
   32   76  1.956E+01  1.668E+12  5.739E-02  1.848E-02  0.000E+00  0.000E+00  2.784E+05   9.9E-01
   32   77  1.943E+01  0.000E+00  0.000E+00  0.000E+00  0.000E+00  0.000E+00  5.746E+05   0.0E+00
   32   78  1.882E+01  0.000E+00  0.000E+00  0.000E+00  2.412E+09  0.000E+00  0.000E+00   0.0E+00
   32   79  1.882E+01  0.000E+00  0.000E+00  0.000E+00  1.286E+09  8.359E+05  0.000E+00   0.0E+00
   32   80  1.864E+01  0.000E+00  0.000E+00  0.000E+00  4.597E+08  2.494E+04  0.000E+00   0.0E+00
   32   81  1.857E+01  0.000E+00  0.000E+00  0.000E+00  5.002E+08  3.630E+03  0.000E+00   0.0E+00
   32   82  1.852E+01  0.000E+00  0.000E+00  0.000E+00  1.776E+07  5.550E+04  0.000E+00   0.0E+00
   32   83  1.850E+01  0.000E+00  0.000E+00  0.000E+00  3.802E+08  2.089E+04  0.000E+00   0.0E+00
   32   84  1.821E+01  5.113E+09  1.525E-04  4.570E-05  0.000E+00  0.000E+00  5.741E+02   9.8E-01
   32   85  1.821E+01  6.185E+09  3.073E-04  9.210E-05  0.000E+00  0.000E+00  1.465E+02   1.3E+00
   32   86  1.811E+01  7.223E+10  4.973E-03  1.482E-03  0.000E+00  0.000E+00  3.042E+04   1.1E+00
   32   87  1.810E+01  4.883E+09  1.439E-04  4.288E-05  0.000E+00  0.000E+00  1.121E+03   1.3E+00
   32   88  1.808E+01  7.613E+08  3.732E-05  1.111E-05  0.000E+00  0.000E+00  4.788E+02   1.5E-01
   32   89  1.798E+01  0.000E+00  0.000E+00  0.000E+00  0.000E+00  0.000E+00  8.528E+00   0.0E+00
   32   90  1.786E+01  1.553E+11  4.454E-03  1.309E-03  0.000E+00  0.000E+00  9.302E-01   9.8E-01
   32   91  1.784E+01  1.352E+12  6.451E-02  1.894E-02  0.000E+00  0.000E+00  1.741E+05   9.8E-01
   32   92  1.780E+01  5.535E+12  3.682E-01  1.079E-01  0.000E+00  0.000E+00  2.142E+06   9.8E-01
   32   93  1.776E+01  0.000E+00  0.000E+00  0.000E+00  3.453E+06  0.000E+00  0.000E+00   0.0E+00
   32   94  1.775E+01  0.000E+00  0.000E+00  0.000E+00  2.090E+06  7.136E+01  0.000E+00   0.0E+00
   32   95  1.774E+01  0.000E+00  0.000E+00  0.000E+00  2.598E+04  1.309E+01  0.000E+00   0.0E+00
   32   96  1.773E+01  0.000E+00  0.000E+00  0.000E+00  3.392E+05  1.131E+02  0.000E+00   0.0E+00
   32   97  1.772E+01  0.000E+00  0.000E+00  0.000E+00  1.493E+05  0.000E+00  0.000E+00   0.0E+00
   32   98  1.771E+01  0.000E+00  0.000E+00  0.000E+00  3.534E+05  7.118E+01  0.000E+00   0.0E+00
   32   99  1.773E+01  4.152E+10  1.957E-03  5.710E-04  0.000E+00  0.000E+00  5.734E+05   9.8E-01
   32  100  1.769E+01  0.000E+00  0.000E+00  0.000E+00  1.027E+03  5.629E+01  0.000E+00   0.0E+00
   32  101  1.763E+01  0.000E+00  0.000E+00  0.000E+00  2.383E+05  3.454E+01  0.000E+00   0.0E+00
   32  102  1.755E+01  0.000E+00  0.000E+00  0.000E+00  9.854E+07  5.952E+01  0.000E+00   0.0E+00
   32  103  1.754E+01  0.000E+00  0.000E+00  0.000E+00  3.238E+08  2.372E+01  0.000E+00   0.0E+00
   32  104  1.753E+01  0.000E+00  0.000E+00  0.000E+00  0.000E+00  0.000E+00  1.926E+00   0.0E+00
   32  105  1.752E+01  4.331E+09  1.196E-04  3.451E-05  0.000E+00  0.000E+00  5.225E+00   9.4E-01
   32  107  1.752E+01  2.980E+10  1.371E-03  3.954E-04  0.000E+00  0.000E+00  8.768E+03   9.5E-01
   32  108  1.751E+01  8.814E+09  5.674E-04  1.636E-04  0.000E+00  0.000E+00  3.990E+03   9.5E-01
   32  109  1.752E+01  0.000E+00  0.000E+00  0.000E+00  9.521E+07  1.927E+02  0.000E+00   0.0E+00
   32  110  1.751E+01  5.240E+09  2.408E-04  6.939E-05  0.000E+00  0.000E+00  7.532E+03   9.5E-01
   32  111  1.751E+01  0.000E+00  0.000E+00  0.000E+00  9.426E+08  0.000E+00  0.000E+00   0.0E+00
   32  112  1.751E+01  8.155E+10  5.245E-03  1.511E-03  0.000E+00  0.000E+00  3.232E+04   9.5E-01
   32  113  1.750E+01  0.000E+00  0.000E+00  0.000E+00  0.000E+00  0.000E+00  1.162E+02   0.0E+00
   32  116  1.748E+01  0.000E+00  0.000E+00  0.000E+00  4.199E+06  0.000E+00  0.000E+00   0.0E+00
   32  118  1.739E+01  0.000E+00  0.000E+00  0.000E+00  1.206E+09  1.329E+03  0.000E+00   0.0E+00
   32  119  1.738E+01  0.000E+00  0.000E+00  0.000E+00  6.416E+09  0.000E+00  0.000E+00   0.0E+00
   32  120  1.737E+01  0.000E+00  0.000E+00  0.000E+00  3.934E+08  1.859E+02  0.000E+00   0.0E+00
   32  121  1.735E+01  0.000E+00  0.000E+00  0.000E+00  8.319E+08  2.043E+00  0.000E+00   0.0E+00
   32  122  1.658E+01  0.000E+00  0.000E+00  0.000E+00  1.925E+06  0.000E+00  0.000E+00   0.0E+00
   32  123  1.658E+01  0.000E+00  0.000E+00  0.000E+00  9.847E+05  1.321E+03  0.000E+00   0.0E+00
   32  124  1.632E+01  6.977E+06  1.671E-07  4.487E-08  0.000E+00  0.000E+00  4.501E+00   5.0E-01
   32  125  1.625E+01  0.000E+00  0.000E+00  0.000E+00  0.000E+00  0.000E+00  2.308E+00   0.0E+00
   32  126  1.623E+01  3.240E+08  7.676E-06  2.051E-06  0.000E+00  0.000E+00  3.613E+01   4.3E+00
   32  127  1.623E+01  3.558E+08  1.404E-05  3.750E-06  0.000E+00  0.000E+00  3.323E+02   1.5E+00
   32  128  1.594E+01  0.000E+00  0.000E+00  0.000E+00  2.185E+03  1.571E+00  0.000E+00   0.0E+00
   32  129  1.592E+01  0.000E+00  0.000E+00  0.000E+00  3.003E+05  1.945E-01  0.000E+00   0.0E+00
   32  130  1.591E+01  0.000E+00  0.000E+00  0.000E+00  6.208E+04  3.058E+01  0.000E+00   0.0E+00
   32  131  1.590E+01  0.000E+00  0.000E+00  0.000E+00  2.000E+05  1.281E+02  0.000E+00   0.0E+00
   32  132  1.576E+01  3.289E+07  1.716E-06  4.452E-07  0.000E+00  0.000E+00  7.641E-01   1.2E+00
   32  133  1.576E+01  2.503E+08  9.320E-06  2.418E-06  0.000E+00  0.000E+00  1.157E+00   1.2E+00
   32  134  1.576E+01  0.000E+00  0.000E+00  0.000E+00  0.000E+00  0.000E+00  2.114E+02   0.0E+00
   32  135  1.576E+01  2.496E+09  1.300E-04  3.372E-05  0.000E+00  0.000E+00  2.818E+03   1.2E+00
   32  136  1.574E+01  0.000E+00  0.000E+00  0.000E+00  3.104E+05  0.000E+00  0.000E+00   0.0E+00
   32  137  1.573E+01  0.000E+00  0.000E+00  0.000E+00  7.414E+06  9.349E+00  0.000E+00   0.0E+00
   32  139  1.573E+01  0.000E+00  0.000E+00  0.000E+00  5.208E+07  0.000E+00  0.000E+00   0.0E+00
   33   34  1.751E+02  1.764E+09  8.102E-03  1.401E-02  0.000E+00  0.000E+00  1.491E-02   1.1E+00
   33   35  1.724E+02  1.216E+09  9.023E-03  1.536E-02  0.000E+00  0.000E+00  1.145E+01   1.2E+00
   33   36  1.659E+02  0.000E+00  0.000E+00  0.000E+00  0.000E+00  0.000E+00  1.845E+01   0.0E+00
   33   37  1.485E+02  2.453E+10  1.352E-01  1.982E-01  0.000E+00  0.000E+00  9.046E+01   1.1E+00
   33   38  3.545E+01  0.000E+00  0.000E+00  0.000E+00  2.417E+03  2.980E+02  0.000E+00   0.0E+00
   33   39  3.533E+01  0.000E+00  0.000E+00  0.000E+00  3.198E+03  1.281E+02  0.000E+00   0.0E+00
   33   40  3.316E+01  4.335E+07  7.147E-06  2.341E-06  0.000E+00  0.000E+00  8.945E+00   1.5E-03
   33   41  3.309E+01  7.498E+06  2.052E-06  6.706E-07  0.000E+00  0.000E+00  2.424E-01   6.3E-01
   33   42  3.247E+01  0.000E+00  0.000E+00  0.000E+00  0.000E+00  0.000E+00  6.760E+00   0.0E+00
   33   43  3.245E+01  9.603E+05  1.516E-07  4.859E-08  0.000E+00  0.000E+00  1.190E+00   4.6E-03
   33   44  3.231E+01  6.533E+07  1.704E-05  5.438E-06  0.000E+00  0.000E+00  8.596E-02   5.2E-01
   33   45  3.165E+01  1.060E+09  5.308E-05  1.659E-05  0.000E+00  0.000E+00  0.000E+00   3.1E+00
   33   46  3.033E+01  0.000E+00  0.000E+00  0.000E+00  0.000E+00  8.408E+02  0.000E+00   0.0E+00
   33   47  3.025E+01  0.000E+00  0.000E+00  0.000E+00  1.708E+03  4.272E+01  0.000E+00   0.0E+00
   33   48  3.016E+01  0.000E+00  0.000E+00  0.000E+00  2.706E+02  0.000E+00  0.000E+00   0.0E+00
   33   49  3.012E+01  0.000E+00  0.000E+00  0.000E+00  2.273E+02  2.279E+01  0.000E+00   0.0E+00
   33   51  3.002E+01  0.000E+00  0.000E+00  0.000E+00  6.544E+04  9.545E+00  0.000E+00   0.0E+00
   33   52  2.992E+01  0.000E+00  0.000E+00  0.000E+00  1.024E+04  0.000E+00  0.000E+00   0.0E+00
   33   53  2.956E+01  0.000E+00  0.000E+00  0.000E+00  4.000E+04  5.985E+00  0.000E+00   0.0E+00
   33   54  2.901E+01  1.459E+09  1.840E-04  5.272E-05  0.000E+00  0.000E+00  7.443E-01   1.1E+00
   33   56  2.896E+01  4.343E+09  9.103E-04  2.604E-04  0.000E+00  0.000E+00  8.710E+02   1.1E+00
   33   58  2.891E+01  0.000E+00  0.000E+00  0.000E+00  0.000E+00  0.000E+00  9.343E+01   0.0E+00
   33   59  2.889E+01  6.600E+09  1.377E-03  3.928E-04  0.000E+00  0.000E+00  9.692E+02   1.1E+00
   33   60  2.888E+01  0.000E+00  0.000E+00  0.000E+00  0.000E+00  0.000E+00  5.764E+02   0.0E+00
   33   61  2.893E+01  0.000E+00  0.000E+00  0.000E+00  0.000E+00  7.190E+00  0.000E+00   0.0E+00
   33   63  2.888E+01  0.000E+00  0.000E+00  0.000E+00  2.827E+04  5.477E-02  0.000E+00   0.0E+00
   33   64  2.737E+01  1.141E+08  1.282E-05  3.465E-06  0.000E+00  0.000E+00  1.847E+01   8.5E-01
   33   65  2.698E+01  5.818E+09  2.117E-04  5.641E-05  0.000E+00  0.000E+00  0.000E+00   1.4E+00
   33   66  2.689E+01  3.898E+07  4.226E-06  1.122E-06  0.000E+00  0.000E+00  1.959E+01   1.5E+00
   33   67  2.686E+01  2.966E+08  5.348E-05  1.419E-05  0.000E+00  0.000E+00  1.822E+00   4.0E-01
   33   68  2.532E+01  0.000E+00  0.000E+00  0.000E+00  1.870E+05  1.618E+00  0.000E+00   0.0E+00
   33   69  2.523E+01  0.000E+00  0.000E+00  0.000E+00  7.208E+04  2.209E+00  0.000E+00   0.0E+00
   33   70  2.519E+01  0.000E+00  0.000E+00  0.000E+00  7.869E+05  0.000E+00  0.000E+00   0.0E+00
   33   71  2.510E+01  0.000E+00  0.000E+00  0.000E+00  7.786E+05  1.989E+02  0.000E+00   0.0E+00
   33   72  2.445E+01  0.000E+00  0.000E+00  0.000E+00  0.000E+00  0.000E+00  2.132E+01   0.0E+00
   33   73  2.443E+01  3.218E+09  4.799E-04  1.158E-04  0.000E+00  0.000E+00  7.137E+01   1.1E+00
   33   75  2.441E+01  0.000E+00  0.000E+00  0.000E+00  0.000E+00  0.000E+00  3.812E+02   0.0E+00
   33   76  1.965E+01  2.531E+11  1.465E-02  2.843E-03  0.000E+00  0.000E+00  2.823E+05   9.9E-01
   33   77  1.952E+01  2.189E+12  4.167E-02  8.032E-03  0.000E+00  0.000E+00  0.000E+00   9.8E-01
   33   78  1.891E+01  0.000E+00  0.000E+00  0.000E+00  0.000E+00  1.060E+06  0.000E+00   0.0E+00
   33   79  1.890E+01  0.000E+00  0.000E+00  0.000E+00  1.010E+09  1.788E+05  0.000E+00   0.0E+00
   33   80  1.872E+01  0.000E+00  0.000E+00  0.000E+00  1.472E+08  7.294E+00  0.000E+00   0.0E+00
   33   81  1.865E+01  0.000E+00  0.000E+00  0.000E+00  5.522E+08  4.746E+04  0.000E+00   0.0E+00
   33   82  1.860E+01  0.000E+00  0.000E+00  0.000E+00  3.913E+08  9.175E+02  0.000E+00   0.0E+00
   33   83  1.858E+01  0.000E+00  0.000E+00  0.000E+00  1.219E+08  1.831E+02  0.000E+00   0.0E+00
   33   84  1.829E+01  1.822E+09  9.133E-05  1.649E-05  0.000E+00  0.000E+00  6.583E+02   1.4E+00
   33   85  1.828E+01  2.795E+08  2.335E-05  4.217E-06  0.000E+00  0.000E+00  2.358E+02   1.0E+00
   33   86  1.819E+01  0.000E+00  0.000E+00  0.000E+00  0.000E+00  0.000E+00  6.515E+03   0.0E+00
   33   87  1.818E+01  3.058E+08  1.515E-05  2.720E-06  0.000E+00  0.000E+00  4.954E+02   7.8E-01
   33   88  1.816E+01  1.384E+10  1.141E-03  2.046E-04  0.000E+00  0.000E+00  2.955E+03   9.2E-01
   33   89  1.806E+01  7.141E+08  1.164E-05  2.075E-06  0.000E+00  0.000E+00  0.000E+00   1.1E-02
   33   90  1.793E+01  5.853E+11  2.822E-02  4.997E-03  0.000E+00  0.000E+00  5.298E+02   9.8E-01
   33   91  1.792E+01  4.008E+11  3.214E-02  5.686E-03  0.000E+00  0.000E+00  3.589E+05   9.8E-01
   33   92  1.788E+01  0.000E+00  0.000E+00  0.000E+00  0.000E+00  0.000E+00  4.310E+05   0.0E+00
   33   93  1.784E+01  0.000E+00  0.000E+00  0.000E+00  0.000E+00  9.864E+01  0.000E+00   0.0E+00
   33   94  1.782E+01  0.000E+00  0.000E+00  0.000E+00  1.240E+05  7.071E+01  0.000E+00   0.0E+00
   33   95  1.781E+01  0.000E+00  0.000E+00  0.000E+00  2.770E+06  0.000E+00  0.000E+00   0.0E+00
   33   96  1.780E+01  0.000E+00  0.000E+00  0.000E+00  1.298E+05  1.304E+01  0.000E+00   0.0E+00
   33   98  1.778E+01  0.000E+00  0.000E+00  0.000E+00  6.614E+04  1.820E+01  0.000E+00   0.0E+00
   33   99  1.780E+01  4.770E+12  3.777E-01  6.642E-02  0.000E+00  0.000E+00  1.264E+06   9.9E-01
   33  100  1.777E+01  0.000E+00  0.000E+00  0.000E+00  3.756E+06  0.000E+00  0.000E+00   0.0E+00
   33  101  1.770E+01  0.000E+00  0.000E+00  0.000E+00  7.042E+05  2.487E+01  0.000E+00   0.0E+00
   33  102  1.762E+01  0.000E+00  0.000E+00  0.000E+00  1.706E+08  3.014E+02  0.000E+00   0.0E+00
   33  103  1.761E+01  0.000E+00  0.000E+00  0.000E+00  7.823E+08  0.000E+00  0.000E+00   0.0E+00
   33  105  1.760E+01  1.634E+10  7.586E-04  1.318E-04  0.000E+00  0.000E+00  3.320E+01   9.5E-01
   33  107  1.759E+01  3.665E+10  2.833E-03  4.923E-04  0.000E+00  0.000E+00  1.948E+04   9.6E-01
   33  108  1.759E+01  0.000E+00  0.000E+00  0.000E+00  0.000E+00  0.000E+00  7.873E+02   0.0E+00
   33  109  1.759E+01  0.000E+00  0.000E+00  0.000E+00  2.439E+08  0.000E+00  0.000E+00   0.0E+00
   33  110  1.758E+01  5.177E+10  3.998E-03  6.942E-04  0.000E+00  0.000E+00  1.560E+04   9.4E-01
   33  112  1.758E+01  0.000E+00  0.000E+00  0.000E+00  0.000E+00  0.000E+00  4.898E+03   0.0E+00
   33  118  1.746E+01  0.000E+00  0.000E+00  0.000E+00  4.075E+08  0.000E+00  0.000E+00   0.0E+00
   33  120  1.744E+01  0.000E+00  0.000E+00  0.000E+00  6.802E+08  1.167E+03  0.000E+00   0.0E+00
   33  121  1.742E+01  0.000E+00  0.000E+00  0.000E+00  5.287E+09  0.000E+00  0.000E+00   0.0E+00
   33  122  1.665E+01  0.000E+00  0.000E+00  0.000E+00  0.000E+00  1.106E+03  0.000E+00   0.0E+00
   33  123  1.664E+01  0.000E+00  0.000E+00  0.000E+00  1.179E+05  1.468E+02  0.000E+00   0.0E+00
   33  124  1.638E+01  9.645E+08  3.879E-05  6.275E-06  0.000E+00  0.000E+00  1.779E-02   9.0E-01
   33  125  1.632E+01  1.009E+09  1.342E-05  2.163E-06  0.000E+00  0.000E+00  0.000E+00   1.6E+00
   33  126  1.629E+01  9.489E+07  3.776E-06  6.076E-07  0.000E+00  0.000E+00  4.228E+02   1.1E+00
   33  127  1.629E+01  4.383E+09  2.906E-04  4.674E-05  0.000E+00  0.000E+00  1.357E+03   8.0E-01
   33  128  1.600E+01  0.000E+00  0.000E+00  0.000E+00  5.407E+04  1.666E+00  0.000E+00   0.0E+00
   33  129  1.598E+01  0.000E+00  0.000E+00  0.000E+00  5.777E+04  3.485E+01  0.000E+00   0.0E+00
   33  130  1.597E+01  0.000E+00  0.000E+00  0.000E+00  9.314E+05  0.000E+00  0.000E+00   0.0E+00
   33  131  1.596E+01  0.000E+00  0.000E+00  0.000E+00  7.673E+05  8.521E+01  0.000E+00   0.0E+00
   33  132  1.582E+01  0.000E+00  0.000E+00  0.000E+00  0.000E+00  0.000E+00  3.383E+01   0.0E+00
   33  133  1.582E+01  1.160E+09  7.253E-05  1.133E-05  0.000E+00  0.000E+00  1.523E+02   1.1E+00
   33  135  1.581E+01  0.000E+00  0.000E+00  0.000E+00  0.000E+00  0.000E+00  1.278E+01   0.0E+00
   33  137  1.579E+01  0.000E+00  0.000E+00  0.000E+00  9.022E+06  0.000E+00  0.000E+00   0.0E+00
   34   35  1.117E+04  0.000E+00  0.000E+00  0.000E+00  1.017E-05  1.664E+01  0.000E+00   0.0E+00
   34   36  3.161E+03  0.000E+00  0.000E+00  0.000E+00  4.769E-04  0.000E+00  0.000E+00   0.0E+00
   34   37  9.793E+02  0.000E+00  0.000E+00  0.000E+00  7.177E-02  9.158E+02  0.000E+00   0.0E+00
   34   38  4.445E+01  1.160E+06  5.730E-07  2.516E-07  0.000E+00  0.000E+00  1.342E+00   6.3E-01
   34   39  4.426E+01  1.232E+07  3.618E-06  1.582E-06  0.000E+00  0.000E+00  9.297E-01   6.4E-01
   34   40  4.092E+01  0.000E+00  0.000E+00  0.000E+00  1.477E+05  6.543E+01  0.000E+00   0.0E+00
   34   41  4.081E+01  0.000E+00  0.000E+00  0.000E+00  2.288E+03  6.528E+02  0.000E+00   0.0E+00
   34   42  3.987E+01  0.000E+00  0.000E+00  0.000E+00  1.007E+02  0.000E+00  0.000E+00   0.0E+00
   34   43  3.984E+01  0.000E+00  0.000E+00  0.000E+00  1.362E+03  1.470E+02  0.000E+00   0.0E+00
   34   44  3.962E+01  0.000E+00  0.000E+00  0.000E+00  2.622E+04  5.352E+01  0.000E+00   0.0E+00
   34   45  3.864E+01  0.000E+00  0.000E+00  0.000E+00  0.000E+00  7.235E+01  0.000E+00   0.0E+00
   34   46  3.669E+01  2.106E+09  1.417E-04  5.133E-05  0.000E+00  0.000E+00  0.000E+00   4.4E-04
   34   47  3.657E+01  1.229E+09  2.465E-04  8.905E-05  0.000E+00  0.000E+00  1.132E+01   7.5E-02
   34   48  3.644E+01  0.000E+00  0.000E+00  0.000E+00  0.000E+00  0.000E+00  3.201E-01   0.0E+00
   34   49  3.638E+01  6.985E+06  2.309E-06  8.296E-07  0.000E+00  0.000E+00  4.388E+00   1.5E+00
   34   51  3.623E+01  2.247E+08  7.369E-05  2.637E-05  0.000E+00  0.000E+00  6.468E+00   7.0E-01
   34   52  3.609E+01  0.000E+00  0.000E+00  0.000E+00  0.000E+00  0.000E+00  9.873E+00   0.0E+00
   34   53  3.557E+01  2.006E+08  3.804E-05  1.336E-05  0.000E+00  0.000E+00  8.452E+00   7.8E-01
   34   54  3.477E+01  0.000E+00  0.000E+00  0.000E+00  2.290E+03  1.589E+01  0.000E+00   0.0E+00
   34   56  3.470E+01  0.000E+00  0.000E+00  0.000E+00  4.906E+04  2.674E+01  0.000E+00   0.0E+00
   34   58  3.463E+01  0.000E+00  0.000E+00  0.000E+00  5.397E+01  0.000E+00  0.000E+00   0.0E+00
   34   59  3.460E+01  0.000E+00  0.000E+00  0.000E+00  7.229E+04  7.834E+00  0.000E+00   0.0E+00
   34   60  3.458E+01  0.000E+00  0.000E+00  0.000E+00  3.477E+04  0.000E+00  0.000E+00   0.0E+00
   34   61  3.465E+01  2.512E+08  1.508E-05  5.159E-06  0.000E+00  0.000E+00  0.000E+00   5.9E-01
   34   63  3.458E+01  2.157E+07  3.867E-06  1.321E-06  0.000E+00  0.000E+00  1.419E+01   4.6E-01
   34   64  3.244E+01  0.000E+00  0.000E+00  0.000E+00  9.483E+03  7.005E+01  0.000E+00   0.0E+00
   34   65  3.190E+01  0.000E+00  0.000E+00  0.000E+00  0.000E+00  1.185E+02  0.000E+00   0.0E+00
   34   66  3.177E+01  0.000E+00  0.000E+00  0.000E+00  9.962E+04  9.961E+01  0.000E+00   0.0E+00
   34   67  3.173E+01  0.000E+00  0.000E+00  0.000E+00  2.497E+04  3.145E+01  0.000E+00   0.0E+00
   34   68  2.960E+01  2.068E+09  4.529E-04  1.324E-04  0.000E+00  0.000E+00  5.328E+00   8.1E-01
   34   69  2.947E+01  2.584E+08  5.607E-05  1.632E-05  0.000E+00  0.000E+00  5.806E-01   9.1E-01
   34   70  2.943E+01  0.000E+00  0.000E+00  0.000E+00  0.000E+00  0.000E+00  8.761E+01   0.0E+00
   34   71  2.930E+01  3.151E+08  4.055E-05  1.173E-05  0.000E+00  0.000E+00  6.171E+00   1.0E+00
   34   72  2.842E+01  0.000E+00  0.000E+00  0.000E+00  6.404E+05  0.000E+00  0.000E+00   0.0E+00
   34   73  2.839E+01  0.000E+00  0.000E+00  0.000E+00  1.938E+05  5.545E+03  0.000E+00   0.0E+00
   34   75  2.836E+01  0.000E+00  0.000E+00  0.000E+00  9.153E+04  0.000E+00  0.000E+00   0.0E+00
   34   76  2.213E+01  0.000E+00  0.000E+00  0.000E+00  2.033E+08  4.673E+00  0.000E+00   0.0E+00
   34   77  2.197E+01  0.000E+00  0.000E+00  0.000E+00  0.000E+00  1.767E+00  0.000E+00   0.0E+00
   34   78  2.120E+01  6.528E+11  1.466E-02  3.068E-03  0.000E+00  0.000E+00  0.000E+00   1.0E+00
   34   79  2.119E+01  1.142E+11  7.687E-03  1.609E-03  0.000E+00  0.000E+00  3.174E+03   1.0E+00
   34   80  2.096E+01  3.093E+09  3.396E-04  7.031E-05  0.000E+00  0.000E+00  3.507E+00   1.1E+00
   34   81  2.088E+01  4.050E+10  2.646E-03  5.455E-04  0.000E+00  0.000E+00  1.314E+00   1.0E+00
   34   82  2.081E+01  9.841E+08  6.390E-05  1.313E-05  0.000E+00  0.000E+00  1.090E+02   1.1E+00
   34   83  2.079E+01  2.658E+09  2.871E-04  5.895E-05  0.000E+00  0.000E+00  2.930E-01   1.0E+00
   34   84  2.042E+01  0.000E+00  0.000E+00  0.000E+00  4.349E+06  1.463E-01  0.000E+00   0.0E+00
   34   85  2.042E+01  0.000E+00  0.000E+00  0.000E+00  3.846E+06  1.125E+02  0.000E+00   0.0E+00
   34   86  2.030E+01  0.000E+00  0.000E+00  0.000E+00  5.222E+05  0.000E+00  0.000E+00   0.0E+00
   34   87  2.028E+01  0.000E+00  0.000E+00  0.000E+00  6.966E+05  1.633E+00  0.000E+00   0.0E+00
   34   88  2.026E+01  0.000E+00  0.000E+00  0.000E+00  3.404E+05  6.724E+01  0.000E+00   0.0E+00
   34   89  2.013E+01  0.000E+00  0.000E+00  0.000E+00  0.000E+00  1.217E+01  0.000E+00   0.0E+00
   34   90  1.998E+01  0.000E+00  0.000E+00  0.000E+00  3.068E+08  1.228E+04  0.000E+00   0.0E+00
   34   91  1.996E+01  0.000E+00  0.000E+00  0.000E+00  2.974E+08  6.154E+03  0.000E+00   0.0E+00
   34   92  1.991E+01  0.000E+00  0.000E+00  0.000E+00  2.528E+07  0.000E+00  0.000E+00   0.0E+00
   34   93  1.986E+01  4.784E+09  9.431E-05  1.850E-05  0.000E+00  0.000E+00  0.000E+00   5.5E-01
   34   94  1.984E+01  2.436E+09  1.439E-04  2.819E-05  0.000E+00  0.000E+00  1.849E+02   1.7E-01
   34   95  1.983E+01  0.000E+00  0.000E+00  0.000E+00  0.000E+00  0.000E+00  5.601E+02   0.0E+00
   34   96  1.982E+01  5.599E+08  5.494E-05  1.075E-05  0.000E+00  0.000E+00  1.362E+02   5.0E-02
   34   98  1.980E+01  2.534E+07  2.481E-06  4.850E-07  0.000E+00  0.000E+00  7.118E+01   4.5E+00
   34   99  1.982E+01  0.000E+00  0.000E+00  0.000E+00  9.052E+06  5.779E+03  0.000E+00   0.0E+00
   34  100  1.978E+01  0.000E+00  0.000E+00  0.000E+00  0.000E+00  0.000E+00  5.090E+02   0.0E+00
   34  101  1.969E+01  1.626E+08  9.455E-06  1.839E-06  0.000E+00  0.000E+00  6.070E+01   5.4E-01
   34  102  1.960E+01  2.431E+12  2.333E-01  4.515E-02  0.000E+00  0.000E+00  1.334E+05   1.0E+00
   34  103  1.958E+01  0.000E+00  0.000E+00  0.000E+00  0.000E+00  0.000E+00  1.229E+05   0.0E+00
   34  105  1.956E+01  0.000E+00  0.000E+00  0.000E+00  1.918E+07  5.820E+02  0.000E+00   0.0E+00
   34  107  1.956E+01  0.000E+00  0.000E+00  0.000E+00  1.588E+07  4.628E+02  0.000E+00   0.0E+00
   34  108  1.955E+01  0.000E+00  0.000E+00  0.000E+00  5.078E+05  0.000E+00  0.000E+00   0.0E+00
   34  109  1.955E+01  0.000E+00  0.000E+00  0.000E+00  0.000E+00  0.000E+00  5.756E+04   0.0E+00
   34  110  1.954E+01  0.000E+00  0.000E+00  0.000E+00  1.910E+06  1.089E+02  0.000E+00   0.0E+00
   34  112  1.954E+01  0.000E+00  0.000E+00  0.000E+00  7.683E+05  0.000E+00  0.000E+00   0.0E+00
   34  118  1.940E+01  0.000E+00  0.000E+00  0.000E+00  0.000E+00  0.000E+00  8.499E+04   0.0E+00
   34  120  1.937E+01  7.607E+12  7.130E-01  1.364E-01  0.000E+00  0.000E+00  4.103E+05   9.9E-01
   34  121  1.935E+01  0.000E+00  0.000E+00  0.000E+00  0.000E+00  0.000E+00  7.032E+05   0.0E+00
   34  122  1.840E+01  1.264E+09  2.138E-05  3.884E-06  0.000E+00  0.000E+00  0.000E+00   6.3E-01
   34  123  1.839E+01  2.021E+08  1.024E-05  1.861E-06  0.000E+00  0.000E+00  1.338E+01   6.0E-01
   34  124  1.807E+01  0.000E+00  0.000E+00  0.000E+00  1.626E+05  1.096E+00  0.000E+00   0.0E+00
   34  125  1.800E+01  0.000E+00  0.000E+00  0.000E+00  0.000E+00  7.608E+00  0.000E+00   0.0E+00
   34  126  1.796E+01  0.000E+00  0.000E+00  0.000E+00  5.628E+05  1.527E+01  0.000E+00   0.0E+00
   34  127  1.796E+01  0.000E+00  0.000E+00  0.000E+00  2.157E+05  2.449E+00  0.000E+00   0.0E+00
   34  128  1.761E+01  9.814E+08  7.604E-05  1.322E-05  0.000E+00  0.000E+00  1.226E+01   6.6E-01
   34  129  1.758E+01  1.360E+08  1.051E-05  1.825E-06  0.000E+00  0.000E+00  1.410E+00   7.5E-01
   34  130  1.758E+01  0.000E+00  0.000E+00  0.000E+00  0.000E+00  0.000E+00  2.394E+02   0.0E+00
   34  131  1.756E+01  2.349E+08  1.086E-05  1.883E-06  0.000E+00  0.000E+00  1.160E+01   8.3E-01
   34  132  1.740E+01  0.000E+00  0.000E+00  0.000E+00  4.101E+04  0.000E+00  0.000E+00   0.0E+00
   34  133  1.739E+01  0.000E+00  0.000E+00  0.000E+00  8.274E+04  1.385E+03  0.000E+00   0.0E+00
   34  135  1.738E+01  0.000E+00  0.000E+00  0.000E+00  2.537E+04  0.000E+00  0.000E+00   0.0E+00
   34  137  1.736E+01  0.000E+00  0.000E+00  0.000E+00  0.000E+00  0.000E+00  3.991E+02   0.0E+00
   35   36  4.408E+03  0.000E+00  0.000E+00  0.000E+00  8.729E-04  2.008E+02  0.000E+00   0.0E+00
   35   37  1.073E+03  0.000E+00  0.000E+00  0.000E+00  3.088E-02  1.338E+02  0.000E+00   0.0E+00
   35   38  4.463E+01  2.162E+07  6.457E-06  4.744E-06  0.000E+00  0.000E+00  2.256E+00   6.4E-01
   35   39  4.444E+01  9.489E+07  1.686E-05  1.233E-05  0.000E+00  0.000E+00  1.708E+00   6.7E-01
   35   40  4.107E+01  0.000E+00  0.000E+00  0.000E+00  8.392E+04  3.005E+00  0.000E+00   0.0E+00
   35   41  4.096E+01  0.000E+00  0.000E+00  0.000E+00  1.346E+04  5.231E+00  0.000E+00   0.0E+00
   35   42  4.001E+01  0.000E+00  0.000E+00  0.000E+00  1.168E+03  2.127E+02  0.000E+00   0.0E+00
   35   43  3.998E+01  0.000E+00  0.000E+00  0.000E+00  1.718E+02  7.270E+01  0.000E+00   0.0E+00
   35   44  3.976E+01  0.000E+00  0.000E+00  0.000E+00  1.027E+05  1.484E+02  0.000E+00   0.0E+00
   35   45  3.877E+01  0.000E+00  0.000E+00  0.000E+00  2.398E+05  0.000E+00  0.000E+00   0.0E+00
   35   46  3.681E+01  0.000E+00  0.000E+00  0.000E+00  0.000E+00  0.000E+00  8.441E+00   0.0E+00
   35   47  3.669E+01  6.433E+08  7.791E-05  4.706E-05  0.000E+00  0.000E+00  2.803E+01   4.9E-02
   35   48  3.656E+01  8.377E+08  2.350E-04  1.415E-04  0.000E+00  0.000E+00  1.385E-02   8.9E-01
   35   49  3.649E+01  1.516E+09  3.026E-04  1.818E-04  0.000E+00  0.000E+00  6.264E+01   2.7E-01
   35   50  3.647E+01  0.000E+00  0.000E+00  0.000E+00  0.000E+00  0.000E+00  3.362E+01   0.0E+00
   35   51  3.635E+01  3.370E+07  6.675E-06  3.994E-06  0.000E+00  0.000E+00  1.751E+01   4.1E+00
   35   52  3.620E+01  9.304E+07  2.559E-05  1.525E-05  0.000E+00  0.000E+00  3.608E-01   3.0E-01
   35   53  3.568E+01  1.910E+08  2.187E-05  1.285E-05  0.000E+00  0.000E+00  5.471E+01   4.7E-03
   35   54  3.488E+01  0.000E+00  0.000E+00  0.000E+00  2.803E+03  1.256E+03  0.000E+00   0.0E+00
   35   55  3.484E+01  0.000E+00  0.000E+00  0.000E+00  1.493E+05  0.000E+00  0.000E+00   0.0E+00
   35   56  3.481E+01  0.000E+00  0.000E+00  0.000E+00  1.518E+04  5.622E+02  0.000E+00   0.0E+00
   35   58  3.474E+01  0.000E+00  0.000E+00  0.000E+00  2.206E+05  4.723E+02  0.000E+00   0.0E+00
   35   59  3.471E+01  0.000E+00  0.000E+00  0.000E+00  4.703E+04  5.435E+02  0.000E+00   0.0E+00
   35   60  3.469E+01  0.000E+00  0.000E+00  0.000E+00  3.655E+03  8.874E+01  0.000E+00   0.0E+00
   35   61  3.476E+01  0.000E+00  0.000E+00  0.000E+00  0.000E+00  0.000E+00  4.456E+01   0.0E+00
   35   62  3.465E+01  0.000E+00  0.000E+00  0.000E+00  1.098E+04  0.000E+00  0.000E+00   0.0E+00
   35   63  3.469E+01  1.064E+08  1.151E-05  6.574E-06  0.000E+00  0.000E+00  1.209E+01   3.8E-01
   35   64  3.254E+01  0.000E+00  0.000E+00  0.000E+00  8.172E+03  1.726E+03  0.000E+00   0.0E+00
   35   65  3.199E+01  0.000E+00  0.000E+00  0.000E+00  4.254E+05  0.000E+00  0.000E+00   0.0E+00
   35   66  3.186E+01  0.000E+00  0.000E+00  0.000E+00  9.169E+03  3.183E+01  0.000E+00   0.0E+00
   35   67  3.182E+01  0.000E+00  0.000E+00  0.000E+00  6.512E+04  1.376E+01  0.000E+00   0.0E+00
   35   68  2.968E+01  2.356E+07  3.113E-06  1.521E-06  0.000E+00  0.000E+00  4.254E+00   3.4E+00
   35   69  2.955E+01  1.820E+07  2.383E-06  1.159E-06  0.000E+00  0.000E+00  4.540E+01   5.1E+00
   35   70  2.951E+01  1.166E+09  2.130E-04  1.035E-04  0.000E+00  0.000E+00  1.166E+02   8.2E-01
   35   71  2.938E+01  1.490E+09  1.157E-04  5.594E-05  0.000E+00  0.000E+00  1.336E+01   1.9E-01
   35   72  2.849E+01  0.000E+00  0.000E+00  0.000E+00  1.544E+04  5.498E+02  0.000E+00   0.0E+00
   35   73  2.847E+01  0.000E+00  0.000E+00  0.000E+00  1.530E+05  3.782E+03  0.000E+00   0.0E+00
   35   74  2.844E+01  0.000E+00  0.000E+00  0.000E+00  3.761E+05  0.000E+00  0.000E+00   0.0E+00
   35   75  2.843E+01  0.000E+00  0.000E+00  0.000E+00  5.034E+04  1.747E+03  0.000E+00   0.0E+00
   35   76  2.218E+01  0.000E+00  0.000E+00  0.000E+00  3.257E+08  1.170E+01  0.000E+00   0.0E+00
   35   77  2.201E+01  0.000E+00  0.000E+00  0.000E+00  3.580E+07  0.000E+00  0.000E+00   0.0E+00
   35   78  2.124E+01  0.000E+00  0.000E+00  0.000E+00  0.000E+00  0.000E+00  2.352E+03   0.0E+00
   35   79  2.123E+01  4.311E+11  1.748E-02  6.110E-03  0.000E+00  0.000E+00  1.330E+04   1.0E+00
   35   80  2.100E+01  4.439E+10  2.935E-03  1.015E-03  0.000E+00  0.000E+00  4.201E+03   1.1E+00
   35   81  2.092E+01  5.938E+10  2.336E-03  8.044E-04  0.000E+00  0.000E+00  2.288E+04   1.1E+00
   35   82  2.085E+01  4.559E+08  1.783E-05  6.119E-06  0.000E+00  0.000E+00  3.371E+03   4.4E-01
   35   83  2.083E+01  3.870E+10  2.517E-03  8.631E-04  0.000E+00  0.000E+00  3.226E+03   1.0E+00
   35   84  2.046E+01  0.000E+00  0.000E+00  0.000E+00  3.860E+04  7.003E-01  0.000E+00   0.0E+00
   35   85  2.045E+01  0.000E+00  0.000E+00  0.000E+00  5.102E+06  2.259E+02  0.000E+00   0.0E+00
   35   86  2.033E+01  0.000E+00  0.000E+00  0.000E+00  5.022E+06  5.906E+01  0.000E+00   0.0E+00
   35   87  2.032E+01  0.000E+00  0.000E+00  0.000E+00  1.905E+06  7.883E+01  0.000E+00   0.0E+00
   35   88  2.030E+01  0.000E+00  0.000E+00  0.000E+00  6.793E+05  1.020E+02  0.000E+00   0.0E+00
   35   89  2.017E+01  0.000E+00  0.000E+00  0.000E+00  1.112E+06  0.000E+00  0.000E+00   0.0E+00
   35   90  2.001E+01  0.000E+00  0.000E+00  0.000E+00  4.957E+08  2.817E+03  0.000E+00   0.0E+00
   35   91  1.999E+01  0.000E+00  0.000E+00  0.000E+00  2.357E+08  2.185E+04  0.000E+00   0.0E+00
   35   92  1.995E+01  0.000E+00  0.000E+00  0.000E+00  2.433E+08  1.405E+04  0.000E+00   0.0E+00
   35   93  1.990E+01  0.000E+00  0.000E+00  0.000E+00  0.000E+00  0.000E+00  6.423E+00   0.0E+00
   35   94  1.988E+01  1.688E+09  5.999E-05  1.963E-05  0.000E+00  0.000E+00  2.777E+02   9.3E-01
   35   95  1.986E+01  7.581E+08  6.279E-05  2.053E-05  0.000E+00  0.000E+00  9.564E+00   8.3E-01
   35   96  1.985E+01  1.727E+09  1.020E-04  3.335E-05  0.000E+00  0.000E+00  4.400E+02   5.0E-02
   35   97  1.985E+01  0.000E+00  0.000E+00  0.000E+00  0.000E+00  0.000E+00  3.674E+00   0.0E+00
   35   98  1.983E+01  1.329E+08  7.838E-06  2.559E-06  0.000E+00  0.000E+00  2.655E+02   4.1E-01
   35   99  1.985E+01  0.000E+00  0.000E+00  0.000E+00  9.670E+06  1.360E+01  0.000E+00   0.0E+00
   35  100  1.981E+01  1.812E+06  1.493E-07  4.868E-08  0.000E+00  0.000E+00  6.972E+02   6.0E+01
   35  101  1.973E+01  3.978E+08  1.393E-05  4.523E-06  0.000E+00  0.000E+00  5.302E+02   3.1E-01
   35  102  1.963E+01  4.331E+11  2.502E-02  8.086E-03  0.000E+00  0.000E+00  4.412E+04   1.0E+00
   35  103  1.962E+01  1.273E+12  1.028E-01  3.321E-02  0.000E+00  0.000E+00  5.740E+05   1.0E+00
   35  104  1.960E+01  0.000E+00  0.000E+00  0.000E+00  2.606E+05  0.000E+00  0.000E+00   0.0E+00
   35  105  1.960E+01  0.000E+00  0.000E+00  0.000E+00  3.091E+07  1.208E+02  0.000E+00   0.0E+00
   35  107  1.959E+01  0.000E+00  0.000E+00  0.000E+00  8.047E+06  2.573E+01  0.000E+00   0.0E+00
   35  108  1.958E+01  0.000E+00  0.000E+00  0.000E+00  1.008E+06  7.634E+01  0.000E+00   0.0E+00
   35  109  1.959E+01  7.928E+11  6.384E-02  2.058E-02  0.000E+00  0.000E+00  9.754E+03   1.0E+00
   35  110  1.958E+01  0.000E+00  0.000E+00  0.000E+00  5.262E+05  2.748E+02  0.000E+00   0.0E+00
   35  111  1.958E+01  0.000E+00  0.000E+00  0.000E+00  0.000E+00  0.000E+00  3.930E+04   0.0E+00
   35  112  1.958E+01  0.000E+00  0.000E+00  0.000E+00  8.368E+06  3.272E+02  0.000E+00   0.0E+00
   35  113  1.957E+01  0.000E+00  0.000E+00  0.000E+00  8.259E+04  0.000E+00  0.000E+00   0.0E+00
   35  116  1.955E+01  0.000E+00  0.000E+00  0.000E+00  0.000E+00  0.000E+00  5.706E+02   0.0E+00
   35  118  1.943E+01  6.742E+12  5.343E-01  1.709E-01  0.000E+00  0.000E+00  4.407E+05   9.9E-01
   35  119  1.942E+01  0.000E+00  0.000E+00  0.000E+00  0.000E+00  0.000E+00  2.549E+05   0.0E+00
   35  120  1.940E+01  1.353E+12  7.638E-02  2.440E-02  0.000E+00  0.000E+00  1.332E+05   9.9E-01
   35  121  1.938E+01  1.850E+12  1.458E-01  4.651E-02  0.000E+00  0.000E+00  1.718E+06   9.9E-01
   35  122  1.843E+01  0.000E+00  0.000E+00  0.000E+00  0.000E+00  0.000E+00  1.094E+02   0.0E+00
   35  123  1.842E+01  4.719E+08  1.440E-05  4.367E-06  0.000E+00  0.000E+00  1.016E+02   5.8E-01
   35  124  1.810E+01  0.000E+00  0.000E+00  0.000E+00  1.688E+05  4.066E+02  0.000E+00   0.0E+00
   35  125  1.802E+01  0.000E+00  0.000E+00  0.000E+00  7.994E+06  0.000E+00  0.000E+00   0.0E+00
   35  126  1.799E+01  0.000E+00  0.000E+00  0.000E+00  3.344E+05  2.032E+01  0.000E+00   0.0E+00
   35  127  1.799E+01  0.000E+00  0.000E+00  0.000E+00  6.208E+05  2.280E+01  0.000E+00   0.0E+00
   35  128  1.764E+01  2.210E+07  1.031E-06  2.993E-07  0.000E+00  0.000E+00  3.908E+01   4.1E+00
   35  129  1.761E+01  1.987E+06  9.239E-08  2.679E-08  0.000E+00  0.000E+00  6.654E+01   6.5E+01
   35  130  1.760E+01  4.684E+08  3.047E-05  8.830E-06  0.000E+00  0.000E+00  2.715E+02   4.9E-01
   35  131  1.759E+01  3.079E+09  8.565E-05  2.479E-05  0.000E+00  0.000E+00  1.493E+02   1.4E-02
   35  132  1.742E+01  0.000E+00  0.000E+00  0.000E+00  2.355E+05  1.443E+02  0.000E+00   0.0E+00
   35  133  1.742E+01  0.000E+00  0.000E+00  0.000E+00  1.170E+06  1.148E+03  0.000E+00   0.0E+00
   35  134  1.741E+01  0.000E+00  0.000E+00  0.000E+00  2.816E+03  0.000E+00  0.000E+00   0.0E+00
   35  135  1.741E+01  0.000E+00  0.000E+00  0.000E+00  4.744E+05  4.110E+02  0.000E+00   0.0E+00
   35  136  1.739E+01  0.000E+00  0.000E+00  0.000E+00  0.000E+00  0.000E+00  5.370E+01   0.0E+00
   35  137  1.739E+01  4.602E+09  2.920E-04  8.355E-05  0.000E+00  0.000E+00  5.328E+01   8.7E-01
   35  139  1.738E+01  0.000E+00  0.000E+00  0.000E+00  0.000E+00  0.000E+00  1.643E+02   0.0E+00
   36   37  1.419E+03  0.000E+00  0.000E+00  0.000E+00  1.315E-02  2.889E+02  0.000E+00   0.0E+00
   36   38  4.509E+01  1.193E+08  2.597E-05  2.698E-05  0.000E+00  0.000E+00  6.846E-03   7.1E-01
   36   39  4.489E+01  0.000E+00  0.000E+00  0.000E+00  0.000E+00  0.000E+00  2.353E+01   0.0E+00
   36   40  4.145E+01  0.000E+00  0.000E+00  0.000E+00  1.372E+04  0.000E+00  0.000E+00   0.0E+00
   36   41  4.134E+01  0.000E+00  0.000E+00  0.000E+00  4.080E+04  9.035E+00  0.000E+00   0.0E+00
   36   42  4.038E+01  0.000E+00  0.000E+00  0.000E+00  2.315E+03  1.575E-01  0.000E+00   0.0E+00
   36   43  4.034E+01  0.000E+00  0.000E+00  0.000E+00  4.324E+04  0.000E+00  0.000E+00   0.0E+00
   36   44  4.013E+01  0.000E+00  0.000E+00  0.000E+00  1.570E+05  4.990E-03  0.000E+00   0.0E+00
   36   47  3.700E+01  0.000E+00  0.000E+00  0.000E+00  0.000E+00  0.000E+00  4.635E+00   0.0E+00
   36   48  3.687E+01  4.006E+08  8.163E-05  6.935E-05  0.000E+00  0.000E+00  5.609E+00   6.3E-01
   36   49  3.680E+01  1.026E+08  1.489E-05  1.262E-05  0.000E+00  0.000E+00  2.766E+01   7.7E-01
   36   50  3.677E+01  1.599E+09  4.168E-04  3.532E-04  0.000E+00  0.000E+00  8.068E+01   8.8E-01
   36   51  3.665E+01  4.308E+08  6.198E-05  5.235E-05  0.000E+00  0.000E+00  6.035E-01   4.6E-03
   36   52  3.650E+01  1.023E+09  2.043E-04  1.719E-04  0.000E+00  0.000E+00  2.296E+02   4.3E-01
   36   53  3.597E+01  0.000E+00  0.000E+00  0.000E+00  0.000E+00  0.000E+00  7.950E+01   0.0E+00
   36   54  3.516E+01  0.000E+00  0.000E+00  0.000E+00  3.119E+02  0.000E+00  0.000E+00   0.0E+00
   36   55  3.512E+01  0.000E+00  0.000E+00  0.000E+00  4.216E+04  1.401E+01  0.000E+00   0.0E+00
   36   56  3.509E+01  0.000E+00  0.000E+00  0.000E+00  1.095E+02  1.201E+03  0.000E+00   0.0E+00
   36   57  3.506E+01  0.000E+00  0.000E+00  0.000E+00  2.722E+05  0.000E+00  0.000E+00   0.0E+00
   36   58  3.501E+01  0.000E+00  0.000E+00  0.000E+00  6.368E+04  3.358E+02  0.000E+00   0.0E+00
   36   59  3.499E+01  0.000E+00  0.000E+00  0.000E+00  5.353E+03  1.658E+03  0.000E+00   0.0E+00
   36   60  3.497E+01  0.000E+00  0.000E+00  0.000E+00  2.664E+01  1.615E+03  0.000E+00   0.0E+00
   36   62  3.493E+01  0.000E+00  0.000E+00  0.000E+00  2.761E+05  1.052E+03  0.000E+00   0.0E+00
   36   63  3.496E+01  0.000E+00  0.000E+00  0.000E+00  0.000E+00  0.000E+00  1.030E+00   0.0E+00
   36   64  3.278E+01  0.000E+00  0.000E+00  0.000E+00  1.000E+04  0.000E+00  0.000E+00   0.0E+00
   36   66  3.209E+01  0.000E+00  0.000E+00  0.000E+00  5.215E+05  0.000E+00  0.000E+00   0.0E+00
   36   67  3.206E+01  0.000E+00  0.000E+00  0.000E+00  6.420E+04  2.172E+03  0.000E+00   0.0E+00
   36   68  2.989E+01  3.388E+07  3.240E-06  2.231E-06  0.000E+00  0.000E+00  1.890E+01   1.6E-02
   36   69  2.975E+01  1.736E+09  1.645E-04  1.128E-04  0.000E+00  0.000E+00  4.236E+02   3.6E-02
   36   70  2.970E+01  8.733E+07  1.155E-05  7.908E-06  0.000E+00  0.000E+00  4.765E+01   1.2E-01
   36   71  2.957E+01  0.000E+00  0.000E+00  0.000E+00  0.000E+00  0.000E+00  1.702E+02   0.0E+00
   36   72  2.868E+01  0.000E+00  0.000E+00  0.000E+00  1.164E+03  1.871E+02  0.000E+00   0.0E+00
   36   73  2.865E+01  0.000E+00  0.000E+00  0.000E+00  1.726E+04  1.785E+02  0.000E+00   0.0E+00
   36   74  2.862E+01  0.000E+00  0.000E+00  0.000E+00  2.923E+04  5.873E+02  0.000E+00   0.0E+00
   36   75  2.862E+01  0.000E+00  0.000E+00  0.000E+00  7.644E+04  3.714E+03  0.000E+00   0.0E+00
   36   76  2.229E+01  0.000E+00  0.000E+00  0.000E+00  4.686E+08  0.000E+00  0.000E+00   0.0E+00
   36   79  2.133E+01  0.000E+00  0.000E+00  0.000E+00  0.000E+00  0.000E+00  4.313E+04   0.0E+00
   36   80  2.110E+01  2.642E+11  1.260E-02  6.126E-03  0.000E+00  0.000E+00  7.136E+04   1.1E+00
   36   81  2.101E+01  0.000E+00  0.000E+00  0.000E+00  0.000E+00  0.000E+00  2.683E+04   0.0E+00
   36   82  2.095E+01  0.000E+00  0.000E+00  0.000E+00  0.000E+00  0.000E+00  2.054E+04   0.0E+00
   36   83  2.093E+01  2.295E+11  1.076E-02  5.190E-03  0.000E+00  0.000E+00  6.021E+04   1.0E+00
   36   84  2.055E+01  0.000E+00  0.000E+00  0.000E+00  1.291E+05  0.000E+00  0.000E+00   0.0E+00
   36   85  2.055E+01  0.000E+00  0.000E+00  0.000E+00  1.212E+06  5.165E+02  0.000E+00   0.0E+00
   36   86  2.043E+01  0.000E+00  0.000E+00  0.000E+00  1.245E+07  6.766E+02  0.000E+00   0.0E+00
   36   87  2.042E+01  0.000E+00  0.000E+00  0.000E+00  6.822E+04  0.000E+00  0.000E+00   0.0E+00
   36   88  2.039E+01  0.000E+00  0.000E+00  0.000E+00  2.591E+06  1.080E+02  0.000E+00   0.0E+00
   36   90  2.011E+01  0.000E+00  0.000E+00  0.000E+00  5.928E+07  0.000E+00  0.000E+00   0.0E+00
   36   91  2.008E+01  0.000E+00  0.000E+00  0.000E+00  3.419E+08  2.330E+04  0.000E+00   0.0E+00
   36   92  2.004E+01  0.000E+00  0.000E+00  0.000E+00  6.046E+08  4.742E+04  0.000E+00   0.0E+00
   36   94  1.997E+01  0.000E+00  0.000E+00  0.000E+00  0.000E+00  0.000E+00  2.533E+00   0.0E+00
   36   95  1.995E+01  7.732E+07  4.615E-06  2.122E-06  0.000E+00  0.000E+00  5.286E+02   4.6E-02
   36   96  1.994E+01  3.948E+08  1.681E-05  7.727E-06  0.000E+00  0.000E+00  2.565E+02   1.6E+00
   36   97  1.994E+01  1.156E+08  8.857E-06  4.069E-06  0.000E+00  0.000E+00  3.031E+02   1.1E+00
   36   98  1.992E+01  1.003E+09  4.264E-05  1.957E-05  0.000E+00  0.000E+00  9.468E+01   5.4E-01
   36   99  1.994E+01  0.000E+00  0.000E+00  0.000E+00  1.099E+07  2.232E+04  0.000E+00   0.0E+00
   36  100  1.990E+01  1.206E+09  7.163E-05  3.285E-05  0.000E+00  0.000E+00  1.437E+02   4.4E-03
   36  101  1.982E+01  0.000E+00  0.000E+00  0.000E+00  0.000E+00  0.000E+00  9.035E+02   0.0E+00
   36  102  1.972E+01  1.274E+10  5.305E-04  2.411E-04  0.000E+00  0.000E+00  6.433E-01   1.0E+00
   36  103  1.970E+01  2.102E+11  1.223E-02  5.555E-03  0.000E+00  0.000E+00  1.855E+05   1.0E+00
   36  104  1.969E+01  0.000E+00  0.000E+00  0.000E+00  1.840E+04  6.586E+00  0.000E+00   0.0E+00
   36  105  1.969E+01  0.000E+00  0.000E+00  0.000E+00  3.626E+06  0.000E+00  0.000E+00   0.0E+00
   36  106  1.968E+01  0.000E+00  0.000E+00  0.000E+00  4.109E+05  0.000E+00  0.000E+00   0.0E+00
   36  107  1.968E+01  0.000E+00  0.000E+00  0.000E+00  1.572E+07  3.765E+00  0.000E+00   0.0E+00
   36  108  1.967E+01  0.000E+00  0.000E+00  0.000E+00  1.528E+06  2.439E+01  0.000E+00   0.0E+00
   36  109  1.967E+01  5.877E+10  3.411E-03  1.546E-03  0.000E+00  0.000E+00  1.243E+04   1.0E+00
   36  110  1.967E+01  0.000E+00  0.000E+00  0.000E+00  2.933E+06  1.255E+03  0.000E+00   0.0E+00
   36  111  1.967E+01  1.793E+12  1.337E-01  6.058E-02  0.000E+00  0.000E+00  9.381E+05   1.0E+00
   36  112  1.966E+01  0.000E+00  0.000E+00  0.000E+00  1.758E+07  1.997E+00  0.000E+00   0.0E+00
   36  113  1.966E+01  0.000E+00  0.000E+00  0.000E+00  1.009E+05  3.991E+02  0.000E+00   0.0E+00
   36  114  1.965E+01  0.000E+00  0.000E+00  0.000E+00  0.000E+00  0.000E+00  1.405E+00   0.0E+00
   36  116  1.964E+01  7.943E+09  5.903E-04  2.671E-04  0.000E+00  0.000E+00  4.716E+03   9.9E-01
   36  117  1.963E+01  0.000E+00  0.000E+00  0.000E+00  0.000E+00  0.000E+00  2.249E+02   0.0E+00
   36  118  1.952E+01  6.283E+11  3.588E-02  1.614E-02  0.000E+00  0.000E+00  3.137E+00   9.9E-01
   36  119  1.950E+01  1.009E+13  7.397E-01  3.325E-01  0.000E+00  0.000E+00  5.372E+06   9.9E-01
   36  120  1.949E+01  3.974E+10  1.616E-03  7.257E-04  0.000E+00  0.000E+00  6.191E+00   9.9E-01
   36  121  1.947E+01  4.184E+11  2.377E-02  1.066E-02  0.000E+00  0.000E+00  7.673E+05   9.9E-01
   36  123  1.850E+01  0.000E+00  0.000E+00  0.000E+00  0.000E+00  0.000E+00  5.356E+00   0.0E+00
   36  124  1.817E+01  0.000E+00  0.000E+00  0.000E+00  2.385E+05  0.000E+00  0.000E+00   0.0E+00
   36  126  1.807E+01  0.000E+00  0.000E+00  0.000E+00  8.360E+06  0.000E+00  0.000E+00   0.0E+00
   36  127  1.806E+01  0.000E+00  0.000E+00  0.000E+00  8.907E+05  4.800E+02  0.000E+00   0.0E+00
   36  128  1.771E+01  8.420E+07  2.828E-06  1.154E-06  0.000E+00  0.000E+00  1.464E+02   1.3E-01
   36  129  1.768E+01  4.846E+09  1.623E-04  6.612E-05  0.000E+00  0.000E+00  3.526E+03   7.5E-02
   36  130  1.768E+01  2.896E+08  1.356E-05  5.526E-06  0.000E+00  0.000E+00  2.784E+02   1.1E-02
   36  131  1.766E+01  0.000E+00  0.000E+00  0.000E+00  0.000E+00  0.000E+00  1.017E+03   0.0E+00
   36  132  1.749E+01  0.000E+00  0.000E+00  0.000E+00  3.675E+02  5.823E+01  0.000E+00   0.0E+00
   36  133  1.749E+01  0.000E+00  0.000E+00  0.000E+00  7.532E+05  6.192E+01  0.000E+00   0.0E+00
   36  134  1.748E+01  0.000E+00  0.000E+00  0.000E+00  2.511E+05  1.503E+02  0.000E+00   0.0E+00
   36  135  1.748E+01  0.000E+00  0.000E+00  0.000E+00  3.322E+06  1.051E+03  0.000E+00   0.0E+00
   36  136  1.746E+01  5.070E+07  2.978E-06  1.198E-06  0.000E+00  0.000E+00  5.740E+01   8.6E-01
   36  137  1.745E+01  3.693E+08  1.687E-05  6.784E-06  0.000E+00  0.000E+00  5.084E+01   8.6E-01
   36  138  1.745E+01  0.000E+00  0.000E+00  0.000E+00  0.000E+00  0.000E+00  8.081E+01   0.0E+00
   36  139  1.745E+01  7.865E+09  4.616E-04  1.856E-04  0.000E+00  0.000E+00  4.102E+03   8.6E-01
   37   38  4.657E+01  1.376E+06  4.474E-07  3.429E-07  0.000E+00  0.000E+00  2.163E-01   6.9E-01
   37   39  4.636E+01  1.786E+08  3.454E-05  2.635E-05  0.000E+00  0.000E+00  1.654E+00   8.7E-01
   37   40  4.270E+01  0.000E+00  0.000E+00  0.000E+00  2.118E+03  1.787E+01  0.000E+00   0.0E+00
   37   41  4.258E+01  0.000E+00  0.000E+00  0.000E+00  3.072E+03  5.169E+00  0.000E+00   0.0E+00
   37   42  4.156E+01  0.000E+00  0.000E+00  0.000E+00  1.347E+02  1.494E+02  0.000E+00   0.0E+00
   37   43  4.153E+01  0.000E+00  0.000E+00  0.000E+00  1.595E+05  1.105E+01  0.000E+00   0.0E+00
   37   44  4.129E+01  0.000E+00  0.000E+00  0.000E+00  6.481E+02  1.756E+02  0.000E+00   0.0E+00
   37   45  4.022E+01  0.000E+00  0.000E+00  0.000E+00  2.333E+04  0.000E+00  0.000E+00   0.0E+00
   37   46  3.812E+01  0.000E+00  0.000E+00  0.000E+00  0.000E+00  0.000E+00  2.825E+01   0.0E+00
   37   47  3.799E+01  1.783E+07  2.315E-06  1.448E-06  0.000E+00  0.000E+00  2.995E+01   1.1E-01
   37   48  3.785E+01  2.217E+08  6.665E-05  4.153E-05  0.000E+00  0.000E+00  6.249E-01   5.2E-01
   37   49  3.778E+01  2.900E+07  6.204E-06  3.858E-06  0.000E+00  0.000E+00  1.923E+01   1.6E-01
   37   50  3.775E+01  0.000E+00  0.000E+00  0.000E+00  0.000E+00  0.000E+00  3.857E+01   0.0E+00
   37   51  3.762E+01  4.039E+08  8.571E-05  5.308E-05  0.000E+00  0.000E+00  8.078E+01   8.2E-01
   37   52  3.747E+01  2.922E+08  8.608E-05  5.309E-05  0.000E+00  0.000E+00  1.662E+00   6.7E-01
   37   53  3.691E+01  9.300E+08  1.140E-04  6.922E-05  0.000E+00  0.000E+00  1.413E+01   5.8E-01
   37   54  3.605E+01  0.000E+00  0.000E+00  0.000E+00  1.323E+02  4.282E+02  0.000E+00   0.0E+00
   37   55  3.601E+01  0.000E+00  0.000E+00  0.000E+00  6.292E+04  0.000E+00  0.000E+00   0.0E+00
   37   56  3.598E+01  0.000E+00  0.000E+00  0.000E+00  1.371E+02  2.091E+02  0.000E+00   0.0E+00
   37   58  3.590E+01  0.000E+00  0.000E+00  0.000E+00  1.740E+03  1.517E+02  0.000E+00   0.0E+00
   37   59  3.587E+01  0.000E+00  0.000E+00  0.000E+00  9.797E+03  5.430E+01  0.000E+00   0.0E+00
   37   60  3.585E+01  0.000E+00  0.000E+00  0.000E+00  1.193E+05  6.855E+00  0.000E+00   0.0E+00
   37   61  3.592E+01  0.000E+00  0.000E+00  0.000E+00  0.000E+00  0.000E+00  1.101E+01   0.0E+00
   37   62  3.581E+01  0.000E+00  0.000E+00  0.000E+00  3.544E+04  0.000E+00  0.000E+00   0.0E+00
   37   63  3.584E+01  4.310E+08  4.981E-05  2.939E-05  0.000E+00  0.000E+00  1.922E+00   7.9E-01
   37   64  3.356E+01  0.000E+00  0.000E+00  0.000E+00  1.327E+05  7.160E+01  0.000E+00   0.0E+00
   37   65  3.297E+01  0.000E+00  0.000E+00  0.000E+00  2.436E+05  0.000E+00  0.000E+00   0.0E+00
   37   66  3.284E+01  0.000E+00  0.000E+00  0.000E+00  6.728E+04  2.052E+02  0.000E+00   0.0E+00
   37   67  3.280E+01  0.000E+00  0.000E+00  0.000E+00  1.058E+04  1.592E+02  0.000E+00   0.0E+00
   37   68  3.053E+01  2.451E+08  3.424E-05  1.721E-05  0.000E+00  0.000E+00  1.122E+00   1.0E+00
   37   69  3.039E+01  1.680E+08  2.325E-05  1.163E-05  0.000E+00  0.000E+00  5.083E+01   1.1E+00
   37   70  3.034E+01  1.056E+09  2.040E-04  1.019E-04  0.000E+00  0.000E+00  1.254E+02   7.0E-01
   37   71  3.020E+01  4.631E+08  3.800E-05  1.889E-05  0.000E+00  0.000E+00  6.305E+00   9.2E-01
   37   72  2.927E+01  0.000E+00  0.000E+00  0.000E+00  1.175E+05  5.153E+00  0.000E+00   0.0E+00
   37   73  2.924E+01  0.000E+00  0.000E+00  0.000E+00  2.575E+02  8.864E+01  0.000E+00   0.0E+00
   37   74  2.921E+01  0.000E+00  0.000E+00  0.000E+00  3.498E+05  0.000E+00  0.000E+00   0.0E+00
   37   75  2.921E+01  0.000E+00  0.000E+00  0.000E+00  1.101E+05  2.471E+03  0.000E+00   0.0E+00
   37   76  2.265E+01  0.000E+00  0.000E+00  0.000E+00  1.165E+07  1.162E-02  0.000E+00   0.0E+00
   37   77  2.247E+01  0.000E+00  0.000E+00  0.000E+00  9.714E+08  0.000E+00  0.000E+00   0.0E+00
   37   78  2.167E+01  0.000E+00  0.000E+00  0.000E+00  0.000E+00  0.000E+00  7.596E+04   0.0E+00
   37   79  2.166E+01  9.343E+10  3.943E-03  1.406E-03  0.000E+00  0.000E+00  1.161E+04   9.4E-01
   37   80  2.142E+01  1.673E+09  1.151E-04  4.057E-05  0.000E+00  0.000E+00  1.515E+04   1.1E+00
   37   81  2.133E+01  3.762E+11  1.540E-02  5.406E-03  0.000E+00  0.000E+00  8.440E+04   9.7E-01
   37   82  2.126E+01  1.661E+11  6.757E-03  2.365E-03  0.000E+00  0.000E+00  1.716E+04   9.6E-01
   37   83  2.124E+01  1.471E+09  9.948E-05  3.478E-05  0.000E+00  0.000E+00  1.292E+04   1.0E+00
   37   84  2.085E+01  0.000E+00  0.000E+00  0.000E+00  7.180E+04  6.716E+00  0.000E+00   0.0E+00
   37   85  2.085E+01  0.000E+00  0.000E+00  0.000E+00  1.593E+06  1.672E-01  0.000E+00   0.0E+00
   37   86  2.073E+01  0.000E+00  0.000E+00  0.000E+00  1.722E+05  3.925E+01  0.000E+00   0.0E+00
   37   87  2.071E+01  0.000E+00  0.000E+00  0.000E+00  1.732E+06  1.183E+02  0.000E+00   0.0E+00
   37   88  2.069E+01  0.000E+00  0.000E+00  0.000E+00  4.287E+06  6.939E-01  0.000E+00   0.0E+00
   37   89  2.056E+01  0.000E+00  0.000E+00  0.000E+00  7.303E+06  0.000E+00  0.000E+00   0.0E+00
   37   90  2.040E+01  0.000E+00  0.000E+00  0.000E+00  1.684E+07  4.286E+04  0.000E+00   0.0E+00
   37   91  2.037E+01  0.000E+00  0.000E+00  0.000E+00  7.188E+06  8.480E+03  0.000E+00   0.0E+00
   37   92  2.032E+01  0.000E+00  0.000E+00  0.000E+00  8.571E+06  9.288E+01  0.000E+00   0.0E+00
   37   93  2.027E+01  0.000E+00  0.000E+00  0.000E+00  0.000E+00  0.000E+00  4.096E+01   0.0E+00
   37   94  2.025E+01  7.081E+07  2.613E-06  8.713E-07  0.000E+00  0.000E+00  9.197E+01   7.6E-01
   37   95  2.024E+01  6.045E+09  5.197E-04  1.731E-04  0.000E+00  0.000E+00  1.511E+03   1.1E+00
   37   96  2.023E+01  1.800E+07  1.104E-06  3.677E-07  0.000E+00  0.000E+00  7.011E+01   4.3E-01
   37   97  2.022E+01  0.000E+00  0.000E+00  0.000E+00  0.000E+00  0.000E+00  5.700E+00   0.0E+00
   37   98  2.020E+01  4.429E+08  2.711E-05  9.015E-06  0.000E+00  0.000E+00  3.086E+02   8.1E-02
   37   99  2.023E+01  0.000E+00  0.000E+00  0.000E+00  8.682E+08  3.218E+04  0.000E+00   0.0E+00
   37  100  2.018E+01  7.428E+09  6.351E-04  2.110E-04  0.000E+00  0.000E+00  2.815E+03   1.0E+00
   37  101  2.010E+01  1.438E+09  5.227E-05  1.729E-05  0.000E+00  0.000E+00  1.514E+02   2.5E-02
   37  102  2.000E+01  1.535E+10  9.200E-04  3.028E-04  0.000E+00  0.000E+00  1.141E+04   1.0E+00
   37  103  1.998E+01  1.040E+12  8.713E-02  2.866E-02  0.000E+00  0.000E+00  5.863E+05   1.0E+00
   37  104  1.997E+01  0.000E+00  0.000E+00  0.000E+00  7.467E+04  0.000E+00  0.000E+00   0.0E+00
   37  105  1.996E+01  0.000E+00  0.000E+00  0.000E+00  1.067E+06  2.289E+03  0.000E+00   0.0E+00
   37  107  1.995E+01  0.000E+00  0.000E+00  0.000E+00  1.388E+06  9.092E+02  0.000E+00   0.0E+00
   37  108  1.995E+01  0.000E+00  0.000E+00  0.000E+00  1.670E+04  3.466E+01  0.000E+00   0.0E+00
   37  109  1.995E+01  9.760E+11  8.155E-02  2.678E-02  0.000E+00  0.000E+00  1.281E+05   1.0E+00
   37  110  1.994E+01  0.000E+00  0.000E+00  0.000E+00  1.527E+07  4.933E+02  0.000E+00   0.0E+00
   37  111  1.994E+01  0.000E+00  0.000E+00  0.000E+00  0.000E+00  0.000E+00  1.725E+05   0.0E+00
   37  112  1.994E+01  0.000E+00  0.000E+00  0.000E+00  3.453E+05  3.147E-01  0.000E+00   0.0E+00
   37  113  1.994E+01  0.000E+00  0.000E+00  0.000E+00  8.359E+04  0.000E+00  0.000E+00   0.0E+00
   37  116  1.991E+01  0.000E+00  0.000E+00  0.000E+00  0.000E+00  0.000E+00  1.149E+03   0.0E+00
   37  118  1.979E+01  2.553E+12  2.098E-01  6.834E-02  0.000E+00  0.000E+00  1.180E+05   9.9E-01
   37  119  1.977E+01  0.000E+00  0.000E+00  0.000E+00  0.000E+00  0.000E+00  9.689E+05   0.0E+00
   37  120  1.976E+01  4.805E+10  2.812E-03  9.146E-04  0.000E+00  0.000E+00  3.875E+04   9.9E-01
   37  121  1.974E+01  7.123E+12  5.823E-01  1.892E-01  0.000E+00  0.000E+00  2.920E+06   9.9E-01
   37  122  1.875E+01  0.000E+00  0.000E+00  0.000E+00  0.000E+00  0.000E+00  1.735E+02   0.0E+00
   37  123  1.874E+01  5.689E+08  1.798E-05  5.545E-06  0.000E+00  0.000E+00  1.257E+02   7.1E-01
   37  124  1.841E+01  0.000E+00  0.000E+00  0.000E+00  6.405E+05  3.341E+01  0.000E+00   0.0E+00
   37  125  1.833E+01  0.000E+00  0.000E+00  0.000E+00  1.351E+06  0.000E+00  0.000E+00   0.0E+00
   37  126  1.830E+01  0.000E+00  0.000E+00  0.000E+00  2.909E+05  1.160E+01  0.000E+00   0.0E+00
   37  127  1.829E+01  0.000E+00  0.000E+00  0.000E+00  1.813E+05  4.577E-01  0.000E+00   0.0E+00
   37  128  1.793E+01  1.574E+08  7.587E-06  2.239E-06  0.000E+00  0.000E+00  1.119E+01   4.4E-01
   37  129  1.791E+01  1.194E+08  5.741E-06  1.692E-06  0.000E+00  0.000E+00  1.003E+02   4.7E-01
   37  130  1.790E+01  1.600E+09  1.076E-04  3.170E-05  0.000E+00  0.000E+00  5.426E+02   7.8E-01
   37  131  1.788E+01  5.909E+08  1.699E-05  5.001E-06  0.000E+00  0.000E+00  5.089E+01   4.6E-02
   37  132  1.771E+01  0.000E+00  0.000E+00  0.000E+00  1.659E+03  4.071E-02  0.000E+00   0.0E+00
   37  133  1.770E+01  0.000E+00  0.000E+00  0.000E+00  2.792E+05  1.185E+01  0.000E+00   0.0E+00
   37  134  1.770E+01  0.000E+00  0.000E+00  0.000E+00  5.686E+04  0.000E+00  0.000E+00   0.0E+00
   37  135  1.770E+01  0.000E+00  0.000E+00  0.000E+00  5.944E+01  5.169E+02  0.000E+00   0.0E+00
   37  136  1.767E+01  0.000E+00  0.000E+00  0.000E+00  0.000E+00  0.000E+00  5.141E+01   0.0E+00
   37  137  1.767E+01  3.992E+09  2.617E-04  7.611E-05  0.000E+00  0.000E+00  3.490E+02   9.2E-01
   37  139  1.767E+01  0.000E+00  0.000E+00  0.000E+00  0.000E+00  0.000E+00  1.728E+03   0.0E+00
   38   39  1.048E+04  0.000E+00  0.000E+00  0.000E+00  3.252E-07  6.837E+00  0.000E+00   0.0E+00
   38   40  5.142E+02  2.394E+09  5.695E-02  4.821E-01  0.000E+00  0.000E+00  3.795E-02   1.0E+00
   38   41  4.976E+02  1.360E+09  5.047E-02  4.135E-01  0.000E+00  0.000E+00  2.030E-04   1.0E+00
   38   42  3.863E+02  6.041E+09  1.892E-01  1.203E+00  0.000E+00  0.000E+00  1.819E+00   1.0E+00
   38   43  3.835E+02  3.124E+08  4.134E-03  2.609E-02  0.000E+00  0.000E+00  4.101E+00   1.2E+00
   38   44  3.647E+02  3.690E+09  7.360E-02  4.419E-01  0.000E+00  0.000E+00  4.138E+00   9.7E-01
   38   45  2.954E+02  0.000E+00  0.000E+00  0.000E+00  0.000E+00  0.000E+00  1.732E+01   0.0E+00
   38   46  2.101E+02  0.000E+00  0.000E+00  0.000E+00  1.640E+05  0.000E+00  0.000E+00   0.0E+00
   38   47  2.063E+02  0.000E+00  0.000E+00  0.000E+00  1.792E+05  7.955E+02  0.000E+00   0.0E+00
   38   48  2.022E+02  0.000E+00  0.000E+00  0.000E+00  8.562E+04  9.946E-01  0.000E+00   0.0E+00
   38   49  2.002E+02  0.000E+00  0.000E+00  0.000E+00  2.072E+05  1.159E+00  0.000E+00   0.0E+00
   38   50  1.994E+02  0.000E+00  0.000E+00  0.000E+00  2.146E+05  0.000E+00  0.000E+00   0.0E+00
   38   51  1.959E+02  0.000E+00  0.000E+00  0.000E+00  2.344E+03  3.863E+00  0.000E+00   0.0E+00
   38   52  1.917E+02  0.000E+00  0.000E+00  0.000E+00  1.480E+05  3.494E+00  0.000E+00   0.0E+00
   38   53  1.779E+02  0.000E+00  0.000E+00  0.000E+00  1.479E+03  6.132E+04  0.000E+00   0.0E+00
   38   54  1.596E+02  2.338E+05  5.359E-07  1.408E-06  0.000E+00  0.000E+00  1.033E-03   1.0E+00
   38   55  1.589E+02  0.000E+00  0.000E+00  0.000E+00  0.000E+00  0.000E+00  1.105E-05   0.0E+00
   38   56  1.582E+02  2.293E+06  8.608E-06  2.242E-05  0.000E+00  0.000E+00  2.848E-03   9.8E-01
   38   58  1.567E+02  1.848E+06  9.519E-06  2.455E-05  0.000E+00  0.000E+00  3.773E-03   1.0E+00
   38   59  1.562E+02  6.032E+04  2.206E-07  5.671E-07  0.000E+00  0.000E+00  2.180E-03   8.8E-01
   38   60  1.558E+02  4.285E+06  2.183E-05  5.597E-05  0.000E+00  0.000E+00  1.452E-02   1.0E+00
   38   61  1.571E+02  0.000E+00  0.000E+00  0.000E+00  4.234E+03  0.000E+00  0.000E+00   0.0E+00
   38   62  1.550E+02  0.000E+00  0.000E+00  0.000E+00  0.000E+00  0.000E+00  1.599E-03   0.0E+00
   38   63  1.557E+02  0.000E+00  0.000E+00  0.000E+00  1.793E+03  3.782E+06  0.000E+00   0.0E+00
   38   64  1.201E+02  1.157E+07  1.501E-05  2.968E-05  0.000E+00  0.000E+00  2.044E-01   7.4E-01
   38   65  1.129E+02  0.000E+00  0.000E+00  0.000E+00  0.000E+00  0.000E+00  1.920E+01   0.0E+00
   38   66  1.114E+02  2.703E+08  3.016E-04  5.528E-04  0.000E+00  0.000E+00  2.772E-01   5.7E-01
   38   67  1.109E+02  2.327E+07  4.291E-05  7.833E-05  0.000E+00  0.000E+00  3.552E-04   3.7E-01
   38   68  8.863E+01  0.000E+00  0.000E+00  0.000E+00  1.529E+02  3.494E+00  0.000E+00   0.0E+00
   38   69  8.745E+01  0.000E+00  0.000E+00  0.000E+00  7.946E+03  6.618E+01  0.000E+00   0.0E+00
   38   70  8.706E+01  0.000E+00  0.000E+00  0.000E+00  2.424E+03  1.447E+01  0.000E+00   0.0E+00
   38   71  8.595E+01  0.000E+00  0.000E+00  0.000E+00  5.606E+03  1.056E+03  0.000E+00   0.0E+00
   38   72  7.879E+01  2.519E+05  3.283E-07  4.258E-07  0.000E+00  0.000E+00  1.297E-03   9.8E-01
   38   73  7.859E+01  8.836E+05  8.182E-07  1.058E-06  0.000E+00  0.000E+00  5.884E-04   1.0E+00
   38   74  7.837E+01  0.000E+00  0.000E+00  0.000E+00  0.000E+00  0.000E+00  3.829E-03   0.0E+00
   38   75  7.834E+01  1.101E+07  1.418E-05  1.828E-05  0.000E+00  0.000E+00  2.095E-01   1.0E+00
   38   76  4.408E+01  3.186E+11  5.569E-02  4.041E-02  0.000E+00  0.000E+00  8.425E+03   6.9E-01
   38   77  4.342E+01  0.000E+00  0.000E+00  0.000E+00  0.000E+00  0.000E+00  1.711E+04   0.0E+00
   38   78  4.052E+01  0.000E+00  0.000E+00  0.000E+00  1.278E+05  0.000E+00  0.000E+00   0.0E+00
   38   79  4.050E+01  0.000E+00  0.000E+00  0.000E+00  7.589E+04  1.815E+03  0.000E+00   0.0E+00
   38   80  3.967E+01  0.000E+00  0.000E+00  0.000E+00  4.032E+04  1.318E+02  0.000E+00   0.0E+00
   38   81  3.936E+01  0.000E+00  0.000E+00  0.000E+00  1.388E+04  1.382E+03  0.000E+00   0.0E+00
   38   82  3.913E+01  0.000E+00  0.000E+00  0.000E+00  7.438E+03  2.651E+03  0.000E+00   0.0E+00
   38   83  3.906E+01  0.000E+00  0.000E+00  0.000E+00  4.095E+03  2.857E+02  0.000E+00   0.0E+00
   38   84  3.777E+01  4.765E+11  6.114E-02  3.801E-02  0.000E+00  0.000E+00  1.355E+03   1.0E+00
   38   85  3.776E+01  2.633E+11  5.629E-02  3.499E-02  0.000E+00  0.000E+00  1.653E+01   1.0E+00
   38   86  3.736E+01  4.902E+11  1.436E-01  8.829E-02  0.000E+00  0.000E+00  1.516E+04   9.9E-01
   38   87  3.731E+01  2.706E+10  3.389E-03  2.081E-03  0.000E+00  0.000E+00  3.642E+04   1.0E+00
   38   88  3.724E+01  2.519E+11  5.237E-02  3.210E-02  0.000E+00  0.000E+00  2.678E+04   1.0E+00
   38   89  3.680E+01  0.000E+00  0.000E+00  0.000E+00  0.000E+00  0.000E+00  3.743E+04   0.0E+00
   38   90  3.629E+01  2.343E+08  2.775E-05  1.658E-05  0.000E+00  0.000E+00  4.239E+01   1.0E+00
   38   91  3.622E+01  2.335E+09  4.591E-04  2.737E-04  0.000E+00  0.000E+00  7.502E+00   9.9E-01
   38   92  3.606E+01  1.141E+10  3.116E-03  1.850E-03  0.000E+00  0.000E+00  7.041E+02   9.7E-01
   38   93  3.590E+01  0.000E+00  0.000E+00  0.000E+00  5.664E+08  0.000E+00  0.000E+00   0.0E+00
   38   94  3.585E+01  0.000E+00  0.000E+00  0.000E+00  5.629E+08  1.643E+01  0.000E+00   0.0E+00
   38   95  3.579E+01  0.000E+00  0.000E+00  0.000E+00  2.384E+08  4.039E+00  0.000E+00   0.0E+00
   38   96  3.576E+01  0.000E+00  0.000E+00  0.000E+00  5.424E+08  1.706E+00  0.000E+00   0.0E+00
   38   97  3.574E+01  0.000E+00  0.000E+00  0.000E+00  5.605E+08  0.000E+00  0.000E+00   0.0E+00
   38   98  3.569E+01  0.000E+00  0.000E+00  0.000E+00  1.705E+07  6.437E-01  0.000E+00   0.0E+00
   38   99  3.576E+01  1.378E+08  2.643E-05  1.556E-05  0.000E+00  0.000E+00  1.835E+02   1.0E+00
   38  100  3.562E+01  0.000E+00  0.000E+00  0.000E+00  3.184E+08  4.894E-04  0.000E+00   0.0E+00
   38  101  3.536E+01  0.000E+00  0.000E+00  0.000E+00  7.364E+05  1.444E+02  0.000E+00   0.0E+00
   38  102  3.505E+01  0.000E+00  0.000E+00  0.000E+00  3.776E+04  7.267E-02  0.000E+00   0.0E+00
   38  103  3.500E+01  0.000E+00  0.000E+00  0.000E+00  1.654E+05  2.804E-02  0.000E+00   0.0E+00
   38  104  3.496E+01  0.000E+00  0.000E+00  0.000E+00  0.000E+00  0.000E+00  8.474E-03   0.0E+00
   38  105  3.494E+01  4.230E+03  4.645E-10  2.672E-10  0.000E+00  0.000E+00  3.163E-01   4.3E-01
   38  107  3.492E+01  1.080E+04  1.974E-09  1.135E-09  0.000E+00  0.000E+00  1.650E-02   8.9E-01
   38  108  3.490E+01  1.113E+05  2.846E-08  1.635E-08  0.000E+00  0.000E+00  3.067E-01   8.0E-01
   38  109  3.491E+01  0.000E+00  0.000E+00  0.000E+00  8.003E+03  4.356E-02  0.000E+00   0.0E+00
   38  110  3.488E+01  1.755E+04  3.201E-09  1.838E-09  0.000E+00  0.000E+00  2.233E-01   8.9E-01
   38  111  3.489E+01  0.000E+00  0.000E+00  0.000E+00  2.656E+05  0.000E+00  0.000E+00   0.0E+00
   38  112  3.487E+01  6.731E+05  1.718E-07  9.858E-08  0.000E+00  0.000E+00  6.447E-02   7.6E-01
   38  113  3.486E+01  0.000E+00  0.000E+00  0.000E+00  0.000E+00  0.000E+00  1.607E+00   0.0E+00
   38  116  3.478E+01  0.000E+00  0.000E+00  0.000E+00  8.743E+02  0.000E+00  0.000E+00   0.0E+00
   38  118  3.441E+01  0.000E+00  0.000E+00  0.000E+00  4.045E+04  1.699E-01  0.000E+00   0.0E+00
   38  119  3.437E+01  0.000E+00  0.000E+00  0.000E+00  2.951E+05  0.000E+00  0.000E+00   0.0E+00
   38  120  3.432E+01  0.000E+00  0.000E+00  0.000E+00  1.323E+04  1.579E-01  0.000E+00   0.0E+00
   38  121  3.425E+01  0.000E+00  0.000E+00  0.000E+00  3.517E+04  1.703E-02  0.000E+00   0.0E+00
   38  122  3.139E+01  0.000E+00  0.000E+00  0.000E+00  9.778E+02  0.000E+00  0.000E+00   0.0E+00
   38  123  3.137E+01  0.000E+00  0.000E+00  0.000E+00  7.060E+02  7.679E-01  0.000E+00   0.0E+00
   38  124  3.045E+01  1.527E+07  1.273E-06  6.382E-07  0.000E+00  0.000E+00  4.326E+00   9.6E-01
   38  125  3.024E+01  0.000E+00  0.000E+00  0.000E+00  0.000E+00  0.000E+00  3.111E+00   0.0E+00
   38  126  3.015E+01  3.652E+07  2.985E-06  1.481E-06  0.000E+00  0.000E+00  3.170E+01   2.6E+00
   38  127  3.013E+01  1.465E+07  1.994E-06  9.888E-07  0.000E+00  0.000E+00  2.571E-01   5.0E-02
   38  128  2.916E+01  0.000E+00  0.000E+00  0.000E+00  1.805E+02  1.389E+00  0.000E+00   0.0E+00
   38  129  2.909E+01  0.000E+00  0.000E+00  0.000E+00  6.909E+03  4.266E-01  0.000E+00   0.0E+00
   38  130  2.907E+01  0.000E+00  0.000E+00  0.000E+00  1.978E+03  3.038E-02  0.000E+00   0.0E+00
   38  131  2.902E+01  0.000E+00  0.000E+00  0.000E+00  3.954E+03  8.802E+01  0.000E+00   0.0E+00
   38  132  2.858E+01  4.226E+04  7.244E-09  3.408E-09  0.000E+00  0.000E+00  8.852E-04   9.4E-01
   38  133  2.856E+01  2.308E+05  2.823E-08  1.327E-08  0.000E+00  0.000E+00  1.301E-01   7.0E-01
   38  134  2.855E+01  0.000E+00  0.000E+00  0.000E+00  0.000E+00  0.000E+00  2.795E-01   0.0E+00
   38  135  2.855E+01  1.217E+06  2.082E-07  9.786E-08  0.000E+00  0.000E+00  1.929E+00   7.4E-01
   38  136  2.849E+01  0.000E+00  0.000E+00  0.000E+00  2.172E+02  0.000E+00  0.000E+00   0.0E+00
   38  137  2.848E+01  0.000E+00  0.000E+00  0.000E+00  2.124E+03  5.328E-04  0.000E+00   0.0E+00
   38  139  2.847E+01  0.000E+00  0.000E+00  0.000E+00  1.349E+04  0.000E+00  0.000E+00   0.0E+00
   39   40  5.408E+02  1.078E+08  4.725E-03  2.524E-02  0.000E+00  0.000E+00  3.738E-03   9.2E-01
   39   41  5.225E+02  1.246E+09  8.495E-02  4.383E-01  0.000E+00  0.000E+00  3.639E-05   1.1E+00
   39   42  4.011E+02  0.000E+00  0.000E+00  0.000E+00  0.000E+00  0.000E+00  2.249E+00   0.0E+00
   39   43  3.981E+02  5.101E+09  1.212E-01  4.764E-01  0.000E+00  0.000E+00  4.058E-01   1.1E+00
   39   44  3.779E+02  3.167E+09  1.130E-01  4.218E-01  0.000E+00  0.000E+00  1.454E+00   1.0E+00
   39   45  3.039E+02  1.317E+10  6.080E-02  1.825E-01  0.000E+00  0.000E+00  0.000E+00   8.8E-01
   39   46  2.144E+02  0.000E+00  0.000E+00  0.000E+00  0.000E+00  7.444E+02  0.000E+00   0.0E+00
   39   47  2.105E+02  0.000E+00  0.000E+00  0.000E+00  5.529E+02  1.765E+01  0.000E+00   0.0E+00
   39   48  2.062E+02  0.000E+00  0.000E+00  0.000E+00  1.037E+05  0.000E+00  0.000E+00   0.0E+00
   39   49  2.041E+02  0.000E+00  0.000E+00  0.000E+00  1.693E+03  4.114E+01  0.000E+00   0.0E+00
   39   51  1.996E+02  0.000E+00  0.000E+00  0.000E+00  2.057E+05  9.310E+00  0.000E+00   0.0E+00
   39   52  1.953E+02  0.000E+00  0.000E+00  0.000E+00  1.038E+05  0.000E+00  0.000E+00   0.0E+00
   39   53  1.810E+02  0.000E+00  0.000E+00  0.000E+00  3.547E+05  1.320E+04  0.000E+00   0.0E+00
   39   54  1.621E+02  1.973E+06  7.771E-06  1.244E-05  0.000E+00  0.000E+00  2.724E-03   1.0E+00
   39   56  1.607E+02  1.403E+03  9.046E-09  1.435E-08  0.000E+00  0.000E+00  2.854E-02   1.1E+00
   39   58  1.591E+02  0.000E+00  0.000E+00  0.000E+00  0.000E+00  0.000E+00  6.013E-03   0.0E+00
   39   59  1.585E+02  2.840E+07  1.784E-04  2.793E-04  0.000E+00  0.000E+00  5.692E-02   1.1E+00
   39   60  1.581E+02  0.000E+00  0.000E+00  0.000E+00  0.000E+00  0.000E+00  1.487E-01   0.0E+00
   39   61  1.595E+02  0.000E+00  0.000E+00  0.000E+00  0.000E+00  4.515E+06  0.000E+00   0.0E+00
   39   63  1.580E+02  0.000E+00  0.000E+00  0.000E+00  2.165E+04  7.436E+05  0.000E+00   0.0E+00
   39   64  1.215E+02  1.860E+06  4.117E-06  4.941E-06  0.000E+00  0.000E+00  9.963E-02   1.3E+00
   39   65  1.142E+02  2.058E+09  1.341E-03  1.512E-03  0.000E+00  0.000E+00  0.000E+00   6.5E-01
   39   66  1.126E+02  3.161E+06  6.004E-06  6.675E-06  0.000E+00  0.000E+00  1.053E+00   1.8E+00
   39   67  1.121E+02  2.931E+06  9.201E-06  1.019E-05  0.000E+00  0.000E+00  1.134E-01   6.9E-01
   39   68  8.939E+01  0.000E+00  0.000E+00  0.000E+00  2.088E+02  4.124E+01  0.000E+00   0.0E+00
   39   69  8.819E+01  0.000E+00  0.000E+00  0.000E+00  1.814E+02  1.020E+03  0.000E+00   0.0E+00
   39   70  8.779E+01  0.000E+00  0.000E+00  0.000E+00  1.058E+01  0.000E+00  0.000E+00   0.0E+00
   39   71  8.666E+01  0.000E+00  0.000E+00  0.000E+00  6.356E+04  1.393E+03  0.000E+00   0.0E+00
   39   72  7.939E+01  0.000E+00  0.000E+00  0.000E+00  0.000E+00  0.000E+00  2.908E-02   0.0E+00
   39   73  7.918E+01  4.693E+07  7.352E-05  5.750E-05  0.000E+00  0.000E+00  1.532E-01   1.1E+00
   39   75  7.893E+01  0.000E+00  0.000E+00  0.000E+00  0.000E+00  0.000E+00  3.925E-01   0.0E+00
   39   76  4.427E+01  6.407E+10  1.883E-02  8.231E-03  0.000E+00  0.000E+00  1.042E+04   6.9E-01
   39   77  4.360E+01  2.839E+11  2.697E-02  1.161E-02  0.000E+00  0.000E+00  0.000E+00   6.6E-01
   39   78  4.068E+01  0.000E+00  0.000E+00  0.000E+00  0.000E+00  6.044E+03  0.000E+00   0.0E+00
   39   79  4.066E+01  0.000E+00  0.000E+00  0.000E+00  2.148E+04  1.393E+02  0.000E+00   0.0E+00
   39   80  3.982E+01  0.000E+00  0.000E+00  0.000E+00  1.733E+04  2.376E+02  0.000E+00   0.0E+00
   39   81  3.951E+01  0.000E+00  0.000E+00  0.000E+00  3.585E+05  6.071E+02  0.000E+00   0.0E+00
   39   82  3.928E+01  0.000E+00  0.000E+00  0.000E+00  2.321E+05  2.383E+01  0.000E+00   0.0E+00
   39   83  3.920E+01  0.000E+00  0.000E+00  0.000E+00  1.691E+03  4.013E+02  0.000E+00   0.0E+00
   39   84  3.791E+01  4.536E+10  9.772E-03  3.659E-03  0.000E+00  0.000E+00  1.255E+01   9.9E-01
   39   85  3.790E+01  2.938E+11  1.054E-01  3.946E-02  0.000E+00  0.000E+00  8.398E+00   9.9E-01
   39   86  3.749E+01  0.000E+00  0.000E+00  0.000E+00  0.000E+00  0.000E+00  2.344E+04   0.0E+00
   39   87  3.744E+01  4.477E+11  9.410E-02  3.480E-02  0.000E+00  0.000E+00  3.227E+03   9.9E-01
   39   88  3.737E+01  2.330E+11  8.130E-02  3.001E-02  0.000E+00  0.000E+00  1.152E+04   1.0E+00
   39   89  3.693E+01  4.680E+11  3.190E-02  1.163E-02  0.000E+00  0.000E+00  0.000E+00   1.0E+00
   39   90  3.641E+01  1.986E+09  3.947E-04  1.420E-04  0.000E+00  0.000E+00  5.809E-02   9.9E-01
   39   91  3.634E+01  4.185E+09  1.381E-03  4.957E-04  0.000E+00  0.000E+00  3.542E+00   1.0E+00
   39   92  3.619E+01  0.000E+00  0.000E+00  0.000E+00  0.000E+00  0.000E+00  3.240E+02   0.0E+00
   39   93  3.602E+01  0.000E+00  0.000E+00  0.000E+00  0.000E+00  8.874E-01  0.000E+00   0.0E+00
   39   94  3.597E+01  0.000E+00  0.000E+00  0.000E+00  8.858E+05  4.486E-02  0.000E+00   0.0E+00
   39   95  3.592E+01  0.000E+00  0.000E+00  0.000E+00  3.225E+08  0.000E+00  0.000E+00   0.0E+00
   39   96  3.588E+01  0.000E+00  0.000E+00  0.000E+00  1.637E+07  1.600E+01  0.000E+00   0.0E+00
   39   98  3.581E+01  0.000E+00  0.000E+00  0.000E+00  5.316E+08  1.007E+00  0.000E+00   0.0E+00
   39   99  3.588E+01  1.580E+09  5.083E-04  1.802E-04  0.000E+00  0.000E+00  1.724E+01   1.2E+00
   39  100  3.574E+01  0.000E+00  0.000E+00  0.000E+00  2.361E+08  0.000E+00  0.000E+00   0.0E+00
   39  101  3.548E+01  0.000E+00  0.000E+00  0.000E+00  5.582E+08  2.838E+01  0.000E+00   0.0E+00
   39  102  3.517E+01  0.000E+00  0.000E+00  0.000E+00  1.047E+05  3.950E-02  0.000E+00   0.0E+00
   39  103  3.512E+01  0.000E+00  0.000E+00  0.000E+00  7.173E+05  0.000E+00  0.000E+00   0.0E+00
   39  105  3.506E+01  8.198E+05  1.511E-07  5.231E-08  0.000E+00  0.000E+00  2.316E+00   8.7E-01
   39  107  3.503E+01  3.880E+04  1.190E-08  4.116E-09  0.000E+00  0.000E+00  9.335E+00   4.0E+00
   39  108  3.502E+01  0.000E+00  0.000E+00  0.000E+00  0.000E+00  0.000E+00  2.978E+00   0.0E+00
   39  109  3.502E+01  0.000E+00  0.000E+00  0.000E+00  1.987E+06  0.000E+00  0.000E+00   0.0E+00
   39  110  3.499E+01  7.290E+08  2.230E-04  7.708E-05  0.000E+00  0.000E+00  4.458E+01   9.8E-01
   39  112  3.498E+01  0.000E+00  0.000E+00  0.000E+00  0.000E+00  0.000E+00  4.451E+01   0.0E+00
   39  118  3.453E+01  0.000E+00  0.000E+00  0.000E+00  3.962E+05  0.000E+00  0.000E+00   0.0E+00
   39  120  3.444E+01  0.000E+00  0.000E+00  0.000E+00  3.239E+04  3.502E-04  0.000E+00   0.0E+00
   39  121  3.437E+01  0.000E+00  0.000E+00  0.000E+00  1.203E+04  0.000E+00  0.000E+00   0.0E+00
   39  122  3.148E+01  0.000E+00  0.000E+00  0.000E+00  0.000E+00  2.356E+02  0.000E+00   0.0E+00
   39  123  3.146E+01  0.000E+00  0.000E+00  0.000E+00  3.834E+04  2.279E+01  0.000E+00   0.0E+00
   39  124  3.053E+01  1.113E+07  1.556E-06  4.693E-07  0.000E+00  0.000E+00  1.431E+00   2.4E+00
   39  125  3.032E+01  7.671E+07  3.525E-06  1.056E-06  0.000E+00  0.000E+00  0.000E+00   1.6E-03
   39  126  3.023E+01  1.439E+07  1.972E-06  5.887E-07  0.000E+00  0.000E+00  2.159E+01   4.3E-02
   39  127  3.022E+01  2.014E+07  4.595E-06  1.371E-06  0.000E+00  0.000E+00  7.501E-01   1.4E+00
   39  128  2.924E+01  0.000E+00  0.000E+00  0.000E+00  3.112E+04  2.725E-02  0.000E+00   0.0E+00
   39  129  2.917E+01  0.000E+00  0.000E+00  0.000E+00  2.067E+04  3.057E+01  0.000E+00   0.0E+00
   39  130  2.915E+01  0.000E+00  0.000E+00  0.000E+00  3.598E+04  0.000E+00  0.000E+00   0.0E+00
   39  131  2.910E+01  0.000E+00  0.000E+00  0.000E+00  1.246E+04  5.172E+01  0.000E+00   0.0E+00
   39  132  2.866E+01  0.000E+00  0.000E+00  0.000E+00  0.000E+00  0.000E+00  9.293E-01   0.0E+00
   39  133  2.864E+01  6.281E+07  1.287E-05  3.641E-06  0.000E+00  0.000E+00  3.356E+00   1.0E+00
   39  135  2.863E+01  0.000E+00  0.000E+00  0.000E+00  0.000E+00  0.000E+00  1.128E+00   0.0E+00
   39  137  2.856E+01  0.000E+00  0.000E+00  0.000E+00  2.227E+05  0.000E+00  0.000E+00   0.0E+00
   40   41  1.542E+04  0.000E+00  0.000E+00  0.000E+00  1.059E-06  9.250E-01  0.000E+00   0.0E+00
   40   42  1.553E+03  0.000E+00  0.000E+00  0.000E+00  5.673E+00  0.000E+00  0.000E+00   0.0E+00
   40   43  1.509E+03  0.000E+00  0.000E+00  0.000E+00  3.785E-01  1.676E+03  0.000E+00   0.0E+00
   40   44  1.255E+03  0.000E+00  0.000E+00  0.000E+00  4.766E+00  2.121E+03  0.000E+00   0.0E+00
   40   45  6.939E+02  0.000E+00  0.000E+00  0.000E+00  0.000E+00  3.125E+04  0.000E+00   0.0E+00
   40   46  3.554E+02  7.724E+09  4.875E-02  1.711E-01  0.000E+00  0.000E+00  0.000E+00   1.0E+00
   40   47  3.446E+02  6.305E+09  1.122E-01  3.820E-01  0.000E+00  0.000E+00  2.778E-01   1.0E+00
   40   48  3.333E+02  0.000E+00  0.000E+00  0.000E+00  0.000E+00  0.000E+00  1.758E-01   0.0E+00
   40   49  3.277E+02  3.673E+09  9.856E-02  3.190E-01  0.000E+00  0.000E+00  1.271E-01   1.0E+00
   40   51  3.164E+02  2.311E+08  5.781E-03  1.806E-02  0.000E+00  0.000E+00  2.291E+00   1.1E+00
   40   52  3.057E+02  0.000E+00  0.000E+00  0.000E+00  0.000E+00  0.000E+00  4.753E-01   0.0E+00
   40   53  2.720E+02  7.214E+08  8.000E-03  2.149E-02  0.000E+00  0.000E+00  1.001E+01   8.8E-01
   40   54  2.314E+02  0.000E+00  0.000E+00  0.000E+00  5.787E+04  3.706E+01  0.000E+00   0.0E+00
   40   56  2.286E+02  0.000E+00  0.000E+00  0.000E+00  3.393E+04  4.394E-01  0.000E+00   0.0E+00
   40   58  2.253E+02  0.000E+00  0.000E+00  0.000E+00  2.215E+04  0.000E+00  0.000E+00   0.0E+00
   40   59  2.243E+02  0.000E+00  0.000E+00  0.000E+00  1.031E+04  4.352E-02  0.000E+00   0.0E+00
   40   60  2.235E+02  0.000E+00  0.000E+00  0.000E+00  4.472E+00  0.000E+00  0.000E+00   0.0E+00
   40   61  2.263E+02  2.805E+04  7.180E-08  1.605E-07  0.000E+00  0.000E+00  0.000E+00   4.5E+02
   40   63  2.232E+02  2.123E+07  1.586E-04  3.497E-04  0.000E+00  0.000E+00  2.946E-01   2.9E-01
   40   64  1.567E+02  0.000E+00  0.000E+00  0.000E+00  3.349E+01  7.313E+05  0.000E+00   0.0E+00
   40   65  1.447E+02  0.000E+00  0.000E+00  0.000E+00  0.000E+00  4.702E+06  0.000E+00   0.0E+00
   40   66  1.421E+02  0.000E+00  0.000E+00  0.000E+00  7.657E+01  7.628E+04  0.000E+00   0.0E+00
   40   67  1.414E+02  0.000E+00  0.000E+00  0.000E+00  1.271E+02  9.308E+03  0.000E+00   0.0E+00
   40   68  1.071E+02  6.030E+06  1.728E-05  1.827E-05  0.000E+00  0.000E+00  8.694E-02   6.0E-01
   40   69  1.054E+02  1.857E+07  5.153E-05  5.363E-05  0.000E+00  0.000E+00  5.652E-01   6.9E-01
   40   70  1.048E+02  0.000E+00  0.000E+00  0.000E+00  0.000E+00  0.000E+00  2.872E-01   0.0E+00
   40   71  1.032E+02  4.637E+06  7.404E-06  7.546E-06  0.000E+00  0.000E+00  5.304E+00   2.0E-01
   40   72  9.305E+01  0.000E+00  0.000E+00  0.000E+00  4.721E+01  0.000E+00  0.000E+00   0.0E+00
   40   73  9.277E+01  0.000E+00  0.000E+00  0.000E+00  5.485E+00  5.577E+00  0.000E+00   0.0E+00
   40   75  9.242E+01  0.000E+00  0.000E+00  0.000E+00  2.386E+03  0.000E+00  0.000E+00   0.0E+00
   40   76  4.822E+01  0.000E+00  0.000E+00  0.000E+00  2.227E+04  4.026E+02  0.000E+00   0.0E+00
   40   77  4.742E+01  0.000E+00  0.000E+00  0.000E+00  0.000E+00  1.282E+02  0.000E+00   0.0E+00
   40   78  4.398E+01  3.325E+11  3.215E-02  1.397E-02  0.000E+00  0.000E+00  0.000E+00   6.9E-01
   40   79  4.396E+01  4.555E+10  1.320E-02  5.730E-03  0.000E+00  0.000E+00  9.492E+03   6.9E-01
   40   80  4.298E+01  8.695E+10  4.014E-02  1.704E-02  0.000E+00  0.000E+00  1.277E+00   9.9E-01
   40   81  4.262E+01  1.414E+10  3.850E-03  1.621E-03  0.000E+00  0.000E+00  4.662E+01   8.6E-01
   40   82  4.235E+01  1.394E+10  3.749E-03  1.568E-03  0.000E+00  0.000E+00  1.475E+02   9.1E-01
   40   83  4.227E+01  8.365E+10  3.734E-02  1.559E-02  0.000E+00  0.000E+00  7.210E+02   1.0E+00
   40   84  4.076E+01  0.000E+00  0.000E+00  0.000E+00  1.398E+06  7.118E+01  0.000E+00   0.0E+00
   40   85  4.075E+01  0.000E+00  0.000E+00  0.000E+00  2.676E+06  4.486E+02  0.000E+00   0.0E+00
   40   86  4.028E+01  0.000E+00  0.000E+00  0.000E+00  1.331E+08  0.000E+00  0.000E+00   0.0E+00
   40   87  4.023E+01  0.000E+00  0.000E+00  0.000E+00  8.741E+06  2.901E+04  0.000E+00   0.0E+00
   40   88  4.014E+01  0.000E+00  0.000E+00  0.000E+00  4.057E+07  2.401E+04  0.000E+00   0.0E+00
   40   89  3.964E+01  0.000E+00  0.000E+00  0.000E+00  0.000E+00  1.763E+04  0.000E+00   0.0E+00
   40   90  3.904E+01  0.000E+00  0.000E+00  0.000E+00  3.074E+07  8.435E+02  0.000E+00   0.0E+00
   40   91  3.896E+01  0.000E+00  0.000E+00  0.000E+00  1.412E+07  1.991E+00  0.000E+00   0.0E+00
   40   92  3.878E+01  0.000E+00  0.000E+00  0.000E+00  9.385E+06  0.000E+00  0.000E+00   0.0E+00
   40   93  3.860E+01  9.594E+11  7.142E-02  2.722E-02  0.000E+00  0.000E+00  0.000E+00   9.9E-01
   40   94  3.853E+01  7.149E+11  1.591E-01  6.056E-02  0.000E+00  0.000E+00  2.397E+03   1.0E+00
   40   95  3.847E+01  0.000E+00  0.000E+00  0.000E+00  0.000E+00  0.000E+00  1.373E+03   0.0E+00
   40   96  3.843E+01  3.689E+11  1.361E-01  5.167E-02  0.000E+00  0.000E+00  4.604E+02   1.0E+00
   40   98  3.835E+01  8.665E+09  3.184E-03  1.206E-03  0.000E+00  0.000E+00  1.374E+04   9.7E-01
   40   99  3.844E+01  0.000E+00  0.000E+00  0.000E+00  8.559E+05  5.313E+01  0.000E+00   0.0E+00
   40  100  3.828E+01  0.000E+00  0.000E+00  0.000E+00  0.000E+00  0.000E+00  2.229E+03   0.0E+00
   40  101  3.797E+01  3.009E+10  6.504E-03  2.439E-03  0.000E+00  0.000E+00  2.613E+04   1.0E+00
   40  102  3.761E+01  2.121E+07  7.495E-06  2.784E-06  0.000E+00  0.000E+00  2.836E-04   9.2E-01
   40  103  3.756E+01  0.000E+00  0.000E+00  0.000E+00  0.000E+00  0.000E+00  1.864E+00   0.0E+00
   40  105  3.749E+01  0.000E+00  0.000E+00  0.000E+00  8.110E+08  1.171E+00  0.000E+00   0.0E+00
   40  107  3.746E+01  0.000E+00  0.000E+00  0.000E+00  5.451E+08  4.959E-01  0.000E+00   0.0E+00
   40  108  3.744E+01  0.000E+00  0.000E+00  0.000E+00  2.588E+08  0.000E+00  0.000E+00   0.0E+00
   40  109  3.745E+01  0.000E+00  0.000E+00  0.000E+00  0.000E+00  0.000E+00  2.034E+00   0.0E+00
   40  110  3.741E+01  0.000E+00  0.000E+00  0.000E+00  2.952E+07  1.013E-01  0.000E+00   0.0E+00
   40  112  3.740E+01  0.000E+00  0.000E+00  0.000E+00  1.645E+07  0.000E+00  0.000E+00   0.0E+00
   40  118  3.688E+01  0.000E+00  0.000E+00  0.000E+00  0.000E+00  0.000E+00  2.036E+00   0.0E+00
   40  120  3.678E+01  7.781E+07  2.630E-05  9.551E-06  0.000E+00  0.000E+00  1.191E+00   1.0E+00
   40  121  3.670E+01  0.000E+00  0.000E+00  0.000E+00  0.000E+00  0.000E+00  4.362E+00   0.0E+00
   40  122  3.343E+01  1.634E+08  9.123E-06  3.012E-06  0.000E+00  0.000E+00  0.000E+00   9.7E-03
   40  123  3.340E+01  5.079E+00  8.495E-13  2.803E-13  0.000E+00  0.000E+00  8.067E+00   4.9E+06
   40  124  3.236E+01  0.000E+00  0.000E+00  0.000E+00  2.088E+05  3.994E+01  0.000E+00   0.0E+00
   40  125  3.212E+01  0.000E+00  0.000E+00  0.000E+00  0.000E+00  3.726E+03  0.000E+00   0.0E+00
   40  126  3.202E+01  0.000E+00  0.000E+00  0.000E+00  4.269E+04  8.206E+01  0.000E+00   0.0E+00
   40  127  3.201E+01  0.000E+00  0.000E+00  0.000E+00  6.556E+04  1.268E+01  0.000E+00   0.0E+00
   40  128  3.091E+01  7.679E+05  1.833E-07  5.598E-08  0.000E+00  0.000E+00  5.354E-02   3.8E-02
   40  129  3.084E+01  2.165E+08  5.143E-05  1.567E-05  0.000E+00  0.000E+00  3.181E+01   1.3E+00
   40  130  3.082E+01  0.000E+00  0.000E+00  0.000E+00  0.000E+00  0.000E+00  3.509E+00   0.0E+00
   40  131  3.076E+01  1.549E+07  2.197E-06  6.675E-07  0.000E+00  0.000E+00  1.048E+01   2.3E+00
   40  132  3.026E+01  0.000E+00  0.000E+00  0.000E+00  1.762E+02  0.000E+00  0.000E+00   0.0E+00
   40  133  3.024E+01  0.000E+00  0.000E+00  0.000E+00  6.756E+04  3.107E+00  0.000E+00   0.0E+00
   40  135  3.023E+01  0.000E+00  0.000E+00  0.000E+00  5.381E+05  0.000E+00  0.000E+00   0.0E+00
   40  137  3.015E+01  0.000E+00  0.000E+00  0.000E+00  0.000E+00  0.000E+00  2.918E-02   0.0E+00
   41   42  1.727E+03  0.000E+00  0.000E+00  0.000E+00  1.923E+00  1.776E+03  0.000E+00   0.0E+00
   41   43  1.672E+03  0.000E+00  0.000E+00  0.000E+00  5.170E+00  6.743E+02  0.000E+00   0.0E+00
   41   44  1.366E+03  0.000E+00  0.000E+00  0.000E+00  1.126E+01  1.678E+03  0.000E+00   0.0E+00
   41   45  7.266E+02  0.000E+00  0.000E+00  0.000E+00  3.946E+02  0.000E+00  0.000E+00   0.0E+00
   41   46  3.638E+02  0.000E+00  0.000E+00  0.000E+00  0.000E+00  0.000E+00  1.994E-01   0.0E+00
   41   47  3.525E+02  9.391E+08  1.049E-02  6.089E-02  0.000E+00  0.000E+00  3.539E-01   1.1E+00
   41   48  3.406E+02  7.826E+09  1.906E-01  1.069E+00  0.000E+00  0.000E+00  1.468E-01   1.0E+00
   41   49  3.348E+02  3.226E+09  5.423E-02  2.989E-01  0.000E+00  0.000E+00  6.294E-01   9.9E-01
   41   50  3.327E+02  0.000E+00  0.000E+00  0.000E+00  0.000E+00  0.000E+00  2.478E+00   0.0E+00
   41   51  3.230E+02  1.008E+09  1.577E-02  8.383E-02  0.000E+00  0.000E+00  2.952E-01   9.8E-01
   41   52  3.118E+02  2.098E+07  4.282E-04  2.198E-03  0.000E+00  0.000E+00  1.886E+00   9.3E-01
   41   53  2.769E+02  2.511E+08  1.731E-03  7.890E-03  0.000E+00  0.000E+00  1.177E-01   1.1E+00
   41   54  2.350E+02  0.000E+00  0.000E+00  0.000E+00  5.162E+03  2.573E+02  0.000E+00   0.0E+00
   41   55  2.334E+02  0.000E+00  0.000E+00  0.000E+00  5.437E+04  0.000E+00  0.000E+00   0.0E+00
   41   56  2.320E+02  0.000E+00  0.000E+00  0.000E+00  1.008E+04  8.580E-02  0.000E+00   0.0E+00
   41   58  2.287E+02  0.000E+00  0.000E+00  0.000E+00  3.274E+04  3.834E-02  0.000E+00   0.0E+00
   41   59  2.276E+02  0.000E+00  0.000E+00  0.000E+00  7.117E+03  4.534E-02  0.000E+00   0.0E+00
   41   60  2.268E+02  0.000E+00  0.000E+00  0.000E+00  3.467E+03  2.825E-01  0.000E+00   0.0E+00
   41   61  2.297E+02  0.000E+00  0.000E+00  0.000E+00  0.000E+00  0.000E+00  3.133E-02   0.0E+00
   41   62  2.251E+02  0.000E+00  0.000E+00  0.000E+00  4.823E+02  0.000E+00  0.000E+00   0.0E+00
   41   63  2.265E+02  3.993E+06  1.843E-05  6.872E-05  0.000E+00  0.000E+00  2.950E-04   3.4E-01
   41   64  1.583E+02  0.000E+00  0.000E+00  0.000E+00  1.429E+03  3.778E+06  0.000E+00   0.0E+00
   41   65  1.461E+02  0.000E+00  0.000E+00  0.000E+00  9.676E+02  0.000E+00  0.000E+00   0.0E+00
   41   66  1.435E+02  0.000E+00  0.000E+00  0.000E+00  2.317E+02  5.562E+02  0.000E+00   0.0E+00
   41   67  1.427E+02  0.000E+00  0.000E+00  0.000E+00  1.796E+02  2.191E+02  0.000E+00   0.0E+00
   41   68  1.078E+02  8.169E+06  1.424E-05  2.528E-05  0.000E+00  0.000E+00  4.198E-03   3.8E-01
   41   69  1.061E+02  3.268E+07  5.515E-05  9.632E-05  0.000E+00  0.000E+00  6.704E-01   6.6E-01
   41   70  1.055E+02  3.387E+06  7.915E-06  1.375E-05  0.000E+00  0.000E+00  1.453E-01   5.9E-01
   41   71  1.039E+02  8.564E+07  8.315E-05  1.422E-04  0.000E+00  0.000E+00  1.216E-01   3.2E-01
   41   72  9.362E+01  0.000E+00  0.000E+00  0.000E+00  4.097E+01  2.465E+00  0.000E+00   0.0E+00
   41   73  9.333E+01  0.000E+00  0.000E+00  0.000E+00  5.713E+02  1.887E+01  0.000E+00   0.0E+00
   41   74  9.303E+01  0.000E+00  0.000E+00  0.000E+00  3.212E+02  0.000E+00  0.000E+00   0.0E+00
   41   75  9.298E+01  0.000E+00  0.000E+00  0.000E+00  6.325E+02  3.115E+01  0.000E+00   0.0E+00
   41   76  4.837E+01  0.000E+00  0.000E+00  0.000E+00  2.782E+05  7.800E+02  0.000E+00   0.0E+00
   41   77  4.757E+01  0.000E+00  0.000E+00  0.000E+00  2.643E+05  0.000E+00  0.000E+00   0.0E+00
   41   78  4.411E+01  0.000E+00  0.000E+00  0.000E+00  0.000E+00  0.000E+00  2.000E+04   0.0E+00
   41   79  4.409E+01  3.822E+11  6.682E-02  4.849E-02  0.000E+00  0.000E+00  9.280E+03   7.1E-01
   41   80  4.310E+01  6.727E+10  1.874E-02  1.329E-02  0.000E+00  0.000E+00  1.854E+01   9.7E-01
   41   81  4.274E+01  4.766E+10  7.831E-03  5.510E-03  0.000E+00  0.000E+00  1.158E-01   1.0E+00
   41   82  4.247E+01  1.066E+11  1.729E-02  1.209E-02  0.000E+00  0.000E+00  4.379E+02   1.2E+00
   41   83  4.238E+01  7.711E+10  2.076E-02  1.449E-02  0.000E+00  0.000E+00  3.245E+00   1.0E+00
   41   84  4.087E+01  0.000E+00  0.000E+00  0.000E+00  3.991E+06  3.374E+01  0.000E+00   0.0E+00
   41   85  4.086E+01  0.000E+00  0.000E+00  0.000E+00  1.022E+05  1.483E+02  0.000E+00   0.0E+00
   41   86  4.039E+01  0.000E+00  0.000E+00  0.000E+00  7.928E+07  4.036E+04  0.000E+00   0.0E+00
   41   87  4.034E+01  0.000E+00  0.000E+00  0.000E+00  1.798E+08  5.730E+03  0.000E+00   0.0E+00
   41   88  4.025E+01  0.000E+00  0.000E+00  0.000E+00  1.402E+08  2.274E+04  0.000E+00   0.0E+00
   41   89  3.974E+01  0.000E+00  0.000E+00  0.000E+00  2.054E+08  0.000E+00  0.000E+00   0.0E+00
   41   90  3.914E+01  0.000E+00  0.000E+00  0.000E+00  5.405E+06  2.440E+03  0.000E+00   0.0E+00
   41   91  3.906E+01  0.000E+00  0.000E+00  0.000E+00  4.611E+06  2.543E+01  0.000E+00   0.0E+00
   41   92  3.888E+01  0.000E+00  0.000E+00  0.000E+00  8.748E+04  3.918E+02  0.000E+00   0.0E+00
   41   93  3.869E+01  0.000E+00  0.000E+00  0.000E+00  0.000E+00  0.000E+00  2.096E+03   0.0E+00
   41   94  3.863E+01  1.166E+11  1.565E-02  9.949E-03  0.000E+00  0.000E+00  3.837E+03   9.8E-01
   41   95  3.857E+01  8.646E+11  2.699E-01  1.714E-01  0.000E+00  0.000E+00  1.204E+03   9.9E-01
   41   96  3.853E+01  3.513E+11  7.818E-02  4.958E-02  0.000E+00  0.000E+00  4.367E+03   1.0E+00
   41   97  3.851E+01  0.000E+00  0.000E+00  0.000E+00  0.000E+00  0.000E+00  1.856E+04   0.0E+00
   41   98  3.845E+01  6.834E+10  1.514E-02  9.583E-03  0.000E+00  0.000E+00  2.270E+03   1.0E+00
   41   99  3.853E+01  0.000E+00  0.000E+00  0.000E+00  5.314E+05  1.094E+02  0.000E+00   0.0E+00
   41  100  3.837E+01  1.177E+09  3.636E-04  2.296E-04  0.000E+00  0.000E+00  1.010E+04   1.0E+00
   41  101  3.806E+01  1.518E+10  1.978E-03  1.239E-03  0.000E+00  0.000E+00  3.985E+02   9.6E-01
   41  102  3.770E+01  3.231E+07  6.885E-06  4.273E-06  0.000E+00  0.000E+00  9.453E-01   9.2E-01
   41  103  3.765E+01  7.393E+07  2.200E-05  1.363E-05  0.000E+00  0.000E+00  1.943E-01   1.2E+00
   41  104  3.760E+01  0.000E+00  0.000E+00  0.000E+00  8.240E+08  0.000E+00  0.000E+00   0.0E+00
   41  105  3.758E+01  0.000E+00  0.000E+00  0.000E+00  7.679E+07  5.937E+00  0.000E+00   0.0E+00
   41  107  3.755E+01  0.000E+00  0.000E+00  0.000E+00  2.003E+08  4.616E+00  0.000E+00   0.0E+00
   41  108  3.753E+01  0.000E+00  0.000E+00  0.000E+00  4.897E+08  3.517E+00  0.000E+00   0.0E+00
   41  109  3.754E+01  7.383E+08  2.184E-04  1.349E-04  0.000E+00  0.000E+00  6.693E-01   1.0E+00
   41  110  3.750E+01  0.000E+00  0.000E+00  0.000E+00  3.828E+07  1.094E+00  0.000E+00   0.0E+00
   41  111  3.752E+01  0.000E+00  0.000E+00  0.000E+00  0.000E+00  0.000E+00  8.615E+00   0.0E+00
   41  112  3.749E+01  0.000E+00  0.000E+00  0.000E+00  3.796E+05  5.224E-05  0.000E+00   0.0E+00
   41  113  3.749E+01  0.000E+00  0.000E+00  0.000E+00  4.015E+06  0.000E+00  0.000E+00   0.0E+00
   41  116  3.740E+01  0.000E+00  0.000E+00  0.000E+00  0.000E+00  0.000E+00  3.179E-02   0.0E+00
   41  118  3.697E+01  1.616E+09  4.638E-04  2.822E-04  0.000E+00  0.000E+00  9.722E+00   1.0E+00
   41  119  3.692E+01  0.000E+00  0.000E+00  0.000E+00  0.000E+00  0.000E+00  1.402E+01   0.0E+00
   41  120  3.687E+01  1.309E+08  2.668E-05  1.619E-05  0.000E+00  0.000E+00  6.329E+00   1.0E+00
   41  121  3.678E+01  1.476E+07  4.192E-06  2.538E-06  0.000E+00  0.000E+00  1.875E+01   1.3E+00
   41  122  3.350E+01  0.000E+00  0.000E+00  0.000E+00  0.000E+00  0.000E+00  6.817E+01   0.0E+00
   41  123  3.347E+01  2.841E+07  2.864E-06  1.578E-06  0.000E+00  0.000E+00  7.874E+00   1.2E-02
   41  124  3.243E+01  0.000E+00  0.000E+00  0.000E+00  3.552E+04  2.252E+02  0.000E+00   0.0E+00
   41  125  3.219E+01  0.000E+00  0.000E+00  0.000E+00  4.591E+04  0.000E+00  0.000E+00   0.0E+00
   41  126  3.209E+01  0.000E+00  0.000E+00  0.000E+00  3.948E+03  1.860E+00  0.000E+00   0.0E+00
   41  127  3.207E+01  0.000E+00  0.000E+00  0.000E+00  1.390E+04  1.515E-02  0.000E+00   0.0E+00
   41  128  3.098E+01  2.283E+07  3.284E-06  1.674E-06  0.000E+00  0.000E+00  1.242E-01   2.9E-01
   41  129  3.090E+01  4.289E+06  6.140E-07  3.123E-07  0.000E+00  0.000E+00  1.426E+00   2.0E+00
   41  130  3.088E+01  5.096E+07  1.020E-05  5.183E-06  0.000E+00  0.000E+00  5.246E+00   1.0E+00
   41  131  3.082E+01  9.959E+06  8.510E-07  4.317E-07  0.000E+00  0.000E+00  5.492E+00   2.8E+00
   41  132  3.032E+01  0.000E+00  0.000E+00  0.000E+00  6.169E+03  1.597E+00  0.000E+00   0.0E+00
   41  133  3.030E+01  0.000E+00  0.000E+00  0.000E+00  1.920E+04  2.014E+01  0.000E+00   0.0E+00
   41  134  3.029E+01  0.000E+00  0.000E+00  0.000E+00  1.050E+05  0.000E+00  0.000E+00   0.0E+00
   41  135  3.029E+01  0.000E+00  0.000E+00  0.000E+00  5.381E+04  2.887E+00  0.000E+00   0.0E+00
   41  136  3.022E+01  0.000E+00  0.000E+00  0.000E+00  0.000E+00  0.000E+00  3.371E-02   0.0E+00
   41  137  3.021E+01  2.527E+06  4.841E-07  2.407E-07  0.000E+00  0.000E+00  3.754E-02   1.4E+00
   41  139  3.019E+01  0.000E+00  0.000E+00  0.000E+00  0.000E+00  0.000E+00  7.238E-02   0.0E+00
   42   43  5.310E+04  0.000E+00  0.000E+00  0.000E+00  1.323E-08  0.000E+00  0.000E+00   0.0E+00
   42   44  6.534E+03  0.000E+00  0.000E+00  0.000E+00  4.079E-03  7.271E-04  0.000E+00   0.0E+00
   42   47  4.429E+02  0.000E+00  0.000E+00  0.000E+00  0.000E+00  0.000E+00  8.695E-03   0.0E+00
   42   48  4.243E+02  7.010E+08  1.892E-02  1.850E-01  0.000E+00  0.000E+00  1.897E-03   1.0E+00
   42   49  4.154E+02  3.184E+08  5.884E-03  5.632E-02  0.000E+00  0.000E+00  1.389E-01   1.0E+00
   42   50  4.122E+02  5.302E+09  1.736E-01  1.649E+00  0.000E+00  0.000E+00  3.214E+00   1.0E+00
   42   51  3.974E+02  1.729E+06  2.924E-05  2.678E-04  0.000E+00  0.000E+00  6.519E-01   2.1E+00
   42   52  3.806E+02  1.305E+09  2.833E-02  2.485E-01  0.000E+00  0.000E+00  3.118E+00   9.6E-01
   42   53  3.297E+02  0.000E+00  0.000E+00  0.000E+00  0.000E+00  0.000E+00  1.426E-01   0.0E+00
   42   54  2.720E+02  0.000E+00  0.000E+00  0.000E+00  1.458E+02  0.000E+00  0.000E+00   0.0E+00
   42   55  2.699E+02  0.000E+00  0.000E+00  0.000E+00  3.999E+03  2.086E-03  0.000E+00   0.0E+00
   42   56  2.680E+02  0.000E+00  0.000E+00  0.000E+00  1.322E+03  4.549E+01  0.000E+00   0.0E+00
   42   57  2.663E+02  0.000E+00  0.000E+00  0.000E+00  3.625E+04  0.000E+00  0.000E+00   0.0E+00
   42   58  2.636E+02  0.000E+00  0.000E+00  0.000E+00  5.462E+03  5.655E-01  0.000E+00   0.0E+00
   42   59  2.622E+02  0.000E+00  0.000E+00  0.000E+00  1.142E+02  2.577E+00  0.000E+00   0.0E+00
   42   60  2.611E+02  0.000E+00  0.000E+00  0.000E+00  7.612E+02  2.779E+00  0.000E+00   0.0E+00
   42   62  2.589E+02  0.000E+00  0.000E+00  0.000E+00  1.380E+04  1.843E+00  0.000E+00   0.0E+00
   42   63  2.607E+02  0.000E+00  0.000E+00  0.000E+00  0.000E+00  0.000E+00  2.093E-03   0.0E+00
   42   64  1.743E+02  0.000E+00  0.000E+00  0.000E+00  3.775E+01  0.000E+00  0.000E+00   0.0E+00
   42   66  1.565E+02  0.000E+00  0.000E+00  0.000E+00  5.848E+03  0.000E+00  0.000E+00   0.0E+00
   42   67  1.556E+02  0.000E+00  0.000E+00  0.000E+00  1.284E+03  3.245E+06  0.000E+00   0.0E+00
   42   68  1.150E+02  1.023E+05  1.449E-07  3.841E-07  0.000E+00  0.000E+00  5.495E-02   4.1E-01
   42   69  1.131E+02  6.288E+07  8.605E-05  2.242E-04  0.000E+00  0.000E+00  2.939E-01   4.8E-01
   42   70  1.124E+02  2.354E+07  4.457E-05  1.154E-04  0.000E+00  0.000E+00  4.995E-02   4.8E-01
   42   71  1.105E+02  0.000E+00  0.000E+00  0.000E+00  0.000E+00  0.000E+00  3.485E-02   0.0E+00
   42   72  9.898E+01  0.000E+00  0.000E+00  0.000E+00  2.788E+01  1.783E+00  0.000E+00   0.0E+00
   42   73  9.866E+01  0.000E+00  0.000E+00  0.000E+00  2.886E+01  4.026E+01  0.000E+00   0.0E+00
   42   74  9.832E+01  0.000E+00  0.000E+00  0.000E+00  2.804E+02  1.348E+01  0.000E+00   0.0E+00
   42   75  9.827E+01  0.000E+00  0.000E+00  0.000E+00  1.095E+02  5.445E+01  0.000E+00   0.0E+00
   42   76  4.976E+01  0.000E+00  0.000E+00  0.000E+00  7.750E+05  0.000E+00  0.000E+00   0.0E+00
   42   79  4.524E+01  0.000E+00  0.000E+00  0.000E+00  0.000E+00  0.000E+00  4.923E+02   0.0E+00
   42   80  4.421E+01  6.625E+11  1.386E-01  1.412E-01  0.000E+00  0.000E+00  2.116E+02   8.4E-01
   42   81  4.383E+01  0.000E+00  0.000E+00  0.000E+00  0.000E+00  0.000E+00  3.208E+04   0.0E+00
   42   82  4.354E+01  0.000E+00  0.000E+00  0.000E+00  0.000E+00  0.000E+00  7.202E+03   0.0E+00
   42   83  4.345E+01  2.552E+10  5.159E-03  5.165E-03  0.000E+00  0.000E+00  1.614E+04   2.1E+00
   42   84  4.186E+01  0.000E+00  0.000E+00  0.000E+00  3.145E+08  0.000E+00  0.000E+00   0.0E+00
   42   85  4.185E+01  0.000E+00  0.000E+00  0.000E+00  1.056E+08  7.165E+04  0.000E+00   0.0E+00
   42   86  4.135E+01  0.000E+00  0.000E+00  0.000E+00  9.213E+07  1.284E+03  0.000E+00   0.0E+00
   42   87  4.130E+01  0.000E+00  0.000E+00  0.000E+00  2.450E+07  0.000E+00  0.000E+00   0.0E+00
   42   88  4.121E+01  0.000E+00  0.000E+00  0.000E+00  1.163E+08  1.591E+02  0.000E+00   0.0E+00
   42   90  4.005E+01  0.000E+00  0.000E+00  0.000E+00  5.040E+05  0.000E+00  0.000E+00   0.0E+00
   42   91  3.996E+01  0.000E+00  0.000E+00  0.000E+00  3.398E+06  5.554E+01  0.000E+00   0.0E+00
   42   92  3.978E+01  0.000E+00  0.000E+00  0.000E+00  7.526E+06  4.029E+01  0.000E+00   0.0E+00
   42   94  3.951E+01  0.000E+00  0.000E+00  0.000E+00  0.000E+00  0.000E+00  1.874E+02   0.0E+00
   42   95  3.945E+01  1.543E+11  3.600E-02  3.273E-02  0.000E+00  0.000E+00  3.117E+01   1.0E+00
   42   96  3.941E+01  6.651E+10  1.106E-02  1.004E-02  0.000E+00  0.000E+00  2.582E+03   9.9E-01
   42   97  3.939E+01  1.079E+12  3.226E-01  2.928E-01  0.000E+00  0.000E+00  7.096E+04   9.9E-01
   42   98  3.932E+01  1.656E+09  2.742E-04  2.485E-04  0.000E+00  0.000E+00  1.326E+04   8.5E-01
   42   99  3.941E+01  0.000E+00  0.000E+00  0.000E+00  3.267E+05  2.007E+03  0.000E+00   0.0E+00
   42  100  3.924E+01  2.000E+11  4.618E-02  4.176E-02  0.000E+00  0.000E+00  4.489E+04   1.0E+00
   42  101  3.892E+01  0.000E+00  0.000E+00  0.000E+00  0.000E+00  0.000E+00  1.350E+03   0.0E+00
   42  102  3.854E+01  1.565E+06  2.489E-07  2.211E-07  0.000E+00  0.000E+00  6.628E-02   9.2E-01
   42  103  3.849E+01  3.677E+07  8.168E-06  7.245E-06  0.000E+00  0.000E+00  1.674E+01   9.4E-01
   42  104  3.843E+01  0.000E+00  0.000E+00  0.000E+00  1.258E+08  3.030E+01  0.000E+00   0.0E+00
   42  105  3.842E+01  0.000E+00  0.000E+00  0.000E+00  4.235E+06  0.000E+00  0.000E+00   0.0E+00
   42  106  3.840E+01  0.000E+00  0.000E+00  0.000E+00  1.009E+09  0.000E+00  0.000E+00   0.0E+00
   42  107  3.838E+01  0.000E+00  0.000E+00  0.000E+00  3.871E+07  4.130E+00  0.000E+00   0.0E+00
   42  108  3.837E+01  0.000E+00  0.000E+00  0.000E+00  1.052E+08  4.636E+00  0.000E+00   0.0E+00
   42  109  3.837E+01  5.223E+05  1.153E-07  1.020E-07  0.000E+00  0.000E+00  1.291E+01   6.6E-01
   42  110  3.834E+01  0.000E+00  0.000E+00  0.000E+00  1.446E+04  8.781E+00  0.000E+00   0.0E+00
   42  111  3.835E+01  1.343E+08  3.806E-05  3.363E-05  0.000E+00  0.000E+00  1.229E+01   9.1E-01
   42  112  3.833E+01  0.000E+00  0.000E+00  0.000E+00  5.342E+07  1.618E+01  0.000E+00   0.0E+00
   42  113  3.832E+01  0.000E+00  0.000E+00  0.000E+00  3.238E+08  8.157E+00  0.000E+00   0.0E+00
   42  114  3.826E+01  0.000E+00  0.000E+00  0.000E+00  0.000E+00  0.000E+00  3.118E-02   0.0E+00
   42  116  3.822E+01  5.661E+05  1.594E-07  1.404E-07  0.000E+00  0.000E+00  3.558E-03   9.1E-01
   42  117  3.820E+01  0.000E+00  0.000E+00  0.000E+00  0.000E+00  0.000E+00  8.046E-01   0.0E+00
   42  118  3.778E+01  7.938E+07  1.699E-05  1.479E-05  0.000E+00  0.000E+00  4.524E+00   1.0E+00
   42  119  3.772E+01  1.335E+09  3.662E-04  3.183E-04  0.000E+00  0.000E+00  1.626E+02   1.0E+00
   42  120  3.767E+01  7.714E+06  1.172E-06  1.017E-06  0.000E+00  0.000E+00  2.064E-02   1.0E+00
   42  121  3.759E+01  9.063E+07  1.920E-05  1.663E-05  0.000E+00  0.000E+00  6.049E+01   1.0E+00
   42  123  3.414E+01  0.000E+00  0.000E+00  0.000E+00  0.000E+00  0.000E+00  2.933E+01   0.0E+00
   42  124  3.305E+01  0.000E+00  0.000E+00  0.000E+00  3.445E+02  0.000E+00  0.000E+00   0.0E+00
   42  126  3.270E+01  0.000E+00  0.000E+00  0.000E+00  1.018E+03  0.000E+00  0.000E+00   0.0E+00
   42  127  3.268E+01  0.000E+00  0.000E+00  0.000E+00  2.287E+03  6.359E+00  0.000E+00   0.0E+00
   42  128  3.154E+01  1.170E+04  1.246E-09  9.057E-10  0.000E+00  0.000E+00  6.645E-01   6.4E+01
   42  129  3.146E+01  4.874E+06  5.167E-07  3.746E-07  0.000E+00  0.000E+00  1.523E+01   5.9E+00
   42  130  3.144E+01  5.368E+06  7.955E-07  5.763E-07  0.000E+00  0.000E+00  9.632E-01   1.1E-01
   42  131  3.138E+01  0.000E+00  0.000E+00  0.000E+00  0.000E+00  0.000E+00  4.373E+00   0.0E+00
   42  132  3.086E+01  0.000E+00  0.000E+00  0.000E+00  1.053E+03  9.793E-02  0.000E+00   0.0E+00
   42  133  3.084E+01  0.000E+00  0.000E+00  0.000E+00  9.466E+01  1.094E+00  0.000E+00   0.0E+00
   42  134  3.083E+01  0.000E+00  0.000E+00  0.000E+00  7.664E+03  4.725E+00  0.000E+00   0.0E+00
   42  135  3.083E+01  0.000E+00  0.000E+00  0.000E+00  5.395E+02  2.250E+01  0.000E+00   0.0E+00
   42  136  3.075E+01  1.666E+05  3.037E-08  2.152E-08  0.000E+00  0.000E+00  1.876E-02   1.3E+00
   42  137  3.075E+01  9.574E+05  1.357E-07  9.615E-08  0.000E+00  0.000E+00  3.434E-02   1.3E+00
   42  138  3.074E+01  0.000E+00  0.000E+00  0.000E+00  0.000E+00  0.000E+00  6.974E-03   0.0E+00
   42  139  3.073E+01  1.935E+07  3.522E-06  2.494E-06  0.000E+00  0.000E+00  3.428E+00   1.3E+00
   43   44  7.450E+03  0.000E+00  0.000E+00  0.000E+00  1.200E-03  5.950E-01  0.000E+00   0.0E+00
   43   45  1.285E+03  0.000E+00  0.000E+00  0.000E+00  0.000E+00  1.835E+02  0.000E+00   0.0E+00
   43   46  4.649E+02  1.934E+08  2.088E-03  9.588E-03  0.000E+00  0.000E+00  0.000E+00   9.1E-01
   43   47  4.466E+02  2.102E+08  6.287E-03  2.773E-02  0.000E+00  0.000E+00  2.130E-01   1.0E+00
   43   48  4.278E+02  0.000E+00  0.000E+00  0.000E+00  0.000E+00  0.000E+00  2.602E-05   0.0E+00
   43   49  4.186E+02  1.269E+07  5.558E-04  2.298E-03  0.000E+00  0.000E+00  3.289E-03   9.3E-01
   43   51  4.004E+02  4.221E+09  1.691E-01  6.686E-01  0.000E+00  0.000E+00  1.528E-03   1.0E+00
   43   52  3.833E+02  0.000E+00  0.000E+00  0.000E+00  0.000E+00  0.000E+00  2.709E+00   0.0E+00
   43   53  3.318E+02  4.122E+09  6.803E-02  2.229E-01  0.000E+00  0.000E+00  5.456E+00   8.2E-01
   43   54  2.734E+02  0.000E+00  0.000E+00  0.000E+00  1.390E+03  2.078E+01  0.000E+00   0.0E+00
   43   56  2.694E+02  0.000E+00  0.000E+00  0.000E+00  4.086E+03  6.380E+00  0.000E+00   0.0E+00
   43   58  2.649E+02  0.000E+00  0.000E+00  0.000E+00  1.028E+03  0.000E+00  0.000E+00   0.0E+00
   43   59  2.635E+02  0.000E+00  0.000E+00  0.000E+00  1.370E+04  3.380E-03  0.000E+00   0.0E+00
   43   60  2.624E+02  0.000E+00  0.000E+00  0.000E+00  2.428E+04  0.000E+00  0.000E+00   0.0E+00
   43   61  2.662E+02  4.045E+03  1.433E-08  3.768E-08  0.000E+00  0.000E+00  0.000E+00   5.0E+00
   43   63  2.620E+02  1.630E+08  1.677E-03  4.341E-03  0.000E+00  0.000E+00  2.708E-01   8.2E-01
   43   64  1.749E+02  0.000E+00  0.000E+00  0.000E+00  1.032E+02  2.455E+04  0.000E+00   0.0E+00
   43   65  1.601E+02  0.000E+00  0.000E+00  0.000E+00  0.000E+00  1.635E+05  0.000E+00   0.0E+00
   43   66  1.569E+02  0.000E+00  0.000E+00  0.000E+00  6.932E+01  1.853E+06  0.000E+00   0.0E+00
   43   67  1.560E+02  0.000E+00  0.000E+00  0.000E+00  2.073E+02  2.233E+05  0.000E+00   0.0E+00
   43   68  1.153E+02  1.846E+06  6.130E-06  6.979E-06  0.000E+00  0.000E+00  6.872E-03   2.9E-01
   43   69  1.133E+02  7.100E+05  2.277E-06  2.548E-06  0.000E+00  0.000E+00  7.150E-01   3.9E-01
   43   70  1.126E+02  0.000E+00  0.000E+00  0.000E+00  0.000E+00  0.000E+00  2.677E-02   0.0E+00
   43   71  1.108E+02  4.818E+08  8.862E-04  9.695E-04  0.000E+00  0.000E+00  6.097E+00   3.9E-01
   43   72  9.917E+01  0.000E+00  0.000E+00  0.000E+00  1.600E+01  0.000E+00  0.000E+00   0.0E+00
   43   73  9.885E+01  0.000E+00  0.000E+00  0.000E+00  1.044E+03  7.338E+00  0.000E+00   0.0E+00
   43   75  9.845E+01  0.000E+00  0.000E+00  0.000E+00  2.073E+02  0.000E+00  0.000E+00   0.0E+00
   43   76  4.981E+01  0.000E+00  0.000E+00  0.000E+00  3.284E+04  3.534E+03  0.000E+00   0.0E+00
   43   77  4.896E+01  0.000E+00  0.000E+00  0.000E+00  0.000E+00  2.274E+01  0.000E+00   0.0E+00
   43   78  4.531E+01  1.413E+10  1.449E-03  6.486E-04  0.000E+00  0.000E+00  0.000E+00   6.1E-01
   43   79  4.528E+01  6.808E+09  2.093E-03  9.359E-04  0.000E+00  0.000E+00  1.221E+02   1.1E+00
   43   80  4.424E+01  2.634E+10  1.288E-02  5.630E-03  0.000E+00  0.000E+00  1.377E+02   8.5E-01
   43   81  4.386E+01  6.729E+09  1.941E-03  8.407E-04  0.000E+00  0.000E+00  2.681E+03   6.7E-02
   43   82  4.358E+01  4.161E+11  1.185E-01  5.098E-02  0.000E+00  0.000E+00  8.826E+02   9.1E-01
   43   83  4.348E+01  1.350E+08  6.379E-05  2.740E-05  0.000E+00  0.000E+00  1.532E+04   1.4E-01
   43   84  4.190E+01  0.000E+00  0.000E+00  0.000E+00  8.999E+06  4.635E+04  0.000E+00   0.0E+00
   43   85  4.188E+01  0.000E+00  0.000E+00  0.000E+00  1.051E+08  5.493E+03  0.000E+00   0.0E+00
[truncated: 351,331 more chars]
